# Supplementary material for: Detection of human disease conditions by single-cell morpho-rheological phenotyping of blood
Source: eLife. 2018 Jan 13;7:e29213. doi: 10.7554/eLife.29213 (PMC5790376; doi:10.7554/eLife.29213)
Supplement: Figure 2—source data 1. [file elife-29213-fig2-data1.xlsx]

## Sheet: Figure2
Figure 2A to 2C (erythrocytes in spherocytosis, all population data in Figure2-sourceData, normal in Figure1-sourceData)														Figure 2D to 2F (erythrocytes incubated with P.f., all population data in Figure2-Supplement2)																												Figure 2G to 2H (erythrocytes treated with 2BP, all population data in Figure2-sourceData)
example population data						medians of populations relative to mean of all population medians of normal control (Figure 2C)								example population data									mean and SD of population medians and population medians (Figure 2F)																			mean and SD of population medians (Figure 2G)				counted parasitemia and binomila SD (Figure 2H)
																																										treatment	deformation	SD deformation
normal (Figure 2A)			spherocytosis (Figure 2B)			normal (see Figure 1E)				spherocytosis				12h control (Figure 2D)			12h exposed (Figure 2E)			12h identified infected (Figure 2E)			control			mean and SD P.f. exposed				mean and SD identified as P.f. infected				medians P.f. exposed				medians for identified as P.f. infected					[]	[]		incubation with P.f. at day 2
cell size	deformation		cell size	deformation		donor	rel. cell size	rel. deformation		patient	rel. cell size	rel. deformation		cell size	deformation		cell size	deformation		cell size	deformation		incubation time	deformation		incubation time	deformation	SD deformation		incubation time	deformation	SD deformation		incubation time	sample 1 deformation	sample 2 deformation		incubation time	sample 1 deformation	sample 2 deformation		control	0.26776	0.00741		treatment	parasitemia	SD parasitemia
[µm^2]	[]		[µm^2]	[]			[]	[]			[]	[]		[µm^2]	[]		[µm^2]	[]		[µm^2]	[]		[h]	[]		[h]	[]	[]		[h]	[]	[]		[h]	[]	[]		[h]	[]	[]		PA	0.26431	0.00736			[%]	[%]
34.391	0.35526		35.9516	0.29241		m1	1.01645	1.0439		1	0.95886	0.7607		37.57	0.29108		35.4892	0.18264		55.488	0.22111		4	0.28705		4	0.26791	0.00516		4	0.214	0.00707		4	0.26426	0.27156		4	0.219	0.209		2BP	0.25133	0.00252		control	0.95	0.14
37.5122	0.31834		37.3388	0.2946		m2	0.9963	1.04985		2	0.96462	0.8918		39.015	0.31463		35.4892	0.18264		34.1598	0.25833		12	0.28939		12	0.26313	0.00906		12	0.233	0.00424		12	0.25672	0.26953		12	0.236	0.23						PA	0.69	0.31
40.5756	0.33231		36.125	0.21319		m3	0.95742	0.99249		3	0.9603	0.78781		38.2058	0.33147		35.4892	0.18264		27.2238	0.28334		16	0.2973		16	0.25844	0.0077		16	0.2255	0.05445		16	0.25299	0.26388		16	0.187	0.264						2BP	0.12	0.12
41.7894	0.3801		32.3102	0.2832		m4	1.0035	0.9665		4	0.87392	0.75615		33.6974	0.25222		35.4892	0.18264		36.2406	0.29314		20	0.28277		20	0.24865	0.01083		20	0.208	0.00707		20	0.24099	0.25631		20	0.203	0.213		p-values for comparing:
44.9684	0.38896		42.5986	0.27418		m5	0.9819	1.00586						35.836	0.28501		44.506	0.28955		32.1946	0.23277		24	0.28032		24	0.25102	0.01783		24	0.212	0.00566		24	0.23841	0.26362		24	0.216	0.208			deformation
40.6912	0.37768		34.102	0.24633		f1	1.02509	0.99629						38.3792	0.27211		38.6104	0.22194		26.6458	0.19292		36	0.28226		36	0.24522	0.00691		36	0.136	0.01414		36	0.24033	0.2501		36	0.146	0.126		control/PA	0.2754	(from linear mixed models)		p-values for comparing:
44.2748	0.35531		37.859	0.25995		f2	1.00062	0.98155						32.079	0.29368		35.0846	0.1756		38.8416	0.2385		42	0.28038		42	0.24736	0.02115		42	0.1285	0.02051		42	0.2324	0.26232		42	0.114	0.143		control/2BP	0.01054	(from linear mixed models)			day2 parasitemia	day4 parasitemia
36.0672	0.38832		37.3388	0.2946		f3	1.04813	1.04508						37.0498	0.25557		37.6856	0.30941		59.245	0.31237		46	0.26878		46	0.2383	0.0023		46	0.1195	0.000707107		46	0.23668	0.23993		46	0.12	0.119		PA/2BP	0.02521	(from linear mixed models)		control/PA	0.49	0.63
40.749	0.33276		36.125	0.21319		f4	1.00638	0.98733						38.0902	0.28459		31.1542	0.20781		31.5588	0.22218																									control/2BP	0.012	4.5e-06
40.3444	0.35032		32.3102	0.2832		f5	1.00638	1.00714						37.3966	0.25626		38.3792	0.2637		31.3854	0.09326																									PA/2BP	0.099	2.1e-05
35.6626	0.35493		42.5986	0.27418		f6	0.99774	1.00938						41.2692	0.33387		38.0902	0.32816		34.6222	0.21289		p-values for comparing:
37.859	0.36487		34.102	0.24633		m6	0.9675	1.00708						36.125	0.31757		31.9056	0.25095		44.217	0.29349		exposed / control at	deformation
37.9168	0.35061		37.859	0.25995		m7	1.02941	0.94323						37.7434	0.26848		39.1306	0.32427		38.8994	0.11431		4h	0.3566	(from linear mixed models)
39.9398	0.32583		36.3562	0.2677		f7	1.00638	0.97224						52.9448	0.3259		37.3966	0.24252		31.2698	0.28928		12h	0.001237	(from linear mixed models)
40.6334	0.36928		33.3506	0.27932		f8	1.00062	1.05042						34.7378	0.32069		40.2288	0.31464					16h	0.00966	(from linear mixed models)
32.079	0.27099		41.0958	0.25007		m8	0.96606	1.00351						29.8826	0.14281		31.9634	0.14136					20h	0.00107	(from linear mixed models)
38.7838	0.35015		41.7316	0.26244		f9	1.02509	1.00357						26.9926	0.11956		38.148	0.29898					24h	0.006762	(from linear mixed models)
45.8932	0.34238		40.0554	0.28145		m9	0.9891	0.94695						28.3798	0.08648		34.6222	0.25726					36h	0.003555	(from linear mixed models)
37.57	0.38406		36.3562	0.2677		m10	1.0107	0.98463						38.8416	0.29465		33.813	0.1638					42h	0.0006687	(from linear mixed models)
38.3792	0.33163		33.3506	0.27932		f10	0.99054	1.01054						38.2636	0.28066		33.9864	0.23284					46h	0.0002933	(from linear mixed models)
33.6974	0.29882		41.0958	0.25007		f11	0.9747	0.99257						31.501	0.20352		34.1598	0.2918
41.4426	0.38063		41.7316	0.26244										35.7204	0.32338		31.6166	0.21109
37.1076	0.32712		40.0554	0.28145		f.. Female								37.1076	0.33199		32.1368	0.28384
39.7086	0.3615		41.6738	0.26123		m.. Male								39.7664	0.30745		35.6626	0.2074
40.5178	0.36781		37.8012	0.25122										35.9516	0.25507		33.9864	0.17695
37.859	0.36487		39.7086	0.25904										42.483	0.26565		34.5066	0.30339
37.9168	0.35061		37.3966	0.26673										35.258	0.22381		36.703	0.31519
39.9398	0.32583		41.6738	0.25245										40.6912	0.29323		33.6396	0.30542
40.6334	0.36928		37.6856	0.28253										32.3102	0.17456		37.8012	0.23471
32.079	0.27099		30.345	0.21292										39.3618	0.33945		36.703	0.20881
38.7838	0.35015		38.3214	0.28539										36.992	0.33564		34.4488	0.26732
45.8932	0.34238		34.7956	0.27705										40.8068	0.32753		34.4488	0.26732
37.57	0.38406		44.2748	0.25787										36.7608	0.31116		26.1834	0.23255
38.3792	0.33163		40.1132	0.27718										40.8646	0.33447		33.9864	0.16713
33.6974	0.29882		34.8534	0.27344										38.148	0.20501		32.657	0.30301
41.4426	0.38063		35.6048	0.33247										37.1076	0.32128		33.9864	0.23838
37.1076	0.32712		37.8012	0.29483										38.148	0.27701		32.5414	0.21663
39.7086	0.3615		44.795	0.28769										34.7956	0.2288		36.4718	0.2006
40.5178	0.36781		37.6278	0.26358										40.9224	0.26663		37.6856	0.21663
47.107	0.34297		31.6166	0.30195										33.8708	0.31502		35.6048	0.24811
37.57	0.33373		42.483	0.26289										34.3332	0.28923		38.3792	0.20961
38.4948	0.38003		26.9926	0.25274										38.4948	0.26893		34.3332	0.18794
40.171	0.34901		31.9634	0.23537										34.7956	0.33163		37.859	0.28415
36.4718	0.33567		33.813	0.25434										32.8882	0.13104		35.6626	0.30816
40.2866	0.36157		43.1766	0.26106										38.3214	0.29712		40.6334	0.24485
47.4538	0.36216		37.8012	0.28214										33.7552	0.24108		37.6856	0.27063
36.6452	0.32544		38.2058	0.25889										34.5644	0.3147		35.9516	0.24391
41.9628	0.3713		35.6048	0.26648										38.8416	0.25177		38.148	0.10495
44.1014	0.34691		38.148	0.2693										40.6912	0.3035		33.5818	0.20613
36.7608	0.32313		40.9802	0.26126										37.3966	0.32158		30.4028	0.067
34.391	0.32587		36.2984	0.27499										32.1946	0.25329		39.4196	0.3324
38.3792	0.36031		38.9572	0.32013										39.593	0.28558		38.7838	0.20966
39.8242	0.3502		35.6626	0.28424										41.7316	0.31665		33.4662	0.22704
46.4712	0.36039		35.6048	0.2567										36.6452	0.26419		32.657	0.24692
39.304	0.30265		44.2748	0.23961										41.6738	0.29675		35.258	0.1672
39.3618	0.33267		34.969	0.26615										41.6738	0.29675		35.4314	0.23952
39.7664	0.34666		37.5122	0.2086										40.4022	0.28865		40.46	0.28491
33.9286	0.36836		43.1188	0.25008										40.9802	0.35924		33.5818	0.19934
39.4774	0.42661		42.1362	0.27223										39.6508	0.27587		39.0728	0.28596
42.3674	0.35422		36.5874	0.24195										33.0616	0.29377		39.1306	0.30287
44.4482	0.36574		40.1132	0.25946										27.3394	0.23777		31.4432	0.23621
41.038	0.33187		40.6334	0.25519										33.9286	0.23378		37.281	0.26478
42.2518	0.34179		30.6918	0.26815										36.7608	0.30662		33.3506	0.30354
38.9572	0.35569		33.9864	0.25923										33.0616	0.32629		34.4488	0.25114
43.928	0.35719		45.951	0.28757										43.8702	0.31095		31.0964	0.22159
36.9342	0.38306		47.685	0.2681										36.6452	0.29049		34.5066	0.0953
39.9976	0.35359		40.2288	0.24474										38.726	0.32946		42.8876	0.35433
38.6682	0.31037		41.905	0.25895										40.2288	0.31153		36.414	0.32322
40.749	0.36191		39.5352	0.27558										29.3046	0.20076		40.6334	0.26102
39.7086	0.34217		40.9224	0.26183										45.1996	0.30684		34.7378	0.18124
41.5582	0.32072		34.2754	0.24919										32.946	0.19152		34.1598	0.18934
35.7204	0.30012		34.3332	0.24131										37.9168	0.32552		31.2698	0.28201
40.9802	0.34161		37.1654	0.27487										27.2816	0.18566		28.1486	0.16365
39.0728	0.36028		39.7664	0.25814										37.4544	0.37745		33.9864	0.24378
41.038	0.36531		36.703	0.27462										37.6856	0.3331		38.726	0.26019
38.0902	0.3537		33.4084	0.2561										32.2524	0.25643		34.7378	0.30555
43.4078	0.35008		44.9684	0.28492										33.9286	0.21904		42.3096	0.3259
40.749	0.30771		32.7148	0.27545										36.3562	0.30745		27.3972	0.18245
37.3388	0.33253		40.6334	0.33465										33.1772	0.30619		35.0846	0.3122
41.3848	0.32786		41.5582	0.25343										31.212	0.23615		29.2468	0.17071
39.3618	0.34584		40.6334	0.25082										40.9224	0.30918		43.639	0.32724
39.1306	0.34282		40.8646	0.28337										36.5874	0.31403		35.6048	0.22544
42.8298	0.36395		26.9348	0.16335										41.4426	0.31921		32.079	0.27321
38.2058	0.34322		34.7956	0.26228										40.0554	0.27604		37.4544	0.32769
35.0846	0.36039		34.9112	0.27436										42.483	0.30012		31.2698	0.17302
48.9566	0.41363		43.6968	0.28872										39.1306	0.13307		32.1368	0.09376
45.7198	0.36996		32.5414	0.25277										39.4774	0.24371		33.9286	0.19777
34.5644	0.31865		32.5414	0.26402										37.1076	0.3027		38.2636	0.29373
38.9572	0.35302		25.3164	0.33338										36.8186	0.33338		31.7322	0.2493
44.4482	0.36147		36.1828	0.27155										34.102	0.20184		40.8068	0.29097
40.5756	0.38214		35.3158	0.30968										32.4258	0.21648		34.391	0.12419
43.5812	0.34884		36.8764	0.25574										33.0616	0.29115		36.414	0.28584
47.4538	0.36475		42.3674	0.2845										38.2636	0.27976		31.4432	0.23823
41.2114	0.39015		39.5352	0.26238										35.0846	0.28167		38.3214	0.29233
42.8876	0.37188		34.68	0.24792										37.5122	0.29878		38.5526	0.29651
44.217	0.37041		38.0324	0.2655										34.7378	0.27922		37.4544	0.24983
40.749	0.3212		39.5352	0.25931										32.7148	0.06973		37.4544	0.32493
39.5352	0.39978		38.7838	0.23382										31.0386	0.25394		32.5992	0.29906
44.4482	0.34474		33.813	0.17611										34.8534	0.31668		37.2232	0.22398
40.9224	0.33128		33.6974	0.26004										40.46	0.32518		38.7838	0.22908
42.194	0.33751		33.2928	0.24427										38.3792	0.30344		37.6856	0.3155
40.5178	0.35418		40.0554	0.24197										42.8298	0.35878		34.5644	0.18951
44.0436	0.33378		46.3556	0.26041										33.0038	0.16146		36.8764	0.26877
39.882	0.35913		41.0958	0.32818										29.0156	0.23598		36.125	0.21258
39.7664	0.34583		40.6334	0.25469										32.368	0.28568		37.2232	0.29784
43.5812	0.38691		36.3562	0.30393										39.1306	0.30233		28.8422	0.18488
39.3618	0.33365		37.7434	0.24748										34.391	0.25533		32.5414	0.1458
38.726	0.37043		34.6222	0.22418										40.8646	0.26017		38.6104	0.31057
40.5178	0.36086		39.0728	0.27442										36.1828	0.27348		33.9864	0.30901
37.1654	0.41261		38.3214	0.21716										36.2406	0.25015		41.7316	0.349
38.8416	0.34682		42.0206	0.26122										33.8708	0.35756		34.6222	0.22164
34.9112	0.37193		36.125	0.26139										35.0268	0.28028		43.1188	0.30432
39.1884	0.3632		37.5122	0.23917										36.4718	0.30114		32.2524	0.25838
41.4426	0.38025		37.4544	0.28374										33.6974	0.25161		30.2872	0.28846
39.593	0.3388		30.4028	0.26053										35.9516	0.29914		34.7956	0.29493
42.5408	0.36756		40.2288	0.30016										35.3158	0.28366		34.1598	0.25833
32.4258	0.34639		34.8534	0.20821										36.4718	0.32168		28.7844	0.24205
40.9224	0.37549		43.4078	0.28779										50.9796	0.2019		35.7204	0.22489
42.0784	0.36503		35.836	0.22516										42.7142	0.31313		39.593	0.24531
38.6682	0.33734		39.8242	0.24772										33.6396	0.23978		33.6396	0.30511
44.2748	0.33833		34.9112	0.28218										36.1828	0.29035		36.8186	0.28248
36.2984	0.33597		33.5818	0.26365										33.6974	0.26516		35.4892	0.19788
42.8298	0.343		41.7316	0.30262										45.3152	0.31293		36.7608	0.27702
45.5464	0.38064		40.171	0.23021										35.3736	0.32643		36.2984	0.25241
37.9168	0.35822		37.6856	0.24902										33.9286	0.29006		31.7322	0.28714
40.2866	0.33288		46.2978	0.28381										37.5122	0.2683		41.038	0.32098
41.7316	0.36285		35.0268	0.25478										35.7782	0.18478		36.7608	0.3415
35.9516	0.27679		35.8938	0.23423										34.4488	0.28276		36.5296	0.13873
34.969	0.31506		36.125	0.25631										34.391	0.28196		34.3332	0.26452
38.5526	0.34877		39.5352	0.28897										34.969	0.3209		34.5066	0.06066
45.951	0.37932		41.5004	0.30361										41.616	0.35721		39.9398	0.24586
39.7086	0.33986		41.5004	0.25264										33.6396	0.24209		27.2238	0.28334
37.6278	0.38271		45.373	0.28752										39.4196	0.29721		32.2524	0.24704
47.8584	0.37446		44.9684	0.29031										39.015	0.294		33.9286	0.2637
39.1884	0.35825		39.5352	0.24837										30.5184	0.21506		37.859	0.17732
39.593	0.35615		39.9398	0.23287										32.8882	0.26046		35.2002	0.24996
40.5756	0.36406		45.084	0.24589										34.3332	0.2034		35.4892	0.1344
38.8416	0.34572		29.767	0.34756										31.9056	0.25274		40.5178	0.25454
38.2058	0.33928		31.3854	0.2749										35.4892	0.3167		43.4656	0.29065
37.7434	0.31119		37.57	0.23615										42.9454	0.31913		36.992	0.28193
40.5756	0.30508		38.8416	0.25582										37.6278	0.30131		32.0212	0.20257
39.4774	0.34219		41.7316	0.28747										36.0094	0.29737		35.4314	0.25019
46.0088	0.37119		39.7086	0.27259										38.8994	0.30859		31.7322	0.25249
40.0554	0.35358		42.9454	0.26039										33.7552	0.28164		36.8764	0.18947
45.1996	0.3864		38.9572	0.25542										36.0094	0.31588		35.7782	0.34884
32.8882	0.31934		38.8416	0.28345										29.6514	0.25334		33.235	0.29035
38.4948	0.32997		39.9398	0.27628										41.616	0.27205		37.7434	0.33948
39.2462	0.34545		40.8646	0.25368										35.3736	0.31041		37.9168	0.30316
41.0958	0.35374		42.1362	0.34944										44.2748	0.2837		40.8646	0.30152
39.1884	0.35072		40.4022	0.2513										33.813	0.31898		37.5122	0.36817
39.7086	0.29522		39.7086	0.24361										37.1076	0.27722		40.0554	0.15864
32.0212	0.37432		40.5756	0.27365										35.547	0.29789		42.0206	0.32562
38.8994	0.37205		45.7776	0.28195										35.9516	0.32645		37.1654	0.21493
41.327	0.34219		40.2866	0.25044										39.015	0.29955		38.0324	0.21758
34.7956	0.3146		32.7726	0.32762										35.7782	0.31421		32.1368	0.22169
38.6104	0.35051		38.726	0.2871										34.4488	0.24873		33.2928	0.16497
32.8304	0.4095		43.8702	0.25674										39.3618	0.29863		36.2406	0.2286
45.7776	0.34127		36.4718	0.2439										40.2866	0.30774		43.061	0.36331
36.992	0.34621		34.8534	0.26223										43.35	0.29713		35.2002	0.22066
44.9106	0.39296		39.5352	0.24907										35.7782	0.31255		42.4252	0.26251
39.7664	0.34242		33.1772	0.23815										31.2698	0.28179		31.2698	0.21301
39.7664	0.35423		40.9224	0.24226										38.9572	0.31045		33.5818	0.25892
44.217	0.35175		42.1362	0.26387										39.4196	0.30032		31.9634	0.18754
34.5644	0.31584		34.7956	0.2659										41.3848	0.30818		33.0616	0.25711
42.0784	0.31343		37.6856	0.27459										36.5874	0.28344		36.4718	0.2548
39.593	0.35583		44.1014	0.25531										37.0498	0.30716		31.1542	0.27962
42.2518	0.37784		43.0032	0.24288										44.217	0.32149		32.3102	0.26539
45.2574	0.34586		36.0094	0.25244										42.0784	0.33109		35.547	0.23818
40.46	0.33399		36.6452	0.27921										37.9746	0.3282		32.5414	0.25865
40.9224	0.35277		37.1076	0.23204										41.1536	0.322		38.2636	0.07581
47.5694	0.35412		46.1244	0.29358										37.57	0.32523		31.5588	0.25281
36.8186	0.31143		38.6104	0.26671										31.6744	0.16381		39.5352	0.11404
38.8994	0.33498		37.281	0.32554										38.4948	0.30583		34.68	0.19941
44.3904	0.31575		43.2922	0.23941										39.882	0.30842		36.5874	0.23276
40.6912	0.33318		42.194	0.26225										36.125	0.27351		40.1132	0.30584
38.5526	0.35892		29.4202	0.25236										36.9342	0.27207		32.7148	0.19651
35.836	0.34328		32.0212	0.34052										35.9516	0.30181		38.6104	0.32884
38.3792	0.38884		40.3444	0.28752										43.5812	0.36557		29.7092	0.21018
41.2114	0.37289		39.882	0.25051										41.6738	0.37885		30.9808	0.17899
39.1884	0.2749		34.2176	0.21726										38.0324	0.26459		37.7434	0.29837
47.2804	0.36348		43.35	0.26191										37.2232	0.25355		32.7726	0.28272
38.5526	0.37513		45.8932	0.28565										37.3388	0.28505		40.2288	0.31557
32.0212	0.29873		41.8472	0.27086										39.4196	0.30553		33.4084	0.27478
35.8938	0.33517		39.1306	0.29082										40.6912	0.31483		35.6626	0.26308
37.9168	0.34196		35.6626	0.28803										34.2176	0.28794		35.6626	0.27194
44.4482	0.37272		29.9982	0.26584										28.2642	0.24354		29.0156	0.20521
37.2232	0.3065		40.9802	0.2787										37.4544	0.31486		28.9578	0.20066
38.0324	0.33844		39.4774	0.24741										38.2636	0.27184		41.905	0.20894
42.194	0.3801		45.084	0.29221										37.8012	0.306		28.4376	0.14815
47.3382	0.35375		41.038	0.25475										39.4196	0.30695		41.3848	0.29365
41.1536	0.36346		45.8354	0.30187										41.327	0.31094		35.0846	0.20731
38.5526	0.38024		43.5234	0.0651										31.1542	0.28089		36.9342	0.30358
44.217	0.30291		43.4656	0.24688										33.1194	0.26935		35.7204	0.30706
39.4196	0.35728		42.4252	0.27743										32.8304	0.28662		33.8708	0.23183
37.6856	0.32783		40.9224	0.3208										37.9746	0.26504		33.3506	0.26334
40.3444	0.32539		36.8764	0.29268										35.836	0.26483		37.3388	0.32639
39.7086	0.375		41.3848	0.26742										31.212	0.26023		35.7204	0.27311
32.7726	0.34519		46.529	0.2823										31.9634	0.15568		36.703	0.2944
39.3618	0.41434		36.992	0.29952										41.1536	0.35604		37.3966	0.25791
39.9976	0.3265		39.1884	0.2557										37.7434	0.29668		36.703	0.27225
39.9398	0.35116		43.5234	0.25547										33.6396	0.31742		41.616	0.23668
37.8012	0.39752		41.5004	0.27644										36.8764	0.33083		32.8882	0.22539
42.5986	0.36814		45.3152	0.2979										42.4252	0.3189		35.2002	0.29781
41.5004	0.39247		38.0902	0.28255										38.2058	0.31829		36.2406	0.25281
41.8472	0.33469		41.8472	0.27715										35.0268	0.31942		31.79	0.28466
40.46	0.31593		34.0442	0.2433										33.524	0.17243		35.4892	0.24936
38.6104	0.28803		37.6856	0.22485										41.8472	0.24815		33.7552	0.28097
33.1194	0.28643		40.171	0.27204										38.8994	0.30259		33.7552	0.28097
41.5582	0.32729		37.3966	0.28051										45.4886	0.27902		34.102	0.30113
40.749	0.34748		33.235	0.24657										33.5818	0.22856		32.1946	0.29994
44.1014	0.38949		34.2754	0.26475										33.813	0.30123		34.1598	0.0675
42.483	0.37944		49.13	0.23514										34.4488	0.28934		33.9286	0.26143
39.0728	0.39733		36.1828	0.27592										35.547	0.27139		39.4196	0.33058
41.6738	0.41824		47.9162	0.34428										34.102	0.30938		32.4836	0.21673
37.859	0.34798		38.4948	0.25199										45.084	0.32791		32.8304	0.17292
38.6104	0.34096		40.2288	0.26475										42.1362	0.33264		29.8826	0.10562
34.969	0.29883		42.4252	0.29556										36.703	0.27888		32.7148	0.26108
41.6738	0.33867		40.4022	0.23905										34.5066	0.24872		36.4718	0.20039
40.3444	0.32323		39.593	0.31715										33.1772	0.21388		35.3158	0.27589
40.171	0.35542		33.9286	0.24611										39.3618	0.33279		38.2636	0.27843
41.905	0.33286		39.7086	0.25672										43.35	0.31589		34.8534	0.25041
35.4892	0.34568		41.2114	0.26808										33.6974	0.22874		35.6626	0.18077
37.9746	0.34329		36.6452	0.23153										40.9224	0.30788		35.3736	0.25633
39.7086	0.39662		41.5004	0.26766										42.0206	0.31366		34.7956	0.24586
42.5986	0.37738		42.3674	0.25333										38.7838	0.32722		31.4432	0.23644
39.0728	0.30155		42.0784	0.25776										36.125	0.23637		40.6334	0.28958
35.547	0.28036		39.1884	0.2449										34.7956	0.32215		36.9342	0.16602
32.2524	0.30514		37.1654	0.27835										33.9286	0.26206		33.2928	0.25188
40.5178	0.37614		42.6564	0.24882										39.4196	0.28541		33.6974	0.28341
40.6334	0.3622		39.9398	0.25435										36.703	0.28163		34.7378	0.34542
41.4426	0.33642		34.1598	0.25956										40.2288	0.27993		30.2872	0.06899
37.8012	0.32766		51.2686	0.27661										33.9864	0.29151		29.0734	0.215
38.2636	0.36418		38.5526	0.2409										32.7148	0.19752		35.7204	0.34064
41.1536	0.31554		33.0616	0.22756										36.6452	0.31951		40.9802	0.31755
36.8186	0.38354		36.8764	0.23248										36.414	0.29239		37.5122	0.24245
38.0324	0.33599		41.7316	0.26917										33.235	0.2522		34.2176	0.20116
48.6676	0.37966		35.7782	0.26471										35.258	0.17293		34.391	0.21719
43.8702	0.40257		34.7378	0.26693										41.4426	0.26957		36.4718	0.18993
36.5296	0.31508		43.9858	0.28368										40.1132	0.32297		33.8708	0.26177
37.8012	0.34194		43.1188	0.26241										32.2524	0.29898		33.1772	0.19249
43.0032	0.33278		37.9746	0.30016										37.3388	0.28305		36.8186	0.32688
40.171	0.35189		40.171	0.24421										30.056	0.27409		39.8242	0.23938
38.0902	0.32822		32.8304	0.24764										33.8708	0.31775		42.2518	0.30134
38.0324	0.35436		38.4948	0.27258										36.8764	0.30256		38.3792	0.10277
44.0436	0.39311		34.5066	0.24189										33.1772	0.21249		44.4482	0.28732
43.1188	0.34908		34.7378	0.25344										44.217	0.31056		29.9404	0.19592
41.6738	0.33395		40.749	0.23381										39.9976	0.2935		33.6396	0.26782
43.5234	0.36868		40.9224	0.28638										40.5756	0.29972		29.8826	0.23651
41.6738	0.37078		40.9802	0.28402										39.9976	0.33927		39.2462	0.30042
41.616	0.35974		40.749	0.26532										36.125	0.2358		37.2232	0.22485
37.9746	0.35807		35.258	0.25468										32.4836	0.13309		35.4314	0.19596
42.0206	0.3259		38.2058	0.26807										38.6682	0.29284		36.5874	0.29925
38.726	0.30661		36.8764	0.33407										37.57	0.22566		28.611	0.1731
39.2462	0.30491		42.8876	0.27961										36.3562	0.25959		35.3736	0.20239
42.483	0.38333		38.4948	0.27348										29.0156	0.05062		38.726	0.31889
33.9864	0.30818		41.616	0.22508										39.2462	0.32162		42.6564	0.31589
39.593	0.33881		37.57	0.28008										43.6968	0.2989		34.7378	0.24631
35.1424	0.37042		33.813	0.10728										33.1194	0.27825		28.1486	0.19284
35.8938	0.35351		41.7894	0.26073										34.6222	0.21481		36.7608	0.29893
42.3674	0.38734		27.0504	0.23252										36.7608	0.30328		34.3332	0.24989
41.8472	0.32712		40.46	0.28587										37.1076	0.21452		42.0206	0.34913
42.6564	0.32982		30.9808	0.27538										32.079	0.3452		38.437	0.28464
44.3326	0.36978		39.015	0.26326										32.1946	0.28684		36.0094	0.22234
38.4948	0.35866		42.0206	0.05334										38.7838	0.28229		35.258	0.30712
44.0436	0.38649		37.3388	0.25417										33.1772	0.29961		32.7726	0.17343
40.2288	0.33663		45.1418	0.31411										34.1598	0.25056		29.8248	0.15257
35.3736	0.28768		29.3624	0.3355										33.9286	0.27217		38.726	0.30719
37.8012	0.33127		35.1424	0.25502										38.7838	0.31253		38.8994	0.26489
38.7838	0.35518		38.2636	0.25129										47.1648	0.33218		39.3618	0.27568
40.9802	0.30847		36.1828	0.28954										34.1598	0.28069		33.6974	0.19994
33.4084	0.32367		48.8988	0.28459										42.772	0.3256		33.1772	0.1767
39.015	0.33307		35.8938	0.25539										34.2176	0.25865		34.7378	0.31943
37.57	0.32631		36.2984	0.22397										33.5818	0.26429		34.4488	0.28037
45.7198	0.38028		37.859	0.26247										41.6738	0.3209		43.0032	0.31549
43.2922	0.31682		36.1828	0.19469										34.5066	0.30117		26.4724	0.16931
42.2518	0.33204		33.524	0.2633										26.3568	0.14268		36.703	0.22228
37.7434	0.38964		33.5818	0.30348										40.749	0.24261		42.3674	0.29729
35.3736	0.33017		29.1312	0.31058										28.322	0.1189		34.7956	0.31593
39.882	0.33925		39.7086	0.24755										31.4432	0.29117		37.859	0.20733
47.4538	0.34046		36.8186	0.2533										33.7552	0.3112		33.4662	0.34768
42.5986	0.3678		44.0436	0.26402										38.6682	0.28504		32.8882	0.33106
37.4544	0.31072		41.616	0.27216										45.6042	0.32227		32.657	0.17738
40.0554	0.35958		41.5004	0.26136										35.7204	0.24025		31.79	0.2016
43.2344	0.37055		29.1312	0.31058										39.5352	0.29293		40.6912	0.27526
38.7838	0.33866		37.281	0.33211										35.547	0.21174		40.8646	0.17483
37.9746	0.36523		42.772	0.27117										39.7086	0.32298		34.2754	0.19668
39.2462	0.35663		35.0846	0.23779										42.3674	0.31177		26.588	0.10734
37.4544	0.34073		38.148	0.27812										43.2344	0.28876		37.0498	0.17124
42.5986	0.35989		45.373	0.28578										40.4022	0.27726		34.391	0.18239
42.3096	0.31905		36.0094	0.28168										33.524	0.28497		39.593	0.34687
36.5874	0.374		36.5874	0.26387										35.547	0.23243		39.1884	0.21861
39.4774	0.36569		32.2524	0.21629										38.8994	0.28234		39.1884	0.21861
39.6508	0.32743		40.46	0.24046										40.2866	0.32109		29.9982	0.09844
35.7204	0.32177		41.7316	0.2707										35.3736	0.2704		32.0212	0.22454
39.4774	0.3552		40.46	0.26041										35.836	0.31042		33.3506	0.19059
39.304	0.3649		37.6278	0.24585										41.2114	0.32265		37.9168	0.25004
40.6334	0.3561		34.7378	0.30902										35.8938	0.26925		26.1256	0.1667
36.5296	0.30977		39.7664	0.24186										38.6682	0.33814		36.992	0.25266
35.258	0.3651		35.6048	0.2332										42.483	0.31903		35.8938	0.20095
40.749	0.37244		46.7602	0.27443										36.125	0.21808		42.8876	0.31501
42.772	0.33651		33.4084	0.25401										33.6974	0.27473		38.8994	0.30126
40.2866	0.36966		36.1828	0.28687										41.038	0.24053		32.3102	0.13718
42.483	0.33449		40.4022	0.30791										33.6396	0.30752		35.3736	0.27192
45.0262	0.33687		39.882	0.26005										33.1194	0.25769		44.1592	0.37817
43.4656	0.38518		43.9858	0.23838										35.0846	0.20418		33.235	0.17757
37.6278	0.35466		41.038	0.26065										37.8012	0.30807		35.836	0.26379
40.171	0.35586		36.0672	0.28723										33.6974	0.29995		33.1194	0.18139
42.483	0.36776		35.8938	0.23866										39.9976	0.33342		29.8826	0.23811
36.5874	0.32586		32.2524	0.29485										28.611	0.22022		29.6514	0.24807
43.1766	0.37874		38.3792	0.27157										31.8478	0.30021		33.4662	0.14902
41.0958	0.36643		42.5408	0.26435										41.038	0.34437		38.8994	0.2791
36.9342	0.36783		42.3096	0.26726										35.6048	0.22236		35.4314	0.27937
41.2692	0.35705		43.1188	0.27462										39.015	0.26986		36.5874	0.27919
36.125	0.32316		35.3158	0.25916										34.969	0.3262		36.6452	0.2454
40.6912	0.35304		36.9342	0.26275										36.9342	0.28966		39.3618	0.28226
47.107	0.36673		43.1188	0.26543										33.6396	0.20961		42.8876	0.19488
39.593	0.35301		35.6048	0.26195										42.5986	0.30837		40.6334	0.30105
45.4886	0.38663		40.6334	0.29697										39.9976	0.35374		37.9168	0.26398
43.35	0.33719		40.3444	0.28813										32.0212	0.28187		30.8652	0.22585
44.5638	0.35632		39.882	0.2665										40.171	0.29224		37.9746	0.28841
38.0324	0.33504		32.8304	0.22342										41.2114	0.30458		36.2406	0.29314
44.795	0.33445		37.3388	0.28999										41.616	0.32013		29.3046	0.26343
40.46	0.34554		41.7894	0.26107										32.8882	0.18169		33.9286	0.2448
38.5526	0.35726		38.6104	0.22975										41.2692	0.31387		35.1424	0.27416
37.5122	0.32979		24.3916	0.4269										37.5122	0.21444		34.0442	0.30077
37.8012	0.33779		33.6974	0.27312										37.57	0.21894		33.0616	0.24811
41.5004	0.38533		43.4078	0.25299										35.6626	0.32839		41.1536	0.32835
43.5812	0.37286		41.3848	0.2072										40.171	0.30178		37.8012	0.18108
39.4196	0.34742		35.1424	0.25506										51.6732	0.26337		36.7608	0.22917
41.5582	0.38021		37.8012	0.26079										37.1076	0.2688		39.5352	0.28261
41.6738	0.40164		39.882	0.28055										34.0442	0.27462		36.414	0.32716
37.8012	0.3203		32.2524	0.26039										31.3854	0.18651		47.4538	0.33158
37.6278	0.34459		35.0268	0.241										37.859	0.28994		35.7204	0.33004
41.4426	0.38826		39.9976	0.28581										35.1424	0.25039		33.4084	0.27034
38.9572	0.37793		36.7608	0.28134										38.148	0.26265		33.9286	0.02326
39.1306	0.35767		34.5066	0.24141										42.3096	0.32112		35.0268	0.19962
34.7378	0.35174		35.3736	0.25216										36.5296	0.29131		35.2002	0.22307
49.708	0.37076		45.8932	0.26554										39.1884	0.30253		33.9864	0.13844
43.061	0.38282		42.4252	0.30677										36.992	0.28008		41.0958	0.30019
41.905	0.36992		46.2978	0.24912										31.6744	0.25766		36.703	0.22922
45.8354	0.36817		47.107	0.29189										33.5818	0.2577		32.657	0.26294
35.0268	0.34171		45.7776	0.29999										37.57	0.29861		42.5986	0.32789
45.084	0.38894		40.8068	0.29339										31.6166	0.29462		41.2692	0.2695
35.3158	0.32132		40.749	0.27143										33.1772	0.29199		40.2866	0.35515
39.8242	0.31244		34.8534	0.27126										34.8534	0.30732		38.148	0.18518
40.8068	0.33497		40.9802	0.26255										35.6048	0.29612		36.5296	0.35637
31.3854	0.37235		39.4196	0.27254										33.1772	0.30079		38.8416	0.30382
41.0958	0.40315		35.6626	0.21761										39.7664	0.35369		34.4488	0.2933
43.4656	0.38217		29.3046	0.26213										37.8012	0.29682		35.1424	0.19003
45.2574	0.36771		45.8932	0.30333										35.3158	0.26785		29.1312	0.11584
40.46	0.37623		39.593	0.33636										33.2928	0.29909		32.079	0.11396
38.2058	0.32592		36.1828	0.26486										32.5992	0.22321		41.3848	0.30649
39.593	0.33815		33.9286	0.23306										35.3158	0.2704		33.8708	0.28342
37.9168	0.38752		36.3562	0.2587										40.46	0.34697		36.1828	0.17584
38.0902	0.30719		37.1654	0.24565										37.1076	0.20663		36.0672	0.22586
36.7608	0.34859		42.9454	0.26906										42.5986	0.31869		30.2872	0.2896
38.7838	0.27786		39.7664	0.28102										35.4314	0.32154		33.4662	0.20278
40.171	0.36085		40.46	0.27901										40.5756	0.291		39.4196	0.19113
41.3848	0.36677		38.5526	0.25329										37.859	0.25462		36.125	0.17882
40.0554	0.33605		43.1766	0.27671										39.4196	0.3027		27.9752	0.17835
38.4948	0.34417		37.1654	0.29134										35.2002	0.32172		29.3624	0.24688
42.6564	0.35344		35.2002	0.23816										34.7956	0.30833		36.4718	0.35142
37.1654	0.32407		39.3618	0.23744										36.2406	0.28939		34.5066	0.30965
36.703	0.35139		38.4948	0.23834										39.3618	0.3029		39.1306	0.31544
40.9802	0.30679		33.813	0.20427										39.7664	0.30446		36.992	0.31219
42.6564	0.36634		33.9286	0.23287										36.4718	0.21241		34.7956	0.20734
36.8186	0.32607		41.2114	0.28143										39.304	0.30431		34.1598	0.29134
40.5756	0.37293		35.547	0.26411										31.9634	0.2698		32.7148	0.17226
44.9106	0.36766		32.4836	0.28394										39.0728	0.32575		38.0324	0.27255
39.3618	0.40697		31.3276	0.26917										35.547	0.24905		31.0386	0.13076
39.1306	0.30257		47.1648	0.28037										32.8882	0.23716		31.8478	0.21784
38.8416	0.34591		36.1828	0.28069										38.9572	0.31115		35.6048	0.20733
39.4774	0.37696		36.5874	0.28393										36.0672	0.21959		37.57	0.27873
44.3904	0.34175		46.2978	0.23457										32.5414	0.26675		33.8708	0.20545
38.6104	0.3995		38.2058	0.26281										34.68	0.2616		42.194	0.29181
42.0784	0.32094		36.3562	0.2446										32.4258	0.30074		32.3102	0.22308
35.7204	0.27069		34.68	0.25692										39.8242	0.29649		36.2984	0.29262
36.992	0.37524		42.3096	0.29802										29.1312	0.24163		34.6222	0.31766
34.8534	0.32557		43.9858	0.29009										39.9976	0.31342		36.992	0.3249
39.9976	0.34127		27.6284	0.25769										41.2114	0.35265		40.3444	0.3262
42.1362	0.40838		43.1188	0.27346										31.3854	0.32339		33.1772	0.15891
39.1884	0.32011		40.46	0.24075										32.657	0.29174		34.1598	0.29363
39.015	0.3743		41.5582	0.23349										37.6856	0.32402		30.1138	0.19025
41.2114	0.35049		45.3152	0.23095										28.5532	0.11951		38.2058	0.19326
37.5122	0.37864		40.5178	0.23628										36.1828	0.33983		38.5526	0.2618
40.0554	0.34801		36.1828	0.27198										37.859	0.33207		43.061	0.30696
41.7316	0.32848		38.5526	0.24587										44.9684	0.34243		32.5414	0.28532
39.5352	0.3439		32.5992	0.26551										38.148	0.19154		38.4948	0.26767
40.4022	0.31061		35.1424	0.23367										44.1014	0.35032		39.5352	0.16412
41.905	0.37082		39.6508	0.29574										42.483	0.31515		40.8646	0.17991
38.2058	0.36079		40.5756	0.11658										35.6626	0.30069		35.4314	0.28502
40.2288	0.35576		38.4948	0.25435										37.0498	0.16673		40.171	0.26148
42.5408	0.34176		39.1306	0.27231										38.437	0.26656		36.1828	0.17423
42.483	0.34769		35.6626	0.28206										31.6166	0.26679		36.125	0.29423
41.2114	0.36831		41.5004	0.27577										31.8478	0.20598		36.8764	0.17691
42.5408	0.36413		46.8758	0.29936										35.836	0.24201		28.611	0.29789
48.8988	0.3623		32.2524	0.25046										38.4948	0.30638		32.5414	0.21509
36.0094	0.36617		40.5756	0.26795										30.923	0.19153		36.5874	0.31886
39.304	0.34991		42.8876	0.25399										38.3214	0.303		35.547	0.32914
35.3158	0.34064		40.0554	0.25295										39.9398	0.30709		39.7086	0.24378
37.7434	0.34404		42.0784	0.27896										48.263	0.31208		33.1194	0.2411
48.841	0.36752		33.0038	0.25345										36.414	0.26976		31.5588	0.21838
38.8416	0.36157		43.5234	0.25806										43.5234	0.33795		33.4084	0.173
35.2002	0.38393		44.1592	0.23909										42.8298	0.31159		33.6396	0.27722
33.1194	0.30752		44.795	0.26864										38.148	0.33731		37.281	0.29558
39.7664	0.33191		37.5122	0.28081										33.4084	0.24452		37.9168	0.28116
42.483	0.34252		29.3624	0.26263										37.2232	0.28928		33.2928	0.2561
39.6508	0.38847		34.102	0.25819										38.6682	0.21719		40.8068	0.32416
39.304	0.32926		36.3562	0.30435										36.125	0.24228		33.1194	0.28994
39.9398	0.36129		41.1536	0.22507										32.1946	0.25968		32.8882	0.21305
44.506	0.37204		40.8068	0.2589										37.7434	0.29539		33.0616	0.2083
46.0088	0.3514		43.35	0.26681										34.1598	0.24115		33.2928	0.26569
48.4942	0.37026		37.281	0.26754										38.2636	0.3221		32.2524	0.26546
39.4196	0.35878		36.0094	0.26248										36.0094	0.31855		39.882	0.27734
43.1766	0.38363		43.6968	0.26609										33.813	0.3455		39.304	0.32058
37.6278	0.34524		40.3444	0.26885										31.3854	0.18689		30.1138	0.20467
35.0268	0.39312		43.2344	0.28489										30.7496	0.26092		39.7086	0.17147
43.4078	0.4113		35.0846	0.25478										40.1132	0.31617		33.8708	0.32551
40.3444	0.3495		38.3214	0.30685										41.5004	0.32084		29.767	0.22098
34.7956	0.32555		30.9808	0.20602										41.327	0.28611		34.9112	0.30249
42.8876	0.33103		36.3562	0.26066										37.859	0.30385		38.2636	0.28819
36.0672	0.39952		47.0492	0.26408										38.148	0.30414		33.1772	0.17353
41.327	0.36446		44.506	0.26591										39.8242	0.32092		33.6396	0.2381
40.46	0.34325		43.7546	0.27039										39.9976	0.35503		34.7956	0.18814
35.547	0.4004		39.6508	0.27747										36.2984	0.32131		34.1598	0.19786
39.593	0.31724		38.5526	0.27595										39.8242	0.31828		37.8012	0.23965
35.7204	0.33475		39.7086	0.30995										34.68	0.30533		34.391	0.32719
45.373	0.3436		42.194	0.26484										46.4134	0.00746		34.969	0.18538
41.7316	0.32543		38.0324	0.19948										39.882	0.29965		37.0498	0.22858
41.8472	0.36266		43.8702	0.29033										34.102	0.20258		41.327	0.31179
36.9342	0.33551		40.8068	0.2719										39.015	0.31235		32.2524	0.20258
37.4544	0.35819		36.4718	0.27026										39.0728	0.28338		31.6166	0.26075
39.7664	0.32043		36.4718	0.25764										42.483	0.30853		42.5986	0.28204
38.0324	0.39517		34.3332	0.2518										43.1188	0.33045		28.4954	0.05975
35.9516	0.3206		42.1362	0.30274										39.882	0.30609		34.2754	0.29208
33.8708	0.33484		34.7956	0.24757										38.8416	0.32068		36.125	0.31002
41.7316	0.36082		41.905	0.23973										37.281	0.25519		36.9342	0.16461
42.7142	0.36021		44.0436	0.25432										39.9398	0.29657		32.1946	0.23277
36.3562	0.36595		41.6738	0.26687										39.0728	0.30195		38.3792	0.26836
41.6738	0.34044		31.5588	0.18992										42.194	0.32779		28.4376	0.22552
43.5234	0.39677		39.304	0.27702										36.4718	0.28141		37.9168	0.31106
35.0846	0.32422		34.102	0.14901										36.9342	0.32945		30.4606	0.16301
37.859	0.34688		40.749	0.29623										41.038	0.2789		35.4892	0.1609
38.437	0.42282		36.2984	0.20069										36.992	0.29817		37.7434	0.27884
39.7086	0.35001		37.0498	0.25175										44.4482	0.31058		35.4892	0.3274
36.703	0.32733		35.8938	0.31184										32.946	0.23433		37.5122	0.24033
37.9168	0.30976		36.2406	0.29047										41.038	0.32248		37.5122	0.24033
47.3382	0.33249		38.8994	0.25257										41.7316	0.28929		20.6924	0.143
42.3096	0.37732		41.327	0.29284										39.4196	0.30904		43.1188	0.18491
39.7664	0.33172		42.3096	0.27359										37.9746	0.26637		37.2232	0.24144
45.7776	0.36711		42.5986	0.25664										33.1772	0.28807		30.6918	0.16991
40.5756	0.31867		36.0672	0.33036										40.0554	0.31742		36.703	0.27675
37.8012	0.33482		46.24	0.2659										36.8764	0.3184		37.4544	0.16101
46.2978	0.34717		41.5004	0.24928										40.1132	0.28042		34.9112	0.13589
42.0784	0.36733		41.5582	0.27597										34.4488	0.2501		38.148	0.19012
40.4022	0.34561		39.8242	0.27532										38.9572	0.28128		32.368	0.35015
36.3562	0.35111		37.57	0.28264										37.8012	0.35094		34.0442	0.12684
39.304	0.3074		39.0728	0.2537										38.0324	0.21221		41.5582	0.10223
44.2748	0.36586		34.2176	0.25481										36.6452	0.33157		33.8708	0.25199
40.6334	0.30955		42.7142	0.27723										37.3388	0.28842		25.8944	0.01749
35.6626	0.29943		40.3444	0.22497										35.3158	0.28425		35.836	0.29985
43.9858	0.37803		36.8186	0.29936										32.7726	0.29266		32.7148	0.33045
42.5986	0.35476		34.0442	0.2532										33.3506	0.15305		32.8304	0.28146
38.0902	0.32049		40.6912	0.28715										33.1772	0.25848		31.501	0.32802
46.3556	0.37879		35.1424	0.26949										35.8938	0.29853		37.859	0.2922
38.437	0.34982		45.373	0.28629										41.6738	0.27122		43.8124	0.23269
42.9454	0.33689		35.258	0.25267										39.4774	0.34354		42.7142	0.25931
42.2518	0.36615		38.5526	0.2277										35.4314	0.32669		35.7782	0.19559
40.2866	0.34015		42.5986	0.18819										38.0902	0.33276		31.7322	0.33089
46.8758	0.36442		40.5178	0.25446										40.9802	0.26373		32.5992	0.17261
35.7204	0.27977		33.2928	0.30893										43.2922	0.31528		33.6974	0.28882
38.8416	0.32929		40.3444	0.27934										30.4606	0.1659		31.6166	0.17537
40.8646	0.35275		37.1654	0.25053										37.57	0.28291		38.8416	0.27703
41.7316	0.35232		36.0672	0.27733										39.3618	0.29146		41.1536	0.28319
38.3214	0.35615		36.3562	0.26101										42.5986	0.31215		33.6974	0.22707
37.6856	0.36395		36.4718	0.26865										35.0846	0.25471		33.1194	0.18764
42.1362	0.37079		37.3388	0.26501										35.1424	0.29086		33.235	0.33408
45.662	0.36842		34.7956	0.27676										38.0902	0.29917		34.1598	0.17392
42.483	0.31448		43.1188	0.2883										36.4718	0.2461		36.9342	0.20608
38.7838	0.36811		42.5408	0.27876										26.4146	0.23231		34.4488	0.25342
43.8124	0.34461		47.2226	0.23982										35.2002	0.31947		35.6048	0.28529
35.6048	0.34884		37.6278	0.27272										39.882	0.29862		32.2524	0.29168
36.3562	0.33362		44.3904	0.26997										36.0094	0.3549		35.6626	0.21003
39.3618	0.38855		40.9224	0.2531										37.8012	0.25692		40.2288	0.28002
37.859	0.30953		44.7372	0.26954										38.8416	0.3114		33.9864	0.27922
39.882	0.37516		43.4656	0.25969										42.8876	0.33054		30.6918	0.28997
33.1772	0.27312		39.4196	0.26353										39.593	0.34315		36.3562	0.309
38.437	0.34408		37.7434	0.27919										38.7838	0.30849		40.46	0.29404
40.46	0.35086		38.2636	0.22864										34.7378	0.30323		35.4892	0.2215
38.3214	0.30971		41.327	0.24047										37.6278	0.32893		35.1424	0.29083
39.9398	0.31548		39.8242	0.30525										34.2176	0.28065		32.079	0.29197
38.3214	0.3308		37.3388	0.22033										27.2816	0.04296		39.1306	0.2936
37.2232	0.39106		30.8074	0.21093										35.3736	0.25472		44.217	0.30335
33.2928	0.29142		38.726	0.2985										41.6738	0.35992		42.6564	0.30892
34.1598	0.35955		37.8012	0.27327										32.8304	0.21207		34.5066	0.23547
39.5352	0.35539		37.281	0.25015										33.6974	0.30597		33.1194	0.19571
40.6912	0.33625		35.1424	0.25815										30.4028	0.19763		37.7434	0.26771
48.2052	0.37483		42.3674	0.26614										38.6682	0.27968		38.0324	0.31751
42.1362	0.4086		35.7782	0.29929										38.437	0.3019		39.1306	0.27566
38.6682	0.34836		41.5582	0.20013										38.0902	0.35599		40.0554	0.2412
34.8534	0.34442		32.7726	0.23291										33.7552	0.24179		27.6862	0.24748
44.9684	0.36931		33.9286	0.31076										33.7552	0.24635		36.3562	0.19138
40.749	0.35501		36.3562	0.26372										28.611	0.28807		38.8994	0.11938
36.1828	0.36487		36.8764	0.25976										41.038	0.28414		42.2518	0.30356
41.0958	0.33485		36.2406	0.26909										32.5992	0.28727		36.414	0.34067
43.928	0.38827		46.0088	0.17279										34.7956	0.30077		34.3332	0.19383
40.8068	0.40428		44.2748	0.27092										37.859	0.36631		37.8012	0.25562
35.3158	0.32593		35.3158	0.26584										39.5352	0.29224		31.9056	0.252
37.6278	0.32451		40.6334	0.23266										35.1424	0.18627		38.3214	0.28729
40.749	0.32575		38.8416	0.26501										36.9342	0.17965		35.4892	0.26358
40.6912	0.31487		41.905	0.25202										33.8708	0.25802		35.836	0.18357
40.2288	0.35751		42.7142	0.26881										35.836	0.33617		34.102	0.20175
41.8472	0.35167		41.327	0.26461										40.4022	0.30197		37.9746	0.20952
37.1076	0.34608		37.1076	0.13668										41.2114	0.28554		25.3742	0.1344
36.3562	0.32978		39.015	0.24138										36.1828	0.25618		30.5184	0.27359
42.483	0.36147		38.2058	0.28541										33.8708	0.28771		40.46	0.27411
41.7894	0.36156		43.639	0.29059										36.2984	0.26322		34.9112	0.11621
38.726	0.35532		42.8298	0.28067										41.3848	0.28018		34.2176	0.26116
31.9056	0.367		32.4836	0.18092										33.1772	0.19088		31.7322	0.25907
43.9858	0.33275		40.749	0.21616										41.3848	0.26642		32.1368	0.17625
42.5408	0.35402		35.9516	0.24485										35.6626	0.28588		42.9454	0.33753
39.304	0.36466		38.6104	0.19839										54.7944	0.33652		28.322	0.17347
34.2176	0.25942		38.9572	0.29351										37.3388	0.26831		37.1654	0.31021
37.859	0.37006		37.9746	0.33901										33.1194	0.19615		34.7378	0.30953
38.148	0.32944		37.6856	0.22389										38.6682	0.32031		35.7204	0.19801
39.1884	0.34119		32.368	0.27064										43.6968	0.3184		35.836	0.29684
43.9858	0.36221		39.7664	0.28963										35.7204	0.23665		34.7378	0.24509
45.0262	0.36348		43.2344	0.26598										36.5296	0.30407		40.6334	0.24322
40.2866	0.34238		39.4774	0.28127										35.547	0.29522		30.5184	0.18843
45.3152	0.36793		42.3674	0.30534										35.6048	0.28798		32.7148	0.27768
44.8528	0.36306		38.6104	0.29098										33.4084	0.234		36.992	0.32327
36.7608	0.34749		38.7838	0.27012										33.6396	0.27056		39.1306	0.33942
42.483	0.38698		43.7546	0.25814										36.0672	0.27734		34.5644	0.25896
41.905	0.37907		40.5178	0.28949										33.235	0.23312		31.8478	0.16247
33.6396	0.32463		43.7546	0.2912										38.7838	0.31573		38.6104	0.29978
39.9398	0.33026		36.0672	0.25549										44.3326	0.32077		39.9398	0.16941
35.836	0.4165		43.1188	0.27027										29.5358	0.29466		32.1368	0.25196
39.304	0.32802		36.2984	0.27423										36.8186	0.25711		36.703	0.23771
38.9572	0.33301		39.593	0.24457										38.437	0.26703		37.3966	0.30434
41.2114	0.3559		38.8416	0.23947										42.0784	0.37952		35.7204	0.07634
37.1654	0.33837		39.7086	0.20967										32.946	0.2167		50.1126	0.26029
44.2748	0.37765		43.7546	0.27403										37.3388	0.3047		31.1542	0.16501
39.9976	0.35297		35.4892	0.2612										34.5066	0.31061		27.9174	0.24574
38.3792	0.24606		37.3966	0.26617										36.5874	0.3428		32.7148	0.26746
45.1996	0.34046		33.9286	0.24027										36.9342	0.34828		36.0094	0.24991
42.6564	0.34465		30.345	0.23065										33.2928	0.22063		35.6626	0.26856
36.8764	0.3389		35.1424	0.28871										35.8938	0.26227		30.6918	0.25634
40.46	0.34285		34.2176	0.24585										37.5122	0.27704		50.0548	0.27098
39.0728	0.33266		40.46	0.25343										37.3966	0.30113		30.634	0.27267
37.6856	0.36763		35.8938	0.26762										40.46	0.31429		29.9404	0.30373
40.9802	0.33942		34.102	0.28409										30.345	0.26171		35.547	0.27689
41.038	0.34011		40.8068	0.24223										39.9976	0.3066		35.7204	0.25986
33.4662	0.28745		38.437	0.26518										42.0206	0.31209		38.437	0.322
41.5004	0.36407		35.547	0.25567										42.3674	0.31656		33.0038	0.18826
38.6682	0.33692		34.5066	0.23998										39.1306	0.27523		29.478	0.25555
44.6216	0.38375		37.3388	0.16183										30.4028	0.26425		36.125	0.15922
38.8416	0.38567		39.1306	0.27162										38.3214	0.24897		36.703	0.2276
37.9746	0.3396		41.905	0.35										28.5532	0.18238		34.2754	0.29139
40.6912	0.34433		37.4544	0.24275										37.859	0.30738		34.68	0.16315
37.2232	0.32453		45.4886	0.27599										35.6048	0.3065		32.079	0.22533
39.3618	0.36527		39.4196	0.24798										36.9342	0.3321		31.501	0.23347
40.5178	0.37725		28.8422	0.29206										33.9864	0.30207		34.2176	0.22269
39.4774	0.40619		34.6222	0.25255										38.9572	0.30851		38.8416	0.31153
34.6222	0.3228		37.0498	0.27982										41.2692	0.32348		37.9746	0.30556
37.57	0.31072		42.0784	0.30847										30.4606	0.18666		41.4426	0.29991
34.2176	0.34366		39.4196	0.27783										35.0268	0.28016		32.4836	0.2043
39.015	0.35707		33.235	0.26602										36.2406	0.29014		38.726	0.2909
38.6682	0.32427		47.396	0.27053										36.992	0.29196		35.8938	0.30188
45.1418	0.33921		33.4662	0.33536										33.3506	0.29288		32.0212	0.13814
41.1536	0.32774		49.5924	0.25977										35.6048	0.31311		36.7608	0.18898
38.8416	0.37015		39.304	0.28091										39.9976	0.29531		33.6974	0.28577
38.5526	0.33855		44.8528	0.24139										44.5638	0.31891		37.9746	0.1907
39.304	0.30237		39.9398	0.30471										33.0616	0.3205		40.6334	0.27569
37.1654	0.32264		45.5464	0.27983										38.4948	0.1504		38.8994	0.21707
47.7428	0.35907		47.2804	0.22312										37.3388	0.30985		37.2232	0.05625
38.2636	0.34912		42.2518	0.26216										38.2636	0.25438		34.7956	0.26783
44.7372	0.34416		36.3562	0.24727										39.1306	0.24394		35.6626	0.30716
40.6912	0.34992		37.9746	0.22188										42.8298	0.3251		37.9746	0.32908
34.6222	0.33617		32.0212	0.23272										38.437	0.27774		30.5184	0.20882
36.5874	0.38066		32.5992	0.24505										30.345	0.20176		41.9628	0.29462
43.2344	0.36358		33.6396	0.26359										32.368	0.28255		33.6974	0.21549
36.4718	0.34717		48.263	0.27284										35.7782	0.30978		32.1368	0.29569
31.8478	0.35085		41.6738	0.31076										34.7378	0.31091		38.148	0.22766
44.3904	0.37875		41.2692	0.2973										37.281	0.34071		39.8242	0.25061
47.396	0.34847		34.6222	0.29758										30.7496	0.29736		40.749	0.29879
39.2462	0.32449		38.437	0.2362										39.5352	0.2636		34.5066	0.30132
36.3562	0.35143		34.3332	0.26221										35.547	0.31351		35.8938	0.28666
40.2866	0.29153		36.2984	0.26529										39.015	0.29679		34.6222	0.23464
34.7378	0.36841		36.6452	0.24403										30.1716	0.25866		36.414	0.27304
43.6968	0.36552		47.8006	0.21632										44.7372	0.28304		41.2114	0.30916
45.4308	0.36126		36.3562	0.24643										34.5644	0.30555		32.946	0.2285
39.8242	0.35206		33.9864	0.26813										33.813	0.29661		31.8478	0.24222
35.0268	0.34266		36.9342	0.28252										44.2748	0.33562		35.1424	0.26778
32.8304	0.34432		42.483	0.24952										40.5178	0.30605		39.5352	0.29802
44.6216	0.3321		37.3966	0.2738										36.6452	0.28276		40.9224	0.3211
34.3332	0.30667		42.9454	0.25732										32.1946	0.27428		34.4488	0.3173
33.9286	0.31974		32.8882	0.30686										39.015	0.29656		36.703	0.13877
41.5582	0.36917		42.4252	0.26228										34.8534	0.30295		31.2698	0.33735
41.2692	0.3464		37.4544	0.24134										35.6626	0.2587		33.1194	0.26062
44.2748	0.3567		36.8186	0.27449										42.4252	0.32403		34.391	0.23346
44.9684	0.33964		38.6104	0.2732										52.0778	0.18125		34.391	0.14797
37.57	0.36617		41.6738	0.29192										29.5358	0.26343		36.8186	0.17419
39.304	0.35342		39.5352	0.29056										31.3276	0.29185		41.7316	0.29566
38.4948	0.34		39.5352	0.2255										36.8186	0.27636		30.8074	0.23065
38.0324	0.37459		30.2294	0.23562										42.6564	0.32438		38.6104	0.23567
46.4712	0.38292		40.4022	0.25545										38.2058	0.27121		39.882	0.28191
43.8124	0.37153		38.7838	0.27425										42.0206	0.32515		37.3966	0.29726
42.1362	0.3532		41.6738	0.31136										29.8248	0.29543		45.1418	0.30035
37.6278	0.35008		40.749	0.24137										36.703	0.19749		53.9274	0.30396
36.0094	0.34984		38.726	0.28413										37.7434	0.29815		37.859	0.33231
36.8186	0.36973		36.8186	0.25593										33.1772	0.29295		37.9746	0.27862
36.0672	0.33264		37.859	0.29561										36.414	0.32091		39.1884	0.30137
35.3736	0.36427		32.3102	0.27576										39.3618	0.31806		37.3966	0.28008
39.0728	0.35912		43.0032	0.2535										32.7148	0.35737		43.5234	0.37719
39.882	0.31845		39.3618	0.23929										39.0728	0.31452		34.0442	0.23336
37.8012	0.2924		32.4258	0.23165										33.3506	0.34304		37.3388	0.32447
46.24	0.407		37.9746	0.23357										34.0442	0.21274		35.4892	0.32153
43.35	0.33061		39.6508	0.24										35.7204	0.29398		38.148	0.26457
41.2692	0.37427		34.7378	0.25418										39.7086	0.30344		36.414	0.27715
37.6856	0.3436		38.2058	0.27786										40.46	0.34234		29.9982	0.17396
37.57	0.31381		36.0672	0.29506										33.3506	0.29472		33.0038	0.2298
42.194	0.3491		38.0324	0.26182										33.5818	0.26746		36.703	0.28699
42.0784	0.31282		36.9342	0.25833										31.79	0.28836		37.2232	0.26803
36.3562	0.27989		35.2002	0.2671										33.2928	0.21273		36.703	0.2008
45.7776	0.3389		39.015	0.24223										34.6222	0.26102		34.5066	0.24096
40.5178	0.3523		36.8186	0.25147										43.4656	0.29219		30.056	0.24743
44.5638	0.33689		48.3208	0.28167										39.8242	0.30857		43.5234	0.25697
34.7378	0.37662		30.923	0.27362										40.5756	0.30118		32.3102	0.25565
45.7776	0.35461		36.5874	0.22006										34.2176	0.1191		38.726	0.24665
42.3096	0.36309		40.9802	0.25278										39.8242	0.23751		39.0728	0.28574
41.905	0.33774		40.3444	0.24351										36.703	0.33089		36.125	0.27878
41.2692	0.34272		36.5874	0.24808										42.5986	0.32731		36.992	0.15926
37.57	0.36451		31.6744	0.29841										36.6452	0.31073		31.5588	0.15514
40.171	0.32966		33.0038	0.2367										39.1306	0.32632		37.8012	0.28861
46.1822	0.35916		36.8764	0.25045										38.0324	0.2763		32.8882	0.16044
36.2984	0.35575		37.9168	0.26172										41.6738	0.32485		32.946	0.30474
40.2288	0.33341		39.7086	0.25118										35.6048	0.1928		32.8304	0.23607
42.194	0.36241		42.0206	0.30778										42.4252	0.34157		32.8882	0.23145
44.7372	0.41785		33.0616	0.19332										38.2058	0.29444		31.9634	0.24709
41.7894	0.30222		33.0038	0.27903										41.9628	0.31157		33.1772	0.21809
42.0784	0.36622		42.483	0.24744										35.0268	0.18354		38.3792	0.30481
39.3618	0.33334		43.2344	0.28472										37.4544	0.31306		38.2636	0.32432
44.9106	0.38682		34.5066	0.25321										40.749	0.29812		44.1014	0.26776
41.6738	0.376		43.061	0.28566										37.1076	0.36572		36.8186	0.33205
42.772	0.3748		38.2636	0.28283										32.0212	0.24676		38.4948	0.25681
49.419	0.36177		31.9056	0.21769										37.8012	0.25369		32.5414	0.30063
37.1076	0.3846		34.4488	0.2723										41.4426	0.30837		34.9112	0.33419
41.7894	0.3702		33.7552	0.14183										36.8186	0.31972		34.7378	0.29061
40.2288	0.34822		38.2636	0.27444										37.3388	0.25482		35.4314	0.22433
40.3444	0.35278		43.4078	0.2861										33.9286	0.20077		36.703	0.31886
48.1474	0.38217		38.726	0.25564										29.9982	0.19933		36.0672	0.16878
39.593	0.38876		42.7142	0.2876										34.5066	0.32817		37.1076	0.25167
43.5234	0.37228		43.5234	0.27412										35.3158	0.27519		38.4948	0.27246
34.7378	0.32424		39.882	0.23557										35.0268	0.33965		38.6682	0.28558
40.8646	0.38865		37.1076	0.26647										41.038	0.24461		34.7956	0.27905
44.795	0.36423		39.882	0.33829										33.1194	0.31676		37.2232	0.31522
36.992	0.32644		46.7024	0.27619										33.5818	0.25055		38.437	0.28053
40.9224	0.42423		42.8876	0.30605										35.258	0.29865		36.3562	0.29622
42.8298	0.38375		35.0846	0.25146										38.7838	0.25031		32.657	0.23307
38.9572	0.37343		48.4942	0.2724										35.4892	0.34752		40.9802	0.23948
35.2002	0.35949		37.8012	0.27315										40.9802	0.28676		41.038	0.27277
33.524	0.32245		31.2698	0.32714										38.2058	0.31141		32.5992	0.12692
41.8472	0.35428		37.7434	0.25047										46.24	0.32298		30.4606	0.24672
37.6278	0.32482		32.7726	0.18477										34.7378	0.30248		29.3046	0.17013
35.4314	0.36267		39.7664	0.29908										38.4948	0.31357		35.0846	0.30234
34.8534	0.2785		32.7726	0.27045										42.8876	0.34229		35.4892	0.19319
45.7776	0.35995		32.5414	0.20617										29.8826	0.17243		39.593	0.15822
35.3158	0.28976		35.8938	0.27796										35.0268	0.30472		37.57	0.29522
43.2344	0.38153		35.8938	0.22175										39.1306	0.32335		36.5874	0.16969
38.0902	0.39825		45.1418	0.30252										40.2288	0.26064		41.7316	0.32431
41.2692	0.34753		47.0492	0.24014										32.7148	0.35029		28.9	0.18759
42.194	0.35866		45.373	0.2557										38.8416	0.29038		34.5066	0.30173
38.8994	0.34742		38.3792	0.27789										41.7316	0.31531		34.9112	0.25501
39.015	0.36326		43.2344	0.26924										33.7552	0.35036		36.8764	0.28727
41.0958	0.34319		37.9168	0.33049										39.6508	0.25492		33.9286	0.25796
42.772	0.32927		32.368	0.29143										39.6508	0.32138		36.125	0.3074
38.9572	0.3546		30.345	0.20943										33.5818	0.25255		36.8764	0.22099
40.8068	0.38547		36.4718	0.21644										39.0728	0.33244		44.0436	0.28211
42.3096	0.36692		41.0958	0.27111										32.0212	0.2261		37.3388	0.25695
37.7434	0.39816		31.1542	0.26387										39.1884	0.31143		37.2232	0.31414
37.8012	0.34494		36.2984	0.26182										40.749	0.30925		32.5992	0.28728
38.7838	0.332		37.6856	0.23252										33.9864	0.19699		33.235	0.35004
39.593	0.35588		42.3674	0.27387										29.6514	0.31914		37.1654	0.28498
39.7664	0.41145		40.6912	0.26809										36.4718	0.27974		29.9982	0.24884
44.1592	0.3702		42.6564	0.29841										36.8764	0.28346		32.7148	0.29505
41.2692	0.39998		39.0728	0.22164										42.4252	0.30166		35.6048	0.31059
43.8702	0.34969		39.9398	0.25076										39.304	0.31402		33.9864	0.32295
38.9572	0.35645		41.7894	0.26009										38.148	0.28073		28.611	0.24539
40.4022	0.38106		36.5874	0.26518										35.0846	0.32531		34.6222	0.17226
38.2058	0.34764		41.2692	0.19555										32.0212	0.19816		32.079	0.25134
38.0902	0.34266		35.547	0.2399										46.7024	0.33382		31.8478	0.31703
47.1648	0.35651		34.2176	0.26401										43.061	0.30865		38.9572	0.26447
37.0498	0.33405		41.5004	0.0824										39.304	0.31466		38.3214	0.271
35.0846	0.29383		39.1884	0.3122										33.6974	0.28884		25.8944	0.02183
38.726	0.30217		43.0032	0.19303										35.7204	0.33707		40.9802	0.17655
34.6222	0.30084		38.437	0.27149										33.4084	0.29003		37.5122	0.18028
42.483	0.3755		37.8012	0.233										33.813	0.23944		41.038	0.29174
33.1772	0.35376		41.1536	0.25787										34.8534	0.30067		33.235	0.23793
34.5066	0.30456		39.7086	0.25233										37.3966	0.30082		32.4836	0.18725
39.1306	0.41582		29.3046	0.2487										40.5756	0.30771		40.749	0.27974
41.3848	0.35265		35.0268	0.30541										34.9112	0.23594		32.2524	0.18737
38.9572	0.34019		36.2984	0.21838										36.7608	0.31364		40.0554	0.30956
41.6738	0.31133		37.57	0.26776										43.061	0.33377		39.304	0.2528
45.1996	0.39334		25.143	0.2613										40.171	0.34407		26.5302	0.19444
33.813	0.30643		40.6334	0.32836										35.0268	0.20725		39.9398	0.31608
34.969	0.3213		40.9802	0.25959										39.304	0.33165		33.1772	0.22627
35.0268	0.35215		40.8646	0.25635										37.5122	0.30648		33.5818	0.20428
45.3152	0.36054		43.1188	0.23982										38.2058	0.28041		34.5644	0.25556
44.8528	0.36926		38.2058	0.27969										37.57	0.30078		38.3792	0.35703
44.4482	0.33844		35.547	0.26422										34.7956	0.24469		27.9174	0.0542
37.859	0.35674		43.2922	0.26732										36.125	0.3142		37.7434	0.31124
39.015	0.34135		32.1946	0.25233										30.1138	0.26192		36.8186	0.17259
36.8764	0.37217		39.6508	0.27981										36.1828	0.24006		35.6626	0.20187
35.2002	0.33433		34.7956	0.25412										33.2928	0.3217		33.9864	0.29683
41.7894	0.36253		47.3382	0.28316										37.9168	0.30674		37.1076	0.26331
39.7664	0.3807		43.35	0.27942										34.8534	0.30218		39.593	0.28779
35.258	0.3533		42.0206	0.24549										37.8012	0.29779		39.9976	0.09523
37.281	0.32151		39.2462	0.28491										35.0268	0.23115		39.4774	0.23018
33.4084	0.30305		29.0156	0.30131										34.2176	0.25999		28.7266	0.1486
44.8528	0.38241		39.8242	0.29806										35.1424	0.22072		34.8534	0.26733
42.772	0.36413		38.2636	0.25202										38.8994	0.29892		33.9286	0.23853
47.6272	0.35701		42.5986	0.27011										39.7086	0.25583		37.859	0.29534
35.3736	0.35934		26.9926	0.22058										39.7086	0.25583		39.4774	0.28258
37.3388	0.34868		44.6216	0.26571										37.0498	0.31019		35.547	0.25158
35.2002	0.39021		41.0958	0.25828										38.8416	0.34504		33.524	0.25987
39.015	0.33792		41.9628	0.28148										35.9516	0.26854		34.969	0.25164
41.5582	0.32373		40.749	0.28144										39.593	0.31435		35.836	0.25482
44.6794	0.38639		41.616	0.28636										34.2754	0.2865		37.7434	0.19291
40.8068	0.38217		39.9398	0.27587										42.0784	0.32619		35.1424	0.30623
35.836	0.37125		33.4084	0.23845										31.8478	0.19511		33.524	0.16846
44.6794	0.42484		38.3214	0.26675										38.3792	0.29714		39.1306	0.27617
32.3102	0.34796		36.0672	0.22584										34.68	0.32182		38.3792	0.28858
40.5178	0.37955		31.4432	0.20946										30.056	0.2155		32.4258	0.18818
41.1536	0.37053		45.7776	0.28481										40.2288	0.2956		37.3388	0.22736
37.281	0.33105		39.593	0.27531										36.414	0.30973		29.3624	0.27019
38.726	0.34443		30.056	0.27176										41.038	0.30792		32.4258	0.15911
41.3848	0.35127		42.194	0.22203										38.0324	0.32735		38.8416	0.28881
34.2754	0.2929		32.7148	0.21982										35.2002	0.2161		36.0672	0.19079
41.5582	0.3015		38.437	0.27668										38.2636	0.29703		35.6048	0.30026
38.5526	0.34654		34.8534	0.26269										40.4022	0.26171		35.8938	0.18947
39.9976	0.35696		38.0902	0.28832										40.3444	0.32503		38.8994	0.28978
39.9976	0.3275		44.6216	0.26808										36.8186	0.2963		33.235	0.21813
38.3214	0.32786		42.5408	0.27838										37.9168	0.28421		38.7838	0.09472
36.8186	0.36424		41.3848	0.22443										32.8882	0.30623		34.2754	0.35128
38.9572	0.38248		37.1654	0.25547										38.0902	0.25002		32.5992	0.22605
41.2114	0.35564		35.1424	0.1908										37.9746	0.26737		37.6856	0.28067
35.3736	0.33688		34.2176	0.21383										38.148	0.30562		36.1828	0.28207
43.8702	0.36122		35.2002	0.28038										33.0038	0.35059		36.3562	0.31934
40.9224	0.37838		38.0902	0.28371										35.7204	0.31503		40.749	0.33403
39.7086	0.37563		33.8708	0.25028										34.102	0.18893		37.3388	0.29072
43.5812	0.35242		38.6682	0.30862										32.5414	0.26779		33.0616	0.2718
40.749	0.33277		41.0958	0.27868										33.3506	0.29604		32.3102	0.30288
38.5526	0.30462		34.969	0.22326										37.1076	0.3078		34.6222	0.27887
39.3618	0.30703		41.038	0.25164										30.2872	0.26751		36.0094	0.29003
39.015	0.37423		45.373	0.27159										41.2114	0.33494		34.4488	0.31643
44.3904	0.38855		39.2462	0.26942										32.2524	0.16423		32.0212	0.25676
40.9224	0.37065		43.1766	0.24854										37.8012	0.30585		37.3966	0.32958
43.35	0.33641		37.3388	0.25272										31.3276	0.25072		32.946	0.25919
41.2692	0.3046		41.7894	0.28358										41.905	0.34033		35.6048	0.30612
44.1014	0.38546		40.3444	0.25706										44.795	0.33637		34.68	0.31898
44.2748	0.37782		35.7204	0.27024										35.6626	0.28174		36.7608	0.05798
42.8876	0.38122		42.8298	0.25124										37.5122	0.27799		35.4314	0.30819
44.0436	0.34467		36.703	0.28089										37.1076	0.29876		29.478	0.16736
39.2462	0.35567		42.6564	0.25621										39.593	0.29612		38.0902	0.19267
39.593	0.35067		37.5122	0.26563										41.905	0.34032		38.2058	0.30928
39.2462	0.38442		34.9112	0.23396										39.6508	0.22217		45.6042	0.2468
43.35	0.37323		38.0902	0.27013										36.1828	0.30219		32.5992	0.32257
40.749	0.34365		38.0902	0.27413										31.9056	0.2011		30.634	0.17044
43.9858	0.34523		44.0436	0.26048										34.391	0.30325		27.5706	0.00998
42.194	0.35752		35.547	0.26702										36.3562	0.17936		30.2872	0.26071
45.084	0.37546		33.9864	0.25738										40.5178	0.34269		31.501	0.33483
34.0442	0.3092		34.1598	0.25568										33.9864	0.21831		35.7204	0.26482
40.9802	0.34937		40.3444	0.24763										25.721	0.04859		36.2984	0.22886
45.1996	0.3723		42.8876	0.27836										38.726	0.32965		31.0386	0.24329
37.6278	0.3572		38.9572	0.27745										35.3736	0.30495		36.8764	0.26816
43.6968	0.35108		36.2406	0.25579										29.2468	0.24664		35.4314	0.33487
41.5582	0.38888		42.0784	0.26762										48.8988	0.24545		36.7608	0.31517
45.0262	0.36805		34.4488	0.3008										42.0784	0.30189		35.6048	0.24037
46.818	0.38774		40.3444	0.27065										34.6222	0.17575		37.1654	0.16191
38.0902	0.33825		35.8938	0.26352										34.4488	0.31636		37.6856	0.21036
36.2984	0.31863		34.969	0.27314										35.3736	0.32447		33.235	0.10827
41.0958	0.34562		32.5992	0.28561										41.0958	0.30942		31.4432	0.26079
39.0728	0.35912		38.437	0.27224										37.3966	0.30091		39.7086	0.30061
42.4252	0.34266		39.304	0.29177										44.1592	0.29996		26.588	0.22481
41.0958	0.37316		39.593	0.23727										32.8882	0.24348		40.8068	0.37704
38.0902	0.35509		41.3848	0.27073										38.8416	0.29077		39.8242	0.30808
39.6508	0.35007		45.373	0.29733										35.8938	0.26424		44.7372	0.2971
41.7894	0.3578		36.2406	0.27305										33.4662	0.29123		41.6738	0.16045
36.5874	0.39941		37.6856	0.28554										35.7204	0.2318		30.7496	0.22843
38.5526	0.31395		38.148	0.26484										34.2754	0.26583		27.8596	0.18426
40.1132	0.33944		32.946	0.18187										38.0902	0.32733		35.9516	0.29915
42.194	0.37714		37.57	0.27039										43.4656	0.28789		37.4544	0.2802
38.8994	0.40213		39.882	0.26022										33.1194	0.26157		34.9112	0.15373
37.6278	0.36304		36.2406	0.19116										37.3966	0.32109		30.1138	0.18452
48.9566	0.34229		46.1244	0.28883										38.9572	0.24501		32.368	0.13991
40.2288	0.31358		45.662	0.24773										40.3444	0.3539		26.6458	0.12729
40.6334	0.30391		37.859	0.28371										38.8994	0.3498		37.5122	0.25278
42.3096	0.38433		39.4774	0.24967										37.6278	0.28616		38.8416	0.32129
41.7316	0.38992		33.4084	0.27832										43.061	0.31676		29.2468	0.14593
50.9218	0.38197		44.3904	0.28513										43.7546	0.29529		31.4432	0.19445
41.038	0.35879		24.0448	0.38805										33.5818	0.32008		34.9112	0.30678
41.2114	0.35075		37.5122	0.26625										36.414	0.33053		31.212	0.17943
41.905	0.36221		46.9336	0.30791										36.5296	0.22674		34.0442	0.29103
34.2176	0.29067		35.0268	0.22697										38.2636	0.25641		36.414	0.20085
38.0902	0.33707		39.4196	0.19442										33.5818	0.25047		36.9342	0.28669
30.8074	0.36814		36.8764	0.27552										34.9112	0.27164		35.2002	0.21078
43.6968	0.37587		40.8646	0.25906										30.7496	0.30824		36.9342	0.26219
37.6856	0.34484		38.2636	0.27007										38.726	0.33313		34.4488	0.27489
38.9572	0.36217		39.593	0.21581										36.0672	0.27675		28.8422	0.19067
39.1306	0.34676		36.2406	0.27935										33.9864	0.20067		38.437	0.2837
39.5352	0.32917		35.1424	0.25482										37.2232	0.30247		27.455	0.07445
36.2406	0.29718		37.1654	0.27097										33.6396	0.33614		36.4718	0.24393
33.4084	0.26229		39.882	0.28312										33.4662	0.16863		34.7378	0.20799
40.3444	0.36627		42.483	0.28898										33.813	0.30322		34.3332	0.27749
34.5066	0.29496		42.7142	0.23715										35.258	0.27118		32.8882	0.18279
41.327	0.36259		37.6856	0.26064										33.3506	0.29315		32.1946	0.23529
45.8354	0.40101		35.4892	0.19615										36.414	0.32518		40.4022	0.25817
41.8472	0.36562		47.2804	0.22876										33.5818	0.25362		38.7838	0.18898
43.9858	0.38797		39.1306	0.26161										42.1362	0.30793		39.882	0.2954
37.0498	0.34238		43.5812	0.27431										34.2176	0.35789		30.056	0.05578
43.4078	0.33794		35.0846	0.24016										34.1598	0.2086		36.5296	0.24051
36.8186	0.32316		40.8068	0.2923										35.7204	0.1603		33.7552	0.05729
41.6738	0.36215		35.258	0.28023										38.3214	0.25486		37.9168	0.19973
45.1996	0.35903		34.969	0.30641										38.437	0.28767		42.3096	0.29374
40.2866	0.33387		41.327	0.26445										41.8472	0.31945		27.9174	0.06361
34.9112	0.34481		42.194	0.23123										35.8938	0.31349		34.0442	0.23293
36.125	0.28746		43.35	0.26307										35.3158	0.25664		31.3854	0.12398
36.8186	0.35585		36.7608	0.26447										28.6688	0.28028		46.2978	0.27511
43.5234	0.36425		37.0498	0.26512										38.4948	0.29489		39.0728	0.26155
38.6682	0.33885		45.662	0.27822										31.6744	0.29116		43.5812	0.30536
34.9112	0.27745		41.6738	0.2467										44.0436	0.33493		34.2176	0.30436
39.593	0.34613		46.529	0.2738										37.0498	0.31916		30.8652	0.11533
40.5178	0.33268		43.9858	0.25752										30.923	0.28775		37.7434	0.31498
30.923	0.33211		40.5756	0.24911										37.281	0.22931		39.015	0.22579
32.946	0.29536		39.8242	0.26476										42.0784	0.28824		34.5066	0.23077
43.7546	0.34513		37.9746	0.26626										37.1076	0.29564		26.6458	0.19292
39.4774	0.3971		33.6974	0.16853										41.0958	0.23241		40.4022	0.31598
40.8646	0.34952		36.8764	0.26027										42.5408	0.28476		34.969	0.23
35.7782	0.28862		45.7776	0.28639										43.8702	0.30266		34.68	0.32839
35.8938	0.26114		42.2518	0.25772										34.3332	0.2785		35.0268	0.26979
37.3966	0.37645		38.726	0.24564										38.2058	0.23194		32.8304	0.20677
39.4196	0.31663		36.8186	0.27104										40.6912	0.29256		37.1076	0.32745
44.7372	0.34668		34.3332	0.24271										38.5526	0.33748		35.836	0.28267
41.616	0.3317		47.1648	0.26843										37.859	0.30344		33.5818	0.32559
36.9342	0.35276		41.905	0.25048										34.0442	0.3014		28.0908	0.08661
37.3966	0.34503		33.6974	0.25219										39.8242	0.30952		33.6396	0.24458
38.0324	0.35958		34.2754	0.25743										41.038	0.31311		40.8068	0.32421
42.2518	0.36339		33.524	0.36182										37.1654	0.30343		29.3046	0.16102
45.0262	0.33777		34.5644	0.23408										33.1772	0.28678		30.1716	0.07422
37.5122	0.40244		36.992	0.29701										37.1076	0.30089		35.258	0.27138
40.8646	0.35954		38.3792	0.28029										37.8012	0.30284		34.5644	0.35771
32.1946	0.34438		44.9684	0.23079										38.0902	0.30818		36.9342	0.25201
42.2518	0.35296		38.726	0.2553										37.3388	0.30443		31.212	0.24306
38.8994	0.38719		35.8938	0.24623										39.9976	0.34297		29.4202	0.20634
41.327	0.33458		39.593	0.25874										33.8708	0.25856		39.4196	0.25491
39.015	0.29805		33.9864	0.31246										36.1828	0.28031		36.8186	0.25867
42.7142	0.33338		40.8068	0.26692										32.946	0.25522		30.5762	0.15334
36.2984	0.32374		37.6856	0.25952										32.946	0.29854		37.57	0.25038
44.1592	0.37825		39.8242	0.27464										31.9634	0.2273		37.6278	0.28715
40.3444	0.32224		41.7316	0.2753										32.5992	0.25537		33.6396	0.23039
41.616	0.33728		41.5582	0.22202										36.3562	0.30297		40.6912	0.22906
39.7664	0.34022		38.8416	0.23236										26.8192	0.22875		37.3966	0.29745
37.3966	0.32018		43.2344	0.27569										36.125	0.26182		40.6912	0.33008
34.1598	0.30994		39.2462	0.28552										33.0616	0.28243		29.8826	0.27095
39.1306	0.35569		31.5588	0.15603										32.3102	0.23349		27.455	0.23556
38.3214	0.3407		34.68	0.22973										45.0262	0.29437		37.1076	0.20092
36.8186	0.33148		35.6626	0.27588										40.8068	0.3145		34.6222	0.2786
39.5352	0.34995		41.2114	0.30625										41.616	0.29468		39.1306	0.20116
38.3214	0.42201		40.6912	0.27167										31.4432	0.33967		41.8472	0.28603
40.6334	0.37153		40.4022	0.28455										40.2288	0.30368		33.3506	0.31
36.0094	0.32069		39.8242	0.30211										36.1828	0.31827		34.1598	0.29432
41.8472	0.36071		36.992	0.20431										37.0498	0.30786		30.8074	0.1991
43.35	0.37389		33.2928	0.23405										39.0728	0.25984		34.5066	0.30235
44.1592	0.34923		39.0728	0.27248										33.1194	0.28242		29.2468	0.1371
35.547	0.30086		44.6794	0.22558										36.4718	0.27366		26.1834	0.20754
43.35	0.36448		40.2866	0.30785										38.3214	0.30666		33.8708	0.30742
46.6446	0.33865		44.1014	0.2157										36.703	0.22652		35.8938	0.2898
40.5756	0.37055		37.9168	0.26321										39.8242	0.33331		29.0734	0.15934
43.5812	0.38431		38.8994	0.25355										38.9572	0.29128		37.281	0.21284
31.1542	0.32659		34.969	0.2556										34.8534	0.28351		39.882	0.29755
39.1884	0.30518		37.9168	0.2699										33.6974	0.19579		35.3736	0.25628
36.4718	0.38117		41.7894	0.25766										33.813	0.26601		24.3916	0.16404
33.6396	0.30902		39.5352	0.24892										38.0324	0.33277		35.836	0.21867
45.2574	0.38914		37.2232	0.27623										38.5526	0.34373		37.859	0.33145
40.4022	0.33835		37.57	0.21101										41.616	0.29776		44.0436	0.24552
41.0958	0.34357		39.4774	0.28156										35.4314	0.26931		39.9976	0.2929
39.1306	0.3225		44.9106	0.25277										33.3506	0.23002		31.9056	0.33511
42.5986	0.34333		37.1076	0.22793										41.3848	0.3328		33.4084	0.28842
37.7434	0.36096		42.3674	0.23709										31.6744	0.33277		35.7204	0.23632
37.2232	0.36653		48.7832	0.24954										51.7888	0.33055		35.3158	0.30272
42.4252	0.35591		38.0324	0.29984										35.6048	0.29694		35.3158	0.18765
39.593	0.35874		43.0032	0.26496										42.4252	0.31632		54.043	0.33678
43.2344	0.32672		30.4028	0.23491										30.1138	0.30688		35.836	0.27806
40.9802	0.3685		42.2518	0.26935										33.8708	0.1909		31.2698	0.16796
39.7664	0.30959		34.8534	0.25283										38.2058	0.24666		35.8938	0.26065
42.8298	0.32834		34.4488	0.24957										32.7726	0.28938		34.1598	0.24448
41.616	0.34559		35.836	0.19508										36.703	0.29522		34.7378	0.28718
35.4892	0.37908		43.8702	0.2139										39.5352	0.28736		39.3618	0.30004
38.9572	0.32639		41.8472	0.24626										37.8012	0.25544		34.2754	0.22751
41.8472	0.35148		36.0672	0.2867										36.2406	0.24709		38.8416	0.2385
36.2984	0.28982		38.2636	0.23684										35.2002	0.29623		36.4718	0.36425
41.7316	0.35547		32.2524	0.22372										36.5874	0.32008		31.79	0.05938
41.9628	0.32058		38.2058	0.18759										38.2058	0.28802		37.1076	0.31281
40.8646	0.36092		34.8534	0.25652										34.7378	0.28753		36.8186	0.27404
37.8012	0.35364		38.726	0.24934										32.657	0.27884		33.0038	0.15953
46.4134	0.36974		36.703	0.29051										35.2002	0.28677		34.2176	0.07645
42.483	0.41307		37.2232	0.26594										36.1828	0.29931		30.7496	0.19908
40.8068	0.36135		39.4196	0.26015										36.992	0.23991		41.2114	0.31837
39.6508	0.38433		34.2754	0.25846										36.125	0.30341		36.6452	0.27858
37.7434	0.29201		35.3736	0.26792										42.0784	0.32439		33.0616	0.32744
37.7434	0.33741		37.3966	0.2708										36.992	0.27835		37.2232	0.27015
38.148	0.35425		30.7496	0.24481										46.9914	0.32423		27.455	0.13853
38.4948	0.3585		37.7434	0.22825										39.1884	0.28356		23.987	0.06031
41.7316	0.33707		34.969	0.22854										35.8938	0.19407		29.7092	0.29213
41.4426	0.34122		37.2232	0.29336										39.3618	0.31114		34.8534	0.30811
37.3388	0.31313		51.2686	0.19601										34.7378	0.27702		33.6974	0.27211
43.8702	0.32495		40.749	0.31045										32.946	0.29896		36.1828	0.19057
39.015	0.33938		32.8882	0.28668										33.813	0.29735		34.4488	0.26159
42.6564	0.37927		36.125	0.27052										36.3562	0.31142		35.8938	0.21505
45.951	0.33878		37.4544	0.25982										37.6856	0.26944		37.281	0.30486
40.2288	0.36282		39.9398	0.24463										30.923	0.21519		40.9802	0.16729
37.859	0.27908		36.125	0.25482										36.992	0.18748		38.3792	0.22141
36.4718	0.37376		45.1418	0.31333										41.1536	0.30276		38.3792	0.29801
37.3966	0.36218		34.0442	0.24019										40.6912	0.28254		38.437	0.28601
43.1766	0.37417		40.6334	0.25956										36.8186	0.30085		39.2462	0.31576
39.8242	0.34445		49.708	0.28443										34.6222	0.32307		40.5178	0.31801
43.061	0.31854		40.171	0.05726										39.593	0.25411		33.7552	0.291
32.657	0.31131		32.3102	0.32941										27.0504	0.05723		35.836	0.2561
38.4948	0.35388		39.304	0.23566										35.836	0.34058		33.6396	0.24213
38.2636	0.3172		41.9628	0.26159										41.038	0.23052		28.611	0.15316
36.2406	0.26284		38.7838	0.28129										34.4488	0.21481		35.6048	0.28682
37.5122	0.32641		42.4252	0.25783										35.9516	0.32455		38.0324	0.31047
39.6508	0.34458		36.8186	0.32267										37.7434	0.28818		40.6912	0.3073
33.3506	0.30645		35.6048	0.26886										37.281	0.26074		51.9044	0.19268
37.0498	0.3335		44.6216	0.24935										41.1536	0.33726		38.0324	0.29629
40.5178	0.3318		33.1772	0.35578										32.4836	0.2813		43.1188	0.339
43.7546	0.37042		36.8764	0.26512										34.5644	0.28651		36.8764	0.26522
40.2866	0.34844		48.9566	0.33599										41.6738	0.33765		41.6738	0.30029
37.3966	0.35902		42.4252	0.27455										36.125	0.32005		34.102	0.27188
41.327	0.3408		32.2524	0.30836										35.4892	0.32015		39.1306	0.29314
32.7148	0.34234		40.8068	0.22987										37.9168	0.26134		34.68	0.1808
38.726	0.30899		45.6042	0.05943										36.2406	0.29766		32.4258	0.1789
41.905	0.36972		37.281	0.24954										35.547	0.32548		35.3158	0.30496
44.9106	0.34102		40.3444	0.29544										36.4718	0.18326		33.9286	0.19485
43.1188	0.35406		39.1884	0.22802										37.859	0.27679		31.212	0.23451
42.9454	0.37428		32.1946	0.24817										37.281	0.27766		37.1654	0.28716
40.5756	0.32024		35.547	0.26334										35.4892	0.21179		30.5184	0.15292
38.3792	0.39407		38.8416	0.27581										43.8124	0.33331		31.0386	0.28002
41.038	0.3602		33.0616	0.25435										40.9224	0.32921		40.8646	0.30252
36.5296	0.34462		42.0784	0.24296										30.6918	0.21228		38.9572	0.28619
37.859	0.29256		45.662	0.28575										36.5874	0.31948		41.6738	0.31798
37.9168	0.41498		38.9572	0.27837										38.9572	0.33874		33.4662	0.2481
42.1362	0.36969		42.3096	0.28425										40.1132	0.32879		29.3046	0.19307
39.304	0.38383		38.2058	0.24879										54.5632	0.32528		41.3848	0.3013
35.3736	0.30797		31.5588	0.27456										32.1368	0.23717		37.4544	0.30916
42.3674	0.43272		34.7378	0.2652										33.8708	0.29734		39.1884	0.28102
38.726	0.34717		36.414	0.24901										37.9746	0.23128		37.0498	0.27352
32.7148	0.30651		40.8068	0.25777										39.7086	0.29853		34.969	0.27617
39.4774	0.3512		40.171	0.27552										46.0666	0.35479		43.2922	0.30551
40.9802	0.34975		31.0386	0.29441										31.0964	0.27112		35.8938	0.25561
33.0038	0.34207		33.1194	0.25475										41.616	0.23497		34.2754	0.34733
42.4252	0.37366		39.9398	0.25843										37.4544	0.25406		35.6626	0.27803
42.9454	0.38162		38.3214	0.23283										33.4084	0.29217		33.1194	0.24458
44.506	0.36824		31.1542	0.25883										35.6626	0.32511		36.8186	0.31415
37.859	0.34417		37.0498	0.25912										34.9112	0.27653		39.4196	0.15006
42.772	0.33814		43.6968	0.29535										34.2754	0.26354		38.7838	0.31908
41.327	0.34464		36.703	0.26135										36.8186	0.30976		30.345	0.22385
38.437	0.32347		35.6048	0.23771										35.836	0.30148		33.8708	0.31225
39.9976	0.40288		39.9398	0.28841										37.3966	0.2952		39.593	0.26751
42.8876	0.35296		39.9976	0.25898										26.7614	0.17906		39.4196	0.27271
42.483	0.36314		39.5352	0.19406										40.9802	0.31458		37.859	0.29322
35.0268	0.31052		48.6676	0.26124										38.5526	0.28433		34.68	0.171
34.2754	0.30826		41.7894	0.2514										34.8534	0.32129		35.6626	0.20016
40.3444	0.3312		42.483	0.26602										33.9864	0.27225		36.8186	0.25672
39.8242	0.39822		39.9398	0.27103										36.9342	0.25636		31.9056	0.28739
41.1536	0.35948		43.4656	0.29423										36.5874	0.27135		27.9174	0.1445
37.1654	0.39246		37.5122	0.26257										33.524	0.22696		44.3326	0.30407
38.8994	0.37949		38.3214	0.28351										34.7956	0.26904		36.2406	0.23964
41.2692	0.31998		39.882	0.26898										37.3966	0.29226		34.2754	0.26208
42.194	0.39483		33.9864	0.23816										43.928	0.28481		36.703	0.27511
40.5756	0.33439		38.3792	0.36324										37.859	0.2808		38.3214	0.28712
41.9628	0.35551		36.8764	0.29178										30.923	0.27076		25.0274	0.08174
37.9746	0.34303		39.4196	0.21959										37.5122	0.33033		33.9864	0.20696
37.9746	0.35226		38.6104	0.28541										40.749	0.19285		34.0442	0.24192
37.4544	0.31975		40.6912	0.25339										37.859	0.29242		41.327	0.32654
39.9976	0.34484		40.46	0.29399										43.7546	0.27971		33.0038	0.30347
35.7204	0.30703		38.0902	0.2751										36.2406	0.24395		35.0846	0.2945
37.9168	0.36306		45.6042	0.2667										36.125	0.28882		31.212	0.16305
40.5178	0.348		47.3382	0.2636										33.0038	0.16078		31.212	0.20486
40.5178	0.34819		35.6048	0.26273										34.3332	0.26291		31.6744	0.17097
38.8994	0.34992		32.946	0.2472										33.8708	0.28711		28.0908	0.22044
42.7142	0.35304		38.2058	0.26233										32.7726	0.31183		38.437	0.28779
44.8528	0.3762		39.0728	0.26856										35.7204	0.29338		37.1654	0.29049
38.3792	0.34975		35.0846	0.26986										32.2524	0.34101		37.2232	0.23876
40.5178	0.3195		43.1766	0.23042										36.7608	0.29829		36.0094	0.25512
46.5868	0.40575		35.8938	0.28345										34.6222	0.30437		32.5992	0.24731
42.8876	0.36248		44.3904	0.27892										37.3966	0.30447		41.2692	0.29757
41.0958	0.34684		39.593	0.25516										42.8876	0.30117		40.9224	0.29846
40.3444	0.3623		37.859	0.26329										40.6912	0.27518		39.015	0.29526
39.7086	0.34906		37.8012	0.28848										33.9864	0.24723		33.235	0.26087
37.9746	0.33087		39.6508	0.27496										39.7086	0.31642		38.437	0.01873
38.4948	0.34885		37.1076	0.26944										39.3618	0.33046		31.1542	0.28715
40.8068	0.30074		34.7378	0.2552										44.6794	0.30901		28.322	0.15795
37.3388	0.32426		32.657	0.23761										40.8646	0.31256		41.5582	0.30972
35.7782	0.34278		38.3792	0.22684										42.1362	0.32026		34.102	0.27729
35.7782	0.38781		40.9224	0.29602										36.9342	0.18108		36.5874	0.27172
38.726	0.33796		40.1132	0.24624										28.2642	0.06822		31.3854	0.32898
40.171	0.40169		36.992	0.27147										35.4314	0.25694		36.8764	0.19266
45.7776	0.36457		35.7782	0.26772										33.9864	0.26324		33.5818	0.22201
38.3214	0.33576		42.0784	0.22676										38.148	0.29503		30.2294	0.21485
38.148	0.35067		36.1828	0.23866										39.7086	0.25647		33.7552	0.18975
37.8012	0.34155		42.9454	0.28011										39.6508	0.34079		33.1772	0.22857
43.0032	0.37183		39.1884	0.2633										28.2642	0.22874		37.4544	0.31847
41.7316	0.39038		38.9572	0.28245										42.5986	0.28422		37.281	0.32955
43.061	0.37119		39.0728	0.25623										31.3854	0.26029		37.6278	0.27734
42.3096	0.36198		33.1194	0.26029										38.148	0.3252		35.4892	0.22549
39.882	0.33331		42.2518	0.27575										32.3102	0.20548		33.4662	0.20301
38.8994	0.40279		31.212	0.20223										42.8876	0.3155		30.5762	0.18996
41.6738	0.33681		36.0672	0.20223										34.2754	0.2199		35.547	0.20016
41.4426	0.3848		37.3966	0.28086										36.1828	0.1969		35.6626	0.24969
37.859	0.39635		36.5874	0.23009										35.7204	0.30918		43.928	0.30624
37.8012	0.33647		37.2232	0.27468										34.68	0.20407		31.7322	0.22175
34.969	0.36853		30.4606	0.23725										33.813	0.28799		38.2636	0.25507
43.0032	0.35003		35.1424	0.24771										35.6048	0.29425		30.1716	0.13757
42.0206	0.3356		39.2462	0.3077										33.813	0.33005		29.3046	0.15467
37.1076	0.33364		41.6738	0.30283										34.0442	0.31306		38.9572	0.31359
47.7428	0.35165		38.3214	0.2396										41.6738	0.30829		41.327	0.28336
39.5352	0.35153		48.0896	0.25992										33.4084	0.17717		33.0616	0.30897
43.7546	0.36001		37.2232	0.27183										33.4662	0.35381		33.524	0.25874
47.2804	0.35676		34.1598	0.24858										27.9752	0.215		35.9516	0.27381
40.1132	0.33997		35.0268	0.2341										41.2114	0.35382		30.2294	0.25669
40.5178	0.35067		39.9398	0.27106										32.8304	0.24212		37.3966	0.26629
38.148	0.31661		43.8702	0.29483										29.3046	0.26892		32.5992	0.21976
35.1424	0.30772		28.4954	0.37187										38.726	0.2862		34.1598	0.15965
47.7428	0.38175		40.171	0.27507										35.2002	0.26119		35.258	0.2834
39.4196	0.36022		36.2406	0.27872										30.6918	0.22903		32.079	0.20502
41.2692	0.36264		38.6682	0.29699										40.8068	0.30689		39.1306	0.31039
33.9286	0.34356		42.4252	0.26175										40.8068	0.35807		36.414	0.32415
37.6278	0.39922		42.5986	0.26884										35.4892	0.29576		38.437	0.33916
40.8646	0.32202		27.3972	0.32998										34.3332	0.30217		36.0672	0.2597
41.2692	0.36176		27.6862	0.25663										39.5352	0.34838		34.7378	0.28576
37.281	0.36545		39.7086	0.29759										37.0498	0.23314		29.2468	0.04046
37.6856	0.33216		42.8298	0.20705										36.4718	0.29489		32.1368	0.17268
36.703	0.32247		44.506	0.18494										35.7782	0.27234		35.7782	0.31192
46.1244	0.36641		41.5582	0.29053										38.7838	0.30856		36.9342	0.21143
38.3214	0.4139		36.9342	0.24479										37.8012	0.30232		51.153	0.23373
35.836	0.36506		37.9746	0.27023										36.2984	0.32025		24.1604	0.04593
38.0324	0.42806		43.35	0.27615										34.0442	0.24921		37.7434	0.2651
44.9106	0.38396		44.4482	0.29477										41.5582	0.33403		35.2002	0.16194
41.327	0.35576		42.483	0.27236										37.2232	0.26809		38.3214	0.2499
40.5178	0.38721		41.905	0.27925										30.7496	0.22235		43.4656	0.34847
42.3096	0.32645		40.9802	0.30985										37.0498	0.25809		40.2866	0.26456
40.6912	0.36737		40.0554	0.25678										32.1946	0.29031		36.992	0.30402
48.3786	0.35185		38.0902	0.23317										35.7204	0.25813		35.258	0.18074
40.0554	0.34973		34.4488	0.26361										31.8478	0.28098		31.5588	0.28332
36.703	0.31831		33.813	0.23142										30.7496	0.22566		36.0672	0.22091
46.8758	0.33915		41.5004	0.27033										35.3158	0.30076		34.2176	0.29389
38.3214	0.39973		36.2984	0.25997										35.3158	0.30076		30.2294	0.23728
33.4662	0.35656		33.3506	0.26371										34.102	0.23707		36.1828	0.14242
44.4482	0.34969		34.0442	0.27391										42.483	0.31193		42.194	0.28809
40.3444	0.37272		36.4718	0.21453										36.5874	0.27423		33.6396	0.2702
35.3158	0.32597		37.9168	0.27878										36.2406	0.3228		33.5818	0.25945
40.749	0.30923		44.6216	0.28755										38.0902	0.30179		38.9572	0.30322
42.0206	0.3619		37.859	0.21345										32.657	0.21175		33.8708	0.29086
37.1076	0.33585		34.0442	0.24766										38.4948	0.31225		38.8994	0.22443
38.0324	0.36374		33.524	0.23441										34.969	0.24598		34.969	0.2321
43.1188	0.33069		42.0206	0.27034										41.7894	0.23599		34.0442	0.28983
39.7664	0.35332		40.5756	0.3066										34.1598	0.29212		36.4718	0.32148
45.1996	0.35341		38.0902	0.23056										36.2984	0.25013		30.7496	0.14673
40.9224	0.39637		38.726	0.22877										33.524	0.27237		35.0846	0.20054
38.5526	0.36273		35.836	0.25325										38.4948	0.2557		37.5122	0.29687
38.2058	0.35383		39.9398	0.24184										33.4662	0.30295		35.9516	0.20103
35.6626	0.30741		38.9572	0.28355										37.5122	0.27871		32.3102	0.21889
38.0902	0.35339		41.8472	0.28007										42.194	0.29334		39.8242	0.30574
44.2748	0.37429		42.0784	0.27219										36.8186	0.24207		37.9168	0.32403
43.928	0.35697		40.8646	0.28581										32.5414	0.05476		31.4432	0.16131
43.1766	0.36048		29.767	0.24459										31.5588	0.16733		35.0846	0.22079
33.6396	0.30836		32.657	0.25016										27.5706	0.25806		35.0846	0.22079
41.7894	0.34845		37.5122	0.27976										36.414	0.308		33.2928	0.251
43.8124	0.35597		36.2984	0.20139										33.524	0.25521		37.0498	0.30483
42.4252	0.36808		47.9162	0.27104										28.7844	0.29933		34.7956	0.26145
33.235	0.36663		38.5526	0.30706										34.3332	0.145		34.0442	0.28378
37.57	0.31041		38.437	0.27818										36.9342	0.28798		32.368	0.2146
38.2058	0.33417		36.4718	0.25606										32.4836	0.12034		39.1884	0.38175
44.217	0.37611		42.483	0.29287										35.1424	0.30334		29.189	0.16317
36.8764	0.31329		46.3556	0.28023										32.3102	0.26617		32.1946	0.22365
38.3792	0.35164		43.4078	0.25994										40.5756	0.30763		38.2636	0.27327
39.1306	0.34651		35.4892	0.26108										35.547	0.2863		32.4258	0.23464
40.8646	0.30687		32.1946	0.29729										35.3158	0.19872		40.4022	0.09927
38.2058	0.35216		33.9286	0.26041										34.102	0.27783		39.015	0.28312
36.6452	0.3369		41.1536	0.29368										40.6912	0.31409		41.616	0.23724
46.1244	0.3693		46.1822	0.2859										40.171	0.29877		35.7204	0.31744
40.171	0.36602		36.8186	0.22078										33.6396	0.17666		34.68	0.17298
44.1014	0.39241		37.6856	0.28034										39.6508	0.30632		36.8764	0.19478
35.547	0.3036		40.6334	0.23338										36.2406	0.34132		38.148	0.30235
42.0206	0.37617		35.836	0.25429										30.9808	0.29022		29.478	0.27063
39.9398	0.32681		37.3966	0.30003										40.0554	0.29313		35.9516	0.20517
37.1076	0.32477		39.015	0.25313										28.322	0.29024		33.1194	0.2894
40.8068	0.35434		39.304	0.31896										33.0038	0.26207		35.3736	0.14004
41.7894	0.33921		39.7086	0.23815										35.6626	0.27239		39.015	0.23048
36.992	0.32539		38.8416	0.26039										35.0846	0.30931		30.8652	0.31524
43.0032	0.32263		38.8994	0.25191										33.2928	0.17103		36.3562	0.27912
44.2748	0.37149		40.1132	0.2539										35.3736	0.18614		37.1654	0.27125
42.2518	0.36261		35.6048	0.29017										37.1654	0.28526		33.524	0.23313
45.0262	0.34007		39.882	0.2367										32.946	0.24166		42.0784	0.2855
37.6278	0.34763		31.1542	0.24184										35.547	0.17267		37.57	0.19965
38.6682	0.32656		42.9454	0.26119										42.8876	0.36433		37.1654	0.24268
36.992	0.33457		30.9808	0.26288										39.5352	0.29396		36.992	0.22988
40.171	0.34326		37.3388	0.28065										32.657	0.21471		32.946	0.20279
48.6098	0.36962		44.9106	0.23782										42.2518	0.33622		32.657	0.29512
46.5868	0.38454		40.0554	0.25045										37.9168	0.29145		36.3562	0.31296
37.9746	0.3726		35.258	0.18945										41.8472	0.33016		31.3854	0.04701
41.0958	0.37288		43.4078	0.21023										32.079	0.26871		35.258	0.22796
42.194	0.34895		35.1424	0.27947										42.4252	0.34789		42.5986	0.20244
39.1306	0.34556		40.2866	0.28206										36.2406	0.29315		41.4426	0.27705
39.015	0.32133		36.0672	0.31398										29.8248	0.195		36.2984	0.14201
39.1884	0.32775		38.3792	0.23879										38.8416	0.32609		30.2294	0.16725
40.9802	0.31032		39.2462	0.28851										42.6564	0.33275		32.7148	0.17235
33.3506	0.30311		38.726	0.27346										35.0846	0.31522		33.5818	0.15161
46.818	0.3559		33.235	0.22317										37.9746	0.3345		33.813	0.22246
43.4078	0.35953		38.726	0.27501										40.8646	0.28119		32.5414	0.21066
41.0958	0.31298		42.483	0.27397										38.2058	0.31304		39.4774	0.2275
42.0784	0.36687		39.015	0.25384										31.3854	0.25796		42.5408	0.30545
41.7894	0.29405		39.4196	0.27967										37.6856	0.26968		35.258	0.13474
36.125	0.31793		37.3388	0.28208										33.1194	0.17007		37.5122	0.24046
40.749	0.35457		36.8186	0.24435										37.1654	0.2614		33.0038	0.25854
39.0728	0.33727		43.928	0.04607										32.079	0.1878		39.3618	0.30596
37.2232	0.36543		30.634	0.26915										26.299	0.2407		37.6278	0.36952
40.3444	0.32026		41.905	0.26531										33.0616	0.27759		30.056	0.19738
40.6912	0.32183		34.969	0.25971										30.634	0.28198		40.0554	0.28255
41.1536	0.36118		41.2692	0.25593										35.9516	0.32052		36.9342	0.22087
42.194	0.34042		39.3618	0.27928										38.8416	0.3106		36.3562	0.28146
45.0262	0.36887		34.7956	0.2739										36.703	0.36406		34.68	0.3209
38.8416	0.34063		35.2002	0.25777										36.992	0.24372		34.102	0.27702
41.616	0.31251		42.5408	0.27677										38.3214	0.28147		38.6104	0.23063
35.0268	0.33207		25.8366	0.17939										39.1306	0.27051		33.524	0.15829
44.8528	0.35949		42.3674	0.32512										36.125	0.29799		41.4426	0.19611
38.3792	0.31491		33.6396	0.23433										40.2288	0.32165		31.501	0.27514
38.6682	0.34764		35.836	0.26801										38.4948	0.30516		38.6682	0.21
41.6738	0.36915		34.2754	0.26057										37.7434	0.34588		37.6856	0.23587
40.2288	0.33023		31.3854	0.29052										33.6396	0.29882		34.1598	0.29881
33.6974	0.28867		36.0094	0.25053										36.3562	0.28155		43.9858	0.1655
40.8646	0.37766		39.015	0.27756										31.79	0.22578		37.4544	0.29807
36.6452	0.33589		36.1828	0.27648										41.0958	0.31908		37.8012	0.28099
36.703	0.41401		45.0262	0.28356										39.8242	0.22946		36.2406	0.19338
39.7086	0.36458		39.2462	0.22848										44.4482	0.30132		38.148	0.29533
41.6738	0.36374		43.061	0.30535										38.9572	0.28539		33.0038	0.21061
43.6968	0.33996		39.015	0.33567										34.5066	0.24619		34.3332	0.31062
37.2232	0.33445		37.9746	0.2751										37.859	0.27977		36.1828	0.28138
36.7608	0.31788		37.7434	0.2649										34.2754	0.18602		27.3972	0.17791
43.0032	0.34477		39.9398	0.25										37.9168	0.3101		30.4028	0.23403
47.107	0.36932		37.5122	0.25275										33.813	0.32957		35.0846	0.18578
38.2058	0.34097		40.2866	0.3244										31.501	0.2857		35.258	0.20354
44.6794	0.43064		34.7378	0.25615										41.2114	0.32946		29.478	0.24692
36.3562	0.34259		41.038	0.26466										34.4488	0.29774		39.9976	0.26276
37.1654	0.32093		40.6912	0.29231										30.5184	0.23962		36.414	0.20049
36.6452	0.38556		32.1946	0.26135										35.3158	0.33201		30.1138	0.19637
41.0958	0.37091		40.4022	0.27338										36.5296	0.29075		37.57	0.30971
42.7142	0.38284		37.9746	0.27881										42.194	0.25374		34.3332	0.2592
39.4196	0.3423		33.6974	0.20865										38.726	0.31755		39.3618	0.31202
41.1536	0.34444		34.5066	0.28118										29.6514	0.12839		33.3506	0.07544
43.5234	0.37984		37.1654	0.26381										35.258	0.27039		33.6974	0.28914
35.3736	0.39288		35.547	0.30399										36.3562	0.31581		42.0784	0.2844
45.7198	0.3477		36.1828	0.27238										35.547	0.31131		33.2928	0.18827
40.9224	0.36864		40.5756	0.27859										38.6682	0.28044		33.8708	0.18013
45.1996	0.36819		41.3848	0.26429										36.5296	0.26429		37.6856	0.32515
35.0268	0.37367		43.1766	0.24681										36.2406	0.35519		35.1424	0.29003
39.7664	0.34857		33.9864	0.26488										35.836	0.2833		37.4544	0.23379
39.5352	0.33017		38.437	0.26546										40.6912	0.34506		34.3332	0.32226
37.0498	0.35537		31.6744	0.15054										38.2058	0.30146		33.6974	0.08423
34.7956	0.40502		35.0846	0.29986										40.46	0.30379		38.8994	0.29506
44.1014	0.38222		29.767	0.25377										33.5818	0.28809		37.281	0.31173
40.8646	0.37768		38.437	0.28424										33.813	0.32553		38.148	0.29961
43.6968	0.33356		44.3326	0.27013										40.6912	0.311		41.8472	0.19038
37.9746	0.34307		36.8764	0.20876										28.9	0.08528		37.57	0.28461
35.6048	0.31652		42.9454	0.26484										37.57	0.32514		40.2866	0.29088
43.6968	0.35828		39.4196	0.24023										29.8248	0.23097		35.547	0.2463
48.7254	0.37205		37.2232	0.24234										33.5818	0.2394		30.634	0.16244
39.5352	0.36022		36.8764	0.25952										40.8068	0.29634		36.0094	0.28527
36.5296	0.32613		39.4196	0.24326										33.2928	0.23171		37.859	0.19435
39.6508	0.38243		40.2288	0.25704										25.432	0.02051		39.5352	0.26963
37.3966	0.38177		40.1132	0.25965										37.2232	0.32849		35.547	0.21752
35.0846	0.34471		36.4718	0.28712										29.8248	0.29474		26.0678	0.10444
39.2462	0.36957		39.6508	0.25705										36.7608	0.3648		36.0672	0.23296
32.8304	0.31892		40.749	0.26928										28.7844	0.23347		38.4948	0.32421
43.0032	0.37255		40.0554	0.25121										42.3674	0.27401		38.8994	0.31456
39.8242	0.34273		30.634	0.23375										36.7608	0.26941		45.4886	0.30562
39.593	0.35135		36.8764	0.27364										38.2636	0.37929		26.7614	0.0421
37.3966	0.3129		47.2226	0.29425										35.3736	0.26644		29.3046	0.03507
40.2866	0.29805		36.3562	0.26218										41.3848	0.33526		35.836	0.2097
38.437	0.33222		36.1828	0.28862										45.4886	0.29019		27.3394	0.08895
46.24	0.36532		31.2698	0.24363										39.882	0.30573		38.3792	0.1733
40.9224	0.33701		42.0206	0.27607										37.2232	0.16553		36.703	0.31978
39.8242	0.3406		35.0268	0.25555										35.3736	0.24351		30.056	0.1017
39.015	0.36785		39.9976	0.2899										39.4774	0.30653		36.1828	0.23765
41.1536	0.39115		42.6564	0.31655										30.8652	0.21667		44.9106	0.32116
46.1822	0.38337		42.194	0.26226										45.084	0.32108		33.1772	0.21064
38.3214	0.33513		39.882	0.28472										36.414	0.31789		37.3388	0.23068
34.5066	0.36008		48.6676	0.26354										38.4948	0.29131		28.3798	0.09841
40.8068	0.36847		34.5644	0.2488										38.8416	0.19661		26.6458	0.17435
36.7608	0.36496		24.9696	0.26289										36.0094	0.32359		36.5874	0.19367
42.194	0.38796		43.1188	0.26967										41.616	0.31516		32.8304	0.22851
43.1766	0.38477		36.4718	0.27932										38.0324	0.29077		35.547	0.28003
40.8646	0.34588		35.3736	0.26098										41.038	0.28406		33.524	0.26599
44.2748	0.37093		42.1362	0.25079										35.8938	0.20099		36.1828	0.26649
45.0262	0.357		39.7664	0.23284										37.57	0.36182		35.9516	0.27514
39.2462	0.34114		47.3382	0.25723										38.6682	0.2824		33.6396	0.25338
43.8702	0.35279		35.9516	0.27169										29.6514	0.22842		39.4196	0.2987
38.6682	0.28953		38.7838	0.26972										41.038	0.30542		37.2232	0.3265
35.258	0.38429		41.7316	0.26498										36.0672	0.16016		31.7322	0.27727
35.3736	0.31351		38.2636	0.24675										43.4656	0.33309		31.0386	0.23322
44.6794	0.3928		33.9864	0.22158										30.4606	0.13642		34.5066	0.24177
37.6856	0.31663		32.8304	0.30364										30.056	0.29331		38.3214	0.30819
41.3848	0.37239		35.4892	0.23924										40.46	0.32678		36.3562	0.28207
44.9684	0.377		42.483	0.24531										37.5122	0.26562		34.9112	0.32026
43.5812	0.32638		44.7372	0.26833										34.5644	0.25971		39.882	0.30817
32.1946	0.32768		40.6912	0.29289										35.8938	0.31163		29.8248	0.25345
42.483	0.39431		40.4022	0.28218										38.8416	0.25722		27.9174	0.18963
43.639	0.33831		37.3966	0.25626										36.8186	0.287		33.2928	0.26951
35.6048	0.33231		33.1772	0.34465										37.6278	0.33828		38.8994	0.30049
38.726	0.41149		43.5234	0.26699										35.547	0.35064		34.0442	0.20039
35.2002	0.44973		37.9168	0.27451										35.0268	0.29237		31.501	0.22295
33.9286	0.29535		42.6564	0.2733										31.501	0.19135		33.9864	0.17744
38.0324	0.3324		41.7316	0.29763										38.0902	0.29404		31.9634	0.27554
36.2984	0.31244		40.5178	0.29572										47.107	0.3183		36.703	0.26489
38.0902	0.38467		38.9572	0.23787										30.2294	0.33266		36.5296	0.25152
36.1828	0.3088		38.148	0.26411										37.2232	0.23972		33.1772	0.28573
37.2232	0.32342		31.212	0.23732										36.5296	0.28615		33.1772	0.24297
44.9106	0.32768		38.6682	0.24366										36.703	0.25818		52.5402	0.19037
38.8994	0.34786		32.3102	0.2063										34.5644	0.2874		34.969	0.1799
36.5874	0.31944		36.8764	0.30141										34.7956	0.2864		39.7664	0.27852
36.6452	0.31494		36.5296	0.24863										42.7142	0.28782		35.0846	0.28682
41.1536	0.35158		32.8304	0.27802										34.969	0.30156		37.1654	0.28882
40.3444	0.40434		36.125	0.27018										33.7552	0.30061		36.3562	0.25347
42.772	0.37046		39.4774	0.262										36.8186	0.22085		35.8938	0.35554
40.2866	0.36021		40.8646	0.26826										39.4774	0.33738		36.4718	0.28215
34.969	0.3117		46.4712	0.25465										43.2344	0.36089		47.0492	0.3216
43.2922	0.36274		38.6104	0.2765										36.5296	0.27427		33.3506	0.28301
45.2574	0.38889		41.905	0.2819										43.4078	0.29833		37.281	0.31656
37.281	0.35362		38.5526	0.26184										37.281	0.33215		32.1946	0.23234
40.1132	0.37415		41.0958	0.26795										41.2114	0.29		35.7204	0.21736
37.57	0.35265		34.6222	0.24636										35.836	0.31495		41.4426	0.26066
37.4544	0.39829		42.0784	0.25374										40.4022	0.31093		39.5352	0.21183
34.2754	0.33378		35.4314	0.26143										35.3736	0.20618		32.5414	0.16041
46.0088	0.34562		36.1828	0.31521										37.0498	0.29969		40.6912	0.32533
40.1132	0.34565		39.7086	0.26261										26.9348	0.24757		31.9056	0.23289
41.7894	0.31755		39.304	0.23815										28.033	0.29108		25.9522	0.27799
41.7316	0.33022		36.9342	0.26648										39.2462	0.32509		38.726	0.28543
40.4022	0.32477		44.795	0.26968										25.9522	0.19469		52.9448	0.2968
39.9398	0.35653		37.57	0.29112										39.593	0.30136		35.9516	0.21961
35.8938	0.32846		36.7608	0.23971										38.9572	0.26381		34.3332	0.22212
45.7776	0.37942		42.8876	0.27807										31.5588	0.29327		42.6564	0.32022
47.6272	0.34732		37.5122	0.26567										30.634	0.21977		31.0964	0.32038
38.8994	0.34562		40.5756	0.26577										33.9864	0.24256		40.1132	0.27264
46.0088	0.35657		40.5178	0.26082										41.616	0.31799		29.0156	0.17665
39.5352	0.353		39.4196	0.23963										34.0442	0.29483		35.0846	0.204
43.8702	0.3798		42.0784	0.29735										39.4196	0.31832		36.5296	0.31018
40.171	0.35042		41.5582	0.25083										35.2002	0.35199		40.9224	0.28592
36.0094	0.33318		40.2288	0.25031										37.5122	0.28432		27.8596	0.08551
40.9224	0.40469		40.0554	0.21089										41.8472	0.27725		29.9404	0.06076
36.992	0.3201		42.8298	0.27115										37.4544	0.31625		34.68	0.25075
46.4712	0.34927		38.8416	0.26431										32.8882	0.31106		37.3966	0.29615
41.9628	0.35915		38.6682	0.23918										32.1946	0.24469		35.7782	0.30033
40.5178	0.32424		36.2984	0.245										38.8416	0.27407		37.5122	0.30618
41.4426	0.36687		32.8304	0.24024										37.57	0.27021		31.2698	0.14428
42.7142	0.37794		33.1772	0.26716										42.5986	0.31428		40.2866	0.21814
36.5874	0.24967		42.2518	0.23777										32.8304	0.29476		36.6452	0.13646
47.685	0.36489		32.4258	0.25725										34.969	0.27791		35.0268	0.29692
42.0784	0.34685		42.9454	0.26466										38.7838	0.27562		34.8534	0.22591
37.3966	0.35154		37.57	0.24664										43.4078	0.28758		34.9112	0.25599
36.7608	0.3384		37.281	0.24971										42.3674	0.29144		30.923	0.21397
41.2692	0.31782		40.749	0.24647										35.9516	0.31888		35.6048	0.19246
31.0964	0.39416		40.171	0.26043										39.1884	0.31309		34.5066	0.2352
50.575	0.37151		35.3736	0.2526										35.1424	0.28965		37.57	0.24975
39.882	0.34291		42.3674	0.24722										35.4314	0.33343		39.1306	0.281
39.0728	0.36025		44.3904	0.28965										32.657	0.23875		34.4488	0.3456
39.4774	0.36625		45.1996	0.28181										34.2176	0.23888		36.5296	0.20057
37.6856	0.33616		40.2288	0.26599										33.8708	0.29888		35.8938	0.14801
40.9802	0.3312		37.9746	0.25489										41.616	0.31027		34.4488	0.22099
37.5122	0.29358		38.2058	0.27405										38.9572	0.30703		39.1884	0.3204
37.9168	0.36182		37.7434	0.27675										38.8416	0.33795		35.9516	0.17344
38.2636	0.35024		45.3152	0.26774										32.8304	0.28718		42.2518	0.22334
41.4426	0.37392		31.6166	0.27077										40.171	0.27967		38.5526	0.13383
36.8186	0.32514		40.5756	0.26711										38.7838	0.29978		30.9808	0.32734
40.2288	0.37015		40.6334	0.21761										38.8994	0.2784		33.2928	0.21936
41.3848	0.3389		35.3736	0.25169										36.2406	0.31592		35.3736	0.27522
44.506	0.39238		40.4022	0.30641										41.7316	0.31432		37.5122	0.24835
37.4544	0.32544		40.3444	0.2709										28.7844	0.25406		34.8534	0.31565
41.905	0.3787		31.5588	0.28306										30.4028	0.25463		39.304	0.30435
38.8994	0.33149		36.4718	0.2628										37.9168	0.32848		29.8248	0.20892
43.0032	0.37413		22.3108	0.20947										36.4718	0.28814		38.0324	0.33571
40.9802	0.3104		37.0498	0.27494										30.1138	0.16738		32.2524	0.26205
39.3618	0.31962		41.3848	0.25196										34.9112	0.20657		34.5644	0.15864
41.038	0.34491		43.8124	0.26988										38.4948	0.33044		38.5526	0.24807
38.437	0.40223		37.0498	0.22875										36.125	0.28634		35.258	0.29618
44.795	0.33497		36.5296	0.26265										34.68	0.26836		42.0206	0.30424
37.859	0.33674		44.4482	0.28042										35.1424	0.25225		31.4432	0.1676
40.46	0.36064		38.0902	0.28985										36.3562	0.27476		32.8882	0.203
40.8068	0.36087		36.125	0.27303										37.4544	0.19534		30.4606	0.15594
47.685	0.35658		39.2462	0.28529										31.3276	0.28372		41.5004	0.30192
44.1592	0.37896		37.57	0.25688										40.3444	0.30551		41.038	0.31074
41.5004	0.34991		41.905	0.27701										38.5526	0.25855		40.8646	0.32423
44.9684	0.36189		38.7838	0.23874										39.8242	0.31168		37.7434	0.22838
40.6912	0.36466		48.7832	0.23188										40.2866	0.30104		39.4196	0.15929
44.217	0.31686		44.9684	0.27477										35.0268	0.30362		33.813	0.21025
43.0032	0.35817		33.9864	0.23246										36.6452	0.33433		33.2928	0.16778
36.2984	0.3764		43.5812	0.28735										37.1076	0.22494		28.7844	0.08537
40.1132	0.35144		39.7664	0.28268										36.6452	0.31422		36.125	0.29719
34.7378	0.36894		40.4022	0.29097										36.414	0.32034		35.836	0.10576
37.6856	0.33115		36.8186	0.28368										34.5644	0.23499		33.9864	0.24725
38.3214	0.35113		36.0672	0.2647										31.79	0.30516		41.0958	0.29753
39.7664	0.34319		35.0846	0.28061										41.327	0.2979		32.368	0.18675
40.6912	0.31315		42.3674	0.26705										35.3158	0.22487		34.5644	0.31555
42.3674	0.37546		38.9572	0.25876										35.836	0.20506		37.57	0.17279
42.4252	0.37284		40.4022	0.25572										33.1772	0.34245		35.0846	0.12796
41.4426	0.32953		38.8416	0.29658										39.7086	0.29509		34.6222	0.28516
43.1766	0.37377		38.2058	0.25089										31.9634	0.19507		33.1772	0.17189
36.5296	0.33241		31.8478	0.19485										37.9746	0.28171		29.5358	0.20768
41.6738	0.38078		42.5986	0.28635										41.5004	0.30937		35.258	0.1665
37.4544	0.39262		34.391	0.26888										41.5004	0.30937		37.5122	0.30626
34.3332	0.31947		38.8994	0.13723										37.9168	0.33212		42.5408	0.31329
39.4196	0.28247		36.9342	0.23137										38.3214	0.24996		36.7608	0.34034
38.2058	0.35077		37.0498	0.24743										37.4544	0.3364		38.4948	0.28848
41.327	0.35508		46.6446	0.2643										36.7608	0.28248		32.7148	0.24354
42.6564	0.37553		39.3618	0.25021										39.5352	0.29914		38.6104	0.29378
43.928	0.34108		46.7602	0.30011										42.0784	0.36639		34.4488	0.27843
40.6334	0.3287		37.0498	0.23564										39.304	0.20808		34.391	0.21862
44.0436	0.35691		34.2176	0.28714										39.5352	0.28842		31.3276	0.19751
38.2636	0.31427		35.6626	0.25121										33.6974	0.24632		32.657	0.24287
36.703	0.33195		25.2586	0.26706										33.1194	0.19397		32.5414	0.2254
39.4196	0.35123		46.7024	0.28268										34.5066	0.24308		30.9808	0.17795
37.3966	0.34783		39.7086	0.25132										34.1598	0.31747		30.345	0.17413
36.9342	0.34561		37.57	0.27365										33.7552	0.28339		33.8708	0.25517
36.8186	0.34713		38.0324	0.28482										33.235	0.25679		36.2984	0.14445
42.8876	0.33058		39.8242	0.2758										32.7726	0.29588		41.2114	0.36228
36.992	0.32878		32.079	0.19578										44.9106	0.32056		43.061	0.28144
43.6968	0.3584		35.9516	0.26167										35.8938	0.307		35.9516	0.23974
45.084	0.36259		33.7552	0.2385										33.1194	0.22245		28.8422	0.17893
42.0784	0.37557		37.281	0.27929										41.3848	0.30623		32.7148	0.27593
44.217	0.3678		38.4948	0.28195										34.68	0.22315		37.9168	0.27504
39.4774	0.38138		41.616	0.30178										37.8012	0.28251		40.0554	0.2845
34.0442	0.37855		35.836	0.25168										37.1654	0.20985		36.5874	0.28844
41.7894	0.42061		23.9292	0.22874										33.7552	0.297		36.8186	0.29316
43.8702	0.38262		44.217	0.25111										35.4314	0.30344		40.5178	0.29872
41.6738	0.36318		41.2114	0.25349										44.217	0.32498		33.6396	0.21643
40.46	0.34047		37.0498	0.28229										37.3966	0.32157		34.5644	0.31845
39.7664	0.36466		33.8708	0.25449										29.4202	0.21657		35.3158	0.23141
34.9112	0.37403		34.8534	0.24672										38.0902	0.24504		32.7148	0.17049
38.4948	0.34788		36.125	0.26492										39.4774	0.33323		35.3158	0.25263
42.1362	0.35422		38.9572	0.2735										35.2002	0.31649		36.414	0.23894
43.4078	0.3837		44.9106	0.27916										36.6452	0.28798		34.2754	0.28021
31.6166	0.15687		33.235	0.25352										33.813	0.3614		30.5184	0.27313
40.6334	0.33492		33.9864	0.22864										39.7664	0.29681		32.8304	0.23168
41.2114	0.36334		33.1194	0.19288										38.8994	0.32219		35.6048	0.30899
36.7608	0.28494		36.2984	0.25868										46.5868	0.29208		34.1598	0.24171
41.905	0.33679		44.1014	0.22476										37.6856	0.29377		31.212	0.27692
43.9858	0.3585		39.0728	0.27182										39.882	0.30261		30.1716	0.2952
39.304	0.36238		28.9578	0.32793										41.1536	0.30615		34.8534	0.04742
43.061	0.35222		40.2866	0.25563										34.1598	0.16394		24.854	0.1201
38.8994	0.36582		37.6278	0.26505										33.8708	0.31679		38.8416	0.27659
40.3444	0.33641		41.6738	0.26506										39.882	0.30364		39.3618	0.30718
39.6508	0.3067		39.015	0.29579										36.0094	0.29539		35.0268	0.19664
42.1362	0.39138		35.836	0.24604										38.437	0.29869		33.4662	0.25802
34.8534	0.36801		32.8882	0.32594										41.8472	0.32617		46.0088	0.21066
35.0268	0.37885		39.4196	0.2684										39.304	0.32457		38.0324	0.29286
40.1132	0.33829		40.3444	0.25785										30.056	0.25481		33.8708	0.33899
39.1306	0.38102		36.4718	0.24224										30.1138	0.29675		34.6222	0.28159
36.7608	0.33307		38.8416	0.26258										34.7956	0.27768		32.946	0.19758
41.5004	0.33681		47.974	0.29061										36.1828	0.30491		38.8994	0.32868
47.2804	0.36622		44.795	0.27466										39.015	0.29504		32.5414	0.27386
37.3388	0.38765		38.726	0.27343										38.6104	0.31503		37.1076	0.26872
42.8298	0.36255		37.3388	0.25611										45.084	0.36318		33.8708	0.20565
34.4488	0.35263		37.3388	0.25666										33.235	0.29251		36.9342	0.0762
38.2636	0.27879		42.1362	0.26188										38.0324	0.31714		33.235	0.29269
36.3562	0.30475		38.7838	0.25784										34.969	0.20844		36.5296	0.24579
40.9802	0.33715		39.593	0.23472										39.882	0.30624		32.5992	0.20709
43.5234	0.34336		43.2922	0.2647										40.2866	0.30168		35.2002	0.28554
36.992	0.33436		47.2226	0.28174										45.4308	0.32313		35.3158	0.30028
38.5526	0.29823		37.57	0.287										37.859	0.30664		39.0728	0.30803
42.0206	0.36954		37.1076	0.27402										34.2754	0.26754		30.5184	0.18094
40.6334	0.35385		40.5756	0.25024										46.818	0.31374		33.2928	0.22488
38.148	0.37212		41.905	0.30927										31.5588	0.18677		29.0734	0.26206
42.772	0.36386		38.7838	0.25675										27.0504	0.22449		36.7608	0.25077
35.7204	0.31759		33.235	0.36963										37.3388	0.2738		37.9168	0.24738
48.0896	0.40136		42.8876	0.27222										30.345	0.22307		32.946	0.22266
37.8012	0.3295		34.5644	0.24199										35.0268	0.26009		37.3966	0.06169
37.8012	0.34394		41.2114	0.20985										40.9224	0.28955		32.1368	0.28219
49.997	0.3686		50.8062	0.20483										37.9746	0.30055		42.4252	0.29268
38.3214	0.34642		43.7546	0.25495										41.6738	0.26249		40.8068	0.2147
39.1306	0.35997		38.9572	0.28329										37.3388	0.30974		40.8068	0.2147
42.6564	0.3924		41.6738	0.19615										40.4022	0.31999		36.5296	0.34482
41.2114	0.37754		39.9976	0.27557										38.6682	0.30686		38.4948	0.26306
40.8068	0.36602		40.6912	0.28457										32.0212	0.2734		29.1312	0.14212
39.0728	0.34896		38.7838	0.25791										36.8186	0.29571		32.5414	0.21179
37.8012	0.3564		41.0958	0.26164										35.3736	0.33367		40.6334	0.29964
39.4774	0.36195		40.5756	0.28566										41.9628	0.32584		33.1772	0.3229
38.8416	0.31374		40.749	0.22751										38.2636	0.30047		35.258	0.2857
45.5464	0.36097		40.5756	0.30966										38.4948	0.33529		36.4718	0.35948
37.8012	0.31946		31.6166	0.23898										39.4196	0.27956		36.1828	0.27208
46.1822	0.354		29.9982	0.28167										39.9976	0.2957		27.5128	0.13184
41.9628	0.36049		41.7894	0.2561										41.038	0.30656		36.5296	0.22068
40.4022	0.37841		31.9634	0.2644										39.2462	0.29236		33.4662	0.25937
44.9684	0.35264		37.5122	0.2632										34.5644	0.2649		33.0038	0.29075
40.749	0.33492		40.8646	0.30778										35.4314	0.31091		39.8242	0.28895
38.8994	0.33353		41.1536	0.26882										34.7956	0.23767		52.4246	0.31938
40.5178	0.32507		37.859	0.23584										36.8186	0.29286		34.6222	0.17413
38.4948	0.36114		36.414	0.27407										33.235	0.34624		32.079	0.28966
44.9684	0.33363		36.2984	0.27072										42.3096	0.28204		38.9572	0.18171
35.7782	0.31222		40.46	0.26722										38.7838	0.3236		26.299	0.18593
39.7086	0.36122		49.0722	0.30116										40.171	0.3039		41.7316	0.24256
41.6738	0.32654		40.5178	0.23913										35.9516	0.29435		39.304	0.25467
38.8994	0.35219		33.9864	0.25392										36.5874	0.20366		34.2176	0.2685
38.2058	0.331		39.1306	0.25759										45.0262	0.32558		36.0672	0.32957
41.2692	0.33032		40.0554	0.20178										32.4836	0.28469		31.5588	0.22218
29.189	0.33933		46.9336	0.27965										49.6502	0.25865		26.1834	0.13023
42.4252	0.32288		39.9398	0.26084										37.3388	0.30548		34.7956	0.21702
39.1306	0.36683		37.281	0.23838										40.5178	0.3398		37.3388	0.31649
38.726	0.33237		42.2518	0.22408										31.3854	0.14531		33.3506	0.19768
43.0032	0.38318		38.7838	0.25225										39.8242	0.30176		33.8708	0.22999
41.7894	0.33526		36.7608	0.24348										33.7552	0.24316		36.703	0.27024
41.3848	0.3575		38.4948	0.25362										34.2176	0.281		36.4718	0.23916
36.992	0.34016		31.9056	0.25044										33.6974	0.21365		30.634	0.10579
40.2866	0.37393		45.5464	0.24539										39.4196	0.26157		34.8534	0.2871
41.8472	0.37734		48.552	0.29225										37.3966	0.31029		35.0268	0.35691
43.35	0.34659		36.0672	0.2501										31.79	0.28919		33.3506	0.30134
38.3214	0.36654		41.9628	0.27212										36.4718	0.30578		39.304	0.29464
47.974	0.36296		40.2866	0.28106										21.386	0.13151		31.9634	0.23424
44.5638	0.35081		34.969	0.24445										37.9168	0.26438		40.3444	0.03242
39.3618	0.31688		34.969	0.25536										41.038	0.30822		32.1946	0.25334
37.9746	0.3288		41.9628	0.25027										35.6626	0.28404		40.4022	0.32847
42.9454	0.36734		47.685	0.01369										41.1536	0.29166		33.1194	0.2052
39.882	0.35828		36.414	0.20758										43.6968	0.35031		35.0268	0.1951
42.6564	0.32797		39.593	0.20345										35.2002	0.29622		28.322	0.04035
37.6856	0.3209		35.258	0.25781										41.616	0.28466		43.2344	0.29293
40.9224	0.31308		42.5408	0.26556										44.1014	0.27585		39.7664	0.29605
49.5924	0.35522		38.3214	0.29433										39.2462	0.29936		35.2002	0.23451
40.3444	0.34541		37.7434	0.28512										31.501	0.08807		37.8012	0.30459
34.2176	0.31756		33.2928	0.24925										38.0902	0.29877		35.0846	0.27373
42.8298	0.3379		39.6508	0.23373										40.8646	0.2977		35.0268	0.2129
40.4022	0.34956		40.6334	0.27956										38.0902	0.30173		36.992	0.32414
41.327	0.36311		36.414	0.20931										36.9342	0.22859		41.1536	0.27299
41.038	0.357		34.2176	0.26164										29.8826	0.11625		35.2002	0.23368
37.1076	0.38204		39.9398	0.23411										36.0672	0.25304		39.3618	0.30511
42.5408	0.36301		40.5756	0.29255										33.4662	0.22887		32.8882	0.27603
40.6912	0.30953		43.35	0.27637										31.7322	0.30049		39.1306	0.30807
38.8994	0.34021		42.6564	0.26933										35.7204	0.30009		34.8534	0.30122
45.5464	0.34059		44.9684	0.29034										38.8994	0.30576		33.9286	0.24313
42.9454	0.35083		44.5638	0.26013										40.8646	0.29502		35.547	0.31172
34.9112	0.32601		43.9858	0.26903										37.57	0.30944		30.4028	0.25786
41.8472	0.41267		35.7782	0.25544										38.9572	0.30156		43.1188	0.29999
42.5408	0.36384		42.2518	0.29392										36.1828	0.31921		36.8764	0.29492
41.5004	0.36154		37.7434	0.23509										50.8062	0.2537		37.8012	0.24472
47.107	0.36925		36.992	0.26535										32.4258	0.16912		34.5644	0.27759
40.5178	0.35259		39.4196	0.22384										44.506	0.30758		36.8764	0.23155
37.9168	0.40072		43.4078	0.27681										31.2698	0.24789		36.3562	0.20697
41.7316	0.36902		44.1014	0.22494										42.8876	0.35554		32.8304	0.15144
41.7316	0.33271		38.9572	0.24176										39.9398	0.24312		33.4084	0.16901
39.8242	0.33554		34.7378	0.22796										42.8298	0.28401		31.0386	0.18504
36.7608	0.34987		30.5184	0.35084										38.0324	0.27993		32.5414	0.23129
40.2288	0.3656		44.1014	0.23053										39.882	0.35844		29.5358	0.09712
45.0262	0.34886		45.0262	0.27221										38.6104	0.24204		32.946	0.20291
45.1996	0.35846		46.2978	0.29282										34.969	0.29224		37.859	0.30862
39.2462	0.4055		36.6452	0.27413										36.9342	0.27004		36.9342	0.2716
36.6452	0.30979		47.5694	0.27913										39.9398	0.33358		36.8186	0.21727
34.9112	0.30642		37.2232	0.2629										37.2232	0.26018		30.634	0.19316
35.4314	0.32133		35.0268	0.2515										33.1194	0.27398		33.524	0.28826
37.5122	0.35415		41.0958	0.26717										44.6216	0.32387		38.0902	0.08203
38.437	0.25919		42.772	0.2683										32.657	0.3283		28.4376	0.1812
43.639	0.32295		36.414	0.29871										38.3792	0.28505		35.4892	0.27975
39.593	0.34579		33.0038	0.28663										34.8534	0.27952		31.212	0.18362
41.327	0.32619		36.8186	0.26683										37.1654	0.27917		27.166	0.05653
41.2114	0.33822		38.6682	0.25719										32.079	0.29163		36.9342	0.27368
34.6222	0.36691		29.3624	0.27402										35.6048	0.24148		33.8708	0.17304
36.8764	0.32556		31.2698	0.29332										40.5756	0.32493		37.57	0.3108
40.171	0.31371		38.437	0.2758										37.3966	0.31575		33.2928	0.22672
36.2406	0.30882		34.2176	0.2749										39.6508	0.28386		38.6682	0.2489
35.4314	0.29634		36.992	0.26467										39.3618	0.30017		40.6912	0.30602
39.593	0.38086		50.7484	0.23718										32.079	0.29259		40.1132	0.30367
38.8416	0.3685		39.3618	0.28878										32.7726	0.17929		29.3046	0.18031
37.7434	0.31602		37.2232	0.2328										33.3506	0.25566		37.7434	0.13693
36.703	0.39157		38.7838	0.28884										31.0964	0.19192		38.2058	0.04966
46.4134	0.37135		34.2754	0.25087										43.7546	0.33809		30.1138	0.24206
46.4134	0.35244		39.304	0.248										26.7614	0.09465		40.0554	0.28027
40.8068	0.35671		45.1418	0.20737										33.1772	0.20101		38.6682	0.29188
40.1132	0.35176		38.6682	0.26249										36.3562	0.23067		31.3276	0.18377
36.9342	0.32302		38.9572	0.22783										34.3332	0.18956		42.8298	0.2125
39.593	0.35811		42.5986	0.26463										37.281	0.22835		34.6222	0.28933
46.2978	0.36678		36.703	0.30622										30.634	0.21081		38.0902	0.20024
42.8298	0.35489		29.3624	0.24147										36.9342	0.24595		28.322	0.31974
42.772	0.4014		37.4544	0.23486										40.2866	0.30093		35.836	0.23867
48.9566	0.36237		41.327	0.28646										29.8826	0.20788		36.992	0.26657
40.2288	0.35936		34.7956	0.2425										31.2698	0.27176		44.795	0.25111
41.5582	0.33845		41.905	0.27029										40.5756	0.28208		36.0094	0.31122
42.5986	0.32398		37.9168	0.2659										30.5762	0.22432		32.5414	0.20082
38.3792	0.34907		41.0958	0.27045										40.2288	0.30412		35.8938	0.22017
39.5352	0.34616		38.7838	0.26534										42.0206	0.29276		37.3388	0.26286
40.749	0.3625		30.5762	0.26038										46.818	0.30041		42.0206	0.28574
38.2058	0.32463		34.5066	0.2529										37.6278	0.26586		34.969	0.08602
38.148	0.33416		48.2052	0.24355										39.304	0.32371		32.8304	0.2859
41.7316	0.37759		32.1946	0.31564										39.4196	0.28672		32.657	0.22957
41.5582	0.37357		41.616	0.26583										34.5644	0.24867		35.1424	0.17911
45.7198	0.33797		35.8938	0.2705										43.9858	0.28757		33.524	0.2277
37.3388	0.35536		32.1368	0.27129										38.2636	0.28887		30.8074	0.27289
40.1132	0.34876		38.437	0.21718										37.3388	0.29642		38.0324	0.23844
38.437	0.33755		46.9914	0.25997										34.7956	0.28614		45.1996	0.2651
39.1306	0.32231		38.4948	0.30932										33.524	0.26715		36.5874	0.20633
39.304	0.39071		36.5874	0.21501										41.8472	0.32312		31.8478	0.16003
31.7322	0.34115		39.593	0.23711										38.437	0.3072		31.79	0.19332
39.8242	0.35945		36.414	0.22										41.3848	0.3293		35.4314	0.17365
42.4252	0.36165		39.5352	0.25448										41.327	0.24325		36.6452	0.31707
38.3214	0.36112		46.0666	0.26087										36.2406	0.29567		35.2002	0.23395
41.0958	0.37592		38.5526	0.24014										36.2406	0.29645		38.3214	0.2783
36.2406	0.34064		35.1424	0.23094										34.68	0.26154		34.5066	0.2031
40.749	0.34306		36.3562	0.26157										40.9802	0.27015		41.2114	0.27441
35.3736	0.32522		40.749	0.31805										40.171	0.30562		37.9168	0.33178
39.015	0.3305		33.3506	0.28136										39.015	0.24399		29.7092	0.05375
45.4308	0.35462		34.5644	0.26236										33.4084	0.29046		33.4084	0.26581
38.7838	0.3169		36.4718	0.22712										38.2058	0.33269		34.5066	0.28171
36.8186	0.31617		35.6048	0.18558										41.0958	0.31364		30.1138	0.27193
43.8702	0.35556		40.171	0.29587										32.7726	0.24362		40.9802	0.31047
41.1536	0.3679		39.4774	0.25009										26.0678	0.21245		37.281	0.14192
38.5526	0.31798		38.0324	0.28897										31.6166	0.19973		29.7092	0.17518
35.0268	0.31124		37.9168	0.21669										35.0846	0.29518		42.2518	0.31331
38.9572	0.3741		43.5812	0.27697										43.928	0.32557		38.4948	0.32848
43.6968	0.32562		29.5936	0.2174										36.5874	0.33822		33.4662	0.29902
43.35	0.36827		38.0902	0.25756										40.2866	0.32591		30.6918	0.19351
39.8242	0.33706		43.2922	0.26713										33.0616	0.29694		35.6048	0.31396
38.6104	0.33803		36.414	0.20106										30.634	0.24019		32.657	0.21401
45.2574	0.34981		38.6104	0.23401										44.9106	0.34008		32.368	0.19235
34.969	0.30744		33.9864	0.29123										37.6856	0.35405		38.0324	0.29051
38.9572	0.34389		36.8186	0.24581										31.3854	0.33949		29.1312	0.19446
41.2692	0.34773		40.2866	0.26082										30.2294	0.27771		36.5874	0.25696
40.8646	0.30808		26.5302	0.27061										37.9746	0.21731		40.0554	0.26522
42.6564	0.35926		33.0616	0.24042										36.0094	0.28124		35.3736	0.24813
38.8994	0.33594		31.212	0.3285										40.171	0.32783		36.5874	0.22184
45.2574	0.3592		35.258	0.22345										40.171	0.32783		33.9864	0.20388
31.6744	0.37884		33.6396	0.24817										39.8242	0.28283		35.4892	0.32193
35.3736	0.29542		32.8304	0.18401										35.3736	0.29401		32.657	0.27315
38.8416	0.3709		35.547	0.25159										37.6856	0.25335		28.033	0.05987
43.5812	0.35725		45.4886	0.28864										31.212	0.29071		32.5992	0.26483
40.2866	0.36277		36.414	0.27545										42.7142	0.29247		38.5526	0.34356
34.2754	0.38801		42.1362	0.22371										36.5874	0.29161		37.0498	0.25114
41.0958	0.32968		38.3792	0.27525										40.8068	0.25173		29.5936	0.28176
39.9976	0.34671		40.5178	0.23102										34.0442	0.13223		32.5414	0.14186
31.0964	0.39878		38.148	0.28637										39.7086	0.3316		38.3214	0.21992
42.0206	0.35793		42.6564	0.26261										34.102	0.25725		35.3736	0.32056
39.4196	0.34484		30.1138	0.27895										32.4258	0.26897		33.9864	0.25273
40.9224	0.34514		41.5582	0.17777										36.8186	0.32625		32.4836	0.29146
44.795	0.3659		37.7434	0.28113										39.9976	0.30375		37.7434	0.33516
38.4948	0.33331		42.1362	0.29136										36.6452	0.28789		32.8882	0.22808
38.8994	0.39707		40.2288	0.25263										28.9578	0.26217		30.8074	0.22021
38.0902	0.35498		40.2866	0.243										41.327	0.3103		40.1132	0.31241
37.2232	0.33439		42.4252	0.24833										30.1138	0.25678		34.68	0.32147
35.9516	0.33477		40.1132	0.27336										33.1772	0.18199		33.0616	0.18519
39.4774	0.31792		44.3904	0.28358										37.7434	0.31085		33.5818	0.2615
41.1536	0.36732		36.3562	0.23967										38.5526	0.28354		37.5122	0.28713
41.2114	0.37477		37.3388	0.25153										46.1822	0.18104		34.6222	0.19232
42.3674	0.37729		36.0672	0.25561										26.3568	0.28747		39.9398	0.25838
47.396	0.3756		42.483	0.28548										43.1188	0.25947		34.969	0.27508
43.639	0.35969		40.9224	0.26225										38.3792	0.30338		35.2002	0.25739
44.6794	0.34389		33.8708	0.22718										33.4662	0.24378		27.6284	0.27665
46.3556	0.35196		31.212	0.29917										41.6738	0.31859		34.9112	0.10852
40.6334	0.31938		33.2928	0.29808										34.391	0.21862		31.7322	0.27669
43.5234	0.32612		40.8646	0.2878										32.5414	0.25206		38.3792	0.09143
39.4196	0.34285		40.5178	0.30579										35.3158	0.29329		38.437	0.29499
37.9746	0.33592		45.3152	0.27781										28.033	0.1998		33.4084	0.24117
42.4252	0.37938		34.0442	0.3049										41.2692	0.26679		36.8186	0.1956
32.946	0.30716		44.1592	0.27948										46.0666	0.30823		35.7204	0.23382
37.9168	0.33514		33.813	0.29583										35.836	0.29569		34.969	0.20576
42.8298	0.34527		35.2002	0.25575										39.2462	0.30488		37.8012	0.26413
44.8528	0.38214		37.4544	0.2556										43.928	0.30725		34.2176	0.30291
33.235	0.36134		40.9802	0.27268										38.6104	0.28395		41.7316	0.29619
43.4656	0.39613		36.2984	0.20624										36.1828	0.29664		34.3332	0.25956
41.7316	0.32681		34.2176	0.26676										30.8074	0.33667		32.7148	0.18315
41.7316	0.38458		35.0846	0.24495										34.7956	0.30514		35.0268	0.22348
39.7086	0.41494		35.7204	0.26256										36.703	0.3125		37.1076	0.1617
36.2984	0.40834		43.7546	0.28735										35.258	0.31798		35.258	0.23497
34.2754	0.35416		42.2518	0.19837										52.6558	0.19251		30.1138	0.25036
37.859	0.41536		43.061	0.24889										32.657	0.27255		37.8012	0.3123
38.8994	0.33343		32.368	0.26215										39.6508	0.30804		33.5818	0.21419
43.2922	0.36133		41.5582	0.29006										33.6396	0.28156		39.304	0.2897
42.6564	0.39532		36.125	0.25751										35.4314	0.3143		35.6048	0.24037
44.6794	0.34216		44.4482	0.27509										51.731	0.31078		33.4662	0.24436
36.8764	0.32581		42.8876	0.23885										36.8186	0.3337		37.1654	0.28887
40.171	0.36879		41.5004	0.25919										33.0038	0.34664		27.2816	0.21401
46.5868	0.36067		38.437	0.25249										39.8242	0.33349		31.6744	0.28311
38.437	0.31859		37.0498	0.23334										36.7608	0.33822		41.8472	0.29245
34.969	0.3254		34.102	0.26485										37.1654	0.31004		30.2294	0.20704
38.8416	0.33736		37.1076	0.27031										42.5986	0.02494		35.0268	0.27621
34.969	0.31061		40.749	0.25795										31.9056	0.31362		34.391	0.19909
44.0436	0.35379		28.7266	0.25543										39.4774	0.29407		31.0386	0.15817
39.1884	0.33465		37.9746	0.24602										39.6508	0.24745		38.4948	0.2988
41.6738	0.34876		37.5122	0.2813										32.657	0.28327		31.0964	0.20025
40.8068	0.34354		39.9976	0.25451										36.2984	0.2775		35.3158	0.31863
38.726	0.38615		34.6222	0.35533										41.616	0.30824		28.7844	0.21958
46.1822	0.34976		44.0436	0.26286										36.5296	0.25652		31.8478	0.19636
36.2984	0.33656		38.0324	0.27573										32.368	0.24418		40.8646	0.27452
44.9684	0.38622		32.8304	0.24317										28.5532	0.25729		34.3332	0.21736
38.0902	0.35417		43.928	0.27574										41.6738	0.28497		33.0616	0.32227
44.1592	0.344		31.1542	0.22913										37.281	0.27372		32.079	0.23411
43.5234	0.43402		42.1362	0.26489										33.3506	0.18374		44.9684	0.29425
39.4774	0.34904		40.4022	0.25279										31.6744	0.24872		41.8472	0.29027
40.1132	0.32847		43.2344	0.28132										35.6626	0.30911		30.1716	0.26909
40.9224	0.33834		37.2232	0.23118										30.1716	0.27029		36.414	0.28697
41.327	0.37361		39.9976	0.27744										37.4544	0.29538		32.8882	0.27575
44.1014	0.37411		41.5004	0.24993										34.7956	0.20548		38.6104	0.29868
38.726	0.33801		35.8938	0.26154										31.9634	0.19127		44.1592	0.30007
39.8242	0.34096		38.0324	0.24165										40.9802	0.29613		40.171	0.30463
41.8472	0.35605		34.68	0.23744										37.5122	0.30039		32.1946	0.06036
40.5756	0.37073		37.7434	0.26215										32.4836	0.27616		36.6452	0.27251
47.107	0.35349		44.795	0.2585										32.4836	0.26242		36.0672	0.23348
40.3444	0.35859		41.2114	0.24177										39.2462	0.32418		34.969	0.30126
44.9684	0.36268		42.483	0.27312										42.3096	0.30356		40.2866	0.19688
37.2232	0.33649		37.9746	0.29829										35.0846	0.30893		39.5352	0.29456
35.7204	0.34318		42.0206	0.27268										37.1654	0.28931		33.3506	0.28475
44.795	0.36303		35.9516	0.26695										53.8696	0.2996		42.8876	0.26339
39.882	0.32945		39.9976	0.26076										36.7608	0.2196		33.3506	0.02289
35.7782	0.33931		36.3562	0.26406										37.9746	0.27306		31.2698	0.28968
38.8994	0.38877		40.171	0.27093										39.3618	0.32083		35.4892	0.18973
41.3848	0.34372		37.5122	0.28315										32.946	0.28178		33.4084	0.29056
39.015	0.33802		41.1536	0.25375										31.6744	0.28198		35.9516	0.28017
46.1822	0.39974		37.0498	0.25727										36.5296	0.26747		41.2692	0.31596
41.0958	0.34144		34.1598	0.31415										31.9056	0.27207		30.7496	0.11425
38.437	0.34383		37.281	0.30232										42.8298	0.34859		31.2698	0.18179
44.3326	0.39974		35.0268	0.21121										35.9516	0.31836		35.6626	0.27252
35.7782	0.32114		36.992	0.27005										35.9516	0.31836		34.8534	0.24554
39.7086	0.36605		34.5066	0.25009										40.6334	0.2913		29.3046	0.21066
38.2058	0.3876		42.6564	0.25564										37.6856	0.27624		27.2816	0.09612
36.992	0.38241		39.1884	0.26911										38.8416	0.28235		35.3158	0.27599
39.4774	0.3063		43.35	0.28553										29.9982	0.19211		36.0094	0.36403
43.4078	0.36444		36.125	0.23176										40.749	0.298		35.547	0.28908
41.5582	0.32754		47.8584	0.2864										30.8652	0.16193		31.0964	0.15823
39.8242	0.30988		39.1884	0.27562										35.258	0.31229		39.015	0.24508
38.3792	0.34745		35.6048	0.25906										36.125	0.27508		29.5936	0.30751
35.836	0.36884		47.685	0.28596										40.749	0.33593		44.795	0.32966
38.2636	0.3012		42.483	0.28666										38.8416	0.33718		37.3966	0.28072
38.8994	0.39464		36.5296	0.28417										43.2344	0.29642		36.5296	0.29021
37.6856	0.3384		45.373	0.17035										36.6452	0.25278		30.056	0.20508
44.3904	0.37675		43.1766	0.2834										29.0734	0.30263		29.8248	0.24522
36.992	0.31849		34.2176	0.25225										38.437	0.34062		31.79	0.21286
39.4774	0.35134		38.2058	0.28386										38.148	0.28577		39.304	0.28482
38.3792	0.36807		35.0268	0.25679										38.2636	0.3026		38.0902	0.22574
37.7434	0.38517		35.3158	0.325										35.4314	0.27088		37.3388	0.27794
39.0728	0.35867		38.6104	0.28216										35.258	0.22838		37.57	0.16563
35.4892	0.40163		40.2866	0.28468										31.6166	0.21676		33.9864	0.23885
40.8068	0.3628		47.5694	0.25816										39.2462	0.27751		34.8534	0.2064
42.5986	0.34488		35.258	0.26508										38.5526	0.33632		36.5296	0.31679
36.7608	0.33703		49.5924	0.24863										33.1194	0.07245		34.5644	0.2447
45.6042	0.37134		40.2866	0.25153										36.9342	0.22487		33.235	0.22842
38.9572	0.34216		38.437	0.27247										41.6738	0.30715		34.1598	0.24698
43.6968	0.35195		40.0554	0.24433										30.8074	0.26178		43.1188	0.30343
41.038	0.37464		42.8876	0.27459										33.0038	0.29653		37.1654	0.2995
38.2058	0.30956		39.4774	0.26384										49.0144	0.22064		27.8596	0.19748
43.7546	0.3199		35.836	0.21637										40.749	0.25045		36.7608	0.26839
41.5582	0.34888		34.9112	0.26441										37.57	0.29299		42.3674	0.2826
40.5178	0.34824		46.4134	0.25256										40.2288	0.31356		33.0616	0.15804
42.2518	0.32035		39.9398	0.28031										33.5818	0.25944		32.079	0.32521
31.9056	0.32879		43.061	0.27263										37.6856	0.31733		33.235	0.29386
46.24	0.40856		40.6334	0.25611										31.501	0.18842		41.5582	0.2345
40.2866	0.3639		41.2692	0.2391										34.102	0.30106		30.5184	0.10716
44.6794	0.38126		40.749	0.20773										37.9168	0.35086		32.8882	0.23841
38.0324	0.33021		39.9976	0.26988										33.4084	0.23495		33.9286	0.21678
42.5408	0.38651		41.2692	0.26694										37.1076	0.25825		33.8708	0.18797
38.0324	0.3636		36.3562	0.27387										37.6278	0.31284		34.3332	0.24416
35.2002	0.36202		43.4078	0.28835										35.2002	0.26964		36.414	0.14837
35.1424	0.3505		34.2754	0.2473										35.7204	0.32761		38.726	0.2949
43.4656	0.3613		36.703	0.26159										35.3736	0.25982		35.3736	0.30254
38.5526	0.35103		26.299	0.2476										37.859	0.30077		32.2524	0.18945
43.1188	0.3536		35.258	0.29142										32.8882	0.2461		36.703	0.26544
40.5178	0.38294		40.4022	0.23665										29.8826	0.11634		37.9168	0.27997
42.5986	0.33751		35.0846	0.23772										35.258	0.30898		36.8186	0.27681
39.8242	0.35096		30.1716	0.28873										34.2176	0.27298		34.4488	0.26313
43.928	0.34884		37.1654	0.27946										36.8186	0.2625		32.3102	0.31182
40.8646	0.36182		36.992	0.26946										29.0156	0.29704		35.0268	0.11374
40.8646	0.366		45.4308	0.26184										30.923	0.26087		39.9976	0.19467
42.4252	0.35282		32.7148	0.24508										33.4084	0.31067		34.969	0.23127
31.9056	0.31331		39.1884	0.22487										34.7956	0.28145		37.5122	0.25819
39.4774	0.3532		34.6222	0.26435										34.9112	0.25907		33.2928	0.33094
40.46	0.34		36.3562	0.23469										30.345	0.25618		37.2232	0.25019
33.1194	0.37472		36.3562	0.28313										32.3102	0.217		36.1828	0.323
41.0958	0.38302		36.703	0.26534										34.9112	0.29566		31.3276	0.1757
35.3736	0.38443		47.5694	0.29689										29.9982	0.20544		40.2288	0.27061
38.7838	0.34547		38.2058	0.27937										41.905	0.28917		36.414	0.30817
41.7894	0.36903		44.3904	0.29603										32.7726	0.14914		29.0734	0.18815
43.8124	0.3786		38.2058	0.2739										35.4314	0.33112		37.281	0.22735
39.7086	0.35756		32.7148	0.35763										37.5122	0.31396		32.079	0.09435
39.593	0.36311		36.992	0.28715										38.8994	0.25723		33.9864	0.14364
39.8242	0.35386		39.5352	0.26441										35.7782	0.28625		33.0616	0.26362
43.1766	0.37979		40.4022	0.24123										28.8422	0.08054		34.5644	0.30956
43.0032	0.34403		31.9056	0.22318										33.9864	0.20017		34.0442	0.30866
40.9224	0.35008		43.0032	0.24699										34.3332	0.21968		40.5178	0.21902
39.4196	0.318		36.4718	0.26948										29.8248	0.23466		34.2754	0.23825
44.506	0.35625		40.46	0.24407										34.2176	0.24086		32.4258	0.29477
42.3096	0.35532		44.2748	0.25126										35.4314	0.25742		33.4084	0.24474
45.4308	0.31624		41.5004	0.24814										40.8068	0.28416		40.4022	0.2051
41.7316	0.39502		37.6278	0.20621										29.9982	0.17052		43.8702	0.30416
39.593	0.3546		36.992	0.32584										40.2866	0.26353		34.9112	0.2164
45.4308	0.34518		33.8708	0.28213										32.8882	0.30379		23.5246	0.14737
41.5004	0.30619		38.2636	0.28265										32.657	0.1833		33.9286	0.22588
49.7658	0.39035		35.836	0.27234										38.4948	0.29225		37.1654	0.32852
40.0554	0.3552		36.7608	0.27458										32.8304	0.26837		33.1194	0.23722
44.7372	0.41713		30.923	0.26768										44.8528	0.27726		39.3618	0.27166
40.749	0.36132		36.5874	0.24129										38.6682	0.28983		36.0094	0.23647
35.4314	0.31386		44.1014	0.28149										25.432	0.25737		40.2866	0.30478
41.9628	0.32298		37.5122	0.25019										33.524	0.27469		31.8478	0.25213
34.102	0.32667		32.0212	0.26758										37.0498	0.25471		31.4432	0.2017
41.5004	0.34486		37.5122	0.2549										31.3854	0.21344		32.5414	0.19201
39.9398	0.31181		32.5414	0.28294										39.304	0.31828		36.9342	0.25202
43.639	0.34227		39.9976	0.29656										33.2928	0.2933		40.4022	0.32445
44.506	0.37408		48.9566	0.30231										36.8764	0.23898		29.1312	0.20443
37.3388	0.34698		39.8242	0.27215										37.57	0.29821		24.565	0.06933
42.5986	0.3683		45.8932	0.32999										33.2928	0.32534		32.4258	0.28549
36.5296	0.38415		37.281	0.26744										39.882	0.30595		40.2866	0.29928
40.4022	0.33624		35.836	0.24797										34.7956	0.30494		33.4662	0.26006
41.9628	0.35513		32.8304	0.24055										34.3332	0.32014		35.0846	0.2122
38.437	0.36552		35.8938	0.27195										34.7378	0.22178		37.8012	0.28043
38.7838	0.35036		42.1362	0.32484										39.593	0.31092		42.0206	0.27771
40.8646	0.36542		42.9454	0.21521										39.593	0.31092		30.9808	0.21494
41.038	0.35604		45.2574	0.27187										37.6278	0.20782		39.8242	0.31805
40.5178	0.32394		33.0038	0.18727										36.0672	0.31053		33.4084	0.19115
38.8416	0.33723		42.4252	0.25664										33.3506	0.17419		36.1828	0.26387
36.1828	0.32327		33.6396	0.28709										33.5818	0.25086		33.0038	0.18357
43.4656	0.31259		45.662	0.28134										35.7782	0.23548		33.2928	0.28434
43.639	0.34559		38.437	0.286										37.281	0.29823		30.056	0.15085
40.4022	0.34124		36.414	0.26524										36.703	0.30473		31.6166	0.24471
40.0554	0.35554		40.5756	0.24911										35.3158	0.29495		36.992	0.29666
39.0728	0.37878		36.2984	0.27062										31.5588	0.1847		45.5464	0.29705
40.9224	0.36231		39.1306	0.27849										42.3096	0.27734		40.0554	0.29196
45.0262	0.33883		38.0902	0.21163										34.2754	0.32284		38.6104	0.297
47.5694	0.36316		44.2748	0.28534										44.1592	0.28482		34.0442	0.28327
42.6564	0.31332		39.7086	0.30557										36.0094	0.35635		37.3388	0.25159
44.795	0.34647		38.726	0.23561										38.6682	0.2753		44.3904	0.23312
33.6974	0.31619		37.3388	0.25162										38.0902	0.29276		33.7552	0.26222
39.5352	0.34708		46.4134	0.2418										40.2288	0.36037		32.5414	0.31127
39.9398	0.3445		49.997	0.26631										36.9342	0.27271		36.9342	0.21263
37.3966	0.30595		37.4544	0.28273										32.8304	0.27665		28.033	0.18953
41.2692	0.357		35.6048	0.23966										36.3562	0.34222		52.309	0.34455
42.6564	0.37101		38.0902	0.23229										37.3388	0.31005		39.1306	0.18053
48.552	0.38482		49.3034	0.29769										36.703	0.24846		38.0902	0.16177
42.772	0.36408		38.4948	0.24007										39.4774	0.32165		34.1598	0.22258
39.2462	0.34185		35.547	0.27825										46.24	0.29528		38.148	0.25006
43.8702	0.39283		41.7316	0.27922										37.0498	0.31525		37.0498	0.27861
37.3388	0.33617		36.6452	0.23608										37.8012	0.29429		31.501	0.17722
39.7086	0.33907		43.061	0.26766										35.6048	0.35281		35.7782	0.15231
41.7894	0.35647		43.2344	0.24472										41.038	0.32111		34.68	0.13815
42.9454	0.34738		39.2462	0.26401										32.2524	0.24233		31.2698	0.27537
38.7838	0.34655		32.8882	0.23555										32.4258	0.18741		32.5992	0.34065
40.749	0.41425		41.2114	0.26951										36.9342	0.33706		39.882	0.39017
43.35	0.36423		35.0268	0.31894										33.3506	0.22398		39.015	0.21936
40.9802	0.32492		33.4662	0.28352										36.8186	0.24651		32.5414	0.21297
35.8938	0.31684		44.7372	0.25878										32.7148	0.16638		31.6744	0.30444
41.7316	0.32306		40.0554	0.26844										34.102	0.19386		31.0386	0.22906
44.217	0.34628		38.0324	0.23465										34.391	0.30436		36.2406	0.27393
36.992	0.38027		32.8882	0.25161										34.8534	0.27509		32.079	0.19496
42.4252	0.33425		37.1654	0.27656										32.079	0.23082		41.3848	0.28886
48.8988	0.35765		36.2406	0.26839										36.7608	0.30321		43.1188	0.30019
39.0728	0.42085		43.2922	0.26553										35.2002	0.24879		31.7322	0.24518
39.9976	0.3776		43.8702	0.28011										48.0896	0.16642		32.5992	0.26858
48.0318	0.42673		37.6856	0.27783										38.148	0.29861		39.593	0.30491
47.0492	0.35183		44.217	0.27199										35.4892	0.30118		33.813	0.27361
46.7602	0.38035		46.7602	0.27697										33.9864	0.29334		38.8994	0.27445
43.7546	0.3644		40.5178	0.25855										31.6744	0.25601		37.3388	0.27466
41.9628	0.37176		43.5234	0.2855										30.5184	0.26902		36.2406	0.35765
40.0554	0.40515		42.0784	0.27137										37.859	0.31613		39.1884	0.31392
41.7894	0.32323		48.7254	0.29453										44.6794	0.31672		35.6626	0.27046
43.4656	0.32418		37.3388	0.25569										36.6452	0.31916		29.8248	0.15329
39.4196	0.35468		39.304	0.29076										40.9224	0.28842		40.6912	0.34973
38.8994	0.33863		35.1424	0.26166										41.5004	0.32284		38.3214	0.19873
36.4718	0.29783		35.3736	0.25817										36.7608	0.28518		28.4954	0.15072
43.061	0.31891		37.6278	0.24566										44.3326	0.30184		32.8882	0.24262
40.9802	0.33089		29.4202	0.24286										33.6974	0.25542		34.7956	0.2118
42.3096	0.37002		36.125	0.27032										35.6626	0.32354		44.4482	0.25748
41.5004	0.32238		39.4774	0.24967										40.749	0.2983		30.4606	0.25259
37.281	0.35937		36.8764	0.25565										52.3668	0.24942		30.1138	0.14448
41.2114	0.39024		37.57	0.27057										34.4488	0.27282		38.726	0.29031
39.593	0.37155		48.841	0.28121										30.4606	0.29662		39.4196	0.28928
40.6334	0.36773		38.7838	0.27439										38.8994	0.25304		38.6682	0.26104
40.171	0.36466		40.2866	0.27359										37.57	0.30018		34.391	0.25143
47.8006	0.36351		39.0728	0.26511										33.813	0.24848		37.1076	0.28206
30.6918	0.30742		41.0958	0.24502										35.6626	0.23877		38.726	0.29907
43.2344	0.37816		42.8298	0.27906										37.4544	0.24736		37.3966	0.23642
38.8994	0.40841		28.1486	0.34766										31.501	0.20052		36.414	0.15611
38.2058	0.3256		33.7552	0.21315										37.6278	0.3211		41.616	0.20111
44.4482	0.34989		30.1716	0.23577										42.8876	0.33567		33.1194	0.28024
43.1766	0.34799		39.4196	0.27785										42.7142	0.30137		24.7962	0.10834
36.125	0.34938		43.1766	0.2676										46.4712	0.33315		37.57	0.2766
36.8186	0.3064		41.3848	0.25652										37.859	0.27584		33.8708	0.26094
39.2462	0.31328		36.414	0.27171										28.2642	0.24107		31.2698	0.33175
41.7316	0.33904		42.5408	0.25847										35.7782	0.29688		40.8068	0.29165
36.0672	0.26878		38.148	0.29252										31.8478	0.25861		37.57	0.28658
41.616	0.34969		35.3158	0.26566										42.0784	0.33442		36.2406	0.2503
38.3792	0.3158		37.3966	0.26545										38.6104	0.27846		33.4662	0.14981
39.4196	0.30329		29.189	0.24131										33.235	0.28013		30.2294	0.17283
42.483	0.36516		42.8298	0.30394										38.6682	0.27217		27.6284	0.12914
44.217	0.35416		33.1194	0.25555										35.4314	0.36307		35.3158	0.32365
32.8304	0.36518		34.4488	0.28246										33.3506	0.25948		34.969	0.25976
41.7316	0.35343		35.836	0.267										36.5874	0.32151		31.79	0.20359
41.327	0.33057		35.4314	0.22484										36.0094	0.2808		31.0964	0.23837
39.304	0.39548		36.4718	0.24744										34.4488	0.34046		32.7726	0.22921
38.4948	0.396		33.8708	0.23592										35.3736	0.31696		29.3046	0.26973
36.6452	0.34431		40.1132	0.20763										32.946	0.30721		31.3276	0.10132
40.4022	0.35972		34.8534	0.25046										43.7546	0.2941		31.1542	0.26043
34.7956	0.36073		38.7838	0.27226										38.0902	0.32086		33.6974	0.30071
36.5296	0.3636		39.1306	0.27829										36.4718	0.23136		28.2642	0.19424
42.3096	0.3313		34.9112	0.2514										34.5644	0.15149		37.5122	0.29515
36.8186	0.37099		38.3214	0.27103										34.8534	0.32006		41.5004	0.23224
45.373	0.34912		32.7148	0.19495										39.882	0.31499		34.2176	0.25406
44.0436	0.34602		36.703	0.24226										28.8422	0.31473		36.4718	0.18372
42.8298	0.3315		41.327	0.25458										33.4662	0.3108		30.5184	0.261
38.0902	0.34209		42.5408	0.29692										38.726	0.31737		38.6682	0.33843
37.9168	0.31574		42.6564	0.26125										38.0324	0.29611		36.8186	0.35056
36.414	0.31895		34.5644	0.28715										37.1076	0.30742		37.9168	0.19872
43.5812	0.34854		30.9808	0.24467										35.3158	0.25399		33.813	0.18961
42.0784	0.34711		46.3556	0.23951										36.2406	0.31014		38.7838	0.16895
37.4544	0.38991		41.4426	0.2386										33.235	0.28634		32.2524	0.19089
38.0902	0.32205		39.9398	0.25419										38.9572	0.31402		36.1828	0.33884
42.0206	0.32474		38.9572	0.31852										41.2692	0.31985		30.5762	0.20339
38.8416	0.33622		34.8534	0.25668										37.2232	0.31317		38.6682	0.24872
41.616	0.36581		44.5638	0.29901										54.6788	0.22461		41.038	0.28685
45.8932	0.36932		36.8764	0.17018										37.7434	0.29561		37.7434	0.20173
38.0324	0.35158		38.8994	0.23919										35.3158	0.25066		41.9628	0.32833
40.2866	0.31969		37.9746	0.27987										37.8012	0.29439		37.1654	0.31668
43.9858	0.37749		33.4662	0.24975										41.1536	0.20276		36.125	0.27229
37.5122	0.30302		36.8186	0.28202										33.0616	0.27797		31.3854	0.18914
43.0032	0.33592		38.9572	0.28169										32.368	0.26455		42.1362	0.3424
35.4892	0.33465		42.1362	0.29052										34.68	0.16868		31.8478	0.23719
39.7086	0.40626		43.35	0.25172										32.1946	0.19611		35.2002	0.33029
38.8994	0.32444		40.4022	0.29761										33.8708	0.31283		30.2294	0.08519
39.4774	0.35675		47.974	0.27712										37.859	0.29707		32.4836	0.10285
42.8298	0.35044		33.4662	0.24959										33.4662	0.30584		33.3506	0.06342
38.2058	0.34794		36.992	0.23533										33.235	0.3508		34.3332	0.26877
38.2636	0.33517		44.1592	0.25614										48.3208	0.31092		35.4892	0.2039
38.7838	0.34466		34.7956	0.24659										45.7776	0.31218		33.0616	0.26408
41.616	0.35204		42.772	0.2575										33.9286	0.3021		37.2232	0.31634
36.0672	0.37885		36.6452	0.24436										35.2002	0.32538		38.2058	0.32508
41.9628	0.30587		37.1654	0.29068										33.1194	0.25274		36.0672	0.30833
38.8994	0.32006		39.9976	0.27036										33.1194	0.25274		30.4606	0.2703
43.2344	0.34562		41.038	0.29149										35.4892	0.31465		34.969	0.24135
41.8472	0.35791		29.8826	0.24783										35.547	0.23695		51.731	0.25649
36.125	0.38814		31.9056	0.27965										38.7838	0.30388		36.1828	0.27254
43.1188	0.38422		34.1598	0.25035										39.015	0.26993		40.171	0.28056
48.0896	0.35171		37.9168	0.257										41.5004	0.29565		35.1424	0.14998
35.9516	0.32502		35.7204	0.26137										38.5526	0.3108		37.8012	0.22317
35.836	0.36922		37.0498	0.27827										35.0846	0.2694		40.1132	0.27571
42.6564	0.34444		43.8702	0.28499										36.2984	0.28142		29.478	0.28067
41.616	0.3775		39.8242	0.25026										38.6682	0.31354		38.2636	0.26187
37.5122	0.3292		24.9118	0.33549										29.0156	0.17161		42.5986	0.31098
40.0554	0.3196		33.8708	0.22673										36.2406	0.27824		37.5122	0.36938
44.2748	0.36631		41.5004	0.21261										37.5122	0.26443		31.9634	0.17752
42.1362	0.36821		39.3618	0.2687										35.7204	0.35606		33.6396	0.29272
45.1418	0.36153		44.0436	0.26239										37.9746	0.30896		36.0094	0.24378
39.7664	0.35293		35.3736	0.25539										32.1368	0.3343		31.212	0.28048
40.46	0.34625		36.125	0.25945										50.575	0.30386		36.6452	0.27318
36.8764	0.38591		40.9224	0.25327										32.657	0.19432		38.4948	0.23696
48.0318	0.3763		36.125	0.27243										42.8298	0.30352		35.7204	0.2169
41.616	0.3528		43.639	0.27504										39.7664	0.31284		31.4432	0.16961
41.1536	0.34846		36.8764	0.22942										32.1946	0.15384		27.166	0.05293
38.8994	0.34724		41.1536	0.30079										33.9286	0.25627		40.6912	0.33197
40.2866	0.299		29.0156	0.34269										39.7664	0.28341		29.0734	0.18296
40.2866	0.3528		34.9112	0.29903										40.46	0.30031		36.6452	0.26345
43.1766	0.32894		35.4314	0.25009										39.4774	0.29975		40.0554	0.30279
35.7204	0.32882		41.9628	0.21491										32.4836	0.23115		30.923	0.22686
42.3674	0.35928		38.8994	0.28437										34.1598	0.31133		29.5358	0.14115
40.2288	0.37251		35.836	0.26415										34.2754	0.30227		34.969	0.16723
40.6334	0.38217		39.2462	0.24437										36.414	0.18494		39.1306	0.28252
36.414	0.35912		34.5066	0.25316										35.0268	0.28781		47.5694	0.29248
37.5122	0.33334		40.4022	0.25321										35.6626	0.2352		33.6396	0.23261
40.2866	0.37441		38.8994	0.26213										24.2182	0.04089		36.7608	0.18301
35.0268	0.27148		39.1306	0.25112										36.9342	0.31492		34.6222	0.30365
36.2984	0.36325		36.4718	0.26033										38.9572	0.30886		35.1424	0.17213
34.5644	0.30872		39.4196	0.24712										37.5122	0.29492		42.0206	0.28689
36.8186	0.32582		35.8938	0.26956										37.2232	0.28047		28.2642	0.22207
39.9398	0.41812		36.414	0.25904										42.483	0.30334		41.2114	0.29067
40.2288	0.35621		26.3568	0.15374										36.4718	0.32794		33.813	0.19004
36.5296	0.30571		40.5756	0.27775										36.8186	0.2165		33.1772	0.28862
44.1592	0.36908		39.7664	0.28982										34.5644	0.27605		35.3158	0.22574
37.3966	0.32226		45.1418	0.10371										39.9398	0.29805		35.3158	0.30325
41.1536	0.34157		37.9746	0.25139										43.1188	0.29774		32.5992	0.14981
39.4774	0.32934		37.6856	0.22197										34.969	0.30901		31.0964	0.21805
39.7086	0.36546		36.7608	0.24228										38.0902	0.30149		31.501	0.20661
40.171	0.35755		32.368	0.29463										33.3506	0.23693		32.0212	0.28301
37.1076	0.41626		32.5414	0.23477										32.1368	0.16983		33.7552	0.26526
41.616	0.38018		42.4252	0.24144										36.5296	0.24535		37.4544	0.20293
40.5178	0.36415		42.5408	0.22571										38.148	0.31248		36.4718	0.23838
43.8124	0.33556		36.7608	0.25269										32.5414	0.24677		36.125	0.25678
41.2114	0.40042		33.235	0.24011										43.4078	0.26659		38.6682	0.22772
38.0324	0.39037		38.3792	0.28742										29.0734	0.31131		34.102	0.25331
43.4078	0.36509		35.3158	0.26394										29.8248	0.10464		37.0498	0.30379
41.1536	0.35929		27.9174	0.14831										42.4252	0.30704		33.5818	0.28189
42.3096	0.35128		39.6508	0.28098										36.9342	0.21682		33.3506	0.254
42.5986	0.33321		38.7838	0.24359										38.2636	0.30352		41.7316	0.2947
40.5178	0.34818		36.125	0.2521										26.9348	0.0544		30.4028	0.13207
37.3966	0.32298		31.8478	0.247										39.2462	0.34992		40.9802	0.26345
38.726	0.38059		42.483	0.26727										41.4426	0.35111		38.4948	0.28744
38.8416	0.39064		39.0728	0.22362										41.4426	0.31933		44.3904	0.27897
43.1766	0.33007		41.616	0.29413										38.8416	0.30302		37.5122	0.19538
46.7602	0.35384		35.6048	0.27464										38.148	0.29952		37.1654	0.25248
40.5756	0.35605		32.4258	0.29879										32.079	0.22298		33.0616	0.33314
42.8876	0.37345		31.6744	0.25596										40.3444	0.29844		36.414	0.3049
40.9224	0.37039		34.2754	0.24774										40.8068	0.30799		29.767	0.209
39.8242	0.34422		39.8242	0.25021										33.8708	0.26557		36.7608	0.30137
46.818	0.35142		39.6508	0.25137										27.6862	0.09049		39.1884	0.28294
39.9398	0.34552		36.0672	0.1904										40.8646	0.29174		33.4084	0.19629
37.57	0.32969		40.1132	0.26348										33.2928	0.17079		32.079	0.28268
39.015	0.34798		41.0958	0.29041										35.6048	0.26083		30.345	0.17206
39.2462	0.346		37.7434	0.25646										34.7956	0.2772		32.8304	0.2884
37.6278	0.36779		39.7664	0.24961										37.6856	0.25902		38.3214	0.17987
39.7664	0.34942		39.7664	0.1856										40.2288	0.29583		28.7844	0.20302
38.3792	0.31182		41.4426	0.27382										35.7204	0.28288		35.836	0.2399
37.1654	0.30074		36.0094	0.25635										37.4544	0.2969		38.2058	0.29034
41.1536	0.36238		47.9162	0.21036										37.9746	0.28596		40.749	0.30869
44.5638	0.34867		30.5184	0.26668										40.0554	0.30787		36.703	0.30926
39.4196	0.36312		34.7956	0.2471										39.8242	0.31943		38.726	0.29405
38.3792	0.37748		42.0784	0.2603										32.946	0.29359		40.171	0.28827
35.3158	0.33369		41.3848	0.26333										38.0902	0.3198		33.524	0.20053
36.1828	0.35238		47.5116	0.27728										34.3332	0.22877		34.8534	0.18459
35.547	0.36558		37.859	0.24611										40.4022	0.30246		34.2754	0.31338
40.1132	0.36679		37.4544	0.26142										25.8366	0.08324		37.9746	0.3064
33.4662	0.35558		33.9286	0.30253										35.6048	0.32962		40.3444	0.2437
45.2574	0.34754		40.749	0.24958										34.102	0.31148		35.3158	0.22351
41.2114	0.33713		33.813	0.2894										26.877	0.20856		34.5644	0.29454
36.6452	0.32956		38.2058	0.28835										35.8938	0.20933		41.8472	0.19027
41.6738	0.3555		29.7092	0.27062										36.2406	0.3481		32.1368	0.20393
37.859	0.36171		45.7198	0.27125										35.2002	0.28348		34.8534	0.26328
43.639	0.40095		45.373	0.25019										32.7148	0.23101		40.5756	0.278
41.0958	0.35066		39.4196	0.24728										36.9342	0.33017		31.3854	0.24033
43.7546	0.37983		30.8074	0.18209										34.391	0.34057		33.813	0.09959
39.4774	0.37073		37.2232	0.2825										34.68	0.25858		31.8478	0.26971
44.1014	0.38169		33.5818	0.28702										34.68	0.25858		35.8938	0.29895
41.7894	0.36866		36.3562	0.29599										34.7956	0.28653		32.657	0.324
37.1654	0.33071		36.0672	0.27749										30.7496	0.22671		36.0094	0.28312
39.5352	0.35324		33.1194	0.21763										34.969	0.19476		35.4892	0.26117
34.5644	0.28852		45.373	0.26803										35.9516	0.30843		33.1194	0.16817
41.905	0.3613		40.749	0.2689										41.5004	0.29447		31.0386	0.25252
41.616	0.38302		25.2586	0.33296										41.5004	0.29447		32.4836	0.2255
36.8186	0.32006		36.1828	0.31364										39.7086	0.30549		37.9168	0.29215
41.4426	0.34214		36.1828	0.26423										30.2872	0.19144		31.8478	0.24203
43.639	0.37866		41.0958	0.30257										33.8708	0.34764		33.9864	0.26432
45.084	0.351		39.4196	0.24828										34.2176	0.29865		37.9168	0.25662
41.4426	0.43734		37.57	0.27869										30.923	0.24684		37.5122	0.15417
43.4656	0.32435		40.2866	0.27452										29.8826	0.27258		33.6396	0.22148
44.0436	0.33353		37.2232	0.23347										36.7608	0.29972		37.6856	0.22681
42.194	0.37153		45.373	0.25739										44.5638	0.31171		33.7552	0.18134
37.1076	0.34107		38.148	0.22518										43.8124	0.30697		37.9168	0.28222
41.0958	0.34162		37.859	0.29178										37.9746	0.26403		40.0554	0.27862
43.1188	0.35155		41.0958	0.25269										36.8186	0.30408		35.836	0.27545
41.5582	0.32079		39.0728	0.30644										47.8584	0.28908		29.478	0.23299
43.6968	0.37569		43.1188	0.27713										38.8994	0.32631		54.7944	0.20474
37.8012	0.34017		42.772	0.29624										35.7204	0.20546		37.8012	0.3189
38.3214	0.39512		46.1822	0.23444										43.1188	0.28826		36.4718	0.3246
45.1996	0.35429		32.079	0.15485										37.3388	0.29433		32.946	0.23836
36.703	0.33479		37.5122	0.26496										38.5526	0.22992		35.7204	0.23927
45.373	0.35531		37.3966	0.28037										35.0268	0.25556		51.442	0.28802
37.281	0.39094		38.2058	0.27455										37.9168	0.3089		36.1828	0.26394
40.3444	0.34037		30.9808	0.27711										30.345	0.274		32.7726	0.20889
43.7546	0.38837		42.0206	0.27518										38.8994	0.30514		40.5178	0.31212
38.2636	0.35814		38.6104	0.28262										43.2344	0.16816		28.4954	0.14885
34.391	0.29445		38.148	0.28498										37.2232	0.27636		35.4892	0.22336
30.1716	0.31227		39.2462	0.28724										36.2984	0.15285		35.2002	0.24525
37.0498	0.29377		39.4196	0.28643										27.6284	0.13314		28.2064	0.13238
40.2288	0.37272		35.0846	0.27976										38.8994	0.29982		28.7844	0.19537
35.7782	0.31851		33.8708	0.24186										37.9746	0.29625		36.0672	0.23506
34.7378	0.31313		45.0262	0.27004										30.345	0.18645		33.4662	0.20557
41.1536	0.2922		30.9808	0.30547										38.0324	0.28049		34.102	0.27051
38.6682	0.3688		39.9398	0.24969										25.3742	0.20076		36.2406	0.361
41.8472	0.37069		34.0442	0.24878										37.2232	0.33053		34.8534	0.10398
39.1884	0.34404		46.7024	0.26489										36.703	0.32614		33.813	0.14778
42.3674	0.36282		42.8876	0.28014										38.0902	0.30842		33.235	0.12785
42.5986	0.29744		32.4836	0.22873										31.9056	0.30108		30.8074	0.16304
34.68	0.4316		38.6104	0.22293										29.9404	0.30339		36.1828	0.35564
40.1132	0.34413		45.8932	0.28644										34.5644	0.29107		34.6222	0.30673
39.593	0.30684		38.0902	0.29925										32.2524	0.26921		33.1194	0.30211
44.3326	0.34143		31.5588	0.26942										36.0672	0.30561		34.7956	0.16381
39.9976	0.3612		37.9168	0.2792										41.8472	0.29519		42.8876	0.32171
40.171	0.35471		43.8124	0.31494										40.6912	0.32208		41.2114	0.24044
39.015	0.35518		30.056	0.26063										38.5526	0.30184		32.2524	0.1893
42.2518	0.3699		43.2344	0.24738										35.0268	0.34214		41.1536	0.28592
40.2288	0.31869		35.0846	0.25841										36.5874	0.3289		34.6222	0.16809
40.6334	0.32383		31.212	0.26094										38.3214	0.26156		38.148	0.32472
40.5756	0.35645		39.593	0.24749										29.9404	0.25774		32.946	0.19586
41.038	0.32922		39.7086	0.24962										33.0616	0.30913		35.547	0.29696
35.8938	0.35464		38.4948	0.24601										39.1306	0.28509		31.0386	0.13636
36.7608	0.34502		40.9224	0.24954										29.9982	0.22116		33.235	0.18176
39.0728	0.36703		33.2928	0.23642										33.2928	0.07769		35.7782	0.28951
46.2978	0.38605		42.6564	0.20168										34.9112	0.22351		27.8596	0.02055
39.882	0.34935		41.3848	0.27167										38.6104	0.30478		31.6744	0.28921
32.8304	0.28719		40.4022	0.24309										34.4488	0.27394		33.1194	0.19417
43.639	0.33837		44.8528	0.28099										37.2232	0.31411		35.9516	0.29905
42.1362	0.36776		39.1884	0.29351										33.813	0.23109		31.212	0.21751
37.6856	0.29058		40.749	0.22565										38.7838	0.25022		38.3792	0.30019
40.0554	0.32372		32.5992	0.26124										35.9516	0.27249		36.5296	0.24648
38.8416	0.41403		39.8242	0.27726										30.1138	0.22322		32.0212	0.31429
41.616	0.39437		40.6334	0.25532										35.7782	0.29183		34.9112	0.24431
40.5756	0.34567		36.4718	0.25748										37.3966	0.24306		34.1598	0.26398
[truncated: 7,018 more rows]
[truncated: 3 more columns]

## Sheet: Figure2-Supplements
Supplement1 (mean and SD of all population medians, see Figure 2C)						Supplement2C (mean and SD of fraction of infected cells)								Supplement2D (erythrocytes incubated with P.f.)
	cell size	SD cell size	deformation	SD deformation		MORE analyis				blood smear				4h															12h															16h
	[µm^2]	[µm^2]	[]	[]		incubation time	mean	SD		incubation time	mean	SD
normal	40.1462	0.90556	0.34705	0.01045		[h]	[%]	[%]		[h]	[%]	[%]					sample 1						sample 2									sample 1						sample 2									sample 1
spherocytosis	37.7145	1.75602	0.27733	0.02199		4	0.2446	0.02647		12	8.0983	0.3096
						12	0.4094	0.1431		24	8.16447	0.58341		control			exposed			identified infected			exposed			identified infected			control			exposed			identified infected			exposed			identified infected			control			exposed
						16	0.41361	0.51705		42	7.88248	0.85996		cell size	deformation		cell size	deformation		cell size	deformation		cell size	deformation		cell size	deformation		cell size	deformation		cell size	deformation		cell size	deformation		cell size	deformation		cell size	deformation		cell size	deformation		cell size	deformation
						20	0.7	0.08322						[µm^2]	[]		[µm^2]	[]		[µm^2]	[]		[µm^2]	[]		[µm^2]	[]		[µm^2]	[]		[µm^2]	[]		[µm^2]	[]		[µm^2]	[]		[µm^2]	[]		[µm^2]	[]		[µm^2]	[]
p-values for comparing:						24	1.22214	0.38924						32.5992	0.26152		38.6104	0.29049		42.5986	0.29907		39.1884	0.33834		38.8994	0.24909		37.57	0.29108		35.4892	0.18264		55.488	0.22111		40.9224	0.2471		28.1486	0.17641		40.5178	0.32607		37.5122	0.3178
	spherocytosis / normal					36	1.67801	0.03225						33.5818	0.22907		38.6104	0.29049		20.6924	0.06173		39.1884	0.33834		35.3736	0.2411		39.015	0.31463		35.4892	0.18264		34.1598	0.25833		40.9224	0.2471		42.3674	0.2603		40.5178	0.32607		37.5122	0.3178
cell size	0.0038					42	1.16947	0.16742						42.8876	0.3047		38.6104	0.29049		32.8304	0.30841		39.1884	0.33834		32.8304	0.20135		38.2058	0.33147		35.4892	0.18264		27.2238	0.28334		40.9224	0.2471		33.1194	0.17728		40.5178	0.32607		31.212	0.1684
deformation	0.00185					46	0.85149	0.12762						35.3158	0.22147		44.506	0.31345		39.304	0.24018		37.1654	0.298		38.5526	0.21614		33.6974	0.25222		35.4892	0.18264		36.2406	0.29314		40.9224	0.2471		35.9516	0.20536		42.8876	0.33984		38.2636	0.26268
														35.8938	0.24485		37.2232	0.31765		35.258	0.18921		37.1654	0.298		50.864	0.23709		35.836	0.28501		44.506	0.28955		32.1946	0.23277		28.9	0.05308		39.7086	0.29102		42.8876	0.33984		39.4196	0.29646
														34.9112	0.30365		34.7378	0.23811		39.9976	0.2979		33.3506	0.35376		50.7484	0.24102		38.3792	0.27211		38.6104	0.22194		26.6458	0.19292		36.0094	0.27976		35.6626	0.26436		42.8876	0.33984		37.5122	0.29487
														34.391	0.30316		35.4892	0.28473		43.061	0.16015		33.3506	0.35376		36.703	0.06536		32.079	0.29368		35.0846	0.1756		38.8416	0.2385		35.0846	0.26087		47.5694	0.3175		42.8876	0.33984		28.4954	0.18348
														35.8938	0.26826		40.1132	0.29878		33.0616	0.15728		34.7956	0.33095		33.7552	0.15197		37.0498	0.25557		37.6856	0.30941		59.245	0.31237		32.7726	0.28893		31.4432	0.24627		42.8876	0.33984		37.859	0.2336
														34.3332	0.24859		35.258	0.28496		47.5694	0.28172		42.3674	0.30999		38.3792	0.1506		38.0902	0.28459		31.1542	0.20781		31.5588	0.22218		37.5122	0.33829		34.4488	0.12166		42.8876	0.33984		38.6104	0.20322
														32.657	0.20287		36.703	0.3164		35.3158	0.27957		32.657	0.20434		33.3506	0.14521		37.3966	0.25626		38.3792	0.2637		31.3854	0.09326		34.9112	0.2073		35.2002	0.18123		42.8876	0.33984		34.6222	0.17401
														40.5178	0.29201		36.8764	0.29286		26.01	0.11903		36.414	0.31829		36.9342	0.27312		41.2692	0.33387		38.0902	0.32816		34.6222	0.21289		29.0734	0.20268		28.3798	0.25793		42.8876	0.33984		41.5004	0.30172
														40.5756	0.32453		43.35	0.31774		32.5992	0.19696		29.767	0.28011		29.478	0.17076		36.125	0.31757		31.9056	0.25095		44.217	0.29349		30.8074	0.27274		36.992	0.14669		42.8876	0.33984		31.3854	0.24343
														29.6514	0.2186		36.1828	0.30649					40.1132	0.26082					37.7434	0.26848		39.1306	0.32427		38.8994	0.11431		37.1076	0.33523		38.148	0.21977		42.8876	0.33984		32.368	0.23883
														33.6396	0.29353		32.946	0.24649					36.125	0.25853					52.9448	0.3259		37.3966	0.24252		31.2698	0.28928		36.8186	0.23092		30.1716	0.2016		42.8876	0.33984		38.5526	0.15247
														31.9634	0.25385		39.9398	0.33313					43.8702	0.30218					34.7378	0.32069		40.2288	0.31464					36.0672	0.33049		58.5514	0.35742		42.8876	0.33984		37.1076	0.1806
														35.0846	0.26544		31.2698	0.10469					44.0436	0.41117					29.8826	0.14281		31.9634	0.14136					31.79	0.12843		32.4258	0.20848		42.8876	0.33984		29.9404	0.21256
														33.0038	0.21003		42.0784	0.30292					42.7142	0.24648					26.9926	0.11956		38.148	0.29898					37.9168	0.33126		36.0672	0.24604		42.8876	0.33984		40.8646	0.30903
														33.8708	0.21127		41.616	0.29304					33.6974	0.28355					28.3798	0.08648		34.6222	0.25726					41.905	0.29381		36.7608	0.22959		42.8876	0.33984		33.3506	0.18282
														41.616	0.31043		40.3444	0.25587					40.8646	0.3075					38.8416	0.29465		33.813	0.1638					36.414	0.29382		36.414	0.23036		42.8876	0.33984		35.4314	0.20742
														41.8472	0.31338		30.1138	0.26575					38.6682	0.33855					38.2636	0.28066		33.9864	0.23284					44.6216	0.32492		37.0498	0.28647		42.8876	0.33984		37.5122	0.28764
														36.7608	0.34177		43.9858	0.32862					45.7198	0.30484					31.501	0.20352		34.1598	0.2918					31.79	0.29691		31.1542	0.29079		42.8876	0.33984		31.79	0.18714
														36.703	0.28955		34.8534	0.26466					36.0094	0.30527					35.7204	0.32338		31.6166	0.21109					33.9286	0.26097		33.4662	0.17863		42.8876	0.33984		37.8012	0.2332
														41.6738	0.32563		37.1076	0.25423					42.194	0.28599					37.1076	0.33199		32.1368	0.28384					39.5352	0.29561					42.8876	0.33984		29.0156	0.16635
														33.0616	0.17869		36.0672	0.21532					40.2288	0.31285					39.7664	0.30745		35.6626	0.2074					32.7148	0.3207					42.8876	0.33984		36.1828	0.28939
														28.611	0.27275		37.1654	0.23434					36.8186	0.14974					35.9516	0.25507		33.9864	0.17695					22.3686	0.13328					42.8876	0.33984		36.7608	0.28973
														33.7552	0.24876		36.2984	0.21504					36.9342	0.32785					42.483	0.26565		34.5066	0.30339					30.4606	0.15871					42.8876	0.33984		33.2928	0.32442
														33.813	0.24354		32.8882	0.29639					35.6048	0.10587					35.258	0.22381		36.703	0.31519					33.8708	0.20445					42.8876	0.33984		32.8304	0.27525
														42.483	0.31244		39.593	0.29013					36.1828	0.29009					40.6912	0.29323		33.6396	0.30542					35.3736	0.20839					42.8876	0.33984		36.992	0.21729
														39.1306	0.333		36.2406	0.24716					35.836	0.32565					32.3102	0.17456		37.8012	0.23471					39.9398	0.29862					42.8876	0.33984		30.8652	0.21318
														47.5116	0.32567		34.7956	0.28405					37.8012	0.32013					39.3618	0.33945		36.703	0.20881					33.4084	0.01186					42.8876	0.33984		32.0212	0.23598
														35.9516	0.23599		33.6396	0.22692					35.547	0.22839					36.992	0.33564		34.4488	0.26732					39.0728	0.29132					42.8876	0.33984		38.437	0.31433
														37.281	0.28886		38.437	0.25662					44.1014	0.30414					40.8068	0.32753		34.4488	0.26732					44.6794	0.33001					42.8876	0.33984		35.0268	0.15685
														35.547	0.27465		34.102	0.26661					35.547	0.30408					36.7608	0.31116		26.1834	0.23255					35.3736	0.24652					42.8876	0.33984		35.6626	0.27932
														39.593	0.27967		33.235	0.25596					33.3506	0.28337					40.8646	0.33447		33.9864	0.16713					36.6452	0.31622					42.8876	0.33984		36.3562	0.29205
														49.1878	0.29784		32.368	0.24184					35.7782	0.30638					38.148	0.20501		32.657	0.30301					42.5408	0.27201					42.8876	0.33984		38.0902	0.24726
														37.0498	0.27071		33.9864	0.1994					36.0094	0.17929					37.1076	0.32128		33.9864	0.23838					32.3102	0.28949					42.8876	0.33984		38.148	0.30835
														38.8994	0.28367		27.2816	0.05333					35.3158	0.27301					38.148	0.27701		32.5414	0.21663					35.0268	0.2476					42.8876	0.33984		33.2928	0.19944
														37.9168	0.30664		41.2692	0.19423					30.4028	0.21572					34.7956	0.2288		36.4718	0.2006					32.7726	0.26674					42.8876	0.33984		37.0498	0.27626
														35.0846	0.29635		38.4948	0.27779					40.6334	0.30627					40.9224	0.26663		37.6856	0.21663					41.5004	0.31932					42.8876	0.33984		34.2754	0.26605
														37.6278	0.33275		38.4948	0.12017					36.5296	0.31437					33.8708	0.31502		35.6048	0.24811					38.3792	0.31466					42.8876	0.33984		40.6334	0.3242
														37.6278	0.29787		34.7378	0.21311					31.3276	0.3042					34.3332	0.28923		38.3792	0.20961					43.9858	0.27958					43.9858	0.30281		32.2524	0.25195
														43.2344	0.34475		33.9286	0.20528					40.171	0.29812					38.4948	0.26893		34.3332	0.18794					33.9286	0.22765					33.5818	0.26188		43.1766	0.32479
														35.1424	0.35014		44.6794	0.26212					40.46	0.32021					34.7956	0.33163		37.859	0.28415					37.1654	0.28013					28.7844	0.20219		32.368	0.22153
														34.6222	0.21895		38.3792	0.26268					44.2748	0.35352					32.8882	0.13104		35.6626	0.30816					37.9168	0.33961					40.8646	0.29626		41.9628	0.27171
														39.882	0.29841		33.5818	0.17127					36.8186	0.3266					38.3214	0.29712		40.6334	0.24485					33.4084	0.32594					36.703	0.23089		40.8646	0.25944
														37.8012	0.27943		32.1368	0.10135					42.3674	0.30311					33.7552	0.24108		37.6856	0.27063					39.5352	0.24125					36.414	0.30439		36.992	0.29596
														42.6564	0.33543		37.6856	0.22497					38.3792	0.31515					34.5644	0.3147		35.9516	0.24391					41.5004	0.30958					39.7664	0.32144		47.396	0.2023
														37.6278	0.29364		25.9522	0.21845					35.0268	0.25753					38.8416	0.25177		38.148	0.10495					41.5004	0.31779					44.4482	0.34339		31.3276	0.15673
														44.3326	0.28336		43.4078	0.29399					41.2692	0.23208					40.6912	0.3035		33.5818	0.20613					39.3618	0.18213					37.3966	0.2963		38.5526	0.34829
														33.1194	0.27678		34.6222	0.33117					33.0616	0.25616					37.3966	0.32158		30.4028	0.067					32.7148	0.25988					37.3966	0.2963		44.0436	0.34864
														35.547	0.1759		31.8478	0.28214					42.0784	0.3367					32.1946	0.25329		39.4196	0.3324					38.8994	0.28246					36.9342	0.24568		34.7378	0.18626
														42.0784	0.29945		37.0498	0.33434					34.7956	0.29212					39.593	0.28558		38.7838	0.20966					39.9398	0.27283					41.6738	0.27862		28.033	0.14312
														36.5296	0.31391		39.1306	0.27649					36.414	0.33985					41.7316	0.31665		33.4662	0.22704					37.859	0.29019					41.038	0.31512		39.7086	0.31044
														36.2406	0.24836		38.726	0.39584					37.7434	0.32085					36.6452	0.26419		32.657	0.24692					32.2524	0.09422					34.2176	0.29927		36.414	0.19014
														34.68	0.30713		36.5874	0.17295					38.148	0.34615					41.6738	0.29675		35.258	0.1672					30.7496	0.16999					32.5992	0.28478		34.5644	0.22057
														40.2866	0.35569		35.547	0.29287					41.905	0.27207					41.6738	0.29675		35.4314	0.23952					28.0908	0.18394					45.1418	0.3514		41.3848	0.31344
														39.9976	0.29497		33.4662	0.30195					37.2232	0.31582					40.4022	0.28865		40.46	0.28491					36.414	0.18685					38.148	0.29289		32.7148	0.29167
														34.102	0.3212		38.6104	0.22022					34.6222	0.26403					40.9802	0.35924		33.5818	0.19934					33.0616	0.22094					39.2462	0.30795		36.2984	0.16335
														40.46	0.22817		41.327	0.30842					38.5526	0.15888					39.6508	0.27587		39.0728	0.28596					40.6912	0.24758					44.1592	0.33699		54.3898	0.26023
														33.6396	0.1719		35.6626	0.30214					42.5986	0.29723					33.0616	0.29377		39.1306	0.30287					34.2176	0.15008					37.1654	0.33382		31.4432	0.23359
														33.0616	0.23172		32.5414	0.20243					43.4656	0.31102					27.3394	0.23777		31.4432	0.23621					37.3966	0.1811					37.859	0.33478		36.414	0.2203
														35.547	0.2561		35.6626	0.31612					38.4948	0.29433					33.9286	0.23378		37.281	0.26478					34.9112	0.27961					43.5234	0.22545		36.1828	0.28648
														31.2698	0.25546		39.3618	0.30745					33.5818	0.30951					36.7608	0.30662		33.3506	0.30354					51.731	0.2009					38.7838	0.28574		36.992	0.30025
														36.2984	0.30321		34.2754	0.35795					38.0324	0.2959					33.0616	0.32629		34.4488	0.25114					34.6222	0.27621					41.4426	0.32831		39.5352	0.20419
														40.4022	0.34049		35.258	0.20321					34.1598	0.31618					43.8702	0.31095		31.0964	0.22159					43.9858	0.31801					33.0616	0.3047		28.9578	0.28899
														38.2058	0.33122		33.524	0.2849					32.1368	0.23449					36.6452	0.29049		34.5066	0.0953					34.0442	0.3008					39.5352	0.30123		37.2232	0.27086
														30.4606	0.26505		35.7204	0.29142					39.7664	0.24946					38.726	0.32946		42.8876	0.35433					32.368	0.25919					35.0846	0.34394		30.5762	0.25651
														38.6104	0.32108		39.6508	0.28093					37.0498	0.19052					40.2288	0.31153		36.414	0.32322					41.2114	0.31079					47.6272	0.33414		35.0846	0.34626
														31.0964	0.16252		34.6222	0.30674					35.6048	0.23086					29.3046	0.20076		40.6334	0.26102					36.9342	0.16742					40.749	0.30216		33.4662	0.2517
														31.9056	0.30168		31.4432	0.21095					41.038	0.29902					45.1996	0.30684		34.7378	0.18124					35.3158	0.26917					35.547	0.3107		33.2928	0.35708
														36.4718	0.30332		36.2984	0.33083					40.0554	0.33012					32.946	0.19152		34.1598	0.18934					38.5526	0.22103					35.7782	0.3148		38.3792	0.29116
														34.2754	0.29763		31.8478	0.25395					37.6278	0.2321					37.9168	0.32552		31.2698	0.28201					36.2406	0.20596					41.038	0.32904		39.1306	0.34317
														35.6626	0.27179		43.2922	0.29699					30.9808	0.20449					27.2816	0.18566		28.1486	0.16365					42.1362	0.21122					37.5122	0.33974		43.1188	0.09532
														37.9168	0.24336		37.4544	0.11461					40.5178	0.34046					37.4544	0.37745		33.9864	0.24378					31.9634	0.19456					42.194	0.28325		33.7552	0.28329
														35.836	0.27009		38.148	0.31947					35.4314	0.26316					37.6856	0.3331		38.726	0.26019					36.9342	0.28822					35.1424	0.27924		36.414	0.32047
														34.969	0.32564		31.6166	0.28857					35.836	0.23539					32.2524	0.25643		34.7378	0.30555					32.7726	0.27603					35.836	0.28665		37.1654	0.25645
														34.969	0.27558		35.4314	0.31092					37.3388	0.28903					33.9286	0.21904		42.3096	0.3259					36.6452	0.28744					37.7434	0.30379		36.6452	0.2987
														34.102	0.3072		31.6744	0.10782					38.0902	0.27199					36.3562	0.30745		27.3972	0.18245					41.038	0.31849					43.2344	0.3407		34.6222	0.19958
														37.281	0.30367		35.3736	0.25011					42.0206	0.32588					33.1772	0.30619		35.0846	0.3122					25.0274	0.21769					34.391	0.3067		34.5066	0.31794
														33.7552	0.28075		33.0616	0.10167					37.2232	0.31009					31.212	0.23615		29.2468	0.17071					34.7378	0.28984					40.1132	0.26184		32.2524	0.30785
														34.6222	0.24109		31.9634	0.17544					35.258	0.31071					40.9224	0.30918		43.639	0.32724					33.2928	0.27324					40.8646	0.31314		35.8938	0.24312
														29.8248	0.2559		38.8994	0.07641					33.9864	0.26039					36.5874	0.31403		35.6048	0.22544					34.7378	0.24517					31.501	0.2771		33.5818	0.24288
														35.9516	0.27648		35.7204	0.17319					39.7086	0.33234					41.4426	0.31921		32.079	0.27321					38.7838	0.32328					36.414	0.25708		29.7092	0.16445
														36.0094	0.26839		36.8764	0.24337					40.171	0.3424					40.0554	0.27604		37.4544	0.32769					36.703	0.23694					40.6334	0.3296		28.322	0.18995
														38.2636	0.29869		40.3444	0.28764					43.639	0.31002					42.483	0.30012		31.2698	0.17302					38.2636	0.26916					35.8938	0.2466		40.46	0.21153
														33.0616	0.33656		34.1598	0.22392					40.2866	0.3151					39.1306	0.13307		32.1368	0.09376					35.1424	0.30179					29.8826	0.1807		29.478	0.15174
														34.0442	0.20368		36.0094	0.29774					38.0902	0.30338					39.4774	0.24371		33.9286	0.19777					39.1306	0.2997					39.304	0.33673		43.35	0.26741
														33.8708	0.30559		35.0846	0.22286					41.038	0.32617					37.1076	0.3027		38.2636	0.29373					30.1716	0.21801					35.3158	0.24893		34.7378	0.27442
														40.5178	0.27635		46.0666	0.29191					40.46	0.32986					36.8186	0.33338		31.7322	0.2493					35.2002	0.23156					44.0436	0.35408		33.6396	0.20703
														28.1486	0.19606		40.46	0.29322					38.9572	0.28879					34.102	0.20184		40.8068	0.29097					35.2002	0.23156					37.2232	0.32316		32.8882	0.25815
														38.8416	0.33729		32.3102	0.08409					39.8242	0.30807					32.4258	0.21648		34.391	0.12419					35.0846	0.30874					38.2058	0.30191		34.7378	0.25959
														31.3854	0.23416		31.6166	0.21369					26.877	0.11302					33.0616	0.29115		36.414	0.28584					33.5818	0.24976					38.6682	0.37053		38.3792	0.35113
														42.6564	0.31275		20.7502	0.02934					37.5122	0.31157					38.2636	0.27976		31.4432	0.23823					32.2524	0.28627					44.9106	0.31298		37.5122	0.22791
														41.038	0.3125		41.616	0.2166					36.2406	0.26686					35.0846	0.28167		38.3214	0.29233					36.992	0.21166					45.373	0.33461		33.6396	0.18708
														37.0498	0.28854		38.5526	0.22835					42.772	0.37489					37.5122	0.29878		38.5526	0.29651					38.2636	0.25745					38.0902	0.29165		34.0442	0.23296
														37.4544	0.27104		29.7092	0.23392					42.8298	0.28835					34.7378	0.27922		37.4544	0.24983					36.5874	0.30492					32.657	0.14218		36.8186	0.26259
														37.6278	0.33574		36.703	0.30333					38.2058	0.33111					32.7148	0.06973		37.4544	0.32493					38.6104	0.30227					49.0722	0.34089		28.9	0.06684
														34.8534	0.1657		39.0728	0.32108					36.7608	0.30687					31.0386	0.25394		32.5992	0.29906					35.547	0.28878					35.3158	0.27285		33.7552	0.25497
														36.8764	0.28072		35.258	0.26767					39.5352	0.3064					34.8534	0.31668		37.2232	0.22398					32.5414	0.25484					34.4488	0.24043		36.414	0.24747
														35.7782	0.27589		27.8596	0.22526					38.3214	0.32911					40.46	0.32518		38.7838	0.22908					34.102	0.17182					34.7956	0.35099		37.6856	0.32256
														38.6104	0.20081		37.6856	0.28025					38.5526	0.3268					38.3792	0.30344		37.6856	0.3155					40.9224	0.30884					34.2176	0.31287		41.327	0.23021
														44.5638	0.31152		35.6626	0.32623					35.0846	0.27174					42.8298	0.35878		34.5644	0.18951					35.4314	0.28588					40.1132	0.19424		32.1368	0.24395
														35.7782	0.32374		37.57	0.31217					38.3214	0.29046					33.0038	0.16146		36.8764	0.26877					37.8012	0.32996					38.6682	0.33637		36.9342	0.31358
														40.171	0.27552		29.5358	0.21354					35.3736	0.29173					29.0156	0.23598		36.125	0.21258					36.3562	0.24678					38.3214	0.16734		34.5066	0.13809
														30.7496	0.28337		38.7838	0.33066					32.0212	0.26843					32.368	0.28568		37.2232	0.29784					39.7086	0.27872					42.5408	0.32632		37.5122	0.29259
														36.9342	0.21737		42.8298	0.2316					37.3388	0.30497					39.1306	0.30233		28.8422	0.18488					40.9802	0.30707					40.4022	0.34114		34.2176	0.32498
														37.9746	0.27035		33.235	0.27155					33.813	0.17222					34.391	0.25533		32.5414	0.1458					39.1884	0.27468					38.6682	0.32031		39.3618	0.04044
														34.1598	0.32693		37.9168	0.28821					35.836	0.32643					40.8646	0.26017		38.6104	0.31057					34.7378	0.28928					34.3332	0.22184		34.5066	0.28899
														35.258	0.24855		34.5644	0.10423					34.7378	0.36601					36.1828	0.27348		33.9864	0.30901					28.4376	0.16975					35.836	0.31326		25.0274	0.07072
														30.345	0.27452		43.8702	0.29231					39.0728	0.28717					36.2406	0.25015		41.7316	0.349					37.1076	0.32815					38.6682	0.30969		32.8882	0.27208
														34.102	0.29495		33.9864	0.18733					44.1014	0.30639					33.8708	0.35756		34.6222	0.22164					32.0212	0.16661					34.6222	0.2191		28.3798	0.12926
														28.9578	0.32306		40.1132	0.24597					33.524	0.23536					35.0268	0.28028		43.1188	0.30432					35.7204	0.13049					39.8242	0.29418		39.2462	0.26296
														29.7092	0.19729		32.8304	0.2906					34.2754	0.21654					36.4718	0.30114		32.2524	0.25838					39.882	0.27344					37.57	0.33213		29.0156	0.25327
														38.726	0.27539		36.0094	0.21069					37.3388	0.21615					33.6974	0.25161		30.2872	0.28846					36.0094	0.24012					35.258	0.29607		39.593	0.24344
														33.9286	0.29705		36.8764	0.32013					33.7552	0.19382					35.9516	0.29914		34.7956	0.29493					34.7378	0.27422					35.258	0.29607		38.0324	0.34544
														33.7552	0.25241		34.2754	0.2426					31.5588	0.0887					35.3158	0.28366		34.1598	0.25833					29.0734	0.13137					42.0784	0.27649		31.0386	0.18529
														34.4488	0.234		36.0672	0.30547					37.1076	0.30276					36.4718	0.32168		28.7844	0.24205					27.3972	0.14					37.7434	0.26477		46.818	0.25118
														47.8584	0.29099		38.2058	0.32123					32.1368	0.2234					50.9796	0.2019		35.7204	0.22489					39.0728	0.3106					36.6452	0.30202		34.5644	0.20607
														29.2468	0.18547		33.1194	0.23227					38.7838	0.10915					42.7142	0.31313		39.593	0.24531					36.0094	0.11525					44.3904	0.30484		37.6278	0.29026
														40.1132	0.2787		30.5184	0.2631					36.3562	0.23989					33.6396	0.23978		33.6396	0.30511					31.8478	0.24727					37.8012	0.23768		33.0038	0.20133
														38.726	0.29474		34.9112	0.20667					40.46	0.34322					36.1828	0.29035		36.8186	0.28248					32.0212	0.26278					37.9746	0.3306		37.8012	0.29637
														36.7608	0.29866		36.1828	0.28611					41.7316	0.32128					33.6974	0.26516		35.4892	0.19788					29.6514	0.29435					39.1306	0.33345		38.4948	0.21154
														43.0032	0.24549		36.9342	0.26469					32.079	0.26709					45.3152	0.31293		36.7608	0.27702					37.8012	0.27455					44.3326	0.35355		32.8304	0.24446
														36.0672	0.28406		36.0094	0.29904					36.7608	0.36436					35.3736	0.32643		36.2984	0.25241					43.7546	0.27907					39.7086	0.32588		38.2636	0.31738
														28.9	0.18968		26.6458	0.02211					38.8416	0.32356					33.9286	0.29006		31.7322	0.28714					40.6334	0.3096					44.9684	0.32915		35.547	0.26965
														38.2058	0.30081		29.9982	0.07305					35.4314	0.30926					37.5122	0.2683		41.038	0.32098					35.6048	0.27669					38.2058	0.26361		35.0846	0.26878
														37.3388	0.2407		40.2866	0.27696					48.3208	0.2922					35.7782	0.18478		36.7608	0.3415					31.7322	0.16545					38.726	0.33041		35.7204	0.30776
														33.1194	0.24755		33.6974	0.16316					35.6626	0.25376					34.4488	0.28276		36.5296	0.13873					34.8534	0.07263					32.2524	0.23664		35.0846	0.24687
														34.4488	0.23827		33.1772	0.1909					40.5178	0.32889					34.391	0.28196		34.3332	0.26452					37.7434	0.13466					32.079	0.24449		37.1654	0.24821
														41.905	0.32086		32.5992	0.29945					30.2872	0.2677					34.969	0.3209		34.5066	0.06066					36.6452	0.30862					37.8012	0.34149		32.1946	0.24327
														34.5066	0.22892		37.7434	0.15986					42.0784	0.33842					41.616	0.35721		39.9398	0.24586					39.5352	0.26694					36.8764	0.30656		36.0672	0.18505
														37.6278	0.19712		36.1828	0.13158					32.657	0.21224					33.6396	0.24209		27.2238	0.28334					40.6334	0.29288					39.304	0.30446		40.0554	0.23832
														38.0324	0.25673		38.4948	0.27233					44.217	0.33743					39.4196	0.29721		32.2524	0.24704					35.3158	0.27372					37.9746	0.32453		35.7204	0.25955
														41.3848	0.33213		39.7664	0.21824					37.1076	0.29243					39.015	0.294		33.9286	0.2637					50.6906	0.29163					40.0554	0.33117		32.2524	0.18934
														33.235	0.3071		39.593	0.31552					38.2058	0.23617					30.5184	0.21506		37.859	0.17732					36.414	0.22843					31.0386	0.28835		38.726	0.31673
														37.8012	0.27898		39.7086	0.29547					43.5234	0.27634					32.8882	0.26046		35.2002	0.24996					36.8764	0.31797					41.4426	0.34084		34.391	0.32245
														42.3096	0.3562		39.0728	0.29512					41.616	0.29021					34.3332	0.2034		35.4892	0.1344					31.2698	0.28741					37.3388	0.24325		30.6918	0.16229
														36.703	0.285		39.2462	0.29918					32.4258	0.04173					31.9056	0.25274		40.5178	0.25454					36.6452	0.30311					40.1132	0.29117		39.6508	0.26095
														37.1654	0.26942		37.7434	0.23782					30.5762	0.23174					35.4892	0.3167		43.4656	0.29065					38.4948	0.29168					46.1244	0.21973		41.1536	0.29907
														34.68	0.27446		40.171	0.29855					41.7894	0.29888					42.9454	0.31913		36.992	0.28193					30.1716	0.19988					35.9516	0.3921		40.749	0.26391
														41.4426	0.33247		36.5874	0.26518					38.0324	0.24882					37.6278	0.30131		32.0212	0.20257					33.235	0.19934					35.4314	0.25249		31.5588	0.31738
														35.258	0.29871		34.5066	0.26189					31.8478	0.11744					36.0094	0.29737		35.4314	0.25019					37.859	0.28679					38.437	0.33578		37.3966	0.27138
														32.7726	0.24527		36.7608	0.21257					34.68	0.1968					38.8994	0.30859		31.7322	0.25249					34.6222	0.11375					35.258	0.35564		34.3332	0.3163
														34.9112	0.31196		47.5116	0.30556					36.703	0.24601					33.7552	0.28164		36.8764	0.18947					37.9168	0.30133					32.7148	0.33041		42.2518	0.27408
														43.5234	0.31091		44.5638	0.32324					47.685	0.33437					36.0094	0.31588		35.7782	0.34884					35.6048	0.33466					42.772	0.31835		34.9112	0.11913
														43.4078	0.32927		36.4718	0.25445					39.5352	0.32069					29.6514	0.25334		33.235	0.29035					38.2058	0.27639					39.7086	0.31828		38.6104	0.24129
														28.7844	0.25836		35.6626	0.31363					34.7378	0.31101					41.616	0.27205		37.7434	0.33948					40.9802	0.34449					45.951	0.33371		36.1828	0.24447
														36.703	0.3064		39.0728	0.31496					24.9696	0.04282					35.3736	0.31041		37.9168	0.30316					32.5992	0.20852					36.0094	0.32114		41.905	0.28204
														36.5296	0.28266		43.928	0.31657					38.6682	0.21349					44.2748	0.2837		40.8646	0.30152					34.1598	0.22398					36.5874	0.36463		40.46	0.31524
														36.5296	0.30422		39.304	0.2338					36.2406	0.33149					33.813	0.31898		37.5122	0.36817					29.6514	0.20466					33.1772	0.28449		36.6452	0.27545
														36.6452	0.27379		34.1598	0.33174					36.703	0.16351					37.1076	0.27722		40.0554	0.15864					37.9746	0.30115					33.524	0.24638		27.8018	0.24584
														36.2984	0.33389		26.4146	0.08196					41.6738	0.2884					35.547	0.29789		42.0206	0.32562					42.4252	0.32518					38.3792	0.35096		27.8018	0.24584
														27.455	0.17219		36.4718	0.23903					36.4718	0.26624					35.9516	0.32645		37.1654	0.21493					29.6514	0.27243					44.8528	0.27684		36.2984	0.28675
														34.5644	0.32341		29.5936	0.1838					36.5296	0.32663					39.015	0.29955		38.0324	0.21758					31.3854	0.21949					33.5818	0.28428		31.501	0.24083
														37.9168	0.33161		33.1194	0.16076					37.1076	0.29601					35.7782	0.31421		32.1368	0.22169					37.2232	0.27803					36.5874	0.31183		38.6104	0.24912
														34.102	0.26081		33.4084	0.30802					39.1306	0.34279					34.4488	0.24873		33.2928	0.16497					45.7776	0.30028					35.6048	0.23072		37.1076	0.22358
														40.5756	0.30005		39.882	0.28468					37.6278	0.3162					39.3618	0.29863		36.2406	0.2286					34.5644	0.3096					42.7142	0.2762		42.1362	0.31873
														33.9864	0.24174		36.5874	0.3171					42.8298	0.33364					40.2866	0.30774		43.061	0.36331					34.2176	0.29345					42.194	0.33806		38.6104	0.29118
														31.7322	0.07738		34.4488	0.23288					39.882	0.28936					43.35	0.29713		35.2002	0.22066					42.772	0.26843					37.5122	0.31163		39.8242	0.25362
														35.6048	0.36084		29.189	0.27021					44.3326	0.23228					35.7782	0.31255		42.4252	0.26251					39.7664	0.29527					30.4028	0.32359		31.212	0.24216
														36.3562	0.27239		37.859	0.2701					43.061	0.31297					31.2698	0.28179		31.2698	0.21301					37.6278	0.30444					43.1188	0.32357		33.3506	0.25639
														35.4892	0.24634		36.0672	0.29791					35.7204	0.33079					38.9572	0.31045		33.5818	0.25892					42.5986	0.28865					34.8534	0.30536		34.7956	0.17225
														51.5576	0.21797		30.9808	0.15666					40.3444	0.35104					39.4196	0.30032		31.9634	0.18754					31.501	0.28709					42.5408	0.32556		39.2462	0.27129
														35.3158	0.2987		37.9168	0.21178					36.992	0.34415					41.3848	0.30818		33.0616	0.25711					34.391	0.20521					41.7894	0.32389		33.6396	0.18524
														36.125	0.30983		37.1654	0.32625					45.5464	0.29701					36.5874	0.28344		36.4718	0.2548					36.4718	0.26494					33.6974	0.25184		32.0212	0.27943
														32.7726	0.23126		39.1306	0.25777					42.772	0.30963					37.0498	0.30716		31.1542	0.27962					30.6918	0.23766					50.4594	0.35343		34.391	0.25913
														36.0094	0.29622		39.4196	0.26951					41.6738	0.31397					44.217	0.32149		32.3102	0.26539					39.5352	0.27083					42.9454	0.36556		32.1946	0.1071
														41.2114	0.32221		36.0672	0.26402					38.8416	0.25505					42.0784	0.33109		35.547	0.23818					40.749	0.30446					39.8242	0.29042		31.9634	0.30846
														32.946	0.20359		32.2524	0.15553					38.437	0.29186					37.9746	0.3282		32.5414	0.25865					39.2462	0.30928					32.7726	0.21257		41.2692	0.3013
														34.7378	0.31609		33.235	0.24241					38.6682	0.29714					41.1536	0.322		38.2636	0.07581					36.125	0.28205					36.8186	0.28504		30.2294	0.25645
														38.5526	0.3013		36.992	0.29341					41.0958	0.23324					37.57	0.32523		31.5588	0.25281					32.2524	0.23058					36.7608	0.19616		47.396	0.26119
														36.5874	0.33116		38.3792	0.249					40.9224	0.29658					31.6744	0.16381		39.5352	0.11404					44.3326	0.31551					41.2692	0.325		35.0268	0.30803
														36.125	0.25263		39.7086	0.23966					34.4488	0.18514					38.4948	0.30583		34.68	0.19941					29.5358	0.32782					41.616	0.30813		36.3562	0.31317
														40.9802	0.30199		33.9286	0.28544					42.8298	0.30171					39.882	0.30842		36.5874	0.23276					38.7838	0.31518					39.304	0.32976		37.6856	0.26626
														36.125	0.32794		34.7956	0.29281					35.0846	0.25152					36.125	0.27351		40.1132	0.30584					34.7956	0.26984					40.3444	0.34259		34.9112	0.2832
														36.2406	0.23171		29.5936	0.18304					31.79	0.26522					36.9342	0.27207		32.7148	0.19651					36.8764	0.29259					27.8596	0.33026		35.2002	0.22826
														41.6738	0.31221		36.5296	0.3141					43.4078	0.30542					35.9516	0.30181		38.6104	0.32884					37.6278	0.2999					36.992	0.33326		35.8938	0.12182
														33.3506	0.29763		33.0616	0.17439					36.1828	0.20203					43.5812	0.36557		29.7092	0.21018					40.5178	0.31262					45.3152	0.32496		32.0212	0.21538
														39.9398	0.32207		36.8186	0.24785					32.1368	0.23794					41.6738	0.37885		30.9808	0.17899					36.2984	0.27874					41.038	0.3078		38.8416	0.28465
														34.9112	0.29678		36.5874	0.30698					35.8938	0.25148					38.0324	0.26459		37.7434	0.29837					40.171	0.27991					40.5178	0.29457		38.6682	0.31044
														30.4606	0.22361		30.2294	0.26911					35.6626	0.35474					37.2232	0.25355		32.7726	0.28272					40.9802	0.30125					35.3736	0.26681		40.9224	0.29353
														28.4376	0.23264		31.0386	0.2277					40.1132	0.28054					37.3388	0.28505		40.2288	0.31557					25.8944	0.22301					38.148	0.34659		29.8248	0.19477
														35.0268	0.26805		40.8068	0.29824					39.7086	0.2245					39.4196	0.30553		33.4084	0.27478					42.194	0.23817					38.726	0.32942		27.8596	0.21976
														39.6508	0.35		29.1312	0.24724					38.148	0.34159					40.6912	0.31483		35.6626	0.26308					39.7086	0.30598					33.2928	0.34018		35.4892	0.19396
														33.813	0.25991		38.437	0.32278					40.2866	0.28745					34.2176	0.28794		35.6626	0.27194					38.8416	0.28861					40.4022	0.38388		37.2232	0.27179
														36.4718	0.26505		43.1766	0.30537					35.6626	0.3234					28.2642	0.24354		29.0156	0.20521					35.7204	0.27944					34.68	0.30915		35.7782	0.12293
														34.969	0.25074		33.1772	0.25768					38.6682	0.28936					37.4544	0.31486		28.9578	0.20066					43.928	0.15389					40.9224	0.29226		37.3388	0.19404
														35.547	0.27512		36.1828	0.2687					37.5122	0.33785					38.2636	0.27184		41.905	0.20894					39.5352	0.30018					39.304	0.28446		39.2462	0.15227
														45.084	0.34046		45.084	0.29828					36.2984	0.3217					37.8012	0.306		28.4376	0.14815					35.2002	0.31851					35.6048	0.261		30.2872	0.19603
														38.8416	0.28603		34.2754	0.27484					37.3388	0.26093					39.4196	0.30695		41.3848	0.29365					42.483	0.29444					40.0554	0.31872		37.9746	0.27295
														33.4662	0.26939		41.3848	0.2285					38.6682	0.31669					41.327	0.31094		35.0846	0.20731					40.2288	0.26491					38.437	0.32432		32.2524	0.21722
														31.212	0.31322		33.6974	0.24983					36.3562	0.2026					31.1542	0.28089		36.9342	0.30358					34.8534	0.30848					35.3736	0.2335		34.969	0.31764
														36.5874	0.36409		35.3158	0.10829					29.8248	0.20758					33.1194	0.26935		35.7204	0.30706					40.0554	0.25195					41.1536	0.3104		41.327	0.30079
														33.524	0.22667		38.0902	0.29569					31.6166	0.15346					32.8304	0.28662		33.8708	0.23183					36.5874	0.29252					41.327	0.34023		38.8416	0.28628
														37.5122	0.27919		34.1598	0.27612					31.501	0.23775					37.9746	0.26504		33.3506	0.26334					32.4836	0.21219					35.7204	0.28646		35.7204	0.18393
														37.1654	0.3115		33.9864	0.27608					31.212	0.21101					35.836	0.26483		37.3388	0.32639					39.304	0.29202					42.194	0.31582		37.1654	0.26752
														39.1884	0.32247		32.7726	0.27358					36.1828	0.27041					31.212	0.26023		35.7204	0.27311					38.726	0.27948					36.0094	0.28507		38.5526	0.33007
														39.6508	0.25814		35.836	0.18985					37.6278	0.09733					31.9634	0.15568		36.703	0.2944					31.5588	0.23494					34.391	0.32239		37.1076	0.28873
														38.437	0.32733		34.8534	0.1664					41.1536	0.32284					41.1536	0.35604		37.3966	0.25791					33.2928	0.18608					39.4774	0.35852		31.0386	0.17221
														35.2002	0.30044		23.2934	0.03392					37.57	0.29563					37.7434	0.29668		36.703	0.27225					35.4314	0.19236					34.0442	0.35167		34.2754	0.29725
														33.813	0.31081		38.437	0.31877					38.3792	0.40243					33.6396	0.31742		41.616	0.23668					38.437	0.22959					44.5638	0.33997		46.0666	0.31437
														33.4662	0.29518		36.2406	0.20722					41.2692	0.27458					36.8764	0.33083		32.8882	0.22539					39.0728	0.24334					35.4892	0.25004		32.4258	0.22329
														34.7956	0.27627		32.079	0.25921					35.9516	0.21722					42.4252	0.3189		35.2002	0.29781					32.3102	0.28115					37.3966	0.32237		31.6166	0.08639
														45.1418	0.3062		33.813	0.22651					37.859	0.31386					38.2058	0.31829		36.2406	0.25281					35.0268	0.21569					42.3674	0.31096		37.6278	0.17226
														29.478	0.26215		36.0672	0.29861					35.547	0.30748					35.0268	0.31942		31.79	0.28466					37.3388	0.30604					44.9684	0.32836		38.437	0.25136
														33.524	0.3006		37.7434	0.29909					40.5178	0.31357					33.524	0.17243		35.4892	0.24936					35.1424	0.25718					39.3618	0.30623		39.593	0.29325
														40.5756	0.31598		39.1884	0.32372					38.8994	0.26132					41.8472	0.24815		33.7552	0.28097					42.0206	0.24611					42.3096	0.33708		39.4196	0.26727
														31.0964	0.27834		39.304	0.22879					32.946	0.30131					38.8994	0.30259		33.7552	0.28097					32.8304	0.32594					33.8708	0.22689		28.4376	0.18412
														30.7496	0.31777		37.9168	0.31046					39.8242	0.331					45.4886	0.27902		34.102	0.30113					37.1654	0.26199					40.8068	0.31974		34.969	0.29706
														36.703	0.23968		33.9286	0.2819					36.2406	0.32365					33.5818	0.22856		32.1946	0.29994					34.9112	0.13071					33.7552	0.24214		39.304	0.22609
														34.7956	0.32149		41.905	0.28002					31.6166	0.26736					33.813	0.30123		34.1598	0.0675					35.3736	0.28836					36.7608	0.28124		33.3506	0.31707
														37.9746	0.30567		41.4426	0.28135					32.1946	0.21658					34.4488	0.28934		33.9286	0.26143					39.0728	0.23853					34.3332	0.30482		35.6048	0.22792
														41.6738	0.30871		34.4488	0.2649					34.7378	0.21379					35.547	0.27139		39.4196	0.33058					31.3276	0.20508					48.3786	0.39131		32.4836	0.19722
														34.6222	0.29002		33.813	0.22798					32.657	0.26007					34.102	0.30938		32.4836	0.21673					35.0846	0.24483					35.6048	0.28154		30.1716	0.17608
														35.0846	0.26947		40.1132	0.28484					34.1598	0.25654					45.084	0.32791		32.8304	0.17292					35.9516	0.23957					39.5352	0.30168		31.3276	0.26478
														37.7434	0.32664		31.7322	0.21356					32.3102	0.26869					42.1362	0.33264		29.8826	0.10562					39.4196	0.23597					33.235	0.29348		32.079	0.25523
														35.836	0.31525		32.5992	0.25558					39.6508	0.33918					36.703	0.27888		32.7148	0.26108					29.0734	0.17074					37.5122	0.27527		33.5818	0.30742
														33.5818	0.30846		36.2984	0.29333					44.3904	0.31424					34.5066	0.24872		36.4718	0.20039					34.7378	0.22747					34.9112	0.28129		40.3444	0.2971
														32.3102	0.30903		36.703	0.20171					42.8876	0.36543					33.1772	0.21388		35.3158	0.27589					36.5296	0.32815					38.0902	0.28151		37.3388	0.23546
														39.593	0.33052		37.7434	0.29931					36.0672	0.30028					39.3618	0.33279		38.2636	0.27843					39.2462	0.2289					35.0268	0.24066		35.9516	0.17787
														35.4892	0.25965		37.9168	0.29107					43.8702	0.29375					43.35	0.31589		34.8534	0.25041					41.327	0.3481					37.0498	0.38577		36.6452	0.3238
														33.9864	0.28704		35.7782	0.26688					46.818	0.3202					33.6974	0.22874		35.6626	0.18077					31.79	0.25753					40.4022	0.32731		35.4892	0.29368
														39.7664	0.26695		38.437	0.27749					37.8012	0.32132					40.9224	0.30788		35.3736	0.25633					37.9168	0.25026					40.9224	0.30055		35.4892	0.29368
														33.5818	0.2566		40.2288	0.20417					35.0268	0.20209					42.0206	0.31366		34.7956	0.24586					35.6626	0.18521					43.4078	0.3772		35.6626	0.31195
														46.4134	0.29638		36.4718	0.31569					34.9112	0.36437					38.7838	0.32722		31.4432	0.23644					41.6738	0.11781					31.212	0.24168		36.703	0.2577
														37.281	0.26984		33.4662	0.2071					36.0094	0.30804					36.125	0.23637		40.6334	0.28958					40.6334	0.26332					43.9858	0.31145		36.1828	0.31187
														36.6452	0.30673		39.3618	0.33227					38.3214	0.22305					34.7956	0.32215		36.9342	0.16602					39.882	0.26782					35.3158	0.26232		36.992	0.26456
														31.1542	0.2082		36.7608	0.32504					38.8994	0.2456					33.9286	0.26206		33.2928	0.25188					40.5756	0.32818					41.7894	0.31786		38.8994	0.24993
														32.7148	0.29292		38.8416	0.28791					38.5526	0.17593					39.4196	0.28541		33.6974	0.28341					39.8242	0.25065					35.258	0.31097		42.3674	0.27917
														39.8242	0.26919		37.9746	0.28206					36.4718	0.33851					36.703	0.28163		34.7378	0.34542					39.1306	0.30992					35.4892	0.25519		41.8472	0.2508
														38.9572	0.28877		39.304	0.32104					41.6738	0.28111					40.2288	0.27993		30.2872	0.06899					38.8994	0.27951					45.2574	0.31908		39.6508	0.30148
														37.3388	0.2711		35.4314	0.29285					38.2058	0.29603					33.9864	0.29151		29.0734	0.215					30.1138	0.18547					41.327	0.25103		35.2002	0.26257
														37.7434	0.34137		37.2232	0.24098					39.593	0.36761					32.7148	0.19752		35.7204	0.34064					38.148	0.26571					33.5818	0.26589		31.9056	0.14961
														38.8416	0.29927		35.6626	0.34112					34.8534	0.30826					36.6452	0.31951		40.9802	0.31755					38.5526	0.26429					43.061	0.33728		46.5868	0.32005
														35.4892	0.24837		42.5986	0.3363					34.1598	0.26767					36.414	0.29239		37.5122	0.24245					35.4314	0.29838					32.4258	0.23331		38.0902	0.30297
														37.9168	0.2802		32.368	0.27541					39.593	0.28933					33.235	0.2522		34.2176	0.20116					28.033	0.11573					37.1654	0.31514		29.478	0.13053
														35.836	0.28878		39.882	0.3061					39.4196	0.30773					35.258	0.17293		34.391	0.21719					42.483	0.26268					43.9858	0.22644		35.4892	0.2558
														37.7434	0.34819		43.4656	0.3207					30.9808	0.2629					41.4426	0.26957		36.4718	0.18993					36.5296	0.2999					41.905	0.35721		41.9628	0.29126
														54.621	0.29044		31.8478	0.24002					37.4544	0.29631					40.1132	0.32297		33.8708	0.26177					40.749	0.23095					39.1884	0.21653		41.7894	0.282
														40.9224	0.32198		32.0212	0.17128					42.4252	0.14081					32.2524	0.29898		33.1772	0.19249					33.1194	0.23732					42.0784	0.29197		37.9168	0.28481
														35.258	0.3109		38.0902	0.28171					35.2002	0.31429					37.3388	0.28305		36.8186	0.32688					30.2294	0.19351					42.3096	0.31241		37.281	0.28379
														37.281	0.28413		38.2636	0.22281					38.4948	0.25168					30.056	0.27409		39.8242	0.23938					32.4258	0.23525					31.9634	0.28741		40.9802	0.2421
														38.2636	0.29063		32.4836	0.21798					33.813	0.29679					33.8708	0.31775		42.2518	0.30134					26.7036	0.17547					44.1014	0.30146		36.2984	0.18142
														37.6278	0.31236		33.524	0.23605					35.7782	0.33141					36.8764	0.30256		38.3792	0.10277					35.4314	0.28509					40.749	0.28741		35.0268	0.2605
														38.3214	0.33153		38.5526	0.29535					38.5526	0.34674					33.1772	0.21249		44.4482	0.28732					35.2002	0.31803					28.4954	0.29066		32.7148	0.2053
														39.4196	0.2219		38.3792	0.29004					40.4022	0.30658					44.217	0.31056		29.9404	0.19592					42.9454	0.02615					34.7956	0.28504		35.6626	0.31424
														32.368	0.2952		37.9746	0.30576					37.3966	0.3413					39.9976	0.2935		33.6396	0.26782					34.4488	0.21571					36.8186	0.32351		37.6856	0.2223
														37.3966	0.30161		40.5756	0.32091					36.0672	0.31113					40.5756	0.29972		29.8826	0.23651					35.3158	0.29037					38.5526	0.29992		33.4662	0.2897
														33.3506	0.23672		37.859	0.27545					35.258	0.31122					39.9976	0.33927		39.2462	0.30042					38.2058	0.26872					28.0908	0.25139		41.7316	0.27524
														39.9398	0.29155		34.2176	0.20207					38.148	0.29428					36.125	0.2358		37.2232	0.22485					38.437	0.32594					41.5582	0.3126		44.7372	0.3361
														37.4544	0.26976		39.5352	0.28295					41.3848	0.29921					32.4836	0.13309		35.4314	0.19596					32.4836	0.19336					43.5812	0.3696		40.8068	0.31035
														33.8708	0.32106		41.2692	0.32456					42.5408	0.30136					38.6682	0.29284		36.5874	0.29925					35.3736	0.22759					39.593	0.29052		36.3562	0.27068
														39.8242	0.24001		36.414	0.1865					36.2984	0.27201					37.57	0.22566		28.611	0.1731					39.5352	0.27988					38.726	0.338		30.634	0.28819
														41.5582	0.33116		39.882	0.34113					36.1828	0.30965					36.3562	0.25959		35.3736	0.20239					40.0554	0.29537					39.9398	0.26524		37.9746	0.31175
														43.8124	0.29327		37.57	0.25658					43.2344	0.3212					29.0156	0.05062		38.726	0.31889					38.6104	0.23288					41.038	0.33938		46.7602	0.32523
														34.2754	0.27938		40.2288	0.20446					43.061	0.37436					39.2462	0.32162		42.6564	0.31589					33.6974	0.28755					34.7956	0.31097		31.79	0.07211
														36.3562	0.28069		36.703	0.22567					38.3214	0.28854					43.6968	0.2989		34.7378	0.24631					40.6912	0.31485					34.7378	0.28341		41.0958	0.31486
														34.5066	0.29172		37.281	0.28625					33.3506	0.25553					33.1194	0.27825		28.1486	0.19284					30.6918	0.25698					36.5874	0.31278		37.4544	0.25491
														41.3848	0.29593		39.882	0.2217					44.4482	0.31638					34.6222	0.21481		36.7608	0.29893					26.7614	0.21827					37.5122	0.31244		27.9174	0.20101
														38.8994	0.3109		42.5408	0.31624					42.4252	0.29405					36.7608	0.30328		34.3332	0.24989					37.3388	0.27551					38.437	0.33147		31.79	0.2695
														34.0442	0.27092		36.992	0.25153					38.3792	0.29983					37.1076	0.21452		42.0206	0.34913					37.9168	0.23752					41.7316	0.29313		35.4314	0.24816
														38.2058	0.28883		39.9398	0.26597					40.6334	0.33424					32.079	0.3452		38.437	0.28464					43.1188	0.2467					38.4948	0.33661		29.0734	0.07116
														37.4544	0.32822		30.7496	0.18208					38.3214	0.34078					32.1946	0.28684		36.0094	0.22234					37.1654	0.28688					38.3214	0.34119		37.281	0.27701
														38.6104	0.27597		31.0964	0.29916					31.0386	0.29684					38.7838	0.28229		35.258	0.30712					28.4954	0.17898					30.4028	0.25645		33.4084	0.3061
														39.1306	0.28635		32.5992	0.14016					37.3966	0.11953					33.1772	0.29961		32.7726	0.17343					39.593	0.24841					38.2636	0.34975		38.0902	0.31188
														38.4948	0.34775		42.194	0.35861					40.9224	0.26437					34.1598	0.25056		29.8248	0.15257					37.57	0.3608					43.5234	0.38854		34.2176	0.01759
														39.1884	0.29004		37.8012	0.25959					41.1536	0.25957					33.9286	0.27217		38.726	0.30719					42.5986	0.30294					40.6334	0.30214		37.3388	0.34668
														32.368	0.28282		35.4314	0.21956					37.5122	0.26795					38.7838	0.31253		38.8994	0.26489					37.5122	0.28367					27.166	0.2352		38.3792	0.32425
														39.8242	0.29032		28.0908	0.30661					41.3848	0.31488					47.1648	0.33218		39.3618	0.27568					43.2922	0.28882					40.4022	0.26037		43.6968	0.28115
														35.2002	0.29838		38.4948	0.31213					37.8012	0.2545					34.1598	0.28069		33.6974	0.19994					36.2406	0.27137					33.4662	0.25352		39.0728	0.31374
														34.6222	0.22698		34.4488	0.30388					38.4948	0.29167					42.772	0.3256		33.1772	0.1767					32.368	0.2036					39.7664	0.2869		32.8882	0.31651
														38.9572	0.21848		39.0728	0.3251					36.4718	0.26039					34.2176	0.25865		34.7378	0.31943					36.703	0.26725					43.4656	0.32637		34.5066	0.33979
														33.6396	0.22927		39.8242	0.24607					41.327	0.29804					33.5818	0.26429		34.4488	0.28037					39.1884	0.25847					36.5874	0.35048		33.0616	0.1801
														34.8534	0.2438		37.0498	0.26786					35.547	0.33372					41.6738	0.3209		43.0032	0.31549					35.2002	0.18098					38.148	0.342		36.703	0.25287
														36.0672	0.27964		42.483	0.31507					45.4308	0.33071					34.5066	0.30117		26.4724	0.16931					35.258	0.29573					38.148	0.342		28.2064	0.1689
														36.3562	0.3324		37.1076	0.33088					29.0734	0.26267					26.3568	0.14268		36.703	0.22228					33.3506	0.29971					36.1828	0.31653		34.8534	0.24377
														37.2232	0.29852		36.5874	0.2533					48.8988	0.35596					40.749	0.24261		42.3674	0.29729					35.7204	0.26273					44.1014	0.32868		38.2636	0.20326
														36.4718	0.27308		37.1076	0.31468					41.7316	0.34199					28.322	0.1189		34.7956	0.31593					34.8534	0.18986					39.9976	0.31341		41.5582	0.31424
														32.657	0.29782		36.5874	0.27849					36.5296	0.32931					31.4432	0.29117		37.859	0.20733					21.7328	0.03802					35.7782	0.3446		38.2636	0.24984
														34.0442	0.25496		33.524	0.34011					29.7092	0.23375					33.7552	0.3112		33.4662	0.34768					34.0442	0.19312					43.5812	0.30885		35.9516	0.29432
														35.1424	0.21205		34.3332	0.25956					38.0324	0.29516					38.6682	0.28504		32.8882	0.33106					36.5296	0.28327					39.593	0.27854		33.524	0.22273
														33.0616	0.25914		35.836	0.26668					39.5352	0.28995					45.6042	0.32227		32.657	0.17738					34.391	0.21065					32.5414	0.21089		37.859	0.32156
														34.4488	0.29138		41.3848	0.33179					34.68	0.27599					35.7204	0.24025		31.79	0.2016					33.7552	0.25506					33.1772	0.23515		39.2462	0.24902
														39.7086	0.29615		41.2692	0.28849					36.3562	0.30865					39.5352	0.29293		40.6912	0.27526					35.1424	0.29078					39.7086	0.38437		34.5644	0.19088
														35.0268	0.2843		37.9168	0.2715					40.4022	0.36526					35.547	0.21174		40.8646	0.17483					29.5358	0.24759					41.6738	0.34085		33.4084	0.2268
														38.7838	0.31496		32.368	0.24935					43.4656	0.33112					39.7086	0.32298		34.2754	0.19668					36.1828	0.25247					40.6912	0.32489		37.57	0.24651
														37.57	0.29972		37.6856	0.23838					43.061	0.34866					42.3674	0.31177		26.588	0.10734					28.322	0.1612					40.749	0.29684		39.2462	0.24484
														32.1946	0.23203		40.4022	0.21522					33.6396	0.23147					43.2344	0.28876		37.0498	0.17124					30.634	0.25375					38.2058	0.3068		31.9634	0.1769
														32.3102	0.31159		37.5122	0.33564					39.4196	0.31017					40.4022	0.27726		34.391	0.18239					34.9112	0.25833					39.0728	0.34894		37.57	0.24057
														37.1076	0.34276		40.4022	0.3137					35.1424	0.31513					33.524	0.28497		39.593	0.34687					41.2114	0.20945					36.9342	0.33195		33.9864	0.2687
														35.3158	0.30537		27.8018	0.29465					44.8528	0.28356					35.547	0.23243		39.1884	0.21861					33.7552	0.29271					35.9516	0.28172		35.0846	0.23958
														37.8012	0.28419		42.5408	0.2129					40.3444	0.31621					38.8994	0.28234		39.1884	0.21861					51.3842	0.17435					43.2922	0.36204		37.859	0.27574
														40.46	0.29136		42.2518	0.30459					40.2866	0.27586					40.2866	0.32109		29.9982	0.09844					35.836	0.28032					42.7142	0.31812		33.7552	0.1413
														41.3848	0.31035		29.3624	0.25692					38.726	0.27218					35.3736	0.2704		32.0212	0.22454					28.6688	0.30814					38.9572	0.32468		32.5414	0.19454
														40.4022	0.30636		37.1076	0.2537					40.9802	0.34761					35.836	0.31042		33.3506	0.19059					32.1946	0.30721					36.125	0.29696		34.3332	0.29775
														31.501	0.27375		32.8882	0.22795					35.2002	0.24895					41.2114	0.32265		37.9168	0.25004					33.0038	0.28651					39.304	0.34947		46.4134	0.2046
														35.1424	0.27651		32.7726	0.25578					30.9808	0.32455					35.8938	0.26925		26.1256	0.1667					33.1194	0.27017					44.1014	0.3456		34.9112	0.19675
														33.524	0.33893		38.7838	0.30311					41.2114	0.28348					38.6682	0.33814		36.992	0.25266					37.9168	0.33112					33.1194	0.26542		33.6974	0.26634
														37.9168	0.31057		31.6166	0.23255					37.6856	0.26049					42.483	0.31903		35.8938	0.20095					39.7664	0.27676					40.4022	0.33044		35.4314	0.22579
														40.5178	0.31042		37.9746	0.33788					36.0672	0.23384					36.125	0.21808		42.8876	0.31501					38.6682	0.27625					41.2692	0.31155		42.8876	0.3006
														44.3326	0.35141		34.2176	0.29769					28.0908	0.16151					33.6974	0.27473		38.8994	0.30126					36.4718	0.2737					33.4662	0.19364		36.5296	0.21417
														33.0038	0.18927		36.2406	0.31018					37.9168	0.29419					41.038	0.24053		32.3102	0.13718					31.9056	0.25674					35.836	0.28789		39.7664	0.31921
														37.859	0.30591		40.3444	0.32043					41.327	0.31888					33.6396	0.30752		35.3736	0.27192					36.703	0.30604					33.4662	0.2973		39.3618	0.29112
														42.194	0.31896		47.0492	0.36627					36.7608	0.36034					33.1194	0.25769		44.1592	0.37817					36.3562	0.2292					33.0038	0.26171		39.304	0.27844
														34.1598	0.26725		35.6626	0.26608					39.3618	0.28605					35.0846	0.20418		33.235	0.17757					36.3562	0.24035					44.2748	0.28779		40.8646	0.28013
														35.258	0.27048		44.1014	0.26191					34.8534	0.36299					37.8012	0.30807		35.836	0.26379					36.0672	0.28201					31.7322	0.1856		33.3506	0.20828
														35.6048	0.3139		32.5414	0.21759					36.3562	0.23846					33.6974	0.29995		33.1194	0.18139					35.4892	0.2998					37.8012	0.27251		34.68	0.18461
														28.9578	0.19176		32.2524	0.28115					42.3674	0.31524					39.9976	0.33342		29.8826	0.23811					35.2002	0.27836					40.9802	0.29276		34.68	0.23389
														36.5296	0.32591		35.1424	0.30158					35.547	0.26572					28.611	0.22022		29.6514	0.24807					38.8416	0.2641					33.813	0.24672		39.8242	0.34499
														38.6104	0.28901		33.6974	0.26192					37.3388	0.19651					31.8478	0.30021		33.4662	0.14902					42.4252	0.33342					40.0554	0.32354		33.7552	0.2692
														43.0032	0.33739		31.212	0.2949					42.9454	0.25531					41.038	0.34437		38.8994	0.2791					37.6856	0.34368					43.2922	0.28096		43.5234	0.29829
														35.8938	0.25777		35.6626	0.35094					38.148	0.30458					35.6048	0.22236		35.4314	0.27937					32.368	0.26506					43.1766	0.33154		30.6918	0.27132
														44.1592	0.29588		37.6278	0.24427					38.4948	0.313					39.015	0.26986		36.5874	0.27919					38.8994	0.20575					41.2692	0.32798		38.8994	0.22795
														36.0672	0.27272		35.0268	0.26576					34.2754	0.29477					34.969	0.3262		36.6452	0.2454					39.7086	0.28503					41.038	0.32036		32.368	0.28173
														41.7894	0.34065		27.455	0.08057					35.4314	0.26093					36.9342	0.28966		39.3618	0.28226					34.1598	0.26824					23.8714	0.06043		42.1362	0.30984
														33.2928	0.26364		35.6626	0.31778					41.2114	0.34375					33.6396	0.20961		42.8876	0.19488					39.4774	0.32866					39.4196	0.31941		36.992	0.27039
														30.8652	0.05531		34.1598	0.28323					37.859	0.3018					42.5986	0.30837		40.6334	0.30105					30.923	0.29079					35.2002	0.30664		30.4028	0.19575
														33.8708	0.36148		36.414	0.30459					37.6856	0.30735					39.9976	0.35374		37.9168	0.26398					40.1132	0.31123					34.102	0.34407		32.079	0.2225
														35.6626	0.28768		32.5414	0.16358					44.8528	0.33187					32.0212	0.28187		30.8652	0.22585					34.68	0.24398					38.726	0.27087		32.079	0.19034
														38.726	0.20742		41.0958	0.2845					46.24	0.23035					40.171	0.29224		37.9746	0.28841					33.235	0.21904					41.327	0.35632		34.6222	0.30838
														27.6284	0.19332		30.634	0.23036					41.5582	0.32866					41.2114	0.30458		36.2406	0.29314					32.946	0.12613					32.4258	0.28071		36.992	0.28321
														38.726	0.28031		40.0554	0.30031					34.0442	0.2931					41.616	0.32013		29.3046	0.26343					36.2406	0.30319					37.57	0.29822		47.7428	0.28363
														39.3618	0.32192		36.125	0.20091					38.8994	0.27146					32.8882	0.18169		33.9286	0.2448					28.611	0.19978					36.7608	0.31923		35.836	0.28116
														37.9168	0.28836		37.3388	0.26048					38.2636	0.29199					41.2692	0.31387		35.1424	0.27416					32.2524	0.25617					35.7782	0.36884		36.125	0.31164
														37.6278	0.28612		35.0846	0.33256					40.2288	0.3077					37.5122	0.21444		34.0442	0.30077					38.3214	0.28252					36.0094	0.251		35.3736	0.31291
														37.8012	0.33597		36.1828	0.16379					37.9168	0.25277					37.57	0.21894		33.0616	0.24811					36.0672	0.27543					32.079	0.2408		38.726	0.28644
														38.3792	0.26729		33.2928	0.25655					38.148	0.32669					35.6626	0.32839		41.1536	0.32835					37.0498	0.22952					38.3792	0.27686		35.2002	0.33268
														33.7552	0.19408		34.7956	0.26753					37.4544	0.32655					40.171	0.30178		37.8012	0.18108					38.6104	0.27487					39.1884	0.29854		33.6974	0.14338
														32.079	0.25797		27.8018	0.17328					34.2176	0.32089					51.6732	0.26337		36.7608	0.22917					31.2698	0.21851					39.6508	0.31801		42.5408	0.32298
														41.7894	0.30738		36.6452	0.28369					36.4718	0.30219					37.1076	0.2688		39.5352	0.28261					33.6396	0.20487					38.9572	0.39898		36.992	0.26509
														43.1188	0.32765		44.6794	0.28919					37.0498	0.3123					34.0442	0.27462		36.414	0.32716					35.0846	0.20235					39.8242	0.32532		45.1418	0.24544
														30.1138	0.26549		43.928	0.32081					40.8068	0.2812					31.3854	0.18651		47.4538	0.33158					36.1828	0.29243					42.5408	0.36281		34.9112	0.24686
														37.5122	0.30498		32.946	0.21027					38.437	0.3227					37.859	0.28994		35.7204	0.33004					36.0672	0.32699					34.7956	0.24441		39.1306	0.29986
														35.6048	0.19831		41.038	0.30438					38.8994	0.30869					35.1424	0.25039		33.4084	0.27034					32.8304	0.25138					36.9342	0.29997		36.3562	0.23952
														41.5004	0.27844		35.6626	0.27095					35.3158	0.30925					38.148	0.26265		33.9286	0.02326					36.5296	0.29461					38.9572	0.35641		36.3562	0.17742
														36.992	0.33611		35.4314	0.25584					36.7608	0.28235					42.3096	0.32112		35.0268	0.19962					43.5812	0.22485					41.9628	0.28264		38.3214	0.33137
														33.3506	0.24427		31.1542	0.25977					34.2176	0.22267					36.5296	0.29131		35.2002	0.22307					36.125	0.28523					42.772	0.314		34.8534	0.20392
														31.7322	0.24013		35.2002	0.15045					38.2058	0.34124					39.1884	0.30253		33.9864	0.13844					37.8012	0.34891					37.281	0.32446		31.6166	0.25364
														32.8304	0.22485		45.1418	0.30828					39.8242	0.31115					36.992	0.28008		41.0958	0.30019					34.2754	0.32043					38.0324	0.34315		36.703	0.25262
														25.8944	0.30568		32.5414	0.29466					38.3792	0.1751					31.6744	0.25766		36.703	0.22922					33.0616	0.25151					41.2692	0.34721		36.703	0.25262
														36.992	0.23855		29.478	0.18432					38.148	0.2369					33.5818	0.2577		32.657	0.26294					31.6166	0.2564					37.6278	0.35095		34.9112	0.30788
														36.3562	0.29186		41.2692	0.29636					38.2058	0.24023					37.57	0.29861		42.5986	0.32789					35.547	0.29988					39.0728	0.32261		36.125	0.2626
														35.6626	0.29097		41.6738	0.30482					34.6222	0.24503					31.6166	0.29462		41.2692	0.2695					34.1598	0.28971					40.6912	0.28402		32.2524	0.21628
														33.1772	0.30135		37.5122	0.24763					34.969	0.22695					33.1772	0.29199		40.2866	0.35515					39.9398	0.34982					38.148	0.2892		28.322	0.19133
														31.3276	0.19167		43.35	0.31786					38.3214	0.27665					34.8534	0.30732		38.148	0.18518					38.2058	0.29588					44.8528	0.28262		33.1194	0.28552
														33.524	0.24087		36.125	0.26724					40.8646	0.32529					35.6048	0.29612		36.5296	0.35637					34.391	0.26492					31.9634	0.2137		39.9398	0.29937
														34.969	0.29629		35.4892	0.31586					38.7838	0.33453					33.1772	0.30079		38.8416	0.30382					34.68	0.20017					42.0206	0.33266		33.2928	0.29922
														52.9448	0.21223		38.7838	0.31386					36.5296	0.27686					39.7664	0.35369		34.4488	0.2933					29.3046	0.19226					37.0498	0.29798		43.8124	0.27604
														39.882	0.29307		24.7962	0.25078					39.8242	0.33059					37.8012	0.29682		35.1424	0.19003					37.0498	0.30503					37.9168	0.30751		31.9056	0.24846
														36.8186	0.31134		26.1834	0.07527					42.3096	0.28743					35.3158	0.26785		29.1312	0.11584					35.4314	0.27291					44.0436	0.35475		37.6856	0.28467
														38.4948	0.30152		39.2462	0.27622					39.1306	0.27143					33.2928	0.29909		32.079	0.11396					40.1132	0.30873					36.4718	0.33878		41.5004	0.32084
														36.414	0.29098		38.6104	0.28346					34.5066	0.29206					32.5992	0.22321		41.3848	0.30649					36.6452	0.28698					34.4488	0.22265		38.2636	0.20954
														38.8994	0.31255		39.4196	0.29638					37.57	0.28318					35.3158	0.2704		33.8708	0.28342					33.2928	0.2027					37.281	0.26329		34.4488	0.26197
														37.9746	0.33756		36.9342	0.29265					39.304	0.22413					40.46	0.34697		36.1828	0.17584					31.501	0.2487					40.171	0.33297		35.0268	0.27572
														31.5588	0.26191		38.0324	0.29119					30.4606	0.13119					37.1076	0.20663		36.0672	0.22586					36.2406	0.28267					36.0672	0.31981		40.749	0.15645
														35.4892	0.28699		34.969	0.3339					32.946	0.35974					42.5986	0.31869		30.2872	0.2896					33.0038	0.17986					41.7316	0.32528		49.2456	0.1681
														34.4488	0.24082		31.501	0.26262					32.7148	0.07472					35.4314	0.32154		33.4662	0.20278					31.212	0.28126					42.2518	0.24038		35.6626	0.25213
														37.859	0.26134		37.2232	0.22883					37.281	0.27268					40.5756	0.291		39.4196	0.19113					34.7956	0.28588					38.8994	0.34957		27.455	0.05781
														39.304	0.30656		38.7838	0.27466					32.4258	0.20224					37.859	0.25462		36.125	0.17882					33.4662	0.19547					41.327	0.30041		27.455	0.05781
														37.3966	0.27875		35.836	0.21811					41.616	0.32581					39.4196	0.3027		27.9752	0.17835					36.4718	0.30338					43.2922	0.33892		37.3966	0.28479
														43.4656	0.31637		37.6278	0.29546					46.3556	0.3377					35.2002	0.32172		29.3624	0.24688					28.6688	0.17982					36.7608	0.31878		33.524	0.2909
														40.8646	0.30398		39.882	0.27786					36.0094	0.27463					34.7956	0.30833		36.4718	0.35142					30.5762	0.26463					37.281	0.29381		39.8242	0.27697
														35.4892	0.27947		32.1368	0.1975					39.7086	0.20468					36.2406	0.28939		34.5066	0.30965					38.0324	0.27724					41.8472	0.35506		38.3214	0.23116
														35.8938	0.32091		28.611	0.1926					44.217	0.25201					39.3618	0.3029		39.1306	0.31544					34.5066	0.23895					38.437	0.34196		29.8826	0.23117
														33.2928	0.25766		34.2754	0.193					38.0324	0.31697					39.7664	0.30446		36.992	0.31219					33.7552	0.2286					39.7086	0.17732		35.0846	0.17037
														37.9746	0.25237		36.9342	0.31881					36.414	0.28977					36.4718	0.21241		34.7956	0.20734					38.8994	0.24374					36.0094	0.26322		33.9286	0.16886
														44.6794	0.34038		35.6048	0.33681					43.1188	0.29786					39.304	0.30431		34.1598	0.29134					33.4662	0.31273					36.6452	0.30439		33.0616	0.27883
														32.2524	0.27107		36.703	0.26214					31.8478	0.21946					31.9634	0.2698		32.7148	0.17226					29.8826	0.0128					42.194	0.32888		40.46	0.34069
														36.7608	0.28893		36.703	0.22765					38.8416	0.3354					39.0728	0.32575		38.0324	0.27255					35.0268	0.29441					41.0958	0.37541		36.0672	0.18706
														38.0324	0.21641		44.0436	0.30523					35.7782	0.28014					35.547	0.24905		31.0386	0.13076					32.946	0.23148					39.9398	0.35087		36.414	0.31995
														37.3388	0.29526		34.391	0.31869					35.8938	0.30309					32.8882	0.23716		31.8478	0.21784					33.0038	0.24949					38.4948	0.24717		26.7614	0.15586
														39.9398	0.36385		37.6278	0.30929					39.0728	0.26217					38.9572	0.31115		35.6048	0.20733					38.2636	0.30193					37.6278	0.32623		39.015	0.27839
														40.5178	0.30714		36.7608	0.22964					42.3096	0.29151					36.0672	0.21959		37.57	0.27873					35.547	0.29679					34.3332	0.26068		38.6682	0.28722
														33.5818	0.3383		34.102	0.26904					26.299	0.11452					32.5414	0.26675		33.8708	0.20545					44.9106	0.31101					37.6278	0.2693		27.9174	0.08625
														36.2406	0.30345		31.5588	0.13072					29.4202	0.24664					34.68	0.2616		42.194	0.29181					34.0442	0.22405					41.2692	0.31886		40.2288	0.26082
														30.9808	0.31001		39.5352	0.27833					34.9112	0.27022					32.4258	0.30074		32.3102	0.22308					40.4022	0.3004					38.2058	0.29386		31.8478	0.21506
														37.2232	0.32093		36.9342	0.31029					39.015	0.27069					39.8242	0.29649		36.2984	0.29262					33.2928	0.29174					34.0442	0.29848		33.0616	0.20268
														39.593	0.33243		35.3736	0.22002					30.8652	0.27004					29.1312	0.24163		34.6222	0.31766					32.3102	0.21392					45.4308	0.3304		34.391	0.17101
														33.6974	0.17092		34.68	0.18246					37.3388	0.31368					39.9976	0.31342		36.992	0.3249					39.9976	0.28015					41.2114	0.29277		31.8478	0.17496
														37.4544	0.28528		34.5066	0.29616					44.4482	0.33465					41.2114	0.35265		40.3444	0.3262					38.9572	0.27709					38.8416	0.31964		34.7378	0.30498
														27.9752	0.23136		37.9746	0.27864					35.7204	0.26381					31.3854	0.32339		33.1772	0.15891					38.9572	0.27709					34.102	0.23194		35.4314	0.33308
														31.3854	0.2172		34.3332	0.2792					34.3332	0.32608					32.657	0.29174		34.1598	0.29363					38.8994	0.22828					39.3618	0.29682		40.5756	0.28656
														32.5414	0.2477		36.5296	0.32013					38.3214	0.3396					37.6856	0.32402		30.1138	0.19025					29.8248	0.21019					37.1076	0.33983		35.6048	0.27459
														41.0958	0.29945		38.4948	0.30569					35.7204	0.31162					28.5532	0.11951		38.2058	0.19326					32.0212	0.18085					41.4426	0.30494		36.2406	0.34297
														36.4718	0.29299		36.8764	0.2996					38.8994	0.3014					36.1828	0.33983		38.5526	0.2618					39.6508	0.30689					34.391	0.27273		32.1368	0.29343
														33.1194	0.32061		40.2866	0.28687					42.0206	0.30187					37.859	0.33207		43.061	0.30696					33.813	0.16861					32.946	0.34733		38.148	0.29809
														41.9628	0.30289		35.7782	0.20778					44.0436	0.33913					44.9684	0.34243		32.5414	0.28532					44.6794	0.32592					34.2176	0.31459		30.9808	0.22975
														40.1132	0.29406		37.7434	0.30655					39.882	0.32765					38.148	0.19154		38.4948	0.26767					37.0498	0.29232					36.414	0.32582		36.6452	0.29017
														36.2406	0.21803		33.3506	0.21005					37.6856	0.27828					44.1014	0.35032		39.5352	0.16412					34.7378	0.27492					44.506	0.31587		31.1542	0.22631
														35.3736	0.27461		39.015	0.25992					36.7608	0.2678					42.483	0.31515		40.8646	0.17991					41.038	0.32262					38.0324	0.34486		32.657	0.2414
														36.2984	0.31908		34.7378	0.26241					37.6856	0.29866					35.6626	0.30069		35.4314	0.28502					38.726	0.22961					38.437	0.30677		30.1716	0.25221
														35.4314	0.31546		36.8764	0.28888					35.9516	0.21392					37.0498	0.16673		40.171	0.26148					34.68	0.27516					35.6048	0.32446		40.6912	0.29391
														37.57	0.28343		40.2288	0.34854					38.6104	0.28057					38.437	0.26656		36.1828	0.17423					39.8242	0.27112					37.0498	0.29925		38.437	0.2511
														37.8012	0.30764		35.7782	0.31546					43.8702	0.2889					31.6166	0.26679		36.125	0.29423					45.373	0.30221					36.6452	0.2965		42.194	0.33976
														38.7838	0.25517		35.3736	0.19736					48.0318	0.33736					31.8478	0.20598		36.8764	0.17691					37.859	0.30691					40.2866	0.28798		32.0212	0.27937
														38.0324	0.24322		40.171	0.30964					36.2984	0.30749					35.836	0.24201		28.611	0.29789					37.3966	0.29319					43.8124	0.31475		34.4488	0.16914
														31.212	0.10063		34.4488	0.23872					39.304	0.32121					38.4948	0.30638		32.5414	0.21509					36.703	0.29281					36.5874	0.29633		34.8534	0.31016
														33.524	0.17174		33.0616	0.25562					35.2002	0.25326					30.923	0.19153		36.5874	0.31886					35.8938	0.26238					35.7204	0.26571		34.969	0.30434
														31.0964	0.21254		44.4482	0.28438					37.5122	0.22424					38.3214	0.303		35.547	0.32914					42.0206	0.29031					32.7726	0.24544		39.4196	0.13205
														39.882	0.28818		39.593	0.27166					29.7092	0.24564					39.9398	0.30709		39.7086	0.24378					37.1076	0.28858					40.5756	0.32391		34.2754	0.31819
														38.4948	0.29752		38.4948	0.33295					42.0784	0.3367					48.263	0.31208		33.1194	0.2411					34.9112	0.2761					42.194	0.31814		37.1076	0.10892
														38.726	0.26323		36.8764	0.27653					40.5178	0.28271					36.414	0.26976		31.5588	0.21838					40.6912	0.31497					39.882	0.304		38.0324	0.31988
														30.923	0.17856		33.6974	0.27044					30.4606	0.11895					43.5234	0.33795		33.4084	0.173					30.8652	0.32995					38.2058	0.29357		38.7838	0.29717
														38.6104	0.30652		25.8944	0.05949					41.616	0.30374					42.8298	0.31159		33.6396	0.27722					30.8074	0.2799					38.0324	0.32012		37.57	0.32554
														34.5644	0.24889		41.9628	0.27765					33.6396	0.24916					38.148	0.33731		37.281	0.29558					36.992	0.28974					39.3618	0.27425		37.1654	0.24344
														40.0554	0.31381		31.79	0.14809					36.5874	0.20691					33.4084	0.24452		37.9168	0.28116					35.6626	0.30699					35.7204	0.3491		31.212	0.25259
														36.8186	0.26672		32.8304	0.18898					45.5464	0.2897					37.2232	0.28928		33.2928	0.2561					34.102	0.30801					44.5638	0.30717		36.1828	0.28257
														43.9858	0.30638		39.2462	0.28959					37.6278	0.28022					38.6682	0.21719		40.8068	0.32416					34.9112	0.3126					40.171	0.32636		30.8652	0.12405
														30.8074	0.26572		38.9572	0.26416					35.3736	0.29015					36.125	0.24228		33.1194	0.28994					37.57	0.32301					38.726	0.33976		53.1182	0.33347
														41.5004	0.31299		46.529	0.26653					32.1946	0.33421					32.1946	0.25968		32.8882	0.21305					27.455	0.18302					33.524	0.36065		37.3966	0.28734
														33.1772	0.19347		29.8826	0.20993					39.015	0.23944					37.7434	0.29539		33.0616	0.2083					33.235	0.31578					32.946	0.25599		38.437	0.33429
														33.524	0.29313		30.2294	0.27472					36.0672	0.24668					34.1598	0.24115		33.2928	0.26569					40.6334	0.30747					35.2002	0.32806		35.3158	0.29231
														45.4886	0.30652		38.8994	0.29885					35.1424	0.234					38.2636	0.3221		32.2524	0.26546					38.2636	0.26319					37.2232	0.29822		41.7894	0.28569
														27.9174	0.06513		32.7148	0.26604					33.6396	0.28641					36.0094	0.31855		39.882	0.27734					41.616	0.3077					52.3668	0.36512		32.0212	0.28189
														37.281	0.25834		28.1486	0.04369					42.2518	0.30089					33.813	0.3455		39.304	0.32058					33.235	0.23524					40.6912	0.33645		35.4892	0.19165
														36.8186	0.29644		37.9746	0.30294					40.5178	0.34537					31.3854	0.18689		30.1138	0.20467					35.4314	0.31526					36.5296	0.22921		37.5122	0.16287
														38.0324	0.27383		37.0498	0.27848					39.6508	0.2381					30.7496	0.26092		39.7086	0.17147					36.0672	0.18648					39.1884	0.33796		35.2002	0.24398
														33.3506	0.31737		34.9112	0.32244					42.1362	0.34317					40.1132	0.31617		33.8708	0.32551					34.1598	0.24922					36.8186	0.28017		37.5122	0.2072
														35.0846	0.28313		37.859	0.18614					39.9398	0.27666					41.5004	0.32084		29.767	0.22098					36.5296	0.30683					37.5122	0.31415		25.4898	0.02672
														36.992	0.33625		42.483	0.29894					41.0958	0.25444					41.327	0.28611		34.9112	0.30249					35.258	0.27191					30.056	0.07299		34.3332	0.2987
														35.3736	0.28248		32.4836	0.29293					41.2114	0.35494					37.859	0.30385		38.2636	0.28819					29.5936	0.23					41.038	0.31715		35.3736	0.26019
														33.4662	0.26602		39.1884	0.30657					42.5408	0.32519					38.148	0.30414		33.1772	0.17353					34.68	0.13025					40.4022	0.2982		34.7378	0.2855
														33.813	0.30573		41.616	0.33278					41.3848	0.28085					39.8242	0.32092		33.6396	0.2381					29.2468	0.10837					42.0206	0.34858		34.3332	0.0106
														45.1418	0.28427		48.2052	0.30767					32.946	0.30989					39.9976	0.35503		34.7956	0.18814					35.9516	0.29352					42.7142	0.31669		37.1076	0.23465
														31.501	0.28707		45.951	0.31051					39.3618	0.30009					36.2984	0.32131		34.1598	0.19786					40.4022	0.27595					30.4606	0.19633		36.2406	0.30627
														32.3102	0.20046		38.8416	0.30461					38.5526	0.2878					39.8242	0.31828		37.8012	0.23965					34.5066	0.21817					32.7148	0.11208		34.9112	0.1644
														42.9454	0.3285		31.3854	0.21925					36.992	0.33784					34.68	0.30533		34.391	0.32719					31.3854	0.28292					45.1996	0.33609		35.0846	0.20389
														30.5184	0.26326		31.2698	0.29096					37.5122	0.13191					46.4134	0.00746		34.969	0.18538					36.9342	0.25593					40.171	0.34679		38.148	0.3466
														35.9516	0.25558		39.1306	0.29381					45.373	0.30862					39.882	0.29965		37.0498	0.22858					32.1946	0.09127					31.6744	0.25108		35.1424	0.25049
														36.4718	0.27615		33.6974	0.29188					35.7782	0.32365					34.102	0.20258		41.327	0.31179					39.1884	0.30727					37.9746	0.36684		28.7844	0.23949
														35.4314	0.31309		36.1828	0.29063					35.8938	0.27518					39.015	0.31235		32.2524	0.20258					34.2754	0.32291					43.1188	0.35033		32.4836	0.21561
														42.4252	0.29151		37.57	0.25399					37.1654	0.24505					39.0728	0.28338		31.6166	0.26075					21.2704	0.23571					38.6104	0.30368		34.68	0.19133
														34.102	0.26702		39.2462	0.32802					45.1996	0.33379					42.483	0.30853		42.5986	0.28204					38.8416	0.31179					35.836	0.28055		31.9634	0.22141
														39.4196	0.33072		33.813	0.26721					37.7434	0.3138					43.1188	0.33045		28.4954	0.05975					32.7148	0.26219					35.0268	0.33471		37.1076	0.29788
														38.8416	0.28564		31.79	0.1318					33.0038	0.26715					39.882	0.30609		34.2754	0.29208					31.79	0.18682					33.8708	0.29181		33.1772	0.18048
														34.969	0.32269		36.125	0.21354					37.0498	0.32386					38.8416	0.32068		36.125	0.31002					36.8186	0.26551					36.7608	0.24587		32.7148	0.2604
														31.9634	0.19497		33.2928	0.15593					33.9286	0.30619					37.281	0.25519		36.9342	0.16461					43.4078	0.31198					34.7378	0.22471		37.9168	0.27778
														33.2928	0.30708		33.6974	0.21624					28.7844	0.09281					39.9398	0.29657		32.1946	0.23277					31.3276	0.21469					38.5526	0.33452		33.235	0.24628
														36.2406	0.2324		34.391	0.25683					36.3562	0.21476					39.0728	0.30195		38.3792	0.26836					37.859	0.32075					35.2002	0.27275		38.3214	0.29759
														37.57	0.29171		36.414	0.28767					40.8646	0.29954					42.194	0.32779		28.4376	0.22552					37.9168	0.27688					34.5066	0.21874		36.2406	0.25231
														34.5066	0.28591		38.3214	0.22009					33.7552	0.31042					36.4718	0.28141		37.9168	0.31106					39.7664	0.31652					44.1592	0.35963		39.304	0.30795
														44.6216	0.32277		35.0268	0.25828					37.3966	0.3015					36.9342	0.32945		30.4606	0.16301					34.969	0.18347					32.0212	0.17106		31.2698	0.17496
														33.3506	0.30367		34.0442	0.27537					33.235	0.22719					41.038	0.2789		35.4892	0.1609					39.304	0.2898					45.3152	0.34755		32.079	0.21415
														34.6222	0.30958		40.8646	0.29361					34.5066	0.27369					36.992	0.29817		37.7434	0.27884					30.2294	0.19954					42.3674	0.29376		38.0324	0.27674
														40.749	0.28649		36.8186	0.29454					46.2978	0.34225					44.4482	0.31058		35.4892	0.3274					39.5352	0.31456					32.5414	0.33316		37.7434	0.25005
														30.923	0.32786		34.0442	0.21427					36.3562	0.31856					32.946	0.23433		37.5122	0.24033					35.0268	0.26665					43.061	0.31018		35.547	0.26752
														35.3158	0.30561		35.6048	0.24697					42.3674	0.30823					41.038	0.32248		37.5122	0.24033					36.5874	0.29987					34.2176	0.35654		38.2058	0.23023
														33.2928	0.29958		45.4886	0.28475					34.391	0.28653					41.7316	0.28929		20.6924	0.143					21.3282	0.11312					37.4544	0.27937		32.2524	0.18762
														39.6508	0.30327		39.6508	0.30484					31.8478	0.15232					39.4196	0.30904		43.1188	0.18491					33.6974	0.1927					37.2232	0.29726		35.6048	0.25894
														33.6396	0.27367		43.8124	0.29104					40.8646	0.31343					37.9746	0.26637		37.2232	0.24144					35.7782	0.30847					41.616	0.31265		30.923	0.24317
														34.7956	0.29878		32.7148	0.09325					37.8012	0.26579					33.1772	0.28807		30.6918	0.16991					37.859	0.29076					36.9342	0.30357		33.0038	0.16582
														34.102	0.27945		36.5874	0.28036					38.3792	0.2933					40.0554	0.31742		36.703	0.27675					37.6278	0.26992					35.3158	0.26482		35.547	0.26829
														41.4426	0.34186		39.4196	0.3253					37.2232	0.34796					36.8764	0.3184		37.4544	0.16101					34.391	0.25419					29.9982	0.31368		38.148	0.30311
														37.57	0.3085		35.4892	0.1981					40.9224	0.32749					40.1132	0.28042		34.9112	0.13589					35.9516	0.2352					33.9864	0.24467		38.148	0.30311
														37.6856	0.31023		28.7844	0.07928					41.7894	0.12958					34.4488	0.2501		38.148	0.19012					36.8764	0.23583					47.0492	0.35546		30.7496	0.06117
														35.547	0.27902		33.524	0.15809					37.4544	0.29701					38.9572	0.28128		32.368	0.35015					30.4028	0.28453					33.9864	0.31076		44.1014	0.28406
														30.6918	0.23461		40.46	0.30999					29.5358	0.30385					37.8012	0.35094		34.0442	0.12684					31.3854	0.25858					37.57	0.34512		37.2232	0.29798
														38.6104	0.25778		40.9802	0.25028					52.02	0.29257					38.0324	0.21221		41.5582	0.10223					33.813	0.21866					41.0958	0.25809		30.7496	0.12098
														37.57	0.27088		36.5874	0.22659					36.6452	0.31756					36.6452	0.33157		33.8708	0.25199					39.4196	0.27587					45.084	0.33932		35.2002	0.29017
														40.9224	0.29697		36.8764	0.29305					39.0728	0.2984					37.3388	0.28842		25.8944	0.01749					36.2984	0.184					40.171	0.19739		35.2002	0.25301
														36.8186	0.27802		31.5588	0.27079					32.4258	0.23859					35.3158	0.28425		35.836	0.29985					35.3158	0.18802					28.3798	0.06344		40.749	0.31498
														38.7838	0.28994		32.1946	0.13524					33.9286	0.20266					32.7726	0.29266		32.7148	0.33045					40.4022	0.28637					41.038	0.34514		35.9516	0.2227
														37.9746	0.31873		28.7266	0.18303					35.1424	0.28204					33.3506	0.15305		32.8304	0.28146					41.6738	0.34511					41.038	0.31894		36.125	0.26934
														45.8932	0.31371		32.5992	0.22498					41.5582	0.30573					33.1772	0.25848		31.501	0.32802					34.8534	0.28599					29.5936	0.27575		32.946	0.22931
														35.836	0.28347		38.7838	0.28943					39.9398	0.31215					35.8938	0.29853		37.859	0.2922					33.8708	0.27361					37.3388	0.32537		35.4892	0.30614
														39.304	0.3304		39.7086	0.27168					38.2058	0.25859					41.6738	0.27122		43.8124	0.23269					34.68	0.18103					38.3792	0.32185		38.6104	0.25054
														32.5992	0.21149		35.2002	0.36778					38.6104	0.33357					39.4774	0.34354		42.7142	0.25931					36.4718	0.21868					33.9286	0.34139		31.9056	0.26425
														39.4774	0.28623		34.1598	0.30134					39.1884	0.29391					35.4314	0.32669		35.7782	0.19559					36.992	0.28514					37.1654	0.29637		35.1424	0.2218
														31.0964	0.29717		40.4022	0.32089					37.57	0.24122					38.0902	0.33276		31.7322	0.33089					30.923	0.10475					35.7204	0.27615		31.501	0.14142
														41.2692	0.30592		40.8068	0.22253					35.258	0.25445					40.9802	0.26373		32.5992	0.17261					32.1368	0.25213					41.5582	0.31135		36.9342	0.26166
														38.4948	0.28759		38.7838	0.3494					33.813	0.30424					43.2922	0.31528		33.6974	0.28882					37.3388	0.17754					32.7726	0.25608		36.5296	0.33
														36.2984	0.30345		36.8186	0.34388					31.9634	0.21622					30.4606	0.1659		31.6166	0.17537					39.5352	0.26295					44.8528	0.32417		35.6048	0.20083
														38.6682	0.29309		33.4084	0.23005					40.5756	0.33474					37.57	0.28291		38.8416	0.27703					34.4488	0.29279					36.2984	0.28694		30.2294	0.22818
														31.2698	0.18234		37.859	0.27865					39.7086	0.29919					39.3618	0.29146		41.1536	0.28319					39.9976	0.1709					43.9858	0.28088		36.0094	0.21276
														35.0846	0.22695		38.726	0.31217					38.9572	0.32596					42.5986	0.31215		33.6974	0.22707					37.1076	0.32434					33.6974	0.06276		35.8938	0.25954
														34.4488	0.31831		33.9286	0.26748					36.992	0.24602					35.0846	0.25471		33.1194	0.18764					41.2692	0.2491					32.2524	0.32186		33.0616	0.26435
														33.4662	0.24887		37.6856	0.31155					39.2462	0.23695					35.1424	0.29086		33.235	0.33408					35.4314	0.25328					36.414	0.28986		37.3388	0.22414
														41.5004	0.31569		36.2984	0.18384					32.0212	0.20279					38.0902	0.29917		34.1598	0.17392					33.4662	0.19211					36.0094	0.26503		40.749	0.31199
														37.1654	0.30571		37.281	0.26455					30.6918	0.32337					36.4718	0.2461		36.9342	0.20608					31.9634	0.35362					38.7838	0.32532		44.9684	0.27741
														34.969	0.31193		34.8534	0.25705					36.703	0.21654					26.4146	0.23231		34.4488	0.25342					36.0672	0.33219					36.8186	0.24711		37.7434	0.31257
														32.657	0.17182		24.4494	0.07326					39.3618	0.20119					35.2002	0.31947		35.6048	0.28529					39.5352	0.24716					37.6278	0.29726		37.2232	0.29985
														43.5812	0.28017		40.171	0.28463					38.9572	0.32297					39.882	0.29862		32.2524	0.29168					31.6166	0.16832					34.5066	0.24573		32.079	0.16483
														39.0728	0.38185		41.0958	0.27225					43.4078	0.30819					36.0094	0.3549		35.6626	0.21003					35.8938	0.28994					42.2518	0.302		45.6042	0.2814
														41.5582	0.29042		37.7434	0.23144					33.4084	0.30986					37.8012	0.25692		40.2288	0.28002					41.7316	0.32428					33.4662	0.2471		32.657	0.25152
														34.4488	0.22354		33.1194	0.25583					34.6222	0.31267					38.8416	0.3114		33.9864	0.27922					34.1598	0.25848					38.0324	0.27652		28.7844	0.29068
														41.7894	0.32087		32.8882	0.19141					35.1424	0.27136					42.8876	0.33054		30.6918	0.28997					37.859	0.20511					41.3848	0.28047		36.7608	0.29723
														33.6396	0.22591		33.5818	0.1286					35.8938	0.33646					39.593	0.34315		36.3562	0.309					40.0554	0.27764					43.639	0.34796		31.2698	0.22197
														43.1188	0.32907		37.6278	0.30415					34.5066	0.26876					38.7838	0.30849		40.46	0.29404					33.9286	0.25933					38.0324	0.30736		28.3798	0.21498
														38.9572	0.31494		36.6452	0.25505					40.6334	0.25553					34.7378	0.30323		35.4892	0.2215					42.3674	0.30331					42.5986	0.31404		31.3854	0.17258
														40.5178	0.27306		39.7086	0.31962					35.0268	0.28135					37.6278	0.32893		35.1424	0.29083					36.414	0.28067					35.0846	0.29606		33.9864	0.17855
														32.8882	0.23803		38.437	0.34405					40.0554	0.23348					34.2176	0.28065		32.079	0.29197					38.8416	0.2881					35.258	0.16687		33.4662	0.26707
														42.8298	0.30414		35.547	0.26133					39.593	0.31001					27.2816	0.04296		39.1306	0.2936					45.951	0.21976					36.125	0.22458		37.0498	0.33171
														36.1828	0.31264		35.3158	0.32131					39.304	0.19007					35.3736	0.25472		44.217	0.30335					38.7838	0.26871					45.3152	0.36644		39.8242	0.30709
														45.951	0.30023		35.547	0.22042					37.6856	0.30801					41.6738	0.35992		42.6564	0.30892					44.9684	0.3296					41.616	0.322		29.767	0.18833
														36.9342	0.33677		36.1828	0.31835					38.2636	0.18682					32.8304	0.21207		34.5066	0.23547					42.0206	0.29202					33.0038	0.24775		38.437	0.30888
														41.616	0.22475		29.3624	0.13621					36.8764	0.28151					33.6974	0.30597		33.1194	0.19571					43.5234	0.31732					40.4022	0.28913		34.3332	0.20905
														38.8994	0.27576		52.02	0.28252					35.7782	0.30456					30.4028	0.19763		37.7434	0.26771					35.0268	0.30561					46.0666	0.24928		32.8304	0.30826
														33.2928	0.24251		35.0268	0.29427					46.24	0.34473					38.6682	0.27968		38.0324	0.31751					48.1474	0.29848					41.8472	0.30272		34.7956	0.27623
														36.992	0.2104		36.0672	0.26819					40.5756	0.24938					38.437	0.3019		39.1306	0.27566					35.7204	0.19881					37.7434	0.29571		35.8938	0.15565
														36.992	0.2104		39.593	0.294					33.235	0.23067					38.0902	0.35599		40.0554	0.2412					34.5066	0.31643					44.1014	0.32018		40.5756	0.28924
														34.4488	0.33256		40.6912	0.19679					36.7608	0.25729					33.7552	0.24179		27.6862	0.24748					39.304	0.29567					37.6856	0.32391		40.2866	0.27535
														35.0846	0.27084		39.1306	0.30166					34.68	0.33216					33.7552	0.24635		36.3562	0.19138					30.345	0.11013					35.7204	0.2744		34.102	0.27019
														33.524	0.30218		33.524	0.2447					29.767	0.0489					28.611	0.28807		38.8994	0.11938					36.5874	0.17703					32.1946	0.19792		29.189	0.25002
														31.3276	0.26212		38.5526	0.22773					33.7552	0.2577					41.038	0.28414		42.2518	0.30356					42.0206	0.28838					32.7726	0.18242		39.2462	0.20789
														41.616	0.28506		27.5128	0.196					33.1194	0.31257					32.5992	0.28727		36.414	0.34067					31.212	0.24665					39.0728	0.28052		38.2636	0.29044
														38.4948	0.28856		37.57	0.03189					39.9398	0.30057					34.7956	0.30077		34.3332	0.19383					41.2114	0.31587					36.3562	0.30873		38.8994	0.2597
														33.3506	0.30706		31.5588	0.22991					39.015	0.32105					37.859	0.36631		37.8012	0.25562					40.3444	0.26227					35.547	0.35284		34.6222	0.16103
														41.1536	0.30955		40.1132	0.20101					36.992	0.28716					39.5352	0.29224		31.9056	0.252					35.836	0.32812					42.483	0.28196		32.7726	0.23277
														34.391	0.27663		38.3214	0.3146					36.7608	0.2603					35.1424	0.18627		38.3214	0.28729					36.703	0.20857					36.1828	0.22549		38.148	0.2813
														43.2344	0.31894		36.703	0.26911					40.6912	0.26666					36.9342	0.17965		35.4892	0.26358					40.6912	0.28898					45.5464	0.37972		34.5066	0.21765
														38.9572	0.30439		35.547	0.23917					37.859	0.27753					33.8708	0.25802		35.836	0.18357					37.859	0.18316					38.4948	0.31264		35.6048	0.24211
														39.1884	0.30009		41.1536	0.36889					36.8186	0.24385					35.836	0.33617		34.102	0.20175					30.7496	0.06525					38.726	0.30844		40.2866	0.16932
														38.3792	0.28164		29.5358	0.08148					37.8012	0.30287					40.4022	0.30197		37.9746	0.20952					38.2636	0.32172					38.6682	0.27859		38.2058	0.31238
														43.061	0.28137		42.3096	0.29647					40.6912	0.36739					41.2114	0.28554		25.3742	0.1344					54.9678	0.26245					35.3158	0.36921		36.0094	0.25508
														36.0672	0.30963		37.1076	0.18477					34.5066	0.10194					36.1828	0.25618		30.5184	0.27359					42.3674	0.3127					34.9112	0.33292		38.2058	0.23281
														41.3848	0.31229		37.9168	0.29859					34.102	0.22197					33.8708	0.28771		40.46	0.27411					43.8702	0.32521					42.6564	0.30412		35.6626	0.18674
														32.946	0.25802		38.148	0.25877					39.593	0.2702					36.2984	0.26322		34.9112	0.11621					39.1306	0.23065					36.414	0.25497		34.7378	0.2947
														35.6048	0.21269		35.7782	0.25633					46.9336	0.27705					41.3848	0.28018		34.2176	0.26116					36.3562	0.29166					39.593	0.29903		36.2984	0.19012
														39.3618	0.24684		36.414	0.24401					38.3792	0.28533					33.1772	0.19088		31.7322	0.25907					39.4196	0.11805					37.9746	0.28596		35.258	0.17522
														36.7608	0.32569		29.8826	0.19087					34.969	0.28275					41.3848	0.26642		32.1368	0.17625					27.2238	0.18825					36.8186	0.27628		38.726	0.27944
														40.9802	0.2867		45.662	0.31223					38.4948	0.22266					35.6626	0.28588		42.9454	0.33753					37.8012	0.24409					41.7894	0.31784		35.4314	0.22304
														37.281	0.3177		34.1598	0.25326					41.5004	0.30469					54.7944	0.33652		28.322	0.17347					37.5122	0.25047					42.6564	0.2673		38.2636	0.26114
														44.6216	0.24712		36.9342	0.20748					43.7546	0.34724					37.3388	0.26831		37.1654	0.31021					37.4544	0.32659					37.3388	0.31108		38.2636	0.26114
														34.4488	0.28038		39.882	0.33409					32.946	0.28166					33.1194	0.19615		34.7378	0.30953					37.281	0.24253					45.5464	0.20387		29.3046	0.15719
														34.7378	0.31718		40.171	0.31901					38.7838	0.31653					38.6682	0.32031		35.7204	0.19801					44.4482	0.3193					30.9808	0.2031		32.4258	0.15956
														40.9224	0.3066		31.5588	0.27355					38.148	0.3027					43.6968	0.3184		35.836	0.29684					22.6576	0.04949					37.5122	0.24886		39.6508	0.23857
														31.1542	0.17668		40.2288	0.30564					39.9398	0.28892					35.7204	0.23665		34.7378	0.24509					39.304	0.29783					39.1306	0.33222		31.501	0.2248
														40.9224	0.28921		39.593	0.2981					37.0498	0.26461					36.5296	0.30407		40.6334	0.24322					32.1368	0.23169					35.0268	0.23105		34.102	0.24242
														33.6396	0.29349		40.749	0.31356					33.6974	0.26119					35.547	0.29522		30.5184	0.18843					32.4836	0.2911					35.3736	0.32376		38.0902	0.34318
														29.3046	0.2509		37.9746	0.33037					42.483	0.25699					35.6048	0.28798		32.7148	0.27768					30.8652	0.28898					36.5296	0.32514		30.4606	0.20241
														36.0672	0.26583		33.7552	0.22021					36.2406	0.1568					33.4084	0.234		36.992	0.32327					37.7434	0.32442					35.3158	0.32456		35.9516	0.26886
														41.8472	0.33863		33.813	0.27835					41.5582	0.26872					33.6396	0.27056		39.1306	0.33942					34.102	0.28571					38.437	0.24283		47.7428	0.27731
														36.2984	0.24623		40.9224	0.27811					38.0324	0.28748					36.0672	0.27734		34.5644	0.25896					39.593	0.3026					36.0094	0.27822		32.8882	0.09076
														33.7552	0.23549		37.7434	0.26821					35.3736	0.21988					33.235	0.23312		31.8478	0.16247					33.4662	0.27753					40.8646	0.28775		38.4948	0.2953
														32.4258	0.19393		33.7552	0.25524					39.4196	0.31328					38.7838	0.31573		38.6104	0.29978					31.212	0.25514					32.7726	0.28604		33.8708	0.28142
														37.9746	0.09373		32.3102	0.32616					31.212	0.34283					44.3326	0.32077		39.9398	0.16941					36.5874	0.30425					39.5352	0.30587		37.3966	0.32369
														36.8764	0.19168		37.8012	0.25692					39.8242	0.27843					29.5358	0.29466		32.1368	0.25196					30.923	0.21002					36.8186	0.25611		27.455	0.22264
														35.836	0.28205		34.5644	0.23067					36.992	0.31256					36.8186	0.25711		36.703	0.23771					37.4544	0.26867					42.772	0.27221		35.3736	0.25486
														40.1132	0.3203		36.0672	0.26734					39.5352	0.30434					38.437	0.26703		37.3966	0.30434					37.3388	0.25206					44.3326	0.27163		33.813	0.20522
														42.0206	0.31168		35.0846	0.25711					33.7552	0.1901					42.0784	0.37952		35.7204	0.07634					41.2114	0.31812					44.3904	0.31831		31.7322	0.18991
														42.4252	0.26798		42.7142	0.30664					37.8012	0.25341					32.946	0.2167		50.1126	0.26029					31.3276	0.1281					33.6396	0.27893		33.5818	0.24457
														34.969	0.25248		36.9342	0.33793					39.5352	0.30634					37.3388	0.3047		31.1542	0.16501					27.8018	0.03809					38.5526	0.32255		34.7956	0.2473
														35.7204	0.26222		32.5414	0.21535					37.9168	0.24466					34.5066	0.31061		27.9174	0.24574					22.1374	0.07378					32.2524	0.23013		33.9864	0.26505
														33.0038	0.24079		39.9976	0.31594					32.1946	0.1814					36.5874	0.3428		32.7148	0.26746					40.9224	0.28728					35.6048	0.29459		38.0324	0.30851
														32.946	0.33377		37.3388	0.29013					40.2866	0.24449					36.9342	0.34828		36.0094	0.24991					30.8652	0.30667					39.4774	0.33101		34.2176	0.18558
														38.6682	0.30268		35.1424	0.22569					31.2698	0.15833					33.2928	0.22063		35.6626	0.26856					38.2058	0.29277					38.726	0.3225		29.3046	0.18308
														41.327	0.24849		39.7664	0.29597					35.8938	0.15178					35.8938	0.26227		30.6918	0.25634					44.1592	0.30054					38.8416	0.27484		42.5986	0.25632
														39.7086	0.30667		42.772	0.32301					30.1138	0.25561					37.5122	0.27704		50.0548	0.27098					35.836	0.1767					42.5408	0.32658		38.0902	0.31137
														41.4426	0.32963		32.0212	0.15532					35.4314	0.23158					37.3966	0.30113		30.634	0.27267					37.0498	0.31253					34.9112	0.29914		36.125	0.29512
														36.5874	0.33422		34.68	0.27678					29.3046	0.09785					40.46	0.31429		29.9404	0.30373					35.258	0.2729					35.2002	0.29054		33.9286	0.28371
														38.3792	0.29052		34.68	0.27678					39.9976	0.35666					30.345	0.26171		35.547	0.27689					39.1884	0.26754					45.7198	0.33563		39.1884	0.30187
														41.038	0.30716		33.3506	0.25169					33.7552	0.24369					39.9976	0.3066		35.7204	0.25986					50.8062	0.17867					38.2058	0.26997		41.5004	0.28852
														41.5004	0.3098		34.68	0.20499					37.8012	0.26691					42.0206	0.31209		38.437	0.322					39.9976	0.0397					35.1424	0.34966		33.1194	0.26637
														39.7664	0.34161		35.7204	0.33859					37.6278	0.34707					42.3674	0.31656		33.0038	0.18826					40.46	0.27901					38.3214	0.31245		27.455	0.15571
														36.0094	0.28842		32.368	0.20965					37.1076	0.3333					39.1306	0.27523		29.478	0.25555					30.6918	0.14723					38.0902	0.33527		31.9056	0.25548
														35.7204	0.27066		28.5532	0.27317					43.5812	0.31721					30.4028	0.26425		36.125	0.15922					34.8534	0.26543					38.8416	0.2838		30.5762	0.16727
														38.2636	0.27229		42.8298	0.30014					33.9286	0.35189					38.3214	0.24897		36.703	0.2276					33.1772	0.17896					36.8186	0.29973		35.3736	0.21409
														38.6104	0.26064		40.1132	0.30375					42.6564	0.35555					28.5532	0.18238		34.2754	0.29139					37.1654	0.29409					39.8242	0.31856		29.8826	0.33592
														42.0784	0.32409		32.0212	0.21479					41.0958	0.28912					37.859	0.30738		34.68	0.16315					38.9572	0.2975					41.9628	0.28857		30.2872	0.20557
														38.7838	0.32611		39.4774	0.33409					33.0616	0.22262					35.6048	0.3065		32.079	0.22533					35.6048	0.30027					33.1772	0.2789		31.3276	0.17226
														32.1946	0.18864		38.6104	0.29205					44.5638	0.30478					36.9342	0.3321		31.501	0.23347					37.4544	0.26541					38.9572	0.30819		32.5414	0.27832
														38.2058	0.25917		37.3966	0.23132					31.3276	0.20531					33.9864	0.30207		34.2176	0.22269					37.1076	0.28714					43.1188	0.29087		35.7204	0.19578
														38.4948	0.31407		30.5762	0.10169					33.524	0.29829					38.9572	0.30851		38.8416	0.31153					37.1076	0.28714					38.5526	0.28261		35.2002	0.24318
														32.4836	0.17306		35.8938	0.2812					39.304	0.26864					41.2692	0.32348		37.9746	0.30556					42.194	0.30457					37.57	0.31128		32.0212	0.23867
														43.7546	0.31339		37.1076	0.32318					37.1654	0.33047					30.4606	0.18666		41.4426	0.29991					38.6104	0.2275					38.9572	0.3327		33.0616	0.18801
														32.4836	0.25185		37.859	0.30697					35.6626	0.2715					35.0268	0.28016		32.4836	0.2043					39.9976	0.35089					36.703	0.30532		32.079	0.20607
														33.9286	0.29986		48.552	0.34911					35.6626	0.2715					36.2406	0.29014		38.726	0.2909					53.6384	0.21706					52.1934	0.29613		36.7608	0.27317
														34.7378	0.2665		37.3388	0.31094					32.079	0.20995					36.992	0.29196		35.8938	0.30188					31.501	0.19117					37.859	0.35287		27.5706	0.14199
														39.2462	0.24329		38.7838	0.30294					33.8708	0.25461					33.3506	0.29288		32.0212	0.13814					33.0616	0.24305					34.0442	0.25904		27.455	0.13317
														36.0672	0.27415		34.5066	0.10791					40.1132	0.32239					35.6048	0.31311		36.7608	0.18898					34.4488	0.24002					34.7956	0.22138		41.2114	0.29795
														51.9044	0.22129		33.9286	0.1828					32.7726	0.21497					39.9976	0.29531		33.6974	0.28577					32.5992	0.28293					41.4426	0.30064		30.8074	0.19773
														25.3742	0.20151		32.3102	0.21888					43.8702	0.26016					44.5638	0.31891		37.9746	0.1907					32.368	0.27916					37.3388	0.25134		37.4544	0.35131
														31.4432	0.24771		37.4544	0.30522					38.2636	0.29804					33.0616	0.3205		40.6334	0.27569					33.235	0.15535					41.1536	0.29274		34.68	0.16041
														33.8708	0.22101		38.2058	0.29142					33.8708	0.21669					38.4948	0.1504		38.8994	0.21707					31.501	0.25724					39.5352	0.28192		34.8534	0.15794
														35.6048	0.31443		33.5818	0.2241					36.992	0.21649					37.3388	0.30985		37.2232	0.05625					32.7148	0.20624					32.4836	0.29867		30.8074	0.21691
														31.79	0.31744		33.235	0.14381					40.8068	0.31132					38.2636	0.25438		34.7956	0.26783					38.0324	0.1746					32.4836	0.29867		33.8708	0.17054
														34.7956	0.23162		36.1828	0.342					36.7608	0.27293					39.1306	0.24394		35.6626	0.30716					35.6048	0.27315					36.5874	0.27403		38.6682	0.30588
														35.7782	0.25142		35.3736	0.23597					39.8242	0.34563					42.8298	0.3251		37.9746	0.32908					38.8994	0.28682					41.4426	0.29364		30.4028	0.20534
														46.3556	0.3212		33.235	0.18022					29.7092	0.20312					38.437	0.27774		30.5184	0.20882					36.2984	0.19406					49.5346	0.23767		31.212	0.23237
														34.4488	0.29507		30.8074	0.09073					43.928	0.30259					30.345	0.20176		41.9628	0.29462					36.2984	0.19406					32.7148	0.23015		39.1884	0.31153
														31.6744	0.30135		36.992	0.19659					40.6912	0.25412					32.368	0.28255		33.6974	0.21549					36.2984	0.19406					34.969	0.32154		28.2642	0.23868
														37.6278	0.32218		28.1486	0.13002					35.258	0.34892					35.7782	0.30978		32.1368	0.29569					35.8938	0.08113					44.217	0.3109		34.68	0.14944
														38.0902	0.22499		39.6508	0.30867					34.391	0.30561					34.7378	0.31091		38.148	0.22766					25.2586	0.05022					41.5582	0.31429		34.68	0.14944
														36.7608	0.30041		40.4022	0.24953					32.2524	0.30359					37.281	0.34071		39.8242	0.25061					40.46	0.31662					42.0206	0.3352		39.0728	0.29292
														38.6682	0.22105		37.3388	0.20768					34.0442	0.37865					30.7496	0.29736		40.749	0.29879					38.437	0.2568					32.1368	0.33677		27.5128	0.25228
														41.5004	0.35285		39.1884	0.28548					29.3624	0.19709					39.5352	0.2636		34.5066	0.30132					37.9168	0.34447					37.9746	0.31346		32.1368	0.19935
														42.772	0.29158		34.5644	0.24809					46.7602	0.30547					35.547	0.31351		35.8938	0.28666					37.1654	0.28198					42.1362	0.31947		40.9224	0.20548
														34.391	0.29023		37.5122	0.20625					42.2518	0.3178					39.015	0.29679		34.6222	0.23464					34.0442	0.25276					38.437	0.29746		37.1076	0.3274
														39.1306	0.36048		37.4544	0.2035					37.2232	0.26882					30.1716	0.25866		36.414	0.27304					39.882	0.29471					37.3966	0.29506		36.2406	0.16093
														43.5812	0.32216		36.6452	0.2871					32.0212	0.30981					44.7372	0.28304		41.2114	0.30916					53.8696	0.17406					35.836	0.25107		39.6508	0.22054
														44.1014	0.31704		40.8646	0.31773					33.2928	0.22403					34.5644	0.30555		32.946	0.2285					42.9454	0.3141					30.8074	0.24204		31.9056	0.25176
														47.1648	0.33559		41.6738	0.26479					35.0268	0.25632					33.813	0.29661		31.8478	0.24222					34.7956	0.29802					36.2984	0.26308		35.4314	0.34101
														42.3096	0.31105		41.8472	0.30694					51.0374	0.22524					44.2748	0.33562		35.1424	0.26778					36.0672	0.29096					38.2058	0.30681		33.3506	0.24891
														35.7782	0.17767		41.327	0.28568					38.726	0.34042					40.5178	0.30605		39.5352	0.29802					34.4488	0.2661					33.8708	0.3089		32.946	0.25408
														41.0958	0.28871		35.4314	0.15864					43.2344	0.3204					36.6452	0.28276		40.9224	0.3211					38.3792	0.25544					34.68	0.33007		38.2636	0.3118
														37.2232	0.28339		32.8882	0.30381					32.5992	0.27785					32.1946	0.27428		34.4488	0.3173					29.0156	0.18111					33.0038	0.30341		39.6508	0.34813
														29.478	0.24872		39.304	0.25238					39.1306	0.29363					39.015	0.29656		36.703	0.13877					39.6508	0.25187					41.8472	0.35281		34.7956	0.15604
														37.7434	0.26361		37.6856	0.21782					43.35	0.34449					34.8534	0.30295		31.2698	0.33735					38.7838	0.37199					30.056	0.27223		32.3102	0.19687
														30.7496	0.27147		43.5812	0.31751					35.3158	0.27018					35.6626	0.2587		33.1194	0.26062					34.68	0.27121					31.3854	0.28291		35.4892	0.27853
														42.5986	0.29886		29.0156	0.25115					38.3214	0.27631					42.4252	0.32403		34.391	0.23346					33.524	0.27161					37.8012	0.23801		36.0672	0.30052
														34.4488	0.25056		35.4314	0.14769					34.102	0.29064					52.0778	0.18125		34.391	0.14797					37.1654	0.15511					33.9864	0.34468		34.9112	0.29282
														36.414	0.24874		43.639	0.32257					33.7552	0.23209					29.5358	0.26343		36.8186	0.17419					35.3736	0.33373					50.4594	0.32017		39.7086	0.29599
														35.8938	0.22322		37.1654	0.21563					35.2002	0.27489					31.3276	0.29185		41.7316	0.29566					38.0324	0.27558					41.1536	0.3302		27.9752	0.04155
														36.414	0.33012		36.5874	0.22428					37.7434	0.29213					36.8186	0.27636		30.8074	0.23065					35.4314	0.19237					39.8242	0.3297		29.9982	0.25936
														37.859	0.3412		34.7378	0.24366					43.2922	0.31439					42.6564	0.32438		38.6104	0.23567					36.9342	0.29439					35.3158	0.29147		37.4544	0.28836
														37.57	0.31784		43.5234	0.29876					34.6222	0.25485					38.2058	0.27121		39.882	0.28191					39.7086	0.2471					41.038	0.29602		43.2922	0.34394
														35.6048	0.24441		31.1542	0.12475					33.9864	0.11517					42.0206	0.32515		37.3966	0.29726					35.836	0.25024					33.235	0.29989		35.547	0.22435
														33.7552	0.23067		38.8994	0.27705					34.5066	0.26816					29.8248	0.29543		45.1418	0.30035					38.6104	0.24014					42.0206	0.32553		37.281	0.28997
														40.2288	0.26181		38.0324	0.33236					41.1536	0.31841					36.703	0.19749		53.9274	0.30396					27.2238	0.10234					32.4836	0.27784		33.2928	0.27719
														32.946	0.23215		26.0678	0.16141					34.68	0.19711					37.7434	0.29815		37.859	0.33231					34.5066	0.23113					33.235	0.30212		48.6676	0.23858
														41.5582	0.28452		37.57	0.27217					38.3792	0.23411					33.1772	0.29295		37.9746	0.27862					36.703	0.33789					38.6104	0.30858		35.7204	0.21191
														34.2754	0.29923		33.8708	0.19258					43.928	0.31347					36.414	0.32091		39.1884	0.30137					38.6104	0.28746					41.5582	0.31828		36.5874	0.26868
														30.5184	0.16383		25.6632	0.03277					32.946	0.32249					39.3618	0.31806		37.3966	0.28008					29.0156	0.30414					29.767	0.16583		39.1884	0.2945
														37.9746	0.25396		32.3102	0.17643					38.9572	0.37241					32.7148	0.35737		43.5234	0.37719					35.8938	0.27807					45.951	0.33541		33.3506	0.1928
														32.4258	0.32955		36.1828	0.30802					32.657	0.2702					39.0728	0.31452		34.0442	0.23336					40.4022	0.23724					38.7838	0.35074		45.084	0.36843
														37.9746	0.29046		33.813	0.34168					33.5818	0.24422					33.3506	0.34304		37.3388	0.32447					37.0498	0.26122					39.5352	0.25015		35.6626	0.2698
														41.4426	0.26985		31.6166	0.15538					41.0958	0.32353					34.0442	0.21274		35.4892	0.32153					30.8074	0.24291					31.7322	0.27186		35.7782	0.2847
														41.6738	0.2942		40.171	0.30299					41.5004	0.31814					35.7204	0.29398		38.148	0.26457					35.258	0.18051					36.4718	0.18726		34.5644	0.10788
														35.9516	0.27805		38.7838	0.26874					28.6688	0.16352					39.7086	0.30344		36.414	0.27715					35.4314	0.29057					35.7204	0.3026		46.0666	0.30414
														30.7496	0.29116		35.6626	0.29397					28.5532	0.26364					40.46	0.34234		29.9982	0.17396					37.6278	0.20869					43.7546	0.33141		35.0846	0.29423
														38.4948	0.31845		35.7204	0.33002					36.2406	0.32187					33.3506	0.29472		33.0038	0.2298					32.079	0.24479					36.0672	0.23751		35.4892	0.32506
														37.8012	0.24965		33.0616	0.20246					44.9106	0.32323					33.5818	0.26746		36.703	0.28699					41.0958	0.29677					37.281	0.29176		36.2406	0.29708
														38.9572	0.33297		36.2406	0.23529					32.0212	0.25036					31.79	0.28836		37.2232	0.26803					44.6794	0.29649					39.2462	0.31862		38.7838	0.35965
														39.1884	0.32397		38.6104	0.12989					35.0268	0.24216					33.2928	0.21273		36.703	0.2008					35.2002	0.2934					35.258	0.2226		34.1598	0.28269
														44.7372	0.32551		35.7204	0.28511					40.9224	0.20895					34.6222	0.26102		34.5066	0.24096					30.8652	0.24981					36.703	0.1184		44.4482	0.32346
														36.5874	0.28466		34.1598	0.25079					35.0846	0.3133					43.4656	0.29219		30.056	0.24743					32.0212	0.23555					33.524	0.29737		43.5234	0.2795
														36.6452	0.25958		32.4836	0.18717					37.0498	0.32665					39.8242	0.30857		43.5234	0.25697					33.1772	0.17597					40.171	0.29596		38.4948	0.30639
														34.5066	0.21625		31.6166	0.27882					40.9224	0.31694					40.5756	0.30118		32.3102	0.25565					30.2872	0.27486					32.7148	0.33624		33.0038	0.18703
														39.1884	0.26915		39.6508	0.3122					42.483	0.28802					34.2176	0.1191		38.726	0.24665					34.5066	0.23942					32.5414	0.19661		35.4892	0.24901
														34.0442	0.29391		39.8242	0.27799					40.5178	0.30999					39.8242	0.23751		39.0728	0.28574					31.5588	0.27057					45.373	0.3344		32.2524	0.2871
														38.2058	0.31726		37.1076	0.29378					40.9802	0.31163					36.703	0.33089		36.125	0.27878					39.015	0.30598					31.1542	0.27788		43.35	0.29684
														38.7838	0.27416		34.1598	0.31873					36.5874	0.25792					42.5986	0.32731		36.992	0.15926					32.3102	0.14244					36.4718	0.29491		53.754	0.23667
														38.726	0.26048		38.4948	0.22476					35.9516	0.29008					36.6452	0.31073		31.5588	0.15514					36.2406	0.25374					32.657	0.35878		32.8882	0.22592
														34.4488	0.25498		31.0386	0.22972					36.5296	0.22815					39.1306	0.32632		37.8012	0.28861					39.015	0.31486					39.4774	0.35702		39.4774	0.32119
														37.1076	0.26224		37.6856	0.19016					36.5296	0.23039					38.0324	0.2763		32.8882	0.16044					34.7378	0.28233					39.4774	0.35702		39.1306	0.22717
														39.7086	0.20888		30.8652	0.23769					39.0728	0.29884					41.6738	0.32485		32.946	0.30474					34.7378	0.24712					42.483	0.27003		35.3158	0.26224
														37.1076	0.30607		36.2984	0.21619					40.8068	0.30741					35.6048	0.1928		32.8304	0.23607					35.8938	0.30828					35.4314	0.25752		38.726	0.30429
														31.6744	0.32592		25.432	0.0556					37.9168	0.30738					42.4252	0.34157		32.8882	0.23145					38.2636	0.24312					37.3388	0.31221		35.2002	0.07218
														33.524	0.23794		37.6278	0.27717					38.8994	0.28214					38.2058	0.29444		31.9634	0.24709					35.0268	0.2627					41.1536	0.28551		46.24	0.31062
														36.1828	0.30202		36.3562	0.18857					34.3332	0.29735					41.9628	0.31157		33.1772	0.21809					41.6738	0.114					31.79	0.27686		30.4606	0.34174
														43.4656	0.35126		39.8242	0.31541					34.6222	0.26141					35.0268	0.18354		38.3792	0.30481					38.437	0.30796					37.1076	0.3505		36.5296	0.23264
														34.6222	0.2776		32.8304	0.29308					39.2462	0.3115					37.4544	0.31306		38.2636	0.32432					33.0038	0.14069					39.304	0.3057		33.1772	0.32831
														38.6104	0.28616		38.9572	0.30098					42.7142	0.09171					40.749	0.29812		44.1014	0.26776					35.836	0.30122					37.859	0.29375		30.056	0.25893
														33.0038	0.30522		31.0386	0.20136					34.969	0.27535					37.1076	0.36572		36.8186	0.33205					37.57	0.23052					41.8472	0.32834		34.7378	0.1801
														38.2058	0.2548		32.8304	0.19286					38.3214	0.27322					32.0212	0.24676		38.4948	0.25681					35.0268	0.36223					42.8876	0.32249		34.3332	0.3127
														42.1362	0.32482		32.8304	0.19286					38.6104	0.32433					37.8012	0.25369		32.5414	0.30063					39.9398	0.23965					35.4314	0.34005		31.7322	0.26274
														36.5296	0.25848		39.7664	0.25237					41.038	0.24619					41.4426	0.30837		34.9112	0.33419					37.3966	0.25748					45.084	0.31673		37.0498	0.29038
														38.6104	0.30438		40.6334	0.1698					38.8416	0.31159					36.8186	0.31972		34.7378	0.29061					36.414	0.26382					44.9684	0.29805		39.7664	0.28146
														41.5004	0.32109		34.68	0.267					35.4892	0.28435					37.3388	0.25482		35.4314	0.22433					37.6856	0.28992					33.6396	0.29478		37.1654	0.30087
														32.1368	0.21674		39.9398	0.30661					37.2232	0.22423					33.9286	0.20077		36.703	0.31886					34.391	0.35267					40.0554	0.33637		29.9404	0.136
														33.0038	0.30027		39.4774	0.2872					35.547	0.24104					29.9982	0.19933		36.0672	0.16878					43.8702	0.3195					29.0734	0.10149		34.2754	0.30956
														38.0324	0.30557		36.4718	0.22323					42.3674	0.29811					34.5066	0.32817		37.1076	0.25167					38.8994	0.19358					33.1772	0.25736		39.9976	0.21013
														38.2636	0.27581		41.2114	0.27475					39.1306	0.23173					35.3158	0.27519		38.4948	0.27246					35.836	0.29904					42.483	0.33255		36.4718	0.27718
														37.6856	0.27775		30.4028	0.10451					41.6738	0.29228					35.0268	0.33965		38.6682	0.28558					33.1772	0.26465					32.946	0.31764		32.8882	0.23513
														37.5122	0.3007		39.1884	0.30992					39.9976	0.32554					41.038	0.24461		34.7956	0.27905					34.102	0.17982					40.171	0.31515		30.6918	0.22902
														34.68	0.2744		38.0324	0.28901					41.9628	0.31928					33.1194	0.31676		37.2232	0.31522					37.1076	0.29339					38.3792	0.21751		33.1194	0.18171
														34.7956	0.31376		33.9286	0.21162					39.8242	0.29164					33.5818	0.25055		38.437	0.28053					28.1486	0.22004					43.0032	0.33207		31.5588	0.1613
														33.7552	0.24643		37.6278	0.27992					42.483	0.28447					35.258	0.29865		36.3562	0.29622					33.9864	0.24252					41.7316	0.27145		35.258	0.20409
														38.8994	0.30333		32.368	0.20114					37.8012	0.32723					38.7838	0.25031		32.657	0.23307					34.9112	0.20805					42.3096	0.32793		32.8882	0.2277
														35.7204	0.29536		34.5644	0.29355					35.7782	0.29953					35.4892	0.34752		40.9802	0.23948					30.2294	0.20503					37.9746	0.315		33.1194	0.29343
														37.9168	0.31		33.235	0.2482					38.8416	0.30875					40.9802	0.28676		41.038	0.27277					40.6912	0.2725					38.9572	0.3323		43.35	0.28285
														41.6738	0.29532		39.2462	0.30106					39.9398	0.31526					38.2058	0.31141		32.5992	0.12692					32.4836	0.23319					38.4948	0.28328		39.6508	0.30915
														35.4314	0.30675		51.7888	0.18219					36.0094	0.27653					46.24	0.32298		30.4606	0.24672					33.9864	0.27986					35.2002	0.29931		32.8304	0.29169
														40.2288	0.2784		36.414	0.31963					39.2462	0.29947					34.7378	0.30248		29.3046	0.17013					30.7496	0.14706					42.772	0.33533		36.0672	0.27889
														31.3854	0.25724		35.9516	0.23544					36.703	0.31929					38.4948	0.31357		35.0846	0.30234					37.7434	0.22307					39.4774	0.2663		40.5756	0.3024
														40.0554	0.32105		39.1884	0.2483					38.8994	0.35831					42.8876	0.34229		35.4892	0.19319					35.4314	0.29533					38.148	0.32193		31.2698	0.14621
														36.5874	0.29326		33.235	0.22199					27.0504	0.23199					29.8826	0.17243		39.593	0.15822					29.3046	0.22914					43.061	0.3465		32.4836	0.18081
														36.5874	0.28897		38.6682	0.23265					32.2524	0.23629					35.0268	0.30472		37.57	0.29522					42.6564	0.28104					33.524	0.24649		37.1076	0.30352
														43.4078	0.31875		33.9864	0.26013					34.8534	0.20715					39.1306	0.32335		36.5874	0.16969					53.2916	0.27787					36.8764	0.31852		37.2232	0.29341
														34.7378	0.22448		39.9398	0.2947					33.0616	0.24105					40.2288	0.26064		41.7316	0.32431					47.2804	0.27311					43.35	0.31725		34.0442	0.20977
														36.6452	0.31296		34.391	0.18206					36.4718	0.28698					32.7148	0.35029		28.9	0.18759					41.1536	0.2678					37.3966	0.37761		35.7782	0.31889
														28.033	0.29806		32.1946	0.27308					39.7664	0.26437					38.8416	0.29038		34.5066	0.30173					40.1132	0.28291					37.6278	0.28274		37.5122	0.29314
														37.6856	0.29452		38.2058	0.28967					37.4544	0.30054					41.7316	0.31531		34.9112	0.25501					38.8994	0.30802					39.1306	0.31577		30.7496	0.19796
														35.0268	0.28666		29.9982	0.16969					43.1188	0.30366					33.7552	0.35036		36.8764	0.28727					35.6048	0.29358					27.2816	0.12522		42.1362	0.29266
														45.951	0.31508		40.8068	0.26195					31.2698	0.30302					39.6508	0.25492		33.9286	0.25796					34.6222	0.26008					41.4426	0.29696		41.1536	0.32802
														33.5818	0.24229		34.8534	0.27666					38.0902	0.34948					39.6508	0.32138		36.125	0.3074					39.7086	0.30424					35.4892	0.31398		30.2294	0.18732
														40.6912	0.30307		50.4594	0.3162					39.1884	0.32314					33.5818	0.25255		36.8764	0.22099					36.4718	0.32054					37.8012	0.30113		33.2928	0.17976
														36.7608	0.32036		39.4196	0.27463					39.593	0.3195					39.0728	0.33244		44.0436	0.28211					31.501	0.18398					49.8814	0.27359		32.4258	0.19728
														28.4954	0.28621		38.9572	0.28779					36.3562	0.21399					32.0212	0.2261		37.3388	0.25695					32.5992	0.28342					33.0616	0.2643		29.4202	0.14189
														34.7956	0.2058		34.5066	0.35391					39.4774	0.28496					39.1884	0.31143		37.2232	0.31414					36.4718	0.28121					37.57	0.16923		34.5066	0.13965
														37.0498	0.30094		36.703	0.26983					37.6278	0.32563					40.749	0.30925		32.5992	0.28728					36.0672	0.28739					37.6278	0.33469		31.0964	0.24663
														38.6104	0.22402		36.703	0.26983					43.9858	0.23649					33.9864	0.19699		33.235	0.35004					35.836	0.22614					41.2114	0.34404		28.2642	0.06191
														36.7608	0.31593		34.391	0.23439					38.6682	0.30183					29.6514	0.31914		37.1654	0.28498					34.5066	0.23875					40.8068	0.34836		35.9516	0.18604
														38.3214	0.2882		41.2114	0.28856					35.3158	0.294					36.4718	0.27974		29.9982	0.24884					40.3444	0.27576					41.9628	0.34801		35.2002	0.2298
														31.3276	0.33063		38.4948	0.29316					38.3792	0.28739					36.8764	0.28346		32.7148	0.29505					34.3332	0.22441					32.0212	0.28822		21.3282	0.02096
														40.46	0.32472		31.7322	0.21481					43.061	0.3353					42.4252	0.30166		35.6048	0.31059					45.0262	0.31536					39.304	0.32284		33.6396	0.20711
														41.8472	0.33548		36.1828	0.29287					37.1076	0.37425					39.304	0.31402		33.9864	0.32295					32.3102	0.27755					35.0846	0.30064		43.5812	0.30827
														35.1424	0.31382		37.2232	0.24541					37.9746	0.28495					38.148	0.28073		28.611	0.24539					38.2636	0.19913					31.4432	0.16082		41.616	0.29886
														47.3382	0.29899		41.5004	0.29667					30.5762	0.14957					35.0846	0.32531		34.6222	0.17226					29.8826	0.20028					43.061	0.2767		34.391	0.31155
														33.2928	0.25735		33.2928	0.26543					41.7894	0.31921					32.0212	0.19816		32.079	0.25134					43.7546	0.29405					38.9572	0.30785		27.8018	0.16113
														36.703	0.29515		35.0846	0.2728					37.6856	0.28443					46.7024	0.33382		31.8478	0.31703					32.946	0.28067					37.57	0.27949		30.056	0.20025
														32.2524	0.28924		28.2642	0.20022					35.7204	0.23649					43.061	0.30865		38.9572	0.26447					34.68	0.26435					35.258	0.27361		37.4544	0.28951
														36.414	0.31901		43.2922	0.30257					35.2002	0.35313					39.304	0.31466		38.3214	0.271					39.304	0.34737					27.8596	0.22259		35.9516	0.21651
														38.437	0.27182		32.368	0.19512					37.3966	0.33128					33.6974	0.28884		25.8944	0.02183					32.8304	0.29253					37.2232	0.28477		34.9112	0.30463
														40.5756	0.27381		43.2344	0.31372					40.2866	0.32427					35.7204	0.33707		40.9802	0.17655					37.6856	0.26707					44.1014	0.33361		37.9168	0.29122
														37.4544	0.26362		45.4308	0.3103					36.8764	0.28203					33.4084	0.29003		37.5122	0.18028					31.3276	0.22869					33.4084	0.26599		41.2692	0.33052
														31.7322	0.23511		37.5122	0.32134					35.4314	0.15158					33.813	0.23944		41.038	0.29174					38.2058	0.27974					45.7776	0.3364		37.9168	0.19036
														38.0324	0.28659		37.5122	0.3429					34.4488	0.16503					34.8534	0.30067		33.235	0.23793					38.5526	0.30166					38.6682	0.32525		34.391	0.31417
														37.8012	0.32301		34.2754	0.2596					43.1766	0.34643					37.3966	0.30082		32.4836	0.18725					36.8186	0.16935					36.4718	0.30986		38.726	0.31775
														30.345	0.25441		37.6278	0.28487					33.8708	0.30764					40.5756	0.30771		40.749	0.27974					39.4196	0.29964					41.4426	0.35559		33.1772	0.26392
														38.8994	0.27389		38.3214	0.24976					36.992	0.2979					34.9112	0.23594		32.2524	0.18737					35.7782	0.29014					42.9454	0.32198		40.2866	0.06815
														33.813	0.28655		35.0846	0.2396					44.795	0.33041					36.7608	0.31364		40.0554	0.30956					28.7266	0.28924					31.3276	0.27565		39.7086	0.29922
														35.1424	0.24679		37.9746	0.19237					37.0498	0.35299					43.061	0.33377		39.304	0.2528					33.524	0.30228					36.5296	0.27254		28.9578	0.17972
														35.8938	0.23663		37.6278	0.33503					42.772	0.33409					40.171	0.34407		26.5302	0.19444					41.9628	0.31846					36.125	0.29855		40.4022	0.29438
														32.079	0.25015		33.9864	0.17624					35.7204	0.27374					35.0268	0.20725		39.9398	0.31608					29.8248	0.1554					42.0206	0.29342		38.0324	0.33382
														40.46	0.3113		29.6514	0.07348					32.946	0.22291					39.304	0.33165		33.1772	0.22627					37.2232	0.28715					34.102	0.33486		37.57	0.19431
														32.657	0.21549		36.4718	0.1802					42.1362	0.28206					37.5122	0.30648		33.5818	0.20428					36.1828	0.24941					41.616	0.30412		37.7434	0.21158
														37.1076	0.31419		31.1542	0.30317					39.6508	0.29492					38.2058	0.28041		34.5644	0.25556					44.4482	0.24052					37.0498	0.32874		32.0212	0.20484
														31.2698	0.27805		41.9628	0.32853					38.4948	0.32926					37.57	0.30078		38.3792	0.35703					40.2288	0.25002					39.4774	0.26876		36.6452	0.27454
														38.8994	0.2924		32.657	0.33576					37.2232	0.29119					34.7956	0.24469		27.9174	0.0542					32.946	0.28193					32.079	0.2853		45.6042	0.32621
														43.7546	0.3311		32.1946	0.13171					32.657	0.19366					36.125	0.3142		37.7434	0.31124					32.946	0.28193					38.8416	0.3376		43.061	0.30275
														37.4544	0.32997		35.547	0.16166					41.616	0.29336					30.1138	0.26192		36.8186	0.17259					41.2692	0.28003					37.0498	0.29988		35.9516	0.29907
														42.8876	0.29961		38.8416	0.27468					35.4892	0.27156					36.1828	0.24006		35.6626	0.20187					36.992	0.29267					38.6104	0.31555		41.7316	0.297
														32.5992	0.31452		42.5986	0.29907					38.4948	0.32358					33.2928	0.3217		33.9864	0.29683					37.2232	0.18039					41.4426	0.30994		32.1946	0.17245
														34.5644	0.32421		34.0442	0.1931					39.593	0.26862					37.9168	0.30674		37.1076	0.26331					32.4258	0.1279					31.0964	0.19092		42.1362	0.27772
														35.2002	0.16129		27.9174	0.18645					36.4718	0.25224					34.8534	0.30218		39.593	0.28779					37.7434	0.30507					36.125	0.33415		34.7378	0.28738
														35.836	0.32804		42.8298	0.29386					39.4196	0.28717					37.8012	0.29779		39.9976	0.09523					40.6334	0.2853					40.749	0.31704		36.703	0.15629
														32.4258	0.17181		38.2636	0.28286					33.0038	0.21626					35.0268	0.23115		39.4774	0.23018					29.4202	0.16865					38.726	0.31388		40.46	0.2066
														33.6396	0.26191		40.0554	0.31279					45.2574	0.34814					34.2176	0.25999		28.7266	0.1486					36.9342	0.17034					33.8708	0.32409		31.4432	0.1288
														38.437	0.33796		33.6974	0.19522					31.0964	0.34708					35.1424	0.22072		34.8534	0.26733					36.2984	0.1758					40.0554	0.29486		34.7956	0.31266
														33.9864	0.30113		34.969	0.18687					37.8012	0.26788					38.8994	0.29892		33.9286	0.23853					28.1486	0.13888					38.7838	0.35575		33.7552	0.24233
														32.079	0.24978		40.46	0.35377					31.6166	0.2587					39.7086	0.25583		37.859	0.29534					35.7204	0.31162					38.3214	0.31583		40.9224	0.28156
														33.0038	0.25295		39.0728	0.27083					33.9864	0.19196					39.7086	0.25583		39.4774	0.28258					26.9348	0.10137					34.9112	0.28433		41.8472	0.29345
														37.3388	0.31488		41.3848	0.32033					40.5756	0.32345					37.0498	0.31019		35.547	0.25158					38.9572	0.23434					35.6048	0.28804		33.0616	0.24182
														40.9802	0.30066		32.4836	0.00936					39.9398	0.27983					38.8416	0.34504		33.524	0.25987					38.5526	0.27738					37.5122	0.29385		38.6104	0.31767
														35.2002	0.25793		40.1132	0.2267					36.5296	0.219					35.9516	0.26854		34.969	0.25164					31.0964	0.1646					37.57	0.16209		32.368	0.184
														35.2002	0.28575		30.1716	0.15847					27.0504	0.16039					39.593	0.31435		35.836	0.25482					38.0902	0.20876					37.9746	0.30755		29.5358	0.23262
														32.4258	0.27524		29.189	0.13993					35.6626	0.17513					34.2754	0.2865		37.7434	0.19291					34.391	0.22297					35.6626	0.33824		33.9864	0.30162
														41.9628	0.33742		36.9342	0.29					34.9112	0.2944					42.0784	0.32619		35.1424	0.30623					41.9628	0.31382					31.9056	0.28387		32.1368	0.33345
														39.4774	0.32768		33.235	0.1646					39.593	0.31564					31.8478	0.19511		33.524	0.16846					34.3332	0.22928					44.9684	0.32298		34.391	0.17195
														41.7894	0.32616		42.7142	0.29352					31.5588	0.22031					38.3792	0.29714		39.1306	0.27617					38.4948	0.29346					43.5234	0.33206		39.0728	0.31469
														38.437	0.29733		35.8938	0.21995					36.5296	0.28921					34.68	0.32182		38.3792	0.28858					34.7378	0.2929					36.5296	0.26902		39.1884	0.26049
														33.6974	0.29885		34.8534	0.23383					38.8416	0.32821					30.056	0.2155		32.4258	0.18818					39.5352	0.32849					40.0554	0.33467		38.7838	0.2581
														33.6974	0.31672		39.304	0.33937					34.3332	0.23346					40.2288	0.2956		37.3388	0.22736					33.4662	0.2539					43.5812	0.31293		38.8416	0.25501
														34.102	0.26781		33.6396	0.16563					37.6856	0.28781					36.414	0.30973		29.3624	0.27019					33.4084	0.22827					32.657	0.34158		43.35	0.27241
														32.8304	0.2201		40.4022	0.19782					38.7838	0.28226					41.038	0.30792		32.4258	0.15911					34.7378	0.27811					45.2574	0.34253		29.8826	0.07167
														33.8708	0.26658		37.2232	0.18099					36.414	0.17136					38.0324	0.32735		38.8416	0.28881					37.859	0.24341					45.2574	0.33413		37.3388	0.29779
														34.4488	0.29729		30.6918	0.2282					34.5066	0.3101					35.2002	0.2161		36.0672	0.19079					37.4544	0.29672					33.9864	0.30945		35.547	0.31009
														39.7664	0.33005		31.6744	0.19849					40.1132	0.2999					38.2636	0.29703		35.6048	0.30026					32.946	0.19471					33.6396	0.24616		37.3388	0.23938
														32.657	0.31081		39.7664	0.20464					39.2462	0.30019					40.4022	0.26171		35.8938	0.18947					36.7608	0.16093					33.9286	0.25595		34.4488	0.23439
														33.8708	0.27722		32.368	0.27617					38.9572	0.24407					40.3444	0.32503		38.8994	0.28978					32.7148	0.27888					36.2406	0.31941		33.8708	0.19993
														33.524	0.31692		30.923	0.23378					42.1362	0.32021					36.8186	0.2963		33.235	0.21813					36.4718	0.33148					43.7546	0.34598		37.0498	0.18536
														43.639	0.31897		38.6104	0.33074					36.5874	0.24913					37.9168	0.28421		38.7838	0.09472					41.327	0.31433					36.3562	0.31427		38.437	0.29152
														30.8652	0.26266		39.4196	0.27093					41.616	0.37386					32.8882	0.30623		34.2754	0.35128					37.2232	0.29301					45.373	0.33999		30.9808	0.23336
														29.9982	0.21899		43.1188	0.35201					40.1132	0.33543					38.0902	0.25002		32.5992	0.22605					36.0094	0.20983					42.3674	0.29509		39.3618	0.26948
														38.2058	0.25374		34.68	0.28804					40.0554	0.19118					37.9746	0.26737		37.6856	0.28067					27.0504	0.19581					34.391	0.30057		33.7552	0.21442
														43.928	0.32186		37.1654	0.30724					36.703	0.35921					38.148	0.30562		36.1828	0.28207					41.5004	0.36429					37.1076	0.27124		36.5296	0.29206
														32.8304	0.28606		40.3444	0.27005					34.5644	0.16726					33.0038	0.35059		36.3562	0.31934					37.4544	0.22451					46.1822	0.30279		37.0498	0.29404
														37.57	0.37116		35.3158	0.25543					41.8472	0.32881					35.7204	0.31503		40.749	0.33403					35.2002	0.23251					36.125	0.26419		42.0206	0.33589
														28.3798	0.18235		37.9746	0.31196					30.7496	0.30843					34.102	0.18893		37.3388	0.29072					40.5756	0.28535					32.1946	0.26224		35.6626	0.29206
														42.1362	0.32495		33.8708	0.26505					35.8938	0.26534					32.5414	0.26779		33.0616	0.2718					49.6502	0.2842					33.1194	0.18293		36.3562	0.2522
														44.9684	0.33879		38.0902	0.20219					45.8354	0.26927					33.3506	0.29604		32.3102	0.30288					39.2462	0.23824					36.8764	0.33746		32.8882	0.29643
														29.189	0.23594		33.6974	0.27145					43.1766	0.31492					37.1076	0.3078		34.6222	0.27887					34.9112	0.28524					33.9864	0.24515		31.9056	0.171
														34.5066	0.27475		37.281	0.22466					42.8298	0.28523					30.2872	0.26751		36.0094	0.29003					39.8242	0.31971					38.148	0.33422		31.6744	0.23313
														32.4258	0.25398		32.3102	0.25127					41.5004	0.3293					41.2114	0.33494		34.4488	0.31643					38.5526	0.29499					37.281	0.31992		32.8882	0.1259
														35.2002	0.34729		36.4718	0.27905					40.9224	0.30901					32.2524	0.16423		32.0212	0.25676					38.3214	0.25899					38.3214	0.2906		34.7378	0.2547
														34.5644	0.20372		36.8186	0.30365					35.0846	0.26885					37.8012	0.30585		37.3966	0.32958					30.4028	0.19697					43.4656	0.31901		29.0734	0.24056
														42.6564	0.27563		36.5874	0.33236					39.015	0.28459					31.3276	0.25072		32.946	0.25919					38.9572	0.30156					40.2866	0.35292		37.57	0.28057
														36.0094	0.27505		33.9286	0.16304					37.4544	0.16391					41.905	0.34033		35.6048	0.30612					30.6918	0.03978					37.3966	0.3002		43.5812	0.29954
														41.038	0.27107		40.8646	0.21124					40.4022	0.27718					44.795	0.33637		34.68	0.31898					39.015	0.29666					44.795	0.36201		36.703	0.29071
														33.813	0.28598		34.969	0.2906					35.9516	0.26554					35.6626	0.28174		36.7608	0.05798					34.969	0.2928					36.6452	0.29264		36.703	0.29071
														38.9572	0.29869		39.9976	0.26666					42.8298	0.30084					37.5122	0.27799		35.4314	0.30819					35.2002	0.31948					42.1362	0.33226		36.5874	0.02914
														35.6048	0.27818		38.437	0.31439					41.2114	0.35511					37.1076	0.29876		29.478	0.16736					38.726	0.33165					46.4134	0.32257		37.281	0.29711
														40.171	0.28353		43.1766	0.31939					37.2232	0.33972					39.593	0.29612		38.0902	0.19267					33.1772	0.33341					41.2114	0.32901		37.281	0.31421
														40.3444	0.34537		36.992	0.33178					29.189	0.08166					41.905	0.34032		38.2058	0.30928					39.1884	0.29371					38.437	0.2611		37.3388	0.17607
														43.7546	0.32454		37.281	0.29127					39.0728	0.30017					39.6508	0.22217		45.6042	0.2468					34.2176	0.25231					33.9286	0.26936		37.3388	0.20574
														39.7086	0.32689		34.68	0.18528					37.281	0.27551					36.1828	0.30219		32.5992	0.32257					32.657	0.27346					41.6738	0.29134		35.258	0.24957
														39.2462	0.23139		36.1828	0.20128					42.8298	0.30533					31.9056	0.2011		30.634	0.17044					34.9112	0.27155					40.9224	0.30533		33.4084	0.2935
														36.414	0.28679		43.061	0.30806					41.9628	0.29845					34.391	0.30325		27.5706	0.00998					38.0324	0.26959					37.0498	0.31094		35.0846	0.22478
														36.0094	0.36341		33.0038	0.25857					37.9168	0.33322					36.3562	0.17936		30.2872	0.26071					34.8534	0.18547					37.1076	0.32236		31.79	0.24123
														35.6626	0.33136		39.1884	0.30925					34.3332	0.25192					40.5178	0.34269		31.501	0.33483					34.68	0.15747					33.9864	0.32346		42.194	0.28457
														35.8938	0.32963		37.9168	0.28649					40.8068	0.32409					33.9864	0.21831		35.7204	0.26482					30.4606	0.11506					28.4954	0.24069		35.547	0.20669
														37.3388	0.26731		37.6856	0.28864					34.0442	0.24416					25.721	0.04859		36.2984	0.22886					37.1076	0.2844					40.3444	0.23463		28.0908	0.19056
														33.0038	0.32014		40.46	0.28695					36.125	0.3296					38.726	0.32965		31.0386	0.24329					34.8534	0.19918					39.882	0.31163		41.6738	0.2909
														36.8186	0.2978		45.4308	0.21404					38.8994	0.24909					35.3736	0.30495		36.8764	0.26816					41.2692	0.30035					41.0958	0.31972		35.6626	0.2709
														38.6104	0.2376		32.4258	0.30803					42.0206	0.23237					29.2468	0.24664		35.4314	0.33487					34.68	0.27072					38.6104	0.25856		36.703	0.30295
														35.4314	0.23858		33.7552	0.29789					40.1132	0.32057					48.8988	0.24545		36.7608	0.31517					37.6856	0.29536					36.9342	0.21484		33.6396	0.26654
														41.2692	0.31067		36.8764	0.29919					37.0498	0.27955					42.0784	0.30189		35.6048	0.24037					34.5644	0.22161					35.4892	0.2231		31.5588	0.18564
														36.125	0.21199		37.57	0.28342					34.68	0.2998					34.6222	0.17575		37.1654	0.16191					34.6222	0.30314					34.3332	0.37644		36.2406	0.21715
														36.9342	0.28743		35.6626	0.23431					32.5992	0.16584					34.4488	0.31636		37.6856	0.21036					39.9976	0.35205					39.304	0.31662		28.7844	0.1939
														38.4948	0.2864		37.8012	0.26712					36.0094	0.27484					35.3736	0.32447		33.235	0.10827					33.4662	0.18845					36.5296	0.30679		34.2754	0.25913
														37.9168	0.30251		37.1076	0.29518					39.5352	0.29271					41.0958	0.30942		31.4432	0.26079					30.7496	0.17153					36.5296	0.30679		40.2288	0.27901
														45.951	0.3034		33.6974	0.30663					40.9224	0.33924					37.3966	0.30091		39.7086	0.30061					34.2754	0.28484					43.1766	0.2663		32.8882	0.22259
														41.5582	0.29796		29.0734	0.12017					36.992	0.21404					44.1592	0.29996		26.588	0.22481					32.4258	0.28433					36.2984	0.28857		41.327	0.31529
														42.2518	0.30448		38.3214	0.29962					41.4426	0.32878					32.8882	0.24348		40.8068	0.37704					41.8472	0.28675					36.7608	0.28794		34.7378	0.20596
														36.414	0.15141		38.2058	0.25268					22.0796	0.23178					38.8416	0.29077		39.8242	0.30808					39.0728	0.28909					33.1772	0.06975		34.3332	0.30737
														33.9286	0.26426		34.4488	0.261					41.2114	0.31018					35.8938	0.26424		44.7372	0.2971					39.1306	0.32251					39.9398	0.31274		44.9106	0.33748
														39.882	0.29566		37.3388	0.30718					38.9572	0.29775					33.4662	0.29123		41.6738	0.16045					40.8646	0.2653					34.969	0.28099		34.5066	0.32312
														34.5066	0.25603		37.3388	0.30718					38.8416	0.3123					35.7204	0.2318		30.7496	0.22843					34.2176	0.28462					37.1654	0.27719		34.7956	0.20482
														36.414	0.30977		37.0498	0.25898					33.7552	0.2023					34.2754	0.26583		27.8596	0.18426					36.5874	0.24618					36.8186	0.31276		26.01	0.228
														35.836	0.31296		32.7148	0.21782					36.9342	0.33815					38.0902	0.32733		35.9516	0.29915					34.7378	0.28109					39.882	0.35083		35.6626	0.25758
														34.4488	0.19018		39.1884	0.33554					42.5986	0.31861					43.4656	0.28789		37.4544	0.2802					42.0784	0.29612					42.7142	0.35566		35.258	0.32035
														40.2288	0.31238		38.2058	0.19575					40.171	0.30077					33.1194	0.26157		34.9112	0.15373					39.304	0.33357					32.8882	0.26428		45.2574	0.30645
														35.0846	0.26094		36.0094	0.24705					36.992	0.285					37.3966	0.32109		30.1138	0.18452					42.6564	0.30007					41.7316	0.32303		25.6632	0.15607
														40.46	0.2974		38.8994	0.30716					37.1654	0.23223					38.9572	0.24501		32.368	0.13991					39.1306	0.336					33.4662	0.29093		33.813	0.14004
														35.7782	0.2798		36.0094	0.29777					32.7148	0.28257					40.3444	0.3539		26.6458	0.12729					40.2866	0.26901					39.304	0.29464		38.6104	0.25015
														38.3214	0.31309		33.1194	0.30126					41.1536	0.25518					38.8994	0.3498		37.5122	0.25278					40.171	0.31352					32.657	0.18375		25.8366	0.11991
														32.0212	0.20626		28.8422	0.24427					32.1368	0.24073					37.6278	0.28616		38.8416	0.32129					39.1884	0.25581					40.8068	0.32842		31.4432	0.15826
														32.4836	0.31196		35.547	0.2697					38.148	0.28032					43.061	0.31676		29.2468	0.14593					36.703	0.27855					36.8764	0.34622		37.1654	0.20091
														35.2002	0.28783		36.1828	0.19787					37.1654	0.27281					43.7546	0.29529		31.4432	0.19445					34.5066	0.27478					39.5352	0.38318		44.1014	0.32102
														29.5358	0.17969		32.7726	0.25328					35.836	0.27421					33.5818	0.32008		34.9112	0.30678					26.877	0.22624					36.703	0.29218		40.8646	0.3098
														34.5644	0.2968		35.4892	0.2786					40.6912	0.33561					36.414	0.33053		31.212	0.17943					39.015	0.28166					37.8012	0.30727		40.1132	0.28124
														34.102	0.31786		38.7838	0.32981					37.2232	0.28488					36.5296	0.22674		34.0442	0.29103					38.6104	0.21448					36.8186	0.28677		35.3158	0.22948
														37.6856	0.29388		33.7552	0.25242					39.9398	0.30422					38.2636	0.25641		36.414	0.20085					41.7894	0.24303					36.5874	0.2685		38.3792	0.33165
														34.9112	0.2707		35.9516	0.26814					53.9852	0.2537					33.5818	0.25047		36.9342	0.28669					35.258	0.25464					39.2462	0.29389		39.0728	0.28242
														28.9578	0.16106		36.6452	0.29451					38.726	0.18222					34.9112	0.27164		35.2002	0.21078					29.0734	0.14533					31.0386	0.26103		35.7782	0.30931
														31.9634	0.16087		34.391	0.29624					43.061	0.29163					30.7496	0.30824		36.9342	0.26219					39.7086	0.29646					40.6334	0.29753		33.2928	0.27398
														33.0038	0.25723		30.8074	0.27436					42.2518	0.31949					38.726	0.33313		34.4488	0.27489					39.3618	0.30902					41.3848	0.21326		35.1424	0.25153
														33.813	0.27205		36.5296	0.16621					34.2176	0.35317					36.0672	0.27675		28.8422	0.19067					34.0442	0.29516					48.3786	0.35361		34.9112	0.1239
														35.0846	0.29071		32.8882	0.19514					37.1076	0.32481					33.9864	0.20067		38.437	0.2837					27.455	0.03867					32.1946	0.25226		35.4892	0.25397
														36.3562	0.32747		30.5762	0.14822					40.4022	0.26407					37.2232	0.30247		27.455	0.07445					30.4606	0.1892					34.2754	0.31684		33.813	0.26964
														37.7434	0.29614		38.9572	0.33125					29.8826	0.24459					33.6396	0.33614		36.4718	0.24393					32.8882	0.23448					34.969	0.26766		37.3966	0.2909
														36.703	0.25729		40.9802	0.27012					28.9	0.15495					33.4662	0.16863		34.7378	0.20799					36.6452	0.27156					34.6222	0.25019		41.5582	0.33076
														36.703	0.25729		34.8534	0.16747					38.8416	0.33654					33.813	0.30322		34.3332	0.27749					28.5532	0.03169					34.2176	0.29389		35.836	0.27905
														41.616	0.31249		36.0094	0.21044					38.2636	0.23571					35.258	0.27118		32.8882	0.18279					33.8708	0.29652					44.2748	0.31976		36.4718	0.2945
														38.437	0.20627		37.859	0.28361					39.1306	0.31747					33.3506	0.29315		32.1946	0.23529					33.9286	0.11506					48.9566	0.30965		29.7092	0.10563
														38.437	0.30631		35.2002	0.18652					39.304	0.27453					36.414	0.32518		40.4022	0.25817					34.4488	0.12377					34.7956	0.24554		34.68	0.23167
														34.7378	0.20133		39.882	0.32549					38.3214	0.32528					33.5818	0.25362		38.7838	0.18898					28.9578	0.28873					52.887	0.35654		37.1076	0.30743
														35.4892	0.32806		35.4314	0.27284					31.6744	0.24377					42.1362	0.30793		39.882	0.2954					37.57	0.29999					36.3562	0.21433		46.2978	0.23311
														38.3214	0.31247		35.4892	0.18588					44.4482	0.32356					34.2176	0.35789		30.056	0.05578					33.813	0.32153					41.616	0.30479		43.7546	0.29524
														39.1306	0.27684		33.9864	0.27897					38.3792	0.27191					34.1598	0.2086		36.5296	0.24051					39.4196	0.32596					39.0728	0.29553		31.3854	0.2746
														36.8764	0.3047		30.8652	0.1652					54.6788	0.13388					35.7204	0.1603		33.7552	0.05729					33.0038	0.21319					39.4774	0.33009		30.2872	0.15881
														34.9112	0.2917		34.7956	0.10943					39.9976	0.26997					38.3214	0.25486		37.9168	0.19973					39.9976	0.26235					35.258	0.29082		40.1132	0.29366
														30.923	0.24077		38.437	0.26036					33.4084	0.29616					38.437	0.28767		42.3096	0.29374					37.9746	0.32262					35.836	0.26277		32.368	0.2303
														35.6626	0.28557		36.3562	0.28658					38.0902	0.32966					41.8472	0.31945		27.9174	0.06361					36.0672	0.29611					29.3624	0.26134		34.5644	0.28957
														38.3214	0.25544		34.5066	0.23766					39.5352	0.28133					35.8938	0.31349		34.0442	0.23293					42.483	0.19679					31.1542	0.2537		35.9516	0.30842
														37.281	0.28676		36.2984	0.27525					35.836	0.30236					35.3158	0.25664		31.3854	0.12398					36.992	0.27743					36.9342	0.22497		36.3562	0.18027
														38.3214	0.3467		35.0268	0.30915					31.9056	0.21086					28.6688	0.28028		46.2978	0.27511					36.8764	0.28956					33.9286	0.2184		33.1194	0.27145
														29.8826	0.31954		36.2984	0.2195					38.437	0.34136					38.4948	0.29489		39.0728	0.26155					37.1654	0.26871					42.3096	0.32829		33.6974	0.18021
														39.8242	0.3155		34.4488	0.29737					35.2002	0.22631					31.6744	0.29116		43.5812	0.30536					39.9398	0.28536					43.639	0.25295		32.4836	0.19132
														41.2692	0.31668		37.281	0.18443					37.1076	0.2308					44.0436	0.33493		34.2176	0.30436					34.5066	0.24448					45.373	0.33254		33.1194	0.17997
														31.3854	0.17248		39.2462	0.26644					38.7838	0.33815					37.0498	0.31916		30.8652	0.11533					36.4718	0.30987					33.6974	0.29786		39.2462	0.3036
														44.1592	0.31513		42.8298	0.32943					38.8994	0.32059					30.923	0.28775		37.7434	0.31498					32.8304	0.22536					33.9864	0.36815		30.2294	0.32263
														33.524	0.28458		39.6508	0.34529					43.4656	0.331					37.281	0.22931		39.015	0.22579					33.8708	0.33893					35.0846	0.27482		42.6564	0.31876
														37.6856	0.23751		36.2406	0.21687					38.0902	0.25657					42.0784	0.28824		34.5066	0.23077					34.1598	0.23375					39.2462	0.31947		36.8764	0.2625
														35.4892	0.33041		35.3158	0.20298					29.2468	0.10767					37.1076	0.29564		26.6458	0.19292					38.0902	0.23217					35.0268	0.2728		39.3618	0.28216
														33.524	0.30307		29.7092	0.19775					34.391	0.20582					41.0958	0.23241		40.4022	0.31598					28.8422	0.13592					32.946	0.21303		33.6974	0.12933
														38.6682	0.27298		44.0436	0.29188					39.015	0.25943					42.5408	0.28476		34.969	0.23					33.813	0.13076					35.8938	0.31188		39.3618	0.05428
														37.0498	0.272		35.6048	0.31687					39.8242	0.16141					43.8702	0.30266		34.68	0.32839					41.616	0.32142					42.3096	0.2941		35.547	0.27405
														38.0324	0.19793		36.4718	0.29078					35.3158	0.295					34.3332	0.2785		35.0268	0.26979					37.0498	0.31896					42.3096	0.2941		32.0212	0.2338
														36.4718	0.30762		35.9516	0.22188					41.4426	0.18098					38.2058	0.23194		32.8304	0.20677					37.0498	0.28958					36.703	0.37411		36.703	0.30725
														36.703	0.25758		37.3388	0.28997					36.4718	0.26337					40.6912	0.29256		37.1076	0.32745					36.125	0.30796					32.8304	0.32192		38.0902	0.30218
														32.657	0.30498		38.8994	0.29021					31.4432	0.18074					38.5526	0.33748		35.836	0.28267					37.6856	0.31123					38.8994	0.32146		37.1654	0.30488
														44.795	0.30877		39.2462	0.28837					37.7434	0.32128					37.859	0.30344		33.5818	0.32559					34.2176	0.23355					39.4774	0.33123		34.969	0.2205
														37.9746	0.27407		39.5352	0.30808					35.4314	0.29131					34.0442	0.3014		28.0908	0.08661					38.6682	0.28019					39.1306	0.31254		27.1082	0.23168
														33.6974	0.24435		20.6924	0.06173					36.414	0.2768					39.8242	0.30952		33.6396	0.24458					34.8534	0.30685					43.6968	0.30299		35.6048	0.11022
														35.836	0.22735		33.524	0.34746					34.5644	0.29392					41.038	0.31311		40.8068	0.32421					38.3214	0.29009					33.4084	0.36957		36.2984	0.30477
														31.79	0.25022		39.7086	0.24639					37.9746	0.33997					37.1654	0.30343		29.3046	0.16102					41.8472	0.30313					40.46	0.33648		31.3854	0.25506
														31.9634	0.26455		33.9864	0.22551					38.8416	0.2837					33.1772	0.28678		30.1716	0.07422					41.6738	0.34026					38.2058	0.32108		33.8708	0.19607
														42.7142	0.32035		34.2754	0.25435					36.414	0.3021					37.1076	0.30089		35.258	0.27138					35.0268	0.27025					39.4196	0.29291		41.5582	0.25332
														39.882	0.30453		38.3792	0.26868					32.7726	0.23989					37.8012	0.30284		34.5644	0.35771					35.0268	0.27025					33.524	0.30731		35.7204	0.14053
														34.3332	0.2844		40.171	0.29246					44.6216	0.36459					38.0902	0.30818		36.9342	0.25201					39.6508	0.15549					40.1132	0.25376		38.8994	0.28786
														32.4258	0.30012		36.992	0.2842					36.9342	0.29134					37.3388	0.30443		31.212	0.24306					48.0318	0.32332					35.7782	0.34985		33.1194	0.17216
														38.5526	0.29962		36.992	0.18809					34.0442	0.14527					39.9976	0.34297		29.4202	0.20634					34.8534	0.1297					44.6216	0.30533		41.0958	0.28786
														33.3506	0.3138		30.5762	0.21377					28.7844	0.21992					33.8708	0.25856		39.4196	0.25491					36.125	0.29278					37.5122	0.29328		40.8646	0.19002
														38.2058	0.30345		36.7608	0.30544					42.2518	0.27346					36.1828	0.28031		36.8186	0.25867					34.1598	0.2855					44.0436	0.31365		36.6452	0.20549
														39.593	0.34523		36.2406	0.24255					40.8646	0.30459					32.946	0.25522		30.5762	0.15334					39.8242	0.28264					44.0436	0.31365		33.813	0.28256
														33.0038	0.24362		39.015	0.21088					37.5122	0.29737					32.946	0.29854		37.57	0.25038					37.1654	0.27779					43.2344	0.33314		36.414	0.26947
														34.2754	0.25623		37.281	0.242					37.859	0.28532					31.9634	0.2273		37.6278	0.28715					36.9342	0.26666					39.5352	0.32556		37.4544	0.29954
														36.7608	0.28763		46.9336	0.3074					40.1132	0.30296					32.5992	0.25537		33.6396	0.23039					53.5228	0.3109					46.529	0.26414		35.547	0.12935
														40.6334	0.32107		36.3562	0.25522					36.2406	0.27227					36.3562	0.30297		40.6912	0.22906					36.2406	0.26282					35.3158	0.32891		36.0094	0.18688
														35.3158	0.23991		39.9976	0.30932					43.2344	0.27106					26.8192	0.22875		37.3966	0.29745					36.992	0.30919					40.8068	0.34116		27.5706	0.09664
														47.4538	0.31358		38.6104	0.28099					37.9746	0.27194					36.125	0.26182		40.6912	0.33008					35.3736	0.2598					34.7378	0.23279		39.3618	0.28839
														35.7782	0.33901		40.2288	0.31653					34.8534	0.32523					33.0616	0.28243		29.8826	0.27095					36.5874	0.21024					39.6508	0.29957		37.1076	0.27498
														32.5992	0.22404		30.056	0.2097					35.1424	0.28821					32.3102	0.23349		27.455	0.23556					36.4718	0.32904					35.6626	0.29259		33.6974	0.26569
														34.5644	0.30104		37.7434	0.29434					45.5464	0.32468					45.0262	0.29437		37.1076	0.20092					44.1592	0.3257					37.4544	0.28487		35.9516	0.28161
														38.5526	0.30961		33.0038	0.17799					30.8074	0.15825					40.8068	0.3145		34.6222	0.2786					37.4544	0.27038					42.1362	0.28209		32.4836	0.19352
														39.7664	0.29882		36.992	0.32623					36.2984	0.35392					41.616	0.29468		39.1306	0.20116					25.9522	0.0587					40.5756	0.33945		31.0386	0.23247
														41.5582	0.30565		34.68	0.2611					38.0324	0.32239					31.4432	0.33967		41.8472	0.28603					29.8826	0.16374					38.0902	0.31714		37.6856	0.2699
														39.0728	0.2994		38.6104	0.29275					34.3332	0.17664					40.2288	0.30368		33.3506	0.31					44.0436	0.33367					42.4252	0.25756		35.0846	0.31946
														40.5178	0.28186		37.3966	0.32715					35.7204	0.23192					36.1828	0.31827		34.1598	0.29432					32.368	0.18566					37.9746	0.26277		34.3332	0.31593
														37.57	0.30414		30.4606	0.11284					34.0442	0.23708					37.0498	0.30786		30.8074	0.1991					37.6278	0.26579					37.5122	0.32546		41.905	0.31478
														34.391	0.24451		35.4892	0.28029					37.281	0.3017					39.0728	0.25984		34.5066	0.30235					30.8074	0.08385					32.3102	0.27866		49.2456	0.37428
														40.0554	0.32335		32.0212	0.19053					41.4426	0.30837					33.1194	0.28242		29.2468	0.1371					35.7204	0.23217					39.9976	0.32833		31.6744	0.24282
														36.7608	0.2614		35.258	0.2953					36.2984	0.29542					36.4718	0.27366		26.1834	0.20754					42.0206	0.28323					37.6856	0.31962		33.9864	0.29529
														36.2984	0.27773		32.368	0.24622					39.4774	0.31677					38.3214	0.30666		33.8708	0.30742					33.5818	0.21604					36.2406	0.28606		34.969	0.25166
														37.57	0.2945		30.2872	0.16081					36.125	0.31855					36.703	0.22652		35.8938	0.2898					39.2462	0.21794					36.2406	0.28606		31.3854	0.268
														39.9398	0.29574		38.7838	0.28142					37.57	0.27063					39.8242	0.33331		29.0734	0.15934					33.0038	0.25868					33.524	0.20355		44.506	0.32135
														33.2928	0.32474		36.125	0.30683					39.4196	0.2566					38.9572	0.29128		37.281	0.21284					36.2984	0.29517					35.258	0.3207		35.7782	0.17558
														36.5874	0.30281		34.68	0.25734					33.6974	0.27792					34.8534	0.28351		39.882	0.29755					40.1132	0.32912					35.6626	0.18368		31.79	0.10068
														40.749	0.34561		35.3158	0.261					42.6564	0.31127					33.6974	0.19579		35.3736	0.25628					36.5296	0.3046					37.9746	0.33226		36.125	0.08399
														35.3736	0.28567		41.2114	0.30282					36.125	0.30825					33.813	0.26601		24.3916	0.16404					38.8416	0.3418					36.2984	0.26505		30.6918	0.20083
														37.6856	0.31147		35.6626	0.17621					41.327	0.30511					38.0324	0.33277		35.836	0.21867					38.148	0.27792					35.0846	0.19441		36.703	0.31609
														36.1828	0.2263		34.2176	0.26138					33.524	0.24979					38.5526	0.34373		37.859	0.33145					36.5874	0.3165					30.7496	0.16353		32.7726	0.27181
														33.7552	0.313		31.3854	0.27013					39.8242	0.32743					41.616	0.29776		44.0436	0.24552					31.8478	0.20412					44.1592	0.33136		32.8304	0.23765
														34.8534	0.20077		39.7664	0.19561					36.1828	0.30397					35.4314	0.26931		39.9976	0.2929					27.0504	0.17986					35.547	0.37461		30.634	0.2159
														32.946	0.26368		39.0728	0.295					38.5526	0.24557					33.3506	0.23002		31.9056	0.33511					39.4196	0.28773					39.015	0.33856		31.0964	0.19432
														34.102	0.21977		37.281	0.29196					38.437	0.23817					41.3848	0.3328		33.4084	0.28842					36.0672	0.32192					41.3848	0.36086		32.4836	0.23749
														37.1654	0.28307		30.8074	0.1364					37.9168	0.29151					31.6744	0.33277		35.7204	0.23632					36.4718	0.25225					37.859	0.3341		34.969	0.25477
														34.6222	0.26296		37.859	0.285					41.9628	0.31133					51.7888	0.33055		35.3158	0.30272					32.079	0.30931					33.9286	0.13458		36.3562	0.25538
														36.8764	0.32566		41.5004	0.28778					33.5818	0.23378					35.6048	0.29694		35.3158	0.18765					34.4488	0.35588					47.9162	0.31902		31.6166	0.21951
														34.391	0.28296		33.3506	0.2761					34.5066	0.30751					42.4252	0.31632		54.043	0.33678					30.9808	0.11472					42.3674	0.33309		32.1368	0.19551
														41.6738	0.35721		30.923	0.14764					41.616	0.34656					30.1138	0.30688		35.836	0.27806					40.46	0.26963					39.9398	0.33407		30.345	0.27898
														32.4258	0.28427		33.6974	0.26834					40.5756	0.26025					33.8708	0.1909		31.2698	0.16796					39.0728	0.3136					40.1132	0.36587		33.4084	0.25452
														35.9516	0.28377		37.6856	0.31121					38.726	0.33905					38.2058	0.24666		35.8938	0.26065					35.6048	0.35154					34.391	0.26417		29.767	0.17027
														34.3332	0.20038		38.4948	0.29391					50.7484	0.32644					32.7726	0.28938		34.1598	0.24448					30.5762	0.18193					36.4718	0.26158		34.68	0.32258
														37.1654	0.31871		33.1194	0.17629					43.1766	0.32455					36.703	0.29522		34.7378	0.28718					40.0554	0.32283					44.1592	0.31644		37.3966	0.23583
														26.1256	0.28038		34.3332	0.27983					40.3444	0.24869					39.5352	0.28736		39.3618	0.30004					40.171	0.24914					39.0728	0.29082		33.6974	0.29074
														31.9056	0.21763		33.6974	0.18004					42.9454	0.31371					37.8012	0.25544		34.2754	0.22751					35.7204	0.15194					39.015	0.28149		45.7776	0.31395
														42.194	0.30126		35.4314	0.18595					36.2406	0.30995					36.2406	0.24709		38.8416	0.2385					32.4258	0.11195					32.0212	0.31176		42.4252	0.30176
														34.0442	0.16858		35.547	0.28479					36.9342	0.30409					35.2002	0.29623		36.4718	0.36425					33.1194	0.15781					36.4718	0.26522		27.455	0.07589
														42.5986	0.31052		32.5414	0.17507					38.2636	0.32047					36.5874	0.32008		31.79	0.05938					53.2916	0.25834					43.9858	0.30502		33.524	0.16656
														36.3562	0.28851		34.7956	0.33125					39.1884	0.25978					38.2058	0.28802		37.1076	0.31281					36.125	0.28293					40.6334	0.339		27.455	0.28831
														37.5122	0.29316		39.015	0.28743					39.4196	0.25643					34.7378	0.28753		36.8186	0.27404					26.9348	0.20639					32.4258	0.28091		35.547	0.30012
														34.1598	0.25256		33.5818	0.30619					32.7726	0.28933					32.657	0.27884		33.0038	0.15953					40.9224	0.32111					40.46	0.3053		32.8304	0.28856
														33.0616	0.21253		39.7664	0.2942					34.7956	0.22592					35.2002	0.28677		34.2176	0.07645					36.1828	0.31733					39.9976	0.34214		33.6396	0.09404
														38.6682	0.37903		39.7664	0.28556					35.6048	0.32491					36.1828	0.29931		30.7496	0.19908					36.992	0.29335					41.6738	0.30955		38.726	0.29004
														40.2288	0.30563		30.345	0.21056					33.524	0.26317					36.992	0.23991		41.2114	0.31837					39.882	0.32158					37.7434	0.28414		33.8708	0.26664
														35.4892	0.27349		30.2872	0.17068					41.5582	0.31726					36.125	0.30341		36.6452	0.27858					42.1362	0.30251					41.7894	0.32958		25.143	0.2069
														38.4948	0.30967		35.3158	0.26911					36.5296	0.23814					42.0784	0.32439		33.0616	0.32744					33.9286	0.20008					41.0958	0.31959		26.4724	0.18127
														29.3624	0.20019		29.9404	0.19542					43.9858	0.32181					36.992	0.27835		37.2232	0.27015					36.7608	0.28616					35.9516	0.32066		34.1598	0.24756
														27.5706	0.307		34.7956	0.23741					37.7434	0.23132					46.9914	0.32423		27.455	0.13853					31.79	0.29804					35.3736	0.27786		37.859	0.26369
														33.235	0.27822		28.9578	0.18281					28.9578	0.20339					39.1884	0.28356		23.987	0.06031					35.6048	0.27015					32.1368	0.21408		39.1306	0.32394
														37.3388	0.3158		42.3674	0.31787					40.5756	0.3294					35.8938	0.19407		29.7092	0.29213					35.0268	0.17372					43.35	0.32155		39.0728	0.29158
														40.9224	0.31474		40.9224	0.30899					32.0212	0.26249					39.3618	0.31114		34.8534	0.30811					38.6104	0.33035					32.8882	0.28083		49.3612	0.3163
														44.3904	0.33536		33.4084	0.27515					34.1598	0.29427					34.7378	0.27702		33.6974	0.27211					30.5762	0.1946					33.3506	0.32643		35.0268	0.19578
														35.3736	0.22375		40.8068	0.33461					36.414	0.26797					32.946	0.29896		36.1828	0.19057					36.6452	0.26779					39.0728	0.30069		36.9342	0.30344
														41.4426	0.3444		36.7608	0.20416					39.0728	0.29501					33.813	0.29735		34.4488	0.26159					39.0728	0.31551					38.6682	0.28091		28.9	0.1923
														37.281	0.29243		39.0728	0.30488					37.1076	0.2526					36.3562	0.31142		35.8938	0.21505					37.0498	0.26093					32.5992	0.26067		39.8242	0.29245
														37.3966	0.19711		35.6048	0.26301					37.6856	0.27585					37.6856	0.26944		37.281	0.30486					37.859	0.32					42.194	0.32685		32.8882	0.23828
														33.6396	0.21339		28.9	0.19534					36.0094	0.2481					30.923	0.21519		40.9802	0.16729					39.9398	0.29372					36.992	0.1848		39.4196	0.34836
														49.8814	0.03965		44.8528	0.33961					38.8416	0.30876					36.992	0.18748		38.3792	0.22141					37.5122	0.24577					42.5408	0.34321		26.6458	0.21788
														32.1946	0.23624		36.0672	0.31626					36.0094	0.32151					41.1536	0.30276		38.3792	0.29801					39.2462	0.31239					38.4948	0.31816		37.9746	0.23005
														34.5644	0.25504		31.2698	0.26005					38.3214	0.21459					40.6912	0.28254		38.437	0.28601					40.6912	0.32865					35.7782	0.31		32.7148	0.23211
														40.6334	0.30189		30.6918	0.1683					35.6626	0.26519					36.8186	0.30085		39.2462	0.31576					35.4314	0.2028					39.304	0.33455		35.8938	0.23838
														31.4432	0.20795		34.8534	0.18718					38.4948	0.29062					34.6222	0.32307		40.5178	0.31801					36.414	0.27466					42.772	0.32098		28.9578	0.25018
														37.6278	0.15492		38.6104	0.23514					34.7956	0.20308					39.593	0.25411		33.7552	0.291					36.125	0.34426					36.9342	0.31587		37.1654	0.28924
														30.9808	0.16261		36.3562	0.33249					38.3214	0.2255					27.0504	0.05723		35.836	0.2561					36.2984	0.28248					36.1828	0.27144		38.7838	0.29278
														29.767	0.17738		35.6626	0.24309					35.3736	0.32072					35.836	0.34058		33.6396	0.24213					39.882	0.30531					38.148	0.28875		32.7148	0.28085
														36.414	0.28945		34.7956	0.27741					34.102	0.29088					41.038	0.23052		28.611	0.15316					50.0548	0.20804					38.2058	0.2826		25.3164	0.14461
														34.68	0.24718		36.3562	0.26815					36.5874	0.25323					34.4488	0.21481		35.6048	0.28682					36.0672	0.31569					34.391	0.27016		36.3562	0.15222
														44.6216	0.30031		40.46	0.30283					39.0728	0.28766					35.9516	0.32455		38.0324	0.31047					38.9572	0.26853					32.946	0.27418		29.478	0.1096
														36.703	0.31248		36.8186	0.20297					36.7608	0.20499					37.7434	0.28818		40.6912	0.3073					34.9112	0.34575					35.6626	0.32481		33.9286	0.2324
														37.859	0.30822		32.368	0.2839					39.7086	0.26938					37.281	0.26074		51.9044	0.19268					39.4196	0.25911					36.2406	0.31124		37.3966	0.16547
														34.969	0.27179		34.102	0.19707					43.8702	0.31452					41.1536	0.33726		38.0324	0.29629					40.2288	0.32633					38.0902	0.2375		34.102	0.20506
														38.8416	0.32537		31.4432	0.17246					33.7552	0.27243					32.4836	0.2813		43.1188	0.339					35.3158	0.33887					41.038	0.30898		34.102	0.20506
														33.0616	0.2744		33.2928	0.20055					40.6334	0.2212					34.5644	0.28651		36.8764	0.26522					35.3158	0.33887					38.8994	0.35276		30.2294	0.15287
														42.3096	0.30469		31.8478	0.22656					40.9802	0.29225					41.6738	0.33765		41.6738	0.30029					37.3966	0.21031					40.171	0.29259		37.9168	0.28044
														29.767	0.3203		35.547	0.16973					34.969	0.25988					36.125	0.32005		34.102	0.27188					31.4432	0.3086					39.6508	0.33814		30.5184	0.20873
														38.4948	0.28617		34.4488	0.3037					33.9286	0.31441					35.4892	0.32015		39.1306	0.29314					35.2002	0.19844					31.6744	0.21005		35.7204	0.27855
														34.0442	0.28044		40.4022	0.23581					41.7316	0.33916					37.9168	0.26134		34.68	0.1808					39.4774	0.2306					45.2574	0.29786		29.8248	0.22067
														37.6856	0.27941		39.6508	0.28756					37.2232	0.24034					36.2406	0.29766		32.4258	0.1789					33.0038	0.18731					36.8186	0.30197		29.0156	0.17676
														40.6334	0.28419		33.9864	0.23207					32.4258	0.27973					35.547	0.32548		35.3158	0.30496					32.7148	0.19409					48.6098	0.32349		38.2636	0.25948
														34.5644	0.21567		33.0038	0.31773					31.6166	0.28866					36.4718	0.18326		33.9286	0.19485					33.9864	0.26094					41.0958	0.3265		39.5352	0.26793
														28.9578	0.18017		40.1132	0.28401					35.3158	0.24979					37.859	0.27679		31.212	0.23451					33.6974	0.20832					37.9168	0.30982		31.79	0.08253
														35.3736	0.37048		31.0964	0.21002					37.9746	0.34121					37.281	0.27766		37.1654	0.28716					35.4892	0.34214					37.9168	0.3477		52.4246	0.27368
														43.4078	0.2932		36.3562	0.32132					32.5414	0.28854					35.4892	0.21179		30.5184	0.15292					27.2816	0.13175					36.3562	0.27757		43.061	0.33114
														37.9168	0.31282		35.4314	0.19132					34.9112	0.31807					43.8124	0.33331		31.0386	0.28002					38.3792	0.29975					36.2984	0.24922		41.1536	0.10976
														40.171	0.32803		34.8534	0.13653					25.6632	0.01571					40.9224	0.32921		40.8646	0.30252					39.3618	0.31362					38.6104	0.28878		31.3854	0.22762
														42.483	0.27916		33.2928	0.29761					31.5588	0.17426					30.6918	0.21228		38.9572	0.28619					30.7496	0.15328					37.3966	0.28631		36.1828	0.22002
														37.8012	0.2879		32.1368	0.27473					41.4426	0.26341					36.5874	0.31948		41.6738	0.31798					36.5874	0.28895					41.038	0.32864		35.6048	0.28555
														31.5588	0.15261		32.0212	0.33615					37.2232	0.28899					38.9572	0.33874		33.4662	0.2481					33.8708	0.30538					37.9168	0.32095		45.373	0.29288
														30.2872	0.22504		36.992	0.22947					30.1716	0.13059					40.1132	0.32879		29.3046	0.19307					34.0442	0.29559					33.3506	0.2342		41.8472	0.22384
														40.171	0.31426		46.9914	0.33071					39.304	0.31797					54.5632	0.32528		41.3848	0.3013					31.212	0.23784					39.1306	0.35103		31.0964	0.20905
														35.9516	0.32065		34.391	0.27189					39.9976	0.36315					32.1368	0.23717		37.4544	0.30916					35.7782	0.27998					40.9224	0.31741		39.6508	0.29059
														37.9168	0.34125		33.4084	0.31572					42.483	0.33185					33.8708	0.29734		39.1884	0.28102					40.2288	0.27514					53.465	0.32991		37.1076	0.22719
														31.79	0.26941		38.6104	0.25626					42.772	0.26786					37.9746	0.23128		37.0498	0.27352					35.9516	0.2397					35.7204	0.3149		35.836	0.30448
														39.1306	0.23942		37.1076	0.30425					37.3966	0.27752					39.7086	0.29853		34.969	0.27617					30.7496	0.33943					33.7552	0.26639		35.836	0.30448
														42.8876	0.29994		36.6452	0.3063					40.5756	0.30439					46.0666	0.35479		43.2922	0.30551					33.4084	0.24791					38.6682	0.35372		32.1368	0.22767
														44.0436	0.23676		35.0268	0.23568					37.281	0.24824					31.0964	0.27112		35.8938	0.25561					33.4084	0.23488					34.3332	0.2492		36.0672	0.30456
														43.9858	0.3086		34.2754	0.28017					31.1542	0.25713					41.616	0.23497		34.2754	0.34733					34.8534	0.19156					42.6564	0.34534		38.3214	0.29614
														30.1138	0.25218		41.2692	0.2663					36.5296	0.26809					37.4544	0.25406		35.6626	0.27803					35.547	0.20354					36.7608	0.31081		38.3792	0.30703
														38.2058	0.32297		34.7956	0.18045					39.7664	0.30425					33.4084	0.29217		33.1194	0.24458					35.1424	0.27303					36.3562	0.33198		37.7434	0.2103
														41.616	0.30299		33.2928	0.19446					34.2176	0.35726					35.6626	0.32511		36.8186	0.31415					36.703	0.30578					38.726	0.28906		42.483	0.29104
														39.882	0.28105		39.9398	0.25099					34.391	0.18327					34.9112	0.27653		39.4196	0.15006					30.634	0.20285					37.1076	0.32803		41.4426	0.28443
														50.5172	0.3048		27.6862	0.14436					37.8012	0.26508					34.2754	0.26354		38.7838	0.31908					43.2922	0.32031					41.327	0.32101		49.4768	0.28259
														34.7378	0.23967		41.2692	0.31743					39.7086	0.30985					36.8186	0.30976		30.345	0.22385					41.8472	0.29171					44.2748	0.30472		36.8186	0.28557
														34.969	0.30137		43.5234	0.30179					33.235	0.25065					35.836	0.30148		33.8708	0.31225					36.414	0.2808					40.2866	0.3598		35.7204	0.23708
														35.547	0.23973		36.8764	0.21853					36.3562	0.27389					37.3966	0.2952		39.593	0.26751					34.4488	0.21652					31.8478	0.31161		32.3102	0.20252
														39.4196	0.31293		31.1542	0.2838					43.5812	0.28509					26.7614	0.17906		39.4196	0.27271					34.0442	0.28878					32.8882	0.23078		31.4432	0.22347
														34.9112	0.28541		35.1424	0.31834					43.35	0.30574					40.9802	0.31458		37.859	0.29322					34.68	0.22956					34.9112	0.34705		42.6564	0.25071
														45.0262	0.32372		34.6222	0.25056					37.3966	0.2943					38.5526	0.28433		34.68	0.171					36.5296	0.27574					36.2984	0.34836		31.0386	0.22981
														35.8938	0.22392		35.836	0.29466					38.9572	0.25929					34.8534	0.32129		35.6626	0.20016					34.4488	0.2397					38.148	0.33476		35.7204	0.29962
														37.0498	0.33023		31.2698	0.23056					42.9454	0.28308					33.9864	0.27225		36.8186	0.25672					42.8876	0.3245					36.2406	0.26995		37.1076	0.20907
														32.5414	0.26432		33.5818	0.29873					40.749	0.27471					36.9342	0.25636		31.9056	0.28739					34.68	0.26035					37.3388	0.29991		31.2698	0.12511
														30.6918	0.2294		37.2232	0.30917					32.7148	0.23946					36.5874	0.27135		27.9174	0.1445					35.3736	0.27785					32.657	0.30382		46.2978	0.27248
														39.1306	0.26894		37.4544	0.19611					32.2524	0.22171					33.524	0.22696		44.3326	0.30407					33.2928	0.30461					37.7434	0.31319		46.2978	0.27248
														33.4662	0.21889		36.3562	0.2358					46.5868	0.28655					34.7956	0.26904		36.2406	0.23964					40.3444	0.27238					50.1126	0.33998		38.7838	0.29109
														33.2928	0.27859		34.9112	0.3052					31.2698	0.17557					37.3966	0.29226		34.2754	0.26208					40.5756	0.27956					31.7322	0.20531		38.726	0.29708
														36.125	0.18178		34.7956	0.31529					32.7148	0.12911					43.928	0.28481		36.703	0.27511					37.4544	0.26736					54.8522	0.17106		34.0442	0.28582
														36.9342	0.30451		31.212	0.17316					31.5588	0.30086					37.859	0.2808		38.3214	0.28712					35.8938	0.20536					33.3506	0.24091		33.524	0.19505
														32.946	0.24836		36.992	0.30061					42.5986	0.27604					30.923	0.27076		25.0274	0.08174					36.992	0.28851					39.4774	0.36413		36.414	0.25454
														32.1946	0.2476		35.7782	0.27498					36.0094	0.18037					37.5122	0.33033		33.9864	0.20696					38.6104	0.29025					37.57	0.29065		34.1598	0.23528
														37.0498	0.29061		35.547	0.22015					39.9976	0.31504					40.749	0.19285		34.0442	0.24192					34.391	0.26923					36.8186	0.27114		37.5122	0.28617
														35.547	0.27409		33.5818	0.21103					42.0784	0.32692					37.859	0.29242		41.327	0.32654					34.102	0.30004					45.3152	0.30378		34.2176	0.10622
														45.662	0.3146		41.7894	0.26339					33.4084	0.27481					43.7546	0.27971		33.0038	0.30347					37.3388	0.29501					43.2344	0.29446		35.7782	0.18575
														35.7204	0.23624		41.616	0.31499					34.2754	0.32047					36.2406	0.24395		35.0846	0.2945					40.0554	0.31769					36.9342	0.26895		26.4724	0.16072
														36.703	0.2911		41.7316	0.30664					42.0784	0.32512					36.125	0.28882		31.212	0.16305					28.5532	0.12356					39.9398	0.30375		27.9174	0.1341
														35.7204	0.30918		34.68	0.27584					35.7204	0.30559					33.0038	0.16078		31.212	0.20486					32.2524	0.21585					45.373	0.30465		31.9634	0.12027
														33.0616	0.28757		30.8652	0.10953					30.4606	0.26199					34.3332	0.26291		31.6744	0.17097					38.3792	0.31498					33.1772	0.22234		40.5178	0.27664
														35.0846	0.31303		32.4836	0.21937					38.2058	0.29276					33.8708	0.28711		28.0908	0.22044					33.6396	0.28533					38.4948	0.29155		37.9746	0.24481
														42.3096	0.32445		40.4022	0.30042					36.8186	0.27704					32.7726	0.31183		38.437	0.28779					36.125	0.28123					35.3736	0.29862		39.4774	0.29036
														45.5464	0.29637		38.437	0.28358					35.4314	0.14403					35.7204	0.29338		37.1654	0.29049					33.1772	0.29272					33.2928	0.27417		39.7086	0.3052
														33.6396	0.20063		32.368	0.16797					39.2462	0.29056					32.2524	0.34101		37.2232	0.23876					33.5818	0.30106					38.2636	0.3367		34.7378	0.19639
														34.8534	0.26433		39.4774	0.30643					40.2866	0.27726					36.7608	0.29829		36.0094	0.25512					32.079	0.20228					39.7086	0.29252		37.3966	0.20947
														34.5066	0.32274		44.795	0.34929					33.235	0.30643					34.6222	0.30437		32.5992	0.24731					27.3394	0.23592					35.3158	0.3618		29.2468	0.21263
														37.1654	0.28096		35.258	0.2441					41.327	0.33125					37.3966	0.30447		41.2692	0.29757					38.5526	0.30632					37.0498	0.25311		34.5066	0.10131
														33.4662	0.30589		41.616	0.30824					29.7092	0.19118					42.8876	0.30117		40.9224	0.29846					39.0728	0.30507					32.2524	0.18631		38.4948	0.3113
														38.6682	0.3198		34.9112	0.27273					36.0672	0.24105					40.6912	0.27518		39.015	0.29526					32.946	0.34385					38.8994	0.32336		38.4948	0.3113
														45.3152	0.32129		34.0442	0.21974					38.4948	0.3384					33.9864	0.24723		33.235	0.26087					34.0442	0.22564					37.4544	0.27597		36.1828	0.1896
														31.3276	0.30537		36.3562	0.20701					37.3966	0.30068					39.7086	0.31642		38.437	0.01873					33.5818	0.29867					38.3792	0.3778		41.038	0.309
														35.4892	0.28447		33.235	0.20687					29.3624	0.02391					39.3618	0.33046		31.1542	0.28715					38.5526	0.26925					33.524	0.2535		31.6744	0.27128
														40.8068	0.33447		34.6222	0.26174					40.6912	0.29544					44.6794	0.30901		28.322	0.15795					35.258	0.265					36.703	0.27772		33.0038	0.08287
														39.1306	0.28681		38.726	0.33376					33.9286	0.35589					40.8646	0.31256		41.5582	0.30972					33.5818	0.15425					35.0268	0.33932		31.6166	0.20971
														38.5526	0.28587		39.1306	0.2986					36.1828	0.33386					42.1362	0.32026		34.102	0.27729					38.6104	0.31026					32.5992	0.30202		36.4718	0.33932
														41.327	0.28504		41.6738	0.34097					35.1424	0.30929					36.9342	0.18108		36.5874	0.27172					34.969	0.29295					40.9802	0.35371		31.2698	0.26012
														41.327	0.33153		33.2928	0.27608					36.7608	0.29735					28.2642	0.06822		31.3854	0.32898					37.2232	0.21906					40.2288	0.31271		37.7434	0.28918
														32.4836	0.22555		43.8124	0.30333					39.1306	0.25559					35.4314	0.25694		36.8764	0.19266					33.3506	0.28971					37.1654	0.33754		31.2698	0.1805
														35.3158	0.24343		30.8652	0.27015					40.0554	0.2765					33.9864	0.26324		33.5818	0.22201					33.3506	0.28971					36.5296	0.34243		35.258	0.25646
														37.859	0.29706		31.3854	0.22626					37.4544	0.27703					38.148	0.29503		30.2294	0.21485					30.345	0.34735					37.5122	0.33247		41.7894	0.29061
														37.6278	0.32954		36.0672	0.17192					33.3506	0.28896					39.7086	0.25647		33.7552	0.18975					30.9808	0.21394					31.0964	0.26475		33.9286	0.20447
														36.7608	0.30649		36.992	0.31172					35.4314	0.29387					39.6508	0.34079		33.1772	0.22857					33.1772	0.27838					36.3562	0.28968		35.6626	0.29538
														39.8242	0.30636		31.3854	0.28058					39.9398	0.25163					28.2642	0.22874		37.4544	0.31847					38.7838	0.31267					30.6918	0.32194		32.7148	0.2023
														40.1132	0.3551		31.6744	0.19224					26.7614	0.20333					42.5986	0.28422		37.281	0.32955					36.4718	0.03967					31.4432	0.1852		37.4544	0.22815
														34.7956	0.26738		40.4022	0.23302					39.4774	0.29053					31.3854	0.26029		37.6278	0.27734					33.6974	0.16305					36.992	0.3111		28.611	0.20258
														32.079	0.18105		36.414	0.29188					39.7086	0.24692					38.148	0.3252		35.4892	0.22549					35.4314	0.26176					37.1076	0.29157		37.281	0.30711
														37.3388	0.28304		40.6334	0.2801					39.015	0.31141					32.3102	0.20548		33.4662	0.20301					35.9516	0.22186					38.6104	0.27566		31.0386	0.25242
														35.7782	0.28009		32.1946	0.27645					34.102	0.2789					42.8876	0.3155		30.5762	0.18996					24.5072	0.14887					46.3556	0.30794		34.7956	0.31578
														36.0094	0.27455		34.68	0.25339					30.5762	0.10829					34.2754	0.2199		35.547	0.20016					37.6856	0.29988					39.4196	0.32979		32.2524	0.23406
														41.5582	0.30701		33.8708	0.21083					40.8068	0.28335					36.1828	0.1969		35.6626	0.24969					34.8534	0.24603					38.8416	0.29065		46.4712	0.29419
														44.217	0.30926		41.0958	0.28441					42.3096	0.26276					35.7204	0.30918		43.928	0.30624					39.2462	0.2697					37.1654	0.30782		34.6222	0.16629
														34.5644	0.30734		34.4488	0.27816					32.3102	0.26602					34.68	0.20407		31.7322	0.22175					30.8074	0.14781					37.2232	0.33033		40.4022	0.2926
														37.9168	0.26742		32.1946	0.26246					35.3158	0.28277					33.813	0.28799		38.2636	0.25507					34.4488	0.29422					42.772	0.30626		32.2524	0.27856
														34.3332	0.30329		32.8304	0.16859					41.2114	0.31382					35.6048	0.29425		30.1716	0.13757					39.4774	0.24007					34.3332	0.24107		34.7956	0.29354
														42.3096	0.33515		33.235	0.13934					35.1424	0.17826					33.813	0.33005		29.3046	0.15467					34.102	0.31513					36.125	0.28174		31.7322	0.26633
														34.2176	0.14551		29.9982	0.37009					39.9976	0.35015					34.0442	0.31306		38.9572	0.31359					36.9342	0.28469					32.368	0.21197		37.3388	0.32424
														34.5066	0.2438		31.9634	0.29268					38.437	0.24528					41.6738	0.30829		41.327	0.28336					35.547	0.15134					35.9516	0.28223		43.8124	0.28516
														39.015	0.34019		31.6744	0.26542					34.4488	0.18275					33.4084	0.17717		33.0616	0.30897					38.0902	0.18489					40.46	0.34568		43.0032	0.25311
														42.483	0.31882		36.6452	0.2471					35.9516	0.31888					33.4662	0.35381		33.524	0.25874					36.703	0.35142					45.5464	0.33818		33.0616	0.18036
														36.5296	0.3342		35.4314	0.24455					30.2872	0.17215					27.9752	0.215		35.9516	0.27381					38.8416	0.20873					35.0846	0.28717		33.0616	0.18036
														33.3506	0.21948		41.327	0.33739					33.7552	0.22298					41.2114	0.35382		30.2294	0.25669					36.992	0.25581					33.4662	0.30075		36.125	0.17385
														36.125	0.24493		29.8248	0.18929					35.1424	0.30563					32.8304	0.24212		37.3966	0.26629					30.8652	0.08535					29.767	0.16744		39.7086	0.22173
														36.5874	0.20552		32.368	0.17764					33.524	0.22659					29.3046	0.26892		32.5992	0.21976					36.7608	0.31014					32.8882	0.27218		35.4314	0.21727
														34.2754	0.32787		33.1772	0.30004					37.1654	0.35914					38.726	0.2862		34.1598	0.15965					37.1076	0.26439					34.5066	0.22705		32.2524	0.27137
														33.9286	0.26667		36.5296	0.3097					37.9746	0.22482					35.2002	0.26119		35.258	0.2834					33.235	0.30237					31.4432	0.23756		33.4084	0.29342
														29.478	0.19265		38.437	0.14625					33.235	0.23436					30.6918	0.22903		32.079	0.20502					35.0846	0.21169					46.7602	0.30916		31.6744	0.23793
														32.4836	0.26741		54.8522	0.32645					31.6744	0.23993					40.8068	0.30689		39.1306	0.31039					41.2114	0.13962					41.616	0.29975		28.7844	0.13343
														32.946	0.29219		36.703	0.22782					36.5874	0.20534					40.8068	0.35807		36.414	0.32415					37.1654	0.26488					38.5526	0.28559		34.4488	0.24765
														39.1306	0.32275		39.4774	0.3011					38.0902	0.28173					35.4892	0.29576		38.437	0.33916					35.7782	0.3022					36.0672	0.30779		38.0324	0.26161
														39.6508	0.29634		35.0268	0.20073					33.6396	0.29945					34.3332	0.30217		36.0672	0.2597					35.6626	0.15183					35.2002	0.27732		30.5762	0.18794
														40.2866	0.28815		34.3332	0.18166					39.4774	0.33236					39.5352	0.34838		34.7378	0.28576					39.304	0.31391					35.4892	0.3237		35.3158	0.30107
														33.4084	0.26035		30.4606	0.17752					31.79	0.26699					37.0498	0.23314		29.2468	0.04046					41.6738	0.32829					38.2058	0.32461		37.1076	0.27162
														38.3214	0.2493		40.5756	0.31245					41.4426	0.29062					36.4718	0.29489		32.1368	0.17268					32.7148	0.26412					44.0436	0.34092		36.414	0.20448
														54.91	0.22986		36.7608	0.22944					35.3158	0.2617					35.7782	0.27234		35.7782	0.31192					44.9106	0.25509					36.5296	0.32901		42.0206	0.35626
														40.171	0.26616		33.524	0.29976					35.6048	0.32488					38.7838	0.30856		36.9342	0.21143					34.0442	0.19239					35.7204	0.29205		38.6682	0.24842
														38.2636	0.31775		38.148	0.20919					43.4078	0.27333					37.8012	0.30232		51.153	0.23373					40.4022	0.26351					40.8068	0.2969		36.5874	0.18553
														37.3966	0.31398		32.5992	0.26346					41.2114	0.33118					36.2984	0.32025		24.1604	0.04593					37.5122	0.14921					34.2176	0.30327		46.529	0.30268
														42.3096	0.28822		36.7608	0.25529					38.6682	0.21126					34.0442	0.24921		37.7434	0.2651					36.4718	0.28113					37.859	0.25654		33.4084	0.23879
														37.2232	0.27245		31.9634	0.22894					41.8472	0.30823					41.5582	0.33403		35.2002	0.16194					35.3736	0.22562					37.5122	0.27596		37.3966	0.32831
														38.3214	0.26252		34.102	0.21424					35.258	0.30517					37.2232	0.26809		38.3214	0.2499					29.5936	0.19791					39.7664	0.32378		26.9348	0.13259
														38.7838	0.24373		36.414	0.29844					39.1306	0.30804					30.7496	0.22235		43.4656	0.34847					38.8994	0.17865					42.7142	0.33691		41.038	0.28746
														37.1076	0.30253		33.813	0.22342					32.8882	0.27996					37.0498	0.25809		40.2866	0.26456					30.5184	0.28297					32.368	0.36505		33.4662	0.25217
														36.2984	0.29387		40.9802	0.30211					32.368	0.09126					32.1946	0.29031		36.992	0.30402					35.6626	0.27294					32.5992	0.24686		39.882	0.30317
														37.7434	0.25931		33.524	0.24113					36.3562	0.28524					35.7204	0.25813		35.258	0.18074					34.68	0.24157					29.5358	0.09561		40.6912	0.30389
														38.6682	0.30412		38.3792	0.3036					39.6508	0.25927					31.8478	0.28098		31.5588	0.28332					38.3792	0.30646					37.5122	0.28188		36.9342	0.31367
														34.7956	0.25172		33.4662	0.25426					42.3096	0.20288					30.7496	0.22566		36.0672	0.22091					37.859	0.29272					41.327	0.30857		32.1946	0.14897
														36.3562	0.28287		38.437	0.32427					35.2002	0.30022					35.3158	0.30076		34.2176	0.29389					27.166	0.0574					41.4426	0.28381		39.882	0.29151
														51.7888	0.23347		36.414	0.29432					36.703	0.22097					35.3158	0.30076		30.2294	0.23728					35.4892	0.29504					40.9802	0.33229		30.8074	0.2869
														34.6222	0.25017		34.969	0.19462					32.5414	0.21406					34.102	0.23707		36.1828	0.14242					36.8186	0.22743					38.2636	0.28872		38.4948	0.02772
														39.2462	0.29834		32.3102	0.21235					36.0094	0.25682					42.483	0.31193		42.194	0.28809					39.6508	0.28893					39.5352	0.28534		34.391	0.18768
														37.7434	0.3182		36.8186	0.25027					38.2058	0.3224					36.5874	0.27423		33.6396	0.2702					37.6856	0.27737					37.281	0.3224		36.7608	0.17337
														32.4258	0.26868		37.57	0.28718					36.8186	0.35876					36.2406	0.3228		33.5818	0.25945					45.951	0.20475					32.7148	0.31969		31.7322	0.16937
														39.0728	0.29932		42.0784	0.0975					39.0728	0.31221					38.0902	0.30179		38.9572	0.30322					33.524	0.28709					40.1132	0.26886		32.5992	0.18451
														31.9056	0.23167		31.5588	0.16112					35.836	0.30027					32.657	0.21175		33.8708	0.29086					35.258	0.25619					31.79	0.24065		37.0498	0.2455
														36.2406	0.25124		41.038	0.30903					40.3444	0.31683					38.4948	0.31225		38.8994	0.22443					37.3388	0.28377					49.0144	0.33034		32.7726	0.19325
														34.102	0.26273		31.5588	0.25727					36.2406	0.21752					34.969	0.24598		34.969	0.2321					38.6104	0.22491					29.3046	0.12906		38.3792	0.3079
														37.1654	0.23089		34.6222	0.22034					34.2754	0.31007					41.7894	0.23599		34.0442	0.28983					39.882	0.30072					40.4022	0.32161		44.0436	0.28373
														38.437	0.33418		40.171	0.31214					47.107	0.30595					34.1598	0.29212		36.4718	0.32148					46.1244	0.29398					36.8764	0.29557		40.1132	0.28964
														40.749	0.31818		40.749	0.2713					32.946	0.22731					36.2984	0.25013		30.7496	0.14673					40.6334	0.2042					33.4084	0.34077		40.2866	0.25524
														37.57	0.29267		40.9802	0.30507					34.969	0.3054					33.524	0.27237		35.0846	0.20054					37.1076	0.26212					36.2984	0.30041		38.2058	0.31555
														37.0498	0.26824		39.7664	0.27623					39.8242	0.27789					38.4948	0.2557		37.5122	0.29687					32.4836	0.25474					38.6682	0.28589		34.102	0.21622
														39.015	0.30551		36.703	0.24641					31.79	0.27101					33.4662	0.30295		35.9516	0.20103					40.6912	0.30826					37.1654	0.32223		32.5992	0.24727
														39.015	0.30551		35.1424	0.34952					40.6912	0.26056					37.5122	0.27871		32.3102	0.21889					36.3562	0.2875					42.0784	0.31747		35.7782	0.19422
														40.0554	0.25883		34.2176	0.18947					33.1194	0.27281					42.194	0.29334		39.8242	0.30574					40.3444	0.33807					42.6564	0.30416		36.5874	0.28268
														36.5874	0.25136		37.5122	0.31202					39.3618	0.29153					36.8186	0.24207		37.9168	0.32403					45.4886	0.29495					35.836	0.25333		37.2232	0.2831
														36.7608	0.1831		37.3966	0.33696					30.5762	0.24064					32.5414	0.05476		31.4432	0.16131					38.726	0.2871					41.038	0.26976		38.4948	0.30442
														33.0038	0.27627		36.1828	0.29265					38.3214	0.29646					31.5588	0.16733		35.0846	0.22079					32.8304	0.2418					36.414	0.32933		35.258	0.34918
														38.2058	0.2974		35.9516	0.29635					40.8068	0.27636					27.5706	0.25806		35.0846	0.22079					29.0734	0.26747					38.5526	0.30457		29.5358	0.19206
														43.5812	0.29805		39.4774	0.21324					39.882	0.28587					36.414	0.308		33.2928	0.251					30.056	0.2712					36.703	0.27049		31.0386	0.32147
														38.4948	0.27067		33.9286	0.24092					36.8764	0.25564					33.524	0.25521		37.0498	0.30483					36.1828	0.21651					40.0554	0.30766		28.3798	0.17126
														31.3854	0.18186		36.5296	0.23902					37.1076	0.32117					28.7844	0.29933		34.7956	0.26145					32.5992	0.10051					31.3276	0.34133		31.4432	0.17374
														51.2686	0.3388		33.7552	0.22072					38.4948	0.24738					34.3332	0.145		34.0442	0.28378					36.1828	0.25162					37.57	0.29276		42.5408	0.33584
														36.5296	0.29948		35.3158	0.28779					40.9224	0.23293					36.9342	0.28798		32.368	0.2146					33.0616	0.24844					43.2922	0.30453		36.414	0.24025
														38.7838	0.2922		40.1132	0.17588					36.4718	0.30126					32.4836	0.12034		39.1884	0.38175					37.2232	0.16069					45.951	0.27365		39.4774	0.33433
														38.0324	0.23332		38.8416	0.23439					40.3444	0.32543					35.1424	0.30334		29.189	0.16317					36.0672	0.217					36.1828	0.31533		39.1306	0.29222
														31.212	0.17347		28.3798	0.18979					36.7608	0.32381					32.3102	0.26617		32.1946	0.22365					35.8938	0.2404					39.9976	0.31952		36.703	0.24148
														29.7092	0.22092		35.7782	0.29894					32.0212	0.3017					40.5756	0.30763		38.2636	0.27327					39.2462	0.29051					41.6738	0.35431		34.2754	0.16676
														37.3388	0.25646		36.9342	0.24302					41.6738	0.30832					35.547	0.2863		32.4258	0.23464					46.529	0.29317					33.3506	0.27109		45.7198	0.30139
														43.2344	0.30119		38.726	0.22108					35.4892	0.23584					35.3158	0.19872		40.4022	0.09927					34.9112	0.29582					40.8646	0.32324		37.5122	0.23971
														38.6682	0.34445		39.2462	0.29498					41.5004	0.30593					34.102	0.27783		39.015	0.28312					35.547	0.31262					39.0728	0.26204		33.4662	0.2392
														37.859	0.3267		30.634	0.20974					36.4718	0.27562					40.6912	0.31409		41.616	0.23724					39.9398	0.23367					37.57	0.33449		33.1772	0.25147
														38.4948	0.35267		32.5414	0.28018					35.6626	0.26861					40.171	0.29877		35.7204	0.31744					38.3792	0.25309					36.8764	0.28692		34.102	0.16658
														37.1076	0.29818		31.79	0.12169					38.0324	0.32298					33.6396	0.17666		34.68	0.17298					34.7378	0.30569					37.7434	0.27732		33.9864	0.22237
														36.3562	0.24287		39.3618	0.23171					37.2232	0.28469					39.6508	0.30632		36.8764	0.19478					41.0958	0.30864					35.258	0.325		36.5296	0.29772
														37.9168	0.30702		28.7266	0.2375					38.726	0.28501					36.2406	0.34132		38.148	0.30235					34.7378	0.27673					37.4544	0.31642		36.125	0.29993
														42.3096	0.20951		38.6682	0.26921					40.3444	0.30184					30.9808	0.29022		29.478	0.27063					36.5874	0.2184					43.6968	0.33589		35.7204	0.25396
														37.9746	0.33287		41.5582	0.32015					36.0094	0.29811					40.0554	0.29313		35.9516	0.20517					34.9112	0.30781					35.3158	0.26929		30.056	0.2254
														40.4022	0.28501		40.46	0.31249					38.6682	0.34536					28.322	0.29024		33.1194	0.2894					36.9342	0.31439					36.4718	0.27317		34.68	0.1996
														36.125	0.11702		35.8938	0.20796					34.391	0.33133					33.0038	0.26207		35.3736	0.14004					35.8938	0.30442					38.6682	0.3004		37.8012	0.33114
														33.3506	0.18205		32.1368	0.21733					35.4314	0.29085					35.6626	0.27239		39.015	0.23048					40.749	0.34111					44.1014	0.29915		34.1598	0.21758
														29.5936	0.31912		31.5588	0.22517					35.547	0.27567					35.0846	0.30931		30.8652	0.31524					30.4606	0.26246					45.3152	0.3091		29.1312	0.2836
														36.9342	0.28197		37.3966	0.31393					37.281	0.28595					33.2928	0.17103		36.3562	0.27912					35.6626	0.31476					40.1132	0.32797		35.3736	0.26003
														41.9628	0.31519		36.125	0.21825					37.2232	0.28666					35.3736	0.18614		37.1654	0.27125					31.3854	0.27844					38.3214	0.28013		31.501	0.30057
														42.1362	0.34834		38.0902	0.31317					31.9056	0.22899					37.1654	0.28526		33.524	0.23313					36.3562	0.22286					35.0846	0.28479		38.437	0.29338
														36.414	0.30133		35.0846	0.20662					26.8192	0.28899					32.946	0.24166		42.0784	0.2855					33.9864	0.2561					46.9336	0.30787		38.6104	0.31148
														37.9746	0.30855		39.0728	0.20211					42.8876	0.28654					35.547	0.17267		37.57	0.19965					32.7148	0.27981					37.4544	0.28372		37.3388	0.1857
														37.6856	0.24057		34.8534	0.21215					36.2984	0.24549					42.8876	0.36433		37.1654	0.24268					34.2176	0.24064					39.4774	0.3084		29.4202	0.24561
														30.8652	0.16361		40.171	0.2948					36.0094	0.30528					39.5352	0.29396		36.992	0.22988					38.0902	0.29437					37.7434	0.27703		33.9286	0.30637
														34.6222	0.2398		34.5066	0.2675					33.2928	0.19927					32.657	0.21471		32.946	0.20279					42.1362	0.31828					36.0672	0.29107		35.2002	0.26057
														32.5992	0.27757		35.4314	0.26075					40.9802	0.31306					42.2518	0.33622		32.657	0.29512					32.1368	0.22327					46.1822	0.34901		36.9342	0.25744
														40.0554	0.31912		36.8764	0.18362					30.8652	0.28083					37.9168	0.29145		36.3562	0.31296					52.6558	0.20493					35.0846	0.28412		32.8882	0.35234
														37.9168	0.31002		37.9746	0.29318					35.836	0.26854					41.8472	0.33016		31.3854	0.04701					35.8938	0.34352					38.0902	0.34218		37.9168	0.21754
														33.1194	0.22067		37.9746	0.29318					33.4084	0.30686					32.079	0.26871		35.258	0.22796					33.4084	0.27268					40.6912	0.29745		37.6278	0.1454
														38.8416	0.30729		37.1076	0.28252					36.125	0.24966					42.4252	0.34789		42.5986	0.20244					40.0554	0.31025					43.35	0.32106		36.3562	0.3034
														37.281	0.16574		33.3506	0.31016					28.9578	0.24806					36.2406	0.29315		41.4426	0.27705					38.7838	0.30103					30.4028	0.28617		32.8882	0.14365
														35.4892	0.22899		34.7956	0.30422					37.3388	0.29806					29.8248	0.195		36.2984	0.14201					35.7204	0.21024					38.5526	0.33617		38.8994	0.2604
														39.1884	0.29497		44.3904	0.30077					40.2288	0.19987					38.8416	0.32609		30.2294	0.16725					39.015	0.30135					32.946	0.29802		35.3736	0.25453
														39.1884	0.29497		37.6278	0.29144					34.969	0.2986					42.6564	0.33275		32.7148	0.17235					35.4892	0.17906					32.5992	0.23006		37.9168	0.35133
														39.6508	0.27012		41.9628	0.15444					44.1592	0.30402					35.0846	0.31522		33.5818	0.15161					32.7148	0.29618					36.3562	0.3156		32.946	0.16766
														32.8882	0.23373		31.501	0.19835					39.593	0.31647					37.9746	0.3345		33.813	0.22246					33.5818	0.30665					41.038	0.34017		37.1076	0.24281
														38.726	0.31127		26.01	0.14433					37.1076	0.32659					40.8646	0.28119		32.5414	0.21066					41.7316	0.31329					34.4488	0.24861		35.4892	0.2455
														39.304	0.3357		36.8186	0.29273					32.1946	0.29107					38.2058	0.31304		39.4774	0.2275					40.9802	0.22597					37.859	0.31947		38.9572	0.27489
														30.8652	0.20918		38.8416	0.315					34.102	0.27783					31.3854	0.25796		42.5408	0.30545					34.7956	0.22476					38.7838	0.31245		33.1194	0.29211
														31.8478	0.25952		32.0212	0.22957					32.4836	0.13498					37.6856	0.26968		35.258	0.13474					40.4022	0.27974					38.7838	0.21111		27.0504	0.12975
														34.7956	0.3149		40.2866	0.30512					29.9982	0.2807					33.1194	0.17007		37.5122	0.24046					42.2518	0.31885					39.0728	0.30078		31.4432	0.18955
														34.9112	0.22732		35.4892	0.30893					32.5992	0.25003					37.1654	0.2614		33.0038	0.25854					36.992	0.21344					37.9746	0.29616		34.7378	0.33089
														35.258	0.29511		40.4022	0.33468					35.6048	0.25627					32.079	0.1878		39.3618	0.30596					37.1076	0.18901					30.8652	0.3132		34.6222	0.23441
														40.46	0.31087		38.6104	0.31056					33.3506	0.2355					26.299	0.2407		37.6278	0.36952					35.3736	0.25884					53.8696	0.29759		34.0442	0.20847
														28.4954	0.28608		39.3618	0.30045					45.084	0.2324					33.0616	0.27759		30.056	0.19738					38.6104	0.21337					36.8764	0.31606		34.0442	0.19215
														37.57	0.31721		35.0846	0.28469					35.7204	0.27766					30.634	0.28198		40.0554	0.28255					41.4426	0.29355					31.501	0.28956		41.2692	0.30626
														44.5638	0.31047		38.437	0.3134					24.9696	0.03439					35.9516	0.32052		36.9342	0.22087					38.2636	0.31928					34.2754	0.31957		40.9224	0.29432
														33.6974	0.20311		34.391	0.30281					40.2866	0.27892					38.8416	0.3106		36.3562	0.28146					37.6856	0.30464					35.1424	0.28095		38.5526	0.2522
														32.1946	0.26629		38.3792	0.29161					38.6104	0.28428					36.703	0.36406		34.68	0.3209					31.6166	0.1771					39.882	0.30675		39.0728	0.29006
														35.2002	0.25079		35.1424	0.30341					33.1772	0.33858					36.992	0.24372		34.102	0.27702					36.703	0.22					37.0498	0.33919		34.7956	0.26483
														34.1598	0.24745		34.391	0.30702					35.9516	0.26634					38.3214	0.28147		38.6104	0.23063					38.8994	0.28889					35.1424	0.2934		41.7316	0.01969
														37.9746	0.26919		41.616	0.30707					32.4258	0.20955					39.1306	0.27051		33.524	0.15829					33.6396	0.33249					41.905	0.31717		37.6278	0.25686
														32.4258	0.23519		37.3388	0.25837					36.125	0.20767					36.125	0.29799		41.4426	0.19611					39.8242	0.30849					39.1306	0.2534		40.0554	0.29045
														38.6104	0.26404		32.7148	0.25412					46.1822	0.29375					40.2288	0.32165		31.501	0.27514					35.3736	0.17068					40.6334	0.29744		34.7378	0.22283
														32.946	0.30245		37.6856	0.29354					32.5414	0.22531					38.4948	0.30516		38.6682	0.21					35.547	0.31145					43.5234	0.31467		33.235	0.19372
														33.2928	0.22993		38.2636	0.21964					37.281	0.30011					37.7434	0.34588		37.6856	0.23587					42.8298	0.32567					41.038	0.28603		29.6514	0.21242
														32.7148	0.29404		30.4028	0.23145					43.2922	0.31489					33.6396	0.29882		34.1598	0.29881					41.4426	0.33462					35.0268	0.24452		34.0442	0.22308
														40.2866	0.34617		34.4488	0.31984					37.5122	0.28178					36.3562	0.28155		43.9858	0.1655					39.2462	0.27318					32.4836	0.3365		29.9404	0.23257
														38.0324	0.29342		30.8074	0.17799					38.0902	0.32584					31.79	0.22578		37.4544	0.29807					34.969	0.2621					31.9634	0.23384		32.5414	0.26871
														36.9342	0.31152		33.8708	0.2023					37.6856	0.14385					41.0958	0.31908		37.8012	0.28099					33.7552	0.24897					41.2114	0.29141		34.969	0.26338
														40.5756	0.30424		39.4774	0.31652					39.5352	0.30807					39.8242	0.22946		36.2406	0.19338					36.7608	0.2531					35.2002	0.19644		48.1474	0.26896
														40.9802	0.30021		36.5874	0.27038					34.0442	0.30384					44.4482	0.30132		38.148	0.29533					32.5414	0.24057					40.8646	0.30283		32.5414	0.23734
														33.8708	0.28147		37.1654	0.26369					38.9572	0.33577					38.9572	0.28539		33.0038	0.21061					40.9224	0.33323					38.148	0.30338		35.1424	0.27886
														40.1132	0.26701		41.5004	0.28814					35.7204	0.35762					34.5066	0.24619		34.3332	0.31062					32.3102	0.24007					39.9976	0.33874		34.2176	0.21383
														38.6682	0.22566		34.9112	0.22938					37.7434	0.26449					37.859	0.27977		36.1828	0.28138					40.1132	0.31408					49.419	0.31684		43.0032	0.27421
														35.7204	0.30056		31.0964	0.18117					31.9056	0.25736					34.2754	0.18602		27.3972	0.17791					37.3966	0.29771					38.6104	0.26432		34.391	0.20802
														33.7552	0.28315		33.524	0.25434					28.4954	0.22708					37.9168	0.3101		30.4028	0.23403					32.5414	0.22577					41.1536	0.33811		27.744	0.1721
														34.7956	0.2595		40.4022	0.29409					33.5818	0.16499					33.813	0.32957		35.0846	0.18578					40.1132	0.31543					32.8882	0.25397		45.2574	0.31347
														41.2692	0.28607		32.079	0.26111					34.7378	0.30709					31.501	0.2857		35.258	0.20354					30.634	0.19521					36.414	0.36571		28.9	0.16321
														31.0964	0.25922		38.6104	0.31625					35.6626	0.2578					41.2114	0.32946		29.478	0.24692					38.3214	0.28					45.4308	0.30682		35.1424	0.19715
														45.0262	0.33438		33.4084	0.27815					38.2636	0.27561					34.4488	0.29774		39.9976	0.26276					34.2754	0.26957					38.2058	0.30711		35.836	0.25502
														39.7664	0.28313		34.102	0.33529					33.1772	0.29279					30.5184	0.23962		36.414	0.20049					34.7378	0.30051					32.1368	0.21419		39.304	0.31138
														35.1424	0.31818		31.6744	0.1928					35.4314	0.18172					35.3158	0.33201		30.1138	0.19637					38.6682	0.29953					44.8528	0.34469		31.2698	0.19959
														43.928	0.28248		30.4606	0.11639					41.038	0.30776					36.5296	0.29075		37.57	0.30971					36.125	0.23934					36.992	0.23027		28.3798	0.19034
														38.9572	0.34121		33.5818	0.29638					30.2294	0.08427					42.194	0.25374		34.3332	0.2592					33.6974	0.31413					33.9286	0.29299		33.524	0.10859
														34.4488	0.18701		29.189	0.17113					35.7204	0.34656					38.726	0.31755		39.3618	0.31202					42.3096	0.30153					39.2462	0.25096		34.5644	0.22284
														36.125	0.32172		35.0846	0.31951					32.7726	0.11223					29.6514	0.12839		33.3506	0.07544					34.7956	0.23337					36.2984	0.317		38.4948	0.32342
														40.2866	0.29822		29.5936	0.1856					41.4426	0.26032					35.258	0.27039		33.6974	0.28914					38.0324	0.32007					41.7316	0.23359		39.4196	0.30318
														37.4544	0.30519		32.8304	0.30841					42.2518	0.31642					36.3562	0.31581		42.0784	0.2844					34.4488	0.20039					39.4196	0.27633		36.7608	0.28423
														32.7726	0.26752		37.859	0.29605					45.951	0.32367					35.547	0.31131		33.2928	0.18827					41.2114	0.27191					34.2754	0.30636		42.0784	0.28659
														35.4892	0.30157		38.6104	0.27435					41.616	0.27702					38.6682	0.28044		33.8708	0.18013					43.639	0.30559					39.8242	0.33908		33.235	0.17773
														42.194	0.32013		35.0846	0.2715					35.8938	0.26841					36.5296	0.26429		37.6856	0.32515					34.102	0.24419					38.8416	0.30442		36.6452	0.28825
														39.1884	0.29377		32.8304	0.28355					29.5936	0.10082					36.2406	0.35519		35.1424	0.29003					41.5004	0.29305					41.8472	0.31935		34.68	0.24243
														33.0616	0.28358		41.038	0.18189					30.5762	0.21867					35.836	0.2833		37.4544	0.23379					35.0846	0.30202					36.5874	0.30155		33.2928	0.18063
														33.524	0.25551		36.0094	0.25368					37.8012	0.28806					40.6912	0.34506		34.3332	0.32226					39.7664	0.22259					36.0672	0.25611		33.813	0.22258
														34.7378	0.23776		32.946	0.1544					37.9746	0.18857					38.2058	0.30146		33.6974	0.08423					36.1828	0.22532					39.8242	0.33679		36.4718	0.18599
														34.6222	0.28026		46.2978	0.32902					53.754	0.25522					40.46	0.30379		38.8994	0.29506					39.9976	0.26748					34.9112	0.28996		36.125	0.3182
														33.813	0.24407		29.767	0.18459					32.4258	0.23299					33.5818	0.28809		37.281	0.31173					40.0554	0.33894					44.1014	0.32035		34.8534	0.31796
														39.9976	0.30483		33.9286	0.20641					37.7434	0.2974					33.813	0.32553		38.148	0.29961					36.2984	0.28988					45.7776	0.31738		30.345	0.25143
														44.7372	0.32439		33.3506	0.17924					29.767	0.26928					40.6912	0.311		41.8472	0.19038					39.015	0.31572					38.2058	0.33037		37.3388	0.27494
														34.9112	0.22675		35.9516	0.29237					35.2002	0.31498					28.9	0.08528		37.57	0.28461					37.6278	0.23615					39.1306	0.22504		37.6278	0.25611
														35.547	0.26381		37.0498	0.31675					37.9746	0.23108					37.57	0.32514		40.2866	0.29088					37.5122	0.31594					38.0324	0.30819		25.4898	0.173
														39.3618	0.29964		40.9224	0.33227					40.9224	0.22808					29.8248	0.23097		35.547	0.2463					37.9746	0.28091					37.8012	0.31414		35.2002	0.26726
														37.4544	0.3035		40.2288	0.31303					37.57	0.30406					33.5818	0.2394		30.634	0.16244					46.6446	0.30714					40.6334	0.34783		39.6508	0.29296
														39.015	0.30403		37.281	0.18788					35.4892	0.24479					40.8068	0.29634		36.0094	0.28527					38.3792	0.31098					30.634	0.21245		39.2462	0.27645
														36.5874	0.29002		32.3102	0.22804					42.8876	0.28145					33.2928	0.23171		37.859	0.19435					34.3332	0.22137					43.35	0.29232		29.0734	0.18416
														39.304	0.21278		37.3388	0.31571					26.01	0.01464					25.432	0.02051		39.5352	0.26963					32.1368	0.14081					37.8012	0.28426		33.6396	0.26593
														32.7148	0.26272		36.5874	0.32713					43.8124	0.20835					37.2232	0.32849		35.547	0.21752					53.4072	0.18145					39.2462	0.1894		41.2114	0.27683
														29.5936	0.27947		42.1362	0.2883					31.4432	0.16911					29.8248	0.29474		26.0678	0.10444					42.7142	0.26527					41.1536	0.34575		29.8826	0.21978
														35.3158	0.30227		32.4836	0.24159					38.148	0.28351					36.7608	0.3648		36.0672	0.23296					40.0554	0.28467					31.1542	0.33342		35.547	0.18112
														32.657	0.21419		35.258	0.27935					34.68	0.31453					28.7844	0.23347		38.4948	0.32421					35.3158	0.2932					42.5408	0.30322		39.5352	0.25195
														32.8882	0.29158		42.1362	0.30302					35.3158	0.31514					42.3674	0.27401		38.8994	0.31456					44.3904	0.31359					42.6564	0.28839		41.327	0.33322
														41.327	0.30274		39.1306	0.17013					36.414	0.34483					36.7608	0.26941		45.4886	0.30562					44.2748	0.2983					37.5122	0.30999		30.345	0.22981
														33.7552	0.21344		32.946	0.33489					41.327	0.28354					38.2636	0.37929		26.7614	0.0421					39.015	0.29431					38.2058	0.30169		38.0324	0.32191
														39.5352	0.28241		40.2866	0.14211					34.6222	0.21124					35.3736	0.26644		29.3046	0.03507					34.5644	0.22164					37.1076	0.32168		34.5066	0.23689
														33.0616	0.31783		44.5638	0.30177					37.6856	0.2702					41.3848	0.33526		35.836	0.2097					34.391	0.21923					39.4774	0.34939		36.7608	0.14841
														38.2058	0.27415		33.813	0.20759					32.1946	0.24481					45.4886	0.29019		27.3394	0.08895					31.212	0.32094					44.8528	0.31941		35.6048	0.23976
														36.6452	0.2748		33.6974	0.29405					41.7316	0.32015					39.882	0.30573		38.3792	0.1733					34.102	0.26566					38.2636	0.32126		35.1424	0.19691
														35.8938	0.32685		36.0094	0.28624					41.5582	0.22005					37.2232	0.16553		36.703	0.31978					41.905	0.27132					36.0672	0.30968		35.1424	0.23716
														37.9168	0.3492		30.345	0.21272					43.061	0.30584					35.3736	0.24351		30.056	0.1017					34.2176	0.25354					41.3848	0.32164		30.923	0.28444
														47.2226	0.30179		41.5004	0.24825					36.5296	0.28559					39.4774	0.30653		36.1828	0.23765					36.2406	0.26892					36.5874	0.26682		37.0498	0.28293
														37.0498	0.28607		31.2698	0.2003					32.7726	0.32153					30.8652	0.21667		44.9106	0.32116					36.1828	0.28169					45.4308	0.32482		33.5818	0.15506
														34.102	0.18341		34.0442	0.24674					34.4488	0.20133					45.084	0.32108		33.1772	0.21064					36.992	0.2405					46.0666	0.32282		43.7546	0.29253
														35.2002	0.2138		38.3214	0.16685					36.125	0.20447					36.414	0.31789		37.3388	0.23068					35.0846	0.32655					36.6452	0.31111		44.7372	0.28894
														31.6166	0.29666		34.7378	0.21585					40.3444	0.31096					38.4948	0.29131		28.3798	0.09841					36.2984	0.14587					43.1188	0.34762		38.5526	0.28817
														31.6166	0.16261		41.9628	0.27554					35.3736	0.29283					38.8416	0.19661		26.6458	0.17435					40.9224	0.28815					36.8764	0.33323		38.0324	0.29533
														38.5526	0.2618		35.4314	0.17018					38.0902	0.30563					36.0094	0.32359		36.5874	0.19367					31.5588	0.31834					41.327	0.34668		24.565	0.03181
														37.5122	0.26694		35.4314	0.17018					34.0442	0.30074					41.616	0.31516		32.8304	0.22851					30.056	0.26054					39.0728	0.33216		27.455	0.14295
														34.102	0.29903		30.4028	0.21711					30.8074	0.3271					38.0324	0.29077		35.547	0.28003					32.368	0.30419					39.4774	0.29137		32.1946	0.12578
														37.3388	0.32082		35.0268	0.25933					30.8074	0.28043					41.038	0.28406		33.524	0.26599					35.6626	0.28448					39.015	0.28124		32.2524	0.15261
														37.4544	0.29212		36.0094	0.25098					38.437	0.2916					35.8938	0.20099		36.1828	0.26649					39.7664	0.36209					44.2748	0.2759		41.3848	0.32039
														32.079	0.30161		31.6166	0.19578					38.437	0.3376					37.57	0.36182		35.9516	0.27514					38.2058	0.24406					37.859	0.28995		47.6272	0.10113
														37.5122	0.32361		36.8186	0.25133					30.6918	0.19566					38.6682	0.2824		33.6396	0.25338					34.2176	0.29384					38.2058	0.23908		30.2872	0.1725
														35.7204	0.22347		34.7956	0.26995					39.7664	0.30536					29.6514	0.22842		39.4196	0.2987					34.0442	0.28421					34.2176	0.33312		31.3276	0.21184
														38.726	0.29914		53.4072	0.32424					38.3214	0.34802					41.038	0.30542		37.2232	0.3265					32.657	0.23287					46.818	0.31971		36.8186	0.28084
														37.0498	0.30299		36.703	0.24848					37.4544	0.28403					36.0672	0.16016		31.7322	0.27727					32.3102	0.22367					43.6968	0.34892		41.5582	0.23435
														36.9342	0.29657		41.038	0.30221					36.2406	0.3351					43.4656	0.33309		31.0386	0.23322					31.5588	0.19354					37.859	0.30767		39.304	0.29444
														42.194	0.31687		33.0616	0.27645					42.8298	0.32224					30.4606	0.13642		34.5066	0.24177					31.2698	0.05422					31.6744	0.32608		34.9112	0.21005
														32.657	0.30928		40.3444	0.29485					34.102	0.29845					30.056	0.29331		38.3214	0.30819					34.4488	0.30146					36.3562	0.33396		48.841	0.10345
														49.3034	0.26246		35.2002	0.31962					37.0498	0.22401					40.46	0.32678		36.3562	0.28207					34.6222	0.19799					33.813	0.23586		34.969	0.19693
														33.3506	0.21062		38.148	0.26647					42.5408	0.31994					37.5122	0.26562		34.9112	0.32026					35.4314	0.22708					35.4892	0.29906		38.726	0.27567
														34.7378	0.29798		36.5296	0.18562					38.3792	0.32401					34.5644	0.25971		39.882	0.30817					39.4196	0.35827					39.9398	0.29827		46.3556	0.23645
														36.2984	0.31142		36.992	0.28502					30.056	0.0971					35.8938	0.31163		29.8248	0.25345					53.5228	0.27968					31.5588	0.27602		35.4892	0.20268
														36.125	0.23376		29.1312	0.29947					34.102	0.2938					38.8416	0.25722		27.9174	0.18963					53.5806	0.26403					36.0672	0.23426		38.9572	0.19109
														34.391	0.16727		29.0734	0.16368					33.235	0.24052					36.8186	0.287		33.2928	0.26951					35.547	0.32998					41.5004	0.31534		34.2754	0.22273
														29.7092	0.10224		36.8186	0.21542					39.1306	0.31335					37.6278	0.33828		38.8994	0.30049					31.3276	0.17377					37.9746	0.28791		38.8994	0.13771
														37.1654	0.22622		36.1828	0.33326					35.7204	0.20452					35.547	0.35064		34.0442	0.20039					37.3966	0.34868					37.1076	0.28818		36.414	0.1848
														44.2748	0.30409		34.0442	0.15129					38.4948	0.2849					35.0268	0.29237		31.501	0.22295					37.9746	0.29433					37.1076	0.25251		34.9112	0.13751
														36.7608	0.21926		37.2232	0.31615					37.4544	0.31842					31.501	0.19135		33.9864	0.17744					37.2232	0.13349					39.7664	0.30814		33.6974	0.26277
														37.8012	0.21333		40.9802	0.31117					35.258	0.27541					38.0902	0.29404		31.9634	0.27554					43.6968	0.26857					31.79	0.23543		43.1188	0.26389
														40.6912	0.32746		32.1368	0.16394					35.0268	0.24116					47.107	0.3183		36.703	0.26489					35.7782	0.22635					36.1828	0.26094		38.8994	0.27151
														31.5588	0.30213		37.3966	0.29982					41.616	0.28821					30.2294	0.33266		36.5296	0.25152					36.8186	0.20066					36.0672	0.29649		32.368	0.18039
														42.9454	0.28397		36.414	0.29534					40.8068	0.29625					37.2232	0.23972		33.1772	0.28573					33.1772	0.31657					35.1424	0.33546		33.1772	0.19859
														37.1654	0.32541		39.7086	0.3112					37.9168	0.32681					36.5296	0.28615		33.1772	0.24297					32.8882	0.22995					32.1946	0.33057		30.8074	0.23615
														34.2754	0.25014		33.1772	0.18064					30.5762	0.24577					36.703	0.25818		52.5402	0.19037					34.6222	0.21676					31.4432	0.11629		37.1076	0.34207
														37.1654	0.29291		36.6452	0.28843					36.1828	0.30372					34.5644	0.2874		34.969	0.1799					36.0672	0.29442					36.703	0.30445		45.373	0.2257
														32.946	0.29162		38.3792	0.24401					36.8764	0.32609					34.7956	0.2864		39.7664	0.27852					32.5992	0.19363					38.2636	0.29285		34.102	0.30609
														33.1194	0.21143		35.9516	0.225					34.3332	0.31211					42.7142	0.28782		35.0846	0.28682					32.5992	0.19363					39.015	0.34451		34.7378	0.34666
														39.4774	0.29845		33.0616	0.06779					42.483	0.31435					34.969	0.30156		37.1654	0.28882					36.992	0.29395					41.2114	0.31711		39.015	0.175
														35.0846	0.31365		38.3214	0.2307					33.8708	0.28504					33.7552	0.30061		36.3562	0.25347					31.212	0.11986					34.5644	0.28024		34.7956	0.24465
														42.5986	0.28982		34.969	0.28852					35.1424	0.08064					36.8186	0.22085		35.8938	0.35554					31.7322	0.2548					33.4084	0.30499		37.1076	0.28555
														33.9286	0.20292		36.5296	0.29773					33.8708	0.23606					39.4774	0.33738		36.4718	0.28215					36.3562	0.26303					39.9976	0.31663		31.9634	0.29147
														34.3332	0.25668		34.9112	0.30788					40.2288	0.30952					43.2344	0.36089		47.0492	0.3216					41.2692	0.26948					42.0206	0.30256		43.2922	0.30076
														32.4258	0.28216		37.859	0.17949					43.8124	0.21005					36.5296	0.27427		33.3506	0.28301					30.634	0.25587					42.1362	0.33703		41.5582	0.30237
														34.0442	0.31478		36.0094	0.29381					37.7434	0.25177					43.4078	0.29833		37.281	0.31656					34.969	0.25698					28.7266	0.16667		31.212	0.22297
														37.3388	0.30409		32.7148	0.21817					32.7148	0.26105					37.281	0.33215		32.1946	0.23234					35.6048	0.2816					38.4948	0.32232		35.7204	0.28731
														39.015	0.31531		40.0554	0.29722					36.5296	0.32646					41.2114	0.29		35.7204	0.21736					32.0212	0.23775					44.2748	0.30337		32.1946	0.16347
														35.0846	0.25676		35.7782	0.32914					34.9112	0.26355					35.836	0.31495		41.4426	0.26066					31.9056	0.32635					39.7664	0.35207		40.2866	0.30418
														34.2176	0.20298		28.5532	0.18958					38.726	0.28027					40.4022	0.31093		39.5352	0.21183					34.7378	0.30717					42.0784	0.30758		32.3102	0.26034
														35.9516	0.24948		38.4948	0.32543					37.4544	0.2809					35.3736	0.20618		32.5414	0.16041					32.3102	0.24143					42.0206	0.32373		40.2866	0.34155
														33.235	0.27416		38.148	0.22504					39.593	0.30915					37.0498	0.29969		40.6912	0.32533					39.1306	0.29733					39.2462	0.29328		32.1946	0.17535
														33.5818	0.2958		40.9224	0.31298					34.1598	0.28295					26.9348	0.24757		31.9056	0.23289					37.0498	0.25814					40.1132	0.32285		39.015	0.30163
														40.749	0.31171		41.5004	0.18182					29.1312	0.23168					28.033	0.29108		25.9522	0.27799					34.3332	0.26541					44.5638	0.32413		36.1828	0.19788
														33.1772	0.24131		39.9398	0.23641					38.437	0.17235					39.2462	0.32509		38.726	0.28543					36.4718	0.16148					47.3382	0.32217		30.2872	0.17057
														41.327	0.29545		33.7552	0.30568					38.8416	0.26527					25.9522	0.19469		52.9448	0.2968					36.992	0.24282					41.7316	0.35537		31.501	0.1777
														37.859	0.27286		39.9976	0.16154					35.7204	0.38237					39.593	0.30136		35.9516	0.21961					40.9802	0.28775					39.3618	0.28797		30.634	0.0277
														38.3214	0.31711		34.102	0.23225					35.4892	0.34264					38.9572	0.26381		34.3332	0.22212					39.882	0.31822					35.6626	0.31812		35.8938	0.28875
														39.9976	0.27406		31.79	0.29299					34.969	0.27494					31.5588	0.29327		42.6564	0.32022					36.992	0.1536					28.4954	0.18932		33.6396	0.28823
														38.0324	0.33572		33.5818	0.23312					33.5818	0.27952					30.634	0.21977		31.0964	0.32038					36.125	0.1559					40.3444	0.36578		44.3904	0.24806
														38.437	0.30064		45.8354	0.30329					35.7204	0.31146					33.9864	0.24256		40.1132	0.27264					37.3388	0.21934					37.6856	0.34155		35.6626	0.1513
														40.171	0.30451		32.3102	0.27933					42.483	0.30216					41.616	0.31799		29.0156	0.17665					33.3506	0.17733					39.0728	0.30033		33.0616	0.18622
														38.9572	0.32656		34.8534	0.11917					30.2294	0.26946					34.0442	0.29483		35.0846	0.204					37.9168	0.20451					40.6912	0.20184		31.6744	0.18027
														38.0324	0.29308		39.304	0.26611					40.9802	0.2962					39.4196	0.31832		36.5296	0.31018					43.1188	0.29179					39.4774	0.31825		32.1368	0.22591
														36.5296	0.22829		37.281	0.21999					34.8534	0.20082					35.2002	0.35199		40.9224	0.28592					41.905	0.27134					46.2978	0.20949		35.3736	0.20156
														41.4426	0.34408		32.8882	0.21467					38.3792	0.24954					37.5122	0.28432		27.8596	0.08551					42.3096	0.24935					41.7894	0.32835		31.8478	0.17982
														33.3506	0.25454		33.3506	0.26549					42.2518	0.32713					41.8472	0.27725		29.9404	0.06076					36.0094	0.312					41.327	0.30869		33.813	0.2169
														35.6048	0.28982		52.1934	0.31687					38.6104	0.25137					37.4544	0.31625		34.68	0.25075					39.1306	0.3123					33.0616	0.18061		29.5358	0.27831
														33.1194	0.27738		40.1132	0.32639					32.8882	0.26674					32.8882	0.31106		37.3966	0.29615					42.8298	0.31481					39.4774	0.27062		35.0268	0.21872
														40.4022	0.29768		33.5818	0.16835					32.0212	0.21727					32.1946	0.24469		35.7782	0.30033					40.5756	0.20097					41.9628	0.28746		36.414	0.29678
														39.882	0.32001		34.969	0.24856					37.0498	0.28704					38.8416	0.27407		37.5122	0.30618					33.0616	0.20371					37.6856	0.3296		37.3388	0.25092
														34.8534	0.27513		37.7434	0.30637					34.969	0.30319					37.57	0.27021		31.2698	0.14428					35.2002	0.32452					44.795	0.31696		35.836	0.30313
														35.6048	0.22819		37.3388	0.36853					36.125	0.24222					42.5986	0.31428		40.2866	0.21814					30.056	0.21054					41.0958	0.32627		44.5638	0.26504
														29.9404	0.16968		33.6974	0.25911					36.414	0.33496					32.8304	0.29476		36.6452	0.13646					39.7664	0.29249					37.4544	0.33639		36.2984	0.15028
														34.8534	0.31741		38.2058	0.31964					39.7664	0.2851					34.969	0.27791		35.0268	0.29692					33.1194	0.31412					51.8466	0.32878		39.1306	0.27642
														38.437	0.28941		35.8938	0.26332					32.0212	0.19371					38.7838	0.27562		34.8534	0.22591					35.0268	0.30511					45.5464	0.34452		36.6452	0.27425
														33.2928	0.29497		32.3102	0.25708					35.2002	0.33208					43.4078	0.28758		34.9112	0.25599					42.0784	0.29646					41.6738	0.30113		34.68	0.18552
														32.1368	0.3248		31.6166	0.12375					34.6222	0.20586					42.3674	0.29144		30.923	0.21397					41.2114	0.29762					41.9628	0.3531		32.7148	0.14198
														30.7496	0.21578		39.9398	0.1248					36.4718	0.20016					35.9516	0.31888		35.6048	0.19246					40.4022	0.31779					42.0206	0.204		32.7726	0.27769
														38.0902	0.27981		33.524	0.20215					37.6278	0.31455					39.1884	0.31309		34.5066	0.2352					35.836	0.31829					42.3096	0.32228		36.992	0.18623
														30.4028	0.28165		36.2406	0.29214					36.7608	0.30335					35.1424	0.28965		37.57	0.24975					40.46	0.19427					30.345	0.16815		31.7322	0.29934
														34.5066	0.34226		32.946	0.2692					38.6104	0.29233					35.4314	0.33343		39.1306	0.281					32.7726	0.28989					46.3556	0.27051		33.4662	0.16723
														41.2692	0.31626		37.5122	0.27023					38.0902	0.32371					32.657	0.23875		34.4488	0.3456					38.3792	0.27371					39.5352	0.33463		41.038	0.36587
														34.9112	0.28027		35.8938	0.10343					42.0784	0.3018					34.2176	0.23888		36.5296	0.20057					38.726	0.29289					35.836	0.35332		39.4196	0.25175
														35.258	0.2894		31.4432	0.17844					39.882	0.28039					33.8708	0.29888		35.8938	0.14801					36.7608	0.21421					38.8416	0.34983		35.6626	0.12454
														36.2984	0.33728		38.4948	0.27378					37.281	0.18467					41.616	0.31027		34.4488	0.22099					44.506	0.07077					35.3158	0.27804		30.2294	0.21475
														32.7726	0.16631		33.0038	0.23244					38.437	0.30483					38.9572	0.30703		39.1884	0.3204					34.5644	0.24161					40.749	0.35015		39.304	0.32519
														40.0554	0.28003		35.6048	0.29089					39.8242	0.33632					38.8416	0.33795		35.9516	0.17344					35.258	0.18878					35.4892	0.19099		38.0324	0.29467
														37.0498	0.30263		49.3034	0.31181					36.8186	0.31813					32.8304	0.28718		42.2518	0.22334					45.0262	0.06749					34.9112	0.29238		35.1424	0.19357
														34.969	0.2707		33.0038	0.2641					29.3624	0.11038					40.171	0.27967		38.5526	0.13383					31.9634	0.3004					36.3562	0.33998		33.813	0.14921
														34.5066	0.16917		33.813	0.27788					34.8534	0.31428					38.7838	0.29978		30.9808	0.32734					39.593	0.28956					39.882	0.34397		32.2524	0.28989
														41.7316	0.24763		34.68	0.22605					38.2058	0.27026					38.8994	0.2784		33.2928	0.21936					36.2406	0.23745					36.8186	0.29934		34.5644	0.15537
														33.8708	0.22944		34.102	0.19872					36.125	0.21406					36.2406	0.31592		35.3736	0.27522					35.258	0.32257					39.9976	0.29229		37.7434	0.29273
														36.9342	0.2639		35.3736	0.3148					36.7608	0.31261					41.7316	0.31432		37.5122	0.24835					35.7782	0.30981					43.639	0.27014		34.9112	0.30376
														37.5122	0.28092		37.6856	0.27934					40.6912	0.3476					28.7844	0.25406		34.8534	0.31565					39.5352	0.27796					41.327	0.29742		28.7844	0.23885
														37.4544	0.29991		32.8882	0.23651					39.2462	0.29999					30.4028	0.25463		39.304	0.30435					33.9286	0.20989					33.1194	0.18289		42.6564	0.30562
														39.304	0.30904		42.4252	0.31436					40.171	0.31061					37.9168	0.32848		29.8248	0.20892					39.4774	0.27292					48.0318	0.32049		37.5122	0.23361
														43.8124	0.29294		39.4774	0.24623					44.3904	0.26536					36.4718	0.28814		38.0324	0.33571					40.3444	0.29454					37.4544	0.2963		38.8994	0.25575
														38.2636	0.30885		33.0616	0.24789					34.0442	0.31821					30.1138	0.16738		32.2524	0.26205					38.2636	0.31922					39.5352	0.33684		36.6452	0.31117
														39.3618	0.291		30.2872	0.20388					33.7552	0.26969					34.9112	0.20657		34.5644	0.15864					34.2176	0.28473					36.8764	0.28735		31.501	0.30427
														36.2984	0.36082		33.0616	0.16087					39.7086	0.25781					38.4948	0.33044		38.5526	0.24807					33.0038	0.25192					34.2176	0.35822		36.2406	0.26094
														41.7894	0.2958		35.3736	0.21627					32.4836	0.25216					36.125	0.28634		35.258	0.29618					31.6744	0.32862					41.5582	0.32721		28.9578	0.09061
														42.2518	0.29333		36.5296	0.16827					36.5296	0.21165					34.68	0.26836		42.0206	0.30424					32.5414	0.24192					30.6918	0.19522		30.9808	0.18548
														36.6452	0.3031		41.2692	0.25398					37.6278	0.3234					35.1424	0.25225		31.4432	0.1676					35.7782	0.31264					39.1306	0.33528		43.639	0.30736
														31.6166	0.21988		34.3332	0.21397					37.9168	0.29291					36.3562	0.27476		32.8882	0.203					37.2232	0.29468					32.5992	0.25506		28.611	0.18307
														37.6278	0.33338		37.57	0.19803					38.4948	0.27702					37.4544	0.19534		30.4606	0.15594					49.4768	0.20524					34.2754	0.32227		39.593	0.35006
														39.4196	0.29559		31.501	0.23628					41.5004	0.20844					31.3276	0.28372		41.5004	0.30192					33.6396	0.24839					39.2462	0.30395		29.1312	0.19581
														38.148	0.3115		29.7092	0.19761					37.859	0.33274					40.3444	0.30551		41.038	0.31074					36.2984	0.28195					38.2058	0.33718		25.7788	0.05131
														36.4718	0.28762		41.2114	0.29842					42.194	0.35895					38.5526	0.25855		40.8646	0.32423					33.235	0.15515					35.3158	0.33269		39.2462	0.24715
														41.3848	0.30643		37.3966	0.28371					38.4948	0.24789					39.8242	0.31168		37.7434	0.22838					39.6508	0.2773					29.767	0.13147		42.483	0.2863
														37.9168	0.32377		30.056	0.26698					41.2114	0.28798					40.2866	0.30104		39.4196	0.15929					36.5296	0.25155					38.5526	0.30949		34.5066	0.30094
														37.6856	0.29879		42.5986	0.26974					33.9286	0.05491					35.0268	0.30362		33.813	0.21025					36.0094	0.28397					43.061	0.32227		29.8826	0.18199
														27.6284	0.18919		41.2114	0.29939					38.3792	0.29186					36.6452	0.33433		33.2928	0.16778					40.5756	0.3107					31.3276	0.27737		37.6856	0.31528
														39.4196	0.30583		28.5532	0.0941					38.8416	0.27249					37.1076	0.22494		28.7844	0.08537					36.2984	0.20424					43.1766	0.29518		35.9516	0.20843
														37.5122	0.29977		40.5756	0.31004					42.4252	0.33495					36.6452	0.31422		36.125	0.29719					38.437	0.26581					43.8124	0.35427		35.4314	0.20004
														34.2754	0.27718		44.9684	0.27406					33.4084	0.31725					36.414	0.32034		35.836	0.10576					33.235	0.25216					40.9224	0.29654		33.4662	0.29421
														41.5004	0.32841		36.0672	0.265					36.703	0.21601					34.5644	0.23499		33.9864	0.24725					39.1884	0.3663					40.2288	0.35098		34.2176	0.31304
														36.5296	0.30244		40.2866	0.2905					39.2462	0.27035					31.79	0.30516		41.0958	0.29753					38.8416	0.23365					36.414	0.28453		31.0964	0.22899
														38.4948	0.31488		41.4426	0.33027					22.3686	0.28865					41.327	0.2979		32.368	0.18675					31.8478	0.29128					36.414	0.28453		30.345	0.21084
														37.6278	0.30809		31.8478	0.20885					35.3736	0.25553					35.3158	0.22487		34.5644	0.31555					41.8472	0.21538					36.414	0.28453		42.7142	0.31052
														37.9746	0.28991		40.171	0.25016					38.6104	0.35063					35.836	0.20506		37.57	0.17279					36.0672	0.22526					34.7956	0.26738		35.258	0.20117
														35.0268	0.28462		32.5992	0.26468					39.593	0.23593					33.1772	0.34245		35.0846	0.12796					54.2164	0.33136					39.3618	0.20559		37.6278	0.23355
														37.1076	0.21851		38.726	0.27842					36.414	0.31401					39.7086	0.29509		34.6222	0.28516					38.2058	0.29922					34.7378	0.18001		38.9572	0.23474
														37.3388	0.3048		30.2872	0.23443					43.5234	0.28885					31.9634	0.19507		33.1772	0.17189					31.4432	0.16853					36.992	0.31434		37.9168	0.30422
														39.6508	0.25084		40.46	0.30771					31.79	0.17007					37.9746	0.28171		29.5358	0.20768					38.3792	0.30402					30.345	0.32068		32.4258	0.09084
														36.414	0.26707		35.3736	0.27449					41.6738	0.3175					41.5004	0.30937		35.258	0.1665					39.2462	0.31508					47.974	0.30372		35.4892	0.25082
														32.2524	0.17164		37.7434	0.1876					34.6222	0.27482					41.5004	0.30937		37.5122	0.30626					30.4028	0.17365					34.4488	0.26417		39.1306	0.25822
														38.2636	0.26381		29.1312	0.29456					35.1424	0.2337					37.9168	0.33212		42.5408	0.31329					35.3158	0.29234					36.8764	0.29937		36.8764	0.31585
														41.7894	0.29969		29.189	0.09296					36.3562	0.33934					38.3214	0.24996		36.7608	0.34034					34.8534	0.2121					38.726	0.25133		34.2176	0.22371
														36.9342	0.26164		45.5464	0.30364					36.5874	0.20724					37.4544	0.3364		38.4948	0.28848					39.4196	0.24022					42.6564	0.26628		27.9174	0.14389
														35.6048	0.29995		37.3966	0.14619					40.8068	0.28063					36.7608	0.28248		32.7148	0.24354					40.0554	0.29418					40.9802	0.31796		39.7086	0.26591
														35.0846	0.26575		41.9628	0.31594					44.795	0.29					39.5352	0.29914		38.6104	0.29378					32.4258	0.24102					30.345	0.24012		27.6862	0.27624
														37.6278	0.29776		34.102	0.21967					35.8938	0.20974					42.0784	0.36639		34.4488	0.27843					30.4606	0.19844					37.6856	0.26141		42.9454	0.25809
														39.593	0.27289		25.3742	0.11146					35.9516	0.33103					39.304	0.20808		34.391	0.21862					33.1194	0.31564					39.8242	0.31697		31.79	0.25173
														31.79	0.2825		38.5526	0.24802					44.4482	0.34157					39.5352	0.28842		31.3276	0.19751					41.8472	0.26659					31.3276	0.28811		38.0902	0.18933
														31.212	0.22441		32.1368	0.17417					34.8534	0.32316					33.6974	0.24632		32.657	0.24287					39.304	0.31702					39.9976	0.32147		43.1766	0.25335
														28.9	0.20464		29.4202	0.19914					33.2928	0.27825					33.1194	0.19397		32.5414	0.2254					39.9976	0.28193					42.2518	0.29595		32.8882	0.27456
														40.8068	0.29698		27.8018	0.30823					35.836	0.22332					34.5066	0.24308		30.9808	0.17795					36.8764	0.29865					31.4432	0.19903		43.061	0.19584
														40.2866	0.24351		33.8708	0.26032					38.437	0.29945					34.1598	0.31747		30.345	0.17413					30.5184	0.19854					36.6452	0.31101		34.2176	0.238
														38.5526	0.29362		37.6856	0.28148					42.194	0.31219					33.7552	0.28339		33.8708	0.25517					38.2636	0.28001					34.969	0.28147		35.8938	0.21217
														38.2636	0.29366		35.7782	0.27449					38.7838	0.34632					33.235	0.25679		36.2984	0.14445					35.2002	0.24668					34.8534	0.27549		36.7608	0.26965
														32.657	0.24496		38.148	0.24015					41.038	0.23878					32.7726	0.29588		41.2114	0.36228					36.7608	0.22858					34.969	0.26383		26.7614	0.16654
														42.0206	0.35214		40.9802	0.32504					37.57	0.31244					44.9106	0.32056		43.061	0.28144					30.1716	0.32153					54.2742	0.25577		33.6974	0.23398
														39.0728	0.38999		39.5352	0.29809					40.171	0.34646					35.8938	0.307		35.9516	0.23974					38.6104	0.318					39.4774	0.3031		34.391	0.2086
														31.4432	0.1915		31.9634	0.24119					39.1884	0.28063					33.1194	0.22245		28.8422	0.17893					30.1138	0.27153					39.4196	0.25978		35.4314	0.19284
														36.8186	0.29299		37.1076	0.24524					34.8534	0.23058					41.3848	0.30623		32.7148	0.27593					41.3848	0.2959					37.859	0.32186		37.6856	0.28314
														43.2344	0.32035		40.5178	0.16866					43.5234	0.37252					34.68	0.22315		37.9168	0.27504					29.5936	0.1865					37.1654	0.36044		33.2928	0.22615
														37.4544	0.3		25.2008	0.05292					36.6452	0.22936					37.8012	0.28251		40.0554	0.2845					33.7552	0.29831					31.0964	0.29413		39.882	0.29665
														28.7844	0.25475		35.4892	0.28743					39.3618	0.21089					37.1654	0.20985		36.5874	0.28844					40.1132	0.17076					40.1132	0.37508		37.6278	0.34612
														38.0324	0.27444		38.5526	0.28394					38.148	0.35562					33.7552	0.297		36.8186	0.29316					35.8938	0.2627					43.9858	0.31012		29.3046	0.06064
														29.478	0.26424		42.2518	0.28713					36.5874	0.33658					35.4314	0.30344		40.5178	0.29872					31.79	0.25857					37.281	0.2933		35.547	0.31781
														36.8186	0.31174		36.0672	0.2689					39.4774	0.31035					44.217	0.32498		33.6396	0.21643					37.1654	0.32019					31.2698	0.26787		29.3046	0.16697
														35.6048	0.3013		38.726	0.28336					36.5874	0.30646					37.3966	0.32157		34.5644	0.31845					33.9286	0.20816					36.3562	0.29014		39.7664	0.25547
														42.0206	0.33509		35.2002	0.32849					36.7608	0.21294					29.4202	0.21657		35.3158	0.23141					38.0324	0.32493					37.57	0.29194		40.8646	0.24883
														33.5818	0.27014		35.7782	0.24469					36.8764	0.31445					38.0902	0.24504		32.7148	0.17049					40.46	0.23423					39.1884	0.2767		33.235	0.29518
														38.0902	0.28497		34.391	0.29556					38.9572	0.242					39.4774	0.33323		35.3158	0.25263					31.4432	0.25043					35.7782	0.26455		32.7726	0.20362
														43.928	0.33433		41.9628	0.30881					31.8478	0.29612					35.2002	0.31649		36.414	0.23894					35.4314	0.31446					54.621	0.25972		34.391	0.1215
														37.6278	0.28139		44.795	0.30648					38.0324	0.2639					36.6452	0.28798		34.2754	0.28021					33.1772	0.29197					42.1362	0.36903		33.0038	0.27599
														34.2754	0.23364		39.304	0.24018					34.3332	0.19849					33.813	0.3614		30.5184	0.27313					41.038	0.28241					35.7782	0.3109		35.0846	0.31832
														42.4252	0.31564		36.7608	0.18109					36.8186	0.24622					39.7664	0.29681		32.8304	0.23168					37.859	0.30268					42.0206	0.30235		46.9914	0.34113
														34.7378	0.31499		32.5992	0.1957					37.281	0.27389					38.8994	0.32219		35.6048	0.30899					29.0734	0.18446					38.726	0.34047		36.992	0.24825
														37.4544	0.28814		31.0964	0.22624					34.8534	0.27317					46.5868	0.29208		34.1598	0.24171					35.9516	0.32253					38.3214	0.23824		38.8994	0.31206
														33.5818	0.26488		38.3792	0.20196					31.501	0.21559					37.6856	0.29377		31.212	0.27692					35.9516	0.27923					40.0554	0.31292		33.0038	0.15377
														38.8416	0.28194		32.368	0.1958					29.8826	0.19989					39.882	0.30261		30.1716	0.2952					35.7782	0.26556					38.3792	0.32434		31.2698	0.16177
														36.6452	0.33249		39.1884	0.31771					40.0554	0.29118					41.1536	0.30615		34.8534	0.04742					30.7496	0.26863					35.8938	0.36047		34.8534	0.30845
														35.2002	0.28165		34.0442	0.27468					36.2406	0.3301					34.1598	0.16394		24.854	0.1201					34.5644	0.31544					40.5756	0.31133		36.8186	0.33177
														36.6452	0.32635		35.3736	0.25429					43.7546	0.29433					33.8708	0.31679		38.8416	0.27659					34.7378	0.22684					36.6452	0.31707		36.9342	0.2511
														44.3904	0.32553		27.455	0.17602					35.3158	0.31989					39.882	0.30364		39.3618	0.30718					35.0268	0.20758					38.6682	0.3178		31.4432	0.216
														39.9976	0.33028		43.061	0.31793					39.3618	0.3484					36.0094	0.29539		35.0268	0.19664					43.9858	0.24277					36.1828	0.26144		29.3046	0.19562
														37.2232	0.34629		32.2524	0.31483					31.6166	0.30083					38.437	0.29869		33.4662	0.25802					36.703	0.26328					34.102	0.29338		43.1766	0.39509
														50.286	0.32441		39.9976	0.34726					40.8646	0.30463					41.8472	0.32617		46.0088	0.21066					41.327	0.26145					30.634	0.32387		35.6626	0.23673
														32.8304	0.20306		39.593	0.2497					36.8764	0.32657					39.304	0.32457		38.0324	0.29286					38.3792	0.30186					41.1536	0.29576		36.8764	0.29293
														37.6856	0.29664		36.3562	0.22788					34.2176	0.18958					30.056	0.25481		33.8708	0.33899					36.3562	0.19899					33.9864	0.30884		36.8764	0.37702
														38.6682	0.31812		36.4718	0.26897					33.4662	0.22544					30.1138	0.29675		34.6222	0.28159					35.6048	0.18826					35.0846	0.16996		36.992	0.18991
														40.2866	0.29353		35.6626	0.2347					36.8186	0.26269					34.7956	0.27768		32.946	0.19758					42.1362	0.28251					38.8994	0.30339		36.703	0.23381
														37.6856	0.30859		29.2468	0.09849					32.4258	0.23098					36.1828	0.30491		38.8994	0.32868					30.923	0.20035					37.6278	0.26117		36.9342	0.29352
														36.703	0.34075		35.836	0.18044					35.258	0.27372					39.015	0.29504		32.5414	0.27386					40.2288	0.31868					29.5936	0.30614		28.1486	0.18208
														38.2636	0.32761		42.7142	0.28953					35.1424	0.35953					38.6104	0.31503		37.1076	0.26872					36.703	0.35893					37.8012	0.3237		34.7956	0.24062
														36.5296	0.33041		36.6452	0.29405					37.2232	0.26662					45.084	0.36318		33.8708	0.20565					37.1654	0.24784					36.0094	0.26564		39.7664	0.32193
														37.8012	0.32145		38.0902	0.227					36.703	0.28756					33.235	0.29251		36.9342	0.0762					37.0498	0.31264					36.5296	0.26828		39.4774	0.31083
														41.7316	0.28086		41.6738	0.30848					34.102	0.22199					38.0324	0.31714		33.235	0.29269					36.0672	0.29448					41.9628	0.29792		40.0554	0.30658
														41.1536	0.31964		33.2928	0.28152					39.8242	0.29558					34.969	0.20844		36.5296	0.24579					34.7956	0.29219					37.9168	0.33525		46.6446	0.31237
														35.3736	0.18125		40.46	0.25885					31.1542	0.21877					39.882	0.30624		32.5992	0.20709					37.3388	0.26333					35.258	0.22272		32.0212	0.13548
														40.9224	0.33523		37.6278	0.24985					36.703	0.31906					40.2866	0.30168		35.2002	0.28554					36.8186	0.24416					37.0498	0.28695		37.281	0.28499
														38.4948	0.30641		42.2518	0.30057					34.5066	0.31305					45.4308	0.32313		35.3158	0.30028					37.9168	0.30279					38.4948	0.2601		38.5526	0.29287
														34.7378	0.29117		35.4314	0.22749					37.5122	0.34729					37.859	0.30664		39.0728	0.30803					31.212	0.11827					41.5582	0.33134		35.836	0.14534
														46.4712	0.32153		45.662	0.3162					39.2462	0.37994					34.2754	0.26754		30.5184	0.18094					31.7322	0.27689					42.6564	0.33531		32.2524	0.2341
														38.8994	0.28606		38.0902	0.2745					36.3562	0.33446					46.818	0.31374		33.2928	0.22488					36.414	0.29399					38.9572	0.31518		41.327	0.33611
														38.4948	0.31288		39.6508	0.31034					27.455	0.29745					31.5588	0.18677		29.0734	0.26206					33.524	0.28462					39.882	0.2816		29.189	0.30912
														37.2232	0.31749		42.5408	0.24829					31.79	0.26996					27.0504	0.22449		36.7608	0.25077					36.1828	0.23116					37.8012	0.28058		38.0324	0.33698
														37.1076	0.32087		32.8304	0.24932					39.882	0.29986					37.3388	0.2738		37.9168	0.24738					39.4196	0.28461					37.281	0.26728		36.703	0.27775
														40.171	0.33801		34.2176	0.30449					39.4774	0.29733					30.345	0.22307		32.946	0.22266					37.3966	0.31808					44.7372	0.31162		40.9224	0.2284
														36.703	0.29865		31.79	0.208					35.3736	0.28264					35.0268	0.26009		37.3966	0.06169					40.0554	0.20939					41.4426	0.31227		39.3618	0.30784
														33.4084	0.30108		39.7086	0.28597					31.3854	0.13336					40.9224	0.28955		32.1368	0.28219					32.2524	0.30763					30.8652	0.27355		40.46	0.26588
														42.7142	0.30798		31.6744	0.20069					44.5638	0.31921					37.9746	0.30055		42.4252	0.29268					32.1946	0.3407					32.5992	0.18332		34.391	0.2566
														38.148	0.27809		43.9858	0.32675					34.8534	0.32094					41.6738	0.26249		40.8068	0.2147					44.9684	0.27425					33.2928	0.33814		34.9112	0.27694
														32.3102	0.30164		37.859	0.28893					41.2114	0.26342					37.3388	0.30974		40.8068	0.2147					36.0672	0.30509					35.0268	0.25589		35.6626	0.18336
														42.2518	0.36895		42.8298	0.3016					36.4718	0.33512					40.4022	0.31999		36.5296	0.34482					38.2636	0.28674					43.928	0.32594		37.5122	0.29059
														33.9286	0.29467		40.171	0.25821					41.9628	0.32929					38.6682	0.30686		38.4948	0.26306					35.7204	0.23676					34.68	0.1699		33.6974	0.1542
														34.68	0.17719		33.1194	0.2736					35.0268	0.2172					32.0212	0.2734		29.1312	0.14212					39.7664	0.30928					30.8074	0.28869		33.3506	0.24821
														37.6856	0.28837		31.6744	0.27857					36.5874	0.2003					36.8186	0.29571		32.5414	0.21179					41.5004	0.29231					35.7204	0.29867		37.2232	0.18852
														39.593	0.29844		34.102	0.17046					38.2058	0.29925					35.3736	0.33367		40.6334	0.29964					37.5122	0.29254					40.46	0.34855		30.5184	0.27384
														36.4718	0.27854		35.3158	0.20347					32.2524	0.30174					41.9628	0.32584		33.1772	0.3229					38.5526	0.30688					39.7086	0.23191		35.3736	0.30608
														32.5414	0.18183		35.7204	0.29869					34.68	0.3319					38.2636	0.30047		35.258	0.2857					41.038	0.31549					36.125	0.25593		37.281	0.32378
														41.5004	0.30691		36.0672	0.38935					33.3506	0.24767					38.4948	0.33529		36.4718	0.35948					33.6396	0.14301					43.7546	0.31716		40.749	0.3229
														34.68	0.23221		35.836	0.29465					36.5874	0.27944					39.4196	0.27956		36.1828	0.27208					36.8764	0.30396					45.8354	0.31764		32.079	0.28409
														37.1654	0.33437		34.7956	0.17676					38.6682	0.29965					39.9976	0.2957		27.5128	0.13184					36.6452	0.30012					35.547	0.3289		34.6222	0.21114
														35.7204	0.2677		31.0964	0.18725					39.015	0.27589					41.038	0.30656		36.5296	0.22068					38.8994	0.31432					36.414	0.32295		36.5874	0.20667
														40.4022	0.35239		51.7888	0.22973					35.4314	0.32745					39.2462	0.29236		33.4662	0.25937					31.0386	0.27801					35.547	0.22494		32.5992	0.24947
														39.1884	0.28902		39.3618	0.19682					38.2636	0.15904					34.5644	0.2649		33.0038	0.29075					31.9634	0.17005					37.6278	0.34542		40.3444	0.26513
														36.414	0.28089		36.0094	0.26893					36.3562	0.21864					35.4314	0.31091		39.8242	0.28895					32.3102	0.26593					37.6856	0.32202		34.6222	0.25342
														41.327	0.31848		42.3674	0.29049					43.1188	0.33658					34.7956	0.23767		52.4246	0.31938					40.4022	0.31282					36.703	0.327		33.2928	0.20996
														51.2686	0.28511		33.9864	0.23745					41.5582	0.27435					36.8186	0.29286		34.6222	0.17413					39.1884	0.29461					31.9056	0.3033		33.6974	0.23837
														33.2928	0.28181		33.524	0.24512					34.7378	0.22774					33.235	0.34624		32.079	0.28966					41.6738	0.28317					44.1592	0.27458		33.6974	0.3027
														36.3562	0.3126		32.946	0.21772					30.345	0.32501					42.3096	0.28204		38.9572	0.18171					36.5874	0.31082					32.5414	0.16082		35.547	0.2463
														40.749	0.35171		37.8012	0.28092					36.0094	0.31597					38.7838	0.3236		26.299	0.18593					35.3736	0.24638					41.5004	0.31832		35.7782	0.2393
														39.1884	0.30651		40.2866	0.33059					37.3966	0.28942					40.171	0.3039		41.7316	0.24256					35.0846	0.27997					42.5986	0.30472		34.1598	0.2922
														38.9572	0.31946		37.4544	0.27949					34.5066	0.25107					35.9516	0.29435		39.304	0.25467					35.258	0.33962					34.7956	0.1665		35.836	0.20111
														31.501	0.18822		35.9516	0.26559					36.2406	0.31228					36.5874	0.20366		34.2176	0.2685					42.3674	0.33427					43.4078	0.33783		39.7664	0.33123
														38.3792	0.19009		38.8416	0.26662					30.345	0.19855					45.0262	0.32558		36.0672	0.32957					43.6968	0.27742					40.1132	0.21414		41.905	0.29094
														30.923	0.19654		30.2872	0.08834					38.2058	0.29097					32.4836	0.28469		31.5588	0.22218					29.8826	0.12208					38.2636	0.34131		54.5054	0.17837
														39.304	0.31769		39.5352	0.30057					38.2058	0.29097					49.6502	0.25865		26.1834	0.13023					33.524	0.25955					32.1946	0.21648		29.0156	0.19459
														30.9808	0.27508		39.015	0.29653					32.1946	0.28471					37.3388	0.30548		34.7956	0.21702					34.4488	0.1404					35.836	0.21051		29.6514	0.27464
														34.969	0.32692		28.8422	0.16935					37.8012	0.32434					40.5178	0.3398		37.3388	0.31649					35.6048	0.26078					35.8938	0.30633		35.8938	0.27385
														32.0212	0.24681		36.5874	0.33484					42.2518	0.2649					31.3854	0.14531		33.3506	0.19768					31.3276	0.22459					42.3674	0.32105		34.969	0.27395
														36.125	0.27215		38.6682	0.27209					38.6682	0.33588					39.8242	0.30176		33.8708	0.22999					32.8304	0.17484					43.8702	0.32453		37.7434	0.24126
														32.946	0.34755		36.414	0.2626					39.4774	0.32653					33.7552	0.24316		36.703	0.27024					33.6974	0.23881					39.8242	0.28248		35.7782	0.24832
														38.726	0.32013		41.4426	0.29506					41.327	0.30624					34.2176	0.281		36.4718	0.23916					33.4084	0.32469					38.8416	0.32655		36.125	0.2163
														35.0846	0.30452		33.1772	0.27638					38.4948	0.24772					33.6974	0.21365		30.634	0.10579					34.102	0.22424					36.6452	0.30072		32.8882	0.18815
														35.547	0.25066		36.125	0.29259					32.0212	0.23883					39.4196	0.26157		34.8534	0.2871					28.033	0.15015					34.0442	0.29593		32.4836	0.2658
														39.9398	0.30858		40.46	0.28734					36.3562	0.30812					37.3966	0.31029		35.0268	0.35691					52.309	0.32227					43.4078	0.28901		33.813	0.32165
														39.3618	0.30828		32.2524	0.21187					35.0846	0.23846					31.79	0.28919		33.3506	0.30134					35.7204	0.21408					33.235	0.28809		32.5414	0.19968
														33.5818	0.22754		35.6626	0.20363					33.235	0.21979					36.4718	0.30578		39.304	0.29464					43.928	0.2893					43.2344	0.33794		36.992	0.30888
														36.6452	0.3365		27.8018	0.12983					33.7552	0.21012					21.386	0.13151		31.9634	0.23424					31.501	0.17495					35.8938	0.36763		31.9056	0.14764
														41.327	0.29357		27.8018	0.12983					37.6856	0.1938					37.9168	0.26438		40.3444	0.03242					34.1598	0.19416					35.4892	0.30508		29.1312	0.11565
														40.6334	0.28841		36.992	0.22028					30.634	0.19554					41.038	0.30822		32.1946	0.25334					35.2002	0.29505					37.3966	0.29816		35.7204	0.28451
														33.1772	0.24758		38.6682	0.22518					41.327	0.31035					35.6626	0.28404		40.4022	0.32847					36.0672	0.26779					37.9168	0.20367		35.7782	0.29439
														35.7204	0.28566		35.0268	0.27826					36.1828	0.2673					41.1536	0.29166		33.1194	0.2052					38.2636	0.29337					38.9572	0.33241		31.6744	0.23694
														38.6682	0.28404		37.5122	0.22863					32.1946	0.19098					43.6968	0.35031		35.0268	0.1951					32.8882	0.27431					40.8068	0.32385		32.0212	0.06725
														28.5532	0.22548		38.0324	0.18926					43.1766	0.31204					35.2002	0.29622		28.322	0.04035					35.547	0.30236					37.3388	0.26875		38.4948	0.2892
														35.3736	0.33204		40.3444	0.31221					34.7956	0.22755					41.616	0.28466		43.2344	0.29293					32.8882	0.17708					32.5414	0.1939		33.9286	0.27618
														36.5874	0.23784		36.703	0.14395					34.6222	0.28485					44.1014	0.27585		39.7664	0.29605					40.9802	0.24793					40.6912	0.33419		32.7726	0.17037
														39.8242	0.3163		39.1306	0.34516					37.9168	0.28216					39.2462	0.29936		35.2002	0.23451					37.6856	0.31474					36.414	0.29051		38.6104	0.22858
														34.7378	0.25964		35.9516	0.28833					40.171	0.31923					31.501	0.08807		37.8012	0.30459					43.4656	0.34029					29.8826	0.23465		32.946	0.27975
														34.391	0.26742		37.7434	0.28451					42.2518	0.32896					38.0902	0.29877		35.0846	0.27373					43.9858	0.3462					32.946	0.30045		43.8124	0.29564
														34.6222	0.3048		39.304	0.28255					39.1306	0.3131					40.8646	0.2977		35.0268	0.2129					40.4022	0.28365					37.6856	0.36885		36.3562	0.26609
														32.5414	0.23498		33.7552	0.27181					31.9634	0.23165					38.0902	0.30173		36.992	0.32414					43.1188	0.18841					36.4718	0.21785		35.8938	0.26549
														36.414	0.29583		34.7378	0.2937					39.1884	0.24375					36.9342	0.22859		41.1536	0.27299					32.1368	0.26112					38.7838	0.34979		48.263	0.26252
														35.6048	0.27525		41.4426	0.23023					29.8248	0.31853					29.8826	0.11625		35.2002	0.23368					35.547	0.14119					34.391	0.29265		38.7838	0.3403
														36.992	0.29861		38.6682	0.30032					34.2754	0.25978					36.0672	0.25304		39.3618	0.30511					35.2002	0.30394					42.483	0.31355		42.2518	0.26329
														36.703	0.30263		30.634	0.22762					36.992	0.30461					33.4662	0.22887		32.8882	0.27603					43.4656	0.29387					37.4544	0.39324		33.5818	0.29532
														40.8068	0.28758		36.0672	0.23171					31.3854	0.14333					31.7322	0.30049		39.1306	0.30807					34.391	0.19662					41.9628	0.26763		35.4314	0.07002
														37.1654	0.26947		34.5644	0.25054					33.4084	0.07285					35.7204	0.30009		34.8534	0.30122					40.9802	0.29075					34.969	0.26715		43.1188	0.33054
														31.9634	0.06062		47.2226	0.27056					41.038	0.28846					38.8994	0.30576		33.9286	0.24313					40.6334	0.29516					40.8068	0.33303		32.1946	0.2361
														41.327	0.32161		35.0268	0.20574					33.8708	0.27134					40.8646	0.29502		35.547	0.31172					31.6166	0.25772					39.593	0.32723		42.772	0.33343
														40.749	0.29411		45.1418	0.28241					31.212	0.20815					37.57	0.30944		30.4028	0.25786					37.9168	0.30553					39.593	0.29446		38.9572	0.28589
														43.0032	0.28222		32.2524	0.13074					38.0324	0.24982					38.9572	0.30156		43.1188	0.29999					34.5066	0.2496					31.9634	0.17754		34.6222	0.09089
														31.3854	0.2092		39.4774	0.19608					38.6682	0.31508					36.1828	0.31921		36.8764	0.29492					38.0902	0.2495					37.1654	0.32264		40.1132	0.30406
														39.593	0.29306		28.8422	0.08818					27.8018	0.26196					50.8062	0.2537		37.8012	0.24472					39.8242	0.22576					36.0672	0.26116		28.8422	0.23038
														33.0038	0.36099		36.9342	0.28686					43.928	0.28412					32.4258	0.16912		34.5644	0.27759					41.4426	0.30013					39.7086	0.3901		27.9174	0.04361
														42.0784	0.32026		34.391	0.24511					35.2002	0.32418					44.506	0.30758		36.8764	0.23155					34.2176	0.2883					34.2754	0.16568		29.6514	0.16117
														37.5122	0.29327		37.6278	0.28319					34.3332	0.328					31.2698	0.24789		36.3562	0.20697					31.0386	0.18741					35.0846	0.32036		26.299	0.11763
														51.6732	0.27515		43.6968	0.31139					31.6744	0.20887					42.8876	0.35554		32.8304	0.15144					35.4892	0.24854					37.4544	0.26657		36.4718	0.26795
														33.813	0.24555		39.304	0.31222					34.391	0.28874					39.9398	0.24312		33.4084	0.16901					33.2928	0.29954					37.281	0.29157		40.3444	0.24625
														40.3444	0.33751		36.125	0.30642					37.6856	0.29401					42.8298	0.28401		31.0386	0.18504					33.813	0.30233					30.2294	0.25445		40.3444	0.31424
														35.0846	0.30384		36.1828	0.28016					49.6502	0.34587					38.0324	0.27993		32.5414	0.23129					36.4718	0.28798					26.3568	0.23275		33.1194	0.23345
														32.5414	0.25288		42.1362	0.18226					37.9746	0.21813					39.882	0.35844		29.5358	0.09712					34.2754	0.2624					33.0616	0.18099		33.235	0.14588
														39.304	0.30611		34.7956	0.26825					36.414	0.27794					38.6104	0.24204		32.946	0.20291					36.4718	0.26239					43.5812	0.34122		35.3158	0.18973
														33.1772	0.26991		33.1194	0.28573					39.882	0.28432					34.969	0.29224		37.859	0.30862					34.9112	0.31165					34.8534	0.29931		33.4662	0.15119
														34.0442	0.30682		31.3276	0.19112					33.8708	0.33763					36.9342	0.27004		36.9342	0.2716					39.882	0.28456					37.281	0.27611		33.9864	0.21612
														37.2232	0.30745		39.882	0.30145					40.9224	0.26549					39.9398	0.33358		36.8186	0.21727					34.7378	0.30048					29.478	0.2038		34.7956	0.33023
														34.0442	0.20101		36.4718	0.30274					30.4606	0.19986					37.2232	0.26018		30.634	0.19316					35.2002	0.18161					34.391	0.26728		35.7204	0.30097
														39.7664	0.31534		37.2232	0.1954					31.6744	0.30015					33.1194	0.27398		33.524	0.28826					32.2524	0.28619					37.8012	0.29127		50.2282	0.21654
														37.3388	0.30944		35.0846	0.24792					42.0206	0.31706					44.6216	0.32387		38.0902	0.08203					39.882	0.26826					39.7664	0.30404		50.2282	0.21654
														41.905	0.31402		34.0442	0.27736					36.6452	0.23825					32.657	0.3283		28.4376	0.1812					36.0672	0.1597					40.8068	0.29684		34.3332	0.19367
														38.6682	0.32421		34.102	0.28608					42.5986	0.32002					38.3792	0.28505		35.4892	0.27975					38.2636	0.31517					38.8994	0.2997		37.0498	0.20459
														40.749	0.32846		31.9634	0.14924					32.7726	0.25152					34.8534	0.27952		31.212	0.18362					34.102	0.29202					36.5874	0.28362		40.9802	0.32095
														34.0442	0.20256		31.212	0.24423					40.2866	0.19414					37.1654	0.27917		27.166	0.05653					35.7782	0.17044					33.4662	0.30146		30.056	0.20474
														43.639	0.33054		40.8646	0.28366					36.125	0.31312					32.079	0.29163		36.9342	0.27368					37.8012	0.31049					33.1772	0.30172		39.3618	0.30014
														34.7378	0.3026		38.4948	0.30979					44.217	0.33176					35.6048	0.24148		33.8708	0.17304					35.3158	0.29086					25.0274	0.16628		39.0728	0.31589
														35.1424	0.25225		39.882	0.19956					33.4084	0.18731					40.5756	0.32493		37.57	0.3108					34.5644	0.21406					34.8534	0.28707		30.1138	0.17819
														37.281	0.28366		30.345	0.15162					37.1076	0.26327					37.3966	0.31575		33.2928	0.22672					26.9926	0.23349					36.5296	0.24961		36.9342	0.25653
														33.3506	0.18133		38.7838	0.20288					36.0094	0.29692					39.6508	0.28386		38.6682	0.2489					35.4892	0.28469					33.235	0.23257		42.3096	0.21826
														37.9168	0.30869		32.5992	0.25503					34.68	0.3226					39.3618	0.30017		40.6912	0.30602					35.3158	0.2485					32.657	0.34691		38.8994	0.22316
														37.6278	0.3016		35.7782	0.28641					39.4774	0.34447					32.079	0.29259		40.1132	0.30367					35.6626	0.17487					36.8186	0.25988		29.9404	0.21894
														39.6508	0.36761		44.1014	0.33138					38.6682	0.34058					32.7726	0.17929		29.3046	0.18031					36.703	0.16494					33.235	0.25867		40.1132	0.28128
														42.7142	0.33623		39.9398	0.24116					36.125	0.17599					33.3506	0.25566		37.7434	0.13693					34.391	0.2719					41.7316	0.36152		32.2524	0.19717
														43.9858	0.31049		38.7838	0.297					36.0672	0.17143					31.0964	0.19192		38.2058	0.04966					36.5296	0.2306					40.5756	0.31669		37.5122	0.32238
														35.1424	0.33509		35.6626	0.20271					37.4544	0.38023					43.7546	0.33809		30.1138	0.24206					36.5874	0.19062					42.5408	0.30618		40.6334	0.31686
														43.639	0.30504		31.0964	0.22769					37.57	0.30113					26.7614	0.09465		40.0554	0.28027					38.437	0.28997					39.8242	0.30788		45.2574	0.25753
														36.703	0.29252		39.882	0.16255					43.2922	0.27863					33.1772	0.20101		38.6682	0.29188					42.3674	0.30061					37.2232	0.20164		42.2518	0.3426
														34.102	0.25246		33.9286	0.29602					39.7086	0.29827					36.3562	0.23067		31.3276	0.18377					37.281	0.30186					36.703	0.24292		33.235	0.19398
														34.4488	0.30335		36.8764	0.19969					31.6744	0.208					34.3332	0.18956		42.8298	0.2125					35.9516	0.1598					40.3444	0.25628		33.6396	0.26376
														38.5526	0.29192		37.7434	0.18857					36.414	0.26608					37.281	0.22835		34.6222	0.28933					40.749	0.3269					39.4774	0.32961		32.079	0.30137
														34.4488	0.24226		32.3102	0.26982					36.4718	0.33269					30.634	0.21081		38.0902	0.20024					36.414	0.27391					33.9286	0.22174		32.657	0.01704
														35.6626	0.22653		33.2928	0.23909					50.4016	0.18146					36.9342	0.24595		28.322	0.31974					34.4488	0.2542					41.2692	0.32602		37.5122	0.14838
														40.9802	0.29255		37.6278	0.29252					32.4258	0.24706					40.2866	0.30093		35.836	0.23867					41.327	0.36997					35.6048	0.26475		31.4432	0.3108
														40.9802	0.29255		47.685	0.33003					39.7086	0.31763					29.8826	0.20788		36.992	0.26657					48.3786	0.28076					45.7198	0.34187		38.5526	0.11005
														38.726	0.30089		40.2866	0.19759					35.7782	0.24787					31.2698	0.27176		44.795	0.25111					39.9976	0.22416					43.7546	0.30806		40.749	0.29867
														40.5178	0.29894		35.0268	0.26126					33.8708	0.19036					40.5756	0.28208		36.0094	0.31122					37.3388	0.31258					33.4084	0.24264		32.0212	0.25247
														30.4606	0.29905		32.4836	0.13494					41.905	0.34925					30.5762	0.22432		32.5414	0.20082					33.4662	0.2378					41.2114	0.32277		32.7726	0.18645
														41.9628	0.32477		35.3736	0.24361					44.8528	0.28632					40.2288	0.30412		35.8938	0.22017					27.5128	0.24291					36.414	0.26273		36.125	0.27876
														34.7378	0.3122		41.0958	0.28979					34.2176	0.24873					42.0206	0.29276		37.3388	0.26286					35.7782	0.3282					36.414	0.2669		48.263	0.19408
														33.6396	0.20822		33.8708	0.27181					39.7664	0.24428					46.818	0.30041		42.0206	0.28574					40.6912	0.22992					35.6626	0.32305		31.2698	0.27255
														34.8534	0.26315		34.5066	0.30755					36.2406	0.27673					37.6278	0.26586		34.969	0.08602					40.749	0.3192					45.5464	0.38596		41.0958	0.27239
														32.1368	0.16501		30.345	0.20447					39.882	0.15187					39.304	0.32371		32.8304	0.2859					43.35	0.33092					32.5414	0.3119		34.4488	0.23269
														44.6794	0.33673		41.0958	0.30214					33.4084	0.30952					39.4196	0.28672		32.657	0.22957					40.1132	0.32993					32.8304	0.13085		34.6222	0.09139
														32.8882	0.27316		30.4606	0.20651					37.4544	0.28238					34.5644	0.24867		35.1424	0.17911					31.5588	0.29346					42.0206	0.28352		41.2114	0.22604
														31.7322	0.19029		41.038	0.29913					40.46	0.35042					43.9858	0.28757		33.524	0.2277					37.3388	0.31973					40.5756	0.35219		36.9342	0.15077
														37.8012	0.27697		41.2692	0.28279					41.038	0.36284					38.2636	0.28887		30.8074	0.27289					31.4432	0.22431					33.0616	0.24199		48.841	0.26695
														36.5874	0.28908		27.1082	0.1761					40.2288	0.31861					37.3388	0.29642		38.0324	0.23844					29.3046	0.13155					33.235	0.30148		33.1194	0.263
														39.6508	0.31736		37.57	0.28904					52.02	0.29398					34.7956	0.28614		45.1996	0.2651					34.8534	0.28235					31.7322	0.25806		29.5358	0.25413
														38.2058	0.32893		37.0498	0.33052					38.437	0.3056					33.524	0.26715		36.5874	0.20633					35.2002	0.29957					35.2002	0.11375		32.8304	0.18323
														42.7142	0.29478		36.414	0.15044					38.6104	0.30599					41.8472	0.32312		31.8478	0.16003					40.2866	0.2528					37.859	0.28628		37.57	0.2585
														35.836	0.30857		35.2002	0.20381					40.46	0.27831					38.437	0.3072		31.79	0.19332					39.1884	0.31485					41.4426	0.33666		44.3904	0.27039
														34.5066	0.2936		37.57	0.31534					33.0038	0.24177					41.3848	0.3293		35.4314	0.17365					40.1132	0.23889					44.506	0.2928		32.2524	0.21848
														40.2288	0.35733		42.2518	0.23898					42.3096	0.33344					41.327	0.24325		36.6452	0.31707					34.4488	0.26972					35.6048	0.24918		32.4258	0.27114
														31.212	0.25533		32.4836	0.20954					39.9398	0.29355					36.2406	0.29567		35.2002	0.23395					38.4948	0.29126					37.3388	0.32316		38.8416	0.24291
														43.5812	0.30144		49.5346	0.16796					32.946	0.2999					36.2406	0.29645		38.3214	0.2783					38.6682	0.38181					39.5352	0.26727		38.7838	0.26214
														27.9174	0.16973		39.593	0.28715					38.5526	0.25308					34.68	0.26154		34.5066	0.2031					38.8416	0.30597					37.8012	0.33653		27.8596	0.19997
														36.2984	0.2389		38.437	0.26553					39.6508	0.30215					40.9802	0.27015		41.2114	0.27441					36.9342	0.1676					42.3096	0.20949		31.6744	0.26978
														32.5992	0.26813		33.5818	0.2526					38.3792	0.40406					40.171	0.30562		37.9168	0.33178					34.2754	0.25841					36.5874	0.31096		30.5184	0.07688
														33.3506	0.19318		32.946	0.22055					37.9746	0.30278					39.015	0.24399		29.7092	0.05375					36.125	0.33663					41.6738	0.30399		27.166	0.09081
														35.258	0.29898		38.4948	0.36037					31.6744	0.29413					33.4084	0.29046		33.4084	0.26581					38.6104	0.30935					39.3618	0.31826		29.2468	0.12265
														31.212	0.27557		34.1598	0.21669					33.9864	0.27847					38.2058	0.33269		34.5066	0.28171					35.6048	0.30138					32.079	0.3001		29.478	0.25552
														34.1598	0.3126		35.7782	0.26954					39.1884	0.31309					41.0958	0.31364		30.1138	0.27193					35.258	0.29019					38.5526	0.25398		46.818	0.06699
														32.0212	0.21029		34.2754	0.27384					41.327	0.332					32.7726	0.24362		40.9802	0.31047					35.2002	0.07652					38.3214	0.11525		41.3848	0.30361
														35.6626	0.28396		37.4544	0.24046					35.9516	0.25909					26.0678	0.21245		37.281	0.14192					39.0728	0.30189					40.46	0.28355		47.6272	0.284
														33.524	0.19131		31.2698	0.16585					41.4426	0.22754					31.6166	0.19973		29.7092	0.17518					33.9286	0.26217					39.9976	0.29276		35.1424	0.19291
														31.9056	0.18786		30.6918	0.21427					38.5526	0.32867					35.0846	0.29518		42.2518	0.31331					30.8652	0.22057					44.6794	0.32562		32.8304	0.18997
														38.0324	0.3224		35.8938	0.22436					31.3276	0.32148					43.928	0.32557		38.4948	0.32848					32.657	0.24764					29.9404	0.25359		32.1946	0.23598
														39.882	0.32297		32.8304	0.17991					38.148	0.22285					36.5874	0.33822		33.4662	0.29902					43.1766	0.34373					41.4426	0.33048		37.859	0.29745
														34.8534	0.29806		32.3102	0.28795					35.3158	0.28811					40.2866	0.32591		30.6918	0.19351					32.3102	0.21756					36.6452	0.32675		38.0324	0.2701
														32.368	0.24738		36.3562	0.31703					45.6042	0.34139					33.0616	0.29694		35.6048	0.31396					40.2288	0.26114					33.235	0.20518		36.3562	0.29994
														32.079	0.28654		37.859	0.29333					30.7496	0.27771					30.634	0.24019		32.657	0.21401					38.6104	0.29228					39.015	0.31266		36.3562	0.32364
														27.5128	0.30815		32.8304	0.24246					42.8298	0.3344					44.9106	0.34008		32.368	0.19235					33.235	0.24771					41.4426	0.30446		38.8416	0.22119
														50.286	0.22704		34.0442	0.31961					40.2866	0.31549					37.6856	0.35405		38.0324	0.29051					37.57	0.29684					35.9516	0.33014		36.125	0.32572
														40.6334	0.30166		38.437	0.17516					34.7956	0.28402					31.3854	0.33949		29.1312	0.19446					25.5476	0.11663					32.8304	0.34858		36.125	0.32572
														36.0672	0.19183		33.8708	0.24354					40.5756	0.31426					30.2294	0.27771		36.5874	0.25696					35.0268	0.23205					37.8012	0.30706		39.882	0.28003
														35.8938	0.28522		34.8534	0.29566					37.4544	0.24678					37.9746	0.21731		40.0554	0.26522					34.9112	0.16714					37.5122	0.33367		41.2114	0.25035
[truncated: 3,745 more rows]
[truncated: 56 more columns]

## Sheet: Figure2-sourceData
individual erythrocyte populations for spherocytosis patiens (Figure2C)												individual erythrocyte populations under 2BP treatment (Figure2G)																								infectrion count from bood smear (Figure2H)						infectrion count from blood smear (Figure2 - Figure Supplement2C)
[truncated: 21,088 more rows]
