# Supplementary material for: Detection of human disease conditions by single-cell morpho-rheological phenotyping of blood
Source: eLife. 2018 Jan 13;7:e29213. doi: 10.7554/eLife.29213 (PMC5790376; doi:10.7554/eLife.29213)
Supplement: Figure 3—source data 1. [file elife-29213-fig3-data1.xlsx]

## Sheet: Figure3
Figure 3A and 3B (see also Figure3-Supplement1 and 2, and Figure3-sourceData for population data)									Figure 3C to 3H (ALI and RTI, all population data in Figure2-sourceData, normal in Figure1-sourceData)
mean and SD of population medians of stimulated neutrophils in whole blood, relative to initial population medians before stimulation									ALI example population data for neutrophils (Figure 3C)						RTI example population data for neutrophils (Figure 3C)						populations medians relative to mean of all population medians per cell type of normal control (Figure 3E to 3G)
	rel. cell size	SD rel. cell size	rel. deformation	SD rel. deformation
	[]	[]	[]	[]					normal			ALI			normal			RTI			neutrophils (Figure 3E)												monocytes (Figure 3F)												lymphocytes (Figure 3G)
before stimualtion	1	0	1	0					cell size	deformation		cell size	deformation		cell size	deformation		cell size	deformation
fMLP 30 min	1.07984	0.02135	1.33672	0.06987					[µm^2]	[]		[µm^2]	[]		[µm^2]	[]		[µm^2]	[]		normal (see Figure 1E)				ALI				RTI				normal (see Figure 1E)				ALI				RTI				normal (see Figure 1E)				ALI
LPS 135 min	1.09194	0.03512	1.27757	0.13342					67.048	0.07253		80.631	0.09159		67.048	0.07253		69.938	0.07807		donor	rel. cell size	rel. deformation		patient	rel. cell size	rel. deformation		patient	rel. cell size	rel. deformation		donor	rel. cell size	rel. deformation		patient	rel. cell size	rel. deformation		patient	rel. cell size	rel. deformation		donor	rel. cell size	rel. deformation		patient
S. aureus	1.04539	0.02258	1.21815	0.1515					70.9206	0.08038		71.383	0.06		70.9206	0.08038		86.6422	0.09642			[]	[]			[]	[]			[]	[]			[]	[]			[]	[]			[]	[]			[]	[]
									61.0368	0.07879		73.0014	0.07188		61.0368	0.07879		82.365	0.11673		m1	0.9725	0.98291		1	1.14799	1.15248		1	1.11514	1.32918		m1	1.02537	1.11433		1	1.06305	1.11467		1	1.10163	1.3748		m1	0.97265	0.94697		1
									63.58	0.07219		77.6832	0.11154		63.58	0.07219		73.2326	0.09147		m2	0.98979	0.97955		2	1.16527	1.38692		2	1.09136	1.32651		m2	0.99218	1.01545		2	1.14917	1.24019		2	1.10432	1.95068		m2	1.01851	0.92233		2
p-values for comparing:									67.5104	0.09309		78.3768	0.06573		67.5104	0.09309		72.9436	0.07846		m3	1.01443	0.96242		3	1.14885	1.167		3	1.1039	1.00976		m3	1.0173	1.01793		3	1.09445	0.99302		3	1.14289	1.2202		m3	1.03429	1.07765		3
before / stimulated with:	deformation	cell size							63.869	0.08477		81.9026	0.08245		63.869	0.08477		81.787	0.0892		m4	0.97164	0.91766		4	1.03993	0.97069		4	1.03042	0.94457		m4	0.96617	0.84809		4	1.02717	0.91107		4	1.06664	0.89646		m4	0.98468	1.09351		4
fMLP	0.00902	0.00902							61.9038	0.07884		85.0816	0.12584		61.9038	0.07884		68.3774	0.08871		m5	1.02869	1.12806						5	1.10692	1.27369		m5	1.05094	1.21315						5	1.12181	1.40749		m5	1.08766	1.02799
LPS	0.01431	0.01753	(from linear mixed models)						59.3028	0.06728		76.4116	0.08616		59.3028	0.06728		76.4116	0.07612		m6	0.99757	1.0265						6	1.065	1.09475		m6	1.04197	0.93359						6	1.09355	1.08262		m6	0.99821	1.01879
S. aureus	0.02092	0.04331							66.0654	0.07247		71.961	0.08092		66.0654	0.07247		65.4874	0.07952		m7	1.01659	0.97741										m7	1.08369	1.09804										m7	1.05609	0.76383
									64.158	0.07249		79.9952	0.07861		64.158	0.07249		79.4172	0.06922		m8	1.01486	1.07796										m8	0.99398	1.26914										m8	0.9952	1.10944
									71.9032	0.07645		66.759	0.09587		71.9032	0.07645		78.03	0.1059		m9	0.98288	0.95016										m9	0.9563	0.82757										m9	0.97265	0.95908
									66.47	0.07079		73.695	0.09855		66.47	0.07079		69.5912	0.08904		m10	1.02134	0.92273										m10	0.98411	0.96244										m10	1.01249	1.06772
									64.447	0.07158		82.1338	0.0868		64.447	0.07158		78.4346	0.07821		f1	1.01918	1.16758										f1	1.00115	1.2394										f1	1.00573	1.05085
									75.1978	0.07388		75.0822	0.07432		75.1978	0.07388		80.5732	0.11438		f2	0.99195	1.01441										f2	1.03973	1.062										f2	1.01324	1.02334
									59.4184	0.07765		75.4868	0.09188		59.4184	0.07765		70.0536	0.0771		f3	1.00189	1.05247										f3	0.96168	0.83335										f3	0.9704	1.08265
									72.3078	0.07602		72.3656	0.06463		72.3078	0.07602		67.2792	0.08098		f4	1.04944	1.14877										f4	0.97783	0.91099										f4	0.98393	1.04014
									70.9784	0.09075		66.1232	0.03792		70.9784	0.09075		73.2904	0.07044		f5	0.96126	0.91358										f5	0.97917	0.80738										f5	1.01851	1.14496
									64.3314	0.0939		69.36	0.06293		64.3314	0.0939		69.938	0.08172		f6	1.00362	0.96081										f6	0.96034	0.84361										f6	0.98994	0.8263
									67.337	0.0783		76.1226	0.06506		67.337	0.0783		70.4582	0.08907		f7	1.03561	1.16654										f7	1.04511	1.21763										f7	0.9471	1.06923
									71.8454	0.06617		83.521	0.08197		71.8454	0.06617		84.9082	0.08223		f8	0.98893	0.91046										f8	1.08638	1.10445										f8	1.03504	0.88909
									65.892	0.06809		82.0182	0.06506		65.892	0.06809		73.0014	0.08323		f9	1.01702	0.89192										f9	0.94464	0.86482										f9	0.95988	0.96678
									65.892	0.08183		88.434	0.10331		65.892	0.08183		73.1748	0.08852		f10	0.94916	0.91412										f10	0.9554	1.00883										f10	0.96514	0.9057
									72.0188	0.08549		72.9436	0.05959		72.0188	0.08549		70.805	0.06413		f11	0.97164	0.9344										f11	0.93656	0.80619										f11	0.97867	1.01543
									58.8404	0.06554		81.498	0.09283		58.8404	0.06554		67.048	0.08587
									57.9156	0.08059		85.544	0.1047		57.9156	0.08059		80.2264	0.07409
									65.9498	0.07479		87.3358	0.07867		65.9498	0.07479		69.7646	0.07368
									61.4414	0.03923		77.452	0.09223		61.4414	0.03923		77.3942	0.10134
									60.7478	0.07923		85.1972	0.08534		60.7478	0.07923		66.0654	0.07215
									63.6956	0.08059		74.2152	0.08025		63.6956	0.08059		67.9728	0.07872
									72.1922	0.09154		75.8336	0.07716		72.1922	0.09154		65.2562	0.07731
									61.0368	0.06548		73.7528	0.06485		61.0368	0.06548		69.1866	0.08396
									65.4874	0.05509		69.8224	0.10693		65.4874	0.05509		67.4526	0.06208
									65.8342	0.07548		84.2146	0.08582		65.8342	0.07548		75.4868	0.07184
									58.2624	0.07181		82.1916	0.07894		58.2624	0.07181		74.851	0.10456
									59.3606	0.07636		87.7982	0.08717		59.3606	0.07636		72.1922	0.07766
									76.4116	0.09421		72.4812	0.07407		76.4116	0.09421		79.3594	0.08753
									62.0194	0.07225		85.6018	0.08546		62.0194	0.07225		71.7876	0.06726
									69.4178	0.07097		86.7578	0.10941		69.4178	0.07097		75.0822	0.09731
									67.048	0.10283		91.324	0.06438		67.048	0.10283		62.5396	0.11388
									62.6552	0.08916		80.5154	0.08814		62.6552	0.08916		83.81	0.11904
									58.1468	0.06979		86.8734	0.09752		58.1468	0.06979		76.1804	0.07762
									70.9784	0.08273		87.567	0.11419		70.9784	0.08273		70.7472	0.09747
									74.3308	0.08369		77.5098	0.08435		74.3308	0.08369		72.3078	0.0814
									69.8224	0.07561		71.7876	0.08593		69.8224	0.07561		80.8044	0.09727
									64.9672	0.07104		70.3426	0.08152		64.9672	0.07104		71.383	0.06506
									69.4178	0.08259		76.007	0.06912		69.4178	0.08259		66.8168	0.07948
									68.1462	0.07953		79.9374	0.08287		68.1462	0.07953		74.9088	0.0922
									67.626	0.07796		80.631	0.08453		67.626	0.07796		70.805	0.07807
									63.6378	0.08627		76.7006	0.12024		63.6378	0.08627		82.0182	0.09431
									66.1232	0.07505		74.7354	0.10009		66.1232	0.07505		64.8516	0.06851
									65.314	0.07918		84.0412	0.07281		65.314	0.07918		71.094	0.08804
									68.9554	0.06936		72.0766	0.07159		68.9554	0.06936		68.782	0.05904
									67.915	0.06583		80.6888	0.09099		67.915	0.06583		68.1462	0.09311
									65.7764	0.06805		83.7522	0.09458		65.7764	0.06805		67.8572	0.08835
									62.3662	0.06529		73.0014	0.11652		62.3662	0.06529		63.291	0.0571
									68.6664	0.07728		81.6714	0.08294		68.6664	0.07728		79.5328	0.09735
									73.117	0.08885		75.8336	0.07727		73.117	0.08885		67.2214	0.07296
									63.4066	0.0913		83.8678	0.08506		63.4066	0.0913		69.938	0.07893
									67.4526	0.07261		71.4408	0.05893		67.4526	0.07261		73.1748	0.10201
									69.9958	0.08375		70.6316	0.08758		69.9958	0.08375		66.7012	0.06155
									56.1238	0.05658		85.4862	0.09959		56.1238	0.05658		71.3252	0.07303
									65.4874	0.07695		73.4638	0.08008		65.4874	0.07695		60.0542	0.07986
									71.2096	0.05841		87.7404	0.09413		71.2096	0.05841		74.2152	0.07063
									69.4756	0.06674		79.764	0.12058		69.4756	0.06674		64.1002	0.06517
									74.7354	0.09352		72.3078	0.06515		74.7354	0.09352		64.3892	0.07346
									64.447	0.08609		80.5154	0.07984		64.447	0.08609		67.6838	0.08185
									71.4408	0.08811		77.9144	0.06684		71.4408	0.08811		69.3022	0.05968
									64.0424	0.07574		76.8162	0.07681		64.0424	0.07574		66.759	0.07866
									72.7124	0.07992		72.7702	0.0857		72.7124	0.07992		78.319	0.08738
									60.5166	0.07886		80.1108	0.09758		60.5166	0.07886		79.1282	0.11396
									60.5744	0.05823		73.0014	0.03653		60.5744	0.05823		66.759	0.09294
									68.782	0.06914		78.8392	0.08882		68.782	0.06914		69.4178	0.07323
									58.956	0.08052		78.9548	0.05076		58.956	0.08052		77.6254	0.09032
									69.36	0.05619		84.2724	0.08185		69.36	0.05619		67.048	0.08618
									67.2792	0.08565		73.1748	0.07809		67.2792	0.08565		82.7696	0.07853
									69.36	0.08539		79.3016	0.07723		69.36	0.08539		71.672	0.07986
									69.9958	0.06525		77.2786	0.08371		69.9958	0.06525		66.9902	0.07925
									66.2388	0.0829		81.0356	0.07223		66.2388	0.0829		72.7124	0.0886
									60.9212	0.05927		67.8572	0.06045		60.9212	0.05927		63.8112	0.07803
									71.094	0.09516		67.8572	0.06045		71.094	0.09516		67.5682	0.08463
									73.4638	0.09001		88.434	0.08811		73.4638	0.09001		62.2506	0.07249
									64.6204	0.08617		81.6136	0.08084		64.6204	0.08617		87.3936	0.09191
									69.649	0.07632		72.9436	0.07638		69.649	0.07632		66.759	0.06441
									71.094	0.07463		80.1108	0.09695		71.094	0.07463		73.8106	0.07287
									66.7012	0.07083		80.342	0.08055		66.7012	0.07083		75.3712	0.10148
									73.117	0.08546		74.0996	0.08296		73.117	0.08546		61.4992	0.05154
									70.1692	0.06487		70.4582	0.06475		70.1692	0.06487		74.9088	0.06904
									68.204	0.06313		76.585	0.07556		68.204	0.06313		74.851	0.07653
									62.424	0.07585		63.9268	0.08326		62.424	0.07585		69.5334	0.10135
									72.7702	0.06475		88.6652	0.07747		72.7702	0.06475		62.7708	0.0468
									66.759	0.06984		79.3594	0.06364		66.759	0.06984		79.186	0.07227
									68.5508	0.08626		69.0132	0.07047		68.5508	0.08626		68.6664	0.08167
									66.7012	0.07456		73.2904	0.05103		66.7012	0.07456		69.4756	0.07487
									77.3364	0.0987		72.7702	0.06852		77.3364	0.0987		67.9728	0.08842
									66.2966	0.06087		78.897	0.0699		66.2966	0.06087		69.9958	0.08119
									73.0592	0.08004		90.3992	0.08269		73.0592	0.08004		75.2556	0.07199
									69.649	0.08959		85.6018	0.08086		69.649	0.08959		69.7646	0.10126
									59.3028	0.05956		69.1866	0.06115		59.3028	0.05956		67.2214	0.0831
									60.3432	0.07012		72.539	0.0739		60.3432	0.07012		64.5048	0.07466
									68.6086	0.06034		67.2214	0.10098		68.6086	0.06034		67.626	0.07038
									65.9498	0.06424		73.117	0.08129		65.9498	0.06424		68.204	0.07598
									64.9672	0.04611		72.7702	0.1062		64.9672	0.04611		74.2152	0.07705
									75.14	0.07763		68.6664	0.09258		75.14	0.07763		62.9442	0.07502
									69.938	0.08232		68.8976	0.08169		69.938	0.08232		74.0418	0.07561
									58.7248	0.08497		71.8454	0.07665		58.7248	0.08497		71.7876	0.0911
									64.8516	0.07954		70.6894	0.07534		64.8516	0.07954		68.9554	0.07241
									60.1698	0.08359		78.897	0.09931		60.1698	0.08359		65.603	0.08395
									60.979	0.07039		76.007	0.06583		60.979	0.07039		77.163	0.0842
									73.6372	0.07345		72.0766	0.06635		73.6372	0.07345		72.828	0.08144
									63.0598	0.0702		78.9548	0.07271		63.0598	0.0702		65.1984	0.07242
									72.1922	0.08525		76.874	0.0989		72.1922	0.08525		68.0306	0.07282
									65.603	0.0704		72.4812	0.04996		65.603	0.0704		68.204	0.08025
									68.8976	0.08186		74.1574	0.08575		68.8976	0.08186		75.3134	0.09727
									70.3426	0.07952		75.14	0.10281		70.3426	0.07952		71.9032	0.07349
									58.8982	0.06786		83.2898	0.08891		58.8982	0.06786		66.8746	0.08224
									68.8976	0.08495		78.319	0.10478		68.8976	0.08495		68.6086	0.08309
									65.3718	0.09395		85.0816	0.07729		65.3718	0.09395		70.8628	0.06595
									72.1922	0.0693		73.1748	0.10146		72.1922	0.0693		74.0996	0.07623
									60.112	0.05949		89.5322	0.0855		60.112	0.05949		78.2034	0.06961
									72.1344	0.08331		81.498	0.10712		72.1344	0.08331		76.296	0.09026
									66.6434	0.08034		80.9778	0.09272		66.6434	0.08034		76.874	0.08063
									69.649	0.08617		72.7124	0.03626		69.649	0.08617		87.9716	0.11552
									73.8684	0.0709		69.5912	0.08026		73.8684	0.0709		70.516	0.07592
									79.2438	0.10154		71.383	0.09725		79.2438	0.10154		67.5682	0.06779
									60.0542	0.07042		73.117	0.08647		60.0542	0.07042		66.8746	0.09991
									72.1922	0.09		71.4408	0.08252		72.1922	0.09		67.626	0.085
									73.2904	0.08053		70.7472	0.0811		73.2904	0.08053		68.8398	0.07378
									68.0306	0.07022		79.0704	0.06545		68.0306	0.07022		71.4986	0.07223
									60.9212	0.05737		76.9318	0.0885		60.9212	0.05737		78.4346	0.07705
									77.8566	0.06465		66.759	0.05465		77.8566	0.06465		74.7354	0.07601
									69.8224	0.07325		90.746	0.07252		69.8224	0.07325		73.9262	0.07809
									66.2966	0.08339		74.3886	0.07035		66.2966	0.08339		69.7646	0.0535
									65.7186	0.07685		80.2264	0.09595		65.7186	0.07685		73.3482	0.07855
									69.5912	0.07668		83.3476	0.0841		69.5912	0.07668		62.4818	0.05604
									63.5222	0.08204		70.4582	0.03863		63.5222	0.08204		77.2208	0.07359
									66.0654	0.08629		83.4632	0.08643		66.0654	0.08629		72.7702	0.0803
									68.7242	0.06364		83.6944	0.0736		68.7242	0.06364		74.1574	0.07309
									65.4296	0.07065		84.2724	0.0923		65.4296	0.07065		74.7354	0.07067
									75.2556	0.0767		72.7124	0.10755		75.2556	0.0767		67.626	0.07049
									63.58	0.06817		76.0648	0.07663		63.58	0.06817		66.8746	0.10801
									73.1748	0.08646		72.828	0.06831		73.1748	0.08646		74.0418	0.09648
									78.03	0.08963		79.8796	0.08294		78.03	0.08963		69.3022	0.07351
									62.0772	0.07485		77.6254	0.08812		62.0772	0.07485		86.5266	0.09346
									64.9672	0.07247		66.2388	0.05907		64.9672	0.07247		76.9318	0.08163
									68.0884	0.07419		74.2152	0.091		68.0884	0.07419		72.6546	0.08916
									65.025	0.07666		70.6316	0.07127		65.025	0.07666		70.3426	0.09507
									68.0884	0.09015		73.984	0.1003		68.0884	0.09015		82.0182	0.08565
									61.1524	0.08583		82.943	0.07614		61.1524	0.08583		68.5508	0.09548
									64.9672	0.06062		73.695	0.08858		64.9672	0.06062		73.984	0.05807
									75.8914	0.06164		73.695	0.08078		75.8914	0.06164		73.4638	0.07512
									69.9958	0.06665		85.1394	0.09644		69.9958	0.06665		69.8224	0.07547
									67.3948	0.08837		76.6428	0.10797		67.3948	0.08837		65.603	0.06254
									62.8286	0.05552		69.7068	0.06675		62.8286	0.05552		68.782	0.08536
									70.6316	0.08632		71.5564	0.07667		70.6316	0.08632		76.1226	0.07261
									65.1406	0.07668		77.3942	0.09258		65.1406	0.07668		67.7416	0.10156
									63.58	0.06514		77.163	0.08631		63.58	0.06514		70.0536	0.08558
									58.8982	0.06946		79.2438	0.1026		58.8982	0.06946		76.4694	0.06583
									65.1406	0.05973		68.7242	0.09179		65.1406	0.05973		78.4924	0.10387
									72.9436	0.07893		73.695	0.07132		72.9436	0.07893		62.424	0.06794
									72.25	0.09496		77.741	0.08379		72.25	0.09496		73.6372	0.09456
									71.0362	0.08218		85.3706	0.0901		71.0362	0.08218		70.8628	0.08953
									69.3022	0.07535		87.1624	0.11756		69.3022	0.07535		57.6844	0.05714
									68.6086	0.07544		71.2674	0.09453		68.6086	0.07544		78.1456	0.07521
									66.2966	0.08329		78.03	0.09516		66.2966	0.08329		66.8746	0.07191
									66.8746	0.07546		81.6714	0.09701		66.8746	0.07546		74.0418	0.08022
									58.956	0.07329		81.1512	0.0823		58.956	0.07329		67.7994	0.09609
									74.4464	0.08856		73.5794	0.08359		74.4464	0.08856		64.6782	0.06746
									64.3892	0.09009		76.8162	0.08589		64.3892	0.09009		75.5446	0.08925
									69.0132	0.09031		66.181	0.07758		69.0132	0.09031		73.406	0.08331
									70.6316	0.06342		66.1232	0.04792		70.6316	0.06342		76.4116	0.08086
									65.4874	0.05681		77.7988	0.0905		65.4874	0.05681		79.0126	0.09521
									72.8858	0.08284		80.5732	0.06855		72.8858	0.08284		72.539	0.08043
									66.2966	0.06448		75.14	0.07338		66.2966	0.06448		64.9672	0.06971
									68.204	0.08333		80.2842	0.06622		68.204	0.08333		70.1114	0.07807
									65.7186	0.05313		73.2904	0.06603		65.7186	0.05313		71.2674	0.06703
									55.6614	0.0708		86.2954	0.08969		55.6614	0.0708		71.672	0.06575
									65.7764	0.07765		85.7752	0.07392		65.7764	0.07765		67.915	0.0859
									67.2214	0.05999		76.7006	0.06714		67.2214	0.05999		69.8224	0.0818
									63.002	0.05857		67.9728	0.05766		63.002	0.05857		68.7242	0.06884
									64.3892	0.063		74.0996	0.10131		64.3892	0.063		79.475	0.07161
									74.273	0.06261		72.25	0.05913		74.273	0.06261		71.3252	0.0838
									62.7708	0.06949		73.8684	0.08099		62.7708	0.06949		75.2556	0.07005
									67.7994	0.09478		87.7982	0.09054		67.7994	0.09478		65.4874	0.08475
									64.6204	0.05597		76.3538	0.05793		64.6204	0.05597		64.1002	0.06752
									64.9094	0.07327		73.4638	0.06603		64.9094	0.07327		78.2034	0.07006
									64.3314	0.08437		78.319	0.09373		64.3314	0.08437		76.1804	0.08943
									62.8286	0.06772		82.076	0.0898		62.8286	0.06772		72.7702	0.0927
									67.4526	0.07118		76.5272	0.09583		67.4526	0.07118		71.383	0.07825
									63.6956	0.06451		73.6372	0.08305		63.6956	0.06451		69.4178	0.09015
									62.1928	0.05302		86.6422	0.08269		62.1928	0.05302		70.6894	0.08182
									62.0772	0.06212		78.5502	0.10455		62.0772	0.06212		72.7124	0.07891
									68.0884	0.07813		76.8162	0.08135		68.0884	0.07813		69.36	0.07193
									65.5452	0.09057		74.3308	0.09537		65.5452	0.09057		67.1058	0.07024
									63.9268	0.05526		82.076	0.07498		63.9268	0.05526		63.9268	0.06227
									65.1984	0.08968		70.7472	0.06673		65.1984	0.08968		72.828	0.06962
									66.7012	0.07897		73.1748	0.09544		66.7012	0.07897		61.7304	0.09731
									64.0424	0.07808		71.4986	0.08874		64.0424	0.07808		73.2326	0.08465
									70.9206	0.08477		79.7062	0.09123		70.9206	0.08477		70.6894	0.07056
									67.9728	0.07784		73.6372	0.08731		67.9728	0.07784		73.1748	0.08791
									71.2674	0.08053		79.2438	0.07792		71.2674	0.08053		76.3538	0.06567
									68.3774	0.07875		69.36	0.08541		68.3774	0.07875		63.9846	0.07609
									71.672	0.07962		85.6596	0.08544		71.672	0.07962		78.5502	0.08689
									63.1176	0.07745		80.6888	0.08873		63.1176	0.07745		72.25	0.10295
									60.979	0.06761		85.3128	0.0695		60.979	0.06761		73.0592	0.0918
									63.5222	0.0784		79.0704	0.09559		63.5222	0.0784		79.7062	0.08597
									64.736	0.07028		85.0238	0.09153		64.736	0.07028		80.8622	0.08199
									70.6316	0.1009		66.5278	0.06433		70.6316	0.1009		77.6832	0.06759
									68.3774	0.08405		82.076	0.0934		68.3774	0.08405		71.6142	0.07428
									71.4986	0.08036		81.3246	0.09071		71.4986	0.08036		68.9554	0.08021
									69.1866	0.08373		81.5558	0.09971		69.1866	0.08373		71.9032	0.08165
									67.626	0.0657		89.9946	0.08301		67.626	0.0657		78.4924	0.09108
									72.3078	0.07431		74.0996	0.08603		72.3078	0.07431		68.204	0.07763
									60.69	0.06203		69.5334	0.06062		60.69	0.06203		73.2904	0.0713
									75.14	0.08127		72.3656	0.0699		75.14	0.08127		68.3774	0.06581
									64.9672	0.09079		88.8964	0.07739		64.9672	0.09079		68.3774	0.06581
									79.1282	0.08316		81.787	0.08487		79.1282	0.08316		68.204	0.07228
									61.557	0.0733		68.2618	0.06564		61.557	0.0733		70.227	0.07704
									68.0884	0.07937		67.915	0.07713		68.0884	0.07937		74.2152	0.06835
									59.9386	0.03908		76.4116	0.07832		59.9386	0.03908		69.9958	0.07668
									63.3488	0.06789		73.406	0.09546		63.3488	0.06789		66.5856	0.08967
									72.0188	0.07272		80.631	0.07145		72.0188	0.07272		64.2158	0.05806
									68.3196	0.08196		69.4756	0.08131		68.3196	0.08196		71.961	0.08674
									60.8634	0.05853		90.457	0.0826		60.8634	0.05853		60.2276	0.07472
									60.6322	0.05967		71.8454	0.07887		60.6322	0.05967		67.2792	0.08738
									73.8106	0.08571		90.6304	0.0929		73.8106	0.08571		67.9728	0.11136
									67.8572	0.08628		71.8454	0.06853		67.8572	0.08628		65.2562	0.06895
									63.291	0.06644		72.5968	0.08077		63.291	0.06644		67.9728	0.07985
									79.475	0.0745		82.1916	0.08332		79.475	0.0745		81.2668	0.08197
									69.0132	0.08428		79.2438	0.0834		69.0132	0.08428		67.048	0.06254
									61.2102	0.02936		72.0766	0.08204		61.2102	0.02936		74.9666	0.09409
									71.0362	0.07439		85.7174	0.08326		71.0362	0.07439		77.6832	0.07308
									73.0014	0.08684		81.9604	0.08307		73.0014	0.08684		80.053	0.08139
									65.025	0.07024		73.4638	0.07215		65.025	0.07024		77.5098	0.08918
									70.4582	0.07916		69.7646	0.1009		70.4582	0.07916		80.8622	0.09449
									77.1052	0.07539		80.5732	0.08352		77.1052	0.07539		69.0132	0.08807
									69.938	0.07356		81.6136	0.10539		69.938	0.07356		85.4284	0.07885
									74.0996	0.08529		77.452	0.06758		74.0996	0.08529		63.5222	0.08422
									70.805	0.07279		80.8044	0.08159		70.805	0.07279		63.8112	0.06626
									71.1518	0.08688		78.2612	0.10034		71.1518	0.08688		74.6776	0.08897
									70.516	0.08267		69.938	0.07483		70.516	0.08267		67.7994	0.08757
									62.7708	0.06447		73.8106	0.09487		62.7708	0.06447		67.9728	0.08031
									65.603	0.0757		93.0002	0.10294		65.603	0.0757		62.713	0.08134
									64.158	0.07021		81.1512	0.10862		64.158	0.07021		76.4694	0.07076
									69.071	0.06391		76.3538	0.09407		69.071	0.06391		73.1748	0.08707
									62.2506	0.05811		75.4868	0.06171		62.2506	0.05811		69.5912	0.07433
									63.7534	0.06755		93.058	0.09814		63.7534	0.06755		65.9498	0.09236
									68.3196	0.07616		78.2034	0.09025		68.3196	0.07616		71.672	0.0771
									76.4694	0.09145		81.0934	0.08678		76.4694	0.09145		72.4234	0.08412
									63.0598	0.09309		86.0064	0.08177		63.0598	0.09309		67.626	0.07787
									65.603	0.07998		85.1972	0.10226		65.603	0.07998		75.4868	0.07639
									62.5396	0.07023		80.1108	0.08576		62.5396	0.07023		73.0592	0.07771
									71.4408	0.06554		81.0356	0.09345		71.4408	0.06554		76.4116	0.08886
									60.6322	0.07311		94.5608	0.08568		60.6322	0.07311		72.1922	0.0832
									63.9268	0.07359		75.4868	0.06365		63.9268	0.07359		78.897	0.07246
									63.6378	0.0712		75.1978	0.06102		63.6378	0.0712		63.4066	0.06587
									64.9094	0.07575		89.59	0.09122		64.9094	0.07575		67.915	0.07422
									63.1754	0.07086		89.7634	0.08802		63.1754	0.07086		71.3252	0.07243
									60.7478	0.0557		75.1978	0.09856		60.7478	0.0557		66.0076	0.0667
									63.869	0.07729		81.0934	0.11521		63.869	0.07729		67.3948	0.08169
									63.2332	0.07936		66.5278	0.06973		63.2332	0.07936		80.3998	0.08248
									60.4588	0.05444		87.7982	0.09922		60.4588	0.05444		75.2556	0.08055
									69.5334	0.08397		72.0766	0.08068		69.5334	0.08397		64.5626	0.06932
									60.8634	0.07191		87.7404	0.09775		60.8634	0.07191		70.5738	0.06833
									68.9554	0.09882		87.6248	0.08034		68.9554	0.09882		72.3656	0.07873
									68.0884	0.07842		73.5216	0.06221		68.0884	0.07842		65.603	0.0686
									68.8976	0.08614		72.828	0.0801		68.8976	0.08614		64.1002	0.08072
									63.2332	0.07222		81.0934	0.09781		63.2332	0.07222		69.8224	0.08402
									69.649	0.04943		83.0008	0.09453		69.649	0.04943		72.3078	0.09337
									78.319	0.07829		72.9436	0.10586		78.319	0.07829		73.406	0.08785
									67.1636	0.07058		74.3886	0.09944		67.1636	0.07058		67.9728	0.07692
									72.4234	0.09268		88.8964	0.09998		72.4234	0.09268		78.1456	0.0927
									75.9492	0.06337		68.8398	0.08441		75.9492	0.06337		77.7988	0.09055
									66.2966	0.06914		87.9138	0.07257		66.2966	0.06914		74.5042	0.08266
									71.672	0.07781		74.851	0.05345		71.672	0.07781		80.3998	0.07005
									75.9492	0.06811		79.7062	0.08319		75.9492	0.06811		79.764	0.09278
									58.8982	0.06782		76.4694	0.07493		58.8982	0.06782		68.1462	0.06648
									68.4352	0.05922		78.7814	0.09755		68.4352	0.05922		65.314	0.07941
									64.5048	0.07864		89.1854	0.07671		64.5048	0.07864		65.4296	0.10039
									70.5738	0.08641		81.0934	0.09365		70.5738	0.08641		72.3656	0.08875
									68.8398	0.06418		71.9032	0.0981		68.8398	0.06418		75.0244	0.07066
									60.112	0.06964		69.4178	0.05501		60.112	0.06964		72.8858	0.06683
									62.8864	0.07266		71.3252	0.05842		62.8864	0.07266		73.5216	0.08519
									64.736	0.06968		79.2438	0.08307		64.736	0.06968		71.383	0.06502
									65.5452	0.07777		75.7758	0.08296		65.5452	0.07777		72.1344	0.07506
									59.245	0.05113		74.9088	0.11493		59.245	0.05113		67.915	0.06173
									60.5744	0.04782		78.4346	0.07278		60.5744	0.04782		70.1692	0.06694
									66.2388	0.09267		73.117	0.09341		66.2388	0.09267		66.8168	0.06631
									71.672	0.07943		71.6142	0.08508		71.672	0.07943		67.2214	0.06728
									65.7764	0.08628		86.411	0.09056		65.7764	0.08628		64.447	0.08316
									64.5048	0.07971		78.6658	0.08076		64.5048	0.07971		73.1748	0.08657
									63.3488	0.08526		67.5104	0.0666		63.3488	0.08526		74.9088	0.07824
									67.5104	0.07773		73.1748	0.06707		67.5104	0.07773		73.406	0.07996
									68.8976	0.05256		81.4402	0.10492		68.8976	0.05256		64.8516	0.06953
									63.9846	0.07707		76.0648	0.06793		63.9846	0.07707		72.1922	0.07257
									68.9554	0.07556		85.833	0.09259		68.9554	0.07556		68.5508	0.08362
									62.8286	0.07344		83.1164	0.08635		62.8286	0.07344		71.9032	0.07895
									71.0362	0.07208		90.6304	0.08198		71.0362	0.07208		70.227	0.08638
									71.5564	0.07458		76.8162	0.08147		71.5564	0.07458		78.7236	0.08971
									67.626	0.07629		70.7472	0.08793		67.626	0.07629		74.273	0.0973
									64.447	0.06861		74.5042	0.07138		64.447	0.06861		66.0654	0.06686
									65.6608	0.06522		68.2618	0.06569		65.6608	0.06522		67.337	0.06164
									59.7652	0.07413		94.0984	0.06087		59.7652	0.07413		75.1978	0.08008
									64.9672	0.08014		71.383	0.0798		64.9672	0.08014		69.7646	0.08653
									63.9268	0.05979		85.544	0.08218		63.9268	0.05979		69.1866	0.07369
									73.5216	0.08442		83.7522	0.08635		73.5216	0.08442		69.4178	0.07583
									67.337	0.06856		75.0244	0.07463		67.337	0.06856		67.9728	0.0656
									73.8684	0.07304		77.5098	0.08283		73.8684	0.07304		74.4464	0.08786
									69.7646	0.06473		78.4346	0.06121		69.7646	0.06473		70.5738	0.08144
									67.3948	0.0792		89.301	0.08261		67.3948	0.0792		76.1804	0.09707
									73.0592	0.08586		84.0412	0.09541		73.0592	0.08586		65.4296	0.07489
									77.3942	0.06122		85.1394	0.08391		77.3942	0.06122		69.1866	0.08265
									66.0654	0.07576		79.5906	0.09538		66.0654	0.07576		70.227	0.07138
									71.3252	0.08896		74.1574	0.08123		71.3252	0.08896		75.14	0.08553
									69.7646	0.06061		76.7006	0.08605		69.7646	0.06061		68.8398	0.08399
									57.5688	0.08124		82.4228	0.0734		57.5688	0.08124		78.6658	0.08889
									61.6148	0.07357		81.3824	0.08063		61.6148	0.07357		66.47	0.06714
									60.8056	0.04928		73.0014	0.08119		60.8056	0.04928		74.562	0.07943
									66.9902	0.07254		69.1288	0.09614		66.9902	0.07254		70.7472	0.08279
									71.2674	0.06865		83.6944	0.0938		71.2674	0.06865		72.1344	0.08344
									65.892	0.06599		83.9256	0.07542		65.892	0.06599		67.915	0.06703
									70.3426	0.06134		83.0008	0.10437		70.3426	0.06134		74.4464	0.09065
									69.36	0.07536		83.2898	0.0959		69.36	0.07536		71.2096	0.05614
									66.4122	0.07892		78.1456	0.09239		66.4122	0.07892		83.0008	0.10039
									62.7708	0.07586		85.6596	0.09123		62.7708	0.07586		71.383	0.09585
									67.1636	0.08545		78.897	0.08602		67.1636	0.08545		72.0188	0.07851
									64.736	0.06428		75.718	0.07003		64.736	0.06428		71.2096	0.08122
									77.0474	0.07417		79.0704	0.08471		77.0474	0.07417		65.4296	0.06896
									68.6664	0.07412		71.5564	0.10408		68.6664	0.07412		67.5682	0.07269
									61.7304	0.06197		73.8684	0.10733		61.7304	0.06197		61.3258	0.0716
									65.892	0.04396		87.3936	0.07418		65.892	0.04396		82.8274	0.10044
									74.6776	0.07831		79.7062	0.0925		74.6776	0.07831		66.5856	0.06664
									73.406	0.06889		79.7062	0.0925		73.406	0.06889		76.5272	0.07734
									63.291	0.07672		70.227	0.06769		63.291	0.07672		70.2848	0.08255
									66.9324	0.07958		67.9728	0.08838		66.9324	0.07958		67.2792	0.06963
									62.5396	0.07062		76.4694	0.1038		62.5396	0.07062		76.7006	0.0821
									65.7186	0.06545		75.429	0.09556		65.7186	0.06545		67.915	0.06734
									62.713	0.06243		93.1736	0.0931		62.713	0.06243		67.337	0.06951
									67.1636	0.06824		77.5098	0.10123		67.1636	0.06824		60.6322	0.05408
									68.3196	0.06229		73.4638	0.08327		68.3196	0.06229		75.7758	0.09687
									67.6838	0.05801		84.677	0.10083		67.6838	0.05801		68.8976	0.09798
									67.5104	0.09345		69.7646	0.1025		67.5104	0.09345		75.6024	0.06627
									65.6608	0.03282		73.8106	0.08464		65.6608	0.03282		75.8336	0.07685
									57.0486	0.05834		89.2432	0.09116		57.0486	0.05834		67.048	0.07652
									66.2966	0.06746		74.0418	0.07418		66.2966	0.06746		75.5446	0.0844
									70.2848	0.08866		85.6596	0.09224		70.2848	0.08866		62.8286	0.07231
									56.933	0.05721		79.9374	0.05675		56.933	0.05721		80.342	0.09243
									65.025	0.07519		88.6074	0.10069		65.025	0.07519		69.3022	0.07407
									69.1288	0.06164		79.9374	0.0885		69.1288	0.06164		83.1164	0.09663
									68.3196	0.0851		70.227	0.06937		68.3196	0.0851		71.4408	0.08182
									72.1344	0.04819		87.567	0.08222		72.1344	0.04819		78.5502	0.09171
									66.8168	0.07538		77.5098	0.06898		66.8168	0.07538		70.6894	0.09093
									69.1288	0.07859		70.1692	0.0791		69.1288	0.07859		82.7696	0.08564
									63.7534	0.06251		71.0362	0.08615		63.7534	0.06251		67.3948	0.07755
									63.3488	0.06774		81.9026	0.09449		63.3488	0.06774		66.0654	0.07337
									70.0536	0.08465		77.5098	0.07497		70.0536	0.08465		58.1468	0.06584
									65.8342	0.08435		76.296	0.09445		65.8342	0.08435		65.7186	0.08936
									74.6198	0.08958		75.4868	0.08916		74.6198	0.08958		69.1288	0.09335
									61.4414	0.05611		75.3712	0.08173		61.4414	0.05611		70.9206	0.08565
									63.6956	0.0531		76.874	0.08664		63.6956	0.0531		69.8224	0.08844
									72.9436	0.08264		79.764	0.0805		72.9436	0.08264		67.048	0.08542
									63.3488	0.07671		92.769	0.0868		63.3488	0.07671		70.4582	0.08752
									62.2506	0.09116		79.3594	0.09795		62.2506	0.09116		69.9958	0.08363
									62.8286	0.05161		72.1922	0.07261		62.8286	0.05161		73.8106	0.0776
									76.7584	0.092		75.6602	0.10702		76.7584	0.092		70.2848	0.06612
									68.204	0.07768		72.539	0.08584		68.204	0.07768		81.3824	0.12284
									61.2102	0.06986		79.3016	0.06556		61.2102	0.06986		70.0536	0.05966
									59.8808	0.06168		76.1226	0.08125		59.8808	0.06168		66.7012	0.09538
									61.557	0.07885		77.3942	0.08386		61.557	0.07885		81.209	0.0916
									66.1232	0.06462		88.4918	0.0858		66.1232	0.06462		70.0536	0.09856
									66.47	0.06665		75.718	0.08917		66.47	0.06665		75.1978	0.06933
									65.7186	0.07978		77.3942	0.11267		65.7186	0.07978		73.6372	0.08943
									64.5048	0.08309		86.8156	0.08289		64.5048	0.08309		75.8914	0.08244
									66.9324	0.07725		88.3184	0.10024		66.9324	0.07725		75.3134	0.06878
									65.892	0.07458		67.337	0.07231		65.892	0.07458		61.846	0.05791
									58.8982	0.06834		75.718	0.06905		58.8982	0.06834		62.7708	0.07804
									67.3948	0.07129		69.4178	0.09745		67.3948	0.07129		74.7354	0.09174
									63.0598	0.07178		74.6198	0.06721		63.0598	0.07178		71.9032	0.05985
									78.8392	0.07825		69.071	0.05907		78.8392	0.07825		69.5912	0.09476
									76.9896	0.06942		77.0474	0.12216		76.9896	0.06942		77.0474	0.09429
									63.7534	0.05191		75.14	0.08444		63.7534	0.05191		76.7006	0.0766
									64.7938	0.04753		74.0418	0.07913		64.7938	0.04753		79.0704	0.09812
									60.5166	0.06685		86.2954	0.09465		60.5166	0.06685		69.9958	0.07722
									68.1462	0.1023		89.9368	0.07953		68.1462	0.1023		68.2618	0.08228
									71.7298	0.06042		65.2562	0.06521		71.7298	0.06042		72.828	0.08051
									64.736	0.07776		71.3252	0.06474		64.736	0.07776		65.603	0.06492
									59.6496	0.06865		72.4234	0.07775		59.6496	0.06865		68.1462	0.07598
									73.6372	0.08352		69.649	0.0694		73.6372	0.08352		75.5446	0.08046
									68.0306	0.07747		80.631	0.08821		68.0306	0.07747		70.0536	0.06922
									62.6552	0.0508		80.9778	0.07275		62.6552	0.0508		74.4464	0.07029
									80.631	0.08002		65.7764	0.07689		80.631	0.08002		70.805	0.08549
									66.7012	0.07323		64.3892	0.09772		66.7012	0.07323		65.0828	0.07369
									61.1524	0.06073		72.7702	0.07474		61.1524	0.06073		83.3476	0.0742
									67.626	0.07629		83.8678	0.07035		67.626	0.07629		67.4526	0.08025
									68.6086	0.0816		68.5508	0.07356		68.6086	0.0816		82.8852	0.1024
									67.6838	0.08335		80.9778	0.08995		67.6838	0.08335		72.828	0.10021
									62.713	0.07815		83.9834	0.10999		62.713	0.07815		65.603	0.08489
									67.626	0.07265		81.8448	0.09782		67.626	0.07265		69.649	0.0815
									64.8516	0.07235		85.8908	0.10729		64.8516	0.07235		65.3718	0.08723
									62.5974	0.04617		75.8914	0.08275		62.5974	0.04617		69.36	0.09255
									77.3942	0.07453		74.273	0.09468		77.3942	0.07453		72.9436	0.07551
									73.8106	0.07453		81.6714	0.06353		73.8106	0.07453		71.0362	0.06619
									60.6322	0.05556		73.1748	0.08296		60.6322	0.05556		69.36	0.06612
									64.158	0.07314		79.5328	0.10126		64.158	0.07314		74.7354	0.07899
									60.8056	0.06602		68.493	0.07945		60.8056	0.06602		87.9716	0.10436
									69.938	0.07856		69.7646	0.05486		69.938	0.07856		84.5036	0.09203
									63.291	0.06545		73.8106	0.03141		63.291	0.06545		80.3998	0.08015
									57.0486	0.03442		75.9492	0.08586		57.0486	0.03442		71.672	0.09304
									68.204	0.06727		76.9318	0.10594		68.204	0.06727		70.1692	0.06983
									72.3656	0.06813		72.828	0.09213		72.3656	0.06813		71.1518	0.08258
									73.8684	0.06386		75.5446	0.09633		73.8684	0.06386		66.1232	0.06659
									75.14	0.07794		67.9728	0.0679		75.14	0.07794		64.9672	0.08756
									58.956	0.07271		65.1984	0.06714		58.956	0.07271		71.5564	0.1057
									62.5396	0.06417		80.3998	0.0772		62.5396	0.06417		69.4178	0.0624
									68.2618	0.08733		75.429	0.08951		68.2618	0.08733		71.0362	0.07175
									68.2618	0.06348		78.2612	0.06879		68.2618	0.06348		75.4868	0.08414
									73.9262	0.07772		77.5098	0.10588		73.9262	0.07772		84.7926	0.08581
									72.9436	0.07787		80.342	0.07473		72.9436	0.07787		63.002	0.07534
									63.5222	0.08377		70.9784	0.07186		63.5222	0.08377		71.7298	0.08567
									62.7708	0.06991		83.9834	0.07945		62.7708	0.06991		72.8858	0.08455
									67.4526	0.06992		78.03	0.08379		67.4526	0.06992		71.5564	0.07543
									63.4066	0.05395		76.4116	0.05367		63.4066	0.05395		75.718	0.09925
									69.8802	0.07571		81.6136	0.09065		69.8802	0.07571		66.47	0.06675
									68.1462	0.06733		77.8566	0.07189		68.1462	0.06733		67.1636	0.06979
									64.9672	0.0707		79.9374	0.08189		64.9672	0.0707		75.7758	0.08683
									71.3252	0.04725		70.9206	0.05693		71.3252	0.04725		82.943	0.09653
									64.9672	0.09447		74.273	0.07827		64.9672	0.09447		77.2208	0.07293
									66.5278	0.07959		72.4234	0.10563		66.5278	0.07959		70.7472	0.06723
									63.7534	0.08101		87.0468	0.09384		63.7534	0.08101		75.0244	0.09145
									61.557	0.06943		88.2028	0.10168		61.557	0.06943		69.8802	0.07022
									77.3942	0.08517		87.7982	0.08814		77.3942	0.08517		80.5732	0.07788
									69.7646	0.06891		73.9262	0.09366		69.7646	0.06891		68.204	0.0959
									63.1754	0.06647		63.6956	0.02075		63.1754	0.06647		76.6428	0.06083
									70.4582	0.0776		82.1916	0.0841		70.4582	0.0776		67.626	0.07174
									57.3954	0.04304		72.7702	0.07718		57.3954	0.04304		74.562	0.09483
									67.1058	0.06809		84.388	0.07768		67.1058	0.06809		63.58	0.0617
									62.713	0.07373		82.7696	0.09037		62.713	0.07373		69.071	0.07772
									70.5738	0.06467		78.4924	0.08237		70.5738	0.06467		73.5794	0.09927
									72.1922	0.09406		75.9492	0.0855		72.1922	0.09406		74.9666	0.06037
									66.9324	0.06312		67.6838	0.08225		66.9324	0.06312		75.3134	0.07066
									63.4066	0.0679		79.186	0.10354		63.4066	0.0679		65.603	0.07484
									65.7186	0.07374		83.3476	0.09309		65.7186	0.07374		75.1978	0.07013
									64.6782	0.06604		83.81	0.09821		64.6782	0.06604		75.4868	0.10602
									56.2394	0.05029		75.4868	0.06979		56.2394	0.05029		75.3712	0.07584
									71.2096	0.06071		70.8628	0.06452		71.2096	0.06071		73.8106	0.08116
									70.227	0.0737		77.5098	0.08261		70.227	0.0737		73.406	0.088
									65.025	0.06272		82.1916	0.07476		65.025	0.06272		71.6142	0.10993
									75.14	0.07752		75.9492	0.07973		75.14	0.07752		69.1288	0.07256
									73.0014	0.07238		83.6366	0.08895		73.0014	0.07238		73.9262	0.07632
									74.5042	0.08471		73.6372	0.09781		74.5042	0.08471		70.5738	0.07446
									61.9038	0.07506		70.1692	0.06537		61.9038	0.07506		73.8684	0.08633
									60.8634	0.03739		89.301	0.10044		60.8634	0.03739		70.6894	0.09678
									65.6608	0.06753		75.0822	0.08379		65.6608	0.06753		62.1928	0.06512
									72.8858	0.0693		84.5036	0.09586		72.8858	0.0693		72.0766	0.08486
									71.383	0.08386		66.6434	0.08179		71.383	0.08386		74.1574	0.09435
									65.5452	0.08181		79.2438	0.06001		65.5452	0.08181		69.4178	0.07737
									66.7012	0.07197		76.3538	0.09057		66.7012	0.07197		81.0934	0.08068
									68.5508	0.05863		84.4458	0.08935		68.5508	0.05863		69.071	0.09019
									61.557	0.05372		77.2208	0.07274		61.557	0.05372		71.672	0.07319
									69.071	0.06916		77.9722	0.05384		69.071	0.06916		84.2724	0.09545
									71.672	0.05427		83.6366	0.07411		71.672	0.05427		77.8566	0.09316
									62.8286	0.07983		87.9716	0.07767		62.8286	0.07983		59.5918	0.078
									70.6316	0.08147		73.7528	0.06707		70.6316	0.08147		63.9268	0.06547
									66.8168	0.06105		88.9542	0.09315		66.8168	0.06105		73.7528	0.06524
									66.9902	0.07736		84.0412	0.09108		66.9902	0.07736		75.14	0.07752
									64.158	0.04833		84.7926	0.09672		64.158	0.04833		60.401	0.05379
									68.204	0.07718		78.2034	0.07341		68.204	0.07718		82.5962	0.10927
									65.7186	0.08713		94.9076	0.08592		65.7186	0.08713		72.828	0.08649
									70.516	0.09463		89.5322	0.11004		70.516	0.09463		68.2618	0.066
									62.424	0.06398		70.9206	0.08022		62.424	0.06398		71.3252	0.0704
									69.5334	0.07816		75.429	0.08966		69.5334	0.07816		62.9442	0.07475
									63.9268	0.06617		69.1288	0.06069		63.9268	0.06617		72.4812	0.08974
									72.1922	0.08912		80.8622	0.09912		72.1922	0.08912		77.8566	0.07329
									71.4986	0.06342		80.4576	0.09526		71.4986	0.06342		76.1226	0.08109
									69.4178	0.07132		69.7068	0.11735		69.4178	0.07132		65.8342	0.06956
									66.2966	0.06865		73.4638	0.07858		66.2966	0.06865		73.1748	0.0931
									59.4184	0.06391		74.0418	0.08572		59.4184	0.06391		67.6838	0.07693
									59.7652	0.0688		83.7522	0.06919		59.7652	0.0688		66.0654	0.07738
									68.8398	0.09274		71.5564	0.06854		68.8398	0.09274		76.0648	0.07964
									65.7764	0.07093		63.3488	0.06691		65.7764	0.07093		76.0648	0.0979
									66.2966	0.06805		76.8162	0.08989		66.2966	0.06805		76.007	0.08513
									64.2736	0.05772		81.2668	0.08554		64.2736	0.05772		66.4122	0.09767
									67.4526	0.07821		70.1692	0.08194		67.4526	0.07821		69.7068	0.06852
									60.9212	0.06946		71.8454	0.08556		60.9212	0.06946		71.2096	0.08106
									68.3774	0.08243		77.163	0.0944		68.3774	0.08243		69.3022	0.07899
									65.025	0.07921		74.3886	0.10417		65.025	0.07921		75.0822	0.09507
									67.6838	0.07497		74.0996	0.08049		67.6838	0.07497		75.4868	0.07932
									61.3836	0.0775		82.7118	0.08201		61.3836	0.0775		82.1916	0.08949
									60.5166	0.06082		68.3196	0.08198		60.5166	0.06082		68.2618	0.07897
									67.5682	0.07135		79.3016	0.08649		67.5682	0.07135		71.7298	0.07882
									74.0996	0.06702		70.5738	0.05184		74.0996	0.06702		70.2848	0.0822
									65.314	0.05442		83.7522	0.07061		65.314	0.05442		89.879	0.09676
									64.158	0.05812		66.7012	0.07276		64.158	0.05812		67.337	0.0686
									69.2444	0.07641		73.984	0.09078		69.2444	0.07641		69.649	0.08783
									64.5048	0.0704		80.7466	0.06512		64.5048	0.0704		82.654	0.07153
									63.2332	0.0659		78.0878	0.06055		63.2332	0.0659		71.3252	0.07599
									62.3662	0.06375		82.4806	0.08092		62.3662	0.06375		64.9672	0.07228
									64.5048	0.05498		67.1058	0.07134		64.5048	0.05498		86.0064	0.10055
									65.2562	0.0637		79.186	0.0729		65.2562	0.0637		68.8398	0.07082
									70.7472	0.07863		73.4638	0.06638		70.7472	0.07863		64.9094	0.09134
									69.0132	0.05529		75.3134	0.08146		69.0132	0.05529		81.5558	0.07825
									62.713	0.06964		77.452	0.08373		62.713	0.06964		72.0766	0.08289
									59.3606	0.05489		77.2786	0.07437		59.3606	0.05489		72.7124	0.07689
									64.5048	0.07007		80.8622	0.09435		64.5048	0.07007		74.6776	0.07268
									62.424	0.06579		73.0014	0.08471		62.424	0.06579		73.8106	0.07101
									74.0418	0.08038		75.2556	0.08179		74.0418	0.08038		58.956	0.05579
									56.933	0.08403		90.168	0.07933		56.933	0.08403		73.0592	0.05336
									70.1692	0.07686		79.5328	0.08618		70.1692	0.07686		60.1698	0.06054
									70.8628	0.06913		81.9026	0.10476		70.8628	0.06913		77.7988	0.09499
									65.2562	0.05171		94.0406	0.09001		65.2562	0.05171		78.4346	0.07137
									63.7534	0.08564		63.4066	0.05739		63.7534	0.08564		75.6602	0.08504
									63.5222	0.07443		73.5794	0.08866		63.5222	0.07443		62.3084	0.0698
									73.5216	0.07699		72.3078	0.08559		73.5216	0.07699		65.7186	0.08864
									70.3426	0.06914		77.9144	0.07394		70.3426	0.06914		71.672	0.07452
									72.4812	0.07082		79.4172	0.07286		72.4812	0.07082		78.3768	0.07749
									68.6086	0.05988		89.7634	0.08354		68.6086	0.05988		69.3022	0.08879
									64.2736	0.06922		92.8846	0.07155		64.2736	0.06922		64.7938	0.07609
									72.8858	0.08255		73.8684	0.07994		72.8858	0.08255		64.5048	0.05793
									74.6776	0.07749		79.7062	0.0881		74.6776	0.07749		77.9722	0.0759
									67.915	0.07938		75.4868	0.08839		67.915	0.07938		66.181	0.09693
									68.3774	0.07966		78.0878	0.07979		68.3774	0.07966		86.122	0.07496
									59.9386	0.07131		90.9772	0.09915		59.9386	0.07131		72.1922	0.0854
									68.3774	0.0584		69.3022	0.07586		68.3774	0.0584		68.3774	0.08215
									76.1804	0.06957		74.9666	0.08222		76.1804	0.06957		79.8796	0.06766
									62.3084	0.04347		72.25	0.08878		62.3084	0.04347		69.7646	0.06241
									65.5452	0.01251		72.3078	0.09166		65.5452	0.01251		76.7006	0.07956
									69.4178	0.08006		81.3246	0.08581		69.4178	0.08006		65.314	0.08798
									61.6148	0.04461		76.9318	0.0806		61.6148	0.04461		82.8852	0.08817
									55.8348	0.05828		74.273	0.07721		55.8348	0.05828		63.002	0.07665
									73.7528	0.0762		74.3308	0.0633		73.7528	0.0762		65.1406	0.06748
									70.2848	0.07175		71.8454	0.08886		70.2848	0.07175		64.8516	0.08795
									69.5912	0.08419		83.1164	0.11645		69.5912	0.08419		74.6776	0.08196
									65.603	0.06898		83.8678	0.10437		65.603	0.06898		87.567	0.1067
									61.846	0.05015		70.9784	0.06522		61.846	0.05015		68.6086	0.07307
									71.094	0.07998		67.7994	0.0776		71.094	0.07998		69.1866	0.06055
									62.3662	0.05462		88.0872	0.09676		62.3662	0.05462		67.4526	0.08052
									61.7882	0.06298		83.232	0.08317		61.7882	0.06298		80.631	0.08468
									69.938	0.06606		80.8622	0.1187		69.938	0.06606		81.209	0.09439
									61.7304	0.07437		88.0294	0.07215		61.7304	0.07437		70.3426	0.0723
									73.2904	0.08046		77.3364	0.07984		73.2904	0.08046		66.0076	0.08159
									68.8398	0.07747		85.0238	0.0735		68.8398	0.07747		74.273	0.08611
									70.6316	0.07734		77.7988	0.08261		70.6316	0.07734		62.3084	0.0585
									56.355	0.04266		83.81	0.08861		56.355	0.04266		70.8628	0.05571
									63.4066	0.05949		73.406	0.07149		63.4066	0.05949		74.9088	0.07984
									67.1058	0.08012		68.3774	0.07645		67.1058	0.08012		68.6086	0.0791
									64.9094	0.07268		77.1052	0.08024		64.9094	0.07268		73.2326	0.07291
									73.984	0.09071		78.7236	0.08252		73.984	0.09071		68.9554	0.09728
									60.8056	0.04889		83.6944	0.09328		60.8056	0.04889		64.3892	0.05729
									72.25	0.06893		87.856	0.10453		72.25	0.06893		65.2562	0.06716
									69.4756	0.08956		87.1046	0.07256		69.4756	0.08956		66.5278	0.08982
									67.1636	0.07988		78.03	0.1046		67.1636	0.07988		74.9088	0.1008
									73.6372	0.08407		73.7528	0.07561		73.6372	0.08407		66.47	0.07994
									64.3314	0.0647		82.076	0.08624		64.3314	0.0647		80.2264	0.0814
									65.603	0.065		89.6478	0.10474		65.603	0.065		64.5048	0.08635
									65.892	0.05214		77.9144	0.0771		65.892	0.05214		69.7646	0.07233
									61.7304	0.05968		71.3252	0.07584		61.7304	0.05968		75.0244	0.09038
									69.938	0.05084		82.076	0.08384		69.938	0.05084		78.0878	0.08879
									69.2444	0.069		80.2842	0.08493		69.2444	0.069		69.8224	0.08095
									65.1984	0.06593		67.1636	0.08195		65.1984	0.06593		66.2966	0.06289
									66.7012	0.06233		94.5608	0.08654		66.7012	0.06233		70.1114	0.06752
									60.1698	0.08025		79.9374	0.06629		60.1698	0.08025		79.4172	0.1125
									65.8342	0.05967		67.2792	0.08296		65.8342	0.05967		73.1748	0.06736
									67.3948	0.06969		75.8336	0.08052		67.3948	0.06969		78.9548	0.09178
									76.296	0.09723		71.383	0.07356		76.296	0.09723		62.3662	0.07867
									61.0368	0.0544		81.0934	0.09281		61.0368	0.0544		67.2792	0.09538
									66.3544	0.08061		77.9144	0.08683		66.3544	0.08061		76.1226	0.07322
									68.0306	0.07296		88.0294	0.1036		68.0306	0.07296		70.805	0.07286
									62.5974	0.06938		73.2326	0.06101		62.5974	0.06938		63.7534	0.07548
									64.447	0.08261		74.851	0.07869		64.447	0.08261		66.5856	0.06601
									60.979	0.06539		87.567	0.08077		60.979	0.06539		71.672	0.06981
									62.0194	0.05958		87.567	0.08997		62.0194	0.05958		70.6894	0.07309
									69.071	0.07878		75.8914	0.07125		69.071	0.07878		75.5446	0.08587
									57.2798	0.06651		71.2674	0.06253		57.2798	0.06651		83.4632	0.07004
									62.7708	0.02618		66.9324	0.07415		62.7708	0.02618		66.3544	0.08235
									55.199	0.04247		80.631	0.04833		55.199	0.04247		71.961	0.07571
									65.4296	0.07969		84.677	0.09461		65.4296	0.07969		67.7994	0.07743
									61.1524	0.06597		82.4228	0.0496		61.1524	0.06597		69.9958	0.10054
									63.2332	0.07475		72.9436	0.0892		63.2332	0.07475		73.406	0.06541
									66.9902	0.05604		99.8784	0.07906		66.9902	0.05604		66.9902	0.05801
									69.1288	0.07141		69.4756	0.09173		69.1288	0.07141		72.3078	0.06625
									64.8516	0.06205		72.4812	0.09469		64.8516	0.06205		77.2786	0.08239
									71.9032	0.06597		74.5042	0.07825		71.9032	0.06597		65.8342	0.08375
									65.9498	0.07018		71.6142	0.08647		65.9498	0.07018		71.2096	0.06649
									58.0312	0.05696		79.0126	0.07086		58.0312	0.05696		67.9728	0.07821
									72.6546	0.06985		89.6478	0.10101		72.6546	0.06985		79.6484	0.07428
									61.3258	0.06234		81.6136	0.08218		61.3258	0.06234		70.6894	0.07734
									70.3426	0.0546		70.516	0.08103		70.3426	0.0546		71.7298	0.06007
									67.7416	0.09355		76.7584	0.06963		67.7416	0.09355		72.0188	0.07673
									70.7472	0.06575		75.2556	0.08479		70.7472	0.06575		65.4874	0.07861
									55.488	0.05177		81.4402	0.10715		55.488	0.05177		66.6434	0.09537
									64.2158	0.07476		71.7298	0.1101		64.2158	0.07476		65.8342	0.07109
									60.7478	0.09269		73.4638	0.06333		60.7478	0.09269		69.9958	0.08367
									69.5912	0.06876		67.5682	0.09461		69.5912	0.06876		64.3314	0.06281
									68.8976	0.07572		71.1518	0.08117		68.8976	0.07572		73.406	0.07029
									67.2214	0.06792		71.961	0.06764		67.2214	0.06792		73.1748	0.07729
									62.0772	0.06423		71.4986	0.08617		62.0772	0.06423		73.5794	0.06046
									59.6496	0.05678		76.3538	0.06955		59.6496	0.05678		73.8684	0.07469
									70.1114	0.05898		78.608	0.09007		70.1114	0.05898		85.1972	0.1021
									70.0536	0.08112		76.007	0.08006		70.0536	0.08112		65.4874	0.09425
									66.8746	0.05027		78.608	0.05912		66.8746	0.05027		66.9902	0.09414
									62.0194	0.06003		80.92	0.07812		62.0194	0.06003		70.227	0.06633
									62.135	0.08446		91.7286	0.09512		62.135	0.08446		81.6714	0.07393
									56.8174	0.06287		84.6192	0.06982		56.8174	0.06287		73.117	0.08613
												69.7068	0.07342					77.6832	0.07821
												82.3072	0.07764					65.5452	0.06585
												70.2848	0.07827					62.7708	0.05304
												76.6428	0.06296					65.8342	0.06745
												85.7174	0.072					72.6546	0.07222
												72.3656	0.07155					64.158	0.049
												72.8858	0.07043					72.539	0.08003
												76.3538	0.08039					71.2096	0.09836
												72.9436	0.07519					79.5906	0.0899
												74.7932	0.07132					63.1754	0.04889
												72.539	0.06135					74.9088	0.07239
												71.2096	0.0627					68.2618	0.0778
												75.3134	0.07736					74.3886	0.06744
												76.296	0.08099					66.5278	0.07995
												76.7006	0.07852					67.8572	0.07736
												91.1506	0.06998					71.094	0.08383
												78.897	0.10795					71.1518	0.08493
												82.2494	0.08183					60.3432	0.06634
												74.0996	0.06961					83.0008	0.07705
												75.9492	0.06358					75.0822	0.07609
												78.608	0.07723					83.4632	0.0745
												78.5502	0.07908					69.2444	0.07337
												81.5558	0.09682					84.099	0.07971
												77.6254	0.08766					85.0816	0.06829
												81.8448	0.08395					66.5278	0.07686
												74.5042	0.08025					74.562	0.08141
												71.5564	0.08131					65.7186	0.08557
												65.025	0.07257					70.805	0.07039
												78.03	0.08198					71.961	0.08637
												76.1804	0.06774					74.7354	0.08762
												74.851	0.07996					66.4122	0.09305
												72.1922	0.07619					66.9324	0.06596
												75.9492	0.08328					88.434	0.09123
												68.3774	0.08625					70.516	0.0858
												90.3414	0.08386					82.076	0.08172
												80.1108	0.09779					74.1574	0.07866
												79.475	0.09059					71.1518	0.06923
												69.5912	0.08423					69.5912	0.084
												72.0766	0.07587					69.649	0.06094
												74.5042	0.07773					71.9032	0.07944
												77.741	0.07617					63.1754	0.05788
												85.0816	0.09081					73.3482	0.07125
												67.2792	0.10485					74.0996	0.06342
												65.2562	0.1035					68.2618	0.09315
												77.6254	0.08314					70.5738	0.06687
												72.0188	0.07039					80.92	0.07225
												71.7298	0.06339					74.7932	0.06167
												84.966	0.08242					72.1922	0.08496
												77.0474	0.07594					70.2848	0.06553
												75.3712	0.0639					81.4402	0.07193
												74.562	0.08957					80.1108	0.06946
												72.828	0.08409					67.7994	0.06447
												79.186	0.09368					71.094	0.0797
												77.0474	0.06947					79.8796	0.07603
												76.9318	0.09568					60.979	0.06439
												73.9262	0.08036					68.4352	0.08024
												78.1456	0.06227					83.0008	0.07193
												80.053	0.08979					76.6428	0.08026
												81.6136	0.06866					78.0878	0.08723
												77.3942	0.08895					76.9318	0.0801
												71.961	0.09442					80.4576	0.09449
												68.7242	0.06312					74.2152	0.06671
												72.3078	0.06727					71.383	0.06762
												81.0356	0.11228					80.053	0.08697
												93.347	0.04744					65.4874	0.08069
												78.6658	0.08408					77.0474	0.07582
												76.9318	0.09655					68.9554	0.09293
												79.764	0.10483					74.0996	0.07835
												69.071	0.0939					76.9318	0.08177
												82.5384	0.05119					70.1114	0.0833
												71.5564	0.08858					78.0878	0.08119
												79.8218	0.11088					74.851	0.07464
												76.4694	0.07731					63.5222	0.07348
												77.2208	0.08361					71.672	0.05107
												89.4166	0.08436					69.071	0.07572
												70.7472	0.1024					63.7534	0.05912
												76.4694	0.08396					69.0132	0.05931
												68.204	0.0868					68.9554	0.07146
												72.4812	0.06377					77.741	0.0969
												81.0934	0.08982					76.9896	0.07102
												80.7466	0.07487					68.9554	0.05993
												74.9088	0.06443					72.1344	0.07626
												70.7472	0.07168					87.9716	0.08465
												87.2202	0.10471					77.8566	0.09336
												83.6366	0.07449					66.5278	0.06894
												73.8106	0.07494					66.0076	0.06529
												89.1276	0.08814					71.9032	0.07557
												77.6254	0.08679					66.2388	0.06479
												73.695	0.10526					74.851	0.07586
												76.6428	0.04755					72.0766	0.06574
												83.4054	0.08156					78.7236	0.0954
												75.429	0.1292					73.2326	0.07338
												81.7292	0.08007					77.2208	0.08675
												70.9206	0.07812					64.9672	0.06079
												73.5216	0.06798					69.1866	0.07757
												73.7528	0.08598					64.9094	0.06724
												74.562	0.06561					65.1406	0.06654
												78.0878	0.08201					82.5962	0.1095
												71.0362	0.08002					65.4296	0.08541
												75.8914	0.06449					72.539	0.08156
												79.8218	0.12204					74.851	0.06417
												80.9778	0.07342					79.186	0.08445
												81.3824	0.09865					87.1046	0.09247
												72.6546	0.07771					69.0132	0.09103
												73.7528	0.08955					73.406	0.06884
												80.7466	0.08997					76.2382	0.0755
												81.6714	0.10957					71.383	0.06976
												77.163	0.07242					76.7584	0.09074
												74.7932	0.07187					60.8634	0.06754
												75.0822	0.08794					73.5794	0.09888
												75.0822	0.08794					68.9554	0.07813
												78.9548	0.08323					69.3022	0.05719
												70.4582	0.07853					66.6434	0.08271
												70.516	0.07893					72.1344	0.09315
												82.0182	0.06699					72.8858	0.07083
												70.0536	0.06193					67.6838	0.0658
												69.5912	0.07696					79.5328	0.07311
												79.2438	0.09761					72.6546	0.08374
												72.7124	0.05196					69.7068	0.07785
												72.9436	0.10021					84.8504	0.08135
												78.2612	0.07698					68.7242	0.05422
												73.8106	0.09275					68.0884	0.08217
												76.5272	0.0871					72.0188	0.07103
												79.2438	0.09046					81.7292	0.09879
												79.2438	0.14992					68.3196	0.10021
												78.8392	0.09234					76.2382	0.09117
												71.4986	0.05963					78.4924	0.07723
												68.204	0.08165					76.6428	0.08669
												78.897	0.0682					74.9666	0.08678
												68.204	0.09364					70.5738	0.09493
												74.6776	0.07636					71.094	0.10816
												78.3768	0.08021					72.828	0.08506
												69.1288	0.06539					69.4756	0.06585
												69.4178	0.06765					64.9672	0.04979
												81.2668	0.08178					67.7994	0.079
												71.1518	0.09276					68.0306	0.08401
												79.4172	0.07674					79.8796	0.06631
												78.897	0.08252					71.6142	0.09837
												79.5906	0.10565					64.9094	0.07488
												80.631	0.06837					71.4408	0.06464
												75.8914	0.08793					71.0362	0.07256
												82.0182	0.08912					61.7882	0.05465
												74.4464	0.08534					76.007	0.07366
												79.4172	0.09249					66.8168	0.08859
												79.8218	0.08074					69.0132	0.085
												75.14	0.08836					85.1394	0.09645
												81.498	0.07195					73.8684	0.07685
												80.7466	0.10552					67.4526	0.07533
												74.562	0.06744					78.6658	0.09382
												78.7236	0.10018					71.383	0.07898
												73.0592	0.09856					67.048	0.07394
												72.7124	0.08273					73.3482	0.06489
												75.6602	0.09815					68.0306	0.07904
												69.7068	0.08655					66.759	0.07533
												83.8678	0.07333					66.3544	0.07806
												79.3594	0.09834					67.1058	0.08651
												73.3482	0.1227					76.0648	0.06034
												76.3538	0.08713					68.8398	0.04235
												83.1164	0.08431					70.8628	0.09142
												70.516	0.08984					82.8852	0.0913
												79.3594	0.08215					82.5384	0.09505
												76.8162	0.09522					65.9498	0.11156
												75.0244	0.08154					72.0766	0.0881
												76.585	0.07867					71.3252	0.06595
												79.4172	0.09344					66.2966	0.05083
												81.0934	0.09395					72.8858	0.10866
												92.2488	0.08119					64.9094	0.06455
												78.897	0.09383					82.3072	0.09146
												72.1344	0.06651					73.8106	0.06394
												73.695	0.08361					67.915	0.06933
												75.7758	0.09063					71.672	0.07347
												77.9722	0.08465					73.5794	0.09121
												74.6776	0.10569					70.2848	0.09454
												87.7982	0.10158					66.3544	0.06588
												81.2668	0.06844					75.0822	0.08411
												75.0244	0.10514					77.1052	0.06838
												79.764	0.09684					72.25	0.07461
												76.2382	0.09777					69.071	0.0829
												73.6372	0.06739					74.6776	0.09291
												86.989	0.09015					77.6254	0.0789
												85.7174	0.07404					74.4464	0.08367
												82.076	0.06699					71.1518	0.08013
												74.562	0.08909					70.227	0.05666
												68.782	0.08832					72.3078	0.06953
												74.1574	0.1044					66.9324	0.06821
												69.2444	0.0742					73.3482	0.08653
												84.5036	0.07392
												74.851	0.09243
												84.5036	0.07722
												67.8572	0.08948
												68.8398	0.07845
												69.8802	0.08016
												67.1058	0.06519
												75.14	0.07649
												70.0536	0.0858
												74.1574	0.08713
												70.3426	0.07292
												72.25	0.09759
												73.984	0.11503
												73.984	0.11503
												76.874	0.0849
												72.25	0.0827
												73.6372	0.02976
												71.094	0.06434
												82.076	0.07004
												82.076	0.07945
												85.1972	0.10686
												75.9492	0.07733
												82.1338	0.08357
												85.833	0.08177
												71.8454	0.05522
												74.562	0.0786
												75.4868	0.08373
												85.9486	0.10076
												67.8572	0.07798
												69.8224	0.0827
												77.2208	0.09713
												74.7354	0.08437
												83.6366	0.09774
												81.0934	0.10654
												69.649	0.05925
												68.782	0.04954
												74.9088	0.05417
												79.475	0.0844
												76.7584	0.05921
												77.6832	0.08816
												92.1332	0.09261
												82.365	0.09404
												75.8336	0.07813
												68.4352	0.06719
												76.6428	0.07564
												77.2208	0.06707
												66.5856	0.07768
												69.4756	0.06283
												66.1232	0.0596
												73.0592	0.05657
												71.961	0.07889
												78.03	0.07828
												73.1748	0.06689
												63.6378	0.06956
												75.4868	0.06901
												81.0356	0.08183
												71.3252	0.07715
												75.6024	0.02309
												78.0878	0.09033
												80.1686	0.10796
												75.6602	0.06037
												85.9486	0.08756
												84.5036	0.06581
												76.6428	0.08376
												88.0872	0.08168
												76.7584	0.06977
												76.4694	0.09402
												64.447	0.0756
												76.7584	0.08532
												79.6484	0.09155
												66.6434	0.0821
												78.897	0.0689
												77.5098	0.07329
												69.4178	0.0887
												78.608	0.09419
												79.5906	0.08659
												82.4228	0.07543
												70.7472	0.07568
												78.4924	0.06922
												66.47	0.06699
												67.9728	0.0775
												73.4638	0.08077
												87.2202	0.08529
												75.3712	0.07094
												81.209	0.09404
												73.9262	0.0733
												71.7876	0.08878
												71.4986	0.07781
												75.3134	0.06824
												85.833	0.07175
												75.8336	0.07518
												81.498	0.07834
												78.4924	0.08083
												78.3768	0.09277
												80.5154	0.09426
												78.319	0.06797
												68.0306	0.06711
												81.9604	0.09549
												80.342	0.08066
												74.6776	0.09138
												66.0076	0.07835
												74.3886	0.08367
												71.383	0.06984
												79.2438	0.09147
												84.677	0.08164
												77.1052	0.08482
												90.457	0.08235
												79.6484	0.09296
												71.7298	0.08588
												76.874	0.08091
												86.122	0.08547
												72.0188	0.09269
												86.122	0.11625
												80.2842	0.08306
												71.4408	0.06863
[truncated: 53 more columns]

## Sheet: Figure3-Supplements
Supplement1A and 1B (mean and SD of population medians, and population medians, population data in Figure3-sourceData)																			Supplement1C and 1D (mean and SD of population medians, and population medians, population data in Figure3-sourceData)																						Supplement2A and 2B (mean and SD of population medians, and population medians, population data in Figure3-sourceData)
mean and SD stimulated neutrophils, relative against initial population medians before stimulation						population medians relative to initial population medians before stimulation (+ control w/o stimualtion)													mean and SD stimulated neutrophils, relative against initial population medians before stimulation						population medians relative to initial population medians before stimulation																mean and SD, relative against initial population medians per cell type before stimulation						population medians relative to initial population medians before stimulation
incubation time	rel. cell size	SD rel. cell size	rel. deformation	SD rel. deformation															time post inhalation	rel. cell size	SD rel. cell size	rel. deformation	SD rel. deformation																		cell type	rel. cell size	SD rel. cell size	rel. deformation	SD rel. deformation
[min]	[]	[]	[]	[]			< 15 min incubation			> 15 min < 30 min incubation			> 30 min < 45 min incubation			> 45 min < 60 min incubation			[min]	[]	[]	[]	[]			90 min post inhalation			135 min post inhalation			210 min post inhalation			330 min post inhalation			450 min post inhalation				[]	[]	[]	[]			neutrophils
0	1	0	1	0		donors	rel. cell size	rel. deformation		rel. cell size	rel. deformation		rel. cell size	rel. deformation		rel. cell size	rel. deformation		0	1	0	1	0		donors	rel. cell size	rel. deformation		rel. cell size	rel. deformation		rel. cell size	rel. deformation		rel. cell size	rel. deformation		rel. cell size	rel. deformation		neutrophils	1.04539	0.02258	1.21815	0.1515		donors	rel. cell size	rel. deformation
0-15	0.97281	0.02656	0.73385	0.01327			[]	[]		[]	[]		[]	[]		[]	[]		90	0.99211	0.00877	0.98322	0.02201			[]	[]		[]	[]		[]	[]		[]	[]		[]	[]		lymphocytes	0.98013	0.10238	1.13578	0.22469			[]	[]
15-30	1.07984	0.02135	1.33672	0.06987		donor1	0.95242	0.74938		1.072	1.39266		1.09389	1.39121		1.04758	1.19334		135	1.09194	0.03512	1.27757	0.13342		donor1	0.98592	0.96765		1.06711	1.18323		1.0058	0.99938		0.99006	0.94844		0.98592	0.99799		monocytes	1.00549	0.04035	1.01149	0.08848		donor1	1.02521	1.23827
30-45	1.07436	0.01679	1.30222	0.0701		donor2	0.97693	0.73009		1.06523	1.3249		1.06205	1.3112		1.06683	1.27951		210	1.0029	0.0041	0.99824	0.00162		donor2	0.99831	0.99878		1.11678	1.37192		1	0.99709		1.02361	1.0686		1.00759	1.04972								donor2	1.02951	1.07883
45-60	1.0587	0.00898	1.20992	0.09699		donor3	1.01621	0.74573		1.06969	1.2444		1.07861	1.29445		1.06605	1.17626		330	1.00683	0.02372	1.00852	0.08497																								donor3	1.0739	1.13296
						donor4	0.96752	0.71827		1.11752	1.30348		1.08462	1.19577		1.06239	1.07536		450	0.99675	0.01533	1.02386	0.03657																		p-values for comparing:						donor4	1.05295	1.42255
						donor5	0.95096	0.72577		1.07476	1.41815		1.05265	1.31845		1.05064	1.32512																								before / after stimulation:	deformation	cell size
p-values for comparing:																			p-values for comparing:																						neutrophils	0.02092	0.04331
control / stimulated since:	deformation	cell size				donor6 - control1	0.97897	0.91992		0.97098	0.93399		0.97477	0.91563		0.99411	0.89709		before / stimulated since:	deformation	cell size																				lymphocytes	0.24821	0.5637
0-15 min	0.00157	0.24625				donor7 - control2	0.98837	0.87198		0.98422	0.88223		1.00581	0.89927		0.99502	0.8872		90 min	0.3268	0.3906	(from linear mixed models)																			monocytes	1	1
15-30 min	0.00157	0.00157				donor8 - control3	0.99187	0.93421		0.96911	1.05603		0.96098	1.03787		0.96504	0.98391		135 min	0.01431	0.01753	(from linear mixed models)
30-45 min	0.00157	0.00157																	210 min	0.1954	0.8822	(from linear mixed models)
45-60 min	0.00157	0.00157																	330 min	1	0.5946	(from linear mixed models)
																			450 min	0.7879	0.9778	(from linear mixed models)

## Sheet: Figure3-sourceData
individual neutrophil populations fMLP activation (Figure3-Supplement1A and 1B and Figure 3A and 3B)
initial measurement before stimulation																								< 15 min fMLP and control																								> 15 min & < 30 min fMLP and control
donor1			donor2			donor3			donor4			donor5			donor6 control1			donor7 control2			donor8 control3			donor1			donor2			donor3			donor4			donor5			donor6 control1			donor7 control2			donor8 control3			donor1
cell size	deformation		cell size	deformation		cell size	deformation		cell size	deformation		cell size	deformation		cell size	deformation		cell size	deformation		cell size	deformation		cell size	deformation		cell size	deformation		cell size	deformation		cell size	deformation		cell size	deformation		cell size	deformation		cell size	deformation		cell size	deformation		cell size	deformation
[µm^2]	[]		[µm^2]	[]		[µm^2]	[]		[µm^2]	[]		[µm^2]	[]		[µm^2]	[]		[µm^2]	[]		[µm^2]	[]		[µm^2]	[]		[µm^2]	[]		[µm^2]	[]		[µm^2]	[]		[µm^2]	[]		[µm^2]	[]		[µm^2]	[]		[µm^2]	[]		[µm^2]	[]
65.5452	0.06221		71.4986	0.08604		76.0648	0.08483		75.718	0.08711		69.3022	0.06424		71.961	0.07944		68.5508	0.06963		79.2438	0.09219		60.2276	0.03758		66.9902	0.03851		57.9156	0.01684		64.5048	0.03332		70.1114	0.07949		70.9206	0.09569		67.048	0.06855		81.498	0.07691		60.8056	0.03926
68.5508	0.0687		77.9722	0.06986		62.8864	0.07709		68.3196	0.07256		79.9952	0.08667		60.8634	0.0685		75.9492	0.07331		64.5048	0.07284		60.69	0.06581		65.8342	0.04594		80.7466	0.12208		68.5508	0.08688		60.979	0.06197		61.6148	0.05716		76.296	0.07239		76.4116	0.07177		78.6658	0.09778
71.094	0.09401		69.1866	0.08179		71.7876	0.08139		65.7186	0.08656		73.1748	0.07452		63.6956	0.06837		72.8858	0.07331		64.736	0.06772		70.3426	0.03887		78.0878	0.04693		63.2332	0.03396		77.1052	0.05783		73.117	0.06274		68.8398	0.06679		71.8454	0.06972		70.0536	0.04911		88.434	0.09572
66.9902	0.06185		72.7124	0.07594		70.2848	0.07856		66.8168	0.06857		76.4694	0.07214		64.3892	0.0768		73.1748	0.0773		73.3482	0.0628		76.8162	0.06356		70.805	0.06764		78.897	0.03761		73.984	0.15305		66.8746	0.0285		66.7012	0.07347		63.8112	0.06367		70.1692	0.06631		77.1052	0.08842
63.6378	0.06368		70.8628	0.08584		69.1866	0.07266		66.9902	0.08812		73.3482	0.08053		75.5446	0.08005		66.9324	0.06954		71.0362	0.06682		78.4346	0.07289		78.4346	0.06564		65.7764	0.04602		67.7994	0.05514		57.0486	0.01997		68.493	0.06345		64.7938	0.04564		63.5222	0.07809		81.0356	0.14529
69.4756	0.0816		73.8106	0.09301		77.163	0.08475		67.626	0.08125		74.2152	0.0763		65.025	0.07225		71.3252	0.07361		80.8044	0.06694		63.002	0.09402		79.8218	0.07991		72.4812	0.02621		60.5166	0.07777		64.447	0.05968		73.117	0.06944		66.6434	0.0491		76.4694	0.04922		67.5682	0.11058
67.915	0.06296		63.5222	0.07494		77.3364	0.08172		61.4414	0.0709		72.4812	0.08219		78.03	0.08167		77.9722	0.07406		73.406	0.0665		68.3196	0.03381		69.5334	0.04052		67.1636	0.04743		69.36	0.11078		74.0418	0.0538		64.7938	0.06735		70.9206	0.06849		74.4464	0.07866		67.1636	0.08595
68.8976	0.08138		67.7994	0.09082		80.5154	0.07163		68.2618	0.06571		70.2848	0.06839		67.7416	0.08281		71.0362	0.07507		68.3196	0.0804		69.4178	0.08648		75.14	0.04277		56.1816	0.04096		66.759	0.05055		67.7416	0.05345		63.6378	0.07552		63.9846	0.06208		75.718	0.08705		72.0766	0.10093
73.3482	0.09274		67.915	0.07658		80.8044	0.07701		71.4408	0.07112		68.8398	0.09443		65.892	0.0922		66.1232	0.06672		73.6372	0.07437		74.7354	0.04414		68.6086	0.07304		67.5682	0.05226		70.227	0.03637		76.4694	0.09053		65.9498	0.10233		76.0648	0.0827		70.0536	0.04584		65.7764	0.08897
74.1574	0.07201		82.3072	0.10284		64.736	0.08349		69.938	0.09778		84.677	0.08941		67.5682	0.0764		73.4638	0.07771		69.649	0.06574		62.2506	0.03363		61.846	0.06738		64.6204	0.06229		75.4868	0.13732		72.0766	0.0692		68.204	0.06657		60.979	0.06241		69.36	0.03734		69.1288	0.09321
70.9206	0.08739		74.562	0.08298		70.227	0.08611		67.4526	0.06457		75.4868	0.10306		66.0654	0.06948		61.2102	0.06116		67.5682	0.05645		59.245	0.0839		70.516	0.0676		65.9498	0.07155		61.6148	0.05231		72.25	0.0769		64.9672	0.10047		76.007	0.07313		73.2326	0.07163		79.9952	0.09695
77.9144	0.06325		74.5042	0.0807		70.5738	0.06799		69.9958	0.07655		70.2848	0.07737		74.7932	0.07536		64.9094	0.07582		69.8802	0.0659		72.3078	0.07164		68.1462	0.07103		71.9032	0.06912		60.2276	0.04432		65.0828	0.05779		65.4874	0.07006		73.9262	0.0628		72.1344	0.05036		77.3942	0.07965
76.1804	0.08252		68.7242	0.07758		80.3998	0.06622		65.892	0.07602		78.2612	0.07788		71.3252	0.08944		69.0132	0.07812		65.603	0.07488		72.0188	0.06056		82.0182	0.10035		65.4296	0.06769		56.7596	0.04316		68.9554	0.05269		69.9958	0.08059		75.6602	0.06183		74.562	0.05031		74.9666	0.08992
70.0536	0.07266		73.5794	0.07726		62.6552	0.08151		77.9144	0.07984		68.8398	0.07256		71.3252	0.0776		80.92	0.08712		70.7472	0.07128		64.0424	0.02656		72.5968	0.09979		83.1164	0.07179		61.4992	0.04449		69.7646	0.07664		77.5098	0.08892		65.4874	0.07058		78.1456	0.07131		74.851	0.0714
78.3768	0.07631		66.759	0.06725		63.291	0.06514		74.9666	0.10462		70.6894	0.05668		70.9784	0.06514		77.452	0.09504		72.539	0.06835		70.4582	0.04025		64.1002	0.05882		64.3892	0.04608		59.534	0.0344		67.5682	0.06756		66.9324	0.05923		65.3718	0.05368		73.4638	0.06165		70.3426	0.09113
65.7764	0.07676		72.6546	0.08536		70.6894	0.08191		59.4762	0.08052		72.7702	0.09546		67.8572	0.07816		72.1922	0.08266		69.36	0.07297		71.1518	0.05295		74.7932	0.01464		66.8168	0.04072		58.0312	0.04534		76.1804	0.09362		71.8454	0.08674		67.6838	0.06459		67.048	0.06913		64.447	0.07543
72.3656	0.06318		75.3712	0.09355		78.4346	0.08374		69.4178	0.07071		78.7236	0.09204		62.5974	0.06439		75.0244	0.07203		71.094	0.0776		72.4812	0.0574		77.1052	0.06353		81.2668	0.12721		67.7416	0.0668		63.1754	0.06459		63.6378	0.06451		66.1232	0.07423		70.4582	0.05579		66.2966	0.09108
63.002	0.05888		78.1456	0.08037		75.6024	0.09611		67.8572	0.07742		72.3078	0.07754		64.3314	0.08073		68.1462	0.05466		69.3022	0.06642		68.204	0.04235		78.2034	0.13624		73.117	0.0713		69.071	0.07365		77.5098	0.04155		64.3314	0.0497		63.1754	0.05948		70.8628	0.06521		67.8572	0.06999
66.8168	0.05697		73.117	0.07203		68.204	0.08059		71.5564	0.07844		87.2202	0.12827		69.36	0.09233		70.227	0.06932		67.048	0.06516		71.0362	0.05453		66.2966	0.06062		69.9958	0.06581		56.4128	0.04449		63.9268	0.0381		61.557	0.05894		68.2618	0.08309		73.117	0.05932		74.3886	0.10792
66.2388	0.06971		70.8628	0.07995		71.3252	0.06807		61.0946	0.0723		67.8572	0.07651		73.8684	0.09152		68.0884	0.08292		66.759	0.06578		74.851	0.09482		66.47	0.06621		81.6136	0.02802		69.9958	0.05936		73.3482	0.04684		70.4004	0.07058		70.227	0.0616		78.3768	0.04186		71.2096	0.07914
70.9784	0.07417		72.3656	0.09127		74.6198	0.0686		61.4992	0.07296		77.5098	0.07621		75.0822	0.07053		71.1518	0.08048		73.5794	0.06416		68.782	0.03844		62.3084	0.0447		82.943	0.13037		62.713	0.06764		62.3662	0.05905		64.9672	0.08302		61.1524	0.0581		67.9728	0.05952		72.4812	0.09739
67.626	0.06766		74.562	0.10528		70.4004	0.09042		70.6316	0.08306		67.7416	0.09178		76.9318	0.09776		64.2736	0.06361		69.649	0.069		67.1636	0.03806		79.186	0.05819		71.383	0.04294		59.4762	0.04088		74.0418	0.05546		65.4874	0.08734		66.9324	0.04997		68.6086	0.06208		76.7006	0.1031
58.3202	0.04235		77.3364	0.08563		81.2668	0.0693		71.2674	0.07602		74.562	0.06819		62.1928	0.08814		68.5508	0.07302		72.539	0.07054		64.1002	0.03824		56.8174	0.03729		76.6428	0.04222		66.0076	0.06538		74.562	0.08046		74.6776	0.08668		69.5334	0.0592		74.6776	0.04544		80.7466	0.08812
73.3482	0.07147		76.9318	0.0836		81.6136	0.08293		64.158	0.06799		70.8628	0.0836		74.6198	0.08704		76.2382	0.08392		61.0368	0.05554		60.4588	0.04009		70.6316	0.05683		65.7764	0.15954		60.112	0.05166		73.7528	0.06739		62.0194	0.05821		66.3544	0.07747		62.0194	0.04295		57.8578	0.07128
66.9902	0.05982		71.094	0.08374		86.8156	0.09188		65.0828	0.066		72.4234	0.07608		68.3774	0.05698		63.5222	0.07143		63.9846	0.0601		58.378	0.07584		69.7068	0.06746		57.8	0.03307		64.3314	0.04254		56.2972	0.05348		67.3948	0.07618		76.4694	0.07922		67.7416	0.05158		60.401	0.08159
78.7236	0.15828		71.7298	0.08246		67.626	0.05906		75.429	0.09886		74.6776	0.07745		66.6434	0.0993		65.4874	0.07661		75.5446	0.07982		63.9846	0.03963		68.0884	0.04723		72.539	0.0365		69.8802	0.07269		65.0828	0.05371		72.0766	0.07921		76.585	0.0716		74.0996	0.05237		71.383	0.12961
61.3258	0.06461		67.2792	0.08642		66.181	0.08761		70.4582	0.07438		83.6944	0.08082		74.1574	0.09892		70.2848	0.08079		69.8224	0.06225		58.089	0.06102		65.9498	0.073		75.6024	0.03405		59.4762	0.05107		69.649	0.07356		76.007	0.06843		73.406	0.07431		70.5738	0.07095		69.3022	0.123
63.4644	0.08065		77.741	0.08654		65.7764	0.07696		67.2214	0.06985		86.8734	0.10862		63.6378	0.08375		68.7242	0.06436		67.915	0.06192		56.8752	0.03663		79.5906	0.05215		68.204	0.06334		65.5452	0.04788		66.7012	0.05188		66.2966	0.08007		70.4004	0.06664		84.388	0.05045		73.406	0.11091
66.9324	0.07394		79.8796	0.0913		77.5098	0.08224		65.7186	0.08295		69.7068	0.09269		61.268	0.05777		65.9498	0.06639		61.9038	0.04952		68.3196	0.06955		62.0772	0.0317		81.0356	0.11127		52.598	0.04843		67.626	0.08096		68.7242	0.07594		64.6204	0.07111		70.4582	0.04874		80.2264	0.11737
72.5968	0.08219		70.2848	0.06152		86.6422	0.07589		71.383	0.07785		69.5912	0.07606		69.2444	0.0767		69.0132	0.07988		72.4812	0.06878		73.3482	0.03422		70.3426	0.09294		73.8684	0.03432		68.9554	0.04785		65.2562	0.03278		67.7994	0.10617		61.9616	0.06212		76.5272	0.04372		70.516	0.05902
69.7646	0.07363		72.4234	0.07838		71.2674	0.08288		71.1518	0.0828		67.7416	0.06774		75.6024	0.09184		77.3364	0.08071		72.7124	0.08305		63.8112	0.04193		72.0766	0.11652		74.3308	0.15		63.9268	0.04574		71.1518	0.02024		64.7938	0.07507		63.4066	0.08054		62.424	0.04028		69.938	0.09385
59.9964	0.06981		78.319	0.08614		70.3426	0.09431		61.6148	0.0822		73.2326	0.0856		73.2904	0.08753		74.7354	0.07842		62.2506	0.05647		63.9268	0.02904		71.4986	0.04826		76.9896	0.05345		73.8684	0.06327		68.0306	0.05309		69.938	0.09051		65.314	0.0802		63.1754	0.06433		63.291	0.07378
65.1984	0.08016		70.1692	0.0799		76.2382	0.07526		68.6664	0.08765		76.7584	0.08447		72.25	0.08307		70.516	0.07331		75.1978	0.08046		67.5104	0.03838		74.6198	0.05462		79.2438	0.08154		67.7994	0.05701		66.1232	0.06737		65.2562	0.09963		73.9262	0.07346		80.1108	0.05621		71.4408	0.07981
68.493	0.06327		73.9262	0.09474		71.5564	0.0771		63.7534	0.07168		70.6316	0.07685		72.0766	0.07292		71.7876	0.0845		68.3774	0.05915		59.8808	0.0366		61.268	0.06824		74.851	0.05135		70.6894	0.06725		66.0654	0.04255		60.3432	0.07655		62.6552	0.03953		72.8858	0.06287		59.8808	0.07602
63.6956	0.08012		73.406	0.08408		69.7068	0.07108		62.3662	0.0781		73.2904	0.07077		70.7472	0.09506		67.9728	0.07146		76.7006	0.0749		75.2556	0.15262		81.0356	0.0612		73.4638	0.05979		63.7534	0.05814		72.1344	0.07111		66.4122	0.0746		61.4414	0.04025		67.5682	0.04606		83.6366	0.08934
64.736	0.06676		72.4234	0.07676		77.3364	0.07894		63.8112	0.07347		72.828	0.08557		65.0828	0.07843		74.6198	0.07656		69.5334	0.06055		57.8	0.04305		73.1748	0.0661		73.2904	0.09109		59.0138	0.04643		60.2276	0.01472		68.782	0.07076		65.314	0.06343		71.4408	0.05837		77.7988	0.12024
70.4582	0.07961		74.6198	0.08427		67.337	0.07016		69.071	0.07372		66.2388	0.06565		62.0772	0.08174		63.9268	0.06874		84.3302	0.07963		64.1002	0.06225		66.7012	0.05048		59.5918	0.0522		70.1114	0.08572		70.227	0.06411		66.9902	0.06273		64.2158	0.08887		68.4352	0.06561		65.314	0.0968
72.5968	0.06836		75.8914	0.09558		78.5502	0.08299		65.7764	0.07338		71.7298	0.09355		60.5166	0.07326		75.7758	0.08611		71.094	0.06916		61.1524	0.03359		68.7242	0.06269		72.9436	0.05705		65.0828	0.06869		71.6142	0.07979		69.938	0.04541		69.0132	0.0695		76.007	0.04694		76.3538	0.08586
75.8914	0.07996		81.3246	0.06753		66.8746	0.0776		68.9554	0.06668		75.7758	0.07884		73.8684	0.08688		65.0828	0.07198		71.1518	0.07013		65.0828	0.02595		65.6608	0.03343		63.5222	0.08447		66.9902	0.05287		59.9386	0.04297		72.5968	0.08959		76.3538	0.0631		74.5042	0.03354		74.4464	0.11263
61.0368	0.05328		70.4004	0.09004		68.4352	0.07804		64.9672	0.07193		76.5272	0.09523		66.9324	0.07643		76.7006	0.07372		77.9722	0.08072		68.8976	0.06079		72.4812	0.05571		86.6422	0.07613		69.649	0.0332		59.4184	0.04202		68.5508	0.08793		68.0884	0.05547		70.516	0.05678		66.9902	0.08157
75.6602	0.077		74.3886	0.08998		65.603	0.07337		66.5856	0.08185		77.7988	0.08108		63.6378	0.07304		74.4464	0.07867		66.9324	0.07926		64.2158	0.04356		61.7882	0.07684		76.1226	0.07943		68.0306	0.08628		74.6776	0.05725		64.9672	0.05919		77.163	0.16307		63.291	0.04641		67.048	0.09421
66.9324	0.05778		71.9032	0.08435		78.4924	0.08425		63.869	0.07435		70.1114	0.08989		74.851	0.0934		68.2618	0.06729		68.8976	0.07457		73.984	0.07756		66.1232	0.06138		75.0822	0.04294		64.0424	0.04173		77.452	0.06349		60.7478	0.07697		64.2736	0.04455		63.8112	0.05426		80.1686	0.11663
73.1748	0.07051		69.649	0.08248		67.5104	0.06841		69.5912	0.08828		70.805	0.0739		69.938	0.09249		70.8628	0.06925		65.314	0.06394		67.337	0.05572		68.782	0.06197		69.8224	0.04066		76.007	0.04437		68.1462	0.09023		65.6608	0.06554		63.0598	0.06297		73.7528	0.07174		67.915	0.08367
77.1052	0.08189		81.0934	0.09091		77.3942	0.09091		68.6664	0.08369		80.1686	0.07644		76.007	0.07996		67.3948	0.07537		69.2444	0.06933		57.511	0.0507		63.869	0.03049		61.1524	0.03668		60.1698	0.0479		65.892	0.05091		68.493	0.08208		69.0132	0.06536		76.585	0.05901		84.388	0.11735
68.7242	0.05822		72.539	0.08573		61.6148	0.06506		74.3308	0.08225		70.4582	0.09463		68.8398	0.0665		71.3252	0.06967		70.9784	0.08064		74.0418	0.12191		70.8628	0.05691		69.5912	0.04957		63.4066	0.03878		57.6266	0.05776		77.1052	0.08777		68.0306	0.05887		63.2332	0.04017		78.9548	0.11164
69.4756	0.06856		69.1866	0.08162		72.3078	0.0883		70.6316	0.07732		71.4986	0.0933		65.4874	0.06448		67.4526	0.07004		65.1984	0.07274		61.557	0.03076		67.6838	0.07803		75.6024	0.04002		64.5048	0.04854		71.4986	0.06375		74.2152	0.10055		65.9498	0.05729		65.6608	0.0571		69.5912	0.07144
71.0362	0.06906		67.626	0.08318		68.0884	0.09062		63.6378	0.07849		67.915	0.0516		76.007	0.07825		72.0188	0.0763		76.9896	0.08081		64.6204	0.0599		72.0188	0.06559		76.5272	0.04077		56.933	0.04604		64.5626	0.06619		62.7708	0.06392		64.736	0.05352		66.2388	0.04701		81.3824	0.12776
63.6378	0.07035		74.9088	0.08653		62.135	0.0745		71.5564	0.08619		76.5272	0.08277		71.2096	0.09133		82.4228	0.07863		69.0132	0.0582		61.7882	0.03109		75.9492	0.08984		78.7814	0.04987		70.805	0.05257		62.8864	0.06078		68.3196	0.08201		64.9094	0.07587		74.6776	0.06857		79.8218	0.0935
62.135	0.0676		67.8572	0.0799		69.8224	0.07036		71.8454	0.07353		77.3364	0.0966		65.5452	0.07167		68.6664	0.07374		81.6136	0.07715		63.9846	0.06404		71.4986	0.05002		68.3196	0.09663		56.066	0.03988		67.8572	0.04602		62.3662	0.06373		69.1288	0.05068		68.0306	0.05101		69.9958	0.10722
72.7702	0.08718		79.3594	0.09629		72.5968	0.0792		65.314	0.05375		78.608	0.07857		75.3712	0.10186		76.585	0.07427		71.7298	0.06446		58.2046	0.03919		74.1574	0.05588		75.6024	0.0616		56.4706	0.06986		66.0076	0.05181		67.2214	0.0833		71.4986	0.06872		69.5912	0.03616		77.3942	0.14779
75.0244	0.07919		67.9728	0.09543		66.5856	0.07084		74.562	0.06887		72.3078	0.07634		76.9318	0.09762		73.8684	0.07131		69.2444	0.06702		66.5856	0.03484		71.4986	0.04915		73.8106	0.03943		71.1518	0.14763		70.7472	0.02788		70.9206	0.06988		71.3252	0.07374		80.9778	0.02568		81.787	0.11237
68.8398	0.06065		76.7584	0.08297		78.03	0.07875		74.6198	0.07757		64.0424	0.06946		67.6838	0.06818		72.1344	0.08056		76.6428	0.06783		64.158	0.04281		64.6204	0.06411		76.1226	0.02306		68.0306	0.14476		66.5278	0.04852		69.8224	0.08342		62.424	0.05586		68.493	0.05943		75.3134	0.07675
72.0766	0.06413		71.2674	0.08843		65.892	0.05655		66.7012	0.0786		67.7994	0.06591		73.0014	0.09416		70.1114	0.08311		74.6776	0.07311		58.4358	0.02242		71.9032	0.06877		77.9722	0.14096		63.9846	0.04283		65.4296	0.04653		71.672	0.06299		63.9846	0.07113		67.4526	0.06624		72.9436	0.0855
64.9672	0.07878		71.8454	0.07914		67.3948	0.06106		74.0418	0.09376		71.7298	0.09286		75.7758	0.08358		69.4756	0.06631		62.3662	0.06142		58.378	0.02177		69.938	0.07817		64.5626	0.07017		60.69	0.08301		68.3196	0.08997		62.0772	0.06113		68.7242	0.07931		83.4632	0.09775		75.8914	0.06954
71.7298	0.07809		74.851	0.08576		78.6658	0.08512		66.3544	0.07618		71.961	0.08576		67.1636	0.06325		67.2214	0.07268		78.4924	0.0692		65.2562	0.03589		74.273	0.08502		77.163	0.02619		67.8572	0.03351		61.6148	0.02877		66.181	0.09138		70.9206	0.07291		63.1754	0.04352		69.36	0.10708
72.1344	0.07643		83.6944	0.08119		71.8454	0.081		63.1754	0.06265		76.7584	0.0736		63.2332	0.07929		74.562	0.08526		73.8106	0.0671		60.979	0.04448		63.2332	0.08698		71.4408	0.06458		65.025	0.06464		75.2556	0.04475		70.1692	0.08579		62.5396	0.05746		77.8566	0.05933		74.1574	0.10888
69.36	0.07735		66.2966	0.1026		69.2444	0.08727		64.0424	0.07281		76.296	0.07403		67.337	0.08296		69.5334	0.0709		72.7124	0.06703		63.6378	0.03369		68.5508	0.07293		65.0828	0.04845		66.4122	0.02641		66.5856	0.06448		59.7652	0.06425		72.0766	0.07454		72.539	0.08067		70.9206	0.09333
69.649	0.07834		68.0884	0.06924		67.626	0.07475		65.0828	0.0766		71.4986	0.06724		64.5048	0.05284		67.626	0.05842		69.0132	0.06021		57.511	0.05347		67.337	0.049		67.8572	0.04987		73.0592	0.03585		73.2904	0.07319		65.1406	0.0917		66.759	0.05225		68.2618	0.03477		68.0884	0.11303
75.7758	0.07022		83.81	0.08174		72.4234	0.08019		70.9206	0.08523		73.0592	0.08789		66.1232	0.05973		73.5216	0.08171		69.5912	0.07288		61.6726	0.04696		69.1866	0.03096		77.5676	0.13296		60.112	0.04482		76.6428	0.0482		68.0884	0.08642		62.3084	0.05916		68.3196	0.06106		66.759	0.09758
69.3022	0.07819		76.3538	0.08507		70.1692	0.07564		69.938	0.07379		71.2674	0.06172		68.8976	0.05861		72.4234	0.08666		80.1108	0.06427		68.0884	0.02853		79.8796	0.08917		71.2674	0.03204		67.1058	0.06551		75.6602	0.0482		61.9038	0.0662		64.2736	0.05692		70.7472	0.06914		69.5334	0.09374
67.626	0.07227		69.7068	0.09521		65.7186	0.06187		63.1176	0.07885		72.9436	0.06565		72.3078	0.0919		66.8168	0.05676		77.452	0.06188		60.8634	0.03679		72.8858	0.03317		74.6198	0.07043		63.1176	0.03507		78.8392	0.07883		62.0772	0.07846		57.3954	0.04756		69.3022	0.05116		79.9374	0.11139
67.5682	0.0718		70.2848	0.07654		68.8976	0.0585		69.2444	0.06917		67.2792	0.09743		69.649	0.08228		64.2736	0.0616		72.25	0.0659		66.9324	0.04912		64.0424	0.07172		78.3768	0.04678		55.0834	0.0578		66.3544	0.04658		64.3892	0.07636		64.7938	0.06988		72.4812	0.05015		66.8746	0.0938
72.539	0.06701		75.3712	0.08441		72.7124	0.0656		70.1692	0.07727		69.938	0.07755		69.36	0.09793		66.0654	0.06809		82.5384	0.07175		62.3662	0.05058		71.1518	0.09452		68.8976	0.07935		53.6384	0.02451		76.6428	0.09614		73.5216	0.07787		76.585	0.07781		63.9268	0.04543		69.0132	0.10885
74.6198	0.0755		72.4812	0.07559		73.8106	0.07807		65.6608	0.08018		64.1002	0.06966		70.8628	0.09054		66.759	0.07848		69.4756	0.08753		61.4414	0.04315		64.736	0.04999		72.6546	0.03254		67.7994	0.05083		68.1462	0.02562		69.938	0.12749		77.163	0.0761		79.5906	0.0675		68.6086	0.08288
77.3942	0.07352		70.9206	0.08097		71.4986	0.07861		66.8746	0.06888		71.7876	0.08561		77.1052	0.08759		77.8566	0.08421		70.8628	0.07165		73.2326	0.07331		65.025	0.09615		74.3886	0.02299		69.3022	0.07859		66.47	0.03316		70.227	0.07135		70.5738	0.06212		63.1754	0.04877		78.319	0.14939
63.5222	0.06234		71.4986	0.08263		67.4526	0.0873		65.4874	0.07817		67.9728	0.09031		59.7074	0.07495		65.5452	0.08269		65.603	0.06433		63.9268	0.06411		70.516	0.05147		61.4414	0.06457		67.2792	0.03071		72.25	0.08231		70.8628	0.05713		71.4408	0.08096		66.1232	0.06057		67.6838	0.12124
72.3078	0.07164		65.7186	0.07801		79.764	0.08275		72.1344	0.09011		76.874	0.0741		60.69	0.064		69.5912	0.08048		67.6838	0.08257		65.603	0.04534		68.8976	0.05956		67.626	0.04829		61.9038	0.0297		65.5452	0.03447		69.1288	0.05273		68.493	0.06531		59.3028	0.04843		69.5912	0.06289
64.2158	0.06113		75.0822	0.08969		77.3942	0.08432		73.6372	0.0716		82.8274	0.08752		72.9436	0.0824		61.846	0.06995		73.4638	0.06237		68.2618	0.03276		71.7298	0.07655		67.9728	0.06788		57.7422	0.03521		70.1114	0.07408		66.6434	0.06377		72.3656	0.10222		72.3078	0.07963		68.493	0.08706
72.828	0.08032		71.2674	0.07868		68.782	0.07516		64.5626	0.07229		68.4352	0.10083		68.7242	0.08564		80.5154	0.08082		74.3886	0.06372		55.199	0.04634		81.3246	0.07747		73.5216	0.08058		64.1002	0.06673		68.6086	0.06464		74.273	0.07698		74.1574	0.05752		71.2674	0.05782		71.6142	0.11028
63.002	0.06008		78.2034	0.09896		70.1114	0.07874		72.7702	0.09278		85.9486	0.08204		66.181	0.07589		70.805	0.08411		64.9672	0.05603		63.6378	0.07988		66.47	0.04026		76.4694	0.05244		69.938	0.0571		70.0536	0.08656		75.4868	0.08965		71.961	0.08999		69.1288	0.0462		67.626	0.10933
70.1114	0.07298		79.475	0.08054		65.025	0.06487		63.58	0.07053		62.2506	0.06577		68.782	0.08178		68.1462	0.08275		74.6776	0.06963		71.2096	0.06128		64.447	0.0574		67.048	0.02453		64.158	0.03526		61.6726	0.03909		60.979	0.0576		77.5098	0.06314		80.3998	0.08993		73.9262	0.09519
68.0884	0.08817		71.383	0.08942		76.1804	0.07551		71.961	0.09935		67.4526	0.07093		67.5682	0.07703		62.8864	0.06746		73.1748	0.05454		58.8404	0.03487		71.7298	0.05694		83.1742	0.1235		64.7938	0.0587		67.048	0.05075		64.3314	0.07733		71.6142	0.06225		69.649	0.02148		87.3936	0.10279
70.516	0.07977		66.759	0.08232		82.5384	0.09249		65.1406	0.06557		76.874	0.07712		67.6838	0.09584		59.6496	0.07447		73.0014	0.07348		56.933	0.04521		65.892	0.03093		71.4408	0.06182		60.0542	0.04101		66.4122	0.05984		62.0194	0.06502		71.383	0.07707		71.1518	0.04724		77.1052	0.11063
75.2556	0.08646		78.608	0.0877		71.961	0.0738		74.7354	0.08309		83.3476	0.08231		71.7298	0.07747		65.9498	0.0626		75.8914	0.07595		56.9908	0.03995		77.9722	0.07892		73.2904	0.06708		59.7074	0.03467		69.8802	0.07641		64.9094	0.06976		72.4812	0.05524		71.9032	0.05287		61.7882	0.06642
60.0542	0.06357		65.4296	0.06399		67.1636	0.06136		63.9268	0.07846		71.5564	0.08224		72.6546	0.0935		60.2854	0.06276		66.0076	0.06404		73.4638	0.08677		72.4812	0.06603		58.667	0.02181		65.0828	0.05479		66.8746	0.06315		64.2736	0.0914		68.6664	0.06592		75.0822	0.07615		75.3712	0.10939
70.1692	0.08981		69.8224	0.07392		66.47	0.08162		63.6956	0.05773		73.984	0.10201		69.938	0.07473		67.7994	0.06776		75.2556	0.0612		65.1984	0.06077		75.1978	0.07198		65.4296	0.05088		65.3718	0.02859		69.5912	0.09868		69.0132	0.06543		68.0884	0.05452		66.9902	0.06934		67.4526	0.06333
59.3606	0.06675		65.8342	0.08283		79.3016	0.07595		73.0014	0.07513		77.9722	0.08808		65.7764	0.068		67.1636	0.07667		64.6204	0.06235		70.516	0.03626		80.631	0.04668		73.0014	0.07316		57.9734	0.03366		60.8634	0.04		65.4874	0.08224		74.2152	0.06378		73.8106	0.05098		70.516	0.05026
77.741	0.09275		71.7298	0.08118		74.273	0.07723		70.516	0.0843		63.5222	0.06779		70.6316	0.08277		70.3426	0.07525		67.9728	0.06873		66.181	0.09884		81.5558	0.081		65.025	0.08115		61.9616	0.06866		67.2792	0.08155		75.7758	0.09346		80.1108	0.05641		74.9088	0.05303		74.9666	0.11835
71.5564	0.06916		71.094	0.08868		74.273	0.07486		69.8802	0.08812		80.8044	0.10434		62.3662	0.07503		66.2388	0.07611		71.094	0.07241		67.048	0.07434		73.6372	0.03995		73.8684	0.04653		59.3606	0.0245		67.4526	0.05512		70.516	0.08347		79.764	0.06726		67.7416	0.0603		78.319	0.13842
75.8914	0.0794		70.7472	0.07216		65.5452	0.06827		67.5104	0.06945		76.7006	0.08311		74.3308	0.09423		64.7938	0.0761		66.181	0.06495		60.112	0.04042		80.342	0.0655		80.8044	0.07907		61.2102	0.05437		64.6204	0.04476		69.4178	0.07084		69.071	0.05861		71.7298	0.04711		76.5272	0.11528
71.2674	0.07543		67.048	0.06548		71.4986	0.06696		60.112	0.07581		76.7006	0.08857		74.4464	0.08315		74.9666	0.07944		68.204	0.05576		64.0424	0.05709		78.1456	0.09098		64.447	0.03261		65.603	0.04746		73.9262	0.05185		71.094	0.06878		74.4464	0.06625		66.7012	0.05697		81.6136	0.10559
78.319	0.08874		77.2208	0.08773		66.3544	0.06871		69.0132	0.07021		77.9144	0.08638		68.2618	0.08241		74.6198	0.07676		69.0132	0.06238		67.915	0.05488		74.3308	0.05327		55.488	0.05594		62.0772	0.04731		63.0598	0.05005		69.7068	0.06947		71.4986	0.07463		70.7472	0.07217		82.0182	0.12208
79.1282	0.06526		79.8218	0.09655		69.4756	0.07872		68.493	0.08028		76.6428	0.09252		72.25	0.06522		66.1232	0.07278		70.0536	0.07131		66.4122	0.03707		71.2096	0.15467		74.1574	0.0616		71.9032	0.04627		74.3308	0.05596		73.406	0.0759		66.7012	0.05935		71.8454	0.07375		79.475	0.09297
68.0306	0.06469		66.9902	0.08301		76.585	0.08292		69.1288	0.08486		66.9902	0.06899		62.424	0.07269		64.7938	0.07258		73.1748	0.08544		61.0946	0.06474		65.4874	0.04558		57.6266	0.04217		68.4352	0.06297		73.9262	0.08644		70.227	0.07501		67.5682	0.06159		66.5278	0.05689		67.1636	0.08629
72.3078	0.07416		70.227	0.09293		70.1114	0.06936		65.025	0.08347		68.782	0.07408		75.3712	0.08362		76.8162	0.08676		70.3426	0.06754		72.0188	0.06173		71.4408	0.05128		70.9784	0.10045		73.8684	0.0462		67.5682	0.05095		72.539	0.09232		75.8336	0.06601		67.1058	0.03125		66.8168	0.09917
71.2674	0.06423		80.1686	0.09928		64.158	0.06942		63.9846	0.07812		74.851	0.08461		62.4818	0.0736		66.1232	0.08708		76.9318	0.08178		72.3078	0.05538		92.2488	0.09832		67.048	0.07852		68.9554	0.04788		72.25	0.05054		59.0716	0.05179		68.3196	0.07406		76.007	0.06578		61.4414	0.0997
73.5216	0.06503		66.9324	0.08062		69.5334	0.07321		60.5744	0.06125		76.9896	0.08719		61.9038	0.0819		74.4464	0.08473		72.3656	0.08297		63.869	0.03423		67.5104	0.0635		65.0828	0.0219		67.2214	0.03328		67.626	0.02216		68.1462	0.08141		72.3078	0.06811		66.3544	0.05712		65.5452	0.06046
66.2388	0.06468		79.7062	0.09568		73.2326	0.05905		69.1866	0.08795		73.0014	0.09748		63.1754	0.07457		67.8572	0.0728		74.7932	0.06933		59.0716	0.04107		71.5564	0.03141		76.874	0.04003		59.823	0.05189		70.7472	0.13726		71.8454	0.07554		69.36	0.07724		72.1344	0.07827		83.0586	0.11256
69.938	0.07481		79.3594	0.08543		72.0188	0.06586		65.892	0.07226		67.626	0.08235		67.915	0.08584		76.1804	0.07204		66.8168	0.0614		66.8168	0.04318		63.4644	0.04642		64.6204	0.04777		65.9498	0.05895		71.383	0.07465		65.8342	0.0733		68.5508	0.08131		63.9268	0.05936		79.8218	0.09568
68.3774	0.06685		64.6782	0.08819		67.5104	0.07511		73.9262	0.08269		77.7988	0.08966		67.5682	0.06188		67.2214	0.07571		77.1052	0.06838		60.6322	0.04823		68.3196	0.04959		76.2382	0.07171		66.7012	0.06208		62.135	0.08127		71.7298	0.08375		68.9554	0.06672		68.9554	0.07226		75.2556	0.12716
71.7876	0.06871		72.5968	0.07633		81.7292	0.07873		76.296	0.07678		72.7702	0.09912		68.4352	0.09126		65.9498	0.07835		83.0586	0.06114		60.4588	0.03671		68.2618	0.06871		83.0008	0.1287		75.718	0.06891		78.5502	0.1014		63.8112	0.08135		71.383	0.07135		71.6142	0.06537		60.401	0.09605
66.1232	0.07302		77.5676	0.08866		72.3656	0.06829		63.869	0.09413		76.7584	0.07796		75.8914	0.08034		67.6838	0.07449		75.718	0.07615		58.4358	0.04226		79.9374	0.05083		68.493	0.06822		67.6838	0.05386		70.3426	0.0412		60.1698	0.07582		66.3544	0.07012		62.1928	0.06442		77.5676	0.0724
70.9206	0.07854		80.9778	0.07872		69.1866	0.08079		73.9262	0.09294		75.9492	0.0849		70.4004	0.08965		74.6198	0.07261		70.4004	0.06166		67.8572	0.11598		75.0822	0.07802		63.4644	0.03861		63.3488	0.07034		72.6546	0.03548		67.337	0.08345		70.0536	0.06049		73.8106	0.06714		81.209	0.1049
72.4234	0.08815		66.181	0.07498		75.6602	0.09198		68.8398	0.08469		67.1636	0.06745		67.9728	0.08461		62.5974	0.06576		67.7416	0.05465		69.3022	0.05161		74.9088	0.06555		73.984	0.07598		58.4936	0.03507		71.672	0.03719		70.3426	0.06779		67.2214	0.07194		69.8802	0.06816		87.2202	0.10271
74.9666	0.08861		69.36	0.07615		70.8628	0.07335		65.603	0.08563		74.3886	0.07325		62.3662	0.07824		66.7012	0.05098		69.4178	0.06458		70.6894	0.07509		76.4116	0.04357		69.2444	0.03556		66.7012	0.03832		69.4756	0.06098		71.2674	0.08294		66.7012	0.07115		77.2786	0.07548		69.3022	0.09441
69.4178	0.07026		76.4116	0.08066		76.4116	0.07742		67.8572	0.07387		69.4178	0.07922		65.2562	0.08811		71.8454	0.07365		79.764	0.08541		65.4296	0.05655		70.6894	0.06718		61.3258	0.04216		62.4818	0.08179		65.314	0.05763		71.5564	0.06464		74.0418	0.08434		68.3196	0.0384		79.5328	0.12779
74.2152	0.08182		82.7696	0.09571		71.8454	0.0826		66.47	0.08222		61.3836	0.06294		75.3134	0.11198		73.695	0.09063		60.69	0.06624		59.7652	0.03297		76.585	0.03105		61.4992	0.06983		74.0996	0.15406		66.5856	0.09999		62.6552	0.07683		66.7012	0.07279		71.2096	0.07639		64.5048	0.09816
69.8802	0.06066		70.516	0.08518		66.8746	0.06705		72.4812	0.07654		72.0188	0.08302		71.8454	0.08528		71.9032	0.08223		66.8746	0.07574		74.6776	0.13016		68.0306	0.07604		83.6944	0.13569		61.7882	0.07246		65.3718	0.06105		62.3084	0.06719		71.7298	0.09084		65.9498	0.0471		69.8224	0.14036
66.8746	0.05721		72.539	0.0722		77.9722	0.08369		74.0996	0.08882		72.4234	0.07083		64.6782	0.0826		74.6198	0.08799		67.9728	0.07009		75.4868	0.05505		63.4644	0.05505		73.5794	0.15489		70.1692	0.08174		70.1114	0.05924		66.9324	0.05982		74.0996	0.06189		68.0884	0.06081		81.8448	0.11499
64.5626	0.07084		76.3538	0.08216		61.6726	0.07073		71.6142	0.07857		62.4818	0.0821		61.6726	0.07489		64.5048	0.06862		71.094	0.06502		66.9902	0.02722		65.4874	0.07106		69.649	0.07461		62.0772	0.05741		73.5794	0.04994		67.048	0.08055		60.5166	0.06327		70.516	0.07515		77.6254	0.10593
71.2674	0.07295		67.7416	0.09191		76.4694	0.08458		73.0592	0.08179		68.6664	0.07799		73.1748	0.09035		76.296	0.06434		67.626	0.06232		61.846	0.08496		78.319	0.05344		79.5906	0.0743		64.8516	0.05552		64.9672	0.04127		62.713	0.05979		73.5794	0.06302		66.0076	0.05675		87.2202	0.09306
63.9846	0.05831		73.8106	0.09422		77.0474	0.088		63.291	0.06912		65.0828	0.06924		76.874	0.08675		66.2388	0.0746		71.094	0.05543		58.2624	0.03945		62.7708	0.05248					65.4296	0.04337		70.4582	0.07706		67.6838	0.07663		61.6148	0.07007		66.3544	0.04646		65.4874	0.04626
66.2966	0.05568		73.0014	0.10673		69.5334	0.08412		69.1288	0.07022		67.337	0.08611		67.915	0.07264		73.8106	0.09342		82.7696	0.08786		65.603	0.07308		66.6434	0.04872					63.6956	0.05748		73.0014	0.04673		68.8976	0.08463		67.626	0.07192		64.7938	0.04849		74.562	0.10155
65.603	0.06271		71.094	0.10719		68.782	0.06744		78.03	0.08446		71.094	0.08072		60.8056	0.08643		64.2736	0.08178		64.2158	0.05564		70.9784	0.02759		73.7528	0.05779					63.5222	0.06369		68.1462	0.06953		74.4464	0.06657		62.9442	0.05388		64.2158	0.06361		75.4868	0.10786
66.5278	0.0669		66.2388	0.0593		74.3886	0.0725		73.8106	0.08459		68.1462	0.08767		63.1176	0.08568		72.9436	0.08032		79.3016	0.08568		74.6198	0.06262		73.5794	0.05949					69.4178	0.09274		58.4936	0.04254		75.0822	0.07964		71.672	0.06738		64.7938	0.05694		73.5794	0.07678
76.3538	0.06762		73.117	0.06744		61.4414	0.06628		77.1052	0.08147		74.3308	0.08071		65.0828	0.07854		72.3078	0.08266		68.5508	0.06868		63.1754	0.027		67.7416	0.07228					64.8516	0.05863		76.9318	0.07503		63.002	0.07801		61.846	0.0503		77.0474	0.08196		67.3948	0.1014
72.4234	0.06777		70.516	0.08726		76.6428	0.07427		72.7702	0.09289		80.92	0.10131		71.383	0.09995		68.9554	0.06652		68.0884	0.05386		61.7304	0.07447		64.1002	0.05566					65.314	0.05941		64.6782	0.06054		73.0014	0.0922		66.7012	0.04977		70.4582	0.06129		71.0362	0.06698
77.6254	0.06336		60.8634	0.07473		79.0704	0.08896		70.7472	0.07192		62.6552	0.06923		62.3084	0.06015		73.0592	0.0684		75.4868	0.07118		63.9268	0.04761		69.8224	0.07729					61.7882	0.05676		62.2506	0.0495		75.7758	0.08305		69.5334	0.06237		73.6372	0.06256		65.025	0.10412
73.8106	0.06436		68.7242	0.07393		73.6372	0.08383		72.3078	0.07893		75.1978	0.08404		67.7994	0.07463		67.1058	0.0664		79.8218	0.07613		64.5626	0.06338		79.3594	0.10473					61.7304	0.07158		63.7534	0.03053		64.158	0.06747		76.2382	0.06355		67.7416	0.0621		78.4924	0.12799
76.0648	0.06108		66.2966	0.09026		72.5968	0.07856		63.9268	0.07174		70.4582	0.07148		63.9268	0.09459		69.2444	0.08172		71.961	0.06433		57.8	0.0731		70.3426	0.06122					69.9958	0.06628		61.3258	0.04992		69.3022	0.07447		76.585	0.06465		65.0828	0.04226		83.3476	0.12201
69.1866	0.0647		71.383	0.08664		69.5334	0.07243		62.424	0.07317		71.4408	0.06987		76.585	0.09312		67.3948	0.08504		76.7006	0.07395		68.493	0.07364		75.14	0.07414					70.5738	0.03747		79.7062	0.05669		67.7416	0.08977		76.7584	0.05817		75.8336	0.06204		68.8976	0.0922
68.8398	0.08347		68.782	0.09221		61.268	0.07935		65.8342	0.07767		75.14	0.09688		71.2096	0.0863		69.9958	0.07663		69.8224	0.05854		62.2506	0.0475		71.2096	0.04022					60.8056	0.0581		65.9498	0.07298		68.2618	0.07148		69.4178	0.06568		62.8864	0.05129		72.0188	0.0908
69.36	0.07654		69.5912	0.07533		76.4694	0.0852		69.2444	0.08776		69.7646	0.0833		65.4296	0.06572		68.0306	0.08229		65.603	0.06829		63.6378	0.01815		75.0822	0.05405					69.8224	0.05844		63.8112	0.03751		65.025	0.06868		76.2382	0.06305		74.562	0.04646		75.2556	0.09866
76.3538	0.07267		75.429	0.07901		73.984	0.07447		61.3836	0.06128		71.2674	0.07438		66.5278	0.0954		68.0884	0.08		70.516	0.07727		63.8112	0.04727		73.695	0.0598					61.7882	0.04066		72.25	0.07704		75.3712	0.09645		69.1288	0.06243		76.296	0.06354		82.2494	0.10454
74.562	0.07458		67.7994	0.08873		72.7702	0.07644		63.869	0.07582		71.0362	0.07376		66.0654	0.08828		67.6838	0.09529		76.874	0.08174		71.2674	0.04638		71.2674	0.0399					74.7932	0.06653		64.3314	0.04212		70.4582	0.08992		72.3656	0.06498		72.4234	0.04053		73.695	0.09937
64.0424	0.0718		74.4464	0.08441		62.6552	0.0636		70.4582	0.09674		75.0822	0.09875		64.1002	0.0816		63.1754	0.08148		71.2674	0.06264		65.9498	0.03585		68.8976	0.04312					66.5856	0.04908		76.6428	0.08863		64.158	0.08382		72.3656	0.09564		72.7124	0.06354		70.6894	0.10904
69.938	0.05959		81.3824	0.0845		70.2848	0.07742		64.5626	0.07602		71.7298	0.08359		73.5794	0.09623		66.2388	0.0728		72.7124	0.07392		72.25	0.11478		68.8976	0.08785					52.4246	0.05786		66.6434	0.0661		61.6726	0.06565		67.1636	0.05974		77.163	0.07547		72.1922	0.07802
68.3196	0.07096		75.8336	0.07633		71.3252	0.07838		63.1754	0.06905		74.1574	0.07726		62.4818	0.09321		63.869	0.06231		66.47	0.05953		72.25	0.03262		70.3426	0.04387					61.4414	0.04086		66.0076	0.04373		67.048	0.06784		78.0878	0.07177		73.0014	0.04085		78.1456	0.12552
62.713	0.07178		68.493	0.0758		68.9554	0.06346		73.1748	0.05638		70.9784	0.06271		70.1114	0.09928		66.9324	0.08392		72.539	0.06401		76.8162	0.05981		76.8162	0.08022					66.8168	0.03252		68.2618	0.06828		66.4122	0.07831		76.0648	0.04784		64.6782	0.04011		80.3998	0.10245
65.025	0.07891		68.3774	0.08173		65.7186	0.06816		71.2674	0.08787		74.5042	0.07211		66.6434	0.08611		75.3712	0.08312		72.6546	0.07608		74.273	0.07038		68.4352	0.04169					69.1288	0.07481		63.6378	0.06126		57.2798	0.04298		63.002	0.06363		62.8286	0.06031		72.1344	0.11924
60.5166	0.06276		72.7124	0.0732		68.204	0.06892		67.7416	0.06481		70.6894	0.0908		68.6664	0.07583		68.2618	0.0739		80.5732	0.07607		67.8572	0.05355		75.718	0.1134					65.314	0.02236		72.6546	0.03803		67.1058	0.06438		69.3022	0.06505		70.6894	0.03975		74.851	0.11887
70.516	0.07724		70.227	0.06624		65.1984	0.06291		62.135	0.0791		64.9672	0.07403		69.7646	0.06348		77.2786	0.08462		77.741	0.077		61.0368	0.02682		66.5278	0.07651					67.915	0.14891		75.4868	0.05238		73.6372	0.06013		66.3544	0.079		64.3892	0.04245		71.2674	0.08807
63.2332	0.07876		72.9436	0.08857		70.6894	0.06347		63.002	0.08517		68.5508	0.10249		76.1804	0.08229		66.3544	0.06109		68.0306	0.06235		73.2326	0.06613		77.6254	0.03234					69.649	0.06612		69.938	0.03976		64.736	0.07505		68.9554	0.06824		68.3196	0.04279		81.0356	0.11044
73.1748	0.07275		71.3252	0.08721		74.7932	0.07876		66.0654	0.08857		67.6838	0.08318		62.2506	0.07524		57.7422	0.0523		70.2848	0.05656		59.6496	0.04673		70.0536	0.06087					66.7012	0.04467		77.9722	0.09864		72.539	0.10879		71.0362	0.06069		67.048	0.07124		89.301	0.1021
67.2214	0.07162		73.0592	0.08503		76.7006	0.08825		64.6204	0.0659		81.0356	0.12655		76.9318	0.07091		68.0884	0.08205		82.5384	0.08431		66.0654	0.0342		73.406	0.14785					67.3948	0.05741		55.0256	0.03901		62.5974	0.08902		79.3594	0.08722		74.7932	0.0434		73.5794	0.10127
69.5334	0.06102		78.608	0.07974		66.0076	0.0638		73.6372	0.10161		70.1114	0.07539		62.2506	0.08651		65.4874	0.05922		76.5272	0.06767		56.1816	0.05279		68.2618	0.07104					71.961	0.08285		66.0076	0.07325		79.2438	0.09032		70.4004	0.04916		79.0126	0.04913		77.9144	0.13064
63.5222	0.05906		72.7124	0.09732		75.6602	0.07087		70.516	0.0697		68.5508	0.08235		81.0934	0.08063		78.608	0.07768		80.7466	0.07114		66.9902	0.08007		75.5446	0.07719					62.0772	0.05463		73.4638	0.08117		78.9548	0.09885		79.0126	0.05462		86.4688	0.06598		66.9902	0.08915
66.759	0.06801		74.6198	0.07571		70.516	0.05834		68.6086	0.08134		75.3134	0.07568		66.4122	0.08305		72.0766	0.08163		64.8516	0.0428		58.4358	0.03653		66.2966	0.05888					77.5676	0.04312		66.47	0.04225		62.7708	0.05566		69.1866	0.05636		71.3252	0.06082		87.4514	0.10444
66.8746	0.08465		77.6254	0.08659		73.5794	0.06458		64.8516	0.0926		73.984	0.08265		62.6552	0.08023		77.741	0.08681		72.9436	0.06724		78.4924	0.0679		61.4992	0.07325					66.9324	0.07427		63.9268	0.068		76.296	0.08644		67.7416	0.05251		68.2618	0.05455		81.6136	0.1054
71.9032	0.06322		69.5912	0.07984		65.1406	0.0668		69.1866	0.07774		78.0878	0.081		73.9262	0.08069		68.1462	0.09328		80.1108	0.06114		66.5278	0.10266		78.3768	0.07152					72.1344	0.10209		71.094	0.03123		63.5222	0.08197		64.9672	0.05659		62.0772	0.04447		74.3886	0.09292
70.8628	0.06772		77.7988	0.08426		66.2966	0.09414		75.5446	0.1024		78.9548	0.09488		72.9436	0.07223		62.0772	0.08847		74.7354	0.07899		61.3258	0.05092		62.8864	0.04427					63.6956	0.05826		57.4532	0.03373		65.3718	0.07218		68.4352	0.08009		79.7062	0.06081		73.2904	0.1158
67.048	0.07113		69.938	0.07826		76.1226	0.08539		67.7994	0.07274		73.5216	0.07621		60.6322	0.06922		71.383	0.09033		64.8516	0.05079		55.2568	0.0433		69.1288	0.04864					59.3606	0.05983		70.4582	0.02976		68.2618	0.07252		66.759	0.06176		78.03	0.06911		66.0076	0.11149
66.759	0.08164		76.9896	0.0799		76.9896	0.08372		77.452	0.08824		78.4924	0.08198		60.0542	0.06659		67.337	0.06663		72.0188	0.05917		70.2848	0.07147		73.2326	0.11285					64.736	0.05914		71.9032	0.07811		72.828	0.06356		76.585	0.06899		67.5682	0.05434		86.1798	0.10669
65.314	0.07761		71.1518	0.09717		66.8746	0.07845		70.7472	0.06507		73.3482	0.09784		66.2966	0.08486		72.3078	0.07609		66.47	0.04933		71.4408	0.06687		79.6484	0.04649					69.1288	0.04832		63.4066	0.06159		76.6428	0.07193		66.2966	0.06963		78.5502	0.08694		70.3426	0.10712
66.8746	0.07665		72.6546	0.09563		78.4346	0.08186		67.1636	0.06774		73.2904	0.07217		66.9902	0.08151		74.0418	0.08887		72.25	0.06713		62.9442	0.05289		59.4762	0.05098					58.2624	0.03117		65.4874	0.03127		66.3544	0.06475		63.6378	0.05668		68.0884	0.06449		74.7932	0.10064
69.7068	0.07454		71.8454	0.07081		68.493	0.07479		70.2848	0.07967		65.1406	0.07905		72.0188	0.08479		62.0194	0.07009		72.25	0.06829		60.69	0.0295		66.9902	0.06612					56.0082	0.03187		59.7074	0.05456		66.5856	0.06397		70.5738	0.07153		71.2096	0.04381		75.14	0.09584
67.5682	0.05934		73.2904	0.07628		74.0996	0.07651		65.5452	0.08888		67.7416	0.06934		63.4066	0.07971		76.9896	0.09219		65.1984	0.06184		65.2562	0.0573		76.3538	0.07416					57.7422	0.0405		58.5514	0.05888		68.4352	0.08517		60.3432	0.05693		76.8162	0.05003		73.0592	0.13236
66.0076	0.06738		76.6428	0.07845		74.9666	0.08139		61.3258	0.0712		71.5564	0.07186		62.424	0.06599		71.3252	0.0719		73.3482	0.07623		59.4184	0.0578		68.493	0.0624					60.5166	0.05005		63.3488	0.06529		67.626	0.06936		62.3662	0.06473		83.1742	0.06096
63.4644	0.06381		79.475	0.09257		70.805	0.07857		63.8112	0.08551		67.9728	0.06704		67.7416	0.07408		61.4992	0.06289		70.6316	0.06354		64.2158	0.0422		79.3594	0.11869					56.2394	0.03807		70.0536	0.05434		76.6428	0.08524		63.4066	0.0692		70.805	0.04474
62.424	0.08225		82.8852	0.08556		70.7472	0.06704		62.3662	0.08133		71.2674	0.09091		67.1058	0.07824		74.562	0.08302		72.0766	0.06189		74.5042	0.1146		75.0822	0.07124					62.8286	0.02401		75.3712	0.06414		68.1462	0.06064		72.1922	0.06637		70.6316	0.05492
72.5968	0.07948		83.2898	0.0862		80.5732	0.07177		80.342	0.09153		68.4352	0.07725		67.1058	0.08489		73.695	0.08497		75.6024	0.0643		78.1456	0.09603		72.539	0.07241					73.2326	0.0607		66.5278	0.02915		69.0132	0.05844		63.1176	0.05602		66.0654	0.04442
61.9616	0.06969		78.9548	0.09543		70.5738	0.07161		66.181	0.07836		72.4812	0.06519		67.1058	0.07655		61.6148	0.07638		69.8224	0.06535		59.534	0.03317		58.956	0.05549					59.1294	0.06285		69.649	0.05327		65.6608	0.08111		63.4066	0.06756		65.1984	0.08667
73.8106	0.09069		74.562	0.08527		80.2264	0.06712		63.3488	0.06232		69.7646	0.07902		69.9958	0.0743		75.8336	0.08225		71.5564	0.07186		69.8802	0.07804		71.5564	0.05265					59.245	0.04612		66.8746	0.03584		75.1978	0.07613		66.5856	0.0863		67.8572	0.05845
68.493	0.06781		76.007	0.08029		70.7472	0.07455		70.1114	0.0742		68.6664	0.0874		65.5452	0.06707		73.4638	0.074		70.8628	0.06178		76.1226	0.06244		74.2152	0.08532					69.3022	0.11192		62.8286	0.04394		72.0188	0.08192		67.5682	0.06298		62.0772	0.07009
62.1928	0.06661		73.0592	0.08154		76.7584	0.06732		65.603	0.06778		76.3538	0.07961		70.3426	0.08151		75.2556	0.07582		74.6776	0.09101		62.8864	0.05321		72.4234	0.0549					64.7938	0.0541		72.0188	0.05359		70.5738	0.079		68.8976	0.06917		65.2562	0.04158
65.314	0.05877		72.25	0.08791		67.337	0.06539		69.3022	0.08598		71.2096	0.05441		68.782	0.08608		77.5098	0.08046		74.1574	0.05876		88.6652	0.07106		61.0368	0.03664					72.6546	0.14201		61.2102	0.02924		72.539	0.08495		60.8056	0.04524		73.6372	0.05242
63.869	0.06252		75.7758	0.07965		63.4644	0.07521		64.9094	0.10647		67.9728	0.0739		75.718	0.07872		70.4582	0.08937		68.1462	0.05851		65.7764	0.09624		74.562	0.05008					54.8522	0.03451		62.5396	0.05266		66.47	0.06747		78.2612	0.07083		62.0772	0.04959
72.0766	0.08192		64.0424	0.07858		73.406	0.09583		71.2096	0.09867		77.0474	0.07291		68.493	0.08401		63.6378	0.07248		70.8628	0.06757		65.2562	0.05081		74.6776	0.05904					56.5284	0.04176		60.4588	0.05491		65.4296	0.05972		68.9554	0.06044		64.447	0.03566
64.9672	0.08196		73.9262	0.08982		82.365	0.0814		68.3196	0.07905		72.3078	0.06788		73.3482	0.09271		58.089	0.06668		73.984	0.06601		68.7242	0.07599		65.3718	0.05542					56.4128	0.07884		69.9958	0.06145		65.1406	0.05081		67.1058	0.06588		76.0648	0.09811
58.6092	0.05683		66.47	0.08168		64.3892	0.05764		59.9964	0.07797		69.5334	0.07822		67.915	0.11974		67.3948	0.07802		69.1866	0.06285		68.3196	0.07777		73.117	0.0829					60.69	0.01467		66.5856	0.03134		67.337	0.0572		67.7416	0.07171		76.7584	0.07142
64.9094	0.06352		71.5564	0.09401		75.8336	0.07459		68.204	0.07096		66.181	0.08575		69.2444	0.08573		67.7994	0.1231		77.7988	0.07803		60.2854	0.05862		65.0828	0.08857					69.3022	0.05344		59.8808	0.04811		65.1984	0.06204		64.3314	0.06954		66.1232	0.04368
74.9666	0.07345		68.7242	0.06848		69.5912	0.07167		68.7242	0.09054		71.672	0.08797		74.9666	0.07435		54.332	0.05793		74.0996	0.08179		60.5166	0.0626		71.7298	0.02917					61.4992	0.06268		66.8168	0.03976		66.9324	0.09405		66.47	0.06413		67.3948	0.04297
52.9448	0.06259		73.3482	0.08502		84.0412	0.06936		69.938	0.08527		72.1344	0.0772		72.25	0.09499		73.0592	0.07407		73.4638	0.06566		59.3606	0.02966		77.3942	0.07993					63.7534	0.04		70.2848	0.05692		67.1636	0.07725		69.8802	0.06232		59.245	0.05047
76.585	0.07224		67.4526	0.07491		72.4234	0.06691		73.3482	0.09991		75.0822	0.08846		65.9498	0.06823		72.25	0.08444		58.8404	0.04534		61.4992	0.04849		64.8516	0.05604					67.1058	0.09246		78.3768	0.07889		57.7422	0.06877		76.8162	0.06723		68.6664	0.08153
75.0244	0.08263		73.1748	0.0889		65.3718	0.04947		66.4122	0.07066		68.782	0.06235		66.3544	0.05599		60.8634	0.05993		77.7988	0.09363		67.3948	0.01735		72.0766	0.0464					67.7416	0.06699		64.5626	0.03896		68.8398	0.07628		75.2556	0.05418		72.1922	0.03939
76.007	0.0793		64.5626	0.07446		67.3948	0.07381		62.6552	0.08448		74.3308	0.09016		73.6372	0.0847		77.7988	0.07391		78.9548	0.07715		77.6832	0.03359		72.3078	0.03479					65.025	0.09349		66.0076	0.04732		72.5968	0.07726		58.4936	0.06436		72.8858	0.05391
61.557	0.07118		73.4638	0.08425		74.1574	0.08609		70.227	0.08629		76.8162	0.08599		73.2326	0.07842		68.8398	0.07495		68.204	0.06652		62.5974	0.07009		79.8796	0.15509					66.7012	0.02721		64.447	0.05623		69.4178	0.07284		74.273	0.07927		79.0704	0.06842
66.3544	0.06198		66.8746	0.07869		74.3308	0.07222		67.5104	0.10217		75.6602	0.07661		71.2674	0.07822		62.5974	0.07381		66.5278	0.07302		71.6142	0.15187		65.892	0.05811					73.9262	0.10268		71.7298	0.07318		74.0418	0.07413		72.1344	0.05595		69.36	0.04659
71.672	0.08995		73.0014	0.09079		84.099	0.07995		61.4992	0.09292		69.2444	0.06832		79.8218	0.12016		63.9268	0.07747		72.3078	0.07026		59.245	0.03478		80.3998	0.08416					62.5974	0.05517		64.9672	0.04166		70.1692	0.07517		65.8342	0.06609		74.0996	0.0654
77.741	0.07399		74.273	0.09175		69.4178	0.06964		64.2158	0.08291		78.5502	0.09402		70.1114	0.07264		67.1058	0.0728		73.2904	0.0663		74.5042	0.04145		81.209	0.11844					71.383	0.08068		70.516	0.04661		69.5334	0.09011		76.4694	0.06265		72.828	0.05053
78.2612	0.06994		75.3134	0.08428		76.1226	0.07636		62.6552	0.08749		66.5856	0.08052		59.4184	0.07584		68.1462	0.09012		65.7764	0.07129		71.6142	0.05769		59.823	0.07603					70.6894	0.07664		62.9442	0.05042		66.8168	0.06856		61.7304	0.06358		73.0014	0.07726
71.4986	0.08053		68.2618	0.07342		67.7416	0.0736		72.6546	0.08414		74.9088	0.08719		66.8746	0.07414		77.741	0.08937		66.0654	0.0683		59.1872	0.05929		75.9492	0.0594					70.6316	0.08135		60.6322	0.04296		62.3084	0.06533		67.5682	0.05982		67.626	0.05601
67.8572	0.07279		71.4408	0.09648		73.3482	0.06824		68.204	0.0825		67.5682	0.08655		71.4408	0.08436		62.8864	0.07003		68.1462	0.06033		74.4464	0.0838		63.4066	0.03963					68.7242	0.06025		64.5048	0.04431		65.0828	0.06956		65.8342	0.06899		74.0996	0.04315
59.7074	0.06247		80.053	0.08109		74.7932	0.07424		61.6726	0.08348		75.4868	0.08973		64.7938	0.06565		62.4818	0.07212		66.8746	0.06778		64.7938	0.01514		74.0996	0.0651					62.713	0.02998		62.6552	0.06584		65.8342	0.07931		66.181	0.06377		72.9436	0.06612
73.117	0.08098		75.4868	0.08245		75.429	0.09049		70.3426	0.09123		66.2388	0.07832		64.9094	0.07666		63.58	0.06999		69.071	0.07213		64.6782	0.07702		74.6198	0.04545					69.4756	0.0561		72.3656	0.06689		59.6496	0.07214		66.9902	0.06525		76.4694	0.05811
62.0772	0.06944		68.3196	0.09005		67.4526	0.08216		65.7186	0.08535		75.0244	0.08566		70.1114	0.07446		66.759	0.07592		70.9206	0.07063		65.5452	0.05575		72.1344	0.07609					75.2556	0.06259		68.8976	0.08353		68.0884	0.06801		65.1406	0.05089		76.9896	0.05612
68.204	0.05743		78.1456	0.07212		71.6142	0.07705		66.7012	0.08219		64.3892	0.07437		72.7124	0.07951		65.7764	0.07232		67.8572	0.05454		56.4128	0.05328		74.273	0.03507					58.956	0.03952		64.1002	0.04693		61.557	0.06454		69.071	0.05684		74.9666	0.08402
64.3892	0.05269		76.4116	0.08788		79.5906	0.07366		67.1636	0.08975		85.1394	0.08206		75.429	0.10514		62.7708	0.05608		74.1574	0.07518		69.8802	0.04522		63.9268	0.0553					69.0132	0.04707		65.025	0.03533		72.539	0.07121		69.071	0.06853		65.025	0.04896
74.6776	0.08416		69.7646	0.07213		70.6894	0.06804		60.9212	0.069		70.1114	0.08618		72.1344	0.09331		70.516	0.07813		74.9666	0.08047		74.3308	0.1576		69.4178	0.0521					59.1294	0.05368		72.4234	0.0344		65.9498	0.06867		70.9206	0.05674		67.7416	0.07875
72.9436	0.06787		67.1058	0.09153		78.319	0.07456		74.851	0.07888		79.6484	0.09683		64.3314	0.08737		63.869	0.08366		63.002	0.05398		64.1002	0.04432		63.58	0.07971					61.6726	0.06331		63.9268	0.04063		69.1288	0.07307		69.1288	0.06712		74.6776	0.02975
68.8976	0.07384		74.6198	0.08296		71.8454	0.08204		72.0766	0.08556		78.4346	0.08678		67.337	0.09302		72.539	0.07687		68.4352	0.06672		62.9442	0.06015		67.048	0.04923					64.2158	0.0589		61.846	0.03678		69.4756	0.08175		73.5794	0.06896		71.4408	0.05665
67.915	0.06617		71.383	0.08434		70.7472	0.09337		76.7006	0.10172		60.2854	0.05986		67.915	0.08947		65.3718	0.06338		73.117	0.06013		61.0368	0.03851		80.2264	0.04687					69.9958	0.10891		71.4408	0.07257		63.5222	0.05846		73.4638	0.07796		71.3252	0.06428
66.2966	0.06061		75.8914	0.09303		73.2904	0.07074		79.186	0.07768		70.0536	0.07423		61.6726	0.08071		63.002	0.07184		67.915	0.05531		63.2332	0.08572		66.2388	0.07888					69.7068	0.08727		64.447	0.03523		80.342	0.07188		73.406	0.0728		63.1754	0.0589
70.516	0.07374		81.209	0.0998		78.8392	0.07096		75.5446	0.08313		79.8796	0.08041		78.9548	0.07742		76.4694	0.08154		77.2786	0.06894		65.4296	0.10171		67.1058	0.05445					63.2332	0.03623		72.4234	0.04672		62.5974	0.04624		66.8168	0.07266		80.3998	0.07518
66.8168	0.07175		69.9958	0.09062		68.6086	0.07995		66.5278	0.08015		66.1232	0.08203		74.9666	0.07077		65.4296	0.083		77.7988	0.07479		67.3948	0.06317		67.7416	0.03563					67.7416	0.07141		86.1798	0.08128		71.672	0.05847		65.7764	0.07233		73.695	0.06101
71.8454	0.07756		69.9958	0.07131		72.3656	0.07274		73.0014	0.0988		69.4756	0.08314		64.3892	0.0741		67.1058	0.08391		73.695	0.07876		74.5042	0.05185		78.7236	0.04234					72.1344	0.08491		61.4414	0.03828		73.7528	0.07225		69.3022	0.05795		71.5564	0.05668
69.5334	0.07085		71.672	0.08843		66.7012	0.0762		74.3308	0.08477		64.736	0.06426		69.7646	0.08287		73.695	0.07849		70.1114	0.07163		68.4352	0.07213		75.429	0.09045					75.718	0.068		67.4526	0.04687		66.47	0.04935		63.8112	0.06178		68.493	0.06281
77.452	0.06879		73.6372	0.07329		75.6602	0.07779		60.8056	0.07746		65.7186	0.07639		68.7242	0.08564		70.0536	0.09294		73.8684	0.07709		66.5278	0.05419		61.9616	0.08699					65.7186	0.05503		59.5918	0.04143		64.0424	0.07403		68.1462	0.05733		69.1866	0.06671
75.1978	0.06178		66.5856	0.08056		65.8342	0.07623		67.2214	0.0718		69.4756	0.06802		74.4464	0.08867		65.603	0.06205		73.9262	0.06767		61.7304	0.02612		80.6888	0.064					76.9318	0.05766		63.869	0.0551		68.6086	0.07253		70.6894	0.06073		68.8976	0.0765
63.9846	0.06213		68.5508	0.08839		81.0356	0.07985		71.4408	0.09599		69.8802	0.0673		72.4234	0.09129		71.383	0.07074		73.8684	0.08006		70.4004	0.03504		61.0946	0.05864					53.9852	0.0495		63.9268	0.04271		68.493	0.08053		70.805	0.07081		64.6204	0.05369
65.5452	0.05878		67.6838	0.07282		79.7062	0.08397		62.0194	0.06952		69.36	0.07067		62.713	0.06892		72.6546	0.06894		68.493	0.07469		65.3718	0.04938		77.8566	0.05797					70.7472	0.06852		74.0418	0.08629		67.915	0.06608		70.6316	0.05295		70.516	0.05263
67.9728	0.07626		80.7466	0.07052		79.6484	0.084		65.2562	0.07741		86.0064	0.10176		68.9554	0.08773		61.4414	0.06743		72.3078	0.08323		64.6782	0.05633		64.3892	0.04863					67.5104	0.07266		63.1176	0.05832		67.2214	0.09921		74.9666	0.06727		69.8802	0.06449
67.5682	0.06146		78.608	0.07141		75.4868	0.08001		78.1456	0.07601		66.4122	0.06395		62.8286	0.08772		71.2674	0.08968		69.1288	0.05097		64.2736	0.03769		82.8852	0.05717					68.0884	0.0849		69.8224	0.06072		64.7938	0.06006		78.0878	0.07704		67.337	0.06227
71.8454	0.06887		64.3314	0.07264		75.1978	0.07533		69.0132	0.09844		78.2612	0.07918		63.7534	0.08504		68.8398	0.08186		74.3886	0.0821		72.8858	0.0663		79.3594	0.06639					62.135	0.05681		75.14	0.05894		60.5166	0.08527		76.7006	0.08098		80.4576	0.0695
64.9672	0.06455		60.5744	0.07675		64.2158	0.0556		71.8454	0.08192		76.8162	0.09297		66.9902	0.0903		71.4408	0.0771		78.2034	0.0742		61.268	0.03998		66.8746	0.06564					70.5738	0.06707		71.2674	0.0428		61.6148	0.06267		70.4582	0.05928		73.5216	0.09058
69.7068	0.06717		75.718	0.07273		68.204	0.08315		71.2674	0.06937		67.1058	0.07779		71.7298	0.08308		80.7466	0.06934		69.36	0.06387		69.8224	0.05554		74.562	0.08235					65.4874	0.03298		72.828	0.05965		68.782	0.0602		71.7876	0.05511		72.3656	0.07616
63.2332	0.062		75.8914	0.09163		69.5912	0.06779		74.273	0.0804		79.9374	0.08473		73.5216	0.0813		71.4408	0.08444		68.2618	0.07515		71.9032	0.07036		81.4402	0.04041					71.5564	0.091		79.1282	0.11758		73.5216	0.08254		66.0654	0.07231		69.5912	0.05024
65.7764	0.0684		82.4228	0.08674		71.7876	0.0752		72.7702	0.09421		60.8056	0.06449		71.4986	0.08363		66.0654	0.08551		66.8746	0.05658		68.2618	0.03737		68.782	0.037					68.8398	0.07238		70.8628	0.0568		68.0306	0.07005		73.2326	0.08937		66.4122	0.06568
75.429	0.06917		73.0592	0.08415		79.0704	0.08794		60.5166	0.07579		68.0306	0.06666		63.9268	0.08361		71.4986	0.07499		69.5334	0.07273		75.6024	0.08145		78.7814	0.06193					73.0592	0.07478		69.8224	0.07664		65.0828	0.08102		62.8864	0.07062		67.2214	0.04912
75.3712	0.07711		66.9902	0.08553		64.9672	0.07649		63.1754	0.07935		64.1002	0.08507		76.874	0.07745		74.562	0.08092		74.5042	0.0698		70.8628	0.07304		67.5682	0.05687					59.823	0.07707		66.4122	0.04626		65.9498	0.07112		69.938	0.08365		76.2382	0.05735
68.493	0.06318		79.8796	0.08122		71.094	0.07672		73.117	0.07975		73.4638	0.07589		71.4408	0.07595		68.3196	0.05961		67.2792	0.05304		70.3426	0.08408		76.7006	0.07654					74.6198	0.15126		73.5216	0.06524		71.7298	0.0726		66.181	0.07746		61.846	0.02925
68.1462	0.06573		71.8454	0.09458		72.4234	0.06709		68.6086	0.0741		75.1978	0.0894		67.1636	0.0868		65.3718	0.06612		70.6316	0.06488		70.6316	0.08982		60.5744	0.06095					63.4066	0.06695		65.8342	0.06506		66.9902	0.06718		77.2786	0.06708		82.8852	0.06123
65.314	0.07363		72.3078	0.07546		64.7938	0.072		66.759	0.08273		69.9958	0.09631		71.094	0.09244		65.6608	0.06065		67.5104	0.05968		67.048	0.08224		65.8342	0.08836					65.025	0.04397		65.4874	0.03757		69.5912	0.08432		61.4414	0.06436		67.915	0.05008
67.8572	0.06724		76.4116	0.09518		71.7876	0.07482		75.4868	0.08902		60.7478	0.07714		78.9548	0.0956		68.5508	0.08288		68.6664	0.06393		60.1698	0.07256		76.1804	0.12567					68.8398	0.07108		79.5328	0.07373		69.7646	0.07831		72.25	0.05373		71.2096	0.07408
74.2152	0.0829		69.9958	0.07583		76.6428	0.06378		76.874	0.07892		74.7932	0.0816		66.9902	0.08535		67.7994	0.07463		65.9498	0.06236		64.3892	0.05867		69.36	0.05547					67.6838	0.0757		66.4122	0.02336		70.227	0.1081		62.2506	0.05679		65.603	0.04872
73.0592	0.082		71.383	0.09654		67.7416	0.08023		72.0188	0.07436		72.0188	0.06945		67.1636	0.0955		76.8162	0.0817		79.9374	0.07655		71.4986	0.04996		61.0368	0.05247					65.025	0.09196		69.8802	0.03437		70.4004	0.08114		64.2158	0.04972		59.6496	0.04798
68.1462	0.06507		69.2444	0.09227		67.7416	0.07205		65.9498	0.07337		66.4122	0.07308		66.8168	0.09301		70.4004	0.08136		69.5334	0.07156		69.3022	0.07394		72.9436	0.07988					67.626	0.10637		68.0306	0.08059		68.5508	0.08192		64.6782	0.05371		77.741	0.06983
67.1636	0.06839		65.2562	0.07758		73.3482	0.08549		74.9088	0.08239		68.3196	0.06935		63.6378	0.07221		72.7124	0.07007		77.6832	0.06548		67.8572	0.04288		68.7242	0.06901					62.1928	0.04587		61.9616	0.05701		74.273	0.08683		71.7298	0.05779		69.3022	0.05948
70.0536	0.08504		71.1518	0.07879		65.7764	0.07565		66.9324	0.0871		66.1232	0.07608		67.5104	0.08808		63.7534	0.05384		67.8572	0.06445		69.071	0.08523		73.5794	0.06111					75.0822	0.07806		68.3774	0.03525		62.9442	0.08059		63.1176	0.05687		68.4352	0.07132
66.9324	0.07692		77.2786	0.07635		67.5682	0.07094		69.4756	0.08121		75.3134	0.07186		68.204	0.10093		76.6428	0.08581		69.938	0.07118		60.112	0.03438		69.938	0.04175								67.6838	0.05391		75.9492	0.07322		64.3314	0.05937		72.7124	0.07515
62.1928	0.06648		67.5104	0.07386		71.8454	0.06706		68.782	0.09565		70.7472	0.07469		62.8286	0.06801		63.9846	0.07002		72.7702	0.08121		66.0654	0.07134		79.5328	0.04991								66.8746	0.05518		63.58	0.05759		64.6204	0.05376		72.9436	0.03635
77.9144	0.07573		61.3258	0.06501		79.5328	0.08693		71.2674	0.08581		69.1288	0.08394		70.5738	0.07777		68.9554	0.07646		65.4874	0.06413		61.6726	0.05269		75.8914	0.06393								70.1114	0.06408		58.956	0.05024		69.4756	0.07183		62.135	0.04906
67.626	0.0779		77.3364	0.0967		73.4638	0.0843		68.3196	0.07773		78.319	0.08153		69.8224	0.08684		69.2444	0.08288		72.3656	0.05921		71.3252	0.04464		75.429	0.07855								77.9722	0.05915		62.9442	0.06972		63.6956	0.05871		64.447	0.05754
62.4818	0.06316		68.7242	0.07523		70.6894	0.08947		65.0828	0.07892		72.8858	0.0855		65.1984	0.07409		70.516	0.08002		68.493	0.0646		62.135	0.05783		62.424	0.04404								67.337	0.03769		69.4756	0.07481		62.0194	0.06029		72.6546	0.05438
71.7876	0.07308		67.337	0.07395		72.5968	0.061		61.3836	0.06189		78.7236	0.0799		63.1754	0.08241		67.2214	0.07771		65.0828	0.06046		67.4526	0.0542		65.5452	0.07715								64.2158	0.03144		66.9324	0.07129		72.0766	0.07229		68.493	0.0764
77.1052	0.06866		68.3774	0.07852		73.406	0.0943		65.1406	0.07104		67.337	0.09553		72.828	0.10236		66.181	0.08104		65.6608	0.07339		62.5396	0.04344		71.7298	0.08483								66.4122	0.06271		66.6434	0.07178		76.2382	0.06264		68.0884	0.06903
65.4296	0.06852		74.2152	0.0822		79.764	0.07502		65.2562	0.06014		71.2096	0.08402		62.8864	0.0712		70.1114	0.06733		69.5334	0.0523		60.3432	0.05908		74.0418	0.04793								60.979	0.06563		69.8802	0.08505		74.3886	0.05943		67.048	0.06684
64.3892	0.06812		75.7758	0.09472		78.6658	0.06862		73.0592	0.0898		69.3022	0.10702		66.0654	0.0943		68.204	0.09146		71.6142	0.06888		61.557	0.06537		63.291	0.04638								64.1002	0.05842		64.6204	0.06579		64.1002	0.05625		68.6086	0.06762
75.0244	0.07695		73.7528	0.08401		68.0306	0.07072		67.3948	0.10004		75.429	0.07961		81.2668	0.08879		71.094	0.07011		68.6086	0.0688		71.1518	0.05734		75.718	0.05241								60.6322	0.03969		75.6602	0.05893		69.2444	0.05893		70.6894	0.08532
62.9442	0.06033		72.9436	0.09877		65.603	0.08112		73.8106	0.08125		74.562	0.08676		66.47	0.07456		70.4004	0.07354		71.2096	0.07763		62.2506	0.072		81.2668	0.0678								63.869	0.07563		68.9554	0.07553		67.2792	0.09604		76.3538	0.05322
64.7938	0.06588		68.782	0.07641		73.117	0.09012		61.268	0.06323		73.4638	0.07335		76.007	0.10076		74.1574	0.07596		77.7988	0.07815		59.534	0.06794		67.8572	0.05186								69.36	0.03934		69.8802	0.07133		61.1524	0.05424		73.117	0.06262
62.7708	0.05817		83.5788	0.08503		69.7068	0.08771		60.401	0.06303		69.4178	0.09226		72.3078	0.08276		78.9548	0.08331		69.4756	0.05508		74.1574	0.06398		73.406	0.03773								63.2332	0.04644		67.2792	0.08376		69.36	0.06624		63.002	0.06939
76.5272	0.07129		81.9604	0.09369		67.915	0.07666		66.4122	0.08193		79.8218	0.09319		69.8802	0.10851		64.736	0.057		80.3998	0.0879		65.603	0.03515		70.0536	0.04446								71.094	0.05038		72.5968	0.0786		69.7068	0.08036		78.1456	0.05505
75.429	0.06496		69.4178	0.07992		75.7758	0.08594		65.603	0.06522		69.7068	0.07524		70.4004	0.06588		77.6254	0.07419		68.2618	0.09531		60.979	0.05834		69.5912	0.06692								73.8106	0.05515		70.516	0.07848		66.2388	0.06389		65.2562	0.03651
62.1928	0.0468		81.3824	0.08581		73.9262	0.06057		60.3432	0.07937		66.0654	0.06493		69.1288	0.07416		69.649	0.07826		71.4986	0.07802		58.4358	0.07205		81.7292	0.04267								59.7074	0.04953		69.5912	0.0951		73.117	0.07902		75.9492	0.06433
68.5508	0.06659		68.6664	0.08422		71.4986	0.08692		70.4582	0.07284		68.782	0.06892		65.3718	0.0782		61.7304	0.06772		69.071	0.06979		66.6434	0.06585		68.6664	0.04634								69.1866	0.04931		71.094	0.05061		60.2854	0.06399		79.2438	0.08151
67.7416	0.0687		82.2494	0.08219		72.3078	0.07547		72.828	0.08128		73.695	0.07368		70.1692	0.082		63.1176	0.07378		73.406	0.09263		59.534	0.0489		77.3942	0.06548								72.7702	0.04652		68.5508	0.11448		69.4178	0.07153		73.3482	0.06563
70.1692	0.07344		69.3022	0.07887		76.4694	0.0801		67.6838	0.08222		77.741	0.08151		68.493	0.07099		72.0188	0.07476		71.2096	0.07617		73.7528	0.05877		68.1462	0.0272								85.1394	0.08362		69.3022	0.06374		60.6322	0.06106		79.5328	0.06199
67.9728	0.06539		76.9896	0.08731		69.5912	0.07411		66.1232	0.07375		64.5626	0.0636		72.0188	0.09165		62.5974	0.06604		65.7764	0.06292		68.0884	0.04136		76.1226	0.06037								76.296	0.05962		64.158	0.05476		65.1984	0.07255		70.4582	0.032
70.1114	0.08187		64.9094	0.06676		73.8684	0.06095		75.429	0.07961		72.3656	0.09792		69.4178	0.08322		71.672	0.07562		78.7814	0.08252		65.8342	0.06004		69.7646	0.03356								69.938	0.04271		67.337	0.07538		69.1866	0.05663		73.5794	0.06191
64.158	0.09189		72.4234	0.08835		75.0244	0.08492		62.5974	0.08272		66.0654	0.07917		68.4352	0.08632		62.8864	0.07562		73.0592	0.05257		61.4414	0.04472		78.03	0.05331								78.4924	0.08193		64.2158	0.05726		66.8746	0.06877		73.2326	0.06311
66.7012	0.08243		68.2618	0.09403		71.0362	0.06708		61.6726	0.07412		72.4234	0.08394		75.2556	0.08723		68.3774	0.05742		75.2556	0.06888		64.736	0.04647		63.58	0.07586								72.25	0.06895		72.4234	0.06785		73.406	0.06785		66.8168	0.06371
71.0362	0.07396		78.897	0.07053		70.1114	0.0918		61.6148	0.08214		81.1512	0.07929		72.4812	0.09468		69.071	0.07206		63.4644	0.05517		68.7242	0.10686		78.4346	0.09053								63.4644	0.03864		67.048	0.08298		66.0654	0.05814		79.2438	0.06666
71.0362	0.07723		73.0592	0.07587		60.401	0.05969		68.6664	0.09008		68.2618	0.08179		76.1226	0.08795		61.6726	0.06855		83.0586	0.06448		62.8286	0.04609		63.4644	0.0544								62.3662	0.0425		68.8398	0.08007		65.314	0.06489		67.1636	0.08853
69.071	0.07141		67.1636	0.08498		76.2382	0.07438		67.5682	0.08574		72.3078	0.07655		67.626	0.06786		65.3718	0.07316		77.0474	0.06017		68.9554	0.04807		75.5446	0.07439								60.979	0.04618		65.7186	0.07172		64.3314	0.06366		66.0654	0.05311
70.5738	0.07854		66.2966	0.08046		64.3314	0.05969		72.0766	0.10172		68.782	0.07635		77.163	0.09026		69.1288	0.08759		71.4408	0.06949		62.3084	0.07516		71.7298	0.06686								70.8628	0.0627		60.3432	0.06938		63.1754	0.06829		74.562	0.06726
69.7646	0.0737		68.0306	0.07187		65.892	0.06316		78.7236	0.09092		76.6428	0.08391		76.4694	0.09074		71.1518	0.05715		76.296	0.07865		65.025	0.08872		69.938	0.06962								62.8286	0.04919		60.979	0.06964		66.8746	0.06414		72.25	0.05594
77.7988	0.07351		64.6782	0.09171		73.3482	0.08785		63.8112	0.07112		66.47	0.06888		72.9436	0.08411		71.3252	0.08105		65.892	0.05392					69.4178	0.03699								71.094	0.0605		76.4116	0.08127		64.7938	0.06979		71.3252	0.05934
65.9498	0.06872		68.8398	0.08349		66.3544	0.06146		71.3252	0.08289		70.9784	0.06181		64.9672	0.07872		72.539	0.08108		67.2214	0.0715					67.1636	0.0339								59.3606	0.03382		65.1984	0.08187		77.9722	0.06317		58.4358	0.05417
66.3544	0.07477		68.1462	0.07845		65.892	0.07481		69.8224	0.08352		80.4576	0.083		65.4296	0.10648		67.5682	0.07881		66.8746	0.05624					86.989	0.06186								62.8286	0.03921		70.516	0.08021		66.3544	0.05372		61.6148	0.04988
65.4296	0.0583		79.8796	0.09316		81.7292	0.08772		64.7938	0.06897		76.296	0.08632		66.2388	0.09012		73.4638	0.0689		70.6316	0.06575					81.3824	0.07889								69.8802	0.07889		65.4296	0.07706		68.3774	0.07424		67.2214	0.07151
61.7882	0.06979		73.3482	0.08379		67.8572	0.06431		72.1344	0.10834		83.4632	0.0824		61.0368	0.07016		59.6496	0.0665		76.1226	0.07285					68.3196	0.08644								77.163	0.08561		68.3196	0.07241		67.7416	0.06279		74.3308	0.08286
62.1928	0.06709		76.9896	0.10928		79.2438	0.0786		71.5564	0.06899		79.3594	0.08768		67.626	0.0722		63.291	0.07802		63.2332	0.07892					83.0008	0.0779								65.025	0.0398		67.2792	0.05939		72.7124	0.04907		72.9436	0.05792
83.1164	0.07881		77.8566	0.07784		75.6024	0.08254		57.1642	0.05835		68.9554	0.07689		72.3078	0.07371		55.8348	0.06243		71.7876	0.06223					70.8628	0.06121								60.9212	0.03112		67.2792	0.07104		66.3544	0.07584		76.296	0.07349
72.0188	0.06773		68.2618	0.07232		77.163	0.05838		77.9144	0.08737		81.0356	0.10534		73.0592	0.07305		73.5216	0.06978		67.5104	0.05724					67.626	0.06326								74.0996	0.0745		68.3774	0.06487		72.1922	0.07344		71.961	0.06717
73.0592	0.09231		73.9262	0.08199		65.0828	0.06493		74.5042	0.08204		63.58	0.0692		69.649	0.07821		65.314	0.08881		64.9672	0.05104					60.112	0.07573								71.3252	0.07		68.7242	0.05733		65.7764	0.04794		73.8684	0.07464
67.337	0.08527		65.4296	0.08266		78.6658	0.08218		70.4004	0.08594		84.0412	0.09647		56.2972	0.07191		75.6024	0.08099		78.2034	0.0584					69.2444	0.10355								75.6024	0.10363		78.897	0.0681		72.0766	0.09159		68.3774	0.05664
76.9318	0.08753		79.764	0.07416		72.3078	0.08639		79.4172	0.09912		64.6782	0.07739		64.3892	0.06288		68.7242	0.07845		77.8566	0.07139					64.3892	0.07501								62.5396	0.04454		64.9094	0.07325		71.4408	0.0738		68.9554	0.07496
71.4986	0.06146		75.5446	0.08525		71.2674	0.08279		69.938	0.0822		71.3252	0.07387		67.2214	0.08368		69.3022	0.08335		66.0654	0.07233					60.8634	0.04407								69.2444	0.04394		66.5856	0.08262		69.0132	0.07242		64.6782	0.04319
63.9846	0.07999		69.649	0.09765		69.1866	0.07953		67.1058	0.06549		71.5564	0.07895		61.6726	0.06324		73.3482	0.08135		66.181	0.07036					73.0592	0.0392								63.0598	0.06113		73.695	0.09691		65.4296	0.06273		64.6782	0.05913
67.4526	0.0711		75.8336	0.0837		61.6726	0.06643		60.3432	0.0678		72.7124	0.08906		76.874	0.08439		72.6546	0.08325		65.0828	0.06504					69.36	0.06471								72.539	0.06102		64.7938	0.07291		73.8106	0.06284		64.7938	0.09554
68.2618	0.08472		68.782	0.08005		69.1288	0.06689		70.7472	0.07635		79.475	0.08346		62.9442	0.08238		65.0828	0.07711		76.9318	0.08123					82.4228	0.06268								68.0884	0.03864		66.8168	0.06216		77.0474	0.07953		71.0362	0.06019
64.0424	0.0721		71.8454	0.07911		71.383	0.07205		59.0716	0.07441		69.0132	0.08195		75.14	0.06892		69.7646	0.08326		71.4408	0.06521					70.8628	0.08352								73.8684	0.07659		71.4408	0.07611		74.4464	0.06807		73.984	0.04975
68.2618	0.07593		84.1568	0.08451		73.6372	0.06401		68.9554	0.08779		64.0424	0.07159		69.0132	0.07202		76.9896	0.08771		81.2668	0.08943					73.117	0.02862								75.0822	0.07686		63.1176	0.07927		63.0598	0.08923		72.7124	0.06423
75.6024	0.06202		68.5508	0.09339		71.7876	0.07636		71.2096	0.08946		64.7938	0.05641		69.9958	0.06593		73.695	0.08157		63.6378	0.06621					69.938	0.10903								68.2618	0.04274		71.672	0.07011		73.7528	0.03961		67.6838	0.0635
73.4638	0.08213		73.984	0.08284		69.071	0.08011		69.4756	0.07368		75.0244	0.07484		67.915	0.08829		73.117	0.08136		71.7876	0.06837					71.7298	0.07564								65.0828	0.02475		68.782	0.08409		74.273	0.05395		74.851	0.07414
68.5508	0.07034		70.516	0.07481		64.6782	0.06498		70.6316	0.06698		65.5452	0.06878		68.5508	0.07968		64.447	0.05839		69.1288	0.06856					73.9262	0.08104								67.1058	0.08406		60.8056	0.05813		74.1574	0.05547		69.36	0.06117
67.1058	0.0792		69.7646	0.08044		73.8684	0.0861		61.7304	0.0721		68.204	0.06676		76.8162	0.11063		68.9554	0.06077		67.7416	0.07145					71.7298	0.05026								66.759	0.04701		60.6322	0.07047		65.0828	0.07272		70.9784	0.05713
70.2848	0.07027		72.7124	0.08887		72.7124	0.08462		71.3252	0.07908		74.273	0.08074		65.4874	0.06925		69.9958	0.074		71.6142	0.0637					73.6372	0.07556								75.5446	0.05332		60.7478	0.06977		65.1984	0.07933		75.3712	0.064
63.291	0.06869		71.094	0.08663		77.1052	0.09923		79.1282	0.09338		80.342	0.09063		72.0188	0.07499		76.7584	0.085		79.5906	0.07053					73.2326	0.08149								59.4762	0.03859		61.3258	0.06585		63.869	0.06345		67.7416	0.0729
59.6496	0.05134		86.411	0.10143		72.4234	0.06592		62.3662	0.0637		68.4352	0.08592		59.7652	0.06417		69.0132	0.07261		70.2848	0.07433					68.1462	0.06611								70.9784	0.08469		70.5738	0.0728		66.2388	0.0516		75.3134	0.07516
64.7938	0.05858		80.2264	0.08652		68.5508	0.06185		76.9318	0.09397		68.5508	0.07286		56.8752	0.08124		66.9902	0.07805		65.603	0.05457					67.7994	0.07049								77.3942	0.09145		66.5856	0.052		70.4582	0.06204		62.3084	0.05473
71.5564	0.07633		75.6602	0.09041		68.1462	0.07091		63.869	0.07292		66.8168	0.06748		65.603	0.07665		67.915	0.09984		65.3718	0.04946					59.3028	0.0277								63.002	0.08527		67.5104	0.08299		71.5564	0.06952		71.4408	0.07732
65.603	0.08157		77.163	0.09129		79.5906	0.08675		64.7938	0.09187		67.3948	0.07248		70.4004	0.08971		63.6378	0.07881		69.1288	0.06879					77.7988	0.04842								72.3656	0.06857		68.4352	0.07874		57.3954	0.04231		74.9666	0.03783
63.9846	0.07469		75.8336	0.09968		72.8858	0.07901		66.0654	0.06704		74.851	0.08308		69.8802	0.08635		72.6546	0.07029		73.406	0.07028					74.2152	0.06466								66.0076	0.06355		61.3258	0.06562		72.0766	0.05875		69.071	0.03671
65.892	0.05831		68.8976	0.09663		69.938	0.06766		61.0946	0.07267		77.1052	0.08548		63.4644	0.07431		64.5626	0.07517		67.6838	0.07806					63.7534	0.04434								65.9498	0.06132		63.8112	0.0664		69.2444	0.07032		75.7758	0.08454
64.158	0.06429		68.0884	0.07455		73.695	0.07366		70.2848	0.08933		74.9088	0.08878		73.984	0.10124		69.5912	0.07992		70.2848	0.07794					75.4868	0.05395								59.3606	0.03477		72.9436	0.06191		64.1002	0.0613		76.9318	0.0676
67.915	0.06552		70.9784	0.08236		71.383	0.07299		69.4756	0.08691		61.3258	0.07975		64.7938	0.06603		68.782	0.0627		68.7242	0.08124					69.5334	0.03238								62.424	0.06645		62.8286	0.07742		64.447	0.06321		76.3538	0.05322
65.4874	0.0606		65.025	0.08263		74.7932	0.0858		69.1866	0.09237		71.5564	0.0861		66.7012	0.07626		70.1114	0.06655		65.4874	0.07035					65.314	0.04649								70.4582	0.04759		65.4874	0.08962		62.4818	0.05818		70.1692	0.06347
65.1984	0.06692		85.6018	0.09716		72.1344	0.06847		59.534	0.06879		74.3308	0.09242		76.9896	0.06726		73.6372	0.09007		71.9032	0.07391					76.3538	0.05745								67.626	0.0558		69.1288	0.07329		67.1636	0.06113		69.3022	0.08152
72.7702	0.08467		76.9896	0.07852		78.6658	0.08286		74.3308	0.07602		70.227	0.07458		62.2506	0.06795		71.2096	0.07812		60.9212	0.0474					63.58	0.0359								73.9262	0.05467		60.5744	0.06633		63.9846	0.06267		80.7466	0.06477
72.3078	0.0669		78.3768	0.09429		63.7534	0.05481		74.5042	0.0746		80.1108	0.09769		56.355	0.10177		63.3488	0.07883		67.337	0.08432					67.337	0.02768								69.7646	0.08604		71.672	0.08823		62.5974	0.06596		72.3656	0.04525
68.6664	0.07435		76.874	0.08055		66.4122	0.07629		61.6148	0.08791		60.979	0.07431		69.7646	0.07936		64.2736	0.07445		74.9088	0.06946					75.9492	0.0731								63.9846	0.04585		60.5744	0.08228		80.5154	0.03685		70.4004	0.07143
65.892	0.06977		72.8858	0.09355		66.5856	0.07215		64.9672	0.07954		66.9324	0.08299		66.7012	0.07469		64.158	0.06818		66.181	0.05793					68.6086	0.04986								71.3252	0.04539		64.158	0.08752		61.557	0.04826		68.782	0.06715
74.562	0.07412		71.9032	0.08119		82.0182	0.06334		64.6204	0.08422		69.8802	0.07045		75.14	0.0799		67.7416	0.08123		67.7416	0.06549					69.7646	0.06217								63.9846	0.0704		65.314	0.07854		66.2966	0.04256		61.557	0.08137
67.626	0.06335		70.4582	0.07466		69.8224	0.08102		66.2966	0.0752		73.3482	0.07063		69.5912	0.08041		71.7876	0.08927		69.3022	0.05711					64.3892	0.08062								67.2214	0.04962		68.3774	0.08183		70.805	0.06499		70.1114	0.03639
68.3196	0.05931		77.1052	0.07867		66.8168	0.08139		69.5912	0.08294		81.498	0.09127		70.1114	0.08564		64.447	0.08193		65.314	0.05684					62.4818	0.03721								81.4402	0.04733		68.493	0.08434		62.8864	0.05703		66.181	0.07404
71.4408	0.07168		79.9374	0.08882		70.9206	0.09869		66.6434	0.08328		80.8044	0.0856		66.5278	0.06319		70.8628	0.07225		75.8336	0.06734					69.8224	0.07105								61.7304	0.05122		64.158	0.07944		67.9728	0.07748		71.2674	0.06555
76.3538	0.08539		80.8622	0.08688		70.9206	0.07076		73.0014	0.07977		74.0418	0.08214		72.4234	0.07904		71.7298	0.08442		67.4526	0.06816					75.8336	0.08532								68.3774	0.07169		64.5626	0.06284		65.892	0.05736		61.9038	0.07547
71.9032	0.08077		65.4874	0.07991		76.296	0.06991		65.6608	0.07969		65.7186	0.08581		65.314	0.09111		74.7932	0.09489		67.5682	0.05871					80.2842	0.05554								71.7876	0.08247		60.2854	0.05359		63.1176	0.06112		63.3488	0.08055
68.782	0.06949		84.388	0.07639		73.5794	0.07791		71.4986	0.07		77.6832	0.082		64.447	0.0818		71.2096	0.08654		71.3252	0.06941					62.8286	0.05356								62.2506	0.05956		68.204	0.1153		72.7702	0.0668		66.759	0.06455
73.9262	0.07658		72.4234	0.1		77.741	0.06834		71.961	0.0755		74.7932	0.07482		73.8106	0.07154		62.713	0.09742		67.626	0.06034					67.915	0.04523								66.181	0.03279		62.7708	0.07376		66.2388	0.098		67.5682	0.06605
76.4694	0.06966		73.1748	0.08022		74.5042	0.0668		68.1462	0.09261		70.6316	0.0696		60.979	0.0671		65.4296	0.0799		73.6372	0.08138					70.3426	0.0858								64.2736	0.05508		66.8746	0.07207		73.8106	0.07581		69.5912	0.09824
73.117	0.07446		71.672	0.08259		65.7186	0.05792		72.25	0.11215		81.9026	0.08626		59.823	0.06607		79.0704	0.07914		66.759	0.07013					75.4868	0.05753								70.5738	0.04384		69.4756	0.07375		63.1176	0.07509		65.314	0.04939
71.5564	0.07544		75.7758	0.0943		68.6086	0.05437		68.3774	0.08188		73.984	0.08509		63.7534	0.09673		68.4352	0.08219		82.4806	0.08067					62.713	0.05511								63.1176	0.05859		72.4234	0.07387		72.3656	0.06803		62.9442	0.06799
64.5048	0.06495		83.7522	0.08361		66.1232	0.06226		67.1058	0.07188		72.7124	0.07655		67.4526	0.08192		66.5278	0.06815		70.2848	0.07097					65.025	0.05504								68.2618	0.04665		73.984	0.08212		72.8858	0.06664		71.5564	0.05362
65.3718	0.08908		70.3426	0.08224		68.7242	0.07015		66.2966	0.08023		67.915	0.06816		68.7242	0.08112		65.9498	0.06913		78.7814	0.07451					69.7068	0.05434								60.69	0.04425		72.4812	0.06812		75.718	0.05154		68.6086	0.08295
66.6434	0.06598		75.9492	0.09766		83.4054	0.06647		66.7012	0.06994		66.9902	0.07139		72.4234	0.07701		71.961	0.09093		64.9094	0.05253					65.4296	0.07102								73.8106	0.06723		67.626	0.0785		69.7068	0.06668		71.6142	0.06693
77.7988	0.07952		67.915	0.09098		71.1518	0.05947		63.6956	0.07319		66.7012	0.08547		67.337	0.06965		71.2674	0.07809		68.2618	0.0836					71.7298	0.12034								69.4756	0.04057		76.296	0.06842		67.4526	0.07507		60.4588	0.05277
61.846	0.06499		77.8566	0.09013		65.7764	0.0667		64.3314	0.08133		65.314	0.0865		67.337	0.07311		63.6378	0.069		74.273	0.07071					77.9722	0.07715								73.4638	0.0851		64.3892	0.07893		80.1108	0.06133		61.846	0.05911
69.7646	0.06788		69.9958	0.06422		78.03	0.07982		66.759	0.07296		72.9436	0.07469		81.3246	0.08982		70.4582	0.066		71.383	0.06686					69.4178	0.05008								58.8982	0.04275		66.759	0.06757		69.7068	0.06894		68.1462	0.05395
63.291	0.07831		75.1978	0.0877		66.0654	0.06842		70.805	0.08336		73.5216	0.08289		66.3544	0.06365		73.0014	0.07076		68.0884	0.04183					75.1978	0.06582								67.337	0.07076		72.4234	0.0832		67.6838	0.06588		75.6602	0.08007
63.6378	0.05924		83.521	0.09968		75.8336	0.07161		71.0362	0.0781		69.8224	0.07603		72.3656	0.07838		61.6726	0.05645		80.631	0.08794					65.2562	0.05683								76.4694	0.05539		76.2382	0.06678		71.7876	0.07021		69.4756	0.06225
64.1002	0.05346		69.1866	0.09358		75.6024	0.06178		73.695	0.10708		69.8224	0.0958		72.8858	0.08161		79.2438	0.07318		69.0132	0.06375					74.0418	0.08631								71.2674	0.0585		64.7938	0.07139		58.667	0.07391		80.2842	0.0698
59.9386	0.06162		76.7584	0.10144		75.0244	0.07758		78.608	0.08065		67.5104	0.06344		64.9094	0.07836		68.6664	0.07505		70.3426	0.06586					71.6142	0.06411								74.9088	0.08113		72.1344	0.07786		64.9672	0.06138		64.736	0.06473
68.8398	0.07333		70.4004	0.08554		57.8	0.06314		71.1518	0.07827		77.8566	0.09009		64.7938	0.07854		72.5968	0.08698		68.8398	0.05427					67.6838	0.07155								68.9554	0.04911		63.869	0.09357		66.3544	0.06431		67.1636	0.07155
64.6782	0.07409		72.4812	0.07462		75.5446	0.08734		67.8572	0.07495		79.186	0.07991		79.3594	0.07924		72.0766	0.06911		67.1058	0.07393					70.0536	0.03677								64.9672	0.0306		67.7416	0.06911		72.7124	0.08217		69.4178	0.07407
65.6608	0.07566		79.3594	0.07594		77.9144	0.08693		60.979	0.06559		75.14	0.07884		73.6372	0.09406		77.1052	0.11594		67.5682	0.0635					62.0194	0.04862								63.5222	0.06016		61.7304	0.08234		65.4296	0.09008		65.7186	0.06172
61.9038	0.0527		70.9784	0.09668		77.5676	0.08361		69.8224	0.07259		79.0126	0.08755		73.6372	0.08388		71.3252	0.07048		69.4756	0.08428					72.1922	0.05751								70.5738	0.06747		71.383	0.0764		68.3774	0.06457		70.6894	0.05758
68.3196	0.07226		68.204	0.09587		79.5906	0.09029		69.8802	0.08093		84.099	0.09681		65.4296	0.0618		77.2786	0.08614		71.383	0.07252					82.1916	0.06797								75.5446	0.06709		64.2736	0.06804		65.3718	0.06923		74.7354	0.05344
79.764	0.08097		65.603	0.08765		61.3258	0.09026		61.3836	0.07892		71.094	0.06703		79.1282	0.06475		66.2966	0.07644		68.6664	0.07159					78.7236	0.06016								66.9902	0.02438		63.6956	0.06632		71.094	0.07747		66.5856	0.07692
63.0598	0.08168		77.452	0.1025		71.1518	0.07232		65.314	0.08777		79.764	0.08332		69.649	0.0743		68.204	0.07244		83.81	0.08632					67.048	0.05142								64.9094	0.05412		67.3948	0.07181		65.9498	0.05252		74.1574	0.07778
71.094	0.08095		76.9318	0.09443		66.5856	0.08		73.406	0.08035		67.6838	0.06957		65.4296	0.07542		58.3202	0.04774		63.9268	0.05608					73.1748	0.05819								66.0076	0.03446		67.1058	0.09852		69.4178	0.06924		73.117	0.05625
72.5968	0.0782		72.3656	0.0647		73.695	0.07492		73.984	0.09127		68.2618	0.08776		71.2674	0.09996		61.9616	0.05976		65.4874	0.08091					77.741	0.0705								65.4874	0.05551		58.8982	0.05255		68.2618	0.06319		75.718	0.04813
71.7298	0.07393		76.5272	0.10523		70.8628	0.06813		62.4818	0.06225		69.1866	0.06749		75.14	0.07715		73.9262	0.09016		71.2674	0.07102					69.8224	0.03436								62.2506	0.04889		62.9442	0.06611		67.915	0.04624		68.0306	0.06521
61.268	0.07428		73.9262	0.0868		66.0654	0.07401		59.0138	0.06052		77.7988	0.09129		63.869	0.09619		73.2904	0.08256		71.8454	0.07726					69.0132	0.08128								69.7068	0.04932		65.0828	0.08191		66.7012	0.09187		83.6366	0.07503
64.7938	0.07548		66.9324	0.06963		76.007	0.08746		74.7932	0.10233		77.3942	0.07712		73.117	0.06394		73.3482	0.07656		65.1984	0.04877					82.654	0.08807								71.094	0.06175		72.828	0.10027		67.2792	0.03971		79.2438	0.06921
68.0306	0.07766		66.4122	0.07231		72.1344	0.108		68.1462	0.09204		74.6198	0.08838		70.3426	0.11133		74.3886	0.07302		69.5334	0.06432					86.411	0.07489								67.1058	0.03048		64.5048	0.07055		64.9672	0.06643		65.0828	0.06868
64.3892	0.07391		70.7472	0.09105		72.7702	0.07887		75.4868	0.08874		68.1462	0.10108		68.9554	0.08388		73.5216	0.09934		76.296	0.05895					77.6832	0.04013								81.8448	0.07302		70.3426	0.07421		58.7248	0.06207		66.5278	0.0467
73.695	0.07697		64.736	0.07419		70.4582	0.06979		70.1114	0.09465		68.5508	0.08292		75.8914	0.07977		69.4178	0.06224		72.0766	0.06001					81.498	0.08898								72.1922	0.03697		61.6148	0.06966		67.1058	0.04746		67.1636	0.06253
66.2388	0.05681		73.4638	0.10589		82.7118	0.08306		68.7242	0.08565		70.8628	0.07263		74.851	0.07415		62.8286	0.07048		73.2904	0.06756					73.6372	0.05118								68.782	0.08253		62.3662	0.09333		70.805	0.04835		69.9958	0.0556
71.2096	0.06857		80.8622	0.09272		64.5048	0.08579		72.9436	0.08698		69.649	0.07424		76.2382	0.07159		66.0654	0.07502		66.9324	0.0561					71.4986	0.05225								66.181	0.05504		63.3488	0.06582		66.2966	0.07925		69.8224	0.04789
69.649	0.0729		68.493	0.08516		72.0188	0.07971		66.759	0.08828		62.6552	0.05415		67.1058	0.07573		75.6602	0.08042		78.5502	0.0693					70.9784	0.06793								60.8634	0.06904		69.2444	0.06437		60.401	0.06073		70.7472	0.07543
68.0884	0.07043		75.8336	0.09356		74.2152	0.0817		69.5334	0.08326		67.5104	0.05972		67.2792	0.07001		64.9094	0.0691		85.6596	0.08299					64.6204	0.05392								77.1052	0.04963		71.4986	0.08461		74.0996	0.06769		75.8914	0.07845
72.7702	0.07194		72.9436	0.08964		71.672	0.06875		61.9616	0.08418		76.8162	0.06512		66.7012	0.07221		65.0828	0.07758		64.3892	0.04479					72.539	0.04523								66.1232	0.04679		70.4004	0.08378		62.0772	0.07586		69.5334	0.06718
65.7764	0.06864		68.493	0.06869		70.1114	0.08803		70.4582	0.07642		67.8572	0.06554		72.539	0.08742		67.9728	0.07482		75.0244	0.0742					73.2904	0.05827								70.5738	0.06137		72.1922	0.0853		65.8342	0.06761		65.892	0.07911
67.6838	0.08597		72.0188	0.07269		68.204	0.06331		67.2214	0.06399		65.892	0.0712		75.7758	0.08326		70.0536	0.09586		74.5042	0.07679					68.6664	0.05626								73.6372	0.08401		61.846	0.07233		65.5452	0.07128		79.1282	0.10438
74.851	0.08243		73.3482	0.10112		79.8796	0.07338		66.759	0.0875		70.516	0.075		72.4812	0.09637		73.5794	0.0711		67.337	0.07356					63.4644	0.07881								62.0194	0.04324		63.4644	0.07006		64.3892	0.04557		61.2102	0.07359
75.6024	0.08011		74.9666	0.08062		73.8684	0.06701		66.7012	0.08575		77.6254	0.08614		70.7472	0.07812		65.7186	0.06302		74.4464	0.08412					66.1232	0.03757								67.3948	0.06073		68.0884	0.08367		72.5968	0.07072		71.5564	0.04169
62.424	0.05713		64.6204	0.08621		78.2612	0.09507		60.5166	0.07486		67.337	0.08139		56.4128	0.07434		61.0946	0.06405		63.9846	0.05857					74.5042	0.05455								71.2096	0.05464		64.6782	0.06071		60.8056	0.05525		73.2904	0.03814
71.2096	0.08459		82.4806	0.09097		66.8746	0.0669		76.0648	0.09947		69.4756	0.07017		70.6894	0.06963		78.8392	0.07559		77.8566	0.06997					63.9846	0.07528								68.3774	0.03282		62.2506	0.0497		78.3768	0.07378		57.3954	0.03968
63.9268	0.08191		67.2214	0.06948		55.6614	0.05421		65.025	0.07766		75.0244	0.08303		62.5396	0.05724		77.7988	0.07511		67.915	0.06463					73.8106	0.05834								64.2158	0.05149		73.0592	0.07729		65.1984	0.07102		70.1114	0.04673
70.0536	0.05955		69.7646	0.09081		69.071	0.08148		75.429	0.08811		77.2786	0.07716		72.3078	0.08729		68.0884	0.08091		76.874	0.09683					69.649	0.05531								64.7938	0.05391		69.9958	0.09286		68.782	0.06846		61.9616	0.05196
70.0536	0.06933		82.7118	0.098		72.1922	0.07671		78.4346	0.09126		60.401	0.08383		73.3482	0.07712		62.8286	0.06956		69.1288	0.07026					64.3892	0.04629								83.0586	0.10137		67.5682	0.0727		66.759	0.07234		65.603	0.07645
62.135	0.0752		73.5794	0.07505		76.6428	0.09065		67.1058	0.07312		70.7472	0.09015		65.1406	0.06647		69.649	0.08106		67.7994	0.0672					77.0474	0.05821								71.672	0.06587		59.8808	0.06465		62.5974	0.06855		70.9206	0.05644
63.4644	0.07471		77.5676	0.09676		63.0598	0.06532		63.5222	0.08128		73.3482	0.07333		66.7012	0.0685		70.3426	0.09192		73.5794	0.07598					83.0008	0.08165								66.6434	0.07287		63.6378	0.06457		82.1338	0.08054		70.4582	0.0469
67.626	0.05775		75.4868	0.07521		66.9902	0.0788		63.2332	0.08849		64.7938	0.06067		67.3948	0.07247		61.3258	0.06923		68.6664	0.0594					67.2792	0.03613								66.47	0.0501		68.0306	0.07531		64.736	0.04651		78.4924	0.07064
66.6434	0.06329		71.9032	0.08342		72.5968	0.0831		71.5564	0.08131		73.0014	0.07634		69.36	0.07245		73.8106	0.07297		63.869	0.06117					73.2904	0.12186								69.1866	0.04863		71.094	0.08648		64.736	0.06117		67.7994	0.04455
65.7186	0.07291		76.9896	0.08665		73.8106	0.06788		67.7994	0.08215		78.5502	0.06166		72.4234	0.07653		78.0878	0.07723		71.8454	0.06311					75.0244	0.07883								84.5614	0.13073		72.0766	0.06627		63.1754	0.0622		71.961	0.06072
77.9722	0.08178		66.5856	0.07839		76.7584	0.07733		69.7646	0.0824		68.5508	0.09005		73.9262	0.09468		63.5222	0.0855		67.6838	0.06767					71.6142	0.0579								75.2556	0.03067		66.2966	0.09073		73.117	0.06788		67.626	0.05381
66.2388	0.08205		71.9032	0.07404		71.5564	0.08218		67.4526	0.07226		65.2562	0.06346		65.8342	0.09264		64.9094	0.07287		67.2214	0.06326					76.7006	0.05013								63.002	0.04074		65.4296	0.0737		67.6838	0.06357		73.5216	0.07539
66.3544	0.07891		70.2848	0.08638		73.117	0.07847		70.0536	0.0841		65.4296	0.06852		67.7416	0.07759		60.979	0.07589		71.7876	0.06617					74.3308	0.0863								57.222	0.04174		61.3836	0.06095		77.9144	0.06708		69.3022	0.06552
66.0654	0.06591		61.846	0.07217		71.5564	0.07832		71.7876	0.07894		79.3016	0.09194		70.9206	0.07336		66.2388	0.07965		69.3022	0.08066					78.1456	0.04705								68.782	0.04537		64.3314	0.07374		66.759	0.07974		63.7534	0.04788
68.4352	0.07158		71.2674	0.07396		66.7012	0.06503		73.984	0.07157		67.6838	0.09158		73.2326	0.07959		67.5682	0.07791		70.6316	0.07366					59.4762	0.05619								63.1754	0.05103		61.9038	0.06112		66.0076	0.05848		70.805	0.08132
72.3078	0.08393		80.2842	0.08265		78.6658	0.07523		68.8398	0.08068		79.5328	0.08097		67.6838	0.08346		67.6838	0.08435		62.8864	0.05064					62.424	0.08611								59.534	0.04622		61.9616	0.06137		63.869	0.07301		71.4408	0.04864
70.1114	0.06526		71.7298	0.08018		77.452	0.08869		67.5682	0.06916		73.117	0.08398		61.4414	0.08337		64.8516	0.06923		66.2966	0.05485					72.8858	0.06031								86.2954	0.13522		61.846	0.06469		85.8908	0.06357		66.7012	0.06259
68.8976	0.06598		79.8796	0.09353		77.0474	0.06722		66.9902	0.07609		79.764	0.08733		60.9212	0.05786		73.0592	0.06961		79.7062	0.07252					78.7236	0.07163								56.7596	0.05032		70.0536	0.08884		72.5968	0.07525		66.8168	0.05405
71.9032	0.07766		75.7758	0.09315		78.897	0.07863		72.25	0.08304		75.0244	0.08126		75.6602	0.0975		74.562	0.07637		74.5042	0.07271					70.7472	0.04568								59.7074	0.02838		59.5918	0.05655		81.787	0.0843		71.2674	0.06383
66.4122	0.06913		76.9896	0.10735		67.1058	0.07909		76.6428	0.08728		76.5272	0.07649		67.626	0.08268		69.1288	0.07875		74.1574	0.05514					69.649	0.06749								68.7242	0.04513		67.7994	0.07995		72.4234	0.05949		71.672	0.06172
67.7416	0.07191		76.3538	0.09081		66.9324	0.06224		70.5738	0.06493		76.8162	0.08526		67.5682	0.06855		72.8858	0.07623		71.7298	0.07054					81.498	0.10559								75.0244	0.07526		66.47	0.06021		67.2214	0.06699		76.3538	0.06044
73.695	0.0794		70.6316	0.0942		74.3886	0.07093		71.8454	0.07092		61.4414	0.07118		63.4066	0.08256		73.1748	0.06677		75.7758	0.07082					73.0014	0.08468								61.3836	0.0394		65.603	0.07867		68.6664	0.08206		76.296	0.07177
75.3712	0.07682		76.296	0.09314		69.5334	0.06591		69.5912	0.1029		76.1804	0.07424		73.1748	0.07801		65.7764	0.07725		67.915	0.04929					76.296	0.02511								69.8802	0.03301		65.7186	0.07984		67.915	0.06415		72.3656	0.04237
62.6552	0.07263		74.6198	0.08175		66.4122	0.06862		65.892	0.068		77.9722	0.09033		63.4066	0.07791		66.5278	0.06076		74.7932	0.06691					74.6776	0.08761								57.2798	0.05401		72.7124	0.06103		63.58	0.05545		73.3482	0.08826
65.5452	0.07885		80.4576	0.08843		68.4352	0.05591		72.7124	0.07517		79.0126	0.09148		63.7534	0.07538		63.7534	0.0772		68.9554	0.07899					68.2618	0.05791								74.9666	0.07616		67.626	0.0658		66.9902	0.05589		72.3078	0.07538
67.337	0.06312		73.1748	0.07299		69.1866	0.06404		67.7994	0.06883		79.3016	0.08361		62.3084	0.0803		73.695	0.08094		68.5508	0.07019					58.2046	0.05311								70.9206	0.04907		67.7416	0.0819		71.672	0.06657		63.002	0.07036
55.5458	0.04099		78.2612	0.09509		69.0132	0.07416		68.6086	0.0954		77.9144	0.09467		68.3774	0.05793		73.7528	0.08014		85.4284	0.09115					75.14	0.04112								70.227	0.07327		68.4352	0.07861		69.0132	0.07064		69.0132	0.05884
69.071	0.0798		68.5508	0.07772		70.9206	0.07306		66.5278	0.08193		68.0884	0.10167		60.3432	0.06154		71.961	0.08215		73.5216	0.06381					86.3532	0.11124								63.1176	0.04439		68.0306	0.08083		77.2208	0.05277		72.8858	0.06072
66.7012	0.07553		79.475	0.09355		71.672	0.07423		64.6204	0.07969		65.3718	0.07724		69.1866	0.0766		70.0536	0.06916		74.6198	0.06907					66.2388	0.05119								66.9324	0.06384		56.7018	0.07152		71.3252	0.07139		73.1748	0.08194
60.2854	0.05224		66.5856	0.09363		75.8914	0.08179		76.8162	0.09094		66.4122	0.07475		69.071	0.07799		66.4122	0.07976		73.4638	0.07442					73.0014	0.09206								74.0418	0.07991		71.9032	0.094		70.227	0.07555		70.7472	0.07412
73.695	0.06593		66.0076	0.08445		78.2612	0.06252		67.9728	0.07543		77.3942	0.08537		69.7068	0.08597		69.7646	0.07068		70.5738	0.06331					66.181	0.0611								67.626	0.02968		64.158	0.05655		65.314	0.04913		65.603	0.04775
64.736	0.06798		73.0592	0.07081		69.938	0.0794		64.2736	0.07558		70.5738	0.08691		68.0306	0.07469		77.3364	0.08508		74.0996	0.07254					66.9902	0.08781								76.9896	0.07371		65.8342	0.07641		65.025	0.07071		63.0598	0.0342
64.2158	0.06645		70.5738	0.10199		68.0884	0.07809		70.9784	0.09404		76.7006	0.08548		64.158	0.0674		69.5334	0.07087		67.1636	0.06241					69.8224	0.06286								76.9896	0.08241		67.9728	0.07012		66.7012	0.0577		75.7758	0.0726
64.8516	0.07178		75.0822	0.08231		73.3482	0.07937		69.7068	0.08634		84.9082	0.10069		68.782	0.07656		72.9436	0.07147		65.9498	0.05109					59.4762	0.08234								64.1002	0.06037		61.4992	0.07072		85.6018	0.06935		73.8106	0.06545
69.0132	0.06948		72.3656	0.08812		75.14	0.08672		64.8516	0.07967		68.8976	0.07582		69.0132	0.07549		68.8976	0.06003		69.5912	0.06988					61.7304	0.03778								68.4352	0.04961		62.3084	0.07249		72.3078	0.06426		62.9442	0.07214
59.9386	0.06087		81.3824	0.10233		71.2674	0.08575		60.9212	0.07809		68.5508	0.08289		68.8976	0.07756		67.915	0.07815		81.2668	0.08641					67.7994	0.03081								63.6378	0.06443		66.5278	0.08263		71.383	0.07212		72.3078	0.07004
72.3078	0.0609		67.3948	0.09267		73.117	0.08214		63.4066	0.07447		74.3308	0.08006		70.5738	0.07654		72.3656	0.08034		63.5222	0.06416														69.9958	0.05939		60.8634	0.06738		67.915	0.05093		77.5676	0.06387
73.0014	0.08162		73.984	0.08166		71.2096	0.07575		73.0014	0.07901		74.1574	0.08042		66.0076	0.05423		72.3078	0.06945		74.4464	0.06117														70.4582	0.10345		72.25	0.06991		70.0536	0.0746		68.0306	0.03848
74.7354	0.08603		72.25	0.07757		68.9554	0.0615		67.1058	0.09048		76.007	0.08227		73.3482	0.07554		66.5856	0.06992		69.649	0.08442														69.0132	0.10311		60.1698	0.05919		69.649	0.0581		66.2388	0.06478
66.6434	0.07909		73.2904	0.09116		69.7068	0.0721		62.9442	0.07213		74.9088	0.0689		70.9784	0.07565		76.8162	0.07047		79.3016	0.07623														66.181	0.0329		74.0996	0.0666		75.14	0.06857		64.5048	0.06165
71.3252	0.08622		77.6832	0.0921		79.3594	0.07489		61.9038	0.06806		70.1114	0.08387		68.8398	0.06788		65.8342	0.07811		68.4352	0.05591														62.5396	0.06429		77.5098	0.08602		68.9554	0.0704		68.4352	0.03623
78.7236	0.05541		76.9896	0.0809		70.227	0.06633		75.8336	0.08632		76.585	0.09002		72.6546	0.09728		69.7068	0.07721		74.2152	0.0817														73.406	0.08715		70.9784	0.07374		76.007	0.05774		76.296	0.07772
61.0368	0.07265		72.0188	0.07521		72.0766	0.0818		74.562	0.08957		78.4346	0.08459		70.9206	0.08798		77.741	0.07929		77.5098	0.05962														65.8342	0.06914		65.1406	0.08724		61.0368	0.0524		68.0884	0.07157
67.8572	0.085		65.1406	0.0936		69.3022	0.06957		64.1002	0.07782		74.7932	0.07713		72.5968	0.0833		80.4576	0.07465		75.14	0.05704														71.6142	0.08111		59.0716	0.0731		65.025	0.06333		76.6428	0.0804
67.7994	0.07243		77.163	0.10047		81.9026	0.07703		63.5222	0.09081		64.2736	0.07076		65.4874	0.0681		68.6086	0.07316		78.4924	0.07731														72.828	0.06901		63.4066	0.07244		62.135	0.07495		73.984	0.08664
66.8168	0.09005		78.4924	0.08463		78.03	0.0924		64.9094	0.09134		72.4234	0.08549		62.7708	0.06166		60.69	0.07162		68.3196	0.05075														66.8168	0.07238		70.8628	0.06628		72.6546	0.07298		64.736	0.05985
75.1978	0.08399		72.828	0.09471		74.4464	0.08354		62.5974	0.07615		72.539	0.09161		62.135	0.07157		61.7304	0.07833		66.7012	0.07408														80.5732	0.11916		66.6434	0.06394		69.36	0.05949		72.0766	0.06424
71.0362	0.07334		70.227	0.09156		69.8224	0.0612		75.0244	0.08615		66.9902	0.08681		66.2388	0.07418		64.158	0.08015		67.1058	0.06083														70.1692	0.05637		61.6148	0.0493		68.3196	0.06086		68.1462	0.06402
71.9032	0.07826		80.5154	0.08561		68.3774	0.07005		73.2326	0.08317		74.7354	0.07974		61.6726	0.0705		73.8106	0.07554		68.0306	0.05701														64.8516	0.06024		63.9268	0.06933		63.9846	0.067		74.3308	0.07584
65.314	0.07324		66.3544	0.094		78.5502	0.07367		75.8336	0.08953		81.0356	0.08017		67.1058	0.06204		69.4756	0.09821		70.3426	0.05762														62.6552	0.03638		72.7124	0.07471		76.3538	0.08767		72.1922	0.04687
67.915	0.05424		70.4582	0.09091		66.0654	0.0772		68.8398	0.09974		67.048	0.07699		65.025	0.07059		77.2786	0.0792		66.6434	0.06589														63.002	0.04389		74.0418	0.08555		75.14	0.0756		73.5794	0.07658
65.7764	0.0706		68.3196	0.07236		68.6086	0.07705		69.4756	0.09139		70.5738	0.07661		72.1922	0.076		76.4116	0.07307		73.5794	0.06685														73.2326	0.06054		66.181	0.06833		72.539	0.06628		70.1692	0.09804
69.1288	0.06581		72.5968	0.09421		72.0766	0.07828		74.851	0.08985		70.0536	0.07308		67.048	0.06255		63.291	0.08068		67.9728	0.07012														65.892	0.06541		63.6378	0.08491		66.9902	0.09098		80.631	0.06751
65.1406	0.05882		72.0188	0.09508		66.2388	0.07711		76.296	0.09569		72.3656	0.0808		75.3134	0.09876		70.1692	0.08344		62.8286	0.06789														72.3078	0.06658		60.2854	0.05804		73.0014	0.0599		70.6316	0.06882
74.4464	0.0829		74.9088	0.07971		63.6956	0.04596		61.6726	0.06556		70.516	0.06513		79.6484	0.07814		71.0362	0.07249		69.3022	0.08854														60.8634	0.06811		59.4184	0.07229		74.562	0.05852		75.718	0.06488
81.6714	0.07707		80.2842	0.09532		80.2842	0.07479		72.3656	0.08071		72.9436	0.07357		72.8858	0.07518		62.7708	0.07037		78.7236	0.07018														72.7702	0.07016		71.8454	0.067		72.8858	0.04779		75.6024	0.0699
68.782	0.07832		69.7646	0.08587		72.828	0.07658		72.8858	0.07918		71.9032	0.07798		65.1984	0.0709		65.7764	0.06699		70.516	0.06575														69.649	0.04643		64.0424	0.08176		61.6148	0.06674		69.7646	0.06882
72.0188	0.08039		74.0418	0.09129		65.1984	0.06368		62.3084	0.07676		79.0126	0.08661		66.5856	0.07636		57.6844	0.05753		71.961	0.067														63.3488	0.05998		62.9442	0.10372		63.4644	0.06072		76.3538	0.08123
65.8342	0.06753		76.296	0.08999		71.672	0.07816		76.7584	0.09183		78.03	0.10898		74.7932	0.07441		68.7242	0.05702		78.897	0.0695														71.383	0.04224		65.314	0.07139		70.1692	0.0704		75.14	0.05877
64.5626	0.08405		68.0884	0.06938		68.8398	0.07648		73.2904	0.07696		69.071	0.06643		71.2096	0.09607		64.2736	0.06684		78.03	0.06384														65.0828	0.05622		72.1344	0.08207		68.6664	0.08721		85.8908	0.069
61.3836	0.07199		68.6086	0.07411		75.429	0.09011		62.2506	0.08795		70.516	0.08113		69.649	0.08773		75.4868	0.08337		76.874	0.07343														55.8926	0.06132		62.1928	0.06357		72.6546	0.06919		62.4818	0.04947
67.915	0.05529		70.805	0.09082		69.5912	0.08194		73.7528	0.1002		76.8162	0.09216		62.0194	0.07456		63.58	0.0655		76.6428	0.08088														75.3134	0.0316		65.6608	0.06943		60.1698	0.07037		74.0996	0.06552
75.14	0.07107		66.8168	0.09015		68.1462	0.07844		80.053	0.09311		67.2214	0.06589		66.7012	0.07591		78.4924	0.08903		78.4924	0.07927														68.9554	0.06758		67.7416	0.08477		68.3774	0.06365		60.979	0.06174
65.892	0.08197		69.8802	0.08224		68.2618	0.07265		63.6378	0.06604		67.1058	0.07776		71.961	0.08065		71.094	0.09016		74.0996	0.08113														74.851	0.07867		70.3426	0.07634		71.2096	0.08728		67.048	0.05525
57.6266	0.08521		72.4812	0.08552		62.5974	0.06809		64.9094	0.09186		67.5682	0.08568		67.337	0.08351		61.3258	0.04433		70.805	0.06137														63.291	0.06777		72.1922	0.09837		64.1002	0.04551		66.8168	0.05185
72.1344	0.08002		76.0648	0.0948		73.1748	0.07526		66.7012	0.08237		77.2208	0.08243		72.828	0.07826		69.5912	0.07563		74.3308	0.07474														69.938	0.06089		59.4762	0.06697		71.3252	0.08286		69.8224	0.06035
62.2506	0.0685		76.5272	0.09532		77.1052	0.08436		64.3314	0.06922		61.557	0.07753		66.2966	0.07002		72.25	0.09753		71.2096	0.05972														67.1058	0.04437		66.6434	0.09174		70.9206	0.07866		66.0076	0.05675
63.002	0.07486		71.1518	0.09723		67.626	0.06731		81.4402	0.09609		70.3426	0.06641		63.4644	0.07877		72.25	0.07398		66.47	0.06999														73.2904	0.03791		60.8056	0.06505		75.8914	0.05606		76.5272	0.06798
67.337	0.07497		72.539	0.09581		75.1978	0.08504		67.1636	0.06883		82.654	0.07454		71.8454	0.07941		67.4526	0.06912		72.3078	0.05231														80.1686	0.06792		63.4066	0.06426		67.3948	0.05908		69.5334	0.07802
68.204	0.06685		66.181	0.08541		69.4178	0.06401		69.5912	0.08491		80.1108	0.09683		75.0244	0.1		63.1754	0.05429		72.3656	0.08307														65.9498	0.05036		65.8342	0.09199		74.0996	0.06887		69.938	0.06862
79.8218	0.08556		71.4986	0.08022		71.2096	0.07789		63.3488	0.09139		76.9318	0.08637		69.8224	0.08668		65.025	0.07129		63.5222	0.07085														71.7298	0.07485		66.2388	0.06672		68.0306	0.07353		78.7814	0.05552
68.6664	0.05734		76.5272	0.10539		73.9262	0.08658		66.7012	0.06174		71.4408	0.07931		62.0194	0.06475		59.6496	0.05477		68.9554	0.08147														70.516	0.05549		72.0766	0.08959		77.1052	0.07028		74.3886	0.07943
78.03	0.09716		67.915	0.08		63.1176	0.08851		60.112	0.07202		77.3942	0.07592		67.626	0.07031		79.5328	0.08187		69.071	0.04877														64.3314	0.05086		68.0884	0.06546		65.4874	0.06857		86.7	0.075
68.4352	0.06222		76.9318	0.08672		73.6372	0.08302		78.319	0.09399		69.8224	0.07885		64.5048	0.07216		72.1922	0.0854		70.0536	0.06401														73.3482	0.06405		65.603	0.03989		63.4066	0.05589		73.3482	0.06607
75.7758	0.07761		79.6484	0.08833		68.782	0.06349		67.626	0.06911		78.0878	0.0795		74.273	0.08975		68.3196	0.07568		73.695	0.05372														80.342	0.09697		71.4986	0.07416		68.8398	0.07706		71.2096	0.06921
63.2332	0.05673		82.8274	0.09472		72.0766	0.06397		63.1754	0.06678		77.8566	0.08444		63.7534	0.09399		74.7932	0.09353		59.245	0.05754														69.5912	0.08814		73.8684	0.06815		71.5564	0.06935		68.5508	0.083
61.9038	0.08202		65.025	0.06642		80.342	0.0889		63.4644	0.07514		73.2326	0.08775		68.4352	0.07684		67.6838	0.08719		67.9728	0.06606														69.5912	0.07386		63.5222	0.05812		70.0536	0.07086		72.3656	0.06023
69.1288	0.07596		72.3078	0.08068		67.9728	0.0723		73.406	0.08017		66.181	0.07602		78.1456	0.08447		69.4178	0.0654		73.0014	0.07851														66.2388	0.04741		67.8572	0.08756		67.7416	0.07908		67.915	0.07563
71.0362	0.07162		74.2152	0.08496		70.6316	0.08281		71.9032	0.07384		62.5974	0.07411		70.9206	0.07235		71.2096	0.09616		86.8156	0.08721														78.7236	0.05397		66.5278	0.08813		62.0194	0.0648		66.5278	0.06336
72.1344	0.07929		77.1052	0.08003		69.1288	0.07804		66.2966	0.0951		78.0878	0.09233		67.1058	0.08375		74.562	0.08377		65.025	0.06653														74.3308	0.07687		76.9318	0.09037		72.25	0.0514		65.3718	0.08277
68.204	0.07104		72.828	0.0839		83.521	0.07504		67.8572	0.08517		78.6658	0.08397		65.025	0.07992		64.0424	0.07563		65.5452	0.06619														74.0418	0.06962		65.5452	0.06945		64.0424	0.05888		64.158	0.05046
66.759	0.05656		78.608	0.0957		71.9032	0.06812		65.7186	0.07439		70.1114	0.09941		70.227	0.07685		60.9212	0.06065		67.7994	0.07036														63.1754	0.03897		71.6142	0.09911		65.8342	0.0668		66.7012	0.06737
69.3022	0.07959		65.8342	0.06776		77.3942	0.08478		68.2618	0.06403		72.1344	0.07291		67.337	0.06562		64.0424	0.07438		68.6664	0.05755														76.007	0.06912		61.6726	0.06171		75.4868	0.07841		69.1288	0.06412
67.1636	0.07965		70.227	0.08629		77.0474	0.08433		75.6024	0.09699		68.8976	0.09724		72.4812	0.06624		68.4352	0.08566		72.3078	0.06451														61.0368	0.05206		67.337	0.07584		75.429	0.08082		72.8858	0.03582
61.1524	0.06664		79.3594	0.07051		75.0244	0.06256		66.9324	0.08456		68.5508	0.0783		64.9094	0.08919		74.9088	0.08252		71.4408	0.0571														72.25	0.06276		68.0306	0.08288		72.7702	0.07962		68.493	0.05853
74.7354	0.05872		70.3426	0.09061		66.3544	0.06479		71.9032	0.09699		69.1866	0.05981		68.6664	0.05901		69.36	0.06369		80.1686	0.07926														64.3892	0.06468		59.7074	0.04215		66.2966	0.07948		79.3594	0.09895
67.7416	0.0537		68.5508	0.07372		62.0772	0.05984		67.7416	0.07709		70.1692	0.09767		76.9318	0.0652		77.452	0.07529		74.4464	0.07217														65.4296	0.0704					65.1406	0.05176		74.7354	0.09153
68.2618	0.07838		79.8796	0.08278		73.5794	0.06618		63.869	0.08112		75.9492	0.07181		67.8572	0.07485		65.5452	0.06352		71.2096	0.06794														79.186	0.08785					66.181	0.05878		71.2674	0.0961
76.4116	0.07036		69.3022	0.07476		74.1574	0.08461		65.025	0.07816		75.429	0.08259		64.3892	0.07776		69.2444	0.06114		66.2388	0.05249														73.0014	0.05529					68.782	0.08683		73.117	0.06362
67.1636	0.07874		70.7472	0.09743		68.9554	0.05352		75.3712	0.07037		79.8218	0.10213		69.1866	0.06434		75.1978	0.09302		76.585	0.07467														62.135	0.07694					67.9728	0.06482		75.3134	0.07747
65.1406	0.07591		67.7416	0.07811		69.071	0.06973		62.7708	0.07696		72.539	0.07851		66.9324	0.0919		82.654	0.08164		66.1232	0.06755														66.4122	0.04249					63.6956	0.05751		67.7994	0.05656
63.0598	0.05108		73.4638	0.07828		66.6434	0.0644		66.8168	0.08687		70.227	0.08712		73.0014	0.0952		76.9896	0.10048		74.9088	0.06727														68.7242	0.05322					72.9436	0.05489		76.585	0.04051
63.291	0.09612		75.3712	0.07982		68.6086	0.07349		68.1462	0.08181		69.1288	0.08859		73.2904	0.06905		61.9038	0.07235		70.6894	0.06784														68.2618	0.04407					76.4694	0.06803		68.8398	0.06727
64.447	0.07065		71.8454	0.08151		73.0014	0.06152		62.5974	0.07911		70.805	0.08684		63.5222	0.0388		63.1754	0.07817		80.7466	0.07426														70.2848	0.05897					71.6142	0.09746		71.7876	0.06549
76.6428	0.0811		76.8162	0.08326		80.9778	0.0819		66.0654	0.06793		74.2152	0.08691		75.0822	0.07544		73.3482	0.07315		73.4638	0.10189														70.805	0.03327					71.961	0.05918		69.071	0.06143
67.626	0.08101		74.273	0.10159		79.7062	0.08229		78.4346	0.09085		70.0536	0.0615		63.8112	0.0657		64.447	0.06439		76.874	0.06372														68.5508	0.07084					61.0946	0.05515		78.6658	0.07054
66.5278	0.07272		67.337	0.07812		67.7416	0.06529		66.4122	0.07879		73.8684	0.09438		72.0188	0.07995		78.4346	0.08708		63.58	0.0556														67.337	0.0661					74.1574	0.05951		67.6838	0.06001
76.585	0.0791		74.2152	0.08592		77.6832	0.0718		67.626	0.07538		70.1114	0.08166		71.1518	0.07857		66.0654	0.06577		75.2556	0.08074														71.0362	0.07529					68.6086	0.06815		70.4004	0.06819
70.5738	0.07277		80.4576	0.09162		79.186	0.08067		68.4352	0.08561		65.4874	0.0778		76.5272	0.08773		73.8684	0.0831		76.4116	0.07333														64.6782	0.07026					81.9026	0.07502		78.3768	0.079
68.8976	0.08482		73.695	0.09171		69.938	0.09217		64.0424	0.0779		67.1058	0.08527		77.163	0.07158		67.2214	0.08396		67.4526	0.06464														71.2674	0.05568					73.9262	0.06755		68.7242	0.05688
67.7416	0.07778		74.9666	0.08058		71.7298	0.0812		62.713	0.07297		76.5272	0.08132		67.2792	0.07236		61.9038	0.07745		65.9498	0.06231														68.3196	0.05247					66.181	0.05954		62.424	0.06074
65.4874	0.06623		71.6142	0.09958		64.158	0.05278		62.5974	0.08266		69.1288	0.0813		65.8342	0.07477		72.1922	0.08067		73.695	0.07165														82.5384	0.12743					63.4644	0.07775		68.2618	0.04608
70.5738	0.08538		71.0362	0.09169		66.5278	0.07062		79.1282	0.09156		58.6092	0.07247		59.4762	0.08149		64.9672	0.08332		70.5738	0.08397														74.7354	0.0485					63.0598	0.0646		69.7646	0.05904
67.1058	0.06152		66.8746	0.09793		64.0424	0.06403		67.7416	0.07593		71.2096	0.06754		76.6428	0.08159		70.1692	0.11105		74.0418	0.08438														74.0996	0.06376					67.5104	0.07989		71.9032	0.09874
69.649	0.07521		73.0592	0.08184		76.7006	0.08473		73.5216	0.08634		75.9492	0.09981		69.9958	0.08013		64.2158	0.07918		66.47	0.06919														72.7702	0.05323					72.3078	0.06323		75.2556	0.07298
69.2444	0.06806		71.4986	0.08359		72.1344	0.09892		70.9784	0.06864		78.03	0.07607		64.736	0.07937		75.9492	0.07005		63.869	0.06448														66.9902	0.05232					72.1922	0.07292		71.7298	0.05569
75.6024	0.06994		73.8106	0.09087		70.8628	0.07177		66.5278	0.10456		77.2208	0.07957		69.071	0.07593		60.4588	0.07221		62.3084	0.06942														69.2444	0.0768					74.3308	0.06674		69.649	0.06422
65.8342	0.06981		66.9902	0.07824		68.9554	0.07098		66.8746	0.07431		77.6254	0.08565		67.2214	0.07638		74.5042	0.0919		71.9032	0.07699														75.1978	0.06717					59.823	0.05685		73.1748	0.07696
78.897	0.08417		68.204	0.08013		75.6602	0.08358		67.1058	0.09948		66.2966	0.07141		76.874	0.08243		69.649	0.08459		64.9672	0.05555														63.291	0.07246					64.9672	0.0641		69.36	0.06047
75.14	0.068		73.406	0.08341		61.1524	0.07515		71.4986	0.08045		72.7702	0.07504		65.314	0.08856		67.4526	0.07568		78.7814	0.06333														79.6484	0.07373					74.851	0.05252		78.7236	0.07824
68.1462	0.07217		76.007	0.10838		71.9032	0.07146		71.0362	0.07696		78.2612	0.07298		60.979	0.0769		69.36	0.08262		74.0418	0.06108														64.9094	0.08646					69.1866	0.06047		69.0132	0.0628
66.759	0.0657		66.47	0.08716		72.4812	0.06578		64.8516	0.07864		65.0828	0.07543		74.3308	0.07348		63.291	0.08682		76.5272	0.05791														61.0946	0.02425					71.4986	0.05688		72.9436	0.06285
78.0878	0.08292		70.516	0.08398		60.8634	0.06599		64.9094	0.07694		66.2388	0.07052		71.1518	0.08055		79.764	0.0966		79.4172	0.07082														80.2842	0.0885					61.0946	0.06196		72.0188	0.0807
65.025	0.09171		76.4694	0.08364		71.0362	0.07604		61.4992	0.08361		70.9784	0.09575		73.984	0.07254		73.406	0.07609		79.7062	0.07261														60.112	0.06881					68.7242	0.06952		72.4234	0.07472
70.3426	0.06615		82.1916	0.11581		74.3886	0.08155		72.1922	0.09498		64.736	0.06452		71.9032	0.08086		66.2966	0.05359		83.5788	0.07594														62.713	0.07013					70.6894	0.06107		69.5912	0.06415
63.58	0.06508		79.2438	0.08919		69.36	0.07424		67.7994	0.07008		69.4178	0.06622		63.0598	0.07294		64.2158	0.06154		66.8168	0.06885														75.0822	0.09718					74.6776	0.07784		75.6024	0.07662
72.0188	0.06224		77.3364	0.08904		79.2438	0.07414		71.9032	0.10067		62.713	0.07107		76.3538	0.0854		72.6546	0.09353		73.2326	0.06556														77.6832	0.09277					64.5048	0.06126		66.0654	0.05589
73.8106	0.08649		71.7876	0.08687		78.2034	0.07853		67.3948	0.07465		72.9436	0.07653		61.3836	0.07421		69.938	0.07886		73.0014	0.07266														74.1574	0.14322					61.7304	0.05582		72.4812	0.05803
73.695	0.08037		64.736	0.07754		71.1518	0.0663		61.0946	0.07942		71.6142	0.08469		70.4582	0.08452		62.2506	0.07555		74.7354	0.07292														69.3022	0.04005					76.4116	0.05946		68.7242	0.05517
75.718	0.07732		72.1922	0.0776		71.6142	0.07549		69.7068	0.07201		82.0182	0.08928		70.0536	0.06577		76.5272	0.09014		66.0076	0.0692														71.2096	0.06136					74.6776	0.05586		64.5048	0.02905
73.5216	0.07101		72.539	0.08683		60.0542	0.07683		62.4818	0.07973		76.2382	0.09235		70.8628	0.08107		69.7646	0.0756		79.186	0.06588														63.3488	0.0461					71.3252	0.06913		73.117	0.06381
64.8516	0.05593		64.3314	0.07711		84.2146	0.0801		66.0654	0.07873		59.1872	0.0691		72.4812	0.09778		61.4992	0.06849		71.4408	0.07022														68.204	0.04581					73.1748	0.05499		70.3426	0.06608
68.0306	0.08302		66.8168	0.07619		71.0362	0.0777		64.6204	0.0761		69.36	0.07983		63.3488	0.09493		65.7186	0.07281		72.4812	0.0671														68.1462	0.04381					67.5104	0.07749		63.6378	0.07433
77.2786	0.07453		68.8976	0.07526		69.36	0.09036		66.47	0.07235		66.1232	0.07545		72.5968	0.0957		61.3258	0.0698		72.5968	0.07476														76.874	0.07279					67.5104	0.06504		72.828	0.07108
73.8684	0.07089		68.4352	0.08865		68.9554	0.07229		60.5166	0.07506		69.7068	0.06928		70.6894	0.08441		64.9094	0.09271		65.4296	0.07043														72.1922	0.08146					75.9492	0.06741		63.869	0.05898
66.0076	0.07861		70.0536	0.07656		70.227	0.05761		75.7758	0.09854		74.7354	0.06816		72.539	0.08472		61.4992	0.05841		64.2736	0.0625														73.6372	0.04399					79.9952	0.09725		73.5216	0.06505
65.4296	0.0733		76.296	0.09268		65.4296	0.06609		65.1406	0.08875		75.0822	0.09666		70.4004	0.07504		62.713	0.06676		62.7708	0.05824														67.7994	0.07834					63.4644	0.05562		61.0946	0.05936
81.0934	0.07864		78.03	0.09394		68.5508	0.05866		73.984	0.0998		67.9728	0.08177		71.9032	0.08837		74.562	0.08423		71.961	0.07152														62.5974	0.04029					66.3544	0.05483		72.0766	0.05433
63.5222	0.06827		72.1922	0.07708		72.5968	0.07067		64.447	0.06712		68.204	0.09185		67.626	0.11033		59.0138	0.06415		74.1574	0.05336														65.3718	0.05253					72.7124	0.07477		69.071	0.07977
65.9498	0.0724		84.099	0.09895		74.9088	0.07826		72.1922	0.07927		71.383	0.07375		70.1692	0.08405		75.429	0.07154		74.1574	0.06074														78.3768	0.098					65.5452	0.09086		74.3308	0.06642
69.8224	0.06511		84.0412	0.0752		71.2674	0.07214		62.4818	0.07747		71.672	0.08301		70.8628	0.08905		69.1288	0.08565		74.0418	0.06578														64.5626	0.04588					70.6894	0.07478		75.5446	0.07132
66.2966	0.07204		68.0884	0.07587		66.0076	0.07416		71.7298	0.09786		74.0996	0.08585		67.1058	0.06207		71.2096	0.07782		68.9554	0.06357														62.9442	0.06426					67.337	0.08063		77.2208	0.05646
79.2438	0.08503		75.718	0.09189		66.47	0.07196		72.25	0.09042		65.025	0.08681		63.58	0.06457		63.7534	0.05535		78.6658	0.07962														65.3718	0.03342					65.1406	0.07868		74.5042	0.08427
70.9784	0.08373		81.787	0.10362		75.4868	0.07984		71.7298	0.07572		66.3544	0.0725		58.2624	0.06586		74.1574	0.09001		73.695	0.07618														65.0828	0.05752					72.4812	0.08387		74.273	0.05273
74.9666	0.07746		80.5154	0.08689		70.1114	0.07093		69.649	0.08021		70.2848	0.08624		71.4986	0.10259		76.2382	0.06988		82.4228	0.06457														77.7988	0.09624					70.1114	0.07748		76.8162	0.04397
69.7646	0.06261		67.5682	0.07506		73.5794	0.08111		66.4122	0.08606		73.8684	0.08348		69.3022	0.09635		66.1232	0.07752		68.1462	0.0524														66.7012	0.04907					62.5974	0.0618		72.9436	0.07532
68.1462	0.06971		68.0884	0.08165		65.603	0.09047		69.36	0.05886		66.9902	0.08249		60.2854	0.07264		64.0424	0.08076		72.7702	0.08247														55.777	0.06551					66.8168	0.07544		82.365	0.06271
61.7882	0.07229		69.4756	0.09325		68.0884	0.0583		64.6204	0.06915		72.8858	0.08178		75.718	0.07706		59.823	0.06889		63.1754	0.06304														65.6608	0.04501					68.5508	0.06404		67.626	0.06141
78.7814	0.08833		70.5738	0.09228		70.9784	0.08001		70.5738	0.07193		76.7006	0.07843		71.7876	0.07515		65.5452	0.08204		78.4346	0.07631														61.0946	0.05268					63.7534	0.06142		78.4346	0.06591
74.7354	0.08197		68.6086	0.10979		64.9094	0.07612		78.2034	0.08644		77.163	0.0696		64.3892	0.07175		69.5334	0.08034		66.7012	0.065														75.0244	0.09108					72.7702	0.06513		71.7298	0.06199
71.961	0.08064		78.4924	0.09532		71.5564	0.07356		64.2158	0.07509		68.782	0.07761		77.3942	0.08968		68.5508	0.08921		67.7994	0.0754														69.1866	0.03868					68.6664	0.08396		71.4408	0.0604
71.383	0.07385		66.2388	0.07574		67.1058	0.08328		71.094	0.06679		69.8802	0.06853		67.5104	0.11785		75.718	0.09591		72.1922	0.06126														74.851	0.06658					67.9728	0.05089		64.2736	0.07888
73.3482	0.07035		76.1804	0.08083		68.493	0.0758		70.7472	0.08517		74.9088	0.08801		62.5396	0.08263		64.7938	0.06361		80.8622	0.07771														69.7646	0.07204					70.4004	0.03878		66.2966	0.05337
76.4694	0.06889		73.0592	0.09978		70.516	0.06955		66.759	0.07107		70.6894	0.06862		64.447	0.07791		67.1636	0.07258		76.9318	0.06138														63.869	0.08422					75.0822	0.06233		83.4632	0.08156
71.3252	0.07559		78.5502	0.08997		75.6602	0.05926		66.5856	0.071		73.695	0.07396		76.1226	0.08791		74.3886	0.07047		78.4924	0.07489														65.7764	0.0639					62.9442	0.06646		70.4582	0.05506
78.3768	0.0786		80.8044	0.09337		66.5856	0.08865		66.759	0.08444		66.5856	0.06041		70.1692	0.06768		68.2618	0.0743		79.186	0.075														60.401	0.06032					68.6664	0.06438		79.3016	0.10098
67.7416	0.06908		65.3718	0.07608		69.071	0.07965		67.6838	0.08122		84.7348	0.09888		60.8634	0.0759		74.1574	0.07774		67.4526	0.0614														82.076	0.05748					70.3426	0.04135		81.6714	0.03992
70.5738	0.07258		81.5558	0.09528		65.9498	0.07686		70.227	0.07741		75.6602	0.08259		80.5732	0.07995		75.14	0.07755		81.4402	0.07404														63.4644	0.06441					70.9206	0.06511		76.7006	0.07783
64.3892	0.06283		66.2966	0.08282		78.6658	0.07199		68.493	0.08023		66.4122	0.07239		66.6434	0.09445		65.2562	0.07858		62.5974	0.05071														72.4812	0.05665					71.961	0.07469		71.7298	0.06169
77.6832	0.08878		79.475	0.08425		76.9318	0.06631		65.7764	0.06874		70.3426	0.09018		68.3196	0.08097		68.493	0.08633		80.4576	0.06911														69.9958	0.04557					67.5104	0.07091		71.961	0.07968
65.603	0.06129		81.209	0.09612		69.3022	0.08031		60.5744	0.0651		74.851	0.07849		69.7068	0.07803		68.5508	0.08904		69.7068	0.0769														71.7876	0.03046					76.8162	0.06524		75.718	0.05527
68.5508	0.06241		77.1052	0.08753		65.6608	0.07828		66.7012	0.09171		69.7646	0.08062		74.6776	0.07166		69.071	0.07544		67.2792	0.06914														66.181	0.06097					65.4874	0.06521		67.6838	0.05978
68.204	0.06732		65.5452	0.08401		70.4004	0.07044		66.5856	0.09442		67.3948	0.08437		61.3836	0.09688		72.6546	0.07565		72.8858	0.06732														75.429	0.08569					72.4234	0.07832		72.9436	0.07166
69.1866	0.05866		68.9554	0.08818		69.8802	0.0734		66.6434	0.09243		73.5794	0.07381		64.7938	0.07992		65.1984	0.06977		86.1798	0.08547														74.7932	0.08693					74.9088	0.08403		71.2674	0.07947
75.718	0.06308		69.1288	0.0744		73.5794	0.0767		69.649	0.06983		69.1866	0.08542		67.7994	0.09018		71.672	0.08175		73.3482	0.07115														58.2624	0.05439					77.1052	0.08393		67.7416	0.04491
64.5048	0.06242		78.8392	0.09667		65.0828	0.07206		68.2618	0.07301		69.1288	0.06962		63.4066	0.08876		69.36	0.08158		63.291	0.04863														62.135	0.05724					66.7012	0.06679		79.9374	0.09063
71.7876	0.07866		79.475	0.08745		68.0884	0.05784		70.8628	0.08312		67.2792	0.07245		73.984	0.08674		62.5974	0.06696		72.0188	0.06538														73.117	0.0637					63.8112	0.0622		80.631	0.07794
65.7186	0.07345		83.1742	0.08919		72.3656	0.07429		69.071	0.08537		71.672	0.06517		70.9784	0.07969		68.5508	0.07492		77.2786	0.07876														61.6148	0.04778					68.782	0.06275		71.7298	0.07594
68.2618	0.05791		68.5508	0.07894		65.892	0.0543		64.447	0.06323		82.5384	0.09014		74.0418	0.07328		67.2214	0.07662		67.1636	0.05101														73.8106	0.08391					71.5564	0.07173		72.7702	0.0814
63.7534	0.09612		72.25	0.08512		71.094	0.07475		62.0194	0.06997		67.626	0.06955		64.5048	0.07885		59.4762	0.07341		71.2096	0.0655														70.6894	0.03362					60.5166	0.05772		65.3718	0.04771
69.3022	0.06355		72.1344	0.08131		82.7696	0.07236		72.539	0.07961		71.094	0.09386		75.9492	0.09193		72.1922	0.11442		71.0362	0.05858														69.9958	0.04467					71.7298	0.06862		61.6726	0.06214
65.3718	0.05585		65.7186	0.08016		70.1692	0.08064		64.736	0.09546		80.2842	0.09084		74.562	0.09936		67.5104	0.07072		69.2444	0.06674														70.0536	0.05318					69.5334	0.058		72.6546	0.06683
62.9442	0.08231		74.0996	0.09691		81.3246	0.07252		71.672	0.0837		78.1456	0.0761		66.2966	0.08725		63.002	0.07709		76.2382	0.086														71.9032	0.07951					75.8336	0.07446		66.5278	0.0653
70.7472	0.07068		70.5738	0.07332		69.36	0.09179		75.2556	0.09674		79.9374	0.08472		57.222	0.07074		61.3836	0.07546		65.892	0.06241														70.9784	0.05759					62.7708	0.04298		63.4644	0.06247
68.493	0.06778		71.383	0.08825		63.8112	0.09637		68.5508	0.08097		69.3022	0.08793		63.9846	0.06608		68.0884	0.07266		73.2326	0.06493														68.6664	0.05489					65.7764	0.0809		70.1114	0.05015
77.0474	0.08272		70.1114	0.0871		80.92	0.07824		75.6024	0.11431		80.631	0.08238		74.4464	0.08825		60.2854	0.06504		78.5502	0.07502														75.0822	0.07338					65.603	0.06847		66.9324	0.06581
70.2848	0.07601		68.3196	0.07423		67.7994	0.08195		67.048	0.09241		72.3078	0.08259		70.9784	0.08751		64.736	0.06345		64.3314	0.06461														67.626	0.04521					68.3196	0.06258		68.6664	0.05113
67.048	0.07247		69.1288	0.07744		78.8392	0.067		68.8976	0.09346		72.3656	0.08654		67.6838	0.07181		66.0654	0.08262		76.0648	0.05523														81.3824	0.05421					67.5104	0.0809		73.406	0.06205
71.1518	0.07091		76.2382	0.09429		80.4576	0.07526		72.8858	0.06633		73.117	0.10147		67.6838	0.07087		64.2736	0.05791		67.626	0.08077														71.383	0.0771					66.47	0.06744		65.4296	0.06769
69.071	0.07824		76.9318	0.08269		66.0654	0.06361		66.0654	0.07834		71.2674	0.0787		65.1984	0.10184		61.6726	0.07969		74.2152	0.06952														59.4762	0.08791					76.5272	0.05745		77.741	0.05704
70.9206	0.06766		69.5334	0.0948		67.915	0.07787		65.7764	0.07203		74.6198	0.08669		68.493	0.07008		66.0654	0.08439		65.4874	0.06908														69.9958	0.10339					67.337	0.06473		61.2102	0.05713
70.4004	0.0748		72.7702	0.08274		76.7584	0.08611		65.025	0.0787		66.3544	0.072		63.6956	0.08087		79.9952	0.0753		66.9324	0.06577														76.5272	0.07135					65.5452	0.06383		65.1406	0.05408
65.025	0.07456		63.869	0.07014		68.8398	0.06904		59.6496	0.07405		73.7528	0.08897		67.2214	0.08672		70.1692	0.08095		77.452	0.08482														73.695	0.06467					65.5452	0.07694		68.6086	0.06474
67.3948	0.07205		68.0884	0.07194		79.5328	0.0789		60.1698	0.06099		62.713	0.09049		66.2388	0.07793		63.7534	0.08228		67.6838	0.05347														58.667	0.0531					70.227	0.08126		71.1518	0.06373
65.7764	0.06515		81.3246	0.08604		74.4464	0.06756		59.4184	0.08299		77.741	0.0813		63.1754	0.07387		77.6832	0.09655		69.649	0.07008														70.9206	0.09115					67.1058	0.07054		67.7416	0.07738
72.3078	0.06837		71.7876	0.09295		72.9436	0.0497		63.002	0.06322		65.3718	0.07485		72.0766	0.09537		73.3482	0.09269		74.1574	0.06753														64.9094	0.04244					79.1282	0.07785		77.2208	0.05516
62.9442	0.05834		68.782	0.08258		72.3656	0.07148		70.4582	0.0807		72.4234	0.08059		71.7876	0.08005		65.4296	0.07921		70.4004	0.06998														66.181	0.10304					71.6142	0.07807		74.851	0.08978
66.9902	0.0623		79.6484	0.08888		71.2674	0.07445		67.7994	0.07063		62.424	0.07391		75.14	0.07606		70.1114	0.05809		73.6372	0.05977														63.7534	0.04759					62.3084	0.08403		77.5098	0.04866
70.8628	0.07727		69.649	0.07551		68.8976	0.0767		65.4296	0.07964		74.9088	0.07666		70.8628	0.07778		68.4352	0.06452		75.8914	0.07524														77.1052	0.08976					61.4414	0.063		74.0996	0.05284
61.3258	0.03395		73.0014	0.08116		72.3078	0.06576		67.337	0.07127		76.3538	0.07604		62.9442	0.07316		69.1288	0.08249		72.3078	0.07005														68.2618	0.03979					66.7012	0.05067		65.0828	0.06058
66.9324	0.07113		86.5844	0.09096		67.6838	0.06491		63.6956	0.08767		71.383	0.08984		66.0654	0.07901		75.14	0.07534		74.6198	0.07228														71.9032	0.03494					79.2438	0.06037		72.6546	0.06606
68.782	0.06698		63.58	0.0823		77.7988	0.1023		68.8976	0.09039		75.9492	0.0846		62.8864	0.06934		73.406	0.07994		69.4756	0.07326														77.6254	0.09128					79.186	0.05764		62.5396	0.07257
72.5968	0.07121		69.0132	0.08098		72.5968	0.06955		54.7944	0.05161		66.5856	0.08127		69.071	0.07974		61.0368	0.07822		76.296	0.08129														72.8858	0.0649					70.1114	0.06941		60.401	0.04981
60.2276	0.07408		68.4352	0.08672		63.58	0.07053		68.8398	0.07679		77.2786	0.09774		68.4352	0.07455		63.869	0.07527		78.7814	0.06403														63.4644	0.0615					75.1978	0.05055		64.6204	0.0558
67.4526	0.07116		69.0132	0.08962		68.204	0.07563		62.5974	0.0786		75.0244	0.08585		69.5334	0.07744		70.2848	0.08099		69.9958	0.07983														68.4352	0.06938					63.1176	0.0551		68.7242	0.0698
65.8342	0.06587		80.92	0.09805		65.7186	0.06423		64.9094	0.08746		64.9672	0.06074		70.6894	0.09812		66.4122	0.08183		72.4812	0.06424														73.1748	0.07734					62.3084	0.03877		70.1114	0.053
69.938	0.07301		78.2034	0.10167		70.4004	0.06438		66.7012	0.07724		66.5278	0.07818		69.938	0.07054		67.626	0.08226		68.9554	0.06723														65.3718	0.05536					64.736	0.06307		74.6198	0.07458
62.3084	0.06378		78.8392	0.09753		81.4402	0.08961		67.7416	0.09012		66.181	0.07807		75.0244	0.08932		63.4644	0.05666		78.6658	0.06828														68.0884	0.06382					66.7012	0.07064		66.5278	0.06376
63.0598	0.05195		85.833	0.08699		66.0654	0.05783		61.9038	0.10056		62.3662	0.0568		69.071	0.14395		60.0542	0.05042		68.8976	0.05096														64.5048	0.06755					68.8398	0.06748		70.1114	0.06007
68.2618	0.07463		79.9374	0.10261		71.5564	0.06752		75.5446	0.10001		64.0424	0.08598		65.6608	0.09563		74.273	0.07413		69.649	0.06448														68.6664	0.05609					66.3544	0.05578		80.631	0.0979
64.2736	0.06029		65.2562	0.07788		73.5794	0.06135		77.5098	0.09093		75.429	0.11817		68.782	0.07337		75.5446	0.08805		67.7416	0.06667														64.3892	0.02879					69.1288	0.06695		63.9268	0.05696
71.6142	0.06742		81.3824	0.08509		77.7988	0.0803		64.5048	0.08452		68.5508	0.0783		56.7018	0.05753		75.14	0.08277		77.163	0.09106														54.91	0.09476					67.5104	0.06432		66.1232	0.05672
67.2214	0.07259		74.1574	0.0813		71.3252	0.07687		62.8286	0.075		72.6546	0.09132		63.0598	0.08654		73.3482	0.08491		76.874	0.07779														65.6608	0.05417					72.8858	0.07326		61.0946	0.06197
72.3656	0.07155		68.6086	0.09898		75.2556	0.0784		68.6664	0.07628		70.4582	0.09024		63.9846	0.07721		71.6142	0.07114		59.9386	0.05428														70.1692	0.096					71.4408	0.06042		67.048	0.04442
75.8914	0.06146		64.2736	0.06999		74.0996	0.07631		62.4818	0.07465		73.3482	0.07022		68.6664	0.08532		63.4644	0.07399		74.2152	0.07452														59.9964	0.04677					70.9784	0.06389		61.3258	0.05478
74.9666	0.08711		67.6838	0.101		61.846	0.04807		66.6434	0.07471		80.2842	0.08701		70.6894	0.07228		67.8572	0.08149		65.4874	0.05279														73.3482	0.02034					71.7876	0.05642		75.8914	0.08004
63.9268	0.06277		64.6204	0.06489		70.6316	0.07514		62.713	0.07967		62.713	0.08391		73.117	0.07812		68.4352	0.07562		72.9436	0.06278														70.227	0.09266					67.9728	0.06695		68.0306	0.08751
67.7416	0.07933		78.8392	0.07944		79.1282	0.07487		68.0884	0.06252		66.0076	0.0744		68.0884	0.06454		61.6726	0.06723		78.319	0.06901														74.9088	0.04076					71.2674	0.07365		68.3196	0.04905
69.5912	0.07859		71.961	0.08836		82.5384	0.08307		70.1692	0.06871		67.7416	0.08188		71.7298	0.09313		68.6664	0.07231		67.2792	0.06329														78.7814	0.08704					80.8622	0.08504		73.8106	0.05996
67.7416	0.08029		77.9144	0.09575		71.4986	0.06892		67.2792	0.0706		75.9492	0.09158		61.7304	0.08134		81.3824	0.07889		71.4408	0.04759														73.4638	0.0615					76.007	0.05289		75.1978	0.07762
72.25	0.07288		71.2674	0.09444		69.5912	0.07012		72.7124	0.09246		64.9672	0.09024		73.117	0.08962		65.8342	0.06225		67.1058	0.06068														58.089	0.02806					66.8746	0.07024		63.8112	0.06203
61.6148	0.06707		72.0188	0.08925		79.8218	0.08635		66.5856	0.07492		70.0536	0.0725		65.5452	0.07324		72.539	0.07284		77.163	0.06601														71.094	0.10062					71.1518	0.06386		76.7584	0.0516
64.9672	0.07484		84.2724	0.09781		70.1692	0.07739		66.759	0.07012		72.1922	0.08305		73.6372	0.08997		61.0946	0.07231		68.9554	0.06546														67.626	0.02861					65.1406	0.07849		76.4694	0.06967
59.5918	0.06429		64.5048	0.07814		65.603	0.07156		60.3432	0.0646		73.8106	0.08455		74.9666	0.09176		74.7354	0.08814		65.314	0.04882														69.9958	0.06357					66.8746	0.06059		68.0884	0.06121
68.782	0.06853		73.406	0.08448		79.5906	0.11355		68.5508	0.075		66.9902	0.07652		80.5732	0.09371		77.6832	0.08228		69.649	0.06551														64.2736	0.0601					69.8224	0.05789		70.0536	0.06017
66.0076	0.07924		71.5564	0.08465		64.2158	0.0573		63.7534	0.09399		72.4234	0.07155		73.695	0.08966		61.4414	0.07133		71.672	0.07283														61.9038	0.05257					61.9616	0.07029		70.8628	0.05392
73.2904	0.0897		75.429	0.09226		63.4644	0.05895		66.181	0.08176		74.851	0.08009		69.1288	0.09885		68.3774	0.071		63.9268	0.05832														62.8864	0.08431					69.36	0.05036		76.7006	0.05167
71.3252	0.0982		85.8908	0.06668		69.3022	0.06497		71.961	0.07987		75.2556	0.07962		75.14	0.08614		69.7068	0.08538		79.764	0.0788														73.117	0.09281					67.3948	0.06999		66.7012	0.06016
70.4582	0.06384		74.0418	0.08404		65.603	0.0691		65.025	0.07584		70.805	0.08763		62.9442	0.08115		80.053	0.07927		72.0188	0.07787														64.3892	0.04235					71.4408	0.05807		70.3426	0.0631
78.7814	0.06665		66.759	0.0623		65.7186	0.06127		80.053	0.08381		70.9206	0.08281		64.5626	0.08355		67.626	0.08475		72.1922	0.07665														73.0592	0.07609					63.4644	0.0598		71.7876	0.07818
61.6726	0.06308		69.0132	0.07867		66.9324	0.081		81.0356	0.10465		84.099	0.08988		72.1344	0.07671		71.3252	0.07995		77.2786	0.07615														72.1922	0.06438					73.984	0.07465		70.4582	0.07284
72.25	0.06931		75.718	0.09845		69.8802	0.07146		51.7888	0.06123		70.0536	0.09327		65.6608	0.08578		74.2152	0.0784		76.0648	0.08346														76.3538	0.05994					73.0014	0.06595		66.3544	0.05838
68.3196	0.08757		73.0592	0.10049		72.539	0.04371		70.2848	0.09126		76.0648	0.07572		63.002	0.07416		64.6204	0.06723		75.7758	0.06566														75.3134	0.05714					75.7758	0.07517		68.0884	0.05323
72.1344	0.06999		81.9604	0.08822		84.0412	0.08895		74.851	0.07547		76.8162	0.08454		72.9436	0.0905		67.2792	0.09223		72.7702	0.05807														86.0064	0.12012					64.8516	0.05875		71.2096	0.06594
73.695	0.07931		71.383	0.07918		73.117	0.07262		69.4756	0.07595		69.0132	0.08712		65.4296	0.06369		68.493	0.06745		77.2208	0.06397														75.0822	0.15121					65.1406	0.05622		66.9902	0.07481
67.2214	0.07161		60.1698	0.06864		84.6192	0.08592		59.823	0.06716		77.2208	0.10713		61.4414	0.08266		58.5514	0.06776		75.2556	0.08132														73.6372	0.0504					69.7068	0.08511		66.759	0.1028
64.5048	0.0571		66.6434	0.0712		60.8634	0.06681		70.516	0.07322		81.9026	0.08673		73.4638	0.07361		75.718	0.0758		86.8156	0.07673														71.2096	0.07417					74.0996	0.07761		65.3718	0.07423
62.5974	0.06165		65.3718	0.07578		72.7124	0.0687		64.158	0.08243		76.007	0.06962		63.58	0.08129		58.0312	0.0553		72.7124	0.07599														69.938	0.06226					69.7068	0.06757		70.1692	0.04722
63.002	0.06583		71.961	0.0923		61.2102	0.07197		66.7012	0.0531		79.8218	0.09266		70.1114	0.06896		76.8162	0.10096		63.8112	0.05735														62.8864	0.05299					73.695	0.07927		72.8858	0.07519
67.1636	0.07325		78.2612	0.09008		69.649	0.0807		62.8864	0.06106		64.1002	0.06886		81.3246	0.08533		69.1288	0.06914		78.608	0.06795														63.6956	0.04458					65.025	0.07509		76.007	0.06598
61.7882	0.05942		69.5912	0.08501		75.3134	0.06366		60.3432	0.08911		80.1686	0.07484		64.158	0.07393		66.6434	0.07729		74.5042	0.07144														69.5912	0.04507					77.163	0.06192		71.1518	0.03841
71.094	0.07346		70.516	0.10285		62.135	0.07458		65.025	0.07249		76.9318	0.06964		72.7702	0.06722		72.6546	0.07463		67.5682	0.06167														74.9666	0.06217					71.3252	0.06446		72.1922	0.08401
68.0884	0.07014		77.2786	0.10172		68.3774	0.08032		71.7876	0.08181		81.9604	0.0887		73.0592	0.09112		64.9094	0.07418		69.7068	0.0774														68.6086	0.069					66.9324	0.08187		63.869	0.05207
66.2966	0.05512		68.3196	0.07507		76.1226	0.10668		74.6198	0.0878		68.3196	0.0681		64.3314	0.07813		66.759	0.0767		71.961	0.06202														68.0306	0.04801					70.3426	0.07231		71.1518	0.05
73.984	0.06884		79.764	0.09485		82.1338	0.07633		69.0132	0.08103		75.5446	0.08334		80.8044	0.08482		69.3022	0.0919		71.3252	0.07088														62.3662	0.04271					65.025	0.05412		67.8572	0.07136
64.9672	0.06098		66.7012	0.08504		78.03	0.07381		66.8746	0.0832		69.9958	0.08294		68.3774	0.07507		70.1114	0.08375		72.7702	0.06109														68.782	0.07236					68.3774	0.06124		63.1754	0.04321
65.7186	0.07312		69.4178	0.07962		71.3252	0.08176		67.048	0.08353		74.7932	0.08041		67.5104	0.07898		68.3196	0.07352		74.5042	0.08023														63.1754	0.07089					64.8516	0.05346		72.7702	0.0674
74.0418	0.08254		75.1978	0.08435		72.539	0.07385		69.8802	0.08216		64.9094	0.08211		74.9666	0.06067		76.0648	0.08303		70.3426	0.06343														66.759	0.10322					64.6782	0.07014		73.406	0.04901
74.1574	0.07895		76.1804	0.08583		68.0306	0.07726		72.4812	0.06596		70.1692	0.0695		67.2214	0.07761		66.2966	0.07177		80.1686	0.0672														64.8516	0.06397					72.5968	0.0606		69.938	0.0704
62.9442	0.06297		72.539	0.0814		79.2438	0.08233		67.5682	0.07165		79.475	0.08493		64.5626	0.0936		75.14	0.0829		75.2556	0.06482														62.5974	0.06019					68.0306	0.06168		61.557	0.0637
72.3078	0.07714		67.1636	0.07816		79.8218	0.06867		67.5682	0.0831		69.4178	0.07657		73.1748	0.09427		70.805	0.06813		67.2792	0.06851														71.961	0.06992					65.4874	0.05907		65.4874	0.06288
71.0362	0.07791		74.7932	0.08547		67.337	0.06589		71.2674	0.07136		70.6894	0.07005		69.5334	0.08331		64.447	0.07238		59.7074	0.04533														74.3308	0.08205					60.7478	0.05945		74.3886	0.05947
65.314	0.06024		78.7814	0.08873		72.8858	0.07353		60.8634	0.06819		69.5334	0.07806		72.828	0.10048		70.227	0.06978		75.6024	0.05711														78.4924	0.11186					75.6024	0.07104		67.6838	0.05603
66.0076	0.06752		71.9032	0.09025		76.5272	0.08094		64.2736	0.06731		71.961	0.07722		65.5452	0.07684		69.071	0.08488		66.7012	0.06394														72.3078	0.06591					70.5738	0.08834		66.8746	0.06368
66.0654	0.06604		70.1692	0.08499		80.342	0.07707		63.4644	0.07989		67.7994	0.07195		64.447	0.07568		63.5222	0.08257		78.5502	0.07314														64.5626	0.05354					64.3892	0.06682		72.25	0.06383
66.4122	0.06621		68.5508	0.10236		73.406	0.07667		75.1978	0.07638		73.1748	0.09841		69.9958	0.09703		68.7242	0.06728		70.4004	0.06528														73.4638	0.05173					70.8628	0.07449		65.9498	0.06002
75.14	0.14634		73.695	0.06981		70.805	0.07276		72.7124	0.08931		69.8224	0.0757		68.3196	0.11166		69.36	0.08466		73.0014	0.06162														65.603	0.05826					62.713	0.05784		71.7298	0.07909
70.9784	0.07018		80.053	0.08682		68.8976	0.05972		65.5452	0.07001		68.9554	0.04734		67.9728	0.08621		73.2326	0.08893		68.493	0.05792														72.4812	0.09532					68.1462	0.06907		66.0654	0.05205
59.3028	0.07474		68.782	0.06176		75.3134	0.07818		71.383	0.10434		74.1574	0.07878		71.383	0.0852		72.6546	0.07246		76.1226	0.06162														63.6956	0.03578					79.0126	0.06572		74.3886	0.08371
65.7186	0.08542		76.4694	0.09632		67.7994	0.07123		60.69	0.06386		76.1226	0.09888		68.6664	0.08225		78.6658	0.08661		74.6198	0.067														60.69	0.04154					74.0996	0.0924		68.7242	0.06278
65.7186	0.0629		71.7298	0.08497		80.3998	0.08079		66.759	0.07516		65.4874	0.0836					72.828	0.06755		80.4576	0.07276														73.117	0.06576					68.8398	0.05507		79.1282	0.05447
63.0598	0.08426		71.0362	0.08231		67.2214	0.07683		69.8802	0.08177		63.2332	0.06988					66.5856	0.06327		78.7814	0.06194														74.6198	0.07688					67.1058	0.06275		73.695	0.06122
73.117	0.07694		63.7534	0.07165		62.8286	0.07534		74.0996	0.09657		84.5036	0.10467					64.3314	0.0908		78.319	0.07014														65.0828	0.06815					69.4178	0.05139		73.0592	0.07687
75.14	0.07028		74.9088	0.09537		74.4464	0.06506		64.3314	0.07563		63.869	0.06963					66.2966	0.09311		77.9722	0.06525														78.7814	0.08905					73.3482	0.06303		66.7012	0.06259
73.8684	0.06413		78.03	0.08313		71.4986	0.08127		62.3084	0.08761		69.649	0.07179					66.9902	0.07604		77.1052	0.07589														59.4762	0.03686					72.7124	0.08256		70.805	0.05359
65.4296	0.06848		75.8336	0.07653		77.163	0.09057		65.7186	0.0687		75.3134	0.10462					71.383	0.07763		76.4694	0.06134														62.8864	0.05318					60.5744	0.06992		69.9958	0.05426
69.8802	0.0757		73.4638	0.08566		71.094	0.06778		63.869	0.06855		83.5788	0.09444					73.7528	0.06916		63.291	0.06445														60.2854	0.05036					72.0766	0.06539		62.8286	0.06915
67.6838	0.06575		74.7932	0.09579		71.9032	0.07363		71.4986	0.08569		71.0362	0.07728					67.5104	0.077		86.7	0.09056														61.6148	0.05141					63.6956	0.05641		70.4004	0.06511
66.9902	0.07644		71.2096	0.08083		77.2208	0.09395		61.3836	0.08189		74.562	0.07067					78.2034	0.08999		68.0884	0.07135														69.36	0.07681					69.3022	0.05998		72.4234	0.04973
73.984	0.07154		80.8622	0.079		77.163	0.07021		73.8684	0.08131		71.5564	0.07412					66.5278	0.07036		66.8168	0.05518														58.6092	0.05351					69.1288	0.06602		73.8684	0.06107
74.2152	0.06852		75.8336	0.08631		65.4296	0.06335		67.9728	0.08613		65.1984	0.07928					64.158	0.08293		78.897	0.0737														71.6142	0.07856					73.3482	0.07155		68.8398	0.06264
65.4874	0.05645		67.2214	0.07133		70.227	0.05969		75.6024	0.08653		72.4812	0.07564					66.7012	0.05712		71.7298	0.06361														74.1574	0.08881					74.3308	0.07626		64.8516	0.08673
69.3022	0.07435		71.9032	0.09248		66.8168	0.07692		69.0132	0.08289		72.7702	0.09638					73.406	0.08875		66.2966	0.05608														67.048	0.06238					60.2854	0.04963		67.1636	0.05863
68.0306	0.06699		68.6086	0.09091		74.0418	0.08097		73.0592	0.10485		74.0418	0.07853					68.0884	0.06886		67.7416	0.05417														59.4762	0.03635					64.3892	0.06067		78.5502	0.0694
71.0362	0.08253		69.4756	0.0722		68.4352	0.05884		80.8044	0.08647		59.9964	0.08522					67.7994	0.06841		76.874	0.06438														64.0424	0.09024					73.0014	0.05572		76.4694	0.05663
62.713	0.07697		67.9728	0.08957		64.9094	0.0746		70.805	0.09277		79.1282	0.08071					67.337	0.07633		77.2786	0.06741														73.8684	0.06563					73.3482	0.06916		70.1692	0.05627
71.1518	0.08044		64.8516	0.06796		61.4414	0.0493		63.002	0.06599		73.0592	0.07752					65.0828	0.09535		66.9902	0.06585														67.2792	0.05443					72.0766	0.07341		75.0822	0.06936
71.1518	0.08437		68.493	0.06919		67.7416	0.0788		73.695	0.07909		78.2034	0.07749					71.2674	0.07195		66.9324	0.06779														65.314	0.06309					69.1288	0.04551		64.0424	0.05104
74.3308	0.06694		76.9896	0.077		67.2792	0.06406		64.6782	0.09798		62.3662	0.07505					67.5104	0.08624		68.6664	0.07378														79.9952	0.08969					65.314	0.06311		69.3022	0.06577
72.8858	0.07691		81.5558	0.08678		69.1288	0.07766		63.4066	0.09266		74.4464	0.07815					71.383	0.0825		52.309	0.04315														64.1002	0.06858					71.4408	0.06015		67.2792	0.05671
64.2158	0.06268		66.1232	0.07772		69.8802	0.07331		66.47	0.07673		72.4812	0.09267					70.6316	0.07492		64.6204	0.06284														76.874	0.03926					77.2786	0.07785		73.0014	0.05519
60.9212	0.06746		63.1176	0.08474		64.447	0.06727		62.4818	0.05882		72.0766	0.12925					74.0996	0.06847		70.9206	0.06411														71.961	0.05588					64.5626	0.05564		71.0362	0.05212
75.1978	0.07437		73.3482	0.07325		64.9094	0.08347		62.5396	0.07661		72.8858	0.07622					71.5564	0.06556		76.296	0.0667														67.337	0.05397					72.4234	0.0684		74.562	0.06137
71.2096	0.06677		72.5968	0.08425		69.8224	0.06899		67.1636	0.08528		80.342	0.09963					69.1288	0.06053		73.984	0.0723														65.1406	0.07788					64.6204	0.06415		62.135	0.04994
63.4066	0.07258		75.3134	0.07511		68.0306	0.07685		66.5856	0.09636		79.3016	0.07927					66.0654	0.07562		63.4644	0.06048														63.1754	0.06379					64.6782	0.08015		71.2096	0.08096
65.314	0.06183		68.8976	0.07055		68.6664	0.07049		66.5856	0.07231		75.8914	0.06815					70.8628	0.07717		75.14	0.07118														66.759	0.03853					67.1636	0.06614		81.6714	0.07979
78.7814	0.07591		77.5098	0.10098		72.6546	0.06059		67.1636	0.07023		82.7696	0.07382					72.1922	0.08766		72.3078	0.06614														60.2276	0.02896					68.0306	0.06513		73.1748	0.06338
65.314	0.07582		72.1922	0.09379		72.0188	0.06558		70.6316	0.10539		71.094	0.072					69.1866	0.07778		74.7932	0.0581														67.5682	0.04764					69.7068	0.08759		70.516	0.06137
75.6602	0.07967		76.1804	0.08583		64.1002	0.05487		61.4414	0.08916		86.5266	0.08798					61.0368	0.07159		64.158	0.06316														68.2618	0.06838					66.8746	0.06389		64.447	0.05214
72.0188	0.07705		70.516	0.06834		72.828	0.08381		61.4992	0.05918		65.4874	0.07936					70.1692	0.08842		77.5676	0.06385														75.2556	0.09274					70.8628	0.06632		67.6838	0.04413
70.4582	0.07487		66.9902	0.09572		78.0878	0.08263		72.1344	0.09012		67.048	0.07959					76.3538	0.06632		71.2096	0.06721														69.1866	0.04858					67.5104	0.06745		76.4116	0.06026
75.4868	0.08118		77.2208	0.08728		64.2736	0.0555		62.135	0.07354		80.5154	0.10676					74.7354	0.08082		75.4868	0.05695														72.1344	0.08388					69.4756	0.06736		68.9554	0.08875
67.8572	0.07668		70.2848	0.09317		69.1288	0.07643		71.1518	0.08618		77.5098	0.08444					73.984	0.07717		73.4638	0.08367														66.1232	0.04872					71.8454	0.07493		63.6378	0.04868
66.9902	0.0657		74.273	0.07776		84.2146	0.0843		71.2674	0.09012		72.7124	0.07313					72.9436	0.07597		69.9958	0.06431														57.4532	0.05963					75.718	0.07499		67.4526	0.05739
65.6608	0.07471		73.8106	0.07029		64.2158	0.06324		58.5514	0.06152		69.4178	0.07827					66.2966	0.07734		60.9212	0.06651														71.4986	0.07099					69.5334	0.06202		67.5104	0.05788
78.6658	0.09453		67.2792	0.07491		79.9374	0.09871		62.0772	0.05558		79.8218	0.07763					69.4756	0.08852		63.6378	0.06133														78.319	0.064					71.383	0.06471		72.4812	0.06371
73.1748	0.0706		73.117	0.06785		60.1698	0.0664		67.337	0.0902		67.7416	0.07824					65.2562	0.07341		66.759	0.06324														71.4986	0.04419					72.4234	0.06604		62.8864	0.06849
72.1344	0.07643		78.3768	0.0949		69.1866	0.07142		73.7528	0.08662		73.5216	0.06427					68.5508	0.08462		68.5508	0.04883														77.3364	0.10829					66.9324	0.0732		81.9604	0.06789
66.9324	0.06456		80.1108	0.08921		66.759	0.06055		76.1804	0.07965		71.3252	0.0744					62.2506	0.10083		73.2904	0.0775														72.5968	0.05489					63.9268	0.07111		70.3426	0.07418
65.892	0.0727		76.3538	0.08754		74.273	0.08826		69.1288	0.08554		68.782	0.08116					70.805	0.09084		68.8976	0.06115														58.4936	0.05059					78.9548	0.10901		69.4756	0.08576
67.7416	0.08383		67.2214	0.07589		72.6546	0.075		64.3892	0.07653		71.9032	0.07422					73.3482	0.07539		78.03	0.06303														69.7068	0.04401					66.8168	0.06772		73.2904	0.04418
64.8516	0.07484		71.4986	0.07221		65.314	0.07302		74.3886	0.07354		73.8684	0.08997					69.2444	0.09711		64.5626	0.06148														68.8976	0.06723					77.0474	0.09162		72.5968	0.06346
63.0598	0.0883		64.9672	0.07921		74.6776	0.08065		70.4004	0.08692		79.6484	0.09017					68.0884	0.09445		72.7124	0.07706														66.3544	0.07383					71.7876	0.08365		67.1058	0.05324
69.1288	0.06917		75.6024	0.09089		70.7472	0.06963		66.1232	0.08333		64.6204	0.06993					72.5968	0.07584		65.6608	0.06753														73.1748	0.09125					71.3252	0.05594		65.1984	0.07014
65.5452	0.05871		70.7472	0.0841		72.1344	0.07679		61.9616	0.1039		76.7006	0.09048					69.1866	0.08558		78.7814	0.08576														61.6148	0.0443					66.0076	0.07219		74.9088	0.07383
69.071	0.07313		67.7994	0.08111		70.6316	0.08646		77.2786	0.08952		76.2382	0.07656					78.897	0.08534		67.4526	0.0544														73.8106	0.03116					68.4352	0.09895		65.892	0.05672
60.8634	0.05895		78.03	0.08603		64.6782	0.05956		71.6142	0.08516		66.181	0.08371					76.5272	0.08273		67.2792	0.05271														71.961	0.08157					70.0536	0.06272		75.5446	0.07221
76.4694	0.0541		69.5334	0.082		77.163	0.072		74.7354	0.10235		67.337	0.07774					66.7012	0.07392		62.6552	0.06732														66.759	0.10923					62.424	0.06636		69.649	0.06995
71.094	0.08042		86.2376	0.08809		72.7124	0.05084		72.0188	0.09155		68.8398	0.08788					81.787	0.09338		69.7068	0.05772														71.3252	0.0488					69.0132	0.05977		67.7994	0.06592
69.2444	0.06677		73.695	0.0895		77.0474	0.07115		65.3718	0.06939		73.7528	0.08246					69.7068	0.07732		83.6366	0.07354														76.8162	0.05708					67.2792	0.05066		68.204	0.06557
71.2674	0.08152		75.1978	0.08585		76.8162	0.06763		63.1176	0.08368		74.273	0.08891					76.4694	0.08183		72.1922	0.06209														83.0008	0.07808					68.204	0.06584		69.7646	0.092
64.6204	0.07004		80.7466	0.07998		64.1002	0.06153		69.1866	0.08072		60.5166	0.07473					80.2264	0.10424		67.4526	0.05318														75.7758	0.06983					68.3196	0.06755		79.9952	0.06952
68.6086	0.0707		79.8218	0.08541		67.915	0.06546		65.7186	0.06615		69.7646	0.07667					68.3196	0.06735		69.4756	0.0569														59.7074	0.04926					65.4874	0.0787		70.1692	0.07595
64.5048	0.06381		74.3308	0.07736		75.3134	0.07377		71.672	0.09095		78.03	0.08036					60.5744	0.07959		70.4004	0.08703														79.1282	0.05404					67.2792	0.07436		82.5384	0.07671
74.3308	0.0773		76.8162	0.08165		68.7242	0.06913		66.5856	0.06684		80.92	0.08263					78.2612	0.09278		67.337	0.05371														66.47	0.06668					69.4756	0.03878		64.8516	0.06363
63.3488	0.05515		74.7932	0.08971		81.498	0.08031		61.0946	0.07928		76.7584	0.0921					70.2848	0.07122		70.6894	0.08754														79.9374	0.0515					77.9722	0.07717		69.9958	0.08706
67.337	0.07336		71.094	0.07282		59.7652	0.06353		69.1288	0.09416		67.1058	0.10519					71.6142	0.08372		71.2674	0.06726														65.6608	0.02801					64.6782	0.05997		60.1698	0.05695
69.0132	0.06729		71.3252	0.0704		79.8796	0.07221		62.8286	0.07153		76.874	0.08784					76.4116	0.07572		68.7242	0.05602														76.7584	0.13278					71.094	0.07549		75.0244	0.06546
66.4122	0.06959		67.8572	0.07221		64.2736	0.06456		67.7416	0.08766		67.9728	0.09521					70.0536	0.06845		68.493	0.06249														62.424	0.05754					65.4296	0.05811		77.3942	0.10125
72.539	0.07831		66.5856	0.07338		72.0188	0.06847		73.1748	0.08653		74.7932	0.07412					65.1984	0.08809		75.2556	0.07806														68.9554	0.0909					74.4464	0.07906		76.296	0.07404
67.626	0.07583		73.8684	0.07117		72.5968	0.09157		64.6204	0.08391		77.5098	0.08422					63.4644	0.06798		74.273	0.06639														70.227	0.09371					75.1978	0.07344		68.7242	0.05532
66.9902	0.06509		77.3942	0.0848		75.0244	0.08695		61.4414	0.07568		68.3774	0.0809					74.6776	0.09489		65.7764	0.0525														75.0822	0.07194					68.782	0.07256		73.2904	0.06913
78.03	0.07132		69.36	0.08642		71.9032	0.07133		71.7298	0.07875		65.9498	0.0695					73.984	0.08898		68.0306	0.07511														82.3072	0.08732					61.6726	0.0764		70.4582	0.068
77.2786	0.08063		78.4346	0.08222		79.3016	0.07632		67.626	0.08592		79.475	0.06849					66.6434	0.0817		84.099	0.08036														75.6602	0.08131					70.2848	0.0547		72.0188	0.10099
78.8392	0.0751		68.6086	0.06982		65.1406	0.08204		64.8516	0.08949		74.3886	0.08369					72.4812	0.08542		66.181	0.04906														66.6434	0.07495					63.1176	0.06977		65.5452	0.06345
57.7422	0.09279		80.8622	0.08087		74.7932	0.07208		79.8218	0.08099		68.493	0.08384					68.5508	0.06981		67.1058	0.0746														66.8746	0.06309					71.8454	0.06948		67.915	0.06951
71.1518	0.07563		69.1866	0.08123		69.649	0.06799		63.7534	0.07162		65.4874	0.0785					83.1164	0.10138		85.255	0.07594														62.424	0.05135					66.47	0.05491		63.8112	0.06452
61.0368	0.05283		75.4868	0.08293		71.3252	0.07981		80.2842	0.08072		68.204	0.07951					70.4004	0.07585		69.5912	0.07251														78.7814	0.05748					61.9616	0.04429		66.2966	0.05068
64.158	0.07104		76.007	0.08757		69.4178	0.07914		64.9672	0.08769		65.3718	0.09171					70.516	0.07026		69.3022	0.05321														66.2966	0.042					73.2904	0.07759		68.6086	0.06262
66.2966	0.06705		74.7354	0.07277		74.273	0.08468		67.5682	0.07441		66.8746	0.06226					72.9436	0.08315		72.3656	0.07983														67.337	0.08173					71.2096	0.0913		64.9672	0.079
63.8112	0.06009		85.8908	0.10044		80.7466	0.08695		59.0138	0.07275		67.1058	0.09138					74.562	0.09609		74.9088	0.05665																				69.1866	0.05376		77.0474	0.06723
73.117	0.07188		69.5334	0.07899					63.4644	0.08482		66.8746	0.0737					73.5216	0.08995		67.8572	0.07213																				68.0306	0.06388		66.9902	0.05305
73.0592	0.07813		75.8914	0.06977					65.314	0.06749		68.6664	0.07462					69.5912	0.08619		80.053	0.09361																				65.9498	0.06265		74.3308	0.07177
64.447	0.05425		74.0418	0.07976					71.2674	0.07903		72.3656	0.06938					65.2562	0.08728		76.8162	0.04896																				62.9442	0.06967		65.4874	0.05536
69.7646	0.08803		72.3078	0.08071					72.1344	0.07758		71.3252	0.0877					63.9268	0.07104		67.048	0.06435																				69.7068	0.06266		67.048	0.09143
65.7186	0.06756		76.8162	0.07477					74.9666	0.07957		72.1344	0.07129					69.36	0.07968		71.6142	0.07151																				66.47	0.07641		70.9784	0.0488
66.6434	0.07119		79.5906	0.08936					74.562	0.08588		66.9324	0.07133					67.3948	0.07482		68.3774	0.0697																				67.9728	0.07105		76.7584	0.07166
78.2034	0.07307		68.6664	0.08757					81.2668	0.09812		67.2792	0.08809					74.562	0.09195		73.0014	0.07531																				60.7478	0.05448		70.7472	0.07118
61.9038	0.06843		83.0586	0.08875					74.2152	0.09205		66.7012	0.08319					69.071	0.08939		73.984	0.06406																				78.319	0.05541		68.3196	0.06101
72.1344	0.08134		69.3022	0.06858					69.9958	0.09392		80.5154	0.09342					71.7876	0.077		70.227	0.07003																				66.6434	0.0638		66.0654	0.06613
69.1866	0.07241		69.4756	0.09517					68.2618	0.07644		64.3314	0.0783					71.383	0.08617		76.3538	0.06232																				63.5222	0.03858		66.47	0.06815
63.9268	0.0663		73.0592	0.08597					69.071	0.07233		70.1692	0.06846					59.9964	0.07823		74.4464	0.07179																				61.4414	0.0469		66.9902	0.07603
63.291	0.06581		67.2792	0.07934					66.7012	0.07734		65.314	0.08134					64.447	0.05579		76.7006	0.08353																				68.204	0.04189		68.4352	0.05733
67.4526	0.05735		74.3886	0.09061					71.4408	0.08894		69.5334	0.0907					72.7702	0.0689		79.5906	0.06643																				69.1866	0.05678		73.9262	0.0706
64.3892	0.05974		68.4352	0.07381					64.447	0.0698		76.4694	0.09398					78.319	0.08765		70.4582	0.06903																				67.1636	0.0397		64.5626	0.06597
76.9896	0.07655		77.6832	0.0907					71.4986	0.08063		75.4868	0.08265					70.3426	0.07638		67.8572	0.0479																				76.4116	0.08619		80.5154	0.07873
63.9268	0.05583		83.4632	0.09409					77.5098	0.1186		74.0418	0.08466					66.8746	0.07231		78.608	0.07241																				59.7652	0.06041		64.447	0.04444
67.2792	0.07673		69.071	0.07539					70.3426	0.07803		70.3426	0.06412					76.1804	0.0866		86.8156	0.09083																				66.5856	0.07584		67.9728	0.04059
67.6838	0.07296		73.406	0.07719					71.672	0.07677		72.7702	0.07756					70.0536	0.08073		72.4234	0.06619																				59.1872	0.05919		67.048	0.07176
73.3482	0.05789		77.5098	0.07561					67.1636	0.08519		69.938	0.07829					78.5502	0.06771		69.2444	0.0806																				67.5104	0.06213		77.8566	0.05572
80.92	0.0843		64.3892	0.06462					73.2904	0.09506		77.9722	0.08285					67.3948	0.07686		67.626	0.06384																				77.5676	0.06462		74.7932	0.05957
67.2214	0.09229		63.3488	0.06674					64.8516	0.05759		69.36	0.07866					62.8286	0.07705		63.002	0.05274																				70.2848	0.05036		68.204	0.08009
69.1288	0.06641		69.1288	0.08793					62.6552	0.07718		74.562	0.06954					70.9784	0.0772		62.7708	0.05974																				63.4644	0.06042		64.736	0.06255
73.9262	0.07446		69.5912	0.07146					70.1692	0.09832		72.3656	0.07587					74.2152	0.08652		66.5278	0.08277																				61.3258	0.05406		63.3488	0.05064
66.2388	0.07402		74.9088	0.07452					71.9032	0.08913		69.7646	0.06903					67.5104	0.09665		73.406	0.0678																				69.7068	0.05111		75.1978	0.07984
63.291	0.09075		66.5856	0.07659					73.6372	0.11513		70.8628	0.08487					76.874	0.08501		75.4868	0.06637																				71.094	0.07473		83.521	0.07407
67.5104	0.06906		88.3762	0.0845					65.1984	0.08597		78.897	0.09557					65.0828	0.07194		73.984	0.07285																				65.7186	0.07471		73.9262	0.05565
63.6378	0.06416		73.6372	0.06803					73.695	0.06848		64.9094	0.07397					61.7882	0.06702		72.828	0.05748																				61.7304	0.05828		73.5794	0.05958
67.6838	0.07145		68.8398	0.06874					65.1984	0.07729		71.3252	0.07026					64.6782	0.05896		70.6894	0.0678																				75.9492	0.07095		68.9554	0.06299
62.5396	0.0746		75.8336	0.0817					64.158	0.07544		70.5738	0.08814					71.961	0.06751		67.3948	0.0699																				72.8858	0.05458		77.8566	0.0843
70.8628	0.0618		72.3078	0.0718					71.4986	0.06798		76.585	0.09838					78.319	0.09192		79.5328	0.09038																				70.6894	0.08597		67.7416	0.10197
68.5508	0.07856		75.9492	0.08153					71.4408	0.07496		71.4986	0.07591					78.4924	0.08814		76.7584	0.06817																				65.7764	0.06901		76.3538	0.05521
73.8684	0.06749		70.1114	0.07265					75.7758	0.08455		76.2382	0.07939					71.4986	0.08368		64.736	0.05575																				71.6142	0.0638		59.7074	0.03817
64.1002	0.07651		79.8218	0.08226					67.337	0.07568		67.9728	0.08259					79.6484	0.07989		69.4178	0.05704																				76.8162	0.08336		78.03	0.07767
68.4352	0.07836		69.7646	0.10972					69.7646	0.07777		82.1338	0.09572					70.3426	0.07928		61.557	0.06492																				67.048	0.07849		63.6956	0.05242
69.4756	0.07436		84.4458	0.09406					63.291	0.06175		72.0188	0.08813					72.4234	0.06342		85.7174	0.07483																				69.2444	0.09049		66.759	0.06441
72.828	0.0648		78.4346	0.06873					78.7236	0.09386		80.053	0.08178					71.7298	0.0888		77.5098	0.07025																				68.493	0.08751		67.9728	0.0689
67.7416	0.07936		70.516	0.07876					74.5042	0.08762		63.4644	0.06554					70.6894	0.08274		75.9492	0.06432																				70.5738	0.07334		73.8106	0.07454
67.915	0.063		62.135	0.06676					56.4706	0.09247		64.7938	0.09026					62.4818	0.0571		68.204	0.05948																				73.0592	0.06247		83.9834	0.05401
65.4874	0.06269		74.9666	0.07421					73.4638	0.08941		71.2674	0.08847					72.4234	0.08501		66.8168	0.05845																				74.2152	0.09421		69.649	0.07384
61.557	0.07783		72.4234	0.08815					71.2674	0.08414		75.0244	0.08616					74.3886	0.08184		70.2848	0.05339																				65.0828	0.06915		71.3252	0.06082
73.8684	0.06527		80.4576	0.08268					69.5334	0.07016		85.8908	0.08761					64.6782	0.06785		77.1052	0.06155																				77.3942	0.07001		78.9548	0.06977
76.4116	0.0824		66.3544	0.07229					65.4296	0.09799		83.0586	0.0711					71.961	0.0899		67.4526	0.07343																				67.5104	0.04094		63.4066	0.05565
72.25	0.08141		66.3544	0.07044					63.1176	0.07185		72.0766	0.08098					76.9896	0.07679		74.1574	0.05218																				63.1176	0.07489		71.094	0.04776
62.424	0.06564		77.6254	0.0882					64.447	0.07365		78.5502	0.06919					62.713	0.07065		76.0648	0.07812																				67.3948	0.06066		70.4582	0.04868
63.869	0.06455		72.4234	0.08538					68.782	0.08701		67.626	0.08758					70.7472	0.08803		73.4638	0.05847																				67.1636	0.07887		69.7068	0.10052
79.6484	0.08057		70.9784	0.08027					63.291	0.08593		79.7062	0.07389					67.7994	0.08736		72.7702	0.09142																				66.4122	0.06385		76.1804	0.0669
64.9672	0.06269		72.828	0.0877					74.6198	0.07066		73.117	0.08849					65.7186	0.07455		69.3022	0.05474																				72.7702	0.06162		72.3078	0.0777
66.2388	0.08397		75.9492	0.08851					64.6782	0.08362		60.9212	0.07469					71.2096	0.06447		66.2966	0.06548																				64.5626	0.06506		64.6204	0.05138
68.6664	0.09185		67.626	0.08559					63.6378	0.06494		74.3308	0.15368					62.8864	0.08044		65.4874	0.06627																				75.718	0.08314		77.9144	0.09455
75.2556	0.07477		70.9206	0.10158					65.3718	0.08508		78.2612	0.09252					63.002	0.08863		70.7472	0.05179																				66.0076	0.06352		74.562	0.0565
67.9728	0.07227		72.4234	0.08071					71.383	0.07772		71.8454	0.07682					69.4756	0.08323		73.9262	0.07037																				69.2444	0.07195		71.4408	0.06367
69.7068	0.05561		74.7354	0.08562					67.9728	0.07153		69.1866	0.07589					73.4638	0.09568		68.493	0.06311																				67.6838	0.0777		67.2792	0.05736
74.7354	0.06976		63.9268	0.0619					69.4756	0.10568		78.6658	0.07982					67.337	0.07857		65.3718	0.0604																				66.5278	0.05664		73.9262	0.07486
63.2332	0.06918		73.7528	0.07548					76.4694	0.11153		77.6254	0.10308					61.3258	0.07282		72.539	0.06099																				72.828	0.08059		71.4408	0.05661
70.4582	0.06891		65.025	0.08193					65.025	0.06765		71.1518	0.08683					76.6428	0.07639		60.8056	0.05826																				69.8802	0.10217		69.8224	0.05587
69.649	0.0536		77.3942	0.07925					62.6552	0.07813		75.14	0.08768					72.1344	0.0858		72.3656	0.07645																				69.4178	0.07815		72.4812	0.09782
77.9144	0.07608		84.388	0.08761					67.3948	0.08347		75.8914	0.0801					71.2674	0.07534		68.8976	0.06445																				71.094	0.06671		66.1232	0.09182
68.4352	0.06606		75.4868	0.07033					68.493	0.08707		58.8982	0.06575					65.3718	0.08206		73.8684	0.06495																				66.759	0.06723		69.5912	0.07642
78.7814	0.07546		74.1574	0.08148					69.4178	0.08934		71.672	0.07384					66.4122	0.08004		68.7242	0.06851																				65.892	0.05858		64.5626	0.05845
71.4408	0.06849		70.6316	0.08235					68.6086	0.08444		70.516	0.08371					71.7876	0.09895		82.943	0.09326																				61.6148	0.06791		80.053	0.09152
75.4868	0.07174		69.8802	0.07305					66.8746	0.06583		70.9206	0.07568					64.158	0.08689		68.6086	0.06784																				64.9094	0.0658		61.3258	0.05198
64.5048	0.07698		67.7416	0.06822					65.7186	0.06895		74.9088	0.08603					74.0418	0.08541		69.649	0.05806																				66.1232	0.06679		86.8734	0.08593
64.3892	0.07407		84.1568	0.07647					77.1052	0.07972		74.7354	0.09495					69.7646	0.06521		76.7006	0.0719																				60.1698	0.04788		73.695	0.05012
69.36	0.06765		68.204	0.07628					68.5508	0.07221		69.3022	0.07955					64.6204	0.06985		80.8622	0.07953																				72.25	0.07544		72.1922	0.064
69.5334	0.0693		80.2264	0.07951					71.7876	0.07555		72.4812	0.07703					75.0822	0.08019		64.5626	0.05141																				70.4582	0.0759		71.2674	0.08499
65.025	0.07758		71.0362	0.09527					70.4004	0.08683		75.4868	0.08078					58.956	0.0622		76.5272	0.07321																				73.2904	0.07594		78.7814	0.06484
71.094	0.06166		78.03	0.0797					69.9958	0.08147		72.7702	0.07153					73.7528	0.06731		66.2966	0.05373																				71.672	0.06977		63.4066	0.09143
69.36	0.0614		73.0014	0.07449					72.7124	0.08374		69.7646	0.08211					69.5912	0.08347		69.1288	0.06728																				67.6838	0.06563		74.3886	0.06913
67.5104	0.07092		74.3308	0.0856					59.3028	0.07137		75.2556	0.0787					66.1232	0.07338		67.6838	0.05969																				69.8224	0.06279		63.8112	0.05602
69.8224	0.06663		73.7528	0.08041					64.6204	0.08151		71.7298	0.07021					62.4818	0.0749		66.181	0.06501																				57.1064	0.05172		67.5682	0.06542
63.6378	0.05897		64.9672	0.07259					73.8106	0.08671		78.897	0.08928					61.268	0.0795		76.7584	0.06385																				69.8224	0.08182		68.6664	0.05377
64.1002	0.04666		78.5502	0.08713					73.406	0.07888		71.8454	0.08129					68.9554	0.07721		68.0884	0.06473																				66.8168	0.07244		75.2556	0.0664
61.846	0.05309		85.0816	0.08902					65.4874	0.06777		71.6142	0.0698					80.7466	0.09922		72.0766	0.05742																				62.5974	0.07678		78.4346	0.06465
74.6776	0.07578		78.319	0.0778					61.9038	0.06751		67.5104	0.08157					69.071	0.08482		75.4868	0.05823																				63.3488	0.07781		76.1226	0.06603
60.401	0.06207		77.3942	0.08427					78.4924	0.07585		71.8454	0.07264					62.0772	0.08844		66.1232	0.06533																				76.3538	0.07046		67.1636	0.07086
62.0772	0.06401		82.3072	0.04663					68.493	0.08247		78.608	0.07021					69.5912	0.07683		64.3314	0.0615																				69.8224	0.06079		75.8336	0.07088
72.0188	0.06328		70.2848	0.0834					71.6142	0.08015		64.736	0.07597					77.1052	0.07991		67.8572	0.06693																				66.181	0.06172		68.204	0.08053
65.5452	0.07504		70.3426	0.08968					70.9206	0.0846		71.9032	0.07913					73.3482	0.06557		63.7534	0.05574																				67.5682	0.0575		71.9032	0.07799
66.9324	0.08498		83.1164	0.08806					77.5676	0.09001		65.3718	0.07131					63.1754	0.07474		69.8802	0.05479																				62.6552	0.06719		63.0598	0.05377
65.4874	0.05227		68.0884	0.07112					71.7876	0.07675		81.498	0.08517					61.3258	0.06357		65.603	0.05335																				72.9436	0.07891		68.3196	0.04922
72.539	0.07173		77.7988	0.08147					63.9846	0.07906		62.6552	0.07315					69.649	0.07848		77.0474	0.06975																				68.8976	0.07506		76.9318	0.07551
71.7298	0.08407		67.7416	0.06832					66.0076	0.0924		82.0182	0.08732					75.429	0.07563		77.452	0.0928																				68.3774	0.06399		72.1922	0.06387
60.1698	0.04113		71.2096	0.08445					63.6378	0.07313		71.7298	0.10256					69.7646	0.08113		66.2966	0.0637																				73.406	0.05735		67.4526	0.0753
69.8802	0.06674		69.4178	0.08828					65.6608	0.05407		76.007	0.07607					77.3942	0.12004		64.7938	0.0638																				67.5104	0.05835		65.892	0.05445
67.5104	0.06845		75.1978	0.09049					69.938	0.0712		70.9784	0.08619					68.6086	0.08603		70.1692	0.0542																				62.8864	0.06537		67.1058	0.04996
73.1748	0.08803		73.695	0.08874					66.2966	0.08089		66.181	0.08574					77.0474	0.07212		73.4638	0.06456																				66.7012	0.0579		75.14	0.06239
71.9032	0.06657		70.7472	0.08503					74.9666	0.06976		67.6838	0.08379					70.4004	0.08342		80.5154	0.07108																				55.7192	0.04612		75.2556	0.0823
65.8342	0.06076		72.1922	0.07283					70.6894	0.07261		72.828	0.08972					79.1282	0.08054		69.938	0.0726																				67.6838	0.0702		61.7304	0.05553
60.69	0.06777		79.1282	0.06927					68.5508	0.08773		77.6832	0.0884					77.3364	0.09266		66.3544	0.06188																				68.2618	0.07862		71.383	0.04792
67.915	0.05407		71.8454	0.08136					63.1754	0.09636		80.5154	0.09269					75.429	0.08121		72.25	0.06338																				68.8398	0.06872		63.3488	0.04954
65.0828	0.05578		77.3364	0.09171					74.2152	0.08559		70.516	0.08045					67.9728	0.0987		75.8336	0.06673																				62.424	0.08172		78.7236	0.05815
73.2904	0.06935		75.14	0.08497					65.4874	0.07247		71.094	0.08276					56.7596	0.05639		78.2612	0.08208																				63.6956	0.06126		76.7584	0.07039
62.8864	0.06175		70.1114	0.07527					61.4992	0.09209		81.6714	0.08115					66.9324	0.08209		69.071	0.05941																				72.828	0.0772		63.3488	0.06647
70.4582	0.0687		63.7534	0.0638					67.7416	0.08145		85.255	0.08285					70.3426	0.07119		79.764	0.07177																				67.8572	0.06343		71.2674	0.06053
77.1052	0.08102		71.0362	0.06926					63.7534	0.08173		76.4694	0.07311					67.4526	0.08372		75.3134	0.07617																				66.759	0.06916		67.3948	0.07107
65.6608	0.06384		75.7758	0.10562					59.0138	0.07887		62.4818	0.06269					76.1226	0.07807		69.8802	0.08122																				70.0536	0.07274		69.0132	0.07083
72.7124	0.0708		84.5036	0.09993					62.2506	0.07084		74.5042	0.07772					70.7472	0.09056		65.4296	0.05445																				71.672	0.063		70.6894	0.05389
76.6428	0.07232		68.3196	0.06862					63.5222	0.08		74.7932	0.09487					69.9958	0.08568		72.5968	0.06332																				65.1406	0.05014		67.7994	0.04343
64.447	0.05646		74.5042	0.09443					66.2966	0.09761		71.4408	0.07813					62.5974	0.07563		68.2618	0.06629																				74.851	0.05875		60.9212	0.05844
72.1344	0.08167		78.2034	0.07725					72.3656	0.08054		67.3948	0.08494					71.2096	0.08506		63.4066	0.05898																				71.5564	0.0741		70.4004	0.06021
73.1748	0.07349		79.7062	0.09482					77.6832	0.07599		68.0884	0.07972					70.6894	0.06453		71.2096	0.07268																				61.846	0.06881		74.7932	0.08679
63.291	0.08045		75.429	0.08436					72.3078	0.07305		71.9032	0.1004					73.9262	0.07972		77.9144	0.08172																				68.2618	0.06098		66.2966	0.05119
60.6322	0.06891		78.5502	0.07492					66.8168	0.07456		64.5626	0.08442					71.672	0.07767		69.9958	0.05138																				68.782	0.07398		71.2096	0.06789
74.7354	0.06112		75.1978	0.09152					73.0014	0.11437		74.5042	0.09141					68.6086	0.09337		67.6838	0.06242																				66.1232	0.09164		70.4004	0.09195
71.961	0.0613		81.9026	0.10045					65.892	0.08662		82.5384	0.09361					66.6434	0.08371		68.204	0.06303																				69.7646	0.06243		80.342	0.0894
72.3656	0.0672		74.3308	0.06695					77.5676	0.07981		73.3482	0.08437					70.227	0.07749		72.828	0.06533																				65.025	0.04234		65.8342	0.06405
77.3364	0.08226		73.5794	0.09387					70.0536	0.08368		70.227	0.07232					63.4644	0.0649		72.1922	0.06938																				68.204	0.07715		66.0076	0.04546
77.3364	0.06456		70.2848	0.07963					68.4352	0.08034		61.2102	0.05104					71.5564	0.08		73.5216	0.07096																				68.7242	0.05272		72.0188	0.06185
69.5912	0.05838		76.9318	0.08119					57.3376	0.07161		70.0536	0.07587					63.1176	0.07857		73.8106	0.06402																				66.5278	0.05813		66.759	0.05555
74.3308	0.08475		69.7068	0.07783					70.7472	0.1008		87.6826	0.09286					77.3364	0.07885		82.7696	0.07704																				73.0592	0.05588		76.9896	0.06784
68.3196	0.06557		67.6838	0.09149					68.3774	0.08821		70.1692	0.09061					69.7646	0.06423		68.493	0.07664																				64.9094	0.06235		71.5564	0.06044
75.4868	0.0758		69.3022	0.09848					66.181	0.08652		70.2848	0.07729					60.0542	0.06116		72.9436	0.06657																				64.3892	0.06735		75.429	0.09325
71.3252	0.06058		65.603	0.09769					66.2966	0.07283		69.071	0.07448					61.6148	0.07534		64.6204	0.06464																				70.9784	0.07191		75.0822	0.07098
70.2848	0.07617		82.365	0.10369					67.4526	0.08387		74.3308	0.07589					63.869	0.07001		72.7702	0.0793																				68.4352	0.06394		68.6664	0.07262
64.9672	0.07937		76.1226	0.0842					65.1406	0.08758		68.204	0.08415					74.5042	0.08879		71.672	0.0751																				73.695	0.06392		73.8684	0.07538
67.3948	0.07744		82.076	0.08355					67.5104	0.09803		71.0362	0.08828					67.9728	0.07702		70.0536	0.06704																				55.3724	0.04416		73.6372	0.05824
70.4582	0.06873		65.3718	0.08091					64.9672	0.07911		71.3252	0.08717					76.585	0.08544		77.741	0.07192																				63.58	0.04351		75.0244	0.06957
66.8746	0.06386		71.094	0.07421					67.4526	0.07053		68.6664	0.06885					71.8454	0.07208		68.6664	0.07919																				71.9032	0.05562		78.3768	0.08021
64.9672	0.06878		83.0586	0.07895					64.6782	0.07372		77.9144	0.07171					60.3432	0.08044		70.4004	0.0698																				67.1636	0.0563		78.2612	0.06292
66.759	0.07301		66.0076	0.06475					63.6378	0.08125		69.1288	0.07777					68.6086	0.08742		66.7012	0.06601																				71.094	0.08767		64.6204	0.06224
72.0766	0.06896		75.8914	0.10584					65.314	0.08655		69.5334	0.08181					66.181	0.07688		75.718	0.07138																				65.1406	0.06745		80.2842	0.07105
60.5744	0.07792		72.539	0.07513					65.9498	0.08514		73.7528	0.08642					69.7068	0.08679		65.892	0.05298																				72.0766	0.08332		75.8914	0.0578
65.603	0.06067		79.2438	0.08129					68.5508	0.08395		73.8106	0.09049					71.6142	0.09192		68.4352	0.04828																				67.9728	0.0862		66.8746	0.07254
68.6086	0.05382		75.1978	0.07438					67.337	0.06764		78.9548	0.08171					66.2388	0.09835		83.5788	0.07933																				74.1574	0.06641		68.3774	0.06212
71.094	0.06921		74.9666	0.08098					70.9784	0.08416		69.4756	0.06806					74.1574	0.0746		68.3774	0.06875																				75.3134	0.07491		78.2034	0.0726
73.7528	0.06511		73.984	0.09498					70.3426	0.08637		69.4178	0.08906					66.8746	0.08811		61.3836	0.06775																				71.7298	0.05755		79.0704	0.06074
70.9206	0.06938		69.5334	0.07397					58.1468	0.06465		68.6086	0.07598					62.2506	0.06637		68.3774	0.07309																				62.424	0.05244		78.1456	0.06858
76.9318	0.06627		70.227	0.0802					78.9548	0.08049		71.5564	0.08406					67.915	0.09215		67.626	0.06399																				74.9088	0.10036		67.4526	0.05933
67.626	0.08219		70.1692	0.09942					58.4358	0.06268		78.4924	0.08306					67.6838	0.07981		68.7242	0.06928																				64.2158	0.06995		58.0312	0.05236
69.4178	0.05609		79.0126	0.07435					75.6602	0.08156		66.1232	0.06556					70.1692	0.07341		71.4986	0.07243																				70.7472	0.07595		75.3712	0.05435
68.1462	0.07745		76.5272	0.08239					63.1754	0.07881		62.713	0.06219					60.1698	0.07133		65.4296	0.05265																				71.3252	0.10331		65.0828	0.07901
83.232	0.0764		68.204	0.07041					63.5222	0.07245		70.3426	0.08133					58.956	0.06912		73.0014	0.05148																				76.007	0.06924		65.2562	0.06789
71.383	0.0748		74.6776	0.08923					69.0132	0.07558		76.3538	0.08015					64.9672	0.07581		73.2904	0.06469																				73.8684	0.09142		76.2382	0.0733
64.5626	0.07532		69.2444	0.08142					71.2096	0.08057		82.0182	0.09121					76.4694	0.08059		72.0766	0.06504																				65.9498	0.06295		69.9958	0.05896
63.58	0.06597		77.1052	0.09345					67.7994	0.06855		76.6428	0.08325					73.2326	0.08115		64.6204	0.05961																				72.3078	0.0553		78.319	0.0684
74.6198	0.06559		76.585	0.07324					64.736	0.06657		67.1636	0.07013					64.1002	0.07714		84.2146	0.07781																				67.626	0.06071		74.5042	0.05948
66.8746	0.08857		75.9492	0.09714					62.8864	0.10848		80.8622	0.08087					73.4638	0.07781		68.0306	0.07183																				69.4178	0.0907		60.8634	0.0572
76.4116	0.07174		69.7068	0.07864					61.0946	0.05088		71.9032	0.06104					64.158	0.05673		67.1636	0.064																				71.7876	0.08265		75.8336	0.06884
61.9038	0.06111		62.8286	0.06131					59.7652	0.06181		76.9896	0.07249					79.1282	0.08135		78.897	0.0602																				66.5278	0.06932		59.1294	0.06165
74.1574	0.08295		67.5682	0.07732					63.6378	0.0778		65.7186	0.08706					68.6086	0.06622		66.6434	0.06412																				65.4874	0.05307		76.4116	0.0628
67.5104	0.08447		69.1866	0.06895					65.7186	0.0816		69.7068	0.08748					74.3308	0.07327		73.1748	0.06604																				75.8336	0.07038		69.071	0.05576
69.8224	0.07213		74.9088	0.08427					60.8056	0.06143		74.1574	0.08279					67.915	0.07809		71.2674	0.06674																				76.1804	0.07555		66.1232	0.06561
64.5048	0.06726		78.1456	0.07256					62.713	0.07972		71.2096	0.08333					57.0486	0.0586		65.7186	0.06908																				62.9442	0.05222		77.9722	0.07687
63.58	0.06478		74.0996	0.08539					64.5048	0.07464		69.938	0.07423					69.8802	0.0674		70.5738	0.06372																				67.1058	0.06149		74.9088	0.05738
69.5334	0.07114		82.8852	0.0951					60.8634	0.0753		64.7938	0.09015					70.227	0.07247		72.4812	0.07566																				72.9436	0.06433		72.1922	0.06677
71.8454	0.06826		83.3476	0.08642					62.3662	0.07861		66.2388	0.06629					81.2668	0.0827		70.4004	0.06538																				79.8218	0.08788
67.5104	0.06386		64.6782	0.07498					66.47	0.08727		85.0816	0.08288					61.4414	0.07182		68.8398	0.06904																				65.6608	0.05263
77.5098	0.07151		64.7938	0.06824					68.204	0.07496		76.5272	0.07838					65.7186	0.0789		71.1518	0.06823																				68.782	0.07565
62.713	0.0539		77.6832	0.09067					69.4756	0.08277		62.9442	0.07312					71.0362	0.0669		65.1406	0.05875																				75.6024	0.06807
74.6198	0.05822		71.4986	0.07093					62.6552	0.07025		60.9212	0.08143					75.2556	0.08867		73.5216	0.07035																				59.823	0.06119
66.8746	0.07479		63.9268	0.08029					67.2792	0.07793		73.1748	0.08296					73.2904	0.08065		68.9554	0.06276																				68.8398	0.06571
67.337	0.06443		78.2034	0.08097					64.2158	0.06567		80.1108	0.07315					72.1344	0.08121		70.1114	0.07077																				66.5856	0.08868
66.7012	0.07037		77.741	0.07977					71.7298	0.09378		74.0996	0.07102					61.846	0.07723		63.869	0.08366																				67.1058	0.06135
75.1978	0.07343		76.3538	0.06645					63.002	0.08261		71.4408	0.08656					61.0946	0.07858		67.626	0.05961																				65.3718	0.07448
76.9896	0.08026		71.2096	0.07987					70.3426	0.08835		66.5856	0.07917					76.007	0.07419		61.4992	0.05951																				69.8224	0.05593
79.3016	0.07363		73.8684	0.09505					66.0076	0.08481		67.4526	0.07255					80.3998	0.09469		73.984	0.07985																				71.2674	0.0653
66.8746	0.05974		72.6546	0.07626					66.7012	0.07997		81.2668	0.0825					66.0076	0.07092		74.6776	0.06793																				70.8628	0.06733
74.273	0.0775		86.7	0.10957					69.649	0.09394		61.2102	0.05952					65.9498	0.08606		69.4756	0.06659																				67.4526	0.0633
71.7876	0.06645		77.163	0.0904					71.672	0.10362		66.6434	0.09355					70.8628	0.07166		78.9548	0.06314																				73.1748	0.06241
65.9498	0.0742		67.6838	0.07294					66.47	0.05654		79.7062	0.09389					60.8634	0.06333		76.7006	0.07654																				64.3892	0.08275
70.805	0.0705		67.6838	0.09268					72.4234	0.06767		73.0592	0.06758					70.4004	0.07096		65.7186	0.05478																				68.3774	0.06638
72.0188	0.07212		79.7062	0.08247					72.5968	0.07864		59.3028	0.05817					68.4352	0.08174		70.7472	0.06575																				77.2786	0.10052
82.2494	0.09285		78.608	0.07608					67.2792	0.07784		60.9212	0.07088					70.227	0.06815		70.3426	0.07228																				75.7758	0.06028
71.1518	0.08097		71.5564	0.06695					63.58	0.07906		66.759	0.05099					64.5048	0.07877		71.1518	0.06198																				64.2158	0.06832
71.9032	0.07931		70.1114	0.08554					64.9094	0.07816		77.163	0.09154					67.048	0.05804		70.1114	0.05251																				76.4694	0.06921
74.3886	0.08208		71.9032	0.07755					70.9206	0.07431		67.7416	0.07227					76.1226	0.06572		74.4464	0.07776																				78.4924	0.07049
67.2214	0.06193		73.117	0.07805					67.626	0.08025		67.1058	0.06857					76.8162	0.07341		71.2096	0.07252																				70.1114	0.06413
71.5564	0.06133		76.5272	0.06231					62.5974	0.08016		78.3768	0.07138					69.649	0.05974		68.782	0.07084																				69.4756	0.05579
73.6372	0.06973		70.5738	0.08707					73.0592	0.08484		72.828	0.08499					70.6894	0.05849		71.4986	0.05513																				85.3706	0.08921
68.3774	0.07081		69.7646	0.0761					75.7758	0.08636		72.4812	0.08578					76.0648	0.07611		58.956	0.04349																				74.851	0.0629
70.6316	0.08204		69.4178	0.07042					71.7298	0.08446		64.5626	0.07415					72.1344	0.05809		61.7882	0.05987																				82.654	0.09318
74.2152	0.09462		65.892	0.06245					62.8286	0.0813		73.117	0.06995					71.9032	0.07422		65.9498	0.06771																				68.2618	0.08201
65.6608	0.07678		73.6372	0.07105					65.025	0.0865		71.383	0.0824					75.4868	0.07225		63.0598	0.0633																				70.9784	0.0578
67.626	0.04719		82.7696	0.09256					65.314	0.07968		75.8914	0.07856					76.1226	0.07502		83.3476	0.08787																				71.7298	0.05924
68.5508	0.05443		83.81	0.09007					69.4756	0.06759		67.9728	0.07083					71.7876	0.06915		76.0648	0.0818																				65.1406	0.08775
62.3662	0.05871		64.5626	0.06783					75.7758	0.08553		66.0076	0.09					73.9262	0.05486		68.493	0.07366																				71.961	0.06542
69.2444	0.10266		75.6024	0.07887					64.2736	0.07513		77.741	0.09222					70.6316	0.08041		69.0132	0.07569																				67.2792	0.05669
67.5682	0.0871		77.6832	0.08073					71.4408	0.08471		80.2842	0.09996					75.1978	0.06491		63.1176	0.06796																				76.8162	0.07006
73.6372	0.07505		73.5794	0.07141					67.1636	0.05918		73.406	0.06506					73.984	0.07832		73.2326	0.05976																				69.7646	0.05373
67.1058	0.0593		74.1574	0.07431					61.268	0.07931		78.319	0.08084					74.3308	0.06865		66.0654	0.05611																				80.1686	0.08024
72.539	0.06853		71.4986	0.06519					62.0772	0.05626		67.2214	0.07595					71.6142	0.08475		70.3426	0.07404																				66.9902	0.06503
73.8684	0.06772		71.6142	0.07683					66.5278	0.06832		71.5564	0.09955					71.8454	0.08934		72.828	0.0669																				64.3892	0.06747
67.5682	0.07245		69.7646	0.06878					66.759	0.07592		73.984	0.07515					73.0014	0.06062		67.2792	0.06324																				69.1288	0.0579
71.9032	0.06725		80.3998	0.0983					70.9784	0.09364		77.2208	0.08289					72.5968	0.07739		83.6944	0.07433																				70.7472	0.06036
66.759	0.07666		75.6024	0.07353					64.9672	0.09134		70.2848	0.09172					66.9324	0.05691		78.608	0.07189																				62.8286	0.04733
69.1288	0.06589		66.8746	0.07751					68.782	0.08164		68.0306	0.06941					68.8976	0.07126		68.6664	0.07018																				76.6428	0.06664
68.0306	0.07275		75.8914	0.09401					71.672	0.06899		67.8572	0.06764					73.6372	0.08089		66.181	0.06506																				64.9672	0.04895
70.227	0.06992		73.8684	0.07666					79.3016	0.08463		80.2264	0.08233					72.0188	0.08172		74.7932	0.06682																				72.0766	0.10241
69.5912	0.073		67.2214	0.07154					73.8106	0.09877		71.0362	0.08033					76.296	0.08126		70.3426	0.06435																				70.7472	0.07475
76.1804	0.07915		78.2612	0.06541					72.5968	0.06698		74.7932	0.09168					77.5676	0.11541		66.2388	0.06476																				78.2034	0.08097
72.3078	0.06276		73.695	0.07879					69.0132	0.08722		69.4178	0.07714					72.3078	0.0538		74.7354	0.075																				64.0424	0.05543
71.094	0.07041		76.7006	0.07458					68.2618	0.07207		71.1518	0.07961					72.539	0.08788		65.7764	0.05955																				63.6956	0.07881
73.0014	0.06793		68.9554	0.06849					71.6142	0.06582		72.1344	0.07815					74.0418	0.08869		76.8162	0.06554																				76.0648	0.04504
70.4582	0.06792		82.5384	0.1028					71.7298	0.0842		75.6602	0.09215					74.3886	0.07065		64.6782	0.06178																				68.3774	0.06441
68.7242	0.06988		81.0934	0.09676					69.3022	0.06841		76.007	0.08034					73.4638	0.06954		81.9026	0.09142																				65.892	0.07263
74.851	0.06821		64.3892	0.08672					68.8398	0.07519		74.9666	0.08039					72.3656	0.07487		69.1866	0.05819																				75.2556	0.06359
72.828	0.07371		64.447	0.07933					74.9666	0.06536		63.1754	0.06683					72.25	0.06822		74.0996	0.07802																				63.9846	0.06461
68.0884	0.05997		77.9722	0.09166					75.14	0.0779		79.7062	0.0907					73.0592	0.07327		69.9958	0.07644																				67.2792	0.06319
68.6664	0.0778		76.2382	0.10642					75.718	0.0753		79.7062	0.07578					74.851	0.08086		79.4172	0.07665																				74.5042	0.05776
69.5912	0.0694		76.4116	0.08574					62.3084	0.0856		74.273	0.07703					69.071	0.06408		80.8622	0.06823																				69.7646	0.06544
80.8622	0.08282		61.0368	0.06695					64.5626	0.06866		70.4582	0.08023					70.5738	0.06898		63.6956	0.0682																				63.3488	0.06124
68.0306	0.074		68.204	0.07797					60.979	0.0755		74.0418	0.09005					71.383	0.07084		57.9156	0.04245																				60.6322	0.05578
66.9324	0.06547		67.3948	0.09096					74.3308	0.10411		67.2792	0.07784					68.5508	0.06862		71.9032	0.07112																				66.2966	0.07654
70.4582	0.06862		67.915	0.07837					72.539	0.0766		70.6316	0.08489					75.0822	0.06564		70.805	0.07779																				73.8106	0.09002
66.9324	0.05176		79.6484	0.08286					72.539	0.08891		67.1058	0.07891					71.8454	0.0717		70.9784	0.07638																				77.741	0.07804
69.1288	0.06267		68.6086	0.08917					71.3252	0.0818		67.7994	0.08484					76.1226	0.06768		63.4066	0.05109																				68.0884	0.06116
78.3768	0.08357		73.8684	0.07312					72.1344	0.09621		75.2556	0.08873					66.3544	0.06495		67.5104	0.06705																				70.4582	0.06406
71.3252	0.06354		78.6658	0.0879					72.8858	0.08873		64.9094	0.06966					71.7298	0.06786		81.787	0.05765																				65.3718	0.06318
70.2848	0.07378		73.0592	0.09746					65.7764	0.06729		71.3252	0.0866					75.8914	0.06801		65.1984	0.05565																				74.3308	0.07254
64.158	0.06545		74.3308	0.08508					66.9902	0.07893		69.8224	0.08123					69.5334	0.06669		67.2214	0.06717																				75.2556	0.09414
79.475	0.06859		67.2792	0.07716					75.6602	0.06222		73.4638	0.08201					76.4694	0.06852		67.8572	0.06341																				69.8224	0.07727
70.516	0.05349		70.3426	0.07653					68.8398	0.07968		66.9324	0.08458					66.5278	0.05925		80.9778	0.07263																				58.7826	0.05847
62.7708	0.0763		67.5104	0.07877					71.1518	0.07158		70.1692	0.06254					74.5042	0.06465		75.8336	0.0777																				66.759	0.07647
59.1872	0.04925		71.3252	0.06423					68.9554	0.05871		68.6664	0.06492					76.5272	0.07507		79.2438	0.07556																				70.9206	0.07725
66.47	0.06273		65.1984	0.0821					73.0014	0.07442		79.9374	0.0916					73.695	0.05595		73.8684	0.06937																				70.0536	0.069
67.4526	0.06365		69.2444	0.07751					64.3892	0.08093		70.516	0.06311					70.805	0.07509		71.7876	0.06246																				69.649	0.0505
75.0244	0.08195		66.9902	0.08011					67.5682	0.0858		70.6316	0.07093					65.1984	0.06467		76.7006	0.0816																				68.9554	0.06101
73.406	0.06703		68.4352	0.06613					71.383	0.07087		82.3072	0.09214					75.6024	0.06772		72.4234	0.07198																				64.0424	0.06606
69.1288	0.06861		75.0244	0.08523					69.8802	0.08325		75.3134	0.07944					66.7012	0.07057		75.1978	0.06708																				73.4638	0.07165
71.7876	0.08044		77.1052	0.08108					68.204	0.07		64.5048	0.08209					74.273	0.06179		84.0412	0.0711																				68.8398	0.05196
66.9902	0.06423		70.1114	0.06866					69.7068	0.08201		66.0654	0.07234					70.5738	0.07172		74.5042	0.07922																				72.3656	0.05806
69.1866	0.07065		85.833	0.07571					73.6372	0.0686		72.1344	0.07524					69.5334	0.0793		82.7118	0.05967																				72.828	0.06437
64.1002	0.06312		70.9206	0.07512					65.7764	0.09979		66.2966	0.06792					65.1406	0.05123		64.736	0.06503																				64.9672	0.05829
64.0424	0.04764		79.764	0.09722					72.6546	0.08256		81.2668	0.0856					80.1686	0.05644		79.186	0.07183																				69.7646	0.07376
75.429	0.07831		71.961	0.08021					68.8976	0.08172		69.5334	0.07255					72.7124	0.06173		81.0356	0.0663																				71.383	0.06369
73.406	0.08402		66.181	0.0892					73.7528	0.07567		76.874	0.08663					75.2556	0.07277		81.787	0.0743																				68.8976	0.06962
68.493	0.07036		66.181	0.07549					68.4352	0.06643		80.053	0.09357					69.938	0.08134		73.0014	0.06727																				75.3712	0.05538
73.0014	0.06388		73.5216	0.07838					77.3942	0.09989		69.9958	0.0776					72.4234	0.06397		62.0772	0.05483																				64.2736	0.05389
71.8454	0.06299		64.7938	0.07514					67.2792	0.07987		77.5676	0.07429					68.782	0.07009		73.5216	0.03779																				66.3544	0.0663
62.1928	0.07622		69.9958	0.07357					68.204	0.086		85.6018	0.06981					71.6142	0.06717		74.0418	0.06868																				73.6372	0.07752
70.1114	0.07629		75.1978	0.07626					65.892	0.0634		72.0766	0.08239					70.3426	0.07669		67.337	0.0551																				74.9666	0.04615
72.4234	0.08429		75.1978	0.08043					73.984	0.07439		74.6198	0.09235					78.0878	0.08086		78.3768	0.08353																				66.2966	0.0462
65.603	0.07179		82.2494	0.09197					72.3078	0.0733		67.7994	0.07848					75.7758	0.07767		71.672	0.06278																				73.117	0.06976
66.5278	0.07147		73.0592	0.07328					68.7242	0.08236		73.9262	0.0665					72.8858	0.06498		69.0132	0.06182																				81.4402	0.07625
66.5856	0.07138		74.0996	0.0816					60.5166	0.06886		65.892	0.074								72.1922	0.06723																				78.0878	0.07192
69.7068	0.07082		76.296	0.10228					66.7012	0.08016		76.585	0.08713								66.9324	0.05836																				68.0306	0.07642
67.7994	0.10949		74.6776	0.07797					66.0076	0.06919		69.5912	0.06295								75.9492	0.06938																				72.1922	0.06751
73.0014	0.06615		82.1338	0.0938					71.7298	0.11528		72.539	0.07423								76.1226	0.06288																				76.874	0.05331
73.4638	0.08213		75.0244	0.08587					71.8454	0.08096		66.47	0.07997								63.9846	0.0528																				73.0592	0.06253
70.7472	0.0638		72.1344	0.06027					69.7068	0.08036		74.9088	0.08566								73.0592	0.05517																				77.5676	0.06991
62.8286	0.06554		67.1058	0.07661					62.6552	0.07829		69.7646	0.06578								65.9498	0.0692																				66.5856	0.07987
64.0424	0.06698		71.383	0.07194					63.5222	0.09628		85.544	0.07891								75.429	0.07033																				65.4874	0.05918
75.3134	0.08488		79.5328	0.0736					60.5744	0.06268		71.383	0.08125								79.3594	0.07121																				77.6832	0.06033
65.1984	0.06535		84.966	0.09171					67.5104	0.08162		69.3022	0.06691								66.3544	0.07299																				63.002	0.06303
72.8858	0.07224		71.1518	0.08236					64.0424	0.09492		65.5452	0.06803								72.0188	0.06457																				65.8342	0.06281
66.0076	0.06358		67.5104	0.07356					66.2966	0.0534		68.4352	0.06624								77.5676	0.07433																				79.7062	0.05825
67.6838	0.07826		75.8336	0.07644					69.8224	0.10352		72.3078	0.06729								64.3314	0.05905																				71.2096	0.06959
64.7938	0.06519		78.897	0.09114					73.695	0.08947		68.7242	0.07154																													73.3482	0.07834
72.7702	0.0739		68.7242	0.0658					69.36	0.07844		67.1058	0.08428																													64.6204	0.0655
66.5278	0.06508		76.2382	0.07364					67.7994	0.08312		64.1002	0.06481																													65.7186	0.07299
61.1524	0.06405		72.25	0.08765					65.8342	0.06923		71.9032	0.08032																													72.828	0.06098
66.759	0.06629		72.9436	0.07942					73.406	0.09092		69.938	0.07468																													64.3892	0.07545
69.1866	0.08788		71.672	0.07443					66.8746	0.06885		66.9902	0.07133																													61.268	0.05762
59.3028	0.07737		72.6546	0.0599					67.048	0.08385		68.1462	0.0687																													70.1114	0.07532
71.094	0.0723		70.7472	0.0973					59.1872	0.07444		79.186	0.07993																													65.8342	0.07123
73.117	0.0798		72.3078	0.08195					62.0772	0.08574		70.5738	0.06164																													65.1984	0.06405
73.3482	0.08054		66.0654	0.06248					70.3426	0.07829		72.1344	0.08536																													67.915	0.07662
68.0306	0.08413		70.0536	0.07918					65.9498	0.08799		62.3662	0.06735																													58.8982	0.06991
69.1288	0.07004		72.6546	0.0846					75.14	0.09232		71.4408	0.07988																													70.9206	0.05043
75.2556	0.07323		69.9958	0.07686					69.4178	0.0819		74.9088	0.08838																													66.5856	0.06456
68.8398	0.07169		64.8516	0.06695					75.0822	0.06888		64.6782	0.08941																													72.828	0.04276
64.6204	0.08027		83.3476	0.08341					66.8746	0.07034		71.2674	0.09461																													70.3426	0.06925
66.5856	0.06467		75.7758	0.07257					65.9498	0.07689		85.544	0.08263																													68.7242	0.09855
63.6956	0.06725		79.0704	0.07528					68.3774	0.072		64.3892	0.08192																													69.4178	0.06165
68.0884	0.07301		66.9902	0.09081					67.5682	0.08021		83.0008	0.09448																													75.0244	0.07486
73.5794	0.0705		70.227	0.07872					70.6316	0.07688		73.8106	0.09581																													72.8858	0.0734
81.8448	0.08805		77.1052	0.07891					69.8802	0.07928		75.8336	0.07785																													66.0076	0.06436
68.9554	0.07277		75.8336	0.08839					69.1866	0.0789		79.5906	0.09527																													70.6894	0.08197
			70.4004	0.07085					66.0654	0.07891		73.0014	0.06993																													66.0654	0.07157
			62.6552	0.07973					62.6552	0.08313		71.7298	0.085																													63.3488	0.06127
			70.8628	0.07863					61.7882	0.07104		74.9666	0.0915																													66.2966	0.06449
			70.9784	0.0701					65.603	0.077		61.6726	0.06228																													75.0244	0.06582
			75.718	0.08118					65.3718	0.06568		71.2096	0.08988																													67.915	0.05178
			79.475	0.10459					64.3314	0.07264		81.9026	0.09568																													65.603	0.07361
			77.2786	0.08883					70.4582	0.06063		74.4464	0.07474																													63.869	0.06187
			64.7938	0.06786					65.1984	0.06454		70.6316	0.08755																													64.3314	0.07407
			76.0648	0.07482					76.7006	0.076		65.7186	0.05875																													62.2506	0.06926
			73.3482	0.08624					69.7068	0.06854		78.4924	0.07058																													65.7186	0.06473
			75.6024	0.07878					59.534	0.07014		73.406	0.09016																													68.2618	0.05667
			68.7242	0.06932					60.4588	0.063		72.9436	0.07601																													63.58	0.0758
			75.718	0.07994					66.5856	0.08665		77.6832	0.07685																													66.47	0.0868
			74.6776	0.08003					77.5676	0.07763		76.2382	0.07747																													65.1406	0.04945
			68.0306	0.07599					74.7354	0.07619		75.3712	0.07634																													71.2096	0.06474
			76.7006	0.09545					66.181	0.08984		69.1288	0.06672																													63.8112	0.05341
			67.6838	0.09213					64.9672	0.08177		69.649	0.08686																													74.7932	0.05956
			78.5502	0.08329					67.4526	0.08307		73.5794	0.06707																													60.2854	0.06428
			80.8622	0.07801					66.5278	0.08136		76.6428	0.08234																													72.828	0.06585
			71.4986	0.07167					68.2618	0.08433		76.3538	0.08427																													68.0884	0.05088
			74.3886	0.07527					66.6434	0.05911		76.0648	0.06821																													75.6602	0.06438
			73.406	0.08715					69.4756	0.07768		77.452	0.07954																													70.6894	0.07595
			69.3022	0.06877					65.025	0.09174		74.5042	0.08256																													69.5334	0.07012
			73.117	0.0926					70.0536	0.08028		81.9604	0.06953																													69.1288	0.06069
			65.603	0.07841					67.9728	0.07316		75.6602	0.09609																													62.2506	0.07538
			68.4352	0.07538					65.7186	0.07983		80.5154	0.0848																													70.6316	0.08018
			71.5564	0.07717					60.5744	0.06309		81.7292	0.097																													70.7472	0.07258
			65.4874	0.11089					64.9672	0.09976		83.3476	0.07708																													72.6546	0.08151
			63.1176	0.07333					72.25	0.08704		69.36	0.07513																													70.9206	0.0665
			80.1108	0.0793					69.071	0.07958		76.007	0.09885																													76.0648	0.04881
			63.291	0.06271					69.938	0.07493		76.1804	0.08534																													74.0418	0.07081
			69.9958	0.06997					61.7882	0.07365		65.6608	0.07966																													70.8628	0.07213
			69.9958	0.0841					78.2034	0.07814		73.695	0.09202																													60.6322	0.04521
			77.1052	0.06931					77.5676	0.0855		66.4122	0.06907																													70.0536	0.07491
			65.892	0.07306					75.0822	0.07748		67.7994	0.0814																													65.5452	0.06895
			65.892	0.07915					62.9442	0.09374		72.5968	0.07813																													68.8976	0.07431
			73.2326	0.09572					65.7186	0.0656		82.4806	0.07913																													63.1754	0.07504
			67.048	0.07461					66.9324	0.08192		71.4408	0.07712																													64.6204	0.06246
			69.1288	0.08874					63.58	0.07985		78.7236	0.07291																													77.2786	0.074
			82.943	0.09097					60.9212	0.07068		72.828	0.06669																													61.3258	0.07581
			79.6484	0.08021					68.0884	0.08105																																70.4582	0.07084
			73.3482	0.08206					67.3948	0.0722																																71.1518	0.07918
			61.7882	0.05866					62.2506	0.0682																																68.0884	0.05001
			70.3426	0.07989					71.672	0.08161																																70.9784	0.06005
			71.3252	0.08755					66.0654	0.10536																																68.5508	0.06428
			73.4638	0.0971					64.2736	0.07819																																64.736	0.06619
			71.7876	0.07583					64.2158	0.07506																																68.3196	0.05469
			69.071	0.0716					70.3426	0.08693																																68.5508	0.06464
			78.4346	0.09266					64.736	0.0771																																66.1232	0.07564
			78.4346	0.08121					63.5222	0.07772																																68.782	0.09696
			63.869	0.06757					71.7298	0.08174																																70.9784	0.059
			75.9492	0.08388					73.1748	0.11211																																70.4582	0.05498
			73.984	0.08518					59.4184	0.07777																																70.516	0.07334
			67.7994	0.07508					66.1232	0.09594																																65.9498	0.08219
			75.6024	0.08756					63.9268	0.06941																																66.9902	0.06967
			78.319	0.09078					72.3078	0.07808																																70.4582	0.06712
			77.6832	0.10321					67.048	0.08169																																71.0362	0.07712
			69.2444	0.08554					66.3544	0.07881																																72.7702	0.06404
			79.764	0.09503					63.0598	0.06677																																63.58	0.0809
									70.9206	0.08187																																68.4352	0.04725
									73.6372	0.08375																																66.3544	0.07671
									63.5222	0.06934																																68.493	0.06725
									74.9666	0.07055																																68.8398	0.06897
									62.3662	0.07062																																70.4582	0.0536
									60.6322	0.06139																																58.8982	0.06632
									75.429	0.06885																																75.2556	0.06519
									63.7534	0.06967																																73.2904	0.07662
									65.9498	0.06802																																73.0592	0.07907
									67.5104	0.07901																																74.6198	0.05764
									64.9672	0.09282																																71.4986	0.06642
									68.8398	0.08434																																71.5564	0.07656
									71.4986	0.07699																																71.1518	0.07667
									75.718	0.08343																																66.8168	0.07588
									66.47	0.07002																																76.3538	0.06946
									65.7186	0.0889																																71.383	0.07541
									70.516	0.09918																																66.3544	0.06285
									74.0418	0.08588																																62.8864	0.08006
									66.9902	0.08739																																66.7012	0.06808
									74.273	0.07141																																71.4408	0.07101
									64.8516	0.0767																																71.4986	0.06077
									70.805	0.07601																																73.2326	0.09475
									72.25	0.07017																																66.0076	0.06185
									66.47	0.08752																																73.0592	0.06086
									66.1232	0.07505																																70.805	0.06669
									68.3196	0.07713																																59.0716	0.04868
									68.3774	0.0876																																74.0418	0.05541
									75.3134	0.08824																																68.6086	0.06889
									63.002	0.07184																																70.227	0.06885
									66.3544	0.08428																																61.9038	0.07459
									75.4868	0.06786																																62.1928	0.06062
									69.8802	0.07115																																61.268	0.07725
									60.0542	0.0756																																75.3134	0.06634
									59.823	0.08422																																69.938	0.05886
									65.7186	0.07465																																69.938	0.05762
									73.2904	0.08524																																73.406	0.05173
									62.4818	0.06762																																74.562	0.06169
									76.874	0.08199																																72.4812	0.07962
									66.181	0.0719																																66.2388	0.08278
									70.5738	0.07318																																67.1058	0.06838
									67.626	0.07928																																65.3718	0.05708
									64.0424	0.07464																																75.3134	0.05647
									58.956	0.06892																																66.2966	0.07223
									59.6496	0.08266																																68.1462	0.07841
									62.424	0.06247																																65.2562	0.06563
									76.1804	0.1067																																68.4352	0.0768
									65.6608	0.07647																																71.094	0.05904
									66.5278	0.05857																																65.3718	0.06708
									63.8112	0.07693																																65.1984	0.06506
									57.4532	0.0563																																75.6602	0.07813
									82.365	0.07146																																70.1114	0.06942
									61.6726	0.06804																																62.7708	0.09171
									67.8572	0.08254																																73.4638	0.07172
									70.7472	0.06661																																63.0598	0.07691
									62.7708	0.0756																																66.8168	0.05468
									67.4526	0.09113																																66.1232	0.066
									72.539	0.0657																																62.8864	0.053
									63.2332	0.08775																																69.0132	0.04897
									75.6024	0.07765																																72.7702	0.06413
									64.2736	0.07161																																68.4352	0.0528
									66.5856	0.07213																																68.8976	0.09054
									62.0772	0.06891																																66.5278	0.06699
									72.0188	0.09725																																62.5974	0.06189
									64.9094	0.07754																																73.7528	0.07232
									61.2102	0.09508																																63.2332	0.05773
									64.6782	0.07814																																65.0828	0.06937
									73.3482	0.07263																																66.0076	0.06903
									73.8106	0.09212																																68.204	0.07402
									71.2096	0.07354																																75.8336	0.07361
									58.956	0.07365																																61.268	0.05282
									70.1692	0.08153																																71.4986	0.05353
									72.7702	0.08362																																66.181	0.07309
									67.626	0.08178																																70.7472	0.06706
									68.0884	0.07474																																77.9722	0.07029
									73.984	0.08039																																66.7012	0.05944
									71.7876	0.08737																																63.0598	0.08456
									68.204	0.06524																																66.5856	0.06531
									75.2556	0.055																																67.337	0.07029
									68.2618	0.08026																																80.5154	0.09149
									71.4986	0.08763																																69.4756	0.07246
									60.2854	0.0774																																69.36	0.04952
									68.6086	0.07671																																69.0132	0.06412
									63.3488	0.07619																																67.048	0.08409
									63.6378	0.0632																																64.9094	0.05928
									61.2102	0.07856																																69.938	0.06105
									72.4234	0.08427																																72.0188	0.06432
									60.5166	0.07476																																65.892	0.06172
									78.319	0.10341																																70.516	0.052
									76.7584	0.08122																																67.7416	0.08485
									68.1462	0.07933																																76.7584	0.07551
									73.117	0.08618																																66.5856	0.0649
									73.5794	0.07831																																74.5042	0.06019
									74.7932	0.07823																																75.0822	0.09433
									75.2556	0.09006																																76.7584	0.05236
									71.7298	0.06516																																72.3656	0.07684
									71.2674	0.0885																																66.1232	0.08358
									60.112	0.07085																																65.1984	0.0741
									67.048	0.07926																																68.8398	0.05974
									67.2214	0.0848																																82.8274	0.09269
									69.7068	0.09163																																68.6664	0.04624
									67.626	0.12256																																70.1692	0.05129
									76.2382	0.08606																																70.5738	0.08544
									66.5856	0.09108																																71.672	0.09471
									66.5856	0.0635																																66.5856	0.06553
									62.3084	0.06749																																66.4122	0.07553
									70.4582	0.09184																																64.6782	0.06427
									72.3656	0.07251																																70.0536	0.06334
									58.5514	0.0652																																66.2966	0.02922
									73.2904	0.07498																																79.186	0.07734
									64.3314	0.08045																																65.0828	0.0547
									70.4004	0.10714																																67.6838	0.09582
									76.8162	0.07218																																65.1984	0.0626
									65.892	0.07284																																75.6602	0.07379
									67.915	0.09157																																70.3426	0.11
									66.8168	0.07477																																69.5334	0.05271
									67.3948	0.06062																																68.6664	0.08188
									70.1692	0.08012																																62.9442	0.06617
									64.3314	0.08216																																67.9728	0.08014
									66.3544	0.09845																																78.1456	0.05902
									61.4414	0.0705																																69.36	0.07679
									62.0772	0.09682																																72.4812	0.0619
									64.5626	0.09309																																68.204	0.07126
									71.7298	0.08982																																68.7242	0.05721
									65.3718	0.0798																																64.9094	0.08739
									68.9554	0.0918																																76.007	0.08183
									69.938	0.08885																																71.7876	0.06115
									65.5452	0.08234																																67.5682	0.05597
									63.7534	0.08275																																68.493	0.05491
									69.4756	0.07056																																77.5098	0.06487
									64.158	0.08653																																64.0424	0.07395
									72.4234	0.10049																																69.2444	0.08242
									63.5222	0.06887																																70.6894	0.06596
									62.2506	0.0762																																71.4986	0.06009
									65.7764	0.07228																																64.6204	0.08156
									70.7472	0.08716																																72.0188	0.06718
									67.3948	0.08087																																72.25	0.0846
									80.92	0.10559																																74.3308	0.06056
									72.8858	0.06652																																63.8112	0.06348
									64.158	0.06656																																70.3426	0.07125
									66.0654	0.06779																																66.0654	0.07163
									62.3084	0.08424																																77.9144	0.07575
									69.5912	0.06357																																69.3022	0.08308
									67.048	0.08666																																74.0418	0.07297
									65.5452	0.07121																																69.8802	0.09337
									71.094	0.07619																																70.6894	0.07842
									63.7534	0.05846																																85.4862	0.07737
									76.1226	0.08324																																68.1462	0.07098
									75.0244	0.07049																																77.9722	0.05771
									67.4526	0.0746																																73.984	0.05577
									70.9206	0.07045																																65.5452	0.05004
									63.9268	0.05396																																74.6776	0.07305
									63.3488	0.0625																																67.915	0.0726
									70.805	0.07981																																66.2966	0.07028
									64.2736	0.08932																																66.9324	0.07105
									64.8516	0.06505																																67.2214	0.06407
									60.6322	0.06276																																71.3252	0.05586
									62.3662	0.07793																																77.5098	0.07687
									54.8522	0.07316																																81.498	0.09932
									73.7528	0.092																																68.0306	0.06091
									66.3544	0.07485																																71.2096	0.07194
									59.5918	0.06034																																68.493	0.07007
									64.9094	0.07381																																73.3482	0.07478
									65.2562	0.08327																																68.8976	0.066
									75.3712	0.08811																																64.2158	0.0692
									66.8168	0.08555																																65.314	0.06025
									73.8684	0.06882																																65.8342	0.0856
									70.9784	0.09012																																79.8796	0.07779
									64.2736	0.07783																																69.938	0.07658
									71.094	0.09388																																68.0306	0.07527
									60.3432	0.08557																																67.2214	0.07833
									59.8808	0.07063																																67.5104	0.07047
									59.823	0.06603																																67.6838	0.0651
									66.9324	0.07214																																63.6956	0.0831
									74.4464	0.08876																																74.273	0.0606
									73.3482	0.08827																																73.117	0.07277
									68.8976	0.06806																																65.314	0.07943
									63.2332	0.07801																																63.58	0.06939
									66.8746	0.0849																																69.36	0.06815
									71.4986	0.06986																																63.5222	0.06671
									67.1058	0.08248																																78.608	0.07022
									68.2618	0.08906																																73.3482	0.06652
									65.6608	0.07233																																74.273	0.07376
									77.5676	0.0816																																66.3544	0.07339
									62.3662	0.0752																																67.5104	0.06656
									68.0884	0.05897																																80.342	0.06572
									70.1692	0.08316																																64.1002	0.0482
									61.268	0.07155																																75.3134	0.06477
									74.1574	0.08668																																67.2792	0.06638
									68.9554	0.06749																																66.0076	0.05209
									72.8858	0.0698																																69.3022	0.07337
									68.3196	0.07106																																71.5564	0.09001
									65.5452	0.07527																																66.47	0.06883
									72.539	0.08308																																68.0884	0.06744
									67.4526	0.08151																																63.8112	0.05553
									70.5738	0.07052																																74.851	0.0701
									71.2096	0.08203																																74.7354	0.08482
									74.0996	0.07678																																79.5328	0.07249
									68.6664	0.07367																																69.0132	0.06143
									68.0884	0.08298																																75.429	0.08702
									66.9324	0.0719																																70.1692	0.06819
									67.2214	0.07996																																66.47	0.05768
									73.1748	0.10293																																68.493	0.08549
									62.8286	0.08798																																68.493	0.06115
									72.539	0.09719																																65.603	0.04702
									66.47	0.06519																																63.58	0.06178
									65.8342	0.06798																																67.5104	0.07096
									61.3258	0.09116																																59.8808	0.06148
									63.1754	0.06414																																73.117	0.07988
									71.3252	0.06004																																77.5676	0.04849
									74.2152	0.07595																																72.4234	0.06946
									78.608	0.09212																																61.7882	0.06279
									64.736	0.07472																																67.7994	0.07231
									71.0362	0.07822																																67.5682	0.08383
									63.6378	0.07201																																65.892	0.09045
									73.5794	0.08229																																82.2494	0.08817
									66.3544	0.06346																																61.846	0.04826
									66.1232	0.06479																																68.782	0.06796
									66.0654	0.0735																																68.7242	0.0792
									70.7472	0.0934																																72.8858	0.07551
									64.158	0.08697																																67.337	0.07451
									71.383	0.06424																																66.5856	0.08306
									65.892	0.08863																																64.5048	0.03646
									70.4582	0.07108																																71.5564	0.08967
									69.7646	0.07147																																64.7938	0.0673
									72.7124	0.09611																																77.1052	0.08116
									63.0598	0.08022																																68.8976	0.07418
									62.6552	0.06743																																62.9442	0.05606
									62.424	0.05797																																72.8858	0.0672
									64.447	0.08919																																73.5794	0.04356
									65.4874	0.07602																																67.4526	0.07446
									77.5676	0.08009																																63.4644	0.0691
									65.8342	0.08527																																72.539	0.08199
									68.204	0.09782																																62.5396	0.05808
									72.828	0.08523																																73.2904	0.07915
									64.2158	0.0511																																64.2736	0.06868
									68.5508	0.08418																																60.979	0.08511
									60.9212	0.08694																																70.4004	0.06606
									75.6024	0.08696																																71.7876	0.06388
									67.4526	0.09764																																71.0362	0.05443
									64.158	0.08257																																63.0598	0.06611
									67.3948	0.07909																																77.2786	0.06046
									68.2618	0.09021																																63.002	0.06416
									60.112	0.07098																																71.094	0.06803
									65.025	0.08107																																66.759	0.05442
									63.002	0.09467																																67.2792	0.06983
									55.6036	0.07835																																67.8572	0.05918
									67.1058	0.08615																																69.649	0.06764
									68.3774	0.0788																																67.5104	0.06766
									76.3538	0.07945																																64.6782	0.06113
									68.493	0.08504																																69.649	0.06745
									69.7068	0.07015																																70.7472	0.07479
									69.36	0.08508																																74.7354	0.04832
									63.0598	0.07822																																70.9784	0.06843
									59.3606	0.06183																																66.8746	0.07022
									76.874	0.08674																																65.6608	0.07607
									70.2848	0.08595																																64.5048	0.05834
									68.9554	0.07969																																72.1922	0.10673
									57.8578	0.07985																																72.9436	0.08589
									59.823	0.09188																																73.4638	0.07916
									65.5452	0.08292																																71.7876	0.09107
									68.5508	0.07168																																72.7702	0.05711
									62.713	0.08429																																70.7472	0.0745
									62.4818	0.08992																																66.7012	0.06122
									65.7764	0.08736																																72.7702	0.06576
									74.5042	0.07586																																68.9554	0.07174
									65.7186	0.07957																																61.0946	0.05473
									79.475	0.08675																																72.25	0.05961
									76.874	0.09594																																62.135	0.08221
									66.8746	0.08017																																68.7242	0.06306
									64.0424	0.04972																																67.626	0.07021
									70.516	0.07287																																66.3544	0.07087
									68.0306	0.08698																																70.9206	0.05535
									60.2854	0.06441																																68.0884	0.06943
									76.1226	0.08229																																68.4352	0.07396
									66.0076	0.07226																																64.736	0.06687
									66.9324	0.06821																																74.6776	0.08211
									62.424	0.07397																																76.8162	0.07731
									61.0368	0.07358																																68.782	0.05828
									68.0884	0.07706																																66.5856	0.09033
									69.938	0.07005																																78.1456	0.06612
									63.002	0.07461																																68.493	0.05891
									64.1002	0.06317																																73.2904	0.06651
									73.2326	0.0784																																68.3196	0.07667
									74.9666	0.06941																																72.5968	0.07108
									64.2736	0.08732																																64.158	0.05402
									71.672	0.08102																																63.2332	0.05625
									61.0368	0.07916																																64.9672	0.03713
									73.8106	0.08041																																72.1922	0.07534
									63.6956	0.08424																																70.5738	0.08147
									66.47	0.09204																																71.8454	0.06181
																																										62.8286	0.08682
																																										76.1804	0.07953
																																										72.539	0.07384
																																										66.47	0.06847
																																										72.7124	0.07171
																																										63.7534	0.07218
																																										68.493	0.07244
