# Supplementary material for: Detection of human disease conditions by single-cell morpho-rheological phenotyping of blood
Source: eLife. 2018 Jan 13;7:e29213. doi: 10.7554/eLife.29213 (PMC5790376; doi:10.7554/eLife.29213)
Supplement: Figure 4—source data 1. [file elife-29213-fig4-data1.xlsx]

## Sheet: Figure4
Figure 4A to 3B (brightness example populations for normal, AML and ALL )									Figure 4D (population data in Figure4-sourceData )												Figure 4E to 4H (all population data in Figure4-sourceData )
normal			AML			ALL			ALL						AML						ALL treatment time course population data (Figure 4E to 4G)									ALL treatment time course population medians (Figure 4H)
cell size	brightness		cell size	brightness		cell size	brightness		patient	type	cell size	deformation	E		patient	type	cell size	deformation	E											treatment time	cell size	deformation
[µm^2]	[a.u.]		[µm^2]	[a.u.]		[µm^2]	[a.u.]				[µm^2]	[]	[kPa]				[µm^2]	[]	[kPa]		day1			day7			day12				[µm^2]	[]
70.1114	81.9485		66.5278	84.4484		71.7298	88.7531		1	FAB L1/2	53.176	0.06861	0.499		1	FAB M1 (secondary)	65.8631	0.04157	0.997		cell size	deformation		cell size	deformation		cell size	deformation		day1	48.263	0.05625
67.626	80.3168		65.4874	87.278		53.465	82.2719		2	FAB L1/2	50.575	0.04593	0.605		2	FAB M2 (de novo)	72.0766	0.05113	0.969		[µm^2]	[]		[µm^2]	[]		[µm^2]	[]		day2	47.8584	0.05289
67.1636	82.9408		91.7286	83.4333		59.7074	78.4481		3	FAB L1/2	43.9858	0.02778	0.789		3	FAB M5b (de novo)	65.9498	0.03757	1.073		42.6709	0.05199		35.547	0.02627		34.5644	0.0305		day3	44.795	0.04086
67.7416	82.2126		82.076	89.9949		64.9672	79.9458		4	FAB L1	45.8354	0.04072	0.567		4	FAB multilinear dysplasia (relapsed)	57.3954	0.06316	0.597		50.5027	0.06352		36.1828	0.03425		45.3152	0.06504		day4	45.1996	0.03995
65.4874	80.9204		63.869	89.0429		63.6956	81.1703								5	FAB M1 (de novo)	56.2394	0.04404	0.759		37.6782	0.04716		40.0554	0.0325		46.9336	0.04882		day5	44.6216	0.04228
64.158	82.2461		70.2848	90.3818		50.286	89.6163								6	FAB M4 (relapsed)	60.7478	0.04686	0.823		40.8708	0.04908		35.547	0.02627		42.0206	0.05182		day6	44.1014	0.0383
63.4644	80.7437		69.7646	82.4377		57.222	81.8189								3	FAB M5b (relapsed)	65.9498	0.03736	1.077		49.7194	0.04523		36.1828	0.03425		37.1654	0.04266		day7	41.905	0.03598
75.1978	82.8166		80.9778	86.4635		58.8982	81.2479														45.5797	0.05604		40.0554	0.0325		36.0094	0.03126		day8	41.7027	0.03672
60.5166	82.646		49.3034	89.7509		43.8124	88.165														45.0841	0.06548		43.5234	0.03256		37.8012	0.02136		day9	40.2866	0.03572
69.3022	81.579		63.8112	88.0363		60.112	81.5447														44.9569	0.05481		38.0324	0.04198		39.882	0.03396		day10	39.5352	0.03679
71.2674	81.2892		69.1288	85.6014		59.8808	80.9977														51.3585	0.04875		41.327	0.03561		35.0268	0.02865		day11	38.8416	0.03844
73.8106	81.7079		73.2904	86.3207		55.8926	83.0567														44.5602	0.05264		37.2232	0.024		37.7434	0.0281		day12	37.9168	0.04031
64.9094	81.3032		81.0934	89.2565		56.2972	80.6961														47.4003	0.05353		38.148	0.04931		39.593	0.03425
72.7702	80.5085		64.6782	86.0439		49.708	84.0388														58.0333	0.06176		37.8012	0.02903		33.9286	0.0357
71.8454	79.2775		101.208	90.2936		89.0698	81.113														42.8438	0.04751		42.483	0.03048		35.6048	0.02628
68.5508	82.5742		79.9374	87.9145		62.0772	81.4157														45.3293	0.05926		45.951	0.05459		34.8534	0.03384
69.2444	82.2673		58.378	88.3117		49.708	89.2433														49.2172	0.05071		40.9224	0.04597		42.3096	0.04651
65.9498	80.4501		88.2028	89.2022		49.8814	81.1057														44.3151	0.05801		43.639	0.05014		40.9802	0.0303
57.0486	81.7198		66.8746	89.6877		45.6042	89.038														46.6702	0.0494		37.9168	0.02317		38.0324	0.03613
78.8392	79.286		62.424	89.3738		43.928	89.5504														45.0293	0.04782		43.4656	0.04449		41.7894	0.04205
61.3258	82.7665		69.2444	85.7641		56.2394	80.4509														44.6311	0.04928		39.9976	0.04509		37.7434	0.03071
61.2102	81.7265		70.227	83.8336		69.0132	82.0505														45.1752	0.05378		39.4774	0.02835		36.9342	0.03825
59.6496	81.4156		66.0654	88.7074		58.1468	87.0968														48.3937	0.06936		36.703	0.03581		43.1766	0.035
74.7932	81.4945		65.1984	83.2776		56.4706	82.2713														42.157	0.04194		44.3904	0.03205		34.9112	0.03411
69.2444	80.5584		75.14	86.5262		56.4706	82.2713														42.1621	0.03923		43.7546	0.03646		37.7434	0.05732
70.1114	79.8251		49.708	87.3948		55.8926	81.4048														46.5409	0.03747		39.7664	0.04031		34.7956	0.02358
74.9088	81.1997		69.2444	90.5927		76.296	90.1291														49.6528	0.05028		41.6738	0.02903		46.0088	0.06813
70.1692	80.5878		78.0878	87.0647		53.5806	89.5629														47.4277	0.06531		42.0206	0.0282		39.3618	0.05038
68.8398	80.7747		49.7658	86.5181		53.5806	89.5629														58.9069	0.05398		42.3096	0.03242		35.3158	0.04673
66.8746	82.1061		76.1226	85.3719		66.9324	81.8017														41.5641	0.04858		40.8068	0.03623		36.0094	0.03016
66.4122	80.9655		57.4532	85.9552		65.1406	76.0825														50.7931	0.04774		35.0846	0.03183		30.2872	0.01833
65.3718	81.8878		40.8068	87.6658		52.5402	90.1688														50.4787	0.06982		42.9454	0.03126		32.368	0.04593
73.4638	82.7006		55.2568	88.1604		52.7136	89.786														57.416	0.04507		54.8522	0.04841		34.7378	0.05312
63.1754	81.3392		58.667	88.8234		53.0026	81.9245														45.0373	0.04544		38.4948	0.02819		37.7434	0.02286
78.3768	80.6639		75.0822	88.7523		60.979	81.85														52.5846	0.06438		41.0958	0.02755		35.3158	0.03193
76.4694	81.4651		55.488	88.4096		60.979	81.85														50.1352	0.06511		36.414	0.03555		37.3388	0.04258
68.8398	80.2192		103.52	91.3944		55.6614	82.108														35.9071	0.0309		53.754	0.032		37.859	0.04196
70.8628	81.147		82.943	85.4473		62.1928	81.2806														59.4795	0.08335		41.038	0.03479		36.6452	0.02326
62.7708	80.5024		60.69	89.4687		52.7136	83.7801														45.3918	0.06191		44.9684	0.02941		34.2176	0.02374
71.7298	80.612		86.0642	89.7314		58.089	83.1198														48.3816	0.06048		40.46	0.02959		36.5874	0.01931
75.7758	81.7334		63.0598	83.8255		56.0082	89.6806														53.8447	0.06297		44.8528	0.04043		34.5066	0.04477
76.7006	80.647		55.0256	89.4471		53.2338	81.759														47.6414	0.06111		46.9336	0.06948		37.8012	0.03627
74.5042	83.9023		69.7646	86.5968		61.3258	88.9059														39.5973	0.05259		36.125	0.02451		35.6626	0.06182
67.6838	80.1576		68.782	88.6556		60.112	80.8496														43.8998	0.06042		40.2288	0.0358		42.3096	0.02959
69.649	81.8047		38.9572	87.857		53.4072	81.7594														50.5874	0.05903		43.9858	0.03006		33.813	0.03365
71.2096	80.9533		64.447	89.2282		55.0256	91.0315														47.5357	0.06447		44.3904	0.03659		38.8994	0.03198
65.603	80.3086		62.5974	89.2614		55.0834	81.9443														42.0199	0.04287		42.4252	0.02648		42.5986	0.03012
73.117	82.2577		67.1058	89.1768		50.575	90.6068														50.4472	0.05804		43.4078	0.02941		33.4662	0.03746
67.2214	82.0266		77.8566	91.5314		41.2114	88.1676														51.5026	0.05865		42.5986	0.04339		41.9628	0.0398
71.4986	80.6092		59.4184	86.1835		61.3836	81.9671														44.9957	0.04938		46.6446	0.03331		35.4892	0.03329
64.158	81.665		63.4066	85.3705		55.8348	82.0318														50.699	0.0523		46.4712	0.03727		36.6452	0.03838
76.9318	80.6413		59.0138	89.6643		50.6906	81.8243														56.0828	0.06742		39.9976	0.0333		38.437	0.0397
78.7814	79.9171		81.7292	88.6249		45.2574	90.1258														50.3752	0.04599		43.061	0.03578		35.9516	0.04558
65.025	80.4632		80.2264	83.6238		45.2574	90.1258														49.0439	0.0416		46.0088	0.03763		36.6452	0.03787
64.2736	81.3787		60.2854	85.1229		51.9044	81.7278														46.2603	0.03396		44.7372	0.03566		37.1654	0.03144
64.0424	80.3129		85.7174	91.0191		54.2742	80.4249														50.2922	0.05834		39.1884	0.03001		40.4022	0.02576
61.6148	81.8742		67.3948	87.133		52.5402	90.5694														52.3368	0.05325		39.3618	0.03408		33.0038	0.03031
76.5272	81.3671		59.9386	89.551		65.1406	80.9997														54.3791	0.06043		41.9628	0.0301		36.9342	0.03393
78.897	81.8321		67.7416	79.4042		45.5464	89.3035														36.3571	0.0384		44.2748	0.03687		39.9398	0.05246
65.7186	82.0991		46.4712	87.6164		50.286	89.8441														48.4908	0.07023		42.5408	0.03182		31.6166	0.03833
57.8578	82.9522		81.787	90.0903		49.4768	90.2428														48.0035	0.04936		45.4886	0.03365		33.1194	0.02281
80.7466	80.9605		76.2382	82.4922		65.7186	80.5382														50.2709	0.03069		50.4594	0.04657		39.7086	0.05076
61.4414	80.745		62.1928	81.2025		69.071	82.8234														44.0363	0.01989		38.2636	0.02015		34.9112	0.0275
66.0076	82.4402		67.4526	88.3246		61.4414	82.5797														47.8243	0.05539		42.0206	0.03094		33.4084	0.05251
62.5396	80.1776		71.672	89.4743		63.3488	80.2835														40.0747	0.04247		37.2232	0.02593		42.0206	0.04175
63.1176	79.6089		71.094	90.5406		62.135	79.245														42.3616	0.07069		45.7776	0.05692		43.2922	0.04196
74.7354	81.6828		55.2568	87.9488		40.5178	89.6214														51.7764	0.05611		45.084	0.02715		37.7434	0.05761
71.8454	81.6583		78.0878	90.8736		57.4532	82.6048														45.318	0.04609		45.7776	0.03612		35.4314	0.02755
73.0592	80.9043		60.6322	89.1948		67.2214	83.4403														51.1242	0.03604		43.8702	0.03896		33.9864	0.03755
75.0244	81.3505		58.6092	89.6055		67.2214	83.4403														46.7906	0.05322		50.1704	0.04876		29.7092	0.04021
73.7528	81.4113		65.3718	88.4856		57.8	82.2547														45.0566	0.05442		43.2344	0.03436		38.2058	0.0631
78.4346	81.2725		69.1288	89.4178		55.7192	81.9782														44.6555	0.04975		47.9162	0.04089		41.9628	0.03243
67.8572	81.6067		69.2444	90.651		49.9392	88.6326														49.1838	0.06572		43.1188	0.04065		40.5178	0.02454
60.979	82.3393		52.6558	88.2902		56.4706	81.8017														48.0957	0.05404		43.061	0.04183		34.68	0.04066
73.6372	82.7003		38.6682	86.3306		53.465	90.7517														47.6906	0.04776		39.3618	0.0372		49.2456	0.05037
64.9672	82.9122		60.2276	88.517		62.5396	81.3413														54.4846	0.06504		40.1132	0.03738		36.4718	0.02293
70.4004	81.8339		92.0754	87.1878		64.2158	82.0953														53.1005	0.06844		39.3618	0.0372		35.7782	0.03522
64.7938	82.4391		69.2444	88.4241		59.9386	82.1835														45.6856	0.04906		41.2114	0.03815		39.015	0.05447
66.3544	82.0113		60.7478	90.8269		64.2736	82.7533														51.4825	0.04253		42.5408	0.04238		41.6738	0.03172
67.5104	81.8959		60.1698	89.1296		47.7428	89.9021														33.3718	0.04319		41.5582	0.036		33.9286	0.02094
68.782	82.2956		66.8168	88.6803		55.9504	83.8508														45.5099	0.05659		35.4892	0.02309		41.1536	0.03123
59.1872	81.411		59.9964	87.8361		48.7254	89.405														48.3935	0.05857		41.4426	0.04065		34.5066	0.03157
77.2786	81.3669		68.9554	85.1371		57.2798	84.3526														48.0563	0.05184		43.0032	0.04307		37.9168	0.0402
64.3892	81.4619		68.5508	89.1977		59.7652	82.0486														48.1996	0.05396		42.8876	0.03092		39.3618	0.0349
70.1692	81.4755		38.437	87.9012		46.818	90.5237														50.7068	0.06523		41.7894	0.02747		39.1884	0.0271
72.8858	82.3187		84.099	90.2486		44.6216	88.8003														51.7928	0.05264		41.6738	0.03076		38.3214	0.03006
60.979	82.3851		54.8522	89.056		46.9336	90.1617														53.3341	0.06135		43.639	0.02962		39.1306	0.05479
66.9324	80.6358		75.429	88.5626		43.35	88.3273														50.807	0.05832		38.3792	0.01954		40.6912	0.03865
71.672	81.9293		70.0536	85.0918		38.437	89.224														43.1838	0.05358		42.9454	0.04407		43.2344	0.03482
69.1288	82.3739		71.2674	88.9774		45.2574	88.7403														44.7847	0.04303		46.1244	0.03816		32.657	0.0223
83.232	81.4075		57.8	87.5419		62.4818	84.5965														59.5391	0.04225		41.2692	0.03687		43.639	0.04383
62.8286	82.3823		72.7124	83.8362		55.3146	89.6617														40.7109	0.04729		50.8062	0.03892		38.3214	0.03098
80.2842	79.4715		58.6092	88.8341		62.1928	79.9006														46.3025	0.05315		37.3966	0.0227		38.2058	0.02863
70.1114	82.1354		36.2984	85.6221		61.0946	83.2549														52.7782	0.07525		31.4432	0.01287		37.4544	0.05118
75.429	81.998		37.7434	85.9245		63.291	83.2119														48.3626	0.05193		45.2574	0.0328		36.414	0.03863
66.5278	82.4857		69.4756	80.0096		60.2854	83.2708														31.5104	0.02029		48.0318	0.03672		38.9572	0.03596
67.337	81.6729		52.598	89.7206		46.529	89.0349														46.8669	0.05563		36.7608	0.02793		36.4718	0.03916
74.5042	82.7451		58.1468	87.718		59.534	90.4915														44.8251	0.06288		41.1536	0.03505		38.3214	0.03367
66.9324	80.8789		73.695	85.2558		54.7366	82.7377														46.3346	0.05256		50.3438	0.05294		39.1306	0.03561
61.9616	81.9236		50.5172	88.2781		61.6726	82.6859														47.192	0.05552		49.708	0.03825		36.9342	0.03385
71.3252	82.0725		46.9914	88.9973		59.5918	82.309														50.636	0.04595		38.148	0.02626		41.3848	0.05509
64.7938	81.2791		63.7534	87.506		55.2568	90.5278														35.1773	0.05999		32.079	0.02124		34.5644	0.02629
63.0598	82.8012		71.5564	88.5549		46.24	89.1863														47.8372	0.07193		39.1884	0.03363		45.8354	0.06129
72.7124	80.5063		70.9206	88.5579		62.713	82.628														43.6036	0.04425		45.373	0.06717		42.0784	0.01981
76.8162	80.9048		69.649	88.7177		57.3376	81.0798														46.7019	0.05923		33.5818	0.03205		39.9398	0.03998
75.2556	80.8956		62.3662	88.3232		51.0952	90.1729														43.3718	0.04766		32.5992	0.01853		32.4258	0.03824
65.0828	82.8956		75.0822	87.8455		60.401	82.1701														42.7271	0.05724		40.0554	0.03582		36.3562	0.04499
70.0536	81.7957		68.2618	88.6569		62.6552	82.7106														46.0678	0.058		36.2984	0.01904		40.9224	0.05856
68.7242	83.2489		66.8746	88.3053		63.291	83.0885														46.9404	0.05337		42.3674	0.03003		36.2984	0.03461
66.0076	81.8186		34.7956	87.1473		46.529	90.7192														44.1788	0.04823		44.6794	0.02297		37.8012	0.04173
70.0536	81.0218		60.4588	89.4703		61.7882	80.4216														54.9726	0.06107		41.5004	0.0298		33.813	0.03329
70.516	81.2936		63.6956	90.3396		62.135	80.8868														50.1942	0.05803		45.4886	0.04132		36.8186	0.03356
70.227	81.036		78.3768	91.223		68.3774	81.6382														40.1537	0.03697		49.6502	0.04966		41.905	0.03442
66.0654	82.5321		61.4414	88.3659		48.841	90.0536														51.0485	0.06499		45.2574	0.04388		42.3674	0.04105
67.5104	81.7582		44.1014	88.9994		58.089	84.1167														46.0724	0.0513		44.9684	0.03811		35.2002	0.04159
70.9206	81.8244		42.5986	88.408		62.3084	89.0652														65.3643	0.05741		36.992	0.02339		32.1946	0.02822
72.0766	81.0372		62.1928	89.682		33.0038	87.1953														55.4561	0.0666		46.8758	0.04064		38.9572	0.04032
65.7764	83.3765		58.3202	88.4972		59.6496	81.746														66.5813	0.05061		46.8758	0.04064		42.5986	0.04642
80.8622	82.5208		49.0144	90.2112		57.8	79.9745														46.7063	0.0639		34.68	0.02142		36.9342	0.02638
70.9784	82.6788		76.1804	88.0611		43.2344	87.6857														47.9539	0.06111		48.263	0.03697		37.0498	0.04488
71.094	82.2153		58.8404	89.7831		51.0374	90.6973														49.8609	0.06036		48.0896	0.03644		33.524	0.0344
67.915	81.6986		80.5732	84.9758		43.5234	89.2048														47.2072	0.0563		48.1474	0.03167		38.5526	0.03216
67.915	81.6986		70.7472	83.054		41.4426	89.5798														43.6995	0.04445		42.5408	0.02784		34.1598	0.03636
63.6378	81.9533		70.9206	84.8115		36.7608	85.4808														46.5616	0.08843		44.0436	0.03467		35.9516	0.02513
64.7938	82.8128		53.9852	88.7825		61.7304	80.5382														42.7426	0.04824		36.7608	0.03082		37.8012	0.0263
65.4874	82.1985		64.1002	90.1222		66.9902	81.4893														42.8481	0.0584		42.2518	0.03301		39.015	0.02998
69.9958	81.7541		56.5284	87.4391		68.0306	90.5161														51.0708	0.05783		36.414	0.03803		36.6452	0.02969
69.1288	81.5386		57.8578	88.5232		60.7478	81.3547														42.893	0.05064		34.2754	0.02661		39.015	0.02786
73.9262	81.3348		61.9616	88.5409		57.7422	87.9079														56.1629	0.058		44.3326	0.03515		37.4544	0.06929
73.1748	80.2234		75.2556	81.9523		55.5458	82.084														48.2255	0.05853		43.6968	0.04302		35.3736	0.04458
63.5222	82.5723		82.5962	91.1123		38.148	87.6761														49.6097	0.06089		41.3848	0.04504		37.281	0.03177
65.9498	82.5781		83.232	89.0476		53.0604	78.8585														45.3891	0.04862		43.0032	0.03532		48.1474	0.05125
66.2966	81.7708		69.7068	85.4819		63.6956	78.9583														45.8627	0.07389		49.6502	0.03659		37.281	0.04294
75.7758	81.523		75.3134	86.3388		51.2108	83.7712														46.2236	0.04013		39.304	0.03163		37.1654	0.04662
76.3538	81.5506		39.882	88.9272		62.1928	82.3603														45.7167	0.06159		43.639	0.03147		35.1424	0.03951
73.984	80.329		73.8106	86.8874		35.3736	88.7266														44.0336	0.05557		38.726	0.03977		38.7838	0.04907
64.5626	82.3675		83.0008	90.0911		35.3736	88.7266														50.2945	0.0543		41.5004	0.02965		37.5122	0.02607
63.9846	82.2685		53.465	88.352		59.3028	81.0202														39.8368	0.03694		40.2288	0.02688		36.5874	0.04391
63.1754	82.7207		78.8392	88.1964		56.7596	80.213														33.3018	0.02976		38.8416	0.05085		38.4948	0.02619
79.764	80.3394		54.5054	89.0376		62.0772	81.4083														51.2362	0.06119		40.8068	0.03657		35.0268	0.03106
65.7186	83.1633		87.278	87.0097		48.4364	90.6079														50.9904	0.04821		47.3382	0.0386		34.1598	0.04159
66.7012	83.034		82.5384	90.6889		65.892	83.3119														51.2946	0.06298		35.7782	0.03091		32.1946	0.02434
60.0542	82.6577		61.4992	89.6594		62.0772	80.4653														52.8784	0.06043		38.7838	0.04475		34.9112	0.05277
66.2388	82.2181		75.718	88.8242		63.58	81.8897														49.5838	0.05103		43.4078	0.02981		39.3618	0.02955
62.5396	82.6943		67.5104	88.8601		56.9908	91.3773														36.9557	0.03842		43.6968	0.03402		37.8012	0.06743
61.7882	81.5583		48.6676	84.7484		54.621	88.7206														49.5584	0.05511		33.6974	0.02823		42.772	0.06614
70.1114	81.8251		61.846	90.159		54.91	81.8837														48.4136	0.05685		44.7372	0.07282		38.5526	0.04772
67.4526	81.74		65.7186	88.3769		65.7764	82.0692														40.8348	0.01917		40.9802	0.0346		42.772	0.0422
72.539	79.0093		74.273	88.2922		55.1412	82.2554														46.0021	0.06181		39.2462	0.02715		33.524	0.03343
68.493	80.9971		65.603	89.3581		60.4588	90.3615														44.6897	0.05587		46.4712	0.05883		36.5296	0.02629
66.181	82.1707		63.1754	80.608		37.6856	87.5757														45.7296	0.04044		42.7142	0.03372		33.1194	0.02445
63.6378	81.6864		71.961	86.5977		48.4942	88.9059														41.3927	0.06549		43.639	0.04842		37.4544	0.0391
73.5216	80.8454		37.7434	88.9795		48.4942	88.9059														49.1007	0.05273		41.616	0.02659		36.7608	0.02599
77.5676	81.9976		63.3488	87.6364		46.5868	90.2885														47.9191	0.0513		42.8876	0.03067		31.79	0.05723
61.9038	82.7665		71.4986	87.1562		46.5868	90.2885														48.2089	0.0486		43.35	0.04323		43.5234	0.06946
65.8342	82.6564		78.9548	89.8844		50.7484	90.3862														46.6437	0.04971		45.8354	0.04045		41.2114	0.04397
61.846	83.5743		66.5856	90.3755		57.3954	83.2876														44.1983	0.06419		41.7894	0.04118		39.9976	0.04209
61.846	82.641		52.02	89.3187		82.943	84.9265														44.2205	0.05605		32.5992	0.02012		42.3674	0.04568
76.4694	80.9335		64.2158	89.026		53.6962	89.9931														50.9701	0.07636		40.6912	0.03556		34.9112	0.03901
75.6024	81.1137		73.4638	85.8932		60.8634	80.6873														41.8262	0.04035		34.6222	0.02205		34.4488	0.01407
68.0306	82.8658		62.0772	88.8666		42.2518	89.5198														58.0942	0.05971		50.1126	0.03783		36.3562	0.03818
73.0592	80.9333		52.1934	89.0515		60.6322	80.4405														44.9551	0.04887		39.304	0.05008		39.304	0.04637
74.9666	82.6714		78.2034	84.4211		58.7248	83.54														56.3312	0.0648		40.6912	0.03842		44.3904	0.05429
70.9784	81.111		66.6434	88.8627		58.7248	83.54														45.3419	0.06136		40.5756	0.03307		38.2058	0.03392
71.9032	80.4107		79.8796	90.5393		69.938	91.4254														50.4764	0.05208		40.5756	0.03307		40.4022	0.06487
75.3712	81.0767		83.1164	84.7425		72.7124	80.8962														59.302	0.06855		44.5638	0.04818		35.0268	0.0423
67.4526	83.2579		72.4234	85.6136		60.3432	81.3586														42.7826	0.04943		42.483	0.04828		31.4432	0.04244
67.1636	82.2766		85.1972	90.4129		42.0206	87.5308														43.4281	0.05119		46.3556	0.03966		37.859	0.02966
74.7932	81.3521		64.3314	89.5295		78.4924	90.9027														34.5478	0.00407		43.061	0.0439		39.7664	0.04659
70.5738	82.6491		80.342	89.2975		35.836	88.6064														43.5125	0.06319		48.4942	0.04048		32.4836	0.02637
67.915	81.5085		48.552	91.209		43.4656	92.2811														50.9596	0.04551		48.263	0.04812		39.2462	0.02719
66.6434	79.4428		69.7646	81.9581		47.2804	89.2842														49.1898	0.07997		47.2226	0.03885		35.6048	0.03841
66.4122	78.8049		54.2742	89.0186		78.2034	83.7878														40.6499	0.04555		38.0324	0.04355		37.4544	0.05649
72.7124	80.3362		60.9212	90.6391		67.7994	80.7067														51.8003	0.06426		43.35	0.02813		36.4718	0.02864
66.47	82.8129		63.291	89.2228		51.3842	89.8974														55.6722	0.05027		45.7198	0.04301		36.9342	0.03126
72.7702	81.6288		65.025	85.525		42.772	89.6827														46.5134	0.04916		44.1014	0.03743		33.8708	0.03804
73.5794	83.5085		48.3208	87.7203		54.621	84.3307														48.2818	0.06548		38.8994	0.02342		35.4314	0.04129
62.8286	80.742		75.718	83.313		53.3494	83.4628														48.5932	0.05257		40.3444	0.03038		29.4202	0.02737
66.9902	83.1718		34.1598	87.7675		61.557	84.5824														41.1817	0.03813		46.2978	0.03099		38.726	0.03203
64.9672	80.6214		68.2618	86.3234		61.557	84.5824														44.7341	0.07275		48.6098	0.03981		34.7956	0.06377
64.6782	79.7875		43.5234	89.4131		53.8118	90.7599														45.69	0.06051		32.2524	0.0309		38.3792	0.0403
70.2848	81.579		66.0076	90.7801		57.9734	82.352														55.2919	0.05662		41.1536	0.04062		36.703	0.02526
69.7646	82.1246		70.1114	84.8198		56.8752	83.1186														48.499	0.05596		37.0498	0.03222		38.4948	0.05387
61.557	82.4239		64.0424	81.18		26.3568	86.9402														47.4007	0.06138		46.7602	0.03814		46.529	0.05262
62.7708	80.7764		42.0784	87.6436		58.4936	85.4622														47.2	0.07913		44.0436	0.03383		34.4488	0.04596
68.3196	80.5408		74.273	88.3868		61.3258	81.6195														46.1399	0.04931		51.3842	0.03118		36.8186	0.02456
61.3258	82.6733		60.112	89.1109		58.5514	81.5734														51.4238	0.05611		51.731	0.03693		38.437	0.02355
58.956	80.6274		96.1214	90.9622		53.3494	81.2951														43.1777	0.03462		44.217	0.04828		38.726	0.03443
64.5048	82.6921		63.6956	89.2192		50.575	86.8345														44.9275	0.04007		43.2344	0.02993		49.4768	0.06335
65.5452	82.3983		64.158	88.824		68.782	81.4798														39.5389	0.03862		38.8416	0.03614		38.437	0.02642
67.7994	81.2819		91.2084	87.9741		53.9852	80.8113														46.8779	0.03946		43.2344	0.02993		32.8304	0.04627
59.9964	82.3445		61.4992	89.7567		50.6328	78.9072														46.4409	0.05343		40.5178	0.04143		35.258	0.01904
71.3252	80.9402		74.851	84.5489		60.0542	80.2088														47.8452	0.04761		38.8416	0.03614		37.8012	0.03512
72.4812	81.9365		46.4134	86.8499		62.5396	84.63														44.8911	0.03383		43.2344	0.03496		44.3326	0.05094
77.163	81.4865		59.245	90.7353		57.1064	78.3883														45.1232	0.04942		35.7782	0.03492		35.1424	0.02308
67.5104	78.5241		63.9268	88.0094		35.3158	85.8042														49.8613	0.05589		41.327	0.03133		36.2984	0.03801
59.8808	83.4018		94.6186	91.114		48.0896	90.5145														50.8451	0.04788		47.8006	0.04425		37.4544	0.04097
67.6838	82.5413		66.47	90.0852		56.7018	85.2549														55.9689	0.06303		47.8006	0.04425		36.9342	0.03495
69.4756	82.6122		72.9436	89.8325		49.9392	90.8582														40.7556	0.04382		42.1362	0.0325		34.5644	0.03338
64.736	82.6692		86.6422	87.9899		60.401	81.7806														46.5909	0.05321		35.6048	0.02486		38.5526	0.04356
64.6204	81.7807		74.6776	85.5027		39.015	89.3673														38.9032	0.04118		38.4948	0.03618		35.8938	0.0368
67.4526	82.3061		89.7634	88.1907		60.401	81.7806														50.7663	0.08447		42.5408	0.03932		38.0324	0.03023
74.7354	81.0691		45.0262	89.9946		39.015	89.3673														31.0881	0.02049		42.4252	0.04186		38.6104	0.06244
69.5334	81.0879		34.969	87.9168		42.1362	88.7098														44.6365	0.0475		42.5986	0.03393		35.7782	0.03945
66.2966	82.8688		53.1182	85.1677		51.731	81.2235														48.9568	0.06123		29.7092	0.01814		35.4314	0.04145
62.3084	82.4089		61.0946	85.7498		58.0312	91.2933														40.5016	0.04487		46.8758	0.04365		32.8304	0.04386
64.447	81.3802		77.163	86.918		58.1468	80.8411														44.0612	0.03888		38.3792	0.02315		43.35	0.0346
63.4066	82.39		51.7888	88.6308		65.2562	82.7975														41.95	0.03386		39.7664	0.04994		41.7894	0.03168
68.3196	82.4607		69.1866	89.4912		30.8652	85.6532														46.11	0.05422		46.4134	0.04014		35.4314	0.0375
68.4352	81.7927		59.7074	89.011		52.0778	80.3203														41.6737	0.05116		42.3096	0.03029		38.6682	0.04437
67.5682	83.4635		83.2898	90.1309		64.2158	83.3752														54.8902	0.07087		43.928	0.03061		37.3388	0.04271
68.1462	83.1286		64.736	86.5279		62.7708	83.9932														53.7578	0.06309		37.281	0.03032		36.5874	0.04949
68.1462	82.113		39.5352	88.4495		67.2214	81.7313														49.8141	0.04896		46.0666	0.04069		37.4544	0.0372
71.7298	82.7946		61.557	88.6492		64.1002	82.6238														48.0926	0.04781		35.7204	0.03912		35.6626	0.03139
72.8858	81.8635		74.0996	70.1182		88.6652	88.4541														53.1956	0.04438		43.4078	0.03414		31.3276	0.02522
78.3768	83.4121		86.0642	87.3393		54.2164	84.1503														39.0234	0.04211		46.7602	0.04292		41.5004	0.04045
66.2966	81.4279		54.9678	88.9936		60.1698	81.2895														52.6895	0.05195		41.616	0.03875		44.9684	0.04847
69.3022	81.5932		51.3842	89.3551		43.6968	90.6852														54.7152	0.05763		43.35	0.03368		34.1598	0.02344
63.9846	82.0522		75.7758	90.3563		55.3724	82.1654														46.5116	0.05136		37.3966	0.03032		38.726	0.03554
78.1456	81.1829		98.9536	88.2705		53.2338	82.1134														47.6745	0.05938		35.3158	0.02524		30.8652	0.01237
68.493	79.9837		67.8572	89.4379		60.112	90.2859														52.5789	0.06068		42.3674	0.03221		38.5526	0.02856
64.158	81.385		70.5738	89.5383		55.4302	88.9652														45.558	0.06581		42.8876	0.03702		32.8304	0.04143
73.984	80.2074		64.6782	90.2675		50.9796	81.9324														43.2372	0.04953		39.9398	0.04679		33.524	0.02096
69.36	80.5171		45.662	88.862		44.506	89.0819														50.7394	0.06524		43.0032	0.0307		35.3158	0.0662
70.805	83.4043		84.9082	84.5777		47.4538	87.9821														48.9917	0.05464		42.9454	0.03431		40.9802	0.05282
68.1462	82.5139		67.2214	88.1582		56.9908	88.0569														51.8166	0.06973		38.3214	0.03358		37.9168	0.06126
78.8392	79.8199		67.7994	84.558		56.9908	88.0569														39.9186	0.05264		44.506	0.0365		41.7316	0.05837
63.002	84.1209		66.7012	81.3673		84.2146	90.7176														38.1476	0.03647		37.9746	0.02877		41.7316	0.04201
65.5452	82.3341		47.974	88.1601		57.9734	83.7449														45.6054	0.04712		42.772	0.0356		36.0094	0.05089
64.736	80.728		74.3886	89.5228		56.066	89.4773														43.5034	0.04297		49.4768	0.0445		35.4314	0.05425
65.4874	83.3336		81.209	83.7555		50.4016	90.0434														46.026	0.05902		43.2344	0.05087		34.7956	0.01987
60.5744	81.7908		85.4862	88.5253		52.309	89.0593														53.7077	0.05493		37.5122	0.0389		33.0616	0.0243
71.7298	81.9419		62.3084	89.9805		37.3388	89.8181														45.3248	0.05893		43.2344	0.04493		30.923	0.0249
70.1114	84.2877		61.7882	76.861		41.2692	89.0362														47.231	0.05152		43.8124	0.02643		37.1654	0.03367
82.5962	82.0428		54.4476	88.7691		53.2338	90.5559														53.4113	0.04251		43.2922	0.0341		32.1368	0.03372
65.2562	81.3958		65.7764	88.172		57.222	81.9273														47.3107	0.04403		47.2804	0.03669		37.4544	0.04866
63.6956	82.6745		52.4246	90.2707		67.4526	82.0196														54.2527	0.06457		44.795	0.0392		30.2872	0.05497
63.9268	81.542		42.1362	87.7304		59.8808	82.376														47.9752	0.06416		42.194	0.03454		42.0784	0.03016
72.4234	83.6357		77.6832	89.3958		43.8702	90.7701														41.5288	0.04966		35.0846	0.04226		37.2232	0.04715
66.8168	79.4041		48.3208	86.6369		58.4358	84.9215														42.8919	0.04134		42.6564	0.02644		43.061	0.05506
66.6434	80.3146		67.2214	90.7391		58.2046	90.4034														50.7454	0.04883		39.015	0.04312		36.2984	0.06203
70.6316	81.6135		86.1798	91.151		64.5626	90.6337														44.7993	0.05636		44.1592	0.04187		36.8186	0.04268
64.3892	82.7852		78.2034	87.9409		59.8808	88.7858														40.1257	0.04134		35.0846	0.04143		32.7148	0.03115
66.5278	82.9009		62.3662	89.2351		37.8012	88.8028														47.0827	0.0656		38.8416	0.02224		42.0784	0.0474
78.2612	82.0586		48.1474	88.2883		37.8012	88.8028														47.5264	0.04969		43.061	0.03383		29.478	0.0413
64.1002	80.4312		55.3146	88.8605		64.1002	80.2191														52.8711	0.0742		41.9628	0.02823		40.4022	0.02505
75.14	81.5696		87.6826	90.517		58.3202	90.4373														47.0617	0.05444		43.7546	0.03361		33.9286	0.03186
64.158	81.6535		67.5682	89.4829		47.8584	79.6108														41.0665	0.04613		44.8528	0.03599		40.4022	0.06111
76.7006	81.9666		55.0256	88.1147		51.9622	82.8362														46.0373	0.04308		44.4482	0.03384		42.3096	0.04479
76.8162	81.5363		65.0828	90.8055		43.639	90.3789														30.09	0.0157		47.2226	0.04335		43.2922	0.03283
80.2842	82.8747		67.8572	89.4155		67.337	81.684														58.2838	0.07104		39.9976	0.02924		41.1536	0.03259
68.3196	82.6299		94.6764	85.1033		59.9964	82.1905														41.7088	0.0447		38.437	0.03146		35.4314	0.03121
71.4986	81.3422		59.1872	88.217		74.0418	91.3083														45.6426	0.05784		42.194	0.04038		36.2406	0.04545
77.9722	83.0815		56.5862	87.8192		59.823	82.6993														44.2475	0.05009		44.8528	0.03853		38.3792	0.06967
64.0424	79.4837		76.3538	88.0229		44.5638	90.4696														50.4946	0.0767		40.46	0.03319		35.9516	0.04251
77.5676	79.886		56.8174	87.8401		38.5526	88.5449														45.4238	0.05761		44.795	0.03523		43.0032	0.06009
76.1804	80.5093		71.672	89.1748		55.0834	84.7398														50.3899	0.05388		31.9634	0.02726		44.9106	0.03446
63.0598	83.721		84.388	89.2716		55.6614	90.8191														45.7165	0.05885		40.2866	0.04003		34.9112	0.03169
63.0598	83.721		61.9616	87.9195		60.401	82.037														55.3819	0.04928		44.506	0.03607		32.946	0.03298
74.6776	82.6693		73.0014	87.6239		56.1816	83.9464														53.9306	0.0581		39.5352	0.03461		37.6278	0.03933
69.071	83.9376		90.6882	89.1947		56.8174	91.5617														44.7226	0.05152		41.4426	0.03973		41.5004	0.05503
81.7292	82.5507		62.2506	84.788		56.644	81.1598														46.1234	0.05		38.8416	0.02191		40.4022	0.0408
65.2562	82.4267		56.7596	89.3361		65.603	81.9327														50.8734	0.05218		33.235	0.02512		35.0846	0.0458
65.2562	82.4267		57.2798	87.8281		53.6384	83.1391														48.1604	0.05814		43.9858	0.04675		35.0268	0.03307
67.9728	82.6239		63.869	89.5211		71.7298	82.2217														49.2813	0.07243		40.5756	0.03495		34.5066	0.06663
68.1462	81.8425		69.5912	87.4774		58.7248	82.0387														54.6067	0.06213		42.5408	0.04098		44.795	0.06153
76.7584	82.1822		35.8938	87.9339		56.8752	80.5534														43.7251	0.04909		40.46	0.03278		36.2984	0.02882
66.4122	81.8754		71.2096	90.0676		51.8466	91.9412														54.7465	0.07282		45.6042	0.02685		37.2232	0.04374
61.846	81.6932		71.0362	89.9315		57.222	83.1834														66.4199	0.09668		38.8416	0.04184		37.57	0.0452
70.0536	81.8914		35.3736	87.5673		54.91	82.1285														44.3789	0.03917		43.35	0.03245		49.3612	0.05505
62.2506	82.7117		84.3302	90.3893		55.0256	82.5502														37.4395	0.03605		37.57	0.02911		38.2636	0.04004
66.1232	84.2495		71.094	80.819		61.4414	82.6405														47.0521	0.06192		43.061	0.02965		42.0784	0.04399
62.5396	79.9509		74.6776	89.6586		57.6266	80.7567														46.7106	0.05844		45.3152	0.03677		35.3158	0.04865
78.3768	81.1971		63.291	89.0078		61.1524	81.3932														50.0908	0.05825		44.7372	0.04548		44.3904	0.0348
75.7758	82.0257		112.421	90.6366		59.6496	83.0366														51.9234	0.05697		44.7372	0.04548		38.3214	0.05014
64.9094	83.0723		69.9958	88.9838		47.3382	83.3242														52.0228	0.05845		41.905	0.04056		42.5408	0.03405
70.516	82.0196		51.4998	87.522		62.3084	80.9644														39.6701	0.06084		38.3792	0.03376		35.836	0.0458
70.516	82.0196		65.8342	90.0194		58.3202	81.837														49.4744	0.05501		38.4948	0.02943		36.8186	0.0414
82.076	81.1146		71.094	90.2151		53.6962	81.1306														37.96	0.04192		35.0846	0.03519		37.57	0.04233
69.4178	82.4469		39.6508	88.3759		58.3202	81.837														49.8699	0.066		45.8932	0.04082		38.5526	0.03051
69.8224	81.6132		52.0778	89.354		53.6962	81.1306														53.1751	0.09879		49.0144	0.03797		35.6626	0.03537
64.1002	82.1936		60.69	83.079		51.7888	89.805														46.3717	0.05436		42.1362	0.03938		33.0038	0.03925
75.2556	81.8362		62.9442	83.0326		80.2842	83.4109														54.7891	0.05661		48.2052	0.04889		38.6682	0.03372
74.6776	82.8787		58.667	89.5248		53.176	80.9418														47.6478	0.0469		35.1424	0.03253		39.015	0.03505
70.227	83.1027		45.7198	87.7154		47.4538	90.8943														40.5281	0.0506		42.5986	0.02868		36.5296	0.04228
65.025	81.5049		72.1344	86.5801		58.4936	81.2329														50.1299	0.04897		39.7086	0.04058		42.5408	0.03885
80.8044	81.0584		50.864	88.8039		68.2618	80.0492														50.7777	0.05028		43.4078	0.02968		36.8764	0.04217
70.9784	83.7212		65.2562	87.6257		38.7838	88.721														48.8138	0.04346		43.1766	0.03442		36.8764	0.04547
74.9666	83.3031		63.291	89.1036		65.9498	81.1106														51.5106	0.0682		42.3674	0.04139		39.8242	0.04886
69.7646	82.2968		59.0138	89.4152		61.4992	81.6077														41.397	0.0475		39.882	0.02491		34.5066	0.03011
63.1754	82.7317		67.5682	89.8187		57.8	81.325														48.6191	0.0586		40.6334	0.03949		35.836	0.02575
63.7534	81.8783		76.6428	88.7081		62.8864	83.2849														50.7951	0.05262		34.969	0.02552		42.772	0.05288
69.7646	82.4719		60.5166	89.5255		48.263	82.0926														37.098	0.03152		43.9858	0.03996		36.2984	0.04211
66.4122	81.3456		64.3892	89.4792		57.2798	82.3989														31.2189	0.03559		39.6508	0.0335		43.061	0.04779
74.9666	82.9367		66.0076	89.3259		64.736	81.9518														47.4596	0.05784		40.2866	0.0368		37.0498	0.04127
67.1058	82.2086		75.429	85.2979		76.296	81.0092														53.7969	0.06693		41.7316	0.04203		40.171	0.05859
67.1058	82.2086		78.319	89.9462		52.8292	83.5246														58.3598	0.05349		44.5638	0.03459		39.4196	0.03272
70.6894	81.7763		73.8106	90.8678		50.8062	81.2737														49.8006	0.05208		39.6508	0.04117		40.5178	0.02318
72.1922	81.1469		50.4594	89.9464		38.3792	89.3958														50.6779	0.05693		29.8248	0.03021		42.194	0.05563
74.2152	81.0337		71.1518	89.7558		52.3668	91.2393														47.2338	0.04663		40.6912	0.03556		35.6048	0.06393
61.9038	82.0667		67.5682	88.9885		68.5508	90.4259														40.7037	0.03933		46.7024	0.03712		36.2984	0.04721
64.9672	81.8674		68.8398	80.442		56.644	81.5923														52.2078	0.06159		33.9864	0.02765		38.6104	0.04601
62.8286	80.9351		81.5558	89.4452		52.4246	91.1801														40.7929	0.03475		38.4948	0.03381		48.263	0.05181
69.1866	81.9752		75.6024	88.2868		59.3606	78.4715														53.1512	0.05889		40.4022	0.03385		38.0902	0.02353
64.2158	82.3393		80.6888	85.9615		60.7478	80.635														42.8353	0.05573		44.7372	0.04063		36.8764	0.03467
71.961	82.111		81.2668	91.3187		56.8752	89.2707														48.8647	0.06217		33.9864	0.02765		30.7496	0.03586
62.8864	80.7867		57.1064	87.5824		41.1536	84.5743														43.3997	0.05456		38.4948	0.03381		40.8068	0.04351
68.4352	80.4083		58.378	85.9173		58.0312	86.378														54.8601	0.0673		40.4022	0.03385		34.391	0.02477
65.2562	81.7393		35.4892	86.2425		58.5514	80.9211														46.4519	0.04626		40.2288	0.03296		44.4482	0.04154
67.1058	81.0195		65.1406	89.7138		58.2624	84.9419														46.2005	0.05323		50.6906	0.05001		38.8416	0.05546
67.626	80.6724		86.7578	89.654		52.598	81.9685														55.1392	0.05929		39.9976	0.03571		32.8882	0.02639
65.314	81.2191		79.3594	86.2844		61.6148	83.0309														49.5127	0.05542		41.9628	0.04042		42.0206	0.04688
67.5104	80.9467		67.2792	85.9676		54.1586	83.8933														48.3635	0.05474		47.4538	0.03896		38.8416	0.02938
62.424	81.9716		57.4532	88.5474		93.058	88.2277														48.9774	0.05142		44.4482	0.04772		39.5352	0.0407
63.5222	81.036		57.7422	88.6129		41.327	88.9789														50.1668	0.05689		38.6104	0.04381		38.148	0.0603
70.0536	81.947		74.7932	86.0138		43.5234	87.5425														47.0173	0.07278		49.1878	0.04924		38.3214	0.04385
63.4644	81.6565		65.025	87.2917		44.1014	89.2456														35.5567	0.0482		37.2232	0.02511		41.038	0.04262
74.6198	83.6951		64.1002	89.7293		58.6092	83.1095														44.654	0.04759		49.5924	0.03568		37.4544	0.02928
75.6602	82.5999		62.0194	90.9784		61.9616	82.2382														48.3128	0.06188		38.2636	0.04087		40.171	0.03837
70.9784	83.5533		57.6844	89.034		50.8062	90.5639														46.9487	0.05548		46.6446	0.05035		40.171	0.05092
65.4296	80.2521		58.7826	88.4546		62.7708	83.3888														45.1701	0.04589		41.038	0.03053		43.8124	0.04815
64.3314	80.5966		73.9262	86.1433		59.0138	80.2623														51.9292	0.04874		45.8354	0.03531		40.6334	0.05505
60.8056	82.8463		62.0772	88.3302		44.5638	89.3035														49.1125	0.05341		42.0784	0.03336		34.9112	0.04802
60.8634	81.8015		78.3768	87.4893		45.5464	89.7408														38.5732	0.06548		36.5874	0.02997		36.0094	0.02741
78.3768	80.5717		56.4706	87.8524		56.4128	86.9266														49.0965	0.05084		38.3792	0.03018		34.6222	0.03849
65.7186	81.2269		69.5334	85.3932		57.6844	83.0214														47.9308	0.06192		42.3674	0.03235		37.2232	0.0401
64.9672	80.1488		77.5676	85.2033		51.0952	84.172														52.6882	0.05678		40.9224	0.04859		44.9106	0.0362
69.3022	81.3952		70.2848	83.948		44.9106	89.5092														48.4782	0.06776		40.2288	0.03716		35.6626	0.03174
77.7988	81.1728		63.8112	87.6522		66.0654	84.2202														60.7533	0.05397		38.9572	0.03678		36.9342	0.04386
64.9094	81.9918		68.1462	88.2632		64.5048	81.5362														40.8298	0.05324		40.2288	0.03716		35.4892	0.03729
72.3078	81.9634		77.2786	87.205		65.2562	82.6075														48.3539	0.06211		39.2462	0.05011		43.4656	0.04723
74.0418	82.3625		36.5874	87.2774		59.6496	83.6407														47.483	0.03761		42.194	0.03302		33.6396	0.04333
73.984	80.501		81.0934	85.2607		57.3376	80.9111														46.6087	0.0479		48.7254	0.03799		32.657	0.05693
65.1984	83.1874		95.948	91.0761		55.0256	83.9356														46.4927	0.05304		35.258	0.02768		38.2636	0.05755
67.626	83.2425		60.5166	78.0572		42.3096	89.6695														47.4012	0.04906		38.0902	0.02153		35.547	0.0334
67.048	81.8425		45.7776	88.2004		50.4594	80.6339														44.4486	0.04378		34.68	0.02817		36.5874	0.06305
67.915	81.0672		55.6036	88.759		35.4314	88.5834														47.8714	0.04922		46.0666	0.0383		32.4258	0.05167
66.4122	82.8067		61.7304	85.4116		49.0722	90.446														44.5714	0.03935		42.194	0.03302		29.3624	0.01394
72.7702	82.114		64.2158	88.4602		56.933	82.9311														43.8386	0.04713		40.46	0.03546		37.0498	0.04312
69.1866	81.2281		69.7646	89.0954		57.5688	81.5504														49.709	0.04709		41.327	0.03539		40.8068	0.04882
74.2152	82.1298		53.465	89.2577		34.68	87.4278														43.5386	0.04711		36.7608	0.028		46.3556	0.04694
69.1866	81.2281		73.984	89.9692		30.8652	88.5381														53.4626	0.05585		38.0902	0.02799		33.5818	0.02509
74.2152	82.1298		57.9156	90.4548		60.1698	81.8349														45.2109	0.05039		39.4196	0.02442		38.0902	0.04576
76.8162	82.2924		84.677	84.9419		41.327	89.506														37.094	0.04604		32.5414	0.02469		41.2114	0.05431
69.4756	80.7652		70.805	81.2194		54.7366	91.2568														51.2548	0.05498		38.3214	0.03242		42.6564	0.04668
74.3308	83.7391		49.13	88.5615		48.841	91.3323														52.573	0.05206		45.8354	0.03796		39.6508	0.04509
71.1518	81.5387		62.0772	88.2395		53.8696	90.6319														46.7381	0.05299		41.0958	0.03617		35.4892	0.03633
73.0592	82.6597		70.3426	88.0593		47.8006	90.7099														50.6727	0.05238		36.4718	0.03017		41.327	0.04733
67.2214	82.5267		64.447	89.6439		50.575	90.8756														48.5027	0.05625		43.8702	0.04435		36.125	0.02561
73.3482	82.8226		57.222	88.4965		60.7478	84.316														50.1994	0.04917		54.9678	0.05229		32.7726	0.04662
65.2562	83.1936		51.2686	89.6753		55.9504	91.7708														49.8246	0.07253		42.6564	0.03281		36.2984	0.0193
64.6782	81.9122		57.6266	90.2597		47.5694	81.4124														39.9089	0.03352		37.281	0.02775		35.8938	0.0585
74.7354	82.7053		59.1872	88.9441		60.69	80.9839														36.8903	0.04269		41.4426	0.03116		34.102	0.04463
62.5974	82.299		62.713	88.939		47.8006	89.7562														53.3971	0.06355		41.7316	0.03234		36.4718	0.02575
64.6204	83.1254		59.245	87.6354		56.5862	83.0463														47.0455	0.05455		49.0144	0.04565		37.4544	0.062
66.6434	82.6551		42.3096	88.0845		50.864	84.628														45.2387	0.06003		37.2232	0.02852		35.7782	0.03578
68.7242	82.5548		64.7938	88.3977		44.0436	89.4483														50.9831	0.06433		36.2984	0.03146		37.0498	0.04243
66.8168	81.8871		67.048	88.4772		48.3208	90.0531														48.4459	0.05048		38.0902	0.03581		39.3618	0.05043
77.3942	80.1253		60.8634	89.8561		43.928	91.6423														40.1856	0.04614		41.7894	0.02773		34.2176	0.03301
70.1692	82.2712		64.2158	89.4533		53.4072	80.2007														46.3063	0.03794		38.8416	0.03448		36.4718	0.04285
76.296	84.1493		36.9342	88.1474		48.6098	87.1065														47.7673	0.0493		46.7602	0.03406		35.1424	0.02352
77.0474	83.4989		84.7348	85.4675		69.5912	80.0246														46.4854	0.05344		47.5694	0.04645		31.8478	0.02497
74.6198	80.4996		61.3836	88.3351		57.6844	81.5545														46.8763	0.04815		44.0436	0.037		28.1486	0.01996
75.4868	79.8874		78.1456	87.7002		75.1978	90.8505														52.3175	0.06122		39.015	0.02634		40.0554	0.04041
67.337	82.9249		66.5856	90.263		49.7658	80.4779														51.5031	0.05585		41.905	0.02561		34.4488	0.0516
74.0418	82.8697		42.7142	87.7532		62.6552	83.4704														38.2343	0.04399		43.35	0.03399		37.9746	0.0506
66.8168	82.1792		49.1878	87.9892		65.603	82.1605														44.8487	0.0412		41.4426	0.0353		38.3792	0.02659
74.3886	81.1115		57.3376	87.3873		42.5408	88.495														45.8553	0.055		43.8702	0.04612		38.4948	0.03396
73.9262	80.1578		54.1008	87.6231		63.6956	90.5454														56.2511	0.05922		39.0728	0.02809		41.2692	0.05282
68.3196	84.2492		87.567	84.9264		60.1698	83.7144														55.3294	0.07143		39.0728	0.0402		46.24	0.0627
79.3016	81.8403		66.8746	87.7668		63.1754	82.7973														51.6204	0.04451		40.4022	0.02713		36.4718	0.04248
62.0772	81.4424		72.7124	85.3911		59.1872	84.3742														42.2355	0.05742		38.148	0.03407		35.8938	0.03963
65.7186	81.7585		102.306	86.6264		52.309	90.5418														45.7883	0.05665		42.6564	0.02833		35.9516	0.03514
70.9206	83.0067		68.8976	89.1593		53.5228	81.1342														50.4322	0.05116		45.951	0.06047		40.4022	0.05548
65.3718	82.9193		75.429	91.3118		56.1816	80.7331														45.1558	0.04523		41.9628	0.03147		40.171	0.03494
70.9206	81.0913		47.3382	87.7868		51.731	90.7869														42.1055	0.04692		41.9628	0.03147		36.703	0.02765
68.6086	83.0161		78.5502	88.7237		69.2444	89.2653														49.2356	0.06431		43.1766	0.04076		37.1654	0.02435
65.4874	82.0346		54.7366	87.5393		66.1232	83.2354														44.1326	0.05847		38.5526	0.0302		42.5986	0.04084
64.5048	81.5266		93.4626	91.2866		39.9976	88.2288														41.9086	0.03819		38.8994	0.02347		32.8882	0.02676
79.0704	80.3589		80.1108	88.9919		68.3774	82.8034														48.0425	0.05202		38.8994	0.02347		39.4774	0.04555
75.9492	81.3084		76.9896	89.3461		57.1064	87.0831														50.2961	0.06743		35.836	0.02995		36.2984	0.04508
66.7012	80.752		72.7702	90.1295		56.2394	83.1013														46.6615	0.0617		43.2344	0.04393		47.5694	0.06014
69.36	82.1582		71.3252	88.956		57.3376	81.0545														51.4826	0.07909		46.0088	0.05247		33.5818	0.02539
67.5682	83.5672		69.8224	82.7373		44.1592	89.6007														47.6556	0.06536		45.1996	0.03689		40.8646	0.0548
74.3886	81.0152		38.4948	86.9798		48.6098	81.3539														41.7972	0.07231		38.7838	0.02862		43.2344	0.04111
64.0424	80.8877		65.0828	89.1665		54.043	88.8415														48.9693	0.04869		37.9168	0.03113		40.6334	0.06388
74.7932	83.5571		76.296	84.8497		59.1872	90.833														47.6801	0.04596		36.5296	0.03761		36.8764	0.03431
66.6434	81.1183		82.1916	87.5875		62.713	81.4706														47.255	0.04873		39.304	0.02278		38.3214	0.04607
67.7416	80.3853		78.03	82.6852		85.7752	91.7352														47.7929	0.0446		47.8584	0.03366		35.6626	0.04041
75.4868	81.8879		40.5756	88.0653		51.6154	80.8106														42.7808	0.04951		40.6912	0.02505		41.0958	0.03093
77.2786	80.0487		70.1114	90.1901		65.5452	88.0203														51.1677	0.06013		39.8242	0.03789		38.2636	0.03585
61.4992	82.4098		60.1698	89.5867		53.2338	90.5091														46.2036	0.05012		42.8298	0.0311		38.148	0.06218
66.47	82.3618		57.7422	88.4576		60.112	91.8453														50.7176	0.05236		46.9914	0.03309		39.2462	0.03559
77.3942	81.8898		73.0592	85.1849		39.9398	89.9478														53.3635	0.05867		36.5296	0.02575		37.2232	0.04719
65.1984	83.4482		73.8684	89.4737		66.759	90.8989														50.642	0.05112		46.9336	0.04102		37.3966	0.04134
70.7472	81.5534		78.8392	85.8166		66.8168	82.0461														44.0634	0.06011		38.2058	0.02323		34.5066	0.05183
72.9436	81.9541		90.8038	90.3351		62.2506	80.9608														49.4902	0.05626		50.864	0.06209		37.281	0.03324
75.3134	80.4305		73.8106	88.6012		62.9442	90.4421														43.0953	0.07514		44.4482	0.03629		36.5874	0.04111
70.1692	81.051		56.8752	88.3776		41.905	88.0252														41.4166	0.05732		48.0318	0.02755		40.2288	0.05259
65.7764	81.7727		61.4414	90.384		85.833	92.1293														46.7693	0.05795		43.8124	0.03567		35.6626	0.03678
70.9784	81.1494		75.6602	89.2361		52.02	81.1528														57.2336	0.04071		43.8702	0.0464		42.483	0.03797
63.6956	81.401		81.9026	87.6132		50.8062	89.9116														52.9481	0.04748		38.0902	0.03345		38.0902	0.04096
63.9846	80.619		66.1232	87.7445		59.1872	90.3626														48.1527	0.06613		41.6738	0.02996		42.3674	0.0549
73.3482	80.6223		62.0772	84.8454		57.6266	91.4563														47.0669	0.04596		42.7142	0.03372		40.1132	0.02715
70.7472	80.518		57.5688	89.0718		42.0206	88.7615														44.8537	0.07147		41.7316	0.02929		33.9864	0.06674
69.2444	82.2279		65.603	83.7883		39.3618	87.8293														44.3428	0.04732		57.6266	0.04872		36.125	0.02968
60.5166	81.9457		76.1226	86.449		37.7434	86.5979														48.7938	0.06218		36.0672	0.02854		36.2984	0.03751
68.493	82.113		58.0312	88.1561		59.245	90.6409														44.5286	0.05609		46.4712	0.03689		40.749	0.02809
67.1636	81.883		77.6832	87.811		58.7248	89.8281														47.6304	0.0401		40.4022	0.03488		37.6278	0.04086
63.58	82.7138		72.25	82.872		36.2984	88.9725														45.2633	0.04103		41.1536	0.03797		38.0324	0.04135
72.3656	82.2807		69.1866	88.7036		69.1288	90.0095														60.6908	0.06547		41.905	0.02755		38.726	0.03887
75.1978	83.3472		43.2922	88.1924		62.424	90.7988														57.5857	0.07179		41.905	0.02755		40.5756	0.05428
66.0076	80.7613		48.0318	88.0992		64.0424	79.7807														44.743	0.0986		47.974	0.04295		37.281	0.0305
66.6434	80.9945		59.0716	87.6466		45.662	90.7118														43.6987	0.05192		41.5582	0.0398		48.263	0.04569
71.672	82.072		74.5042	85.1796		49.8236	90.4458														41.9089	0.05761		39.7086	0.03703		33.2928	0.02968
72.9436	79.1053		52.02	88.5637		43.2922	87.9613														50.1394	0.0553		43.5234	0.03102		46.7602	0.04031
63.7534	82.403		63.869	89.6284		64.447	83.4015														56.8396	0.05627		54.91	0.0446		39.1306	0.03786
66.2388	80.116		75.0244	89.1499		73.9262	90.0566														40.2229	0.05755		41.616	0.03146		38.0324	0.02673
83.0586	80.9643		58.089	89.6524		47.1648	90.335														41.1655	0.0489		41.6738	0.03498		37.3388	0.04542
72.9436	81.3274		89.4166	90.7716		67.6838	82.2478														44.6083	0.0547		37.1654	0.02658		35.0268	0.02175
64.158	80.7033		66.2388	88.1429		49.3612	89.3318														48.165	0.05752		41.5582	0.03118		40.2866	0.04234
66.0654	79.687		54.5054	88.4013		50.7484	84.9547														35.1139	0.03069		40.0554	0.02351		36.4718	0.03297
71.4408	81.4142		73.1748	89.9193		51.8466	90.2905														39.0971	0.03971		38.0324	0.06136		32.657	0.03343
60.6322	82.4473		67.626	87.9737		64.447	82.2183														53.3228	0.05746		33.813	0.03008		40.9802	0.04147
61.3258	81.355		70.1692	83.7887		67.626	80.6818														42.1519	0.04611		35.9516	0.03741		37.281	0.03581
68.4352	80.7114		76.5272	88.0595		68.2618	81.7424														44.1117	0.04545		44.4482	0.04426		35.0268	0.05209
74.6198	83.6038		69.7068	90.7071		62.0772	82.4192														45.3626	0.05401		40.46	0.02844		42.5986	0.04426
63.1754	80.8002		69.7068	90.0364		63.002	89.4602														45.9331	0.03341		43.4656	0.03387		36.414	0.04819
74.562	81.066		56.8174	88.86		47.396	88.6431														34.9999	0.02681		43.8124	0.03341		40.3444	0.0371
65.4874	81.9272		67.7994	85.1489		51.4998	90.538														39.1479	0.02098		41.5582	0.03721		36.703	0.03633
79.9374	79.6355		53.0026	88.3009		75.0244	91.1836														49.2401	0.06761		38.726	0.03563		42.9454	0.04874
78.1456	82.2879		70.2848	90.1979		59.9964	91.4764														48.4479	0.04912		38.7838	0.04082		39.593	0.04952
79.3594	82.0786		79.186	90.6031		51.3842	88.4203														50.567	0.05261		41.4426	0.02767		40.8646	0.04094
69.1288	82.1264		48.0896	89.9866		56.933	83.0698														52.0715	0.05224		43.6968	0.03324		35.258	0.03865
69.5334	81.343		76.4694	84.27		71.0362	82.3171														54.6266	0.05433		45.1996	0.03648		35.7782	0.03614
69.1288	82.1264		75.5446	85.2129		48.841	89.0412														47.6202	0.04808		48.8988	0.05506		42.0206	0.05063
69.5334	81.343		66.759	83.0456		38.0324	88.0529														45.1012	0.04835		49.6502	0.03069		38.148	0.0486
68.3196	82.5896		62.0772	89.3743		80.342	71.8341														47.2564	0.05539		38.2636	0.04057		36.8186	0.03779
68.8398	81.8066		76.4694	90.0294		62.7708	90.9789														44.4446	0.05006		39.015	0.0311		44.506	0.04587
70.0536	82.8296		75.429	86.6356		54.1586	81.0919														40.733	0.05108		45.084	0.03541		33.2928	0.04428
70.9784	82.0295		64.736	89.3311		44.9106	88.5737														46.4828	0.05339		41.327	0.02918		43.9858	0.05064
67.337	81.9838		76.9318	87.4591		34.68	87.6743														37.7495	0.04005		49.5924	0.04079		36.2984	0.03708
79.0126	81.0897		60.8056	89.1586		62.713	90.958														54.6469	0.06854		49.0144	0.04388		39.6508	0.03434
65.314	82.1844		50.2282	83.1945		58.2046	91.1352														43.6158	0.06283		40.9802	0.02796		37.1654	0.03222
66.9902	81.6793		29.189	85.7766		46.0666	89.6469														41.6064	0.05333		41.905	0.03618		36.992	0.04435
76.9896	81.0722		59.3028	82.1138		55.777	83.7639														49.321	0.0475		42.5986	0.0315		35.6048	0.03921
72.5968	79.7352		54.6788	88.2595		57.1642	79.4151														43.609	0.04318		43.35	0.03131		38.2058	0.03858
69.4756	83.2113		52.4824	89.8445		50.8062	90.0314														41.2358	0.05048		38.5526	0.03093		43.8124	0.05225
60.8056	82.4898		58.089	90.4322		62.3662	81.2851														41.0979	0.04777		43.7546	0.03173		36.8186	0.03747
61.7882	82.0157		91.035	91.3785		62.3662	81.2851														47.6358	0.05213		42.8298	0.04297		40.4022	0.06239
70.3426	82.7315		71.3252	85.5184		52.887	90.7411														44.1035	0.07399		40.171	0.03263		41.7316	0.04611
64.447	81.3909		56.7018	88.6048		52.309	81.8101														42.2045	0.03883		42.5408	0.04662		40.9802	0.04398
64.7938	82.6686		60.3432	88.5629		32.7726	87.9489														48.9798	0.05232		37.281	0.0401		45.084	0.05729
79.5328	80.2181		60.2854	88.4428		57.6844	91.1761														55.5612	0.04055		45.373	0.0439		32.8304	0.04187
65.7764	81.4591		67.7416	83.8736		50.4016	91.003														51.3481	0.04589		44.217	0.04698		40.0554	0.03855
65.4874	82.1767		59.0138	89.0677		49.9392	89.2925														50.3093	0.06576		42.3674	0.03967		35.7782	0.03561
75.3134	82.0141		66.0076	89.0569		75.4868	82.7236														42.9892	0.05767		40.8068	0.03549		49.6502	0.04781
67.7416	82.5519		61.4414	87.78		72.1922	90.4015														45.0427	0.04834		31.8478	0.02061		43.35	0.05474
65.7764	83.2665		63.9268	88.9959		56.9908	90.9554														40.6296	0.05566		45.2574	0.02472		41.327	0.05028
65.3718	82.0758		50.6906	88.8976		56.9908	90.9554														48.9763	0.04674		44.8528	0.03704		41.0958	0.04066
66.8746	80.4294		69.4756	81.0884		54.1586	82.9151														42.5329	0.0531		39.8242	0.02366		36.4718	0.02991
78.5502	82.1935		51.7888	88.6426		77.2786	91.4758														48.6013	0.04737		42.7142	0.02978		34.8534	0.03254
72.0766	81.7075		40.6334	86.7925		79.186	90.4895														48.4636	0.04727		39.4196	0.03085		32.1368	0.02028
68.3774	81.6583		63.58	89.2167		66.5278	90.8738														43.3213	0.05594		42.1362	0.03614		35.547	0.01897
71.672	79.135		78.0878	91.0944		44.0436	89.9523														51.1733	0.05184		41.8472	0.02513		38.9572	0.03241
64.6204	81.5691		38.437	87.0722		52.2512	89.5602														49.585	0.06558		41.9628	0.03753		37.57	0.04424
67.337	81.4519		76.4694	84.2782		64.0424	80.9171														50.8762	0.06553		42.1362	0.04658		36.992	0.04166
60.6322	81.6303		36.6452	88.3349		56.8174	89.8844														51.6779	0.05776		41.1536	0.03833		33.8708	0.02503
61.268	80.4773		73.7528	85.892		44.9106	90.5044														44.4723	0.0521		48.0318	0.05379		38.2058	0.03168
71.9032	81.091		61.6148	90.017		51.8466	90.0678														41.2687	0.06715		37.281	0.0325		37.6856	0.02529
70.516	81.873		39.3618	88.0287		48.4364	89.5318														55.5549	0.05505		50.4016	0.04103		33.4084	0.02786
77.6832	79.0914		69.4756	90.2001		67.8572	83.8065														45.7868	0.04935		45.0262	0.03927		47.396	0.05499
63.4644	81.4501		58.5514	89.6814		49.13	88.032														45.7413	0.03789		35.0268	0.02533		38.726	0.0294
64.9672	82.7		63.5222	89.9666		47.7428	89.5356														52.8302	0.06589		40.8646	0.03449		40.9802	0.05654
66.2388	81.7447		74.3886	85.4728		46.7602	89.5591														48.9603	0.04754		43.6968	0.02706		41.3848	0.05181
66.5856	81.9559		52.9448	89.6023		45.5464	89.2199														46.3903	0.05064		41.038	0.04056		41.5582	0.03183
62.713	82.3113		66.7012	89.675		52.598	90.0329														47.9846	0.05935		49.3034	0.05127		40.0554	0.05054
65.5452	82.7059		67.5104	88.9366		97.9132	84.1387														42.9998	0.05472		37.3966	0.06674		39.4774	0.06779
65.4874	82.9005		63.6378	82.8225		56.0082	89.7455														36.3238	0.02801		43.6968	0.03943		32.7726	0.03481
75.7758	80.3796		66.5278	88.8815		59.0138	90.0988														39.4811	0.03774		47.7428	0.03743		41.4426	0.05597
71.1518	81.2506		66.9324	90.1182		45.8932	90.6112														53.6401	0.06142		57.1642	0.04323		32.657	0.0306
68.1462	81.3269		65.2562	85.5722		43.6968	89.6468														52.9741	0.05124		37.9746	0.03404		35.4314	0.02969
68.0884	83.3838		50.1126	90.1601		60.8634	82.5024														46.2514	0.06244		43.1188	0.04068		38.437	0.04896
69.1866	83.9604		66.9324	83.2095		50.1704	81.6234														52.6648	0.05131		50.0548	0.0422		36.5296	0.02664
66.9902	81.3245		72.4234	90.2837		49.997	90.1022														52.9375	0.06061		47.9162	0.04501		33.6974	0.05311
68.2618	81.6639		56.7018	88.2967		62.4818	91.8946														46.9708	0.06887		44.8528	0.03283		42.8876	0.06167
76.5272	80.0362		62.2506	89.1342		44.2748	88.2932														52.7822	0.05046		47.9162	0.04501		37.9168	0.04091
70.1692	82.6911		59.6496	89.3247		66.1232	89.7636														47.4106	0.05685		46.7602	0.04016		45.0262	0.05732
75.5446	82.1547		64.3892	89.664		56.7596	81.4593														48.7902	0.04536		52.7714	0.05432		44.7372	0.04032
63.1754	82.2237		92.9424	90.9934		47.2226	89.986														44.4108	0.04335		41.7316	0.04193		36.4718	0.0363
69.1866	82.1642		76.6428	89.9224		69.5334	81.3579														45.9255	0.0555		36.0672	0.03773		34.6222	0.0455
69.1288	81.2205		61.846	88.9402		46.9914	89.8277														44.5896	0.06888		39.304	0.02833		36.125	0.04292
69.1866	82.1642		94.9654	91.4484		46.9914	89.8277														41.877	0.0518		40.6912	0.0385		39.4196	0.03701
69.1288	81.2205		37.3966	87.9832		59.6496	81.5688														53.9392	0.05936		46.24	0.0292		37.8012	0.0482
66.4122	80.952		76.5272	89.731		53.6962	82.162														52.3237	0.06504		40.3444	0.02561		45.6042	0.04496
75.6024	79.822		66.8168	88.6159		73.0592	82.4585														37.9425	0.06668		39.593	0.02833		41.1536	0.02659
78.897	81.0497		91.2084	90.1843		63.0598	80.8917														44.4765	0.06191		36.1828	0.03392		39.4196	0.06499
67.6838	82.1018		70.7472	84.7823		47.7428	89.9284														52.4469	0.08721		43.1188	0.03365		38.4948	0.0458
67.4526	80.5934		65.1984	88.7646		54.8522	89.0289														39.4291	0.04783		41.4426	0.03217		35.258	0.03065
67.6838	82.8836		35.4314	86.035		62.7708	80.5156														48.6108	0.06374		37.3388	0.03541		50.9218	0.05358
62.3084	82.1778		59.245	86.3624		62.7708	80.5156														42.308	0.05993		41.9628	0.04261		45.4886	0.05709
69.1288	81.7279		86.2954	87.1388		57.7422	82.2165														45.8861	0.05974		38.7838	0.03004		33.1194	0.04522
69.9958	81.2097		57.4532	90.21		33.6396	86.8891														45.7843	0.03155		41.6738	0.0396		30.2294	0.01908
74.0418	81.3193		55.3146	88.4612		67.337	82.8122														43.2721	0.04518		48.263	0.03267		36.1828	0.04343
65.7764	82.6466		90.8038	87.8868		60.69	81.7863														41.8687	0.03074		36.8186	0.03005		36.992	0.03793
73.9262	82.7876		67.7994	90.1137		46.1244	89.946														43.8852	0.02237		42.194	0.04501		43.4656	0.03998
60.6322	81.0843		58.6092	87.2722		67.048	80.3565														49.0259	0.06262		39.1306	0.0269		34.6222	0.05136
74.3308	82.0609		68.2618	84.6592		60.8056	83.5863														59.8479	0.0633		44.217	0.03587		33.9864	0.0269
66.0654	82.189		38.437	84.8104		63.0598	81.6211														52.0264	0.04864		41.905	0.02808		40.4022	0.03628
66.181	83.4596		61.1524	88.6627		60.0542	82.6078														42.8369	0.04258		42.194	0.04501		43.928	0.03624
66.8746	82.5759		68.3196	88.0389		57.8578	91.2068														48.4997	0.06995		39.1306	0.0269		35.4314	0.04551
64.447	83.5373		65.025	89.1502		50.7484	89.628														42.8201	0.04852		41.905	0.02808		32.0212	0.02816
69.938	79.8799		65.5452	87.841		57.4532	83.6691														39.1553	0.04862		38.8416	0.02947		37.7434	0.05224
70.6894	82.7476		97.0462	91.5674		49.2456	91.0142														54.356	0.05925		50.286	0.0509		40.0554	0.03781
69.9958	80.5922		65.6608	89.4168		59.823	81.5843														51.8853	0.05086		46.4134	0.04338		37.4544	0.03233
76.9896	82.3965		69.2444	89.871		50.4594	82.5403														47.8241	0.05419		38.148	0.03416		38.2636	0.04804
81.1512	80.6261		38.3792	85.2059		53.4072	89.3892														41.6234	0.05077		45.084	0.05078		43.928	0.03649
65.6608	81.5407		60.7478	90.0809		58.956	90.1877														51.5305	0.06429		41.6738	0.02899		33.3506	0.028
63.8112	82.0743		83.0008	89.3162		45.0262	88.464														47.1884	0.04865		46.1822	0.04023		41.038	0.05433
60.5744	83.3632		54.621	87.9681		60.401	81.9531														47.4469	0.06078		38.6104	0.04832		42.2518	0.04736
73.5216	81.831		72.0766	88.7204		74.9088	90.9794														50.9571	0.05125		42.8876	0.03439		43.5234	0.04645
71.9032	81.1854		77.0474	89.7927		68.9554	82.3634														41.399	0.05178		39.9398	0.04669		36.7608	0.02765
72.4812	80.5631		54.9678	84.2112		68.9554	82.3634														47.0498	0.05152		42.0784	0.03138		36.9342	0.04238
64.158	80.3376		63.5222	88.8745		37.1654	86.9755														34.6362	0.03868		38.9572	0.03117		40.1132	0.04912
65.892	81.1694		68.8398	89.5224		61.0946	80.4049														41.6925	0.03777		42.772	0.02706		36.992	0.046
60.3432	83.8513		90.2258	87.2688		37.1654	86.9755														36.2003	0.03288		30.634	0.03645		40.0554	0.03074
67.7416	81.799		65.314	88.867		61.0946	80.4049														49.0413	0.05095		44.5638	0.02766		39.2462	0.03936
69.5912	82.6654		71.1518	82.2781		54.7944	91.1273														48.8166	0.06847		43.35	0.03392		40.4022	0.02674
56.4706	81.2856		34.0442	86.1292		47.1648	88.7598														52.2852	0.07414		43.9858	0.06038		40.9802	0.05242
66.3544	81.6849		66.181	88.47		50.4016	89.6144														49.4286	0.03692		41.8472	0.05189		32.5992	0.02264
68.3196	81.0827		34.102	85.4736		65.2562	81.7689														47.2181	0.04963		36.703	0.0198		40.3444	0.0352
73.984	81.0582		73.117	84.5597		52.7714	88.3903														51.9886	0.05771		50.5172	0.03638		42.0784	0.04672
71.0362	81.3041		58.089	87.0007		82.5962	91.0301														46.6544	0.03585		41.327	0.03593		33.9286	0.04851
65.0828	79.9444		49.5924	87.4683		71.2674	90.3753														46.3715	0.04946		46.7024	0.0368		35.6626	0.02526
65.7764	82.0515		59.8808	87.8492		55.3146	89.7131														44.9674	0.04882		50.9218	0.05127		38.148	0.05075
74.2152	81.7693		58.956	89.9586		62.0772	83.7351														45.2001	0.05787		41.9628	0.0252		32.4258	0.02666
66.7012	81.5919		57.6844	89.6279		64.3892	89.921														46.0773	0.0545		41.905	0.04095		39.5352	0.02527
63.7534	81.7467		35.9516	84.1244		72.25	73.1816														57.2569	0.0644		46.9336	0.03241		35.3736	0.02657
74.273	83.311		66.9324	88.144		66.8168	80.438														50.9553	0.05569		34.7956	0.03286		38.726	0.04105
75.8336	80.7914		45.1996	89.761		57.7422	90.5699														47.0587	0.06773		45.4308	0.02945		40.9802	0.05672
69.5334	82.0585		54.621	88.9742		60.7478	81.5486														53.8887	0.06903		37.5122	0.02758		38.8994	0.04896
67.7416	81.9856		72.5968	90.4581		65.4874	91.9974														42.683	0.04113		45.7776	0.04647		33.4662	0.03597
82.8852	82.1344		67.337	90.2791		53.8118	89.1931														44.412	0.04852		51.9044	0.03132		34.8534	0.03249
81.787	81.0812		80.6888	86.0876		60.112	79.4741														50.3428	0.04907		43.2344	0.03586		36.414	0.04557
64.9094	82.3873		56.5284	88.7672		59.1872	89.5849														39.5412	0.04416		43.4078	0.03267		35.0846	0.02184
70.1114	83.4742		49.6502	88.3204		55.7192	81.6938														51.3338	0.06064		44.7372	0.0418		40.1132	0.05263
65.0828	83.3096		43.1188	85.7771		43.8702	87.2237														48.3961	0.05561		35.258	0.03335		36.2406	0.04811
66.1232	82.8793		85.6018	90.3162		58.667	82.2223														46.7692	0.07138		46.0666	0.0365		37.4544	0.03674
66.1232	81.5798		90.2836	89.7964		51.8466	89.0195														53.196	0.05745		34.102	0.02389		33.6974	0.02854
69.7068	81.694		55.7192	88.6192		53.9852	88.5943														47.2614	0.05726		39.7086	0.02864		43.639	0.05279
69.7068	81.694		69.36	90.349		56.933	82.6135														48.4032	0.05187		45.4308	0.03493		38.148	0.0286
71.9032	82.3137		63.8112	86.4106		60.112	89.867														39.2357	0.03208		34.68	0.02133		31.5588	0.02423
73.5216	80.3163		76.296	85.447		73.2326	90.0085														46.6016	0.04165		48.7832	0.03076		27.455	0.04746
70.3426	81.5748		74.3308	89.6646		57.7422	90.0749														58.9087	0.05293		45.5464	0.0405		31.7322	0.03514
75.14	82.5064		73.2904	82.7109		57.3954	81.9568														45.9481	0.02648		40.1132	0.03477		47.0492	0.04437
65.5452	82.0381		38.9572	87.4386		55.9504	82.1768														43.8963	0.05208		48.6098	0.03261		33.5818	0.01899
64.2158	82.1286		63.9268	86.889		55.488	90.4768														40.8703	0.05049		50.2282	0.035		32.3102	0.02783
70.0536	81.7353		58.8982	89.8252		31.6166	86.3723														46.9695	0.05012		35.3158	0.03356		44.9684	0.05997
60.8634	83.2919		61.846	90.5618		59.823	82.5879														56.045	0.03901		42.5986	0.04412		37.1076	0.04026
68.5508	82.2099		83.6944	90.4664		71.4408	90.5437														39.8846	0.05256		51.153	0.02943		42.3096	0.06187
69.1288	81.169		37.6856	86.7807		55.8926	90.7176														47.0241	0.07122		40.5756	0.03299		43.1766	0.04566
64.6204	82.6756		66.181	88.5354		64.5626	83.5353														49.5479	0.06335		37.5122	0.02981		34.3332	0.03466
64.9672	80.8123		75.718	83.8326		51.2686	90.0024														46.5031	0.06846		53.6384	0.05223		40.171	0.04493
73.0592	81.7079		54.2742	87.6217		49.5346	90.7239														57.4011	0.06138		41.4426	0.02758		33.4084	0.02716
72.3078	82.7174		56.2972	87.8822		49.7658	79.4203														54.1759	0.06831		42.483	0.03516		35.4892	0.04221
77.5676	80.183		70.1114	90.272		58.378	83.3281														53.3182	0.05103		40.4022	0.02656		41.327	0.04735
61.9038	81.2427		64.8516	89.0475		70.5738	83.1167														49.0747	0.05415		46.2978	0.03884		43.5234	0.03582
69.7646	81.958		53.9852	90.2398		62.0194	79.5422														43.1404	0.03489		47.2226	0.0374		43.6968	0.0515
67.5682	81.1598		66.47	88.5102		47.2804	89.9788														55.1369	0.05256		46.3556	0.03932		45.0262	0.05619
74.851	81.3162		70.4004	90.6309		53.0026	89.5724														51.3148	0.05527		38.8994	0.03906		41.5004	0.05255
74.7354	80.1867		95.081	86.442		55.7192	89.6356														50.8083	0.05689		36.5874	0.03058		38.0902	0.03493
76.4116	80.6774		53.176	89.0985		55.7192	89.6356														45.5577	0.05978		44.217	0.04241		36.2984	0.04532
81.9604	81.6196		73.5794	89.1585		60.112	82.2971														46.8968	0.0486		44.7372	0.02586		31.9634	0.04271
75.8336	82.9039		85.7174	87.1795		63.4644	81.1008														50.8623	0.05491		44.1592	0.04781		41.7316	0.04605
72.4234	81.7557		49.0144	89.9922		54.621	88.0255														45.5771	0.03588		37.281	0.04048		40.2288	0.02535
72.3656	82.1158		68.3196	90.5786		76.6428	83.2262														47.3959	0.04595		46.0088	0.03396		37.57	0.05638
72.4234	81.354		76.1226	90.1795		48.841	90.318														44.2967	0.03427		39.7664	0.04554		37.2232	0.0445
78.03	82.0197		76.7584	89.5516		51.6732	89.364														45.2341	0.0316		46.3556	0.0394		43.8124	0.03661
66.7012	82.4015		111.149	90.2107		66.5856	89.8454														62.3222	0.08869		43.9858	0.04224		33.4084	0.06541
71.7876	80.7712		65.892	91.2591		55.6614	79.233														48.8986	0.05827		40.46	0.03808		38.7838	0.04555
73.3482	82.5156		52.0778	86.065		59.3606	81.7096														51.2218	0.04615		42.9454	0.03163		35.258	0.02718
72.828	80.8667		74.0418	89.949		53.6962	90.7322														41.8561	0.04685		43.1766	0.02506		37.3966	0.03138
72.828	80.8667		36.9342	86.6414		63.1754	80.2976														49.0866	0.06675		32.4836	0.02423		36.4718	0.04741
66.2966	82.5156		52.02	86.9857		44.8528	88.858														47.1122	0.06121		36.5874	0.03477		42.194	0.03715
73.8106	80.6403		60.401	89.19		45.662	88.8007														58.1369	0.08054		46.818	0.04243		37.3966	0.04166
66.181	82.3534		78.319	88.8891		54.2164	81.9022														44.1637	0.06204		42.8876	0.03122		47.4538	0.03032
66.47	81.2625		41.4426	87.9647		50.5172	89.7733														43.0232	0.06152		42.0206	0.03837		41.7894	0.03928
63.6378	82.4443		73.8684	90.1303		66.3544	80.6272														45.5536	0.03388		46.818	0.03307		41.038	0.04546
64.1002	81.4897		44.6216	87.0605		46.6446	81.6543														46.8063	0.0566		38.4948	0.03381		35.7782	0.04889
69.36	81.0663		47.5116	87.9718		63.1176	81.3568														49.4458	0.07318		39.9976	0.04429		40.46	0.03033
62.8286	80.21		34.0442	87.1284		68.6664	82.2352														63.1341	0.09757		44.6216	0.0337		38.3214	0.04655
71.3252	83.7681		56.0082	89.1904		45.662	89.7787														46.6911	0.04117		38.437	0.0366		36.3562	0.03022
64.6782	81.3901		67.6838	85.7164		61.7304	81.2662														41.1372	0.03858		39.0728	0.02241		36.3562	0.05153
68.0306	81.5815		67.3948	90.4207		63.1176	80.62														46.7092	0.05566		42.1362	0.04221		38.2058	0.04317
80.4576	81.9851		68.204	88.9016		63.869	81.2884														46.9027	0.06102		37.9168	0.03097		40.8646	0.0379
64.0424	83.0195		68.204	88.4948		50.4016	89.5326														56.7514	0.07878		41.2114	0.03602		44.9106	0.03752
68.204	80.7043		62.9442	89.7243		66.181	90.1648														41.6675	0.04949		44.9106	0.03656		38.148	0.06753
74.273	82.2913		41.327	87.5974		70.9206	89.8905														44.0563	0.06531		40.749	0.03197		37.859	0.03156
73.406	83.3891		58.1468	89.3442		47.8006	89.1634														47.9804	0.05826		44.3904	0.04499		39.6508	0.03551
68.493	82.8522		75.0822	85.2947		60.2276	82.4057														50.413	0.05284		48.0318	0.06245		35.547	0.04353
77.8566	82.0107		68.9554	89.3992		60.112	81.0218														43.3357	0.05507		44.8528	0.02474		42.7142	0.03499
64.6782	81.8752		65.0828	89.7727		48.1474	89.027														51.6701	0.03903		39.0728	0.03105		41.905	0.043
67.2214	82.4421		42.4252	89.7333		50.286	83.1923														46.6056	0.03191		40.6912	0.05294		36.4718	0.02992
64.158	81.3457		42.0784	86.2948		56.8752	79.4955														42.3231	0.03515		45.1996	0.04343		43.35	0.05118
69.1866	82.4229		43.5234	87.5789		58.2046	81.3039														42.7181	0.04937		41.5582	0.038		31.3276	0.023
60.2854	82.1795		32.1368	86.016		42.483	86.7222														46.1117	0.06135		41.4426	0.02863		37.9168	0.05656
67.4526	81.2679		66.7012	89.1171		46.9914	89.2184														45.6745	0.04638		38.9572	0.03834		37.5122	0.02997
67.7994	81.2478		33.1772	85.6068		51.3264	79.2452														50.8178	0.05866		41.4426	0.02863		41.038	0.03458
62.4818	81.3167		59.0716	87.5344		38.437	88.3034														47.2516	0.04307		41.4426	0.02561		36.8764	0.03635
62.4818	81.3167		56.0082	88.5315		47.974	89.9172														49.8161	0.04394		37.7434	0.02838		46.7024	0.03865
75.8336	81.6664		33.0038	86.1246		59.4184	90.255														49.2635	0.05018		45.4308	0.03571		32.657	0.039
67.8572	79.2871		75.429	87.7945		62.8864	90.7632														44.6412	0.03411		46.6446	0.04177		39.7664	0.03892
68.0884	81.3437		38.0324	88.3892		53.9852	89.4424														66.4135	0.07719		41.0958	0.03975		36.4718	0.04628
66.1232	80.5246		71.3252	87.9678		65.025	90.5229														58.4282	0.07666		37.1654	0.0297		42.4252	0.04907
74.7354	82.4889		70.6316	88.7839		49.3034	89.2976														51.3953	0.04817		38.9572	0.0487		37.4544	0.05605
67.6838	80.9701		49.8236	88.3202		56.4706	83.3142														46.4689	0.0427		40.6334	0.03461		44.6794	0.03704
69.4178	81.1582		66.1232	88.0127		63.869	84.7318														52.5442	0.05221		36.1828	0.03356		34.4488	0.04788
67.4526	80.489		56.1238	88.2939		56.5284	80.209														45.9054	0.04635		52.7136	0.05079		42.8876	0.03843
74.0996	81.1219		62.8864	88.6715		34.9112	86.25														44.2199	0.04019		38.2636	0.04225		36.8764	0.06006
64.1002	81.3435		38.437	88.4338		37.7434	88.4334														47.6968	0.04198		42.7142	0.04929		34.9112	0.03478
69.7068	83.3531		61.6148	87.8942		54.6788	90.8231														38.8636	0.04953		48.7254	0.031		39.015	0.03009
72.1922	82.7682		60.401	89.7452		67.1636	79.7132														41.8824	0.03884		40.9224	0.02842		39.015	0.04922
64.5048	83.084		69.7646	87.081		42.2518	89.234														43.315	0.04133		40.9224	0.02842		33.3506	0.02097
73.1748	82.3552		42.0206	88.6976		51.3842	89.4569														47.7734	0.04616		39.882	0.03372		41.6738	0.05221
76.296	81.582		46.529	86.572		66.6434	80.7298														50.9597	0.04026		38.437	0.03209		42.8876	0.0299
70.7472	82.2606		55.9504	89.6458		49.1878	89.7386														42.1497	0.0434		39.882	0.03372		36.5874	0.03743
71.7298	79.4851		73.2904	87.888		46.6446	89.0683														50.7454	0.04152		33.6974	0.0338		37.4544	0.03772
65.0828	82.6396		70.7472	90.0392		40.749	85.5057														42.9229	0.05934		50.4016	0.04333		36.2984	0.05172
66.6434	82.1658		56.5862	87.9743		51.9622	88.2378														51.7109	0.04596		50.4016	0.04333		38.5526	0.03718
66.2966	80.9151		52.6558	87.6349		72.0188	88.8948														55.14	0.06245		33.1772	0.02727		36.3562	0.05385
65.3718	81.839		36.7608	86.6359		45.7776	87.9394														43.1452	0.03824		38.8416	0.0314		40.0554	0.04252
72.828	80.8445		60.979	88.9999		58.7248	88.2096														45.7515	0.0556		35.9516	0.03628		36.125	0.02666
62.135	82.3418		60.5744	89.0366		50.1126	90.1231														58.1894	0.05145		47.7428	0.04445		38.0324	0.03126
70.2848	80.647		47.5694	88.7615		62.8864	81.9078														45.3826	0.05333		40.8068	0.03759		38.0324	0.04556
64.736	83.1641		74.273	90.4177		44.6216	87.644														38.3098	0.04646		49.1878	0.05422		43.928	0.04827
65.5452	80.2454		77.1052	86.2443		59.1294	90.3319														48.776	0.06029		43.8124	0.0318		37.6856	0.03641
65.1984	81.1693		66.9324	89.3907		47.0492	88.905														49.152	0.07017		48.552	0.03401		36.0672	0.0537
66.5856	79.589		74.0996	88.6927		46.818	89.0083														48.8032	0.03918		43.35	0.0285		33.9864	0.03121
65.7186	82.0456		63.58	88.5863		58.4936	73.8468														45.8584	0.06814		47.2226	0.03585		35.836	0.02194
69.2444	81.4528		56.2394	87.9857		68.3774	88.7113														44.315	0.08519		46.9914	0.06021		37.9746	0.05229
78.9548	81.4947		56.2972	89.2003		58.2046	89.6126														46.9996	0.06055		39.9976	0.02419		34.2754	0.05507
78.03	80.7899		49.8814	88.449		57.2798	81.5189														47.9193	0.06049		43.4078	0.02597		37.859	0.036
68.5508	81.3604		63.8112	87.58		38.9572	87.3625														47.6445	0.06467		40.3444	0.02366		37.0498	0.05708
78.608	81.8929		70.7472	88.4089		45.662	89.0092														47.1393	0.04969		38.2636	0.03207		37.281	0.02675
70.8628	81.4602		73.406	87.374		37.859	87.6051														32.6216	0.03021		39.7664	0.03389		39.7664	0.02486
60.9212	81.6913		91.1506	86.6727		60.69	87.7904														41.107	0.04176		47.2804	0.03057		38.5526	0.03824
71.4408	81.3414		82.076	86.069		74.9088	90.8299														43.9012	0.0609		38.0324	0.0263		39.2462	0.03491
64.447	81.7764		72.25	90.778		64.0424	79.5257														39.5043	0.05312		37.0498	0.02437		32.2524	0.04229
73.8684	81.8035		50.864	88.8323		47.8584	89.6455														39.9445	0.04436		46.7024	0.04401		50.286	0.04972
77.9144	81.6902		61.7882	87.3619		79.5906	91.1288														37.0831	0.02587		43.0032	0.04227		42.9454	0.02748
67.7994	81.05		54.91	88.6559		64.9672	87.087														49.1733	0.06038		49.0144	0.05061		40.8068	0.0595
74.2152	81.8822		58.7826	88.8894		66.3544	89.6234														50.2976	0.05786		43.8124	0.03264		33.9864	0.04205
66.9902	83.1475		66.8746	90.2381		52.8292	81.2363														52.5375	0.06599		42.9454	0.03279		32.7726	0.04632
68.5508	80.9698		80.1686	89.2902		55.0256	81.3733														50.0065	0.03659		46.9914	0.04136		40.9802	0.0435
76.0648	80.4681		70.6316	89.7409		47.5116	89.0461														57.2311	0.06695		37.57	0.03099		36.6452	0.05167
65.892	83.5597		89.301	88.5711		69.7068	89.8799														55.4421	0.07302		34.2176	0.02279		34.969	0.03672
74.4464	81.3885		64.3314	85.6897		60.7478	79.8065														52.2249	0.07019		45.373	0.03299		35.4892	0.04186
67.3948	81.3476		62.8286	89.7972		54.3898	80.6394														47.6579	0.06054		37.7434	0.03097		39.4196	0.0627
68.0884	81.596		79.9952	88.9393		50.6328	88.792														48.8196	0.04624		41.7316	0.03557		38.8994	0.04633
69.4178	80.401		69.938	81.2859		62.424	89.8053														43.968	0.04429		41.905	0.04039		39.4196	0.03984
59.7074	81.1337		68.7242	89.8049		34.7956	82.313														44.1545	0.0484		41.7894	0.02078		37.281	0.0597
78.1456	80.1424		51.9044	89.8657		33.813	83.3984														65.2348	0.05103		37.9746	0.02777		37.5122	0.04994
65.8342	81.5404		69.4756	90.2938		52.6558	78.7902														45.7975	0.04664		47.1648	0.03804		32.7148	0.01793
63.291	81.1735		58.2046	89.8785		61.557	79.7406														56.3556	0.05326		44.7372	0.05206		37.1076	0.04348
75.3134	80.9249		65.4874	87.4846		57.0486	81.191														46.2489	0.05392		43.2344	0.03982		37.9746	0.06618
69.2444	82.065		81.7292	84.0914		57.4532	80.7461														39.601	0.04559		35.8938	0.03484		40.8646	0.0392
69.5912	81.1792		68.7242	90.0914		54.332	89.8915														42.6341	0.04604		39.7664	0.05655		42.7142	0.06325
62.713	82.6509		73.984	87.9689		53.8118	89.3842														50.4287	0.05568		39.2462	0.04125		48.7832	0.05711
70.6316	80.4446		55.7192	87.578		53.5228	89.064														45.6173	0.05221		38.8994	0.03128		38.6104	0.04388
72.828	82.3187		58.0312	89.1487		59.7652	80.8056														47.1633	0.04389		43.6968	0.0325		40.171	0.04298
70.2848	80.2539		74.5042	89.2746		52.598	90.8273														44.462	0.0364		42.772	0.03062		40.0554	0.04526
79.186	82.4109		63.9268	88.4653		52.598	90.8273														44.0077	0.04709		40.2866	0.03479		36.125	0.03864
79.6484	81.6197		75.718	89.3384		60.401	80.5403														46.5412	0.05891		43.061	0.03326		38.437	0.06025
70.7472	81.8957		46.9914	88.6949		57.8578	79.1985														45.1923	0.04931		49.0144	0.03449		37.3966	0.06999
76.4694	81.779		72.3656	89.349		53.465	80.0068														54.0006	0.04347		47.974	0.03905		38.4948	0.04289
67.1058	82.2114		63.8112	90.5889		66.181	88.5736														55.9174	0.04778		49.2456	0.03785		40.6334	0.04714
71.8454	81.7792		70.516	87.7338		58.7248	79.5659														43.2357	0.05144		44.506	0.03141		42.2518	0.04346
84.2724	80.1228		51.0952	88.7233		59.4762	90.8842														39.8519	0.05014		46.5868	0.03374		37.3966	0.03158
63.2332	83.5212		62.1928	81.4198		39.2462	88.3373														47.4074	0.0528		34.7378	0.03753		31.2698	0.03961
68.782	82.5899		58.7826	88.7299		45.1418	88.1859														45.8676	0.04985		48.1474	0.03188		40.9802	0.04193
74.7354	83.0666		58.4358	83.8887		77.5098	89.1495														49.4706	0.06044		38.148	0.03224		37.6856	0.05194
65.5452	82.563		64.6782	89.2406		51.4998	89.5527														57.6856	0.05501		39.5352	0.02924		44.9106	0.05307
66.9902	81.0272		67.337	84.8378		53.9852	89.2813														46.9306	0.04259		39.8242	0.03268		37.9168	0.05642
74.7932	80.4643		65.1406	88.2033		41.8472	88.6864														59.9485	0.06578		39.8242	0.02581		32.946	0.0431
67.5682	82.521		42.2518	87.2802		59.1294	89.7967														48.5343	0.05529		40.6912	0.03033		37.7434	0.03116
64.2736	80.0904		89.4166	83.0569		55.0834	89.4453														45.6591	0.04566		38.6104	0.04294		32.657	0.03649
65.1406	81.4125		48.7832	88.1827		49.9392	87.3728														47.8243	0.04342		41.7316	0.04011		34.969	0.03505
63.2332	81.9796		69.2444	88.5557		43.061	87.621														42.9737	0.05414		47.8006	0.03727		37.1076	0.02753
71.4408	82.2853		74.6776	85.8411		60.69	90.3755														48.9963	0.06982		49.3612	0.03552		32.946	0.04076
73.5794	80.6579		56.5284	87.975		54.91	87.8623														55.3374	0.06888		41.1536	0.02674		40.171	0.04174
66.181	82.6596		75.0822	88.3927		44.3904	87.9169														49.5925	0.04782		42.4252	0.02759		37.859	0.03856
69.7068	81.538		68.3196	88.8053		49.708	89.7274														46.6935	0.06255		39.1306	0.03111		36.0094	0.0378
67.9728	82.6998		37.9746	87.3367		54.332	87.6121														46.7804	0.04027		43.1766	0.0349		37.9168	0.06336
69.1288	82.336		95.4856	89.52		41.7894	86.6863														53.7097	0.05844		42.772	0.03262		37.281	0.03176
64.3892	81.1346		62.1928	88.4367		54.7944	89.591														50.2654	0.05546		49.3034	0.03825		39.0728	0.03988
62.2506	82.0681		58.1468	87.9157		54.91	88.8168														45.6819	0.04278		48.4364	0.04134		41.3848	0.03767
63.291	82.255		86.4688	85.0047		57.4532	89.6198														43.5969	0.06328		45.662	0.03747		37.1076	0.04077
75.5446	81.9614		100.861	86.4061		69.7068	81.9241														44.3427	0.05177		41.5004	0.02827		37.9168	0.05072
66.759	81.997		72.8858	83.6777		81.4402	81.7447														50.6698	0.0606		46.1244	0.03279		41.9628	0.05598
76.8162	81.7945		78.897	86.8746		52.887	89.9146														50.8992	0.05078		45.4886	0.03706		38.5526	0.02406
72.5968	82.6171		70.805	89.5414		41.327	86.4487														45.7309	0.05006		39.2462	0.03089		46.4134	0.03855
74.3886	80.9414		72.6546	85.1503		48.4364	90.1128														45.8116	0.05464		38.3214	0.03941		43.6968	0.03719
81.3246	81.2822		79.475	89.6798		64.736	79.6497														45.857	0.06124		41.9628	0.03586		39.593	0.04338
71.961	81.6429		63.5222	89.2756		62.5974	88.9257														37.9485	0.044		42.0784	0.03756		30.6918	0.02914
73.5794	82.1766		86.9312	88.2356		53.0604	88.837														50.8026	0.07219		46.0666	0.03543		44.6794	0.04565
71.7298	81.9977		69.2444	87.9352		51.9622	83.6315														48.0967	0.05523		49.4768	0.03943		39.0728	0.05347
72.7124	81.2797		62.713	88.7698		51.9622	83.6315														45.8659	0.05554		42.8876	0.04749		38.8416	0.04303
73.2904	80.0632		69.938	88.7997		58.2624	81.455														46.2649	0.05969		36.414	0.0323		31.7322	0.03941
65.2562	80.9755		89.4744	84.1237		60.2854	89.62														43.746	0.04969		41.616	0.03727		45.373	0.03573
77.3364	82.0085		70.227	86.1029		41.7894	88.4477														55.0282	0.05988		40.4022	0.02548		33.9864	0.03703
70.7472	80.0564		96.5838	91.311		72.828	89.4557														35.905	0.03863		39.3618	0.03708		38.726	0.0535
65.025	82.1017		74.0418	89.1568		52.3668	89.4723														52.9337	0.06793		41.5582	0.02732		36.4718	0.04477
73.0014	83.1748		71.6142	89.8722		89.5322	89.8274														50.0056	0.06178		47.974	0.03332		40.46	0.05919
66.1232	82.4596		55.8348	88.0709		96.0058	86.0669														54.7427	0.06467		43.35	0.03031		40.4022	0.02879
66.8746	81.7051		73.984	85.8968		57.511	90.5965														51.9783	0.05608		35.4892	0.0356		38.6104	0.03219
65.2562	81.7137		68.4352	87.8154		73.8106	90.0235														46.5558	0.04685		42.1362	0.03712		39.1306	0.03728
70.4004	81.5105		52.2512	89.026		51.8466	82.8822														46.6944	0.05113		42.9454	0.04005		39.015	0.03946
71.6142	81.8417		58.7826	90.2634		42.0206	86.884														49.89	0.03561		40.5756	0.03507		39.5352	0.03609
62.4818	81.1742		51.442	88.3588		47.5694	88.9435														49.0144	0.06518		39.1306	0.03212		40.171	0.04958
68.3774	79.1994		69.071	86.1451		51.7888	88.4725														48.2117	0.04452		39.6508	0.02632		40.8068	0.03711
68.3774	79.1994		56.4128	89.209		59.0138	89.5318														48.3676	0.07874		41.3848	0.02913		38.6104	0.0351
71.8454	81.8652		78.5502	88.5416		59.3606	89.2451														53.4043	0.0431		46.9914	0.0295		42.8298	0.05046
65.0828	81.7036		41.4426	87.7956		45.5464	88.2141														49.3105	0.056		39.3618	0.02745		43.1766	0.0447
62.9442	81.6616		77.2208	89.129		46.818	88.3048														47.1338	0.04564		43.6968	0.03356		38.8416	0.03621
69.1288	83.5537		58.7826	88.7615		54.1586	79.737														46.9959	0.06121		35.0268	0.02586		43.1188	0.03875
65.025	80.8053		75.5446	82.9802		47.2804	88.3114														37.3407	0.0375		43.1766	0.04089		38.4948	0.05434
73.406	81.4974		71.7876	90.1649		55.8348	81.4617														54.7623	0.0239		42.6564	0.03		36.414	0.05829
66.7012	81.8338		70.8628	87.8713		56.5284	89.431														46.6764	0.05324		45.3152	0.0347		31.1542	0.01596
71.2096	82.0561		63.8112	89.9685		48.7832	87.9625														43.1649	0.04514		53.2338	0.04398		40.0554	0.02506
70.516	81.2509		60.4588	89.0801		65.9498	80.5047														50.1037	0.06142		43.639	0.05083		38.7838	0.02722
70.516	81.2509		60.5744	86.7862		55.8926	87.9483														46.2878	0.07013		47.8006	0.04259		35.2002	0.03429
77.163	80.2594		61.1524	88.3282		44.7372	88.8991														38.9334	0.03985		41.9628	0.03697		37.7434	0.03737
63.0598	82.1591		82.7696	90.6595		55.2568	88.4958														45.2577	0.03419		49.997	0.0351		36.8764	0.03183
68.782	81.8203		70.0536	83.798		55.1412	81.3149														45.5512	0.06057		36.9342	0.02767		39.1884	0.05115
80.2264	82.3479		56.066	86.8865		57.6844	81.7652														37.5161	0.02856		36.9342	0.02767		37.9746	0.03061
64.8516	82.0588		71.4408	84.3732		56.5862	89.7874														44.3734	0.04594		42.8298	0.03495		40.46	0.04154
65.892	81.7946		60.5744	88.4594		53.176	87.5458														48.4856	0.04596		45.1418	0.03596		40.0554	0.05177
67.7994	80.6775		79.5906	89.9346		64.3314	82.4007														43.961	0.03291		47.2804	0.04293		42.3674	0.06575
68.3774	81.4531		59.245	89.3559		53.1182	88.9048														66.7029	0.07629		41.2114	0.03213		38.3214	0.03888
70.9206	82.7933		53.8118	88.3915		41.2692	88.3262														44.6491	0.04456		47.107	0.03004		38.0902	0.04883
60.979	82.8585		50.0548	87.743		61.2102	79.8764														40.4149	0.05226		48.552	0.03234		41.327	0.04594
75.3712	82.4234		70.6316	90.8643		46.529	88.8592														30.47	0.00641		39.4196	0.0302		40.46	0.06241
63.2332	83.7401		74.0996	80.7769		48.2052	87.5451														48.5469	0.05032		37.8012	0.02706		39.1306	0.04127
62.7708	83.1041		61.268	89.2346		57.9734	78.3544														41.9871	0.04963		46.9914	0.0287		39.7664	0.03868
80.92	79.6816		58.2624	87.417		49.13	88.0132														47.6738	0.0557		40.8068	0.04197		32.8882	0.03165
64.9094	80.382		74.5042	86.7564		40.46	85.781														46.2124	0.05056		35.3158	0.0227		39.4196	0.04522
76.7584	80.1726		54.1008	88.1765		73.1748	88.4483														52.1954	0.05638		45.8354	0.04021		43.5812	0.04718
68.6086	81.5365		61.557	85.6416		71.8454	81.7106														49.8562	0.05844		40.8646	0.03588		36.6452	0.04934
66.2966	81.1746		86.1798	88.4372		65.892	87.5425														67.3012	0.06919		40.8646	0.03588		41.9628	0.06712
68.3196	81.7932		91.6708	91.3572		59.8808	83.6814														50.8669	0.04924		44.217	0.0395		38.6682	0.04722
68.2618	80.5451		56.355	87.2316		61.7304	90.5545														50.9912	0.05605		40.4022	0.03152		35.7782	0.02267
64.0424	82.4346		68.1462	90.6477		87.1624	80.1345														40.8996	0.04885		43.928	0.03383		44.795	0.03304
63.8112	80.629		74.3308	90.5048		54.043	79.2885														53.1694	0.05386		42.2518	0.04992		35.2002	0.04916
74.9666	80.3405		64.3892	89.0579		61.9616	91.2758														53.4976	0.06477		45.2574	0.02553		35.6626	0.04752
58.7826	80.8296		89.1854	89.6022		58.378	80.3851														44.9297	0.03959		38.437	0.02775		40.5756	0.03684
67.5104	82.313		73.1748	83.8423		68.0884	80.3256														48.6858	0.05029		40.2288	0.0279		30.9808	0.017
68.0884	81.706		66.2388	80.905		62.6552	81.1451														47.5909	0.04568		39.4774	0.04573		35.6048	0.02522
67.915	80.4399		63.4066	89.8819		46.1822	79.7169														45.359	0.05255		39.8242	0.02876		34.9112	0.02366
70.6316	82.8388		63.58	89.7122		32.5414	85.7535														46.5851	0.06216		45.4886	0.04093		40.8646	0.05897
69.071	81.0484		59.0716	89.4249		68.204	90.551														33.2823	0.02392		43.7546	0.03188		39.5352	0.03452
66.8168	82.6035		36.8764	87.9677		56.2972	90.1485														48.9782	0.05856		40.5756	0.03322		35.4892	0.03135
68.8398	83.5139		68.0306	87.9976		60.4588	81.1255														43.074	0.0578		40.46	0.02961		36.0094	0.05367
73.8684	81.7655		76.874	87.0737		69.3022	81.582														46.2808	0.0597		38.148	0.05532		31.6166	0.01789
76.585	82.2858		102.017	90.3016		52.5402	79.5738														40.1373	0.02236		32.3102	0.03166		39.1306	0.03492
72.3656	82.6316		67.1636	88.5025		53.5806	82.8066														48.5412	0.05922		38.437	0.04562		37.281	0.02957
66.8746	82.6786		59.0716	89.2247		59.8808	88.538														51.2715	0.05749		34.4488	0.02455		42.3674	0.05178
68.493	81.9991		69.3022	88.732		60.0542	80.9316														48.7079	0.05007		47.974	0.02618		36.7608	0.03406
77.5098	82.0533		70.8628	86.2978		49.9392	87.3802														46.946	0.05048		37.6856	0.04287		48.7832	0.06107
66.181	82.5068		53.5806	89.8755		42.7142	89.2645														46.9175	0.05197		38.0902	0.03747		40.8068	0.02804
65.0828	82.7872		65.603	85.7339		72.7124	87.8823														55.0601	0.06116		41.2114	0.03848		39.7086	0.05567
74.4464	82.6902		66.5856	83.1619		53.2916	88.3829														36.6124	0.03376		39.1306	0.03282		39.304	0.03953
63.2332	82.3253		58.1468	90.4868		59.245	80.8517														50.3502	0.07139		42.5408	0.02563		36.8764	0.04195
66.8168	81.798		69.649	84.6737		31.6166	87.7379														50.3968	0.05917		35.4892	0.03043		37.0498	0.03176
69.071	81.6034		38.148	87.7915		47.974	88.3997														46.3758	0.05149		46.9336	0.02804		34.1598	0.03965
81.9026	83.7905		70.1114	87.8106		75.1978	79.9123														44.0174	0.05022		38.148	0.04649		44.9684	0.0561
82.5962	80.8327		66.2388	86.3408		45.7776	88.4818														48.0438	0.05763		44.3326	0.04436		40.4022	0.03379
69.649	81.6091		74.6198	90.6939		58.8404	82.4608														48.7315	0.06063		39.8242	0.0253		37.9168	0.02479
69.8224	81.6805		62.6552	89.0492		64.736	82.0055														53.4747	0.06253		36.1828	0.02599		35.6048	0.03391
79.4172	81.4825		76.1226	90.1116		76.7584	89.2344														47.633	0.04976		40.6334	0.0286		42.3096	0.04628
61.0946	83.3507		80.4576	89.8169		50.575	89.3669														56.6424	0.07437		49.13	0.04933		50.3438	0.0552
60.0542	81.519		75.7758	89.1096		65.4874	80.3413														37.5641	0.04375		38.8994	0.03339		34.969	0.05114
61.9038	82.4565		78.1456	87.8571		62.713	80.2212														40.1739	0.03689		39.1884	0.02322		38.3792	0.04557
76.874	82.3844		65.314	89.2166		60.5166	88.9651														47.503	0.05159		47.974	0.04222		39.4774	0.03186
69.4178	80.928		34.4488	87.286		62.1928	80.2941														56.6673	0.05734		40.9802	0.03862		39.1306	0.04812
61.4992	82.14		58.2624	88.4146		50.3438	88.2871														46.517	0.05857		36.4718	0.03988		40.2866	0.0574
68.3774	80.9544		63.4644	89.2136		60.112	81.3017														49.1108	0.03633		44.9106	0.02308		36.2984	0.04018
68.7242	81.9877		88.2606	88.3512		49.4768	89.88														51.5416	0.05894		36.0094	0.02789		38.2058	0.04934
60.5744	84.3998		88.145	83.3624		59.7074	91.2362														45.5166	0.0545		40.8068	0.02668		48.0896	0.04708
65.314	82.2408		66.8746	88.0373		53.176	87.6545														46.2102	0.05058		41.0958	0.02684		39.304	0.04294
73.0014	82.8642		69.9958	89.8969		47.1648	88.7217														61.5772	0.05649		52.8292	0.04875		39.8242	0.05832
73.3482	82.0343		81.3246	87.3243		46.9914	80.2603														49.0819	0.06082		33.7552	0.03107		36.992	0.03097
72.5968	81.3933		64.447	89.499		47.396	89.4941														41.9218	0.05583		39.6508	0.04848		37.1654	0.05506
68.4352	82.0621		36.5296	87.455		89.301	91.2584														40.8793	0.05484		54.2742	0.05557		31.3276	0.03823
72.1922	81.0673		73.0014	87.3194		74.7932	83.6035														56.8452	0.0649		44.2748	0.03901		42.8876	0.04563
71.094	79.7512		68.6664	82.7703		75.6602	90.5501														44.1188	0.03874		40.2288	0.034		40.3444	0.05748
73.8106	81.9211		69.071	90.2817		38.437	86.119														47.7013	0.06433		38.5526	0.03008		35.1424	0.03552
66.9902	81.4519		71.2674	84.1143		60.112	89.7002														54.2278	0.05881		43.1188	0.03603		34.391	0.03161
71.9032	82.7266		59.7652	88.8011		60.5744	77.4042														40.6285	0.04136		42.7142	0.03943		35.1424	0.0373
74.5042	83.4556		68.3196	84.6665		55.777	80.6971														50.3712	0.07064		41.7316	0.02885		43.35	0.03499
66.2966	80.7995		33.0616	88.4692		64.6204	79.6515														53.6231	0.05978		43.5234	0.02931		42.5986	0.04441
61.1524	83.073		75.8914	87.3552		53.6384	86.8871														42.1049	0.03876		45.0262	0.03458		35.0268	0.03281
62.4818	82.2866		67.626	84.3325		59.8808	89.1734														49.3446	0.04527		42.772	0.04151		38.4948	0.04659
67.1058	82.6783		57.511	88.2545		61.6148	88.2315														55.4239	0.04795		44.8528	0.04019		42.2518	0.0279
62.4818	82.2866		70.805	85.0537		60.979	83.1484														47.5701	0.052		41.5004	0.02634		36.2406	0.02926
67.1058	82.6783		61.0368	91.1418		58.7248	89.5991														50.0661	0.06489		43.7546	0.05061		38.8994	0.02974
69.9958	82.0008		82.943	89.5136		61.9038	86.8896														49.2954	0.05714		44.7372	0.06372		38.726	0.02587
64.9094	82.5029		58.089	88.8012		57.9734	77.4842														42.3861	0.03299		41.0958	0.03473		38.6104	0.04253
75.14	82.3461		62.3084	88.8381		66.8746	79.5553														57.8161	0.05653		37.7434	0.033		39.015	0.03998
69.8802	80.7496		36.3562	86.5461		52.7714	80.1074														50.1815	0.04086		42.8298	0.03973		37.0498	0.04422
76.3538	82.9028		88.723	87.5677		54.332	88.2832														49.9644	0.07179		46.0088	0.04102		35.4314	0.04909
65.9498	82.8653		86.8156	90.3442		66.9324	80.2146														45.758	0.06		46.7024	0.02871		36.0672	0.04356
78.8392	82.6508		54.1008	89.3068		54.91	81.5518														45.9082	0.05692		39.7086	0.03317		36.4718	0.04871
70.2848	82.293		71.094	90.5268		42.3096	87.3453														49.0492	0.06272		42.7142	0.04213		38.0324	0.02536
65.603	83.0856		62.0772	88.7775		49.6502	79.5867														65.1673	0.0761		38.8994	0.0352		39.3618	0.03857
73.695	81.0518		79.5328	86.9384		64.6782	80.7139														43.42	0.05199		38.6104	0.03342		42.5986	0.03241
68.8976	79.4552		67.626	85.1625		51.2686	82.7331														52.2245	0.05306		41.4426	0.02664		42.8876	0.03898
64.2158	83.0862		38.148	86.0928		46.2978	89.0436														40.2361	0.04215		40.5178	0.03346		38.0902	0.04092
72.3078	82.5648		72.8858	87.5365		51.9044	88.5924														46.3653	0.05852		35.6048	0.04312		36.9342	0.04026
64.6204	82.8573		73.4638	84.9095		46.0088	88.7364														46.6107	0.04099		47.4538	0.04386		45.084	0.05056
68.8976	82.1036		64.2736	89.5564		50.575	88.9832														57.5859	0.06831		42.0206	0.02466		36.414	0.03368
77.2786	84.0374		56.7596	90.2383		62.8864	88.2587														39.4052	0.0569		37.6856	0.03299		43.061	0.05635
59.3028	82.3908		75.5446	89.3971		47.9162	87.7045														45.8134	0.04898		39.5352	0.03189		36.2984	0.05925
68.3774	80.999		71.961	89.4998		55.3146	88.6078														67.9318	0.05914		37.57	0.03074		41.3848	0.04153
65.314	79.211		74.6198	90.1427		81.9604	89.2687														50.519	0.05359		43.5812	0.04664		36.3562	0.0417
63.58	82.8067		61.6148	88.5923		52.598	87.8829														36.1639	0.02339		43.061	0.04294		42.0784	0.04062
70.227	82.1913		54.621	89.8915		52.4824	89.1458														47.2342	0.05635		39.593	0.03496		40.8068	0.04016
68.6086	81.6549		66.0076	88.9317		66.0654	78.1833														57.8536	0.09982		36.6452	0.03762		36.0672	0.06518
65.4874	79.5973		62.3662	88.9887		54.332	89.5506														47.7642	0.07961		47.6272	0.03315		37.5122	0.02894
65.4296	81.3536		72.9436	87.9501		50.6328	87.678														46.6569	0.05307		38.0324	0.03487		41.0958	0.05456
66.4122	82.1323		68.4352	87.7164		45.8932	89.1457														52.92	0.07177		41.7316	0.02943		35.4314	0.03432
73.2904	82.1971		29.0734	86.7656		47.9162	89.2294														58.1648	0.05856		51.5576	0.05021		45.1996	0.06648
73.9262	79.3552		66.2966	88.9064		52.02	89.0895														53.7162	0.06782		50.7484	0.04272		39.304	0.05711
71.0362	81.8982		70.4004	88.3096		41.5004	87.8227														46.7252	0.05465		49.8236	0.03859		30.2294	0.03411
76.3538	82.5564		76.4116	83.5289		68.6664	89.9576														54.6251	0.06001		45.8932	0.07246		41.616	0.04764
76.8162	81.9941		69.5912	86.4399		40.5178	86.4673														50.1571	0.08064		41.327	0.02518		36.8186	0.03604
72.9436	81.6352		68.0306	88.3433		50.4016	80.292														49.9989	0.06492		38.437	0.02599		45.1996	0.05108
75.1978	80.2554		51.442	88.3478		57.8	88.811														52.6725	0.06576		46.529	0.03019		39.7086	0.04654
62.3662	82.3568		68.3196	90.4117		59.823	79.5227														44.638	0.04862		33.6396	0.03072		41.8472	0.04767
72.0188	83.2023		36.5874	88.4009		42.0206	87.0773														57.6025	0.06937		38.6682	0.04123		39.4196	0.02921
68.0884	82.2544		59.4762	86.8716		60.69	81.941														42.1168	0.04382		46.6446	0.04872		36.414	0.03545
61.6726	82.0601		68.4352	86.3145		51.3264	88.985														37.2952	0.03541		41.4426	0.02628		39.3618	0.0481
65.603	82.3545		66.759	88.2151		65.1984	81.2868														39.3924	0.04473		39.7086	0.03335		36.1828	0.05405
67.5682	82.1676		72.5968	89.3205		64.2158	79.2575														45.9956	0.05156		40.8068	0.02609		42.0784	0.04499
67.7994	80.945		59.5918	88.2085		53.2916	89.017														32.5723	0.01754		40.2866	0.03277		33.6974	0.03506
73.3482	81.7953		75.5446	88.4481		66.2966	82.0094														50.8119	0.05489		47.396	0.04816		30.8074	0.04677
67.337	81.8582		60.2854	88.5781		53.2916	82.7443														45.3261	0.05233		35.2002	0.03727		38.8416	0.04346
70.1692	81.2683		81.2668	90.177		51.153	89.0255														52.2702	0.05583		45.1996	0.04029		38.9572	0.04354
66.6434	82.1969		75.3134	90.3067		55.488	88.3258														49.0723	0.05982		39.9976	0.03322		42.7142	0.06685
67.1636	81.5458		52.7136	86.5219		77.163	80.8546														43.2199	0.06464		44.1014	0.03206		34.391	0.04554
70.0536	79.8348		60.5744	88.1242		67.9728	90.6445														51.6577	0.07655		39.6508	0.03296		35.547	0.03604
67.7416	83.17		62.1928	86.0207		56.1238	90.1761														46.133	0.06131		41.3848	0.03526		38.3214	0.06261
67.7416	83.17		69.071	87.0046		52.8292	88.4657														45.922	0.03666		39.6508	0.02978		37.1076	0.0591
64.9672	81.8935		67.7994	82.2956		62.2506	81.0188														45.4669	0.03991		45.6042	0.04524		36.7608	0.03431
62.2506	81.6812		52.887	89.4356		41.9628	89.7283														46.3353	0.05459		42.6564	0.02868		36.5874	0.02421
67.915	81.8725		60.401	89.1112		55.8348	80.8852														46.7662	0.05633		40.6912	0.03134		35.3158	0.03924
74.5042	81.9972		59.823	85.6047		72.4234	88.3862														51.1424	0.05751		39.882	0.0356		34.4488	0.03741
66.4122	82.295		57.0486	89.6708		63.6956	79.4527														41.4908	0.04482		41.5004	0.02854		37.1076	0.03582
65.025	80.8676		87.5092	91.2625		50.8062	90.1252														49.5676	0.06189		42.0206	0.03962		38.5526	0.04397
73.5794	81.9479		87.1624	85.1589		53.465	81.2722														46.0914	0.06614		43.4656	0.03701		38.0902	0.0231
70.4004	81.8429		103.289	90.0489		90.5148	90.804														46.4878	0.07084		43.4656	0.03701		43.6968	0.03916
73.5216	81.2249		66.6434	89.819		51.2108	89.0919														40.6971	0.05409		43.0032	0.02354		35.836	0.03325
70.4582	82.8746		38.3214	86.991		68.3774	81.0824														49.6591	0.05446		41.6738	0.03089		37.57	0.02662
60.112	82.8796		34.2176	84.9057		61.0946	89.3272														40.8969	0.05497		44.2748	0.0499		37.57	0.03308
63.58	81.8254		74.9666	82.9545		54.7366	89.5105														48.2861	0.06579		46.0088	0.03465		41.038	0.02971
73.695	81.1021		64.736	89.617		54.6788	80.8458														42.4424	0.04974		44.5638	0.03452		39.593	0.05664
71.961	81.1334		35.6626	86.9018		54.5054	79.5636														43.7356	0.05447		39.9976	0.02458		37.9746	0.03433
73.8684	81.8941		40.8646	87.0683		73.984	89.3143														46.0185	0.03914		37.8012	0.02873		40.4022	0.03538
66.3544	82.689		35.6048	86.938		70.3426	85.1214														48.5689	0.06207		34.7956	0.0206		35.3736	0.03713
71.0362	80.4107		64.0424	89.9652		58.089	81.8818														57.0435	0.05004		39.9398	0.03566		32.079	0.04389
73.8106	82.5431		74.562	89.7635		45.7198	87.6925														49.7948	0.05203		43.4078	0.04769		36.5296	0.03193
67.7994	81.258		75.3134	90.1441		70.0536	88.6614														50.2643	0.05083		38.437	0.02354		36.2984	0.0291
70.2848	82.4994		42.8298	86.9701		35.4892	86.4502														45.3324	0.05452		44.795	0.03704		39.4196	0.05018
73.9262	82.0729		62.5974	88.1659		58.8982	80.0591														56.5138	0.0572		43.061	0.04234		34.9112	0.01736
74.273	83.1745		60.1698	88.5547		65.7186	78.9841														46.75	0.03963		31.9056	0.01825		38.437	0.06398
70.4004	83.5508		61.557	88.4285		57.222	88.2772														40.0032	0.05596		39.882	0.03602		49.4768	0.06205
78.2034	80.9188		75.429	89.4881		48.7832	87.3741														35.4254	0.04419		44.795	0.03704		37.6278	0.03158
75.2556	80.8923		72.7702	90.3229		62.7708	80.7626														48.4948	0.06121		39.9976	0.02986		36.3562	0.03695
74.9088	82.578		63.7534	88.787		57.1064	79.3317														47.7193	0.0524		41.616	0.03032		42.483	0.02936
71.094	80.8501		72.3078	88.8109		59.7074	81.4261														37.3142	0.03971		39.6508	0.0325		41.4426	0.04897
65.314	81.4191		68.1462	88.6111		37.1076	87.5805														46.1379	0.05687		43.1766	0.03308		37.1654	0.04852
62.5974	83.4052		71.6142	84.8976		71.0362	81.8708														50.9117	0.05617		42.5408	0.03276		42.483	0.0455
61.7304	82.347		75.2556	90.2464		48.0896	89.3541														47.9214	0.0495		39.304	0.04875		37.3388	0.07013
72.25	82.5549		86.5844	87.2347		55.0834	89.2073														51.0536	0.06106		43.6968	0.03665		33.8708	0.02298
66.5278	81.4103		72.3078	88.254		64.5048	81.0065														51.8866	0.04328		38.2058	0.03983		40.3444	0.05354
67.9728	82.6881		94.214	87.7953		59.4184	82.8327														49.5698	0.05456		45.1996	0.02977		39.7664	0.0576
67.7416	82.5574		51.6154	87.5154		67.2214	87.4013														68.0831	0.07458		37.281	0.04112		42.5986	0.03728
75.0822	80.8544		53.0604	89.1197		73.0014	90.2843														46.947	0.05291		40.6912	0.02397		37.9746	0.04055
68.0306	82.8642		59.0138	86.4413		56.8174	89.126														45.0244	0.02488		42.483	0.04332		47.8006	0.05586
74.2152	80.5507		57.9734	88.3706		55.6614	87.8769														46.6672	0.0505		47.8584	0.03969		35.836	0.04031
73.8684	79.599		58.8404	89.9369		67.5682	80.0147														40.5234	0.0321		40.1132	0.0392		40.0554	0.0556
73.1748	81.2418		100.167	90.122		66.5278	89.041														52.3147	0.04017		43.2344	0.04128		40.0554	0.06996
58.089	83.4355		76.007	89.3023		61.3258	79.0217														51.8633	0.04554		38.8416	0.02292		38.2058	0.06483
76.585	81.3246		66.47	90.183		55.3146	82.538														43.8287	0.03371		36.8186	0.02994		39.3618	0.04247
77.2208	82.8166		78.7236	89.7051		45.0262	89.1541														66.8286	0.06986		37.6856	0.03702		37.2232	0.01894
67.048	82.3562		66.5856	87.1203		50.9218	88.2284														45.121	0.05284		46.2978	0.04439		38.7838	0.04073
70.1692	81.6137		63.2332	83.7845		60.0542	89.7517														41.1171	0.04883		39.2462	0.02351		39.6508	0.03796
68.4352	81.5464		57.8	88.5739		55.0256	80.3772														61.9843	0.06094		35.8938	0.03843		38.8416	0.03943
71.6142	81.2441		33.9864	87.5031		65.4296	80.4832														53.735	0.07336		43.1188	0.03915		40.2288	0.02919
76.8162	79.6192		33.2928	87.409		48.1474	88.5518														49.5645	0.06516		42.2518	0.02981		39.882	0.04879
67.337	82.1576		69.7068	88.9073		52.2512	88.6054														46.9076	0.06791		47.5116	0.02978		40.46	0.0303
80.053	82.6492		74.0996	85.9346		48.4364	87.8034														50.9943	0.0553		37.0498	0.02473		40.9802	0.05297
73.2326	80.1776		65.1984	82.7244		59.7074	89.859														65.071	0.06204		41.4426	0.03764		35.3158	0.06201
65.4874	82.9872		60.401	88.2809		39.1306	88.3018														43.5519	0.04457		34.391	0.03558		41.7894	0.04185
66.0076	82.3303		81.0356	84.3675		75.6024	88.8795														45.0236	0.06216		43.5234	0.04434		35.547	0.03411
74.6198	81.5962		54.3898	90.7307		68.7242	88.9398														45.6718	0.04012		44.3326	0.03736		34.5066	0.04966
69.7646	82.4801		73.2326	86.9095		60.7478	81.9217														41.8837	0.04152		40.9802	0.04405		41.7316	0.04193
67.6838	81.1782		70.7472	89.82		51.3264	89.1108														43.5882	0.05395		43.1766	0.03428		39.0728	0.04927
71.2096	81.1656		59.823	86.5161		77.9144	89.1277														47.3398	0.05856		39.1884	0.02977		34.2754	0.03034
69.5912	83.5778		32.8882	85.7737		46.9336	86.0619														51.3497	0.03942		48.7254	0.03398		41.2692	0.02772
72.828	81.9397		86.1798	86.9335		76.3538	89.0553														48.8364	0.06233		36.6452	0.02749		46.24	0.06982
69.1866	82.2184		86.5844	86.1211		87.1046	90.42														43.1965	0.0647		42.194	0.03074		41.2114	0.0668
74.7932	82.1762		41.7316	86.5324		65.6608	81.262														52.9206	0.06076		43.8124	0.03364		41.7316	0.05292
73.4638	82.0137		75.3712	88.9839		63.4644	90.7288														41.304	0.06554		41.6738	0.05286		37.8012	0.05883
69.36	82.1415		64.2736	87.2164		55.6614	78.1191														43.8896	0.0632		46.0666	0.05283		38.4948	0.03016
67.5104	80.8743		66.47	89.6104		58.667	88.9555														42.801	0.06386		49.5346	0.0295		32.7148	0.02744
80.1108	81.923		67.6838	85.1957		53.9852	79.3013														46.2195	0.05404		33.4662	0.01592		38.8994	0.03738
69.7068	81.7149		33.0038	84.3387		67.4526	90.5018														51.5289	0.05583		37.0498	0.03064		38.4948	0.05345
68.5508	82.0042		63.2332	89.4681		61.7304	79.4589														43.1335	0.05684		52.02	0.03532		32.8882	0.04188
72.539	81.452		76.0648	81.7609		70.6894	82.5909														50.6503	0.06121		41.7894	0.02576		36.2984	0.03758
68.3196	82.0967		54.621	89.6547		53.8696	78.4094														63.2989	0.06136		41.7894	0.03997		35.2002	0.02815
67.626	80.6622		38.8416	87.3113		64.736	78.9891														44.8028	0.04965		40.0554	0.02687		36.8764	0.04717
66.5856	82.563		68.6664	90.0635		37.5122	86.8534														42.3175	0.03938		39.4196	0.03123		35.7782	0.05609
70.227	81.7222		52.309	87.0431		51.0952	89.2464														44.0213	0.05793		40.8068	0.0449		36.703	0.03787
75.0244	81.7825		64.0424	89.3203		55.0834	89.2672														53.4112	0.06112		40.8068	0.0449		40.5178	0.05559
66.9902	82.3205		65.6608	88.941		65.6608	82.5129														60.6753	0.06134		40.6334	0.0367		38.2058	0.04173
70.4582	81.0035		71.4986	84.8042		63.6956	80.3551														49.6198	0.06074		41.905	0.03002		36.2406	0.04825
73.7528	81.7062		81.8448	83.3443		44.9684	87.1981														45.7469	0.07086		39.9398	0.05011		40.1132	0.0409
77.163	80.976		84.966	90.9311		54.2742	89.4094														47.7766	0.04432		39.304	0.03613		37.3966	0.0389
77.5098	80.9176		48.2052	87.134		52.598	90.4758														51.2265	0.0626		33.813	0.02819		37.7434	0.04358
68.7242	82.1907		77.3364	86.4693		51.9044	84.2515														42.3296	0.06131		45.662	0.03612		39.8242	0.04174
68.204	82.0772		68.4352	89.3532		58.2624	83.19														51.3762	0.05222		38.2636	0.03455		34.68	0.0304
69.5334	82.4123		74.9088	84.3373		61.7304	81.2554														46.0877	0.07168		42.772	0.03624		34.102	0.03139
79.764	81.5149		64.1002	88.6821		42.1362	87.2197														46.1932	0.05521		52.7714	0.042		36.4718	0.03741
79.3016	80.8035		71.094	88.2533		63.9846	78.4483														53.787	0.05884		47.107	0.04847		37.3388	0.03888
64.9672	81.0168		62.8286	88.0314		48.552	89.4186														43.1356	0.04587		33.4084	0.02656		45.662	0.05403
73.2326	80.8601		66.0654	89.825		46.0088	88.9762														53.3734	0.04771		40.8068	0.03529		38.7838	0.04383
72.0188	80.0816		60.2854	89.3554		56.7596	81.6197														61.5254	0.05554		43.5234	0.03769		40.0554	0.05285
64.736	81.8186		64.5626	87.6158		49.8814	88.5247														46.3708	0.04446		43.928	0.04771		38.7838	0.03156
64.5626	80.9736		80.3998	89.6373		61.846	90.2722														44.7826	0.05104		47.8006	0.04095		40.9224	0.03128
61.557	82.109		54.1008	86.6173		67.2792	90.196														39.3905	0.04718		43.1766	0.05572		37.3966	0.03227
67.9728	81.9011		46.4134	89.0014		59.245	82.3446														47.7603	0.05501		39.4196	0.03193		38.2058	0.03342
67.6838	80.4763		57.5688	88.4665		58.5514	81.6187														40.3559	0.04491		36.7608	0.03701		44.2748	0.03748
63.8112	82.0416		66.0076	90.3805		43.2922	88.1716														42.2032	0.03302		36.8186	0.02483		39.0728	0.04172
64.1002	80.9204		95.1388	90.2247		57.6844	88.4718														46.9824	0.04471		37.3388	0.02991		37.7434	0.03915
74.7354	82.2363		85.6596	89.9444		56.644	89.1672														42.3628	0.04863		41.7894	0.03181		43.061	0.02262
73.117	80.3795		70.4004	85.0001		45.7198	87.4509														46.7292	0.04563		43.4078	0.03497		40.2866	0.0493
73.9262	81.2515		77.1052	82.5499		69.5912	79.262														61.8044	0.05069		42.6564	0.03417		37.7434	0.01895
65.0828	83.0533		70.1114	87.0376		56.644	89.5273														58.2794	0.05026		35.9516	0.02848		36.4718	0.03422
65.8342	81.8811		75.2556	90.2768		49.8814	89.1444														50.315	0.0576		38.437	0.0208		37.3966	0.04282
74.3886	80.764		47.7428	88.4964		62.5974	80.6138														47.4652	0.06502		47.9162	0.0447		37.9746	0.03656
75.6024	79.824		80.4576	85.9686		64.8516	80.5197														45.8379	0.04872		44.0436	0.05318		39.1884	0.03291
68.204	81.7706		69.0132	89.1945		54.043	88.8961														47.214	0.06059		41.4426	0.03678		32.4258	0.04066
70.5738	81.8678		80.92	89.2998		54.332	88.2105														40.1965	0.05217		44.0436	0.05318		43.1766	0.04829
73.3482	80.7134		52.598	88.6302		48.263	88.2811														45.4498	0.05068		41.4426	0.03678		40.6334	0.02158
73.3482	80.7134		48.1474	88.961		65.1406	79.6322														57.279	0.05899		41.5004	0.04		35.3736	0.04375
79.8796	81.7085		84.0412	86.7813		75.14	89.7532														47.3006	0.05202		36.703	0.03048		35.4314	0.02498
79.8796	81.7085		43.639	87.714		46.6446	89.036														43.0068	0.05029		40.9224	0.04272		41.0958	0.04609
67.4526	82.4483		69.1288	89.5087		73.5216	88.0347														44.4055	0.07481		44.506	0.03919		47.107	0.05565
72.539	83.2352		35.7204	86.5696		59.534	80.5667														47.2116	0.05866		38.7838	0.03024		34.969	0.02838
77.741	82.5506		67.4526	85.7823		58.1468	82.2014														44.9222	0.04569		48.2052	0.04194		38.2058	0.02662
70.805	81.6975		55.0256	89.1861		61.2102	90.0189														47.3788	0.04847		39.1884	0.03004		36.125	0.03607
62.1928	83.0111		73.406	86.2882		57.2798	82.0373														30.1631	0.02922		41.2114	0.03009		34.5066	0.04845
61.4414	83.8258		69.649	86.6821		61.0946	81.3091														46.2017	0.04878		38.0324	0.02807		41.7316	0.04554
60.112	82.518		42.2518	87.1479		47.6272	87.9725														42.6244	0.03663		43.928	0.03136		34.102	0.03953
73.117	81.2477		92.2488	86.5989		58.956	88.2455														51.0569	0.04775		49.8814	0.03465		41.1536	0.03941
70.805	81.4896		33.1194	85.004		37.2232	86.6559														50.4761	0.05197		43.9858	0.03502		25.3742	0.03677
81.6136	82.5994		63.4066	85.6781		62.4818	78.8936														29.9873	0.01318		39.8242	0.02453		35.0268	0.03627
81.2668	81.5688		60.2854	88.257		58.5514	89.3555														45.5173	0.04751		40.8068	0.0418		38.8994	0.01237
66.8746	82.572		84.7348	89.7962		61.846	80.1468														48.6079	0.0467		39.5352	0.03658		35.4892	0.05509
65.7764	82.574		73.117	89.9616		58.378	90.1659														43.5828	0.05892		39.4774	0.03225		33.2928	0.04238
63.4644	80.4309		61.9616	87.3959		60.3432	81.449														43.5302	0.03453		43.1188	0.02975		34.2176	0.03193
67.3948	81.1096		68.0884	89.916		52.5402	89.2556														48.5391	0.08329		43.8124	0.03548		40.6334	0.02857
71.3252	80.6567		63.3488	88.879		41.616	87.3968														48.5483	0.04011		48.4942	0.02901		39.015	0.05554
69.2444	80.6978		60.0542	88.1108		63.291	79.7795														42.6604	0.06392		43.1766	0.02894		35.8938	0.06125
73.117	81.0654		70.4582	90.5968		45.0262	88.3731														47.8639	0.06633		42.194	0.04038		29.9982	0.0279
68.204	80.3569		39.3618	87.5825		45.4308	87.838														49.3434	0.0415		44.9684	0.0358		35.0846	0.03707
69.4178	81.6571		73.0592	89.817		64.6204	74.0597														46.604	0.05748		45.4886	0.04054		35.8938	0.02861
73.1748	81.3614		62.135	86.9134		62.2506	82.1027														45.6674	0.06759		40.5178	0.02521		33.235	0.01229
68.6664	83.0163		68.3774	86.4154		52.7136	89.4965														52.1526	0.05279		40.2866	0.03591		40.5178	0.04616
69.7646	81.4147		61.7882	82.4125		48.4942	88.7156														40.275	0.04692		42.483	0.04532		36.7608	0.04376
65.9498	82.8387		68.204	89.7593		55.4302	87.8232														40.58	0.04882		36.0672	0.02259		40.8646	0.03874
70.805	82.0477		66.6434	90.2694		49.9392	87.6974														42.1219	0.03103		33.7552	0.02136		40.3444	0.06411
73.8106	82.5034		79.1282	90.5164		50.9796	89.2017														45.3031	0.05991		51.3264	0.04145		39.7086	0.03614
69.0132	83.4924		89.2432	88.9317		56.7596	89.4126														46.8022	0.04869		39.3618	0.04436		35.7782	0.02551
69.0132	83.4924		37.4544	85.3026		65.4874	79.8691														46.6847	0.04662		43.2922	0.04683		40.8646	0.04215
63.8112	81.2838		90.168	82.8418		47.8584	88.8735														45.6148	0.05863		46.4134	0.02883		39.2462	0.06059
78.3768	79.2569		66.1232	88.4615		35.547	85.0078														46.7858	0.05665		38.0902	0.03024		35.9516	0.03052
68.204	81.9908		68.5508	87.9621		87.0468	81.6699														44.2188	0.06573		48.0896	0.04703		39.015	0.04478
74.4464	80.672		74.3308	87.5309		56.8752	80.9618														40.1054	0.03856		38.0324	0.02812		39.593	0.0457
68.3774	81.7011		64.3892	85.801		58.8404	89.4861														48.6969	0.05054		40.4022	0.02747		37.57	0.04176
75.718	81.8304		37.8012	87.7862		40.0554	89.3246														37.5382	0.05268		51.4998	0.03528		40.8068	0.0296
67.7416	83.2662		59.5918	88.6321		50.864	89.5237														49.0305	0.04865		41.7316	0.04185		38.726	0.04612
62.8286	80.906		63.8112	90.2688		66.7012	81.5643														45.7083	0.04972		46.1244	0.02306		42.4252	0.04826
65.3718	82.5781		70.6894	89.6879		57.4532	78.5979														44.9458	0.04206		44.3326	0.032		34.5066	0.06108
65.3718	81.2158		73.5794	89.7744		65.1984	80.2449														45.7932	0.05886		44.3326	0.032		31.501	0.02032
75.6602	81.1387		68.5508	84.8142		66.2966	90.1004														38.5735	0.04698		39.4196	0.03722		44.6794	0.03316
75.8336	80.5767		89.301	89.3467		50.864	89.5774														42.6442	0.04376		39.4196	0.03722		31.79	0.04872
65.603	82.9209		61.9616	89.7756		64.447	90.9767														46.9681	0.05168		36.125	0.02813		36.703	0.05506
72.1344	81.6849		75.0822	89.2925		64.5626	86.965														42.9064	0.05362		42.483	0.02805		36.2406	0.02937
80.92	80.9812		68.204	88.3287		56.1238	82.1988														46.8494	0.04218		47.4538	0.03477		38.5526	0.02717
74.0996	83.0129		66.2388	88.7431		46.8758	88.8276														47.3441	0.07017		44.0436	0.03118		33.5818	0.0442
68.0306	81.9835		67.337	89.3076		42.194	87.3072														44.6583	0.06395		41.327	0.03726		36.0094	0.05837
68.0884	80.6428		61.7304	88.9865		54.332	88.04														47.2916	0.05628		56.0082	0.04172		44.795	0.05615
67.337	80.0631		101.844	87.9689		68.5508	80.0976														44.7212	0.04662		30.2294	0.03274		36.9342	0.03112
68.4352	80.4615		72.828	87.4612		42.772	88.6493														63.9575	0.06518		38.3792	0.03005		38.5526	0.03163
68.4352	80.4615		77.6254	88.7372		63.58	89.6817														45.0684	0.04733		49.0144	0.03491		43.9858	0.05453
72.7124	80.9035		52.9448	90.322		53.0604	81.0588														45.2087	0.04274		35.0846	0.0355		40.3444	0.07046
63.2332	82.289		54.7366	88.1958		55.1412	89.97														49.1341	0.04625		43.928	0.04463		41.616	0.04155
65.603	81.041		48.9566	89.8532		85.3128	88.4561														47.832	0.05711		44.217	0.03467		35.6626	0.04426
72.1922	81.9407		48.6098	87.8542		46.0666	87.6659														50.3254	0.05928		52.3668	0.0425		41.038	0.02553
79.3016	83.3844		69.4756	89.4405		62.5396	89.9584														52.5365	0.05857		37.2232	0.0232		38.0902	0.04406
59.7074	83.2887		61.4414	89.699		63.58	89.4384														50.4094	0.04825		47.396	0.03649		34.0442	0.03003
64.5626	81.2148		72.7702	87.013		64.9094	89.8766														49.8095	0.05088		41.038	0.04084
83.9256	83.3419		70.1692	85.2201		56.5862	79.1384														47.019	0.04154		43.1766	0.03462
63.2332	82.9321		66.2388	89.5107		58.7826	81.3588														45.2691	0.05981		35.0846	0.03017
66.1232	81.0447		62.0772	86.904		74.1574	89.4691														49.8671	0.05498		44.8528	0.03269
71.1518	81.3067		62.7708	85.4028		64.7938	91.6333														43.982	0.05714		36.9342	0.03069
59.3028	82.1757		78.897	87.4874		60.8634	81.1697														39.3695	0.05111		40.4022	0.02677
78.6658	79.5393		37.6278	86.7707		59.534	82.0922														43.1955	0.06165		39.015	0.02588
70.5738	83.241		57.8	88.9212		65.5452	91.4305														46.6461	0.07401		35.0268	0.0368
66.7012	82.8565		66.181	90.3739		52.4246	89.097														42.3774	0.05908		42.5986	0.04902
65.8342	81.3482		59.3606	89.5935		37.8012	86.7609														46.2956	0.05429		43.4656	0.02998
65.1984	81.777		68.2618	87.8647		65.6608	79.9082														47.5791	0.0504		43.7546	0.04085
66.7012	82.5134		66.181	88.1597		67.2214	79.9496														46.21	0.05187		38.2636	0.04453
73.695	83.2103		59.1294	88.1286		51.2108	89.6642														48.1666	0.05333		44.4482	0.03682
74.851	81.4462		67.6838	81.8076		61.557	80.8139														44.1481	0.0297		40.5756	0.02895
74.6198	80.8363		68.0306	87.6454		64.5048	81.6063														40.31	0.03955		46.7024	0.05259
63.6956	82.4		67.915	88.2035		56.066	82.3752														46.433	0.05138		44.5638	0.05035
65.0828	82.5637		38.8994	87.3768		58.089	82.1182														48.02	0.04897		41.0958	0.05044
67.337	81.3948		60.1698	88.6951		47.2804	88.939														45.1602	0.04187		45.1996	0.03107
77.1052	81.3761		61.9616	89.4162		50.4594	88.6149														44.7471	0.05478		45.1418	0.02494
68.9554	82.1515		72.0188	88.4918		78.319	89.102														43.1812	0.06772		48.7254	0.03333
74.6198	82.6		66.7012	88.9524		58.2046	89.5232														50.4256	0.04297		38.3214	0.02628
74.0418	82.2705		80.1108	88.8629		67.915	80.2778														59.6997	0.05042		51.442	0.03116
75.0822	81.6163		50.0548	88.611		75.429	78.4547														48.4974	0.04831		39.5352	0.03762
60.979	81.4592		67.6838	88.7028		53.8696	88.6074														55.9374	0.06277		45.662	0.04473
73.695	82.0751		68.5508	88.3075		68.0306	89.0068														44.9155	0.05038		43.5812	0.05337
64.8516	82.1169		79.4172	83.6331		57.2798	79.3635														44.2358	0.04861		39.1884	0.02963
69.0132	83.9066		70.9206	87.1079		56.8174	89.1135														54.2841	0.06346		49.0722	0.03652
59.245	82.5963		65.4296	89.701		49.1878	89.453														44.359	0.05285		39.304	0.0292
68.4352	82.5576		43.7546	86.5964		49.8236	87.8655														47.1107	0.06532		44.506	0.0484
70.6894	84.4646		61.3836	87.9226		58.8404	80.4316														47.193	0.05848		38.0324	0.02701
72.7124	83.9498		72.1344	91.162		61.9038	90.4621														42.4472	0.04298		45.7776	0.04657
74.562	81.1487		62.424	88.1493		45.7198	87.8199														45.7188	0.05234		37.57	0.03055
63.7534	81.2589		70.6316	90.4877		57.2798	80.0324														34.2253	0.02288		35.6048	0.03861
59.4184	79.391		61.7304	86.8483		47.4538	88.1061														50.117	0.04862		35.6048	0.03861
71.4408	82.4347		42.772	89.0077		50.4016	88.9147														54.1405	0.06267		36.5874	0.03779
70.9206	81.8421		51.153	86.9514		58.667	81.7157														51.2505	0.05238		45.084	0.05072
74.6776	81.328		66.5856	85.8519		50.1704	90.0261														51.3406	0.03843		39.7086	0.03388
74.6776	81.328		61.1524	89.6557		61.6726	90.2237														45.7692	0.05086		40.171	0.03342
66.1232	83.9155		65.5452	85.4223		40.2866	88.4597														45.1466	0.05779		37.8012	0.04462
66.5856	83.1579		69.5912	88.3283		48.6098	88.1524														42.3683	0.04399		33.0038	0.0362
70.4004	80.6412		69.4178	88.6364		70.6316	89.8915														44.5156	0.04763		43.639	0.03389
68.3774	81.3717		54.9678	87.2748		32.079	86.9474														48.7856	0.04894		44.0436	0.03094
70.4004	80.6412		74.6198	83.3934		37.6856	85.5404														49.9801	0.03961		36.8186	0.02586
68.3774	81.3717		55.1412	84.7027		36.4718	88.6935														49.8029	0.05226		35.0268	0.03009
69.5334	82.0086		57.1064	88.9224		71.6142	89.2327														47.076	0.06081		41.327	0.02992
71.9032	82.6243		67.048	86.6953		66.1232	90.3619														45.5504	0.05285		46.9336	0.03635
69.071	82.0044		69.3022	90.7786		63.4644	90.4908														40.849	0.06973		36.8186	0.03439
72.5968	81.6433		77.0474	88.6749		63.4644	90.4908														50.5864	0.08841		37.6856	0.02736
67.9728	83.0255		69.8802	81.2256		55.7192	88.2203														46.7955	0.07813		39.2462	0.02128
77.1052	82.0503		75.718	81.1365		45.7776	88.4089														44.0396	0.06433		45.084	0.03651
70.2848	82.0251		63.58	89.6917		94.9076	90.2868														45.9132	0.05004		41.2114	0.0267
70.0536	81.0936		67.048	88.8389		63.7534	82.4652														47.9849	0.07141		35.0846	0.03498
66.47	82.4681		91.6708	89.5459		44.506	88.7304														41.452	0.04938		37.4544	0.02951
72.0766	81.7848		68.204	87.8492		56.9908	89.7464														41.7088	0.04821		34.7378	0.03436
84.099	82.3075		56.1816	84.9854		57.6844	88.4358														41.0818	0.0518		34.7378	0.03315
82.4228	81.3532		77.6254	87.667		48.7832	88.5974														52.9231	0.05471		44.1014	0.04626
74.6198	81.1695		63.1754	88.5841		62.8286	80.3996														53.7277	0.06074		41.8472	0.03002
75.14	81.6834		39.6508	88.2616		65.3718	89.9414														49.7178	0.06123		43.2344	0.03608
64.447	82.1996		75.7758	90.0478		57.222	88.2294														48.2355	0.07326		53.5806	0.04532
73.4638	80.6523		79.3016	89.9008		65.4874	81.4065														46.0472	0.05003		41.0958	0.05504
71.5564	80.6131		33.4084	84.9526		37.1654	83.1144														49.4657	0.06405		39.1884	0.03565
65.4874	82.1213		63.9268	89.6037		50.1704	84.6339														47.7236	0.05898		37.8012	0.03394
75.8914	83.1215		74.7932	87.7767		55.2568	88.6722														40.4737	0.04345		47.685	0.03171
72.25	82.4315		61.3836	88.6171		60.9212	81.485														42.2158	0.05177		44.5638	0.02382
79.4172	79.6121		61.0946	90.1214		52.3668	79.8631														48.689	0.05475		29.4202	0.0305
75.8914	80.2983		69.8224	85.2301		56.5284	80.058														41.8641	0.04709		40.8068	0.0358
66.9902	82.1953		67.5104	88.7302		47.974	89.4442														44.8146	0.04433		39.4774	0.03652
71.7298	81.9743		50.6906	89.0441		55.6036	89.5705														44.505	0.04463		37.1076	0.02624
66.7012	81.2962		65.1406	90.004		49.5924	87.6958														49.4133	0.05808		44.8528	0.03719
71.6142	81.509		52.7714	88.3521		61.1524	81.1359														52.0329	0.04803		38.8994	0.0276
70.227	83.4044		35.9516	87.603		54.5632	88.2273														47.4154	0.04246		49.6502	0.05706
72.5968	80.7634		61.9616	90.3701		59.1872	80.8462														45.1148	0.04933		42.8876	0.03265
61.7882	83.0341		65.2562	87.9641		41.905	88.9981														48.1123	0.07707		46.7602	0.03895
75.1978	82.2068		84.966	81.7517		38.8994	87.9783														47.6582	0.05793		39.304	0.02889
74.562	81.2658		54.332	88.4278		59.9964	89.7953														48.4822	0.05016		47.1648	0.06247
80.5154	81.3932		70.8628	88.1212		53.8696	88.2583														54.0667	0.04255		43.061	0.0323
63.1176	82.9717		67.1636	88.8797		89.1854	90.2652														47.775	0.05961		38.8994	0.02788
76.4116	81.7833		61.557	88.8832		40.8646	88.723														45.8167	0.06809		43.928	0.0354
80.4576	81.3841		34.2754	84.7849		53.754	88.2189														44.8575	0.04825		46.529	0.04276
64.736	83.4742		65.8342	85.9946		56.0082	89.0054														45.4322	0.05297		44.9106	0.05009
73.8106	80.9782		63.0598	88.1431		52.8292	88.3499														40.4481	0.03503		43.35	0.0265
64.3892	81.5636		64.736	85.6252		52.598	88.7179														49.2234	0.0541		47.3382	0.0348
69.7068	82.2356		67.2214	89.8578		48.841	88.6295														40.1912	0.04629		43.5812	0.02278
63.869	83.0718		39.882	88.0405		42.9454	89.1197														47.7495	0.05543		34.1598	0.03486
62.2506	81.7594		68.1462	90.2364		63.9846	73.1005														45.7913	0.03384		44.3326	0.03453
73.0014	81.9523		76.874	88.7724		61.557	82.7928														42.6191	0.04741		37.6856	0.02804
62.713	81.964		48.3786	88.3759		44.9684	81.9462														43.9509	0.06207		31.1542	0.03721
73.5216	82.5359		85.255	90.9664		60.9212	81.5406														57.0866	0.04501		40.5178	0.03424
67.8572	81.8709		80.2264	85.9606		45.373	88.72														39.5804	0.05083		41.5582	0.03939
77.1052	80.9327		73.8684	87.3313		52.1934	89.0355														51.0963	0.07703		41.5582	0.03939
71.9032	80.1002		54.1008	89.3939		51.7888	87.5317														50.4745	0.05453		44.9684	0.03972
73.0592	82.1414		72.828	87.9373		98.3756	83.5822														46.8018	0.05857		40.4022	0.03097
66.9324	81.6898		78.6658	89.6598		62.3084	89.051														49.5359	0.0507		39.593	0.02225
70.1692	83.452		51.0374	88.1908		63.002	80.7036														42.7223	0.03254		41.7316	0.03496
76.007	79.7579		74.7354	83.3778		56.8752	82.7984														43.5813	0.05454		36.7608	0.03512
73.4638	80.3741		65.314	88.6539		53.5806	82.2613														47.3443	0.0432		47.396	0.04844
69.7068	79.7293		56.7596	87.9706		54.2742	89.1996														49.0165	0.04814		36.125	0.02719
68.1462	80.7903		63.7534	89.1251		63.58	89.1636														37.756	0.0297		39.882	0.02649
68.5508	81.6675		60.4588	88.802		75.429	90.2426														37.8553	0.03279		45.373	0.02671
70.4582	81.5195		69.1866	89.9847		57.7422	90.2837														43.3834	0.03005		46.0088	0.03206
65.314	83.0763		57.4532	88.7975		64.1002	89.4361														49.4642	0.06486		32.2524	0.02698
68.2618	81.5226		57.8	89.1783		66.5278	79.1417														44.4731	0.05358		38.6104	0.03449
70.3426	81.2825		37.9168	87.0204		55.1412	88.2536														42.1678	0.04027		40.6334	0.0355
57.7422	81.5839		59.4762	88.1797		60.3432	91.0336														46.2068	0.04669		34.8534	0.03318
72.25	81.7864		68.4352	87.7686		64.6782	81.9172														47.7449	0.0518		39.8242	0.03041
69.9958	80.886		68.0884	87.8844		65.7764	81.7985														37.3809	0.04854		43.35	0.04653
69.4178	81.6547		29.9982	85.2937		54.9678	90.3883														45.9762	0.04374		44.8528	0.04002
83.8678	81.0477		68.1462	85.149		65.1406	87.5656														43.8837	0.04567		40.5178	0.03587
63.6378	80.6715		67.5104	88.4908		56.5862	81.4332														45.544	0.05243		30.9808	0.02188
67.048	80.257		64.1002	89.2136		57.1064	88.5655														50.0284	0.06331		42.0206	0.0333
63.7534	82.2783		39.304	86.7554		59.4184	89.7892														51.2542	0.05353		50.1126	0.04033
67.4526	81.4394		75.14	89.8844		58.5514	88.7392														49.2545	0.0583		41.9628	0.03309
63.3488	82.243		57.6266	88.2072		33.1194	85.3177														31.13	0.0007598		37.6856	0.02158
64.2158	81.246		59.7074	88.36		80.2264	90.5539														40.9277	0.04724		42.8876	0.04098
76.007	82.3645		74.0996	90.029		82.076	88.6011														50.2233	0.05428		38.726	0.03762
65.1984	83.9474		62.713	89.0987		44.8528	80.7601														51.8633	0.0596		50.0548	0.0385
66.47	81.8461		79.1282	88.905		81.787	81.8421														46.9914	0.06287		42.8298	0.03035
66.4122	82.5356		69.7646	87.5136		54.7944	78.9143														55.1412	0.05201		36.3562	0.03843
67.2214	81.8382		43.35	86.9514		56.355	82.333														36.703	0.05713		51.442	0.04075
76.9896	80.5171		52.3668	87.5966		49.4768	88.7695														40.2288	0.03577		40.8646	0.03088
62.2506	83.377		107.508	88.1384		94.4452	90.147														46.9914	0.06287		40.3444	0.03735
69.8224	83.6549		67.6838	88.6727		40.8068	85.3465														45.1996	0.05158		51.2108	0.03973
74.1574	81.2783		76.9318	86.1792		53.0026	89.6279														40.2288	0.03577		40.4022	0.04381
67.337	81.9138		68.0884	90.8966		77.8566	90.0981														44.9106	0.0422		38.2058	0.03308
68.2618	82.4659		64.9094	78.7533		54.5054	89.9719														48.4364	0.05947		43.0032	0.03958
62.3662	81.1388		75.9492	90.7945		66.4122	89.9231														49.7658	0.0578		43.0032	0.05979
72.6546	81.2847		66.1232	89.7186		65.8342	90.0915														53.6962	0.06806		52.1934	0.04481
72.6546	81.2847		55.7192	89.0796		51.0952	88.8361														43.1188	0.05471		39.7664	0.0236
66.2966	81.4135		76.1226	88.7598		66.3544	89.5155														45.373	0.04156		44.5638	0.02465
73.3482	80.5359		53.5228	87.7699		42.9454	87.0353														47.6272	0.0837		35.7782	0.03614
68.204	82.0746		77.452	88.7228		51.153	89.0343														50.0548	0.05206		54.043	0.04721
68.3196	81.2003		78.6658	90.1217		63.002	81.72														55.8926	0.07313		37.859	0.03091
63.3488	83.0018		70.7472	89.2257		46.1822	89.2655														45.0262	0.042		44.795	0.04326
74.0418	83.2723		58.0312	88.3117		56.9908	85.6689														45.7198	0.0544		41.2692	0.03597
74.0418	81.8645		57.222	86.3562		50.286	89.0981														53.4072	0.05527		39.1306	0.03364
73.5216	80.7536		62.713	88.587		73.5216	89.1698														52.6558	0.0646		41.1536	0.04133
68.3774	82.2199		69.5912	86.439		60.5744	80.7931														44.9106	0.06601		37.3388	0.02891
68.6664	81.1531		62.1928	89.2171		67.9728	81.4399														39.593	0.04628		38.3214	0.04119
77.3364	82.9197		36.8186	85.0076		50.4594	89.9435														46.3556	0.05699		43.5234	0.04817
70.8628	80.5553		69.649	89.1741		57.7422	90.3265														56.355	0.0729		38.3792	0.03002
66.4122	84.1965		53.6962	88.3704		59.3606	80.8354														42.9454	0.05377		38.6104	0.04412
69.4756	83.5887		64.8516	88.5546		60.5166	89.2259														52.5402	0.05838		38.3792	0.02282
64.2736	81.833		62.9442	88.8751		64.9672	89.3366														50.286	0.0535		48.841	0.02864
68.2618	81.6943		64.5048	87.8247		61.6726	82.2406														48.841	0.03633		47.2804	0.06548
68.9554	80.6989		36.0094	87.9656		34.68	86.0809														53.8118	0.07114		45.6042	0.03763
65.5452	82.0085		71.7876	80.6843		53.2338	88.7299														53.1182	0.04181		36.8764	0.03517
69.36	81.3686		39.1306	83.2284		52.4824	89.9164														52.9448	0.03824		34.5066	0.022
75.1978	80.2647		69.5334	88.3674		42.3674	88.8071														52.9448	0.06934		36.2406	0.01845
74.5042	81.5892		93.925	88.3756		52.887	89.7291														47.685	0.03046		42.8298	0.03413
72.5968	83.7895		76.9896	88.6667		46.2978	86.99														45.2574	0.06544		36.6452	0.03391
76.296	83.2806		42.0206	88.1392		46.2978	88.0051														48.3786	0.07657		38.7838	0.02851
68.6086	82.173		70.9784	84.308		70.805	90.3375														43.6968	0.04564		41.3848	0.02958
69.8802	83.6557		50.9218	87.0409		55.7192	88.2799														34.5066	0.03053		46.6446	0.04057
67.626	81.5133		65.7186	89.0519		50.1126	88.3334														41.6738	0.0551		43.8124	0.03738
66.759	83.5557		77.8566	89.8539		57.8	89.8899														58.8404	0.05755		46.4712	0.02643
77.9144	82.9494		39.593	85.564		36.9342	85.8826														35.0846	0.02707		46.4712	0.02643
69.649	79.5576		77.452	83.2451		50.575	89.4073														45.373	0.05777		48.0896	0.043
65.0828	84.6001		81.0934	86.9625		57.3954	90.2092														49.419	0.0465		46.4712	0.03367
62.9442	81.7036		69.1866	89.1275		55.3724	89.2091														47.396	0.04524		39.5352	0.02851
72.539	81.1791		74.3886	85.9562		69.1866	81.7147														49.3612	0.05368		40.1132	0.02629
70.1692	82.2596		54.1586	88.0181		67.2792	87.4768														51.6732	0.06581		37.3388	0.03097
57.511	82.1635		89.3588	88.7903		59.3606	81.6232														55.3724	0.07461		44.217	0.03403
69.4756	81.7118		72.0766	85.0549		42.9454	88.6466														47.8584	0.04313		41.905	0.02466
66.9902	82.7534		64.3314	88.5401		55.6614	82.3264														45.0262	0.03447		46.4712	0.03051
73.1748	82.5124		36.8186	86.3329		57.222	89.0598														65.7186	0.07435		45.2574	0.03138
74.1574	80.8001		68.0306	88.5399		42.0206	88.0407														50.0548	0.05323		42.5986	0.04261
70.0536	80.4477		55.3146	89.1861		54.1008	89.2087														40.2866	0.0557		38.7838	0.02686
69.8224	84.0286		53.8118	86.9647		57.3954	89.3689														44.217	0.07305		39.6508	0.03258
71.961	81.227		58.5514	87.5286		84.8504	81.4214														52.1934	0.06475		44.4482	0.0456
59.245	81.6869		78.5502	87.6051		31.3276	86.6868														45.373	0.05201		43.5812	0.032
69.938	82.6609		38.0902	87.3469		56.355	89.9109														47.0492	0.06087		46.7024	0.03227
71.3252	81.6821		81.4402	89.9617		56.1238	87.8084														50.2282	0.07196		42.9454	0.0325
66.7012	82.3999		67.1058	82.8259		51.3264	88.6467														52.8292	0.07785		31.7322	0.02391
78.6658	81.4479		42.194	86.3804		52.7714	88.3945														65.4874	0.07694		54.2742	0.05868
78.5502	80.6482		71.961	89.4194		54.9678	90.4205														54.5054	0.05593		38.6104	0.03342
63.0598	82.4727		73.117	82.4853		57.6266	88.1894														48.0896	0.06503		49.9392	0.04533
66.8168	81.914		86.2954	73.3142		61.0368	81.3259														46.24	0.05467		43.9858	0.04507
66.9324	80.1366		67.7994	83.8046		63.6956	80.828														51.4998	0.06408		44.2748	0.03058
81.6714	81.2701		73.695	89.2906		53.9852	89.515														53.1182	0.05005		48.841	0.0322
76.874	80.833		76.9318	88.5703		59.7074	80.5412														44.3904	0.05329		44.0436	0.03314
69.4756	81.1559		38.2636	84.7116		54.332	89.5851														46.24	0.07651		38.3214	0.03272
62.713	81.0165		75.3134	88.7235		56.7596	89.6431														50.8062	0.07508		41.327	0.02899
72.4234	79.8027		61.7304	88.6937		46.0666	88.9268														51.442	0.05992		43.8702	0.04881
73.1748	82.5052		59.1872	88.0026		54.8522	81.6262														51.5576	0.04807		40.5756	0.02834
77.5098	81.9783		69.4178	88.4753		56.7018	80.7453														52.9448	0.05842		41.2692	0.03275
72.7124	80.9875		66.0076	88.2437		59.7652	89.5755														46.4134	0.0555		46.1822	0.04518
74.851	81.1957		52.8292	87.0506		65.6608	80.6351														64.9094	0.05265		41.616	0.0285
66.3544	82.3671		70.4004	80.8803		45.4308	88.9533														44.7372	0.04874		39.4774	0.03109
65.4874	81.369		65.7764	90.376		41.327	88.8692														47.107	0.04388		38.4948	0.02051
74.5042	80.662		65.6608	87.0542		61.0368	82.232														43.061	0.04903		45.4886	0.0334
64.2736	82.0126		38.9572	86.1436		51.8466	90.4721														47.9162	0.05415		41.3848	0.03824
65.2562	82.579		92.4222	89.7335		65.0828	91.7631														48.841	0.07088		40.1132	0.03539
65.9498	81.8951		71.2674	84.8693		62.3662	88.9687														44.1592	0.03679		47.2226	0.03648
66.7012	81.6334		75.6024	87.6111		50.4594	89.7671														45.2574	0.07867		48.2052	0.05008
71.961	81.561		77.1052	88.8517		60.8634	80.4328														50.6328	0.04884		39.6508	0.03739
62.8286	81.3861		96.2948	90.2628		62.135	90.2832														48.4364	0.05815		44.217	0.03447
63.0598	80.5272		56.644	87.7857		52.4824	89.2899														44.5638	0.03461		37.7434	0.0329
65.025	81.9038		66.5278	86.9978		62.5396	87.0642														36.8764	0.02837		54.332	0.05464
73.9262	82.1149		70.2848	88.7099		61.3258	89.0065														42.6564	0.03115		43.8124	0.03177
71.9032	79.9862		72.8858	88.7307		48.8988	88.7797														55.7192	0.04338		36.992	0.04409
68.4352	82.2109		49.5924	88.1072		45.5464	89.0158														44.2748	0.05073		36.992	0.04409
73.5216	81.986		64.9672	86.6029		59.5918	78.8783														53.465	0.05194		37.5122	0.03925
70.8628	83.4776		62.1928	88.5185		69.1866	85.3353														48.4364	0.06304		51.153	0.04349
71.5564	82.2793		68.3196	84.4701		54.4476	88.5283														43.639	0.03209		41.5582	0.05537
71.6142	82.3521		48.1474	89.2279		56.644	79.8187														51.3842	0.06968		45.1418	0.04046
72.8858	81.9711		80.5732	89.8852		52.309	89.1122														54.2164	0.06703		42.7142	0.0381
66.8746	83.0674		61.4414	88.4174		46.529	87.8282														50.4594	0.04122		35.9516	0.03669
62.424	83.1339		61.1524	86.6637		61.557	77.4853														50.1126	0.05718		35.9516	0.03669
69.8224	82.7832		66.181	83.5895		53.0604	88.7327														46.0088	0.06197		43.4078	0.03681
63.2332	82.8384		71.1518	78.677		46.818	89.8848														47.2804	0.06174		41.327	0.03817
63.4644	82.4401		71.8454	87.1441		54.4476	87.8035														58.378	0.10254		40.2288	0.03211
63.4066	81.4583		57.511	87.8011		59.823	81.6518														44.9106	0.04257		46.3556	0.042
67.915	83.3428		82.1916	88.1161		69.0132	81.3442														47.685	0.05724		50.864	0.07483
69.5334	81.8866		76.9318	90.0039		55.5458	89.625														41.4426	0.04217		39.882	0.03261
69.5334	81.8866		70.805	88.8405		53.3494	80.4018														53.176	0.04452		46.9914	0.03974
80.1108	81.1833		79.0126	89.3866		83.5788	90.7023														44.1014	0.04786		35.7204	0.02301
75.5446	80.2786		56.4128	86.9927		71.094	89.0734														42.9454	0.06703		48.3786	0.04633
76.4116	79.5901		66.1232	90.3309		49.3034	88.9324														49.2456	0.07639		44.2748	0.03696
68.8976	81.1649		64.7938	88.3941		57.9734	81.6366														52.887	0.05357		44.2748	0.03696
68.8976	81.1649		57.222	87.9154		50.1704	88.5965														50.6328	0.04692		48.263	0.04355
66.6434	81.9482		64.3892	88.4059		47.9162	88.0193														48.6098	0.05773		48.1474	0.0316
64.3892	82.4885		107.624	89.5728		66.6434	80.6457														48.4364	0.05769		42.772	0.02658
75.9492	82.66		63.869	88.7768		59.245	89.4776														50.0548	0.06385		40.0554	0.02323
66.2388	83.5367		65.892	88.4185		85.6018	91.1883														50.8062	0.07249		47.974	0.03339
62.9442	80.0608		64.6204	88.9099		46.8758	87.4016														49.419	0.06511		38.8416	0.03281
73.695	82.7407		75.5446	89.3564		52.6558	89.4185														53.8696	0.06524		41.327	0.04629
69.7646	80.9148		73.6372	88.1239		51.9622	83.2311														48.8988	0.04548		49.708	0.0337
71.961	81.7878		77.5098	81.2605		51.2686	87.7863														45.662	0.05377		40.171	0.0393
67.626	80.9928		67.5104	81.8075		33.4662	86.2687														38.5526	0.05483		38.8416	0.03414
70.227	82.1892		73.695	88.9353		45.2574	87.9316														44.8528	0.05412		41.1536	0.03508
70.227	82.1892		60.3432	88.4282		55.6614	79.755														51.2686	0.06997		43.928	0.03024
74.0996	81.1598		75.7758	82.0604		48.552	88.5272														43.928	0.06378		38.7838	0.03045
69.8802	80.8951		54.043	87.3549		53.0026	80.8067														43.639	0.05572		42.0206	0.03212
69.649	81.9256		51.2108	87.0269		36.5296	87.3917														47.6272	0.04708		45.0262	0.04354
66.2388	81.941		44.3904	87.2746		59.1294	82.1887														57.3954	0.0735		45.3152	0.04185
66.0654	81.4335		64.8516	86.8785		53.5806	88.2403														43.4078	0.06649		39.5352	0.03689
70.9784	82.3655		71.1518	84.1669		57.3376	88.9907														53.754	0.04107		40.749	0.03877
71.9032	81.4668		64.5048	88.6923		64.6782	81.9048														44.3904	0.05342		39.9976	0.04929
71.8454	83.4849		56.2394	79.0451		60.8634	82.9793														53.3494	0.06385		40.749	0.03877
65.892	79.3923		90.2258	90.9747		50.4594	88.626														51.2686	0.06227		39.2462	0.02677
74.1574	82.6039		72.828	87.4306		57.2798	89.3128														45.5464	0.05682		50.286	0.03575
73.695	82.4346		70.516	88.5554		38.8994	87.2039														45.4308	0.04571		50.575	0.05072
75.3712	82.415		66.9324	88.4981		86.9312	82.2617														53.2338	0.05707		44.8528	0.05142
76.585	80.6107		35.7204	84.4395		67.626	86.4967														47.9162	0.05641		41.616	0.03466
68.1462	82.2979		75.9492	84.4118		44.795	88.5897														52.3668	0.0695		43.4078	0.03825
66.9324	82.5797		57.6266	86.2498		49.1878	88.3813														52.309	0.09257		45.4308	0.01923
68.6664	83.2954		71.0362	87.3059		51.3264	88.4236														45.2574	0.07405		47.2226	0.04501
68.782	82.4511		65.4874	85.7296		54.621	89.8043														51.3842	0.09201		56.1816	0.05177
80.2842	82.3911		69.1288	87.6623		49.1878	88.2173														43.8124	0.06874		42.5408	0.03968
69.1866	80.8924		68.6664	90.8343		61.1524	89.6685														48.1474	0.07022		40.46	0.03149
65.7186	83.1456		57.5688	89.3521		69.1866	88.9919														49.3612	0.05981		46.3556	0.04328
67.2214	83.2886		59.1294	87.2597		51.6732	89.2151														44.3326	0.03531		42.3674	0.03776
70.805	81.4035		92.4222	87.974		67.2792	89.1626														52.598	0.04553		39.4196	0.03446
75.14	82.2629		52.1934	88.9859		64.7938	90.4779														44.2748	0.04509		41.038	0.02602
74.1574	80.9858		59.9964	88.7913		50.5172	90.0499														49.708	0.05452		41.5004	0.03961
71.4408	82.8206		70.516	90.0316		56.2394	82.1393														52.1356	0.05864		37.5122	0.03497
81.2668	82.2752		62.9442	88.0945		45.373	89.5205														57.511	0.05705		37.0498	0.03735
65.2562	80.7872		61.268	86.9428		65.6608	79.4837														50.7484	0.06249		44.9684	0.0365
77.9722	80.5736		59.0716	89.8541		56.7596	81.8737														45.4886	0.0502		36.8186	0.02064
67.8572	82.3693		57.6266	89.4188		51.9622	89.6624														57.0486	0.06788		43.1188	0.04303
79.8796	79.1358		78.9548	85.153		50.286	79.5827														50.8062	0.05701		43.1188	0.04303
60.401	81.9049		83.6366	85.2733		49.8814	88.8168														50.3438	0.04435		47.5694	0.02875
60.401	81.9049		34.8534	86.6721		62.424	90.6114														50.7484	0.05896		36.8186	0.02574
66.3544	82.5888		72.7124	86.3816		63.8112	79.5527														53.4072	0.05252		40.8068	0.034
65.3718	82.326		61.268	86.0149		58.8404	79.9287														51.4998	0.07973		46.2978	0.03942
67.3948	81.7428		45.1418	88.3339		46.5868	87.0966														48.3786	0.05867		36.992	0.02519
66.5278	82.5674		76.4116	90.1124		62.713	80.4106														42.9454	0.06746		37.8012	0.02622
65.892	81.6883		58.6092	88.5383		70.8628	89.3119														45.662	0.04818		36.125	0.04014
74.7354	80.5302		73.8106	85.4815		46.24	89.1703														44.9684	0.05581		41.7316	0.02551
66.0076	79.7219		62.6552	87.4275		49.1878	88.1547														44.6794	0.05414		42.3674	0.04283
69.7068	81.4968		77.3364	85.6694		64.6782	80.1352														64.5626	0.05099		37.3388	0.03681
78.897	81.7153		65.5452	89.8		54.6788	86.4														51.2108	0.05341		41.2114	0.02801
65.892	82.1864		61.1524	87.3465		44.1014	88.4332														45.3152	0.05448		48.263	0.03262
68.0306	82.9618		79.9952	89.3172		94.0406	90.5523														47.6272	0.04828		44.6794	0.04784
64.5048	81.3612		67.9728	85.8619		55.0256	81.7787														47.5116	0.05768		48.2052	0.03503
69.3022	82.1044		70.6316	88.2571		46.818	88.2412														45.373	0.06125		44.6794	0.04784
71.5564	83.1249		85.4862	89.1552		42.5408	88.0627														43.5812	0.05739		48.2052	0.03503
65.7764	82.6015		67.9728	84.5491		47.5694	88.0761														50.3438	0.06189		42.1362	0.028
67.626	82.4126		37.1076	87.7839		44.5638	88.2317														62.135	0.0507		41.7316	0.026
67.7994	81.4647		54.8522	86.8079		53.8118	89.2906														50.864	0.06225		40.8068	0.03528
63.3488	80.1174		63.8112	89.0445		49.8236	89.1787														45.1996	0.056		42.194	0.04467
64.447	79.1204		63.1754	89.6828		50.864	89.7794														49.0722	0.06152		34.5066	0.03652
62.1928	80.942		37.3388	88.6117		65.892	90.1286														45.8354	0.04612		38.2636	0.03282
64.158	81.6156		56.066	86.7267		64.5048	80.919														56.066	0.07733		42.772	0.04209
72.0766	80.9712		59.245	88.2099		55.5458	90.7424														43.9858	0.05896		36.0094	0.03055
72.0766	80.9712		65.025	88.8857		60.6322	77.9108														49.4768	0.05358		34.2754	0.02207
63.8112	81.0481		51.4998	88.9848		56.1238	89.3297														46.7602	0.04316		35.7204	0.0125
73.984	80.2632		69.1866	85.9573		42.772	88.1547														43.2344	0.06027		40.171	0.02852
61.9038	83.4173		76.9896	88.1828		57.9156	80.1125														65.7764	0.05678		36.0094	0.03089
72.4234	82.3628		63.1176	89.5068		55.2568	78.2449														50.1704	0.05649		36.4718	0.02635
66.8168	82.4991		68.1462	86.3342		48.6098	89.1939														46.6446	0.05959		37.1076	0.03077
65.0828	82.2444		71.094	88.7473		60.8056	82.405														49.419	0.07162		34.7378	0.02292
68.493	81.2438		36.0672	84.5961		64.6782	87.7422														42.6564	0.053		38.2058	0.02015
63.2332	82.1804		48.0896	88.4674		51.2686	90.4051														51.8466	0.08525		47.3382	0.03894
64.8516	81.9667		39.2462	87.5267		63.002	80.5697														53.4072	0.07603		33.9286	0.02358
65.1406	81.0804		84.677	72.4141		65.314	79.7122														45.373	0.05597		40.4022	0.03602
65.8342	82.8766		81.4402	86.7778		60.7478	90.4161														47.0492	0.05453		51.3842	0.04999
78.1456	82.2393		56.933	87.6219		64.9094	78.9341														53.754	0.07107		45.1418	0.03232
63.4644	80.4807		63.7534	88.3298		49.3612	89.3007														56.644	0.07541		48.1474	0.03282
74.7354	82.2802		74.9088	91.4949		62.0194	81.2305														47.8006	0.05874		37.8012	0.02982
66.8168	82.5519		64.2736	87.0932		54.332	89.0173														41.616	0.05581		41.5582	0.03652
68.4352	83.3451		59.8808	90.0203		57.0486	80.4345														48.4942	0.06652		49.1878	0.02917
76.007	82.7146		69.5912	84.7743		68.4352	90.3059														49.3034	0.04337		38.8994	0.03549
80.1686	80.1997		77.9144	87.4078		53.4072	89.4964														41.5582	0.04301		36.6452	0.02881
71.2674	80.5748		65.4296	86.6401		64.1002	80.9074														54.1008	0.05698		46.3556	0.05316
70.8628	81.9828		61.1524	89.5825		44.217	86.7803														62.3084	0.07092		38.3792	0.02993
74.4464	81.64		79.8218	88.7826		66.47	88.9805														35.4892	0.0624		38.4948	0.0463
70.805	81.7986		53.465	86.8908		72.539	90.2626														50.286	0.05734		44.6794	0.04033
64.0424	81.3858		86.9312	88.4299		53.3494	79.4028														50.0548	0.05315		37.4544	0.02706
70.8628	82.7873		60.112	88.6304		58.4936	83.0885														52.7136	0.07669		37.8012	0.03311
63.291	80.4391		69.4756	84.293		44.506	88.8624														50.286	0.05883		34.5066	0.02943
64.6204	80.0478		52.1356	86.6321		58.2046	79.7128														47.2804	0.04324		45.7198	0.03777
81.0934	83.1463		76.7006	83.8342		47.0492	88.0098														52.598	0.04554		35.836	0.03764
74.3886	81.258		38.6682	85.7877		58.7248	89.4939														53.9852	0.0691		40.2866	0.03435
73.406	81.4027		56.1816	89.9757		52.7714	84.7635														50.6906	0.05308		46.1822	0.03411
78.0878	79.7567		62.9442	84.3882		45.4886	89.7531														52.0778	0.06729		37.7434	0.04001
66.2966	81.0297		95.659	90.0499		70.7472	79.5269														50.9218	0.06792		42.772	0.03611
60.69	82.9205		65.1984	85.4313		63.002	88.3246														48.6676	0.05489		46.8758	0.04345
66.0076	82.1477		70.2848	82.387		65.7764	79.4333														51.7888	0.06284		43.4656	0.03175
62.1928	81.6579		84.5614	87.4739		60.8634	80.5594														52.1356	0.05152		47.9162	0.04727
64.7938	82.7407		64.8516	88.4666		53.6384	80.9246														55.4302	0.07328		45.8354	0.041
74.5042	83.7583		77.7988	83.6653		72.7702	91.2332														41.5582	0.05959		47.9162	0.04727
73.8106	81.9438		49.8814	88.0411		43.0032	88.2338														49.1878	0.04017		45.8354	0.041
67.337	80.4901		85.3706	89.8277		65.0828	89.6381														44.506	0.04335		38.3214	0.0338
63.6956	82.3689		79.9952	83.8675		63.5222	81.2084														47.9162	0.0578		45.8932	0.05142
69.938	82.8421		73.4638	86.9222		39.3618	86.9637														54.2742	0.05658		38.148	0.03283
65.7186	82.6325		50.2282	85.5753		61.4414	90.0609														39.5352	0.06747		41.4426	0.04446
73.5794	81.8397		65.603	88.3073		46.1822	88.9911														48.3786	0.04937		40.5756	0.03762
71.383	82.6382		64.3892	89.6507		49.4768	89.1263														57.7422	0.06579		43.0032	0.02388
71.1518	82.2785		68.0306	82.8091		38.3792	86.505														53.6962	0.0579		49.3034	0.03512
70.2848	81.1303		59.0138	88.9038		70.2848	90.3506														47.8584	0.06935		44.1014	0.0441
68.3196	82.899		63.6956	88.3498		70.1692	88.492														45.373	0.05282		48.6098	0.047
73.2904	83.1834		72.4812	87.4972		62.424	80.2146														42.6564	0.06364		37.9746	0.02685
73.406	82.6483		69.7646	84.2213		53.6384	81.1887														57.6844	0.06348		43.7546	0.02377
68.2618	80.6312		65.603	89.3947		65.7186	79.2116														40.1132	0.05395		39.3618	0.03308
70.1114	80.3099		66.5278	85.0573		58.956	90.5566														36.0094	0.02764		36.5874	0.01653
68.3196	83.3328		69.7646	89.7748		51.3842	89.4616														64.447	0.07174		41.7316	0.02983
73.9262	81.2667		67.6838	88.8392		62.8864	81.3709														53.5806	0.06876		48.4942	0.03332
75.1978	80.4159		55.8348	89.5822		54.7944	88.9124														45.662	0.05494		52.02	0.05134
66.9324	80.5386		65.2562	87.7598		29.8248	84.8576														62.5974	0.04776		46.6446	0.03214
65.7764	81.08		77.8566	83.9833		33.6974	86.8812														52.309	0.06112		43.7546	0.03763
61.6726	81.1234		44.3904	87.4852		46.3556	88.0919														43.5812	0.04682		40.749	0.02838
66.759	82.8423		73.695	80.4648		68.3774	90.461														42.772	0.05334		35.0268	0.03816
59.4184	83.0947		77.5676	80.9041		68.493	88.5492														47.1648	0.04618		40.3444	0.04199
66.3544	80.9287		68.0306	84.0541		58.8404	89.6263														48.263	0.06489		46.7024	0.034
69.071	82.3427		36.0094	85.5057		49.4768	88.9267														47.6272	0.04326		41.6738	0.04016
70.516	81.9517		67.626	86.1215		57.1064	89.2352														47.396	0.06099		43.2922	0.04656
80.2842	81.7451		88.3762	90.0871		50.5172	88.9885														44.6216	0.05339		39.593	0.02207
76.6428	82.1381		66.4122	89.1588		69.1288	80.8478														51.9044	0.06481		45.1996	0.06081
70.2848	81.8179		53.9274	88.719		44.8528	88.6852														53.2338	0.05819		45.4308	0.04183
68.0884	82.5384		63.58	86.0237		44.6794	88.7178														44.6216	0.0426		36.9342	0.03481
69.0132	82.1325		84.0412	85.6056		47.8006	88.9287														50.7484	0.07691		40.9224	0.04259
69.7646	81.8698		84.5614	91.0119		68.1462	82.0365														46.4712	0.04559		36.5296	0.0422
71.3252	84.3986		70.4004	81.8855		50.6906	89.2166														54.2164	0.0605		44.217	0.03269
65.1984	83.2559		69.1288	89.3444		66.0076	80.8685														51.6154	0.06354		41.1536	0.02699
74.1574	81.8892		78.4346	88.5288		57.8578	89.3378														45.5464	0.05872		41.038	0.02562
57.9734	82.9103		76.007	83.5712		47.0492	89.946														50.3438	0.07165		41.7894	0.04593
67.915	81.6527		59.0138	87.2551		49.5924	87.6105														43.061	0.04838		42.3096	0.03041
65.1984	82.2789		77.452	88.4759		66.0076	80.6058														48.3786	0.05642		35.4314	0.0317
71.9032	82.1297		78.608	89.1922		54.7366	91.2958														45.3152	0.06048		44.1592	0.04306
75.0244	80.713		60.7478	89.7807		53.6384	90.7597														47.3382	0.04573		37.6278	0.04482
69.8802	81.6727		57.1064	89.1269		36.6452	88.9412														43.8702	0.05767		38.148	0.03928
64.9094	81.8779		76.874	89.2862		38.0902	88.0056														49.7658	0.04388		34.2176	0.02264
69.1866	80.2228		61.4992	87.7432		54.043	89.2293														43.2922	0.04945		48.8988	0.0505
64.3314	81.9493		38.4948	88.1493		52.8292	81.1336														54.4476	0.0633		47.6272	0.04233
69.9958	81.2989		66.4122	87.5442		45.084	83.4366														49.0144	0.06379		40.2288	0.02803
74.562	81.3448		73.406	85.2065		43.5234	89.0768														46.7602	0.06085		40.8068	0.03479
79.7062	83.4381		76.0648	81.904		47.396	88.1348														49.6502	0.09338		49.3034	0.04616
65.1406	82.7082		68.782	87.6414		61.7304	82.2393														52.2512	0.0419		39.9976	0.03219
73.8106	80.094		75.429	86.3081		33.8708	87.007														52.4246	0.05973		43.639	0.05775
69.1288	83.1985		64.5626	89.3739		54.91	83.1546														43.8702	0.0508		41.7894	0.0303
73.2326	82.0439		70.0536	88.0756		75.0244	89.8697														58.378	0.06077		42.772	0.03358
61.6726	81.8535		80.6888	88.7615		49.1878	89.9103														54.3898	0.05362		41.2692	0.04067
61.6148	80.8566		75.429	90.2189		50.9796	90.1098														48.4364	0.04513		45.662	0.02847
71.961	81.6147		86.989	86.3378		55.1412	82.0643														58.6092	0.06379		40.5756	0.02493
79.2438	83.9942		62.8864	89.6355		56.1238	89.6887														41.5004	0.05908		37.6856	0.02625
65.2562	81.5082		69.9958	88.9981		52.4824	88.962														41.4426	0.06229		37.3966	0.02757
70.4004	82.8869		38.3792	88.0334		50.286	89.765														44.9106	0.06147		38.148	0.02819
67.2792	82.2634		50.5172	86.1228		57.8	83.8025														39.2462	0.05134		45.7198	0.03134
67.2792	82.2634		59.7074	88.9072		60.979	88.8357														45.8932	0.06815		42.3096	0.04316
64.1002	80.3271		61.2102	89.2269		77.452	90.556														51.6732	0.05876		34.8534	0.0261
60.6322	81.7807		61.6148	88.5658		66.7012	80.3077														46.7602	0.06506		45.951	0.04928
60.6322	81.7807		92.48	86.783		59.9964	89.5564														49.3612	0.046		44.5638	0.03902
70.805	82.3737		86.411	89.3248		56.644	90.6499														51.4998	0.0551		40.9224	0.02797
65.7186	81.1481		62.4818	88.9947		45.5464	88.9306														51.8466	0.06407		42.3096	0.03872
64.9672	80.9375		64.5048	83.2664		67.626	90.4295														46.0088	0.06696		36.4718	0.02573
75.718	83.1711		71.2674	87.0538		34.969	87.4163														51.731	0.07593		40.46	0.03359
70.516	83.0704		65.892	90.2282		48.552	89.9496														45.084	0.04526		47.685	0.03125
66.9902	81.6279		62.5974	90.4044		51.7888	81.6765														49.8814	0.08233		47.8584	0.04574
64.2158	83.656		64.9094	87.7975		47.4538	87.4189														55.3146	0.05486		43.35	0.02979
69.1288	82.3536		39.593	86.3298		54.91	81.5323														49.5346	0.04676		40.5756	0.03191
69.3022	82.6965		68.782	89.5623		60.4588	82.657														50.9218	0.06091		38.6682	0.03274
70.9206	82.6654		66.47	85.4519		49.8236	89.3598														51.8466	0.04154		42.4252	0.02751
67.5682	83.8449		82.7118	89.2748		44.217	89.9827														38.9572	0.04916		45.7776	0.0249
61.1524	81.8507		83.4054	89.0595		64.3314	78.9323														49.7658	0.05411		49.0144	0.05018
68.4352	81.2131		82.8852	85.1232		56.644	81.9628														30.923	0.02401		43.6968	0.05047
72.539	83.3004		69.3022	90.0412		49.4768	90.1533														43.7546	0.0434		45.662	0.0329
66.759	81.5887		57.8	87.3708		36.414	86.9623														47.2226	0.0548		39.7086	0.02452
74.1574	79.6138		66.0076	87.8144		52.7714	89.2129														47.9162	0.05338		45.8932	0.03396
74.562	82.9666		68.2618	88.6726		42.3096	87.4184														50.4594	0.06013		45.6042	0.03939
64.5048	81.1583		63.9846	88.0583		52.5402	88.8441														51.6154	0.04604		40.0554	0.03177
63.0598	82.2185		72.0188	88.1384		41.1536	86.9753														50.5172	0.05691		35.3736	0.04002
68.9554	83.1825		70.6316	89.8465		43.061	88.2195														53.0026	0.06178		40.8646	0.02917
77.741	79.9962		49.0144	86.8266		54.7944	88.1712														56.066	0.05576		42.5408	0.05074
67.4526	80.2723		63.6956	90.4851		58.378	80.2004														63.58	0.07619		37.2232	0.01974
63.9268	83.9742		59.4184	88.4238		57.0486	81.9975														49.419	0.06308		41.905	0.02932
73.9262	83.2144		66.7012	88.4413		43.8702	89.2474														41.9628	0.04551		43.2922	0.03128
72.25	81.6591		49.2456	87.4161		46.4134	89.1765														44.506	0.05949		36.414	0.02718
70.0536	81.2294		66.2388	88.3225		58.4936	80.672														46.8758	0.04643		40.9802	0.03858
68.0884	80.9696		64.9094	86.9928		48.1474	89.2704														48.7254	0.07286		37.281	0.02503
67.048	81.7192		62.1928	88.2682		56.8752	85.9306														49.0722	0.0667		41.4426	0.03559
74.3886	82.146		62.135	86.7542		63.1176	79.4824														39.8242	0.05484		39.3618	0.04826
75.14	82.0693		51.9044	89.2362		56.5284	82.4381														46.0666	0.06262		43.6968	0.03826
66.5856	83.0575		72.7124	83.2742		54.9678	81.9608														43.4078	0.04747		39.8242	0.02994
72.0766	83.2072		63.9268	87.013		54.8522	88.8378														47.396	0.0448		43.061	0.04377
58.4936	81.4243		75.2556	82.4857		53.2338	80.9596														45.084	0.0501		47.4538	0.04122
78.03	81.4013		64.447	89.3409		74.1574	90.0374														56.1238	0.06638		40.1132	0.02923
65.3718	82.1079		72.5968	88.2582		58.1468	81.0572														43.35	0.05032		41.616	0.0333
77.5676	84.1931		57.7422	89.5067		46.2978	88.7531														50.0548	0.06092		43.2344	0.03238
65.4296	82.8916		66.759	81.5336		65.4874	80.6818														54.1008	0.05236		47.7428	0.04628
75.2556	80.7678		55.7192	89.3124		55.5458	89.1144														49.6502	0.04767		38.6682	0.034
65.3718	83.57		66.0654	89.1413		70.516	88.9479														49.0722	0.05297		39.8242	0.0325
74.7932	80.6212		59.7074	87.815		65.8342	88.486														45.4886	0.05235		39.0728	0.02379
75.9492	82.4748		62.7708	87.8651		61.9616	89.7036														47.974	0.06441		47.3382	0.04534
66.2388	81.6858		82.076	89.1498		47.2226	89.0536														54.1586	0.04426		35.4892	0.02391
67.626	81.0776		72.6546	87.0649		80.631	82.8324														35.0846	0.02902		50.0548	0.04765
70.7472	81.4206		61.4414	88.6747		62.0194	90.3988														51.3842	0.05772		47.9162	0.03064
84.6192	81.9069		67.915	89.228		53.8696	89.3457														43.639	0.039		49.6502	0.03769
70.9784	80.5825		63.0598	90.2552		65.314	82.2139														46.3556	0.05832		40.171	0.02527
70.1114	81.2793		82.654	88.0783		65.314	89.6907														48.3208	0.08175		37.3966	0.02951
69.2444	82.5342		62.713	85.5943		87.278	90.9241														49.13	0.05281		47.0492	0.02842
71.7876	82.8899		69.938	88.6945		71.9032	89.6576														45.2574	0.05472		40.9224	0.02591
69.9958	83.7903		72.3078	86.8138		49.0144	89.6769														36.9342	0.04476		51.3842	0.05979
71.7876	82.8899		64.0424	85.6514		69.649	80.9744														49.8814	0.07033		37.0498	0.0268
69.9958	83.7903		82.943	89.0965		52.1356	82.2367														52.5402	0.06152		39.882	0.03687
79.9374	82.3327		64.2158	85.211		51.2686	89.6619														47.5694	0.06198		36.8186	0.02678
68.6086	83.1245		74.851	84.9683		62.4818	82.6863														47.5694	0.0472		52.1356	0.03975
72.1344	81.5927		36.703	87.1402		48.9566	79.9027														50.2282	0.04192		48.841	0.03913
70.4004	83.4368		65.4296	89.7027		59.0138	90.1611														42.3674	0.04945		36.5296	0.02795
64.8516	81.4454		68.3774	88.663		57.3376	89.0976														47.5116	0.04593		31.8478	0.01898
85.255	80.1057		79.7062	86.6497		44.1014	87.4435														44.9106	0.05844		37.281	0.03321
69.1866	82.4334		61.7304	88.9077		57.0486	80.7467														42.0784	0.048		46.5868	0.02622
71.094	81.9037		79.764	89.1547		34.7378	87.0607														63.4644	0.07093		40.1132	0.03428
65.314	81.2105		70.516	90.9235		43.0032	87.6815														44.0436	0.05024		44.3904	0.03485
68.4352	81.7396		68.5508	89.3248		58.0312	90.1631														47.396	0.06201		43.8124	0.0431
69.1866	82.8087		69.8224	87.9844		58.1468	88.5105														41.327	0.046		48.9566	0.0246
64.9672	82.8181		72.25	80.5593		59.0138	80.673														65.9498	0.09339		46.4134	0.04004
65.1406	82.3408		64.447	88.8644		49.0722	87.425														67.337	0.06528		45.662	0.03912
76.4116	80.6259		79.3594	86.5497		45.3152	87.3612														54.621	0.06512		42.9454	0.03365
66.3544	81.4641		80.4576	83.9851		48.3208	89.3222														61.557	0.08378		40.0554	0.0303
69.7646	80.7029		59.7074	88.4638		60.2854	89.8466														48.0896	0.05341		43.4078	0.03118
66.5278	82.0983		69.7646	85.0761		61.7304	80.8929														44.4482	0.05009		38.9572	0.03333
66.9324	83.128		38.6682	86.2155		51.7888	88.939														41.7894	0.05516		44.506	0.03565
67.7416	82.4052		53.5806	87.3343		63.6956	84.0063														59.3028	0.07379		41.038	0.05249
75.8914	81.3778		73.117	89.6439		65.0828	90.1238														64.5626	0.04347		38.148	0.03176
66.47	83.1431		66.3544	88.1734		65.5452	89.7237														46.1822	0.06857		41.038	0.05249
66.759	83.2522		59.534	88.2401		63.7534	89.7619														47.1648	0.0503		36.414	0.02879
83.521	82.8614		65.603	86.5438		47.9162	88.4174														40.46	0.05212		39.3618	0.05116
81.6136	81.0526		67.5104	88.2472		50.3438	88.7048														44.7372	0.03392		36.0672	0.0241
65.6608	79.5869		48.9566	87.8408		50.5172	87.2777														39.1306	0.05154		45.3152	0.04291
75.718	82.1948		92.769	83.6602		58.0312	81.0018														46.8758	0.05836		37.1654	0.02513
65.0828	82.5965		59.6496	88.569		49.7658	88.6983														54.2742	0.07091		46.2978	0.02928
76.874	81.5835		48.7254	85.8886		69.2444	88.3123														40.9802	0.05668		40.2288	0.03794
73.7528	82.0683		55.7192	88.7823		53.754	88.767														43.4656	0.03468		38.2058	0.04086
60.3432	83.0186		73.2326	86.6521		60.112	80.1413														48.3786	0.07602		34.2176	0.02826
64.9094	82.3842		70.805	88.6431		37.57	87.8723														49.5346	0.05107		37.8012	0.02324
65.3718	83.0388		63.58	85.5088		51.9622	89.5357														62.2506	0.0791		45.0262	0.03814
66.5856	82.3458		67.048	86.3335		49.9392	89.8013														49.5346	0.0743		41.5582	0.03908
70.7472	82.0146		66.1232	86.8446		69.0132	82.7361														43.35	0.05087		42.1362	0.05795
75.7758	82.2921		83.4054	88.9383		52.3668	89.6842														49.997	0.06862		42.2518	0.03797
72.4234	81.9105		58.8404	88.2726		46.0666	87.7089														44.8528	0.05853		37.9168	0.0231
68.9554	82.3148		62.3084	87.4951		45.084	88.5645														53.4072	0.04324		37.5122	0.03063
72.7124	82.5177		70.9206	89.5902		36.3562	87.2276														49.3034	0.05415		42.1362	0.04262
64.3314	81.7404		60.5744	89.6104		48.4364	88.8081														46.529	0.0601		42.1362	0.04262
67.4526	82.8551		80.2264	90.1284		46.24	89.3652														59.8808	0.07401		40.2866	0.03509
84.1568	80.9687		71.0362	84.9501		42.8876	85.8758														49.997	0.05711		43.9858	0.03344
70.9206	83.3926		61.846	89.9304		53.8118	90.1489														43.35	0.06164		37.8012	0.02208
66.7012	82.9589		58.2624	87.8641		58.8404	82.3095														49.5924	0.05989		38.6682	0.02884
76.1226	81.2102		81.2668	83.5516		87.9716	90.5934														52.5402	0.04104		30.9808	0.05028
74.7354	81.9582		80.053	87.0781		52.598	88.6813														43.8702	0.05235		42.0206	0.03589
70.4582	82.8766		57.4532	86.7007		41.6738	88.3053														43.9858	0.06606		51.9044	0.03841
74.273	84.2624		59.8808	88.967		51.6732	88.8055														59.6496	0.0529		41.616	0.02668
70.1692	81.2292		35.836	85.3415		56.2972	81.7152														47.0492	0.04543		45.7198	0.03657
76.1804	83.4457		71.5564	90.1923		49.8814	89.5872														46.8758	0.06004		47.2226	0.03857
73.695	80.5607		83.9256	83.7102		55.488	89.2282														43.2922	0.05742		40.4022	0.02252
67.7994	82.8767		60.1698	87.3365		45.1996	88.8811														49.8236	0.08079		44.1592	0.04525
67.7994	82.8767		60.4588	88.8558		38.148	86.6068														49.997	0.0779		39.7086	0.03284
64.0424	82.1612		72.0766	82.4876		39.6508	87.3173														50.864	0.05593		39.304	0.0327
65.2562	82.2819		80.5732	89.224		60.0542	88.8467														53.176	0.07489		40.749	0.04215
67.9728	84.0314		68.0884	89.0278		59.4184	80.3553														53.2916	0.08148		43.8702	0.04516
69.1288	82.5863		71.383	90.0906		47.9162	88.2582														46.2978	0.064		35.6626	0.0248
74.9088	83.2394		75.7758	85.3766		49.5924	88.7282														48.6676	0.05155		46.7024	0.0405
70.2848	81.3524		83.0586	83.6461		52.0778	89.481														44.4482	0.03309		40.3444	0.03041
65.314	82.1044		60.8056	87.8827		55.7192	79.9729														51.3842	0.05416		37.6856	0.02018
66.759	82.8215		63.9846	88.9242		48.9566	90.0869														55.8926	0.05402		46.24	0.04985
74.5042	80.6767		59.3028	88.3771		71.3252	81.1568														48.3786	0.05218		38.7838	0.02515
75.4868	81.8576		34.1598	85.8129		62.6552	79.8015														49.8814	0.06977		50.4016	0.02514
64.9672	81.9274		81.787	91.1517		58.4936	90.2042														56.2972	0.07555		47.685	0.03465
75.4868	81.7646		71.5564	89.443		47.7428	88.8077														46.5868	0.04345		40.1132	0.03652
63.7534	82.818		59.4762	90.1621		48.2052	89.4673														45.1996	0.05269		43.5812	0.0386
70.516	83.7824		72.539	86.5126		69.3022	79.6864														44.9106	0.04215		38.6682	0.04171
70.1114	81.3816		75.3712	87.9889		59.8808	88.6939														50.6906	0.05933		46.5868	0.05511
69.1866	82.3175		49.5346	86.8636		48.4942	88.4853														37.859	0.03694		38.8416	0.02795
77.5676	81.2155		83.6366	90.5368		70.7472	88.308														57.4532	0.06183		50.9218	0.0378
62.6552	82.4099		90.3414	89.3452		57.3376	89.7287														34.5066	0.03926		41.4426	0.03079
74.4464	82.3244		72.7124	86.6305		54.6788	89.7431														54.6788	0.04867		44.3904	0.03476
72.25	79.6874		75.8914	89.4035		62.9442	82.722														48.0318	0.06058		39.0728	0.03057
67.5104	82.1165		70.0536	89.4447		65.603	81.9162														53.0026	0.04554		39.3618	0.03473
69.8802	82.4603		62.8864	87.5965		74.0996	89.7169														34.9112	0.05084		42.8876	0.0454
72.4812	81.9603		62.3662	89.0347		48.4364	88.3659														49.13	0.06541		47.5116	0.06424
84.1568	81.5726		39.7086	84.6435		46.9914	89.4457														63.002	0.09112		44.6216	0.02686
68.0306	81.0356		81.498	85.6017		49.4768	79.1911														53.3494	0.04133		36.2984	0.0412
68.204	81.8105		56.5862	89.7663		62.0194	78.2242														49.1878	0.04855		39.2462	0.04528
66.5856	80.6724		63.1754	89.2585		83.3476	79.3004														54.5632	0.06327		51.442	0.04224
64.9094	82.3594		45.4886	89.0489		49.1878	88.3738														48.263	0.04246		37.281	0.04221
63.6378	82.3749		67.6838	84.0631		66.9902	79.7784														46.24	0.04462		41.905	0.03472
68.0306	80.2456		64.447	87.1134		48.6098	88.5574														39.593	0.03654		39.8242	0.02876
66.5856	81.2225		72.828	87.5941		57.4532	89.1133														56.4706	0.06263		43.0032	0.03921
64.6204	82.6757		69.1288	85.4972		64.2158	89.6642														54.91	0.06292		39.304	0.03186
66.3544	82.1114		71.2674	85.0619		50.0548	80.2948														43.928	0.04347		44.1014	0.04538
77.2208	81.5456		46.818	89.4214		50.864	90.0506														47.0492	0.05733		43.061	0.04754
78.608	82.7154		65.0828	84.0069		49.5346	88.7941														46.24	0.04842		45.1996	0.02992
73.5216	82.2667		77.6254	89.2444		40.3444	88.115														49.419	0.05196		40.1132	0.0347
72.25	82.4413		85.1394	86.2161		48.263	87.8825														36.3562	0.01733		44.3904	0.03358
69.7068	80.3341		63.0598	88.9144		59.1872	89.0898														49.1878	0.0512		45.1418	0.03404
61.1524	81.6502		58.3202	89.876		63.0598	81.6163														47.8006	0.04612		37.57	0.03023
69.36	81.105		77.452	86.1739		69.1288	89.8227														48.1474	0.0601		39.8242	0.02165
69.36	81.105		67.915	81.4856		57.3954	89.8536														43.639	0.06523		47.2226	0.04415
70.9206	79.3578		62.6552	87.7195		58.4936	89.8918														45.4308	0.04081		53.6962	0.04391
71.2674	80.0703		47.6272	87.3653		45.951	88.8127														49.8814	0.06003		43.2344	0.02994
66.759	82.2769		41.5004	86.9549		57.5688	90.2504														44.8528	0.05186		45.084	0.03451
73.0592	81.5078		82.654	87.7223		58.8404	89.0221														47.8006	0.0427		43.6968	0.04882
71.2096	82.0397		56.4128	88.1254		66.0076	89.5785														48.1474	0.0583		51.442	0.03999
34.7956	84.8696		89.301	88.516		52.7714	89.2916														43.5234	0.06058		38.8416	0.03265
34.7378	83.8679		56.1238	87.3742		65.9498	79.0933														43.8702	0.04266		35.6048	0.02332
32.3102	82.926		66.3544	82.9743		55.6614	81.9628														47.7428	0.04585		41.5004	0.04165
36.6452	83.5627		61.0368	87.0885		43.35	89.2129														52.6558	0.06456		33.9286	0.02245
40.6334	86.2255		61.846	89.0548		56.1238	78.0832														34.969	0.04096		37.8012	0.02747
43.0032	85.8394		71.8454	88.4287		49.7658	89.631														50.6328	0.0378		40.8068	0.0289
42.5408	84.4993		43.8702	87.5691		93.1158	82.4842														50.4594	0.07129		37.6278	0.05903
38.4948	84.2165		86.3532	90.9697		92.769	90.9658														51.442	0.06809		41.5004	0.03365
38.5526	84.5221		73.984	85.4436		52.887	89.3327														58.3202	0.06156		38.2058	0.01828
40.9224	84.7215		64.736	89.3369		61.7304	82.0678														46.9914	0.04521		47.7428	0.02849
39.1884	86.8156		98.7802	90.2415		40.3444	86.1761														38.0324	0.04146		43.0032	0.04141
32.657	84.9401		92.8268	89.8218		40.6912	88.4415														46.4134	0.05405		38.8416	0.04043
36.6452	84.3064		85.3706	87.0703		74.562	80.8889														44.795	0.0404		41.9628	0.02622
43.35	88.2358		60.6322	87.9332		50.7484	89.7824														43.7546	0.05775		47.8006	0.05614
34.4488	86.6319		72.7702	88.9233		57.8578	89.4687														51.3842	0.06796		42.2518	0.0281
34.2176	85.0927		58.0312	87.3974		42.7142	88.9806														53.176	0.06029		48.841	0.04895
41.038	87.3894		68.6086	89.8672		53.754	89.9464														50.1704	0.07311		37.6278	0.02989
33.235	86.1644		57.4532	88.6463		42.4252	88.7557														54.3898	0.07282		36.125	0.02576
33.3506	84.8595		58.667	88.9294		45.7776	88.6598														46.529	0.04609		41.4426	0.02812
34.5066	86.0252		60.9212	88.7039		56.1816	89.2426														54.332	0.06651		38.3792	0.03023
34.0442	84.3038		63.8112	86.5409		62.9442	82.307														54.043	0.05839		43.8702	0.02997
34.0442	85.2716		72.7702	86.0201		70.3426	89.4224														43.928	0.0485		33.235	0.02653
39.882	86.7077		70.1692	89.9814		61.6726	89.8794														46.0088	0.06307		39.9398	0.03562
38.5526	85.1219		38.4948	85.4516		54.3898	89.3652														35.547	0.02694		37.1076	0.03747
39.015	85.7066		66.759	88.9741		62.8286	81.5311														49.0722	0.07013		39.6508	0.03475
38.6682	84.3469		61.3258	89.2031		59.534	90.3329														51.7888	0.0501		46.2978	0.0464
39.9976	85.3973		73.2904	84.5202		59.5918	79.4273														54.7366	0.0606		37.6278	0.02384
41.2114	86.3814		75.14	88.4268		58.378	89.9529														56.933	0.0509		42.6564	0.05192
40.6334	87.7663		70.227	90.0406		48.263	89.4616														45.8932	0.06976		47.9162	0.03636
40.0554	86.3731		73.117	90.2617		59.0716	90.6186														44.0436	0.03656		34.2754	0.0292
49.4768	87.6652		64.9672	87.8751		58.1468	89.6228														42.4252	0.04988		38.437	0.02745
33.2928	86.0543		66.1232	89.0442		68.493	82.0843														46.4134	0.05882		43.7546	0.07935
32.1946	83.7702		53.9852	88.0108		55.3146	89.8622														53.3494	0.04603		45.4308	0.03777
36.9342	86.8001		62.0772	86.2277		57.0486	89.8706														51.442	0.06626		39.593	0.0363
37.9746	86.7562		34.5066	83.5798		52.02	81.0968														47.685	0.06458		40.2288	0.03616
43.1766	88.0167		63.002	89.3126		92.0754	90.8829														54.5054	0.05594		38.3792	0.04699
42.3096	86.6743		32.4836	86.8918		47.8006	89.0128														49.0722	0.06845		44.8528	0.03596
32.1946	85.5526		79.3594	84.7906		44.1592	89.1191														46.7024	0.04607		47.4538	0.02629
38.2058	84.5828		60.0542	87.0559		56.066	88.7712														48.6098	0.05302		41.2692	0.04317
35.4314	85.3349		56.7596	87.1365		51.3842	87.0495														49.13	0.07044		50.5172	0.0432
34.7956	84.0417		59.1872	86.9815		48.3786	89.2619														46.1822	0.04723		40.1132	0.03372
35.6626	84.7752		85.7174	89.6662		50.8062	88.377														56.1238	0.0695		38.8994	0.03513
38.0324	86.924		74.9088	88.4406		31.7322	84.9456														48.2052	0.06343		37.7434	0.01914
34.9112	85.0254		57.5688	87.902		64.0424	90.7163														49.708	0.04644		45.5464	0.03123
33.235	86.9066		78.897	87.7129		45.084	87.5069														48.6098	0.0568		40.5756	0.04354
32.657	85.9141		73.984	88.6682		57.8	81.9539														45.8354	0.05059		39.1884	0.03209
34.9112	84.1794		57.222	88.2793		48.0318	89.0698														48.4364	0.06926		42.0784	0.03998
39.6508	86.2312		39.9976	87.963		39.7664	85.3269														57.222	0.05843		38.7838	0.04286
40.1132	84.8096		56.933	87.7017		53.0026	89.0679														56.1816	0.05845		39.304	0.0192
34.391	85.7496		81.9604	89.1983		79.475	88.7795														47.6272	0.0604		44.3326	0.02956
42.0206	85.175		56.8174	89.5525		51.442	89.54														47.0492	0.05789		41.6738	0.02731
39.015	86.373		58.1468	87.3876		58.2046	89.6985														46.8758	0.04323		39.7086	0.0359
40.749	85.72		77.3364	86.6669		50.8062	89.5029														48.9566	0.06757		42.8298	0.03433
39.4774	87.6229		78.0878	88.9694		53.6962	88.4309														42.3674	0.04656		46.0666	0.03933
33.0616	84.3124		69.4178	87.9834		55.8348	88.7272														49.997	0.06376		43.0032	0.03163
33.0616	84.3124		65.7186	89.4622		49.0144	88.5671														45.7198	0.04357		41.8472	0.03043
40.2288	86.1494		31.7322	87.7306		52.1356	89.7124														39.6508	0.05543		43.4656	0.03927
32.657	84.4112		86.411	88.706		67.337	90.3842														42.8876	0.04982		41.7894	0.02886
35.7782	86.327		64.736	85.9674		49.997	90.8286														50.4594	0.03936		31.0964	0.01404
40.171	84.6123		74.6198	86.0936		51.2108	88.9109														62.424	0.07294		45.8932	0.02681
39.4196	85.516		37.6856	85.4365		41.7316	85.4351														46.2978	0.06527		48.7254	0.03182
32.8304	86.4291		84.7926	88.9763		59.7652	90.4849														42.0206	0.06113		41.7894	0.03396
33.1194	86.8661		45.3152	86.8998		40.6912	87.2409														68.4352	0.0769		42.2518	0.02648
37.3966	85.6934		73.5794	89.5517		59.4762	87.8876														56.1816	0.06165		40.1132	0.02245
38.148	84.338		66.4122	85.6257		48.0318	88.9065														47.685	0.08472		47.6272	0.04405
37.6856	85.0271		67.337	85.6068		48.9566	89.7139														50.9796	0.08218		46.1244	0.02788
38.2058	86.7083		92.191	90.5385		41.6738	83.8776														52.7714	0.06501		42.2518	0.03849
36.8186	84.9838		72.25	88.6543		34.3332	85.9728														43.7546	0.05856		42.9454	0.05193
32.7148	84.8266		53.4072	85.5173		45.8932	88.3088														50.6328	0.05477		47.1648	0.04334
32.1946	83.6616		50.3438	89.3005		49.8814	92.6268														42.5408	0.04777		35.6626	0.02791
38.8416	85.9371		85.6596	90.9449		59.7074	79.7207														47.5116	0.06568		38.4948	0.04517
35.2002	83.3494		54.9678	87.8658		57.5688	89.9788														51.2686	0.05886		46.2978	0.04018
38.0324	86.0081		68.204	88.4924		42.3674	87.4987														51.6732	0.04632		43.8124	0.0388
35.0846	85.5913		35.0846	84.3759		66.759	89.725														51.9044	0.07314		44.4482	0.05536
37.1076	84.3532		50.286	89.1188		90.457	89.6225														41.0958	0.04278		38.0324	0.02598
38.0902	86.9432		59.1294	88.3918		59.3606	89.6793														47.9162	0.06648		41.4426	0.03798
38.0324	85.8515		80.5732	89.9105		51.6732	89.6842														51.6732	0.05623		38.9572	0.03594
35.547	85.8231		65.1984	89.4497		37.1076	86.2432														44.506	0.03572		44.3326	0.0334
38.8416	86.2995		37.1654	86.8492		56.7018	89.4789														47.2804	0.04352		43.2344	0.03038
30.9808	86.3122		52.887	88.7563		53.5806	90.6459														44.0436	0.05765		44.1592	0.0364
30.6918	84.947		40.171	86.8785		52.1934	81.2275														44.4482	0.05214		47.974	0.05001
38.4948	87.4737		67.4526	88.5256		67.2214	82.2925														46.6446	0.05535		37.3388	0.01983
35.3158	85.0595		76.7584	86.2465		59.9964	82.1783														49.997	0.09737		34.7378	0.03307
35.0268	85.1116		74.6776	89.6355		63.9268	82.3126														42.9454	0.05475		51.9044	0.04959
43.928	86.8421		107.566	84.4223		60.2854	90.412														43.639	0.06395		43.0032	0.03953
34.5066	85.0467		57.7422	82.4231		54.7366	88.6122														36.7608	0.09897		35.0268	0.03066
33.5818	84.2681		70.4004	90.1028		62.8286	90.2871														47.7428	0.06817		38.3792	0.0302
35.3158	86.3466		91.902	87.9835		63.8112	88.786														40.6912	0.03348		49.8814	0.04455
36.2406	83.915		48.0896	86.9895		46.5868	88.824														51.2686	0.06186		45.8354	0.03721
35.7204	84.7159		72.1922	88.9239		55.488	89.4948														59.5918	0.07691		36.2406	0.02423
37.0498	87.2438		51.3264	88.2892		53.3494	82.0141														38.3792	0.04153		38.2058	0.03294
36.7608	85.7647		61.3258	87.9818		60.112	91.3387														66.2966	0.07099		46.2978	0.02681
34.5066	85.6702		58.2046	88.158		52.5402	83.2869														46.5868	0.06373		41.038	0.02632
38.8994	84.8329		74.3886	88.4274		55.3724	88.7887														51.9622	0.06357		35.4892	0.03751
37.859	84.9204		50.1704	87.0879		46.7024	88.9688														52.9448	0.06698		42.3096	0.04049
38.8994	84.4423		94.792	90.6731		53.3494	89.1604														46.1822	0.06075		47.2226	0.03373
32.4836	86.4627		64.7938	84.9395		59.3028	89.3763														48.0896	0.05407		43.35	0.03624
31.6744	85.1508		59.8808	89.0562		51.0374	80.3504														51.9622	0.04293		41.6738	0.03781
32.1946	86.3663		78.0878	84.1377		39.5352	85.6984														50.864	0.07295		43.8124	0.04115
31.4432	84.6808		42.1362	86.282		43.1188	87.4044														44.506	0.04853		40.3444	0.02583
34.391	84.5303		70.4582	87.8		72.4812	91.4168														43.639	0.04811		48.3208	0.03744
34.3332	85.4484		78.2612	86.9533		56.4128	89.8855														47.2226	0.04406		41.8472	0.02702
43.2922	87.9745		42.483	88.1121		68.4352	79.9648														44.217	0.0385		39.3618	0.02939
43.061	86.4296		73.9262	90.299		69.071	80.4272														50.8062	0.0741		39.7086	0.0281
34.4488	85.3753		64.5626	87.7379		55.4302	88.5739														57.3376	0.09449		42.3674	0.03513
34.9112	84.7271		71.8454	86.0767		58.5514	89.2467														52.6558	0.05516		47.9162	0.04495
33.1194	84.3968		108.202	90.2366		49.4768	80.7651														44.9106	0.06267		46.3556	0.03882
38.6682	84.0889		57.0486	83.1369		58.8404	82.0707														56.933	0.07828		42.5986	0.04446
36.1828	85.4867		82.5384	86.031		47.5694	88.347														47.974	0.0498		38.7838	0.03771
33.0616	84.9732		66.4122	89.4412		47.3382	88.2765														46.818	0.05594		42.194	0.03902
41.905	86.3336		63.869	90.0061		55.0256	89.4816														48.9566	0.07007		41.2692	0.03663
32.4836	86.9439		81.0356	89.5422		54.7366	79.0138														52.6558	0.07519		48.2052	0.02752
41.3848	87.0379		72.8858	91.0099		65.4296	91.5091														48.8988	0.04447		39.304	0.03693
37.1654	86.3835		62.424	90.2666		52.02	89.3041														48.4942	0.06927		43.2922	0.03451
36.992	87.1613		73.8106	82.4451		33.7552	86.4497														47.4538	0.04598		45.0262	0.03839
35.8938	85.3546		76.1226	88.862		56.8752	81.101														46.529	0.04613		41.8472	0.02658
29.4202	84.8828		67.337	86.6401		56.5284	89.1803														51.2686	0.04468		42.3096	0.03113
33.2928	85.1794		31.0964	83.8853		55.5458	79.8989														43.8702	0.05999		39.2462	0.02017
39.015	86.6105		36.2984	87.2885		46.2978	88.6721														54.332	0.05163		38.4948	0.03717
37.6278	86.1709		62.2506	87.2796		46.818	90.2774														50.1126	0.06396		51.7888	0.0357
37.3966	86.9687		58.089	88.1693		57.5688	81.4175														44.5638	0.05123		51.2686	0.03736
36.8764	85.7185		78.0878	84.0822		36.2406	86.1329														44.795	0.05721		39.5352	0.0508
33.4662	84.5277		39.5352	86.9769		47.685	88.7119														52.4246	0.06932		38.726	0.03113
39.015	84.9657		72.6546	88.1619		44.8528	88.8466														47.1648	0.06063		44.7372	0.03439
33.813	87.2695		57.8	86.3674		70.8628	88.8087														52.02	0.04892		47.685	0.03343
41.2114	86.3804		68.3774	87.1653		40.2866	87.5839														49.1878	0.05206		42.0206	0.04781
40.8646	87.0815		63.002	90.4822		71.7876	82.4854														45.8932	0.05457		51.4998	0.03676
31.6166	84.2391		54.5632	86.7455		59.8808	90.1459														47.974	0.05317		42.4252	0.03245
41.3848	86.7043		68.782	88.1699		64.2158	79.8471														50.7484	0.05553		50.864	0.04486
40.1132	85.4105		69.3022	85.0419		60.8634	81.3759														55.199	0.05368		41.6738	0.03093
35.836	85.5255		72.828	88.3376		48.0318	88.924														49.13	0.05053		40.9802	0.02243
35.8938	86.252		35.6626	85.3235		56.7596	80.6791														51.3842	0.06154		43.1188	0.04109
36.125	86.1472		56.8174	86.9424		53.176	81.6814														47.9162	0.04887		39.304	0.03336
41.5582	86.6805		38.3792	85.0797		62.3084	80.6291														52.8292	0.05886		39.7664	0.03377
42.5408	86.2263		35.0268	86.04		63.002	90.3878														41.7316	0.06039		37.7434	0.0401
42.5408	86.2263		72.828	82.865		50.1704	89.1358														45.4886	0.0635		38.8994	0.0288
36.4718	86.9405		57.4532	88.2162		57.7422	89.7669														51.153	0.04259		38.8994	0.0288
42.483	84.2146		79.2438	90.6162		65.3718	88.1635														46.7024	0.05234		51.3264	0.07613
35.7782	86.5774		33.524	85.5138		50.5172	88.0922														43.5812	0.03901		36.2984	0.02819
41.8472	84.2744		79.5906	84.8043		48.0896	89.0458														39.7086	0.04373		40.5756	0.04714
38.8994	86.155		66.9902	85.2004		51.9622	89.9965														57.7422	0.07746		40.6912	0.02897
40.8646	86.3498		62.3662	89.397		47.4538	90.1869														49.997	0.06916		48.6676	0.04526
42.3096	85.666		34.3332	86.5122		39.5352	87.9601														41.3848	0.03144		39.6508	0.03354
40.6334	85.781		72.1344	87.7801		56.2394	89.0182														53.2338	0.04662		34.2176	0.03086
35.7204	85.0346		45.1418	86.9056		56.8752	90.0837														46.3556	0.04769		37.4544	0.04735
42.483	86.8649		72.539	89.3919		70.227	88.1378														49.8814	0.06014		43.5234	0.04268
41.0958	87.7492		70.805	84.6461		58.956	88.8765														48.6098	0.04492		41.2692	0.03926
34.1598	85.7031		62.8864	89.1305		58.5514	89.9961														47.4538	0.0492		39.3618	0.042
38.8416	85.6458		76.8162	89.1314		56.7596	81.5612														48.8988	0.05969		40.5756	0.03782
40.171	86.8349		72.25	88.8525		67.6838	79.6053														52.0778	0.06195		39.9398	0.04018
44.3326	87.2179		38.7838	88.9265		86.0064	90.0847														48.6676	0.05741		45.084	0.03748
43.1766	85.6198		56.4706	88.9193		54.2742	91.5916														69.36	0.07424		51.4998	0.03815
43.639	86.7246		77.2786	88.9032		56.7018	83.8837														54.043	0.04926		41.616	0.03845
40.4022	85.7666		59.0138	87.7269		45.084	87.9725														47.9162	0.04775		47.8584	0.04553
36.5874	86.7347		42.5986	85.2048		56.7596	82.1092														42.0784	0.05652		29.8248	0.03541
47.1648	86.2691		67.915	87.0172		58.378	89.1928														50.286	0.05407		51.6154	0.04193
40.2866	86.4293		70.8628	84.2817		56.8752	88.5168														51.2686	0.05342		41.038	0.02736
38.2636	86.4477		76.1804	85.1026		55.3146	90.2974														55.488	0.06383		38.9572	0.02506
42.0784	85.3692		67.7994	89.5489		57.5688	82.3872														48.4364	0.04051		41.7894	0.0179
38.0902	87.6818		52.2512	87.0293		68.7242	90.1271														51.2686	0.04384		37.5122	0.03516
32.1946	85.486		53.0026	87.4736		57.1064	89.8002														45.7776	0.05949		42.0784	0.05235
37.6278	85.537		81.0356	89.7605		63.8112	90.1455														53.3494	0.06273		29.6514	0.02836
35.258	84.5405		36.414	87.3682		51.4998	88.2549														53.2916	0.05225		31.79	0.03308
37.3966	86.4481		71.2674	86.403		52.7714	90.1544														40.8068	0.05044		44.0436	0.03845
36.2984	84.8597		67.5104	88.3331		47.8584	89.7283														42.5986	0.04858		40.3444	0.03238
33.7552	84.9788		79.1282	89.2252		54.5054	90.3468														61.0946	0.07242		38.0902	0.03134
38.8994	84.4399		74.6776	82.6595		40.2866	86.489														50.864	0.06021		35.547	0.03232
34.8534	85.2797		62.8286	82.8722		60.8634	90.2766														54.043	0.04333		40.5756	0.03591
29.6514	85.4405		43.1766	86.2732		62.9442	80.1124														43.7546	0.05884		41.905	0.02758
42.2518	86.8055		64.736	89.4889		63.002	87.25														49.9392	0.05954		39.0728	0.03297
43.5812	84.6683		62.9442	87.7909		59.6496	90.4481														48.7832	0.05632		40.749	0.0421
38.726	86.7102		67.915	85.6886		62.3084	90.8498														51.6732	0.04789		41.1536	0.02724
38.6104	85.0354		80.1686	88.2651		48.0896	88.4015														59.9964	0.04042		37.7434	0.02001
39.2462	87.8077		34.68	86.376		53.6384	80.2113														46.3556	0.07157		42.5408	0.04697
38.7838	86.3738		74.5042	88.3636		36.4718	87.4612														43.4656	0.05398		48.0896	0.05036
38.9572	86.463		83.0008	89.1572		54.621	80.2523														48.6676	0.06052		40.46	0.04702
35.3736	85.7619		57.9734	88.372		60.0542	81.931														55.0834	0.06986		42.5408	0.02986
35.3736	85.7619		31.8478	86.3239		45.3152	88.0482														46.3556	0.05615		38.9572	0.02805
37.1076	85.1185		67.4526	89.8442		39.882	88.7133														50.6328	0.05144		42.1362	0.04449
35.3158	87.0186		64.2736	89.1293		65.8342	89.6646														46.1822	0.09303		36.8186	0.01811
36.8764	87.2002		84.388	84.9677		49.7658	88.943														48.4364	0.06312		41.038	0.03588
36.703	85.9597		76.9896	87.8355		46.9336	88.3996														47.9162	0.07347		43.8124	0.0493
39.7664	86.0026		73.6372	80.5527		57.7422	90.1795														50.1126	0.05859		45.084	0.03734
38.0902	87.3131		66.2388	90.1204		52.9448	88.7599														61.6726	0.04662		42.9454	0.02784
44.6216	85.2748		65.314	88.9545		71.5564	88.549														53.0026	0.04973		48.4364	0.03925
37.3388	85.1842		39.3618	88.3547		48.1474	80.5951														46.1822	0.06199		47.685	0.0407
34.3332	84.5785		42.0206	87.213		50.864	90.1706														44.9106	0.06386		43.4078	0.031
42.2518	86.4284		64.736	88.5603		58.5514	82.2989														49.2456	0.05095		41.905	0.03607
39.0728	86.9648		53.2916	87.7383		46.529	88.4202														57.4532	0.05106		42.1362	0.02735
38.2636	85.5056		58.8404	89.8126		64.2736	80.5895														39.3618	0.05488		40.9802	0.04149
40.1132	85.6208		40.8068	86.1321		55.4302	79.4456														51.3264	0.04165		47.4538	0.04203
38.5526	86.7733		92.0754	87.3112		102.711	84.213														51.3264	0.04763		38.437	0.0313
43.4656	86.2853		54.2164	88.1355		42.5986	87.5549														49.0144	0.06943		44.4482	0.03618
36.2406	85.6575		59.1872	87.7025		50.2282	89.9942														48.9566	0.04606		39.6508	0.03312
39.9976	86.2523		69.649	89.6804		54.6788	79.9426														42.4252	0.04575		46.24	0.04652
37.7434	86.0774		71.3252	85.512		51.153	88.8911														44.9684	0.05105		40.6912	0.03494
36.3562	84.0132		50.6906	87.4431		46.4134	89.8099														50.9796	0.06733		41.2114	0.03792
39.5352	88.0157		50.4594	87.7075		73.984	90.7463														50.9796	0.05616		35.6626	0.02605
40.46	85		65.5452	88.893		69.3022	88.7663														53.0026	0.06066		47.3382	0.02853
41.2692	86.8435		73.1748	86.488		72.7702	89.5853														50.6328	0.09818		42.3096	0.02969
38.0324	85.735		67.5104	88.7638		67.8572	81.3387														48.6098	0.06525		44.3326	0.03708
43.4078	88.0477		80.5154	86.0613		46.6446	88.7583														47.396	0.07117		37.6856	0.04535
43.5812	86.6231		57.3376	88.9748		56.2394	82.2628														49.5924	0.0621		35.7782	0.04217
39.9398	86.9286		75.718	80.2731		69.8802	81.6505														53.0026	0.05828		44.217	0.04323
36.414	85.8521		68.204	82.1808		66.181	82.0868														48.6098	0.04879		50.5172	0.03643
33.6396	86.2787		71.5564	89.2408		69.4756	87.8706														43.061	0.06187		50.4594	0.03896
33.0616	84.7541		64.9094	88.6208		65.025	80.4404														45.0262	0.06841		42.0206	0.03456
46.529	86.5196		78.1456	87.8461		63.2332	80.8912														47.7428	0.06481		45.1996	0.03564
33.2928	85.0482		68.7242	86.681		48.8988	88.0486														49.7658	0.03765		39.7086	0.0328
33.4084	84.5157		47.1648	87.4899		60.7478	81.5265														46.9914	0.06161		41.7316	0.01945
41.7894	87.3601		66.8746	88.7026		56.1816	89.709														48.552	0.06673		44.0436	0.03906
41.7316	86.1898		74.6198	89.356		68.4352	90.2908														47.8584	0.06374		43.6968	0.03095
40.8068	84.6543		59.5918	90.0902		45.3152	87.8538														47.974	0.05287		48.841	0.04036
36.703	86.1771		71.4408	89.554		57.2798	89.9575														39.1306	0.0256		37.859	0.02985
42.8876	86.9138		62.5396	88.5346		49.3612	88.6806														47.974	0.0738		42.483	0.03311
42.194	86.2657		68.2618	89.1479		63.3488	81.9154														58.8404	0.06019		44.217	0.03216
38.0902	85.5637		81.5558	89.6157		43.7546	88.1751														44.9684	0.06175		52.598	0.02908
39.3618	86.4008		74.5042	89.6259		61.9616	89.4957														48.0896	0.05197		46.1822	0.04128
38.437	84.9009		76.1226	87.7347		59.0138	81.6336														46.8758	0.04655		44.2748	0.0346
39.9976	88.105		62.1928	89.89		48.9566	89.1534														40.5756	0.0537		45.7776	0.03599
38.726	86.6047		37.8012	86.2902		39.7664	87.9194														38.6682	0.04673		40.1132	0.03466
39.3618	86.8862		89.4166	89.8974		59.6496	90.756														46.0666	0.0548		38.437	0.03465
36.8186	85.2771		61.3258	89.1499		88.5496	82.4457														54.7366	0.06228		40.6912	0.03263
39.7086	85.0931		59.9386	87.3246		58.5514	81.8498														47.685	0.06582		43.35	0.04626
42.3674	86.1304		50.6906	88.3451		58.667	88.4851														49.8236	0.07175		38.437	0.03465
41.5582	87.6171		71.961	85.8967		41.9628	89.2603														53.465	0.07494		40.6912	0.03263
34.9112	85.7599		65.4296	87.5843		59.6496	82.243														45.7776	0.08223		43.35	0.04626
40.46	86.3746		70.7472	90.3786		58.089	88.6988														54.3898	0.06212		43.6968	0.03618
32.079	83.6488		47.6272	89.1373		80.8044	82.6924														51.0952	0.05571		38.2636	0.03495
43.1188	85.9631		40.5756	87.3473		48.6098	81.3388														42.1362	0.04083		43.1188	0.03927
35.7782	85.2113		58.6092	88.5986		58.7248	83.4897														51.0374	0.05466		51.6154	0.04354
40.5756	86.5068		62.3084	88.7522		59.9964	82.4875														53.5806	0.07234		53.0604	0.04769
45.5464	85.0134		64.447	86.5995		46.0088	89.1983														44.8528	0.05458		40.0554	0.03454
40.749	87.5304		63.291	87.9523		54.1008	89.8011														44.9106	0.04768		44.506	0.0318
35.3736	84.3259		69.5334	87.5497		49.6502	81.9965														51.153	0.05536		41.7316	0.04146
32.2524	83.6701		50.6328	86.2627		56.4706	89.5492														52.6558	0.07537		39.9976	0.04043
34.2754	85.5412		61.4992	87.3545		58.2046	88.935														50.2282	0.05803		50.8062	0.04368
41.6738	86.5144		52.887	85.9076		55.6036	91.3463														51.4998	0.06732		40.5178	0.04292
42.483	85.9791		74.0996	81.9094		58.089	90.4016														49.9392	0.07607		42.483	0.02945
39.593	86.602		56.2394	87.6206		53.4072	78.9788														46.529	0.06058		41.6738	0.0276
32.368	84.8511		77.3942	88.8027		45.7198	88.8012														52.598	0.04764		34.1598	0.03169
32.2524	83.3182		69.36	89.9252		62.2506	89.8233														48.3786	0.06235		39.882	0.02607
41.327	86.3479		79.1282	90.08		55.1412	78.908														46.1244	0.05892		41.1536	0.0251
41.327	86.3479		66.9902	89.0513		64.9672	80.9688														48.3208	0.06583		51.9622	0.05075
36.1828	86.5562		75.0244	84.7451		67.9728	91.0208														47.6272	0.05859		42.483	0.03637
35.836	86.4207		65.1406	87.1825		75.3134	89.6206														61.7882	0.07072		37.4544	0.0324
33.7552	85.1477		65.7764	82.922		44.1592	90.2241														44.9106	0.03881		51.7888	0.05207
37.0498	84.7353		35.0268	86.5814		63.002	88.9919														49.3034	0.05406		43.1766	0.03188
46.4134	87.7351		50.575	88.4768		59.534	81.8561														43.1766	0.04772		41.7894	0.03931
33.5818	84.4368		65.2562	89.0268		34.969	88.183														47.2804	0.05814		49.6502	0.04046
35.7204	86.6608		62.3084	88.6457		62.424	89.139														47.4538	0.05225		35.836	0.0504
38.2058	86.786		62.3662	85.608		53.4072	87.8935														40.46	0.03425		46.0666	0.03722
38.9572	85.5094		36.2984	85.9929		61.7304	81.3536														51.6732	0.05377		42.9454	0.03258
35.0846	87.0186		62.0194	88.4838		71.9032	89.4807														42.9454	0.04433		36.125	0.05015
45.1418	85.3566		67.1058	84.8606		54.4476	83.1069														56.8752	0.06058		42.0784	0.03037
37.859	87.1671		62.3084	87.4948		56.066	85.7382														46.5868	0.04702		41.7316	0.04086
41.616	85.0515		76.2382	88.9243		41.1536	88.0352														46.9914	0.06349		48.1474	0.04577
39.9398	87.0966		99.6472	89.9446		70.6316	83.6789														49.8814	0.05945		39.9976	0.031
39.015	85.9424		62.3662	88.4975		57.0486	89.0867														52.6558	0.05247		39.882	0.02318
31.9634	86.0887		66.759	86.353		58.8982	90.4981														39.015	0.03853		43.928	0.0637
41.1536	86.7539		68.7242	89.2643		55.8348	91.43														51.8466	0.07314		38.6682	0.02763
39.015	85.3504		66.181	88.595		58.2046	89.7275														57.8	0.04734		38.2058	0.02725
35.7782	86.4992		84.388	89.5109		41.7316	88.9434														55.3724	0.05685		42.5408	0.04448
36.2406	84.8557		60.979	89.218		62.8286	81.0816														45.7198	0.06238		42.772	0.04248
34.9112	85.0478		74.7354	90.3363		78.2612	89.2468														49.2456	0.05359		38.437	0.0285
34.7956	85.2959		64.2158	84.2441		53.2338	88.6577														48.0896	0.05076		39.4196	0.03309
34.9112	85.5568		32.2524	85.8653		66.2388	81.419														59.7074	0.05385		38.6682	0.03444
39.7664	85.3414		71.961	83.3136		67.3948	79.7955														51.8466	0.05173		40.6334	0.03522
37.4544	85.2416		78.319	89.1633		46.1822	88.1965														48.3786	0.05242		43.1766	0.03461
32.5414	85.414		42.194	86.7613		62.3084	79.8622														48.2052	0.06178		37.859	0.02764
33.813	84.4305		35.3158	86.4943		47.5694	88.3991														45.1418	0.05637		36.2984	0.04967
36.4718	84.4555		56.5862	88.7446		34.5644	87.2841														40.8068	0.05818		46.5868	0.03573
39.4774	86.8581		69.7068	86.0421		30.345	88.0361														53.3494	0.06482		41.7316	0.03071
32.4258	85.36		60.3432	90.1341		57.7422	90.0085														48.7832	0.06275		41.6738	0.02947
37.6278	85.1339		83.3476	90.359		55.2568	89.3147														66.47	0.04721		41.6738	0.04257
29.1312	83.0666		56.066	89.2844		65.4296	80.5708														44.7372	0.0526		43.1188	0.03774
36.4718	86.2291		67.6838	84.4693		76.6428	89.3764														43.2922	0.03523		41.038	0.03804
38.3792	85.2856		66.5278	88.4954		51.6154	89.5171														50.3438	0.05092		47.2226	0.03363
38.8416	85.0231		82.1916	89.2345		50.7484	89.497														51.4998	0.05828		40.749	0.03934
40.6334	87.2244		63.6956	88.3993		53.6384	89.2057														51.8466	0.06377		43.35	0.03212
47.9162	86.5441		65.892	89.19		62.713	83.2497														46.818	0.07124		41.5004	0.02549
35.6048	84.6607		67.8572	87.4902		48.4364	89.7588														48.552	0.06417		38.7838	0.03471
35.7782	83.8864		33.9864	85.8225		51.0374	81.94														53.5806	0.05605		35.6048	0.0336
36.8186	85.3781		64.2736	84.8328		50.575	88.1164														42.9454	0.04604		42.9454	0.03601
45.7198	87.2318		68.1462	88.5395		38.726	85.8421														52.1356	0.04491		37.5122	0.04218
37.0498	85.3111		49.8814	89.4541		43.6968	88.1766														52.887	0.06476		47.974	0.03124
41.5582	86.7649		61.1524	82.0863		55.488	80.5228														45.7198	0.06297		47.9162	0.03091
39.7086	87.1765		59.9964	87.9051		57.3954	88.9625														46.9336	0.04057		41.7316	0.04453
38.437	85.8275		68.3774	77.9915		43.7546	88.2962														49.5924	0.05775		35.3736	0.02518
36.414	87.2368		71.1518	89.396		50.286	81.4523														42.194	0.06613		45.662	0.03522
34.2176	85.2237		58.956	90.0109		47.1648	87.9196														46.9914	0.05263		36.5296	0.03701
41.038	86.1634		65.1984	88.3847		45.8354	88.7865														49.419	0.05707		50.5172	0.05431
35.258	86.7904		82.7696	90.5618		63.1176	90.0193														49.8236	0.05578		30.9808	0.02846
37.1076	85.3849		55.3146	90.4788		75.3712	89.3238														49.708	0.06199		41.2114	0.01883
40.2866	85.02		58.0312	84.2255		54.2164	89.8154														46.529	0.05807		38.2058	0.04545
40.1132	85.9056		72.3656	89.5643		46.9914	89.3455														45.1996	0.07271		40.3444	0.03033
35.258	85.4964		71.2674	84.2312		69.2444	89.2124														46.24	0.05616		45.8932	0.03722
37.9168	86.1789		71.1518	87.758		53.9274	89.6148														39.593	0.0396		39.2462	0.03788
36.8186	86.0872		64.0424	88.5799		92.6534	90.1198														56.7018	0.05159		37.6856	0.0312
42.3674	85.9915		57.9156	86.7001		59.9964	81.4716														48.552	0.05612		43.1766	0.03814
39.304	85.6524		59.1872	89.019		57.8578	90.7275														57.7422	0.05154		39.9398	0.02414
36.9342	84.483		89.7634	88.5627		47.4538	90.1278														50.4594	0.05409		37.1076	0.04573
40.0554	86.1018		72.0188	80.5772		64.2158	90.0117														53.0026	0.0843		43.5234	0.03227
33.9864	84.386		89.4744	90.2074		45.2574	88.973														46.8758	0.07417		41.7316	0.03921
31.1542	83.9348		71.383	90.5205		48.1474	89.5414														61.268	0.06309		46.529	0.03503
39.6508	85.3069		54.1008	88.3988		41.7894	88.3742														47.2226	0.04825		40.6334	0.03359
40.9224	85.5611		67.4526	84.3304		65.2562	81.8797														51.2108	0.05597		42.8298	0.02938
35.6626	83.4394		80.7466	85.9266		47.685	88.4664														46.4134	0.03871		41.616	0.04273
34.5066	85.9384		80.2264	82.4991		58.667	81.0726														50.3438	0.06147		43.8124	0.02996
43.0032	85.919		48.3208	88.5056		56.5862	89.8188														52.02	0.05869		41.7894	0.03721
39.9398	86.8176		66.0076	89.656		58.6092	88.5513														45.8932	0.05769		44.6216	0.02655
40.9802	86.146		50.864	86.7588		60.69	81.2955														40.2866	0.05462		38.6682	0.03402
38.2636	85.4411		62.3662	89.7106		42.0206	87.9574														64.3314	0.07935		42.0784	0.03351
40.6912	86.1248		68.0884	89.8578		67.1636	83.2858														49.708	0.04934		39.304	0.02479
37.3388	84.4033		92.3644	89.1234		72.3078	90.9155														48.1474	0.05379		42.8876	0.04916
40.171	86.5861		64.5626	86.177		65.0828	80.237														54.6788	0.08049		41.5004	0.03222
35.4892	87.0335		70.4582	88.7338		47.5694	89.7575														51.6732	0.06154		46.7024	0.04329
40.2866	85.4237		66.0654	86.6099		37.6278	85.2989														46.9914	0.07125		42.8298	0.02519
36.4718	86.0085		70.227	87.7322		66.0076	80.271														46.529	0.06262		36.8764	0.02929
40.5756	85.1476		47.5694	87.9224		43.8702	87.8041														53.4072	0.04672		39.1306	0.02932
33.4662	86.23		62.5974	89.2449		53.2916	80.2621														46.6446	0.06469		36.703	0.04264
33.6396	84.9372		56.5284	86.8933		62.5974	90.3296														46.4712	0.04323		43.6968	0.03163
34.6222	85.9017		60.8056	87.0507		57.9734	78.8504														45.5464	0.0574		46.3556	0.03654
36.4718	87.8947		71.4986	89.3111		53.9852	81.3908														51.153	0.08265		51.0374	0.05088
33.0038	86.1537		54.9678	87.3233		34.2176	87.3638														48.4942	0.06003		42.772	0.03998
36.703	87.1951		69.9958	89.6821		64.1002	83.3739														40.8068	0.04815		41.3848	0.0388
36.414	85.7691		65.5452	82.7933		60.6322	81.8372														49.3612	0.03953		43.061	0.04366
35.9516	84.263		37.281	84.7241		43.8702	89.7218														51.3842	0.07738		42.772	0.03998
48.0896	87.2273		43.5812	86.2999		51.3842	89.196														41.7894	0.0612		43.061	0.04366
37.5122	87.5353		37.1076	85.9117		54.2164	88.1101														34.7956	0.03698		42.194	0.04468
46.4712	86.1016		34.969	83.258		48.6098	88.2104														53.8118	0.04863		50.6328	0.03638
36.5874	87.9415		69.5334	89.0467		33.7552	85.6685														49.5924	0.0708		41.3848	0.04577
37.281	86.3328		102.595	90.8663		41.905	89.4996														43.8702	0.0474		40.749	0.03934
35.7204	85.8503		75.14	87.6881		54.332	89.3742														46.1244	0.05013		43.5812	0.05215
34.2176	85.2665		72.8858	85.5127		53.9852	88.1359														43.928	0.07073		41.5582	0.02529
40.9802	87.8834		68.6664	88.0038		51.5576	89.6621														54.5054	0.03547		44.7372	0.02945
44.6794	86.3495		78.7814	84.789		50.8062	87.7828														42.5986	0.04638		35.1424	0.03315
36.6452	84.0851		77.163	84.7896		50.8062	89.905														44.795	0.06466		47.974	0.04437
36.8186	85.45		60.7478	88.656		46.3556	90.2535														48.0896	0.05062		40.6912	0.03439
45.8932	87.7691		31.9056	85.5015		48.4942	88.3154														43.4078	0.0524		39.015	0.03529
41.327	86.0114		64.9094	85.0738		54.7366	82.4763														55.2568	0.06055		50.4594	0.03798
38.726	87.1979		75.6024	89.7706		55.8348	84.036														47.6272	0.05364		50.864	0.04574
41.1536	86.7247		80.631	89.732		48.4942	89.6672														43.8702	0.04446		43.5812	0.03119
40.9224	85.5677		70.805	87.2189		63.2332	90.9257														49.0144	0.06797		40.5178	0.0392
39.9398	86.1619		70.0536	90.0399		90.168	90.5517														48.7832	0.04929		41.6738	0.03455
40.4022	87.8933		66.5856	88.7684		51.3264	88.9939														51.7888	0.05988		40.9224	0.02749
39.7664	84.7325		70.4582	90.0941		55.3146	85.5217														45.8932	0.04975		45.4308	0.03723
37.5122	86.9504		81.3246	89.9006		63.7534	78.9971														42.772	0.05062		47.6272	0.04815
33.7552	85.8398		78.3768	89.196		55.2568	89.5626														47.107	0.0509		36.7608	0.035
37.7434	85.9146		68.6664	88.0323		62.0772	82.0593														50.1126	0.0611		36.2984	0.03759
35.6048	85.6151		44.506	86.8298		44.1014	88.9724														53.0604	0.0465		47.9162	0.03275
35.6048	85.6151		67.337	87.3505		43.1188	88.7221														48.263	0.0462		45.2574	0.03658
34.9112	87.4701		55.777	88.938		52.3668	89.6629														50.1126	0.04142		47.8006	0.0424
42.8298	85.917		48.1474	87.5566		55.3146	80.1654														51.8466	0.0946		47.6272	0.04831
38.726	85.4287		80.1686	85.7322		52.1934	89.4117														49.2456	0.04881		48.0896	0.05756
44.217	87.8246		69.7646	88.6631		59.9386	89.6219														47.5116	0.06735		37.1654	0.02047
32.368	85.7877		74.1574	89.4388		62.424	82.0342														46.5868	0.06172		41.9628	0.03762
39.593	87.5652		70.1692	89.4342		54.5632	88.3518														41.5004	0.05908		35.7782	0.02557
38.8416	86.06		65.603	89.7304		66.9902	80.6037														51.2686	0.07342		35.7782	0.02456
32.079	86.7662		80.053	86.0745		60.979	89.9719														44.2748	0.0539		47.685	0.04122
31.5588	85.4506		62.713	90.0486		59.3606	90.2499														46.8758	0.06125		41.6738	0.03714
43.2922	86.4125		59.0138	87.9264		52.6558	80.916														46.1244	0.06364		38.6682	0.04694
42.1362	87.0657		72.5968	89.2162		62.5974	89.7771														48.552	0.05861		41.2692	0.02728
41.2114	87.4496		70.6894	88.8555		45.8932	90.0246														48.8988	0.06837		43.7546	0.03372
42.2518	86.7261		70.8628	82.2286		48.263	89.1764														44.1592	0.04691		52.1934	0.05536
38.9572	85.8476		40.5756	86.0407		52.5402	90.525														49.13	0.07153		34.7378	0.0279
35.7204	83.234		38.148	86.1859		63.002	80.2321														53.6384	0.06157		37.5122	0.04476
38.6682	85.9326		62.1928	88.2427		64.9094	90.505														49.8814	0.04521		42.8876	0.0453
35.4314	84.8198		59.7652	88.46		53.2338	82.5964														52.4246	0.06224		45.1996	0.03752
37.0498	86.4087		92.0754	90.3303		45.5464	88.7433														51.7888	0.09195		39.9976	0.02695
40.2288	86.9816		65.8342	87.514		53.8696	89.457														44.217	0.06916		40.6912	0.0543
38.0324	88.0908		75.1978	84.6879		59.8808	82.8357														43.9858	0.03595		45.1996	0.04627
35.0268	84.1584		61.0946	84.641		61.2102	80.0762														30.1716	0.05114		50.1704	0.04156
34.5066	85.6816		75.2556	87.909		54.7366	83.1196														53.9274	0.06942		40.749	0.02592
35.0846	84.6814		73.984	90.6544		61.4414	91.2185														42.9454	0.05456		44.0436	0.04141
33.235	86.0345		73.6372	88.968		51.9622	88.9933														37.6856	0.03557		47.9162	0.04284
39.4196	86.4599		60.979	88.4885		47.8584	89.9686														50.5172	0.05776		38.726	0.03154
35.9516	86.7904		69.9958	89.7341		55.8926	79.6311														53.5228	0.07095		41.7316	0.03374
36.5296	86.751		58.4358	89.9579		47.1648	89.1234														47.1648	0.03363		44.6216	0.03413
31.212	85.6104		73.9262	88.7361		54.8522	90.3496														45.084	0.04999		40.46	0.03888
43.1188	86.0661		61.6148	88.74		30.923	87.1881														42.194	0.05981		47.7428	0.03769
30.2872	85.1053		98.9536	88.9098		63.4066	81.1467														54.9678	0.0798		35.9516	0.03669
36.414	85.7217		60.9212	88.4737		50.0548	88.7344														45.1418	0.05817		38.3792	0.03263
40.749	86.1899		68.2618	85.9349		49.419	89.7185														46.24	0.05676		39.1884	0.02399
41.038	84.9258		88.434	86.0542		50.2282	89.587														38.0902	0.04972		51.3264	0.04145
31.7322	84.9919		76.7584	86.7307		78.3768	90.9542														50.8062	0.04477		39.1884	0.02399
34.7956	86.1552		63.58	88.5773		56.4706	89.948														54.7944	0.07779		38.4948	0.03009
32.4836	85.0009		67.337	84.8876		47.2804	89.4739														49.9392	0.06576		41.2692	0.02623
38.8416	86.1403		59.7652	88.7987		48.263	88.0426														45.4308	0.04448		40.6912	0.03258
33.0616	83.6582		77.8566	88.013		63.0598	81.209														60.112	0.0515		35.7782	0.03764
37.6856	85.2435		32.1368	86.0314		44.9106	87.6314														45.5464	0.05021		44.6216	0.04002
42.0784	86.5688		64.8516	89.1289		61.1524	91.4444														46.529	0.06194		45.1996	0.0318
36.8764	85.8156		61.4414	88.5185		48.2052	88.8745														45.373	0.07577		37.9168	0.02708
35.4314	86.6597		66.181	84.3831		71.961	80.7475														63.291	0.06162		41.905	0.03167
39.9398	86.6791		73.9262	73.3413		67.2792	80.8974														67.048	0.05761		40.171	0.05128
40.5756	86.2371		67.7994	83.0705		67.7994	89.8351														40.171	0.04838		39.4196	0.04009
43.1766	87.8588		60.9212	87.9143		66.47	91.0664														44.5638	0.06469		39.4196	0.03697
29.8826	84.5183		91.035	89.0474		45.4308	88.9144														58.1468	0.06092		40.3444	0.03698
42.4252	86.1028		38.9572	86.6578		61.6148	89.1095														40.171	0.03877		41.5004	0.02927
37.6856	83.5729		67.6838	86.6099		54.5632	89.5109														46.1822	0.0554		42.8298	0.02858
32.1368	86.2946		54.621	87.5479		57.9734	81.8851														39.2462	0.03997		39.2462	0.03605
39.2462	86.121		85.833	86.1152		56.2394	89.4483														61.0946	0.05132		48.0318	0.04764
38.3792	87.5686		71.0362	90.018		49.5346	90.6033														45.6042	0.05344		37.1654	0.01955
38.3792	88.8922		42.6564	89.0057		94.3874	90.7842														46.0666	0.04404		42.5986	0.04546
35.9516	84.6391		59.245	89.7973		51.3264	90.7083														43.5234	0.04693		49.8236	0.04357
44.795	84.7854		77.3364	81.1288		59.0716	89.71														47.107	0.05923		45.4886	0.03404
35.0268	85.2403		58.5514	87.1078		46.9336	89.3924														52.4824	0.04383		34.2754	0.0212
33.7552	87.9183		61.9616	86.5785		58.2624	87.0929														47.0492	0.05749		36.8764	0.02331
34.7956	85.34		52.1934	88.7482		52.9448	81.7278														47.4538	0.06426		37.8012	0.02441
35.0846	83.9466		64.6204	86.7363		55.199	90.4978														57.6266	0.05804		37.4544	0.02955
35.8938	83.975		48.1474	86.5389		63.6378	80.5491														50.3438	0.06578		39.0728	0.0473
36.0672	85.7208		44.8528	87.1388		71.961	88.5941														32.7148	0.02779		39.0728	0.06315
38.3792	85.767		60.69	88.5691		49.5924	89.8744														43.0032	0.06137		41.7316	0.04269
34.7378	86.7266		59.9964	89.0524		51.9622	89.106														46.9914	0.05701		40.5178	0.03543
41.0958	87.1818		39.4774	87.3922		48.2052	87.1563														50.6328	0.0582		39.1884	0.03372
34.969	85.4656		66.8746	88.9718		94.0984	90.6349														48.4364	0.04902		38.5526	0.02974
34.5644	83.7924		66.5856	88.1691		49.5346	89.1354														52.0778	0.06305		33.0616	0.0257
35.6626	84.6192		67.9728	90.6779		57.8	89.0548														48.1474	0.06415		41.9628	0.0299
44.7372	87.1453		61.9038	87.2797		56.2394	90.4654														52.4824	0.06877		43.7546	0.02766
37.3388	86.1577		54.4476	88.0274		60.6322	88.6071														44.3326	0.05394		45.084	0.03862
33.0616	86.8711		34.68	85.0365		52.7136	88.9624														49.997	0.07509		44.4482	0.03399
38.0324	87.3881		68.493	87.1795		52.6558	81.5244														52.2512	0.06039		40.9802	0.03341
37.3388	86.1245		75.7758	88.8765		64.7938	90.6073														54.5054	0.06033		31.9634	0.03196
33.813	85.0058		41.6738	86.9202		53.0026	89.1838														41.5004	0.04212		45.8354	0.03813
39.9976	87.4126		72.8858	84.2453		49.9392	89.5799														52.6558	0.04618		42.5408	0.03062
37.57	86.65		71.0362	84.0843		70.516	83.8991														47.3382	0.04504		42.4252	0.03891
40.3444	85.0323		60.69	77.9339		64.158	87.3738														41.7316	0.05924		44.217	0.0367
32.3102	85.4667		66.2388	87.5612		57.0486	82.3298														48.3786	0.0388		35.7204	0.04852
35.547	85.6432		89.9946	89.5731		53.2916	82.3869														46.3556	0.03905		38.2058	0.04757
42.3674	85.8474		72.7702	90.2055		67.3948	80.6977														45.1418	0.04887		52.7136	0.03904
37.9168	85.7531		103.693	86.9071		36.0672	88.1719														67.5104	0.07994		41.5004	0.03904
38.437	85.2543		61.3258	89.3511		76.296	89.7518														46.4712	0.06317		40.749	0.02653
38.437	85.2543		37.1076	84.9036		59.534	83.0241														47.9162	0.06278		47.5116	0.05865
36.6452	86.2146		65.314	89.1234		49.708	88.8084														38.2058	0.06096		40.3444	0.04281
37.1076	86.3311		47.4538	87.0491		49.8814	89.4319														38.0902	0.03456		45.084	0.03813
36.8764	85.6021		63.2332	89.6967		64.5626	81.9738														43.061	0.05267		42.1362	0.03925
33.7552	86.2515		73.2904	88.3332		61.7304	89.2721														46.7602	0.06343		47.2226	0.04176
41.5004	85.1607		62.3662	89.8353		65.0828	90.3384														44.3904	0.0508		40.6334	0.02597
36.3562	86.2573		60.112	87.5215		58.0312	89.9242														46.9336	0.04946		48.7254	0.03475
29.767	83.1388		63.3488	86.7166		44.8528	86.8432														42.772	0.05514		46.3556	0.03225
36.5296	85.8678		73.6372	86.0798		42.9454	87.7483														49.0722	0.05557		43.2344	0.04237
40.6334	86.0108		80.92	90.0724		52.1934	89.1915														49.6502	0.06039		40.6912	0.03914
32.0212	85.132		69.071	89.3891		58.7248	89.9509														58.956	0.0479		32.079	0.02412
35.7204	87.0997		36.9342	85.6687		56.4706	81.4815														55.488	0.06694		42.3096	0.03084
39.4196	86.1443		51.4998	87.423		56.066	89.6135														53.2338	0.04572		35.4314	0.04664
45.084	86.6362		63.1176	89.8807		48.552	88.8297														46.5868	0.04934		47.107	0.03897
39.5352	85.8667		65.3718	88.8396		44.4482	88.8665														42.8876	0.04881		36.4718	0.02254
42.8876	87.3858		57.8	87.7243		66.0654	90.2937														44.4482	0.05078		44.5638	0.03737
38.3792	86.6414		67.7994	85.3103		69.36	75.9185														46.9336	0.06078		45.7776	0.02922
35.9516	87.7596		66.181	89.21		46.7024	88.7592														43.2344	0.05502		40.2288	0.03019
37.0498	87.7786		63.2332	85.0615		49.3034	89.797														44.795	0.05941		45.1418	0.03493
[truncated: 10,935 more rows]

## Sheet: Figure4-Supplements
Supplement1 (all population data in Figur4-sourceData, normal in Figure1-sourceData)
mean and SD of population medians per cell type for normal, ALL, and AML (see also Figure1E)
	cell size	SD cell size	deformation	SD deformation	E	SD E
	[µm^2]	[µm^2]	[]	[]	[kPa]	[kPa]
ALL blasts	48.3931	4.22702	0.04576	0.01704	0.615	0.12401
AML blasts	63.4603	5.6079	0.04596	0.00904	0.89929	0.17937
lymphocyte norm	38.448	1.31384	0.04321	0.0042	< 0.5	/
neutrophils norm	66.8636	1.73136	0.07167	0.00646	0.72348	0.02674
monocytes norm	64.4305	2.87523	0.06011	0.00924	0.76738	0.05161
eosinophils norm	69.5059	2.92812	0.07277	0.00879	0.7579	0.04262
p-values for comparing:
	deformation	cell size	E
ALL / AML			0.03764
ALL / lymphocytes	0.88215	0.00185
ALL / neutrophils			0.11949
ALL / monocytes			0.02611
ALL / eosinophils			0.05864
AML / neutrophils	9.63509e-05	0.06711	0.00737
AML / monocytes	0.00383	0.61419	0.05274
AML / eosinophils	0.000148544	0.00737	0.02766

## Sheet: Figure4-sourceData
individual blast cell populations in AML and ALL (Figure4D and Figure4-Supplement1)																																	individual blast/lymphoid cell populations in ALL treatment time course (Figure4H)
ALL												AML																					day1			day2			day3			day4			day5			day6
																																	cell size	deformation		cell size	deformation		cell size	deformation		cell size	deformation		cell size	deformation		cell size	deformation
patient1			patient2			patient3			patient4			patient1			patient2			patient3			patient3 relapse			patient4			patient5			patient6			[µm^2]	[]		[µm^2]	[]		[µm^2]	[]		[µm^2]	[]		[µm^2]	[]		[µm^2]	[]
cell size	deformation		cell size	deformation		cell size	deformation		cell size	deformation		cell size	deformation		cell size	deformation		cell size	deformation		cell size	deformation		cell size	deformation		cell size	deformation		cell size	deformation		42.6709	0.05199		40.1132	0.05151		42.8298	0.05958		50.286	0.03448		40.5756	0.04035		35.1424	0.02858
[µm^2]	[]		[µm^2]	[]		[µm^2]	[]		[µm^2]	[]		[µm^2]	[]		[µm^2]	[]		[µm^2]	[]		[µm^2]	[]		[µm^2]	[]		[µm^2]	[]		[µm^2]	[]		50.5027	0.06352		47.8006	0.04453		43.639	0.04392		53.465	0.05151		46.7024	0.04348		44.1592	0.04416
50.286	0.07544		43.928	0.03604		49.708	0.02413		49.1878	0.04031		65.4874	0.03297		79.475	0.06459		68.8398	0.04132		63.58	0.02925		68.8398	0.07728		49.7658	0.05158		56.4706	0.0898		37.6782	0.04716		47.685	0.05102		40.3444	0.03109		45.373	0.03676		41.0958	0.05942		39.7664	0.02938
43.8124	0.07397		40.5756	0.03389		47.1648	0.02181		50.1126	0.04155		82.076	0.04848		79.475	0.06459		69.2444	0.01977		52.02	0.03246		68.8398	0.07728		75.7758	0.04889		62.4818	0.03767		40.8708	0.04908		44.4482	0.06652		35.6626	0.02085		48.3208	0.0472		47.8006	0.06211		48.3786	0.04983
49.708	0.07272		46.3556	0.04596		50.4016	0.02305		43.4078	0.04337		63.869	0.03645		69.0132	0.05042		68.782	0.04647		63.4066	0.03314		55.488	0.08159		55.0256	0.06591		55.9504	0.0421		49.7194	0.04523		52.598	0.06298		43.639	0.04456		45.373	0.03676		43.1188	0.03583		38.2636	0.02674
45.6042	0.05535		44.506	0.03229		52.1356	0.03283		42.8298	0.04534		70.2848	0.04382		77.2786	0.02345		72.1344	0.05758		63.4066	0.03314		55.8926	0.07217		93.6938	0.02506		59.534	0.03643		45.5797	0.05604		47.685	0.05102		44.8528	0.03984		48.3208	0.0472		48.0896	0.03238		40.2288	0.03185
43.928	0.0691		70.9784	0.0449		43.2344	0.03531		49.1878	0.04031		49.3034	0.03446		69.4178	0.0546		79.4172	0.02743		66.8168	0.04065		67.048	0.08839		62.2506	0.049		59.7074	0.055		45.0841	0.06548		44.4482	0.06652		48.4364	0.04073		41.2114	0.04015		48.7832	0.0534		49.13	0.04892
76.296	0.03112		51.0374	0.04367		36.5874	0.03444		50.1126	0.04155		63.8112	0.02845		74.562	0.04662		69.5912	0.02606		55.199	0.02263		55.3724	0.06953		64.2158	0.06777		58.378	0.02846		44.9569	0.05481		52.598	0.06298		43.639	0.04392		50.9796	0.04244		48.9566	0.03544		47.1648	0.04929
53.5806	0.07632		48.8988	0.03581		34.5066	0.01253		43.4078	0.04337		81.0934	0.043		70.3426	0.07299		83.0586	0.04286		61.0368	0.04039		58.7826	0.05754		57.3376	0.04762		54.1586	0.0419		51.3585	0.04875		45.4308	0.04219		40.3444	0.03109		40.2288	0.03818		40.5756	0.04035		40.2288	0.03185
53.5806	0.07632		51.153	0.05392		32.5414	0.03105		42.8298	0.04534		101.208	0.07353		80.9778	0.03879		63.1754	0.03132		73.2326	0.05582		49.3034	0.06245		51.8466	0.04077		76.4694	0.05351		44.5602	0.05264		57.7422	0.06175		35.6626	0.02085		45.8932	0.03989		46.7024	0.04348		49.13	0.04892
52.5402	0.07531		46.2978	0.04509		41.327	0.02321		46.7602	0.04697		79.9374	0.06166		85.0238	0.05198		63.4066	0.05071		64.8516	0.02303		65.025	0.05674		69.7068	0.05696		86.411	0.04887		47.4003	0.05353		49.0144	0.04288		43.639	0.04456		48.263	0.04081		41.0958	0.05942		51.153	0.05219
52.7136	0.07252		46.9914	0.07462		37.3966	0.03309		46.7602	0.04697		58.378	0.04342		73.984	0.03176		75.14	0.0497		85.4862	0.03825		50.286	0.04975		50.7484	0.03633		75.1978	0.05944		58.0333	0.06176		47.6272	0.05788		44.8528	0.03984		45.5464	0.03792		47.8006	0.06211		43.1188	0.03327
56.0082	0.08429		64.447	0.06839		47.396	0.04531		37.1076	0.04407		88.2028	0.04893		82.5384	0.03126		52.3668	0.03545		59.3028	0.03319		50.6328	0.07415		51.0374	0.03593		62.5396	0.06102		42.8438	0.04751		46.6446	0.04907		48.4364	0.04073		43.5234	0.03478		43.1188	0.03583		52.598	0.04442
61.3258	0.04504		55.5458	0.1143		56.4706	0.03004		38.5526	0.03271		66.8746	0.03515		64.2158	0.05556		51.3842	0.02748		57.0486	0.03355		59.5918	0.07645		52.3668	0.05115		66.5278	0.05126		45.3293	0.05926		46.9914	0.05824		49.997	0.05206		42.5986	0.0444		48.0896	0.03238		45.1996	0.04065
55.0256	0.06805		38.7838	0.02426		40.5756	0.02771		41.7316	0.03044		62.424	0.03194		76.1226	0.0514		69.2444	0.04649		62.7708	0.02741		57.0486	0.06789		54.91	0.04169		79.9952	0.11188		49.2172	0.05071		40.749	0.04555		42.9454	0.06265		42.772	0.03067		39.6508	0.02913		50.0548	0.04146
50.575	0.09268		43.928	0.04334		42.3096	0.04561		42.5986	0.05823		66.0654	0.04827		65.025	0.02918		48.6676	0.06397		71.0362	0.03838		56.933	0.03868		47.7428	0.03664		59.4762	0.04424		44.3151	0.05801		51.731	0.04547		42.9454	0.02809		44.506	0.03409		48.2052	0.04538		46.7602	0.04385
41.2114	0.05775		56.355	0.03709		44.3326	0.01804		50.2282	0.04173		49.708	0.02949		85.4862	0.08122		66.0654	0.0421		59.534	0.03369		63.1754	0.07932		56.933	0.02687		66.9324	0.06871		46.6702	0.0494		46.6446	0.04907		45.084	0.05586		42.1362	0.05764		46.4134	0.03117		41.9628	0.03338
45.2574	0.06668		59.9964	0.04603		47.7428	0.02832		58.6092	0.05872		69.2444	0.03923		74.0996	0.05002		61.2102	0.02474		63.4644	0.04296		60.2276	0.08367		64.2158	0.03355		67.3948	0.04503		45.0293	0.04782		53.8696	0.07289		39.593	0.03214		51.4998	0.04518		43.2344	0.04482		39.9976	0.03259
45.2574	0.06668		65.7764	0.05548		43.4656	0.02134		45.4308	0.05246		78.0878	0.06069		93.2892	0.0565		73.2904	0.06059		74.2152	0.02911		64.6204	0.06195		58.2046	0.02497		46.529	0.03686		44.6311	0.04928		57.222	0.06512		52.598	0.04128		53.754	0.04792		44.9106	0.05651		40.171	0.02704
52.5402	0.06302		64.3314	0.06214		47.9162	0.03052		59.823	0.04781		49.7658	0.03711		91.9598	0.05986		63.6956	0.06123		66.4122	0.05004		51.2108	0.07449		53.9274	0.0542		56.4128	0.04198		45.1752	0.05378		47.2804	0.07073		40.9224	0.03537		49.4768	0.04521		42.483	0.05004		42.7142	0.04216
45.5464	0.05504		50.4016	0.05683		48.8988	0.02226		39.1306	0.04689		57.4532	0.04143		74.3308	0.05466		64.3892	0.0331		62.9442	0.03112		57.1642	0.05058		56.4706	0.04344		68.493	0.0498		48.3937	0.06936		53.0604	0.0607		42.8298	0.03772		45.3152	0.03457		49.9392	0.03896		50.1126	0.07687
50.286	0.07168		45.951	0.05923		41.2114	0.01836		35.4314	0.03458		55.2568	0.0422		85.7752	0.07508		48.4364	0.01609		79.4172	0.04983		55.199	0.09036		59.5918	0.05196		68.493	0.05148		42.157	0.04194		48.6676	0.05773		49.2456	0.0403		43.928	0.03448		42.8876	0.03309		46.529	0.0498
49.4768	0.06953		49.7658	0.04796		43.0032	0.02045		46.24	0.04574		58.667	0.03148		83.4054	0.08787		60.5166	0.03674		78.2034	0.04989		61.7882	0.09305		54.1586	0.03744		79.5906	0.06278		42.1621	0.03923		54.5632	0.06435		53.2338	0.037		40.8646	0.0523		43.928	0.06089		50.1126	0.07687
49.9392	0.05688		53.8696	0.04226		41.5582	0.01558		42.5986	0.04699		75.0822	0.033		68.8976	0.05271		59.4762	0.02052		68.204	0.02681		55.0834	0.05391		62.424	0.02673		75.14	0.05806		46.5409	0.03747		45.4886	0.06941		42.2518	0.03398		46.8758	0.06069		47.974	0.0315		40.8068	0.04155
53.465	0.07509		49.419	0.05734		51.153	0.04382		45.4886	0.05195		55.488	0.0389		76.9896	0.05998		96.815	0.05606		64.9094	0.03744		58.3202	0.04964		60.0542	0.04186		55.6614	0.05489		49.6528	0.05028		39.304	0.03229		52.309	0.0592		52.02	0.05689		45.6042	0.04558		38.8416	0.04738
47.7428	0.06644		44.6794	0.0368		42.483	0.02731		37.6278	0.04438		103.52	0.04971		64.5048	0.0374		73.5794	0.07907		57.1064	0.03587		53.465	0.06226		56.066	0.03283		83.0008	0.03515		47.4277	0.06531		47.4538	0.04532		52.1934	0.03132		49.4768	0.04309		48.0896	0.04553		42.483	0.02751
48.7254	0.07777		50.3438	0.05155		42.7142	0.05355		53.465	0.05087		60.69	0.03907		74.1574	0.03727		56.066	0.01976		70.4004	0.04529		58.7248	0.12438		54.043	0.05406		52.9448	0.06771		58.9069	0.05398		50.1126	0.0522		41.1536	0.03949		47.2804	0.05688		44.4482	0.04176		52.4824	0.03966
46.818	0.04093		65.314	0.06554		55.6614	0.01445		41.7316	0.03068		86.0642	0.04688		57.8578	0.04911		59.5918	0.02157		52.02	0.03103		60.9212	0.06246		53.9852	0.06301		71.094	0.04118		41.5641	0.04858		50.9218	0.06154		48.3208	0.04314		46.4134	0.03225		50.0548	0.03955		39.8242	0.03523
44.6216	0.06905		40.1132	0.02154		48.6676	0.04142		41.2692	0.05344		55.0256	0.03137		72.6546	0.03961		80.1686	0.05318		93.5782	0.03588		68.3774	0.07774		63.7534	0.05429		67.2792	0.05708		50.7931	0.04774		39.6508	0.05417		46.6446	0.04015		43.061	0.0427		41.9628	0.037		40.2288	0.02676
46.9336	0.07088		50.9218	0.04579		42.1362	0.01757		43.9858	0.05091		68.782	0.04659		85.544	0.09744		58.7826	0.03294		76.7006	0.03506		68.3196	0.10447		56.7018	0.06449		61.4992	0.06488		50.4787	0.06982		45.084	0.03698		39.7086	0.02999		41.2692	0.03926		46.0088	0.04167		46.8758	0.04284
43.35	0.09034		55.9504	0.05173		40.3444	0.02983		45.373	0.04995		64.447	0.04882		74.9666	0.03575		56.7018	0.03251		66.5278	0.03281		63.4644	0.10847		57.8578	0.05286		50.6906	0.05568		57.416	0.04507		53.6384	0.0552		46.9914	0.03731		39.5352	0.03404		42.9454	0.05323		43.0032	0.02291
45.2574	0.06928		52.4246	0.04313		55.777	0.03852		73.406	0.05452		62.5974	0.0407		74.2152	0.03953		66.8168	0.0507		66.5856	0.04223		71.3252	0.09704		69.9958	0.05024		49.5924	0.07402		45.0373	0.04544		50.6906	0.05539		47.3382	0.03805		40.46	0.04914		48.552	0.04589		42.6564	0.02272
55.3146	0.05435		46.0088	0.05702		45.5464	0.02642		44.795	0.03961		67.1058	0.03395		89.1854	0.0674		70.0536	0.0439		61.3836	0.02454		54.3898	0.05694		73.9262	0.04133		52.4246	0.05268		52.5846	0.06438		57.8578	0.05844		38.5526	0.06186		45.084	0.03709		44.1014	0.04936		42.9454	0.03588
46.529	0.05448		58.089	0.03995		50.4594	0.03587		46.2978	0.05625		77.8566	0.03662		69.938	0.0552		66.181	0.04263		74.9088	0.06154		55.6036	0.04189		64.6204	0.06931		52.5402	0.05277		50.1352	0.06511		45.084	0.06297		41.5004	0.02681		40.8068	0.02597		52.887	0.05636		55.1412	0.04307
59.534	0.07865		58.4358	0.05761		56.9908	0.03178		48.2052	0.03436		59.4184	0.05409		73.8684	0.07371		65.7764	0.03206		71.8454	0.03268		60.8634	0.08271		58.5514	0.04804		62.6552	0.03449		35.9071	0.0309		49.6502	0.05272		49.1878	0.03501		45.5464	0.03034		39.6508	0.0267		37.57	0.02796
55.2568	0.08654		61.9038	0.06661		34.68	0.03384		50.2282	0.05731		59.0138	0.02804		65.6608	0.03995		59.5918	0.04853		61.4992	0.07033		66.7012	0.07757		54.332	0.06125		60.5166	0.05094		59.4795	0.08335		49.5924	0.04873		44.217	0.04402		41.3848	0.04028		37.281	0.06044		42.7142	0.03455
46.24	0.06055		44.9106	0.0559		43.7546	0.03856		51.8466	0.04942		81.7292	0.05406		83.5788	0.06311		50.1126	0.02254		64.6782	0.038		59.3606	0.0667		54.9678	0.05269		52.8292	0.04572		45.3918	0.06191		46.4134	0.04868		43.639	0.05		41.4426	0.03878		38.3792	0.04205		38.9572	0.03451
51.0952	0.07405		56.8174	0.05496		55.6036	0.03631		55.7192	0.04675		85.7174	0.0522		66.9324	0.02957		60.4588	0.0353		73.0014	0.05127		58.8982	0.09998		59.3028	0.03811		54.7944	0.06045		48.3816	0.06048		49.6502	0.05225		44.2748	0.05343		48.7254	0.0476		41.0958	0.03155		46.1822	0.04541
46.529	0.06846		43.061	0.03798		40.2866	0.03362		38.7838	0.03771		67.3948	0.03905		80.92	0.03205		80.92	0.03406		63.6956	0.04687		61.6726	0.06672		60.1698	0.05195		57.6844	0.03569		53.8447	0.06297		49.0722	0.04908		40.749	0.02909		43.8702	0.02188		45.7776	0.03536		41.3848	0.02918
48.841	0.07323		45.7776	0.04445		37.1654	0.02886		54.2742	0.05835		59.9386	0.04082		74.9666	0.02906		49.8814	0.02745		61.1524	0.03997		53.6384	0.07443		49.3612	0.03135		64.3892	0.05503		47.6414	0.06111		55.6036	0.04536		43.4078	0.03939		37.9746	0.03149		43.928	0.03232		43.061	0.02872
62.3084	0.07006		47.4538	0.03985		46.3556	0.02606		46.4134	0.04336		46.4712	0.03961		62.7708	0.04152		80.9778	0.05145		62.8286	0.04433		53.5228	0.05767		61.4992	0.03736		55.9504	0.06172		39.5973	0.05259		52.9448	0.06549		45.4308	0.0367		47.396	0.04894		45.662	0.04326		43.1188	0.03224
43.2344	0.05044		41.616	0.04517		44.6794	0.01469		59.9386	0.07833		81.787	0.0492		64.2736	0.02272		54.2742	0.04265		76.9318	0.05391		68.3196	0.07474		55.3724	0.06144		56.355	0.04558		43.8998	0.06042		54.332	0.05465		47.6272	0.0422		45.7198	0.04537		45.5464	0.04262		50.6906	0.03642
51.0374	0.07927		63.9268	0.04246		44.6794	0.03321		46.8758	0.03992		67.4526	0.02682		69.649	0.07106		72.0766	0.12077		64.1002	0.0472		57.4532	0.05419		62.7708	0.0546		59.823	0.05216		50.5874	0.05903		48.8988	0.08395		51.0952	0.05839		42.3674	0.04439		44.795	0.05658		41.2114	0.03059
43.5234	0.06755		56.4128	0.04569		46.1244	0.02686		45.8354	0.05077		71.672	0.06106		52.0778	0.0508		60.69	0.04212		52.02	0.01654		50.1126	0.07206		68.1462	0.04677		50.4016	0.02491		47.5357	0.06447		53.5228	0.05073		45.373	0.03473		47.8584	0.0333		45.3152	0.0459		45.8932	0.03673
41.4426	0.06455		56.1238	0.05135		41.2692	0.02055		59.4762	0.07483		71.094	0.05655		64.9094	0.02542		71.4986	0.04599		63.58	0.03551		52.309	0.06425		52.0778	0.0715		49.13	0.03421		42.0199	0.04287		42.8876	0.04738		34.3332	0.03342		40.6334	0.02307		56.5284	0.04124		40.46	0.03432
68.0306	0.04587		54.2742	0.07053		39.1884	0.03465		54.91	0.06396		55.2568	0.03648		63.869	0.05216		71.2096	0.03017		70.805	0.04698		53.8696	0.06285		54.8522	0.04691		62.0194	0.04899		50.4472	0.05804		46.0666	0.0517		42.3674	0.0471		44.5638	0.03025		42.9454	0.04264		41.6738	0.03745
57.7422	0.06043		66.8746	0.08095		41.1536	0.03393		51.6154	0.05717		78.0878	0.05723		75.8336	0.05161		61.0946	0.02404		63.1176	0.03448		62.2506	0.09699		56.1238	0.05242		55.3146	0.04657		51.5026	0.05865		57.6266	0.0923		47.0492	0.04428		43.5234	0.03164		41.616	0.03146		57.6266	0.07262
48.4364	0.06021		54.1008	0.0458		48.9566	0.03188		42.3096	0.04088		60.6322	0.03424		76.6428	0.06627		62.3662	0.02028		75.429	0.05133		55.8348	0.04973		63.6956	0.05448		75.0822	0.04575		44.9957	0.04938		48.3786	0.05327		43.9858	0.04472		60.3432	0.05024		43.4078	0.06004		45.0262	0.03868
56.9908	0.09252		74.0996	0.0544		35.0268	0.02012		43.7546	0.02801		58.6092	0.03596		79.0126	0.0479		61.3258	0.04716		62.5974	0.03218		61.846	0.08291		65.025	0.07697		69.5912	0.06237		50.699	0.0523		53.6962	0.07741		52.6558	0.05493		40.8068	0.04387		52.0778	0.04131		50.8062	0.04724
54.621	0.11472		51.731	0.06097		36.8186	0.02908		54.91	0.06284		65.3718	0.03195		71.7298	0.05195		74.9666	0.03488		84.3302	0.02661		47.974	0.06639		65.3718	0.03941		64.2158	0.07962		56.0828	0.06742		42.5408	0.05026		36.7608	0.03932		46.5868	0.03833		43.7546	0.03888		50.575	0.04884
60.4588	0.05339		47.7428	0.04708		35.2002	0.02003		43.1188	0.046		69.1288	0.04404		76.4694	0.04023		64.2736	0.04516		73.8684	0.05151		54.4476	0.06755		64.5048	0.0625		56.8174	0.04872		50.3752	0.04599		42.483	0.06678		43.8124	0.03105		45.0262	0.05043		43.639	0.04176		53.0604	0.03558
48.4942	0.06575		53.9274	0.03878		40.2866	0.02764		38.2636	0.04015		69.2444	0.03788		65.9498	0.06216		70.4582	0.03444		72.4234	0.03728		58.5514	0.10314		62.0194	0.05944		71.1518	0.0565		49.0439	0.0416		49.419	0.05434		33.2928	0.03547		46.6446	0.03889		38.5526	0.02455		43.928	0.05451
48.4942	0.06575		57.7422	0.05307		55.0256	0.03528		44.7372	0.03527		52.6558	0.03866		78.319	0.09592		72.1344	0.0404		62.8864	0.04168		70.2848	0.07763		50.5172	0.0462		76.296	0.053		46.2603	0.03396		50.5172	0.06614		51.153	0.05871		50.864	0.05137		43.061	0.04696		32.1368	0.03806
46.5868	0.07693		54.5054	0.03554		34.7956	0.03399		44.2748	0.05203		60.2276	0.03532		63.7534	0.03397		72.25	0.02151		66.0654	0.04493		48.6676	0.05862		58.2046	0.05284		44.6794	0.04446		50.2922	0.05834		51.731	0.06667		47.2226	0.03279		48.2052	0.06626		49.5924	0.03337		43.0032	0.03487
46.5868	0.07693		53.1182	0.03909		45.084	0.0164		40.1132	0.02584		92.0754	0.06086		83.9256	0.06437		70.3426	0.05844		78.8392	0.03654		50.1704	0.04576		57.9156	0.04402		62.4818	0.03376		52.3368	0.05325		45.951	0.05451		48.6098	0.05186		35.6048	0.02499		49.8236	0.0499		45.662	0.0411
50.7484	0.07556		66.759	0.05135		38.3214	0.03347		50.286	0.04975		69.2444	0.03206		81.5558	0.06617		49.997	0.02791		78.8392	0.06739		61.9616	0.04788		54.5632	0.04618		51.153	0.042		54.3791	0.06043		53.3494	0.07432		49.419	0.04228		43.4078	0.04294		51.6732	0.06561		51.4998	0.04272
53.6962	0.07394		48.552	0.0447		44.9684	0.034		44.6794	0.03589		60.7478	0.04602		65.3718	0.05193		72.828	0.09783		68.782	0.04174		49.997	0.04701		53.6384	0.03939		57.3376	0.047		36.3571	0.0384		48.2052	0.065		43.5234	0.0371		41.327	0.03166		43.1766	0.0417		48.6098	0.05456
42.2518	0.06853		46.1822	0.04507		35.3158	0.02041		48.4942	0.02125		60.1698	0.04041		80.3998	0.06482		74.6776	0.08857		63.8112	0.05681		59.4184	0.08983		54.91	0.06436		54.4476	0.03538		48.4908	0.07023		51.3264	0.05846		43.8702	0.05957		35.6048	0.02499		35.7782	0.03952		49.3612	0.03724
69.938	0.08729		44.9106	0.03864		51.6732	0.02169		50.864	0.04423		66.8168	0.0473		88.6074	0.11953		95.6012	0.02707		77.3942	0.05052		66.6434	0.08766		56.1238	0.0821		64.5626	0.05581		48.0035	0.04936		45.4886	0.05401		43.2922	0.05244		43.4078	0.04294		45.8932	0.0425		41.2114	0.02871
42.0206	0.07602		68.782	0.04904		38.0902	0.02962		47.5694	0.04024		59.9964	0.03565		79.8796	0.08139		80.9778	0.06966		58.6092	0.02512		48.6676	0.05161		57.3376	0.05498		63.8112	0.04968		50.2709	0.03069		43.8702	0.04965		41.327	0.04591		41.327	0.03166		41.2692	0.05174		38.7838	0.04099
78.4924	0.08511		47.685	0.05606		45.3152	0.03886		31.9634	0.03684		68.5508	0.03994		81.7292	0.06193		67.2792	0.03921		65.9498	0.04284		62.8864	0.10429		58.2046	0.04837		65.0828	0.06504		44.0363	0.01989		61.4992	0.06781		32.5992	0.02786		52.0778	0.03683		44.2748	0.05293		46.9914	0.0573
47.2804	0.07743		59.823	0.06284		45.4308	0.02965		47.974	0.037		84.099	0.06056		85.0816	0.04469		80.2264	0.04356		65.9498	0.05815		60.1698	0.06194		52.02	0.03315		56.2972	0.10339		47.8243	0.05539		44.5638	0.04796		50.9796	0.05772		46.6446	0.05797		42.2518	0.03516		46.6446	0.04285
51.3842	0.06847		38.726	0.04183		45.662	0.05055		52.2512	0.03849		54.8522	0.04064		76.874	0.02912		54.043	0.01949		77.3364	0.04552		46.4712	0.03899		57.222	0.06325		57.3376	0.0584		40.0747	0.04247		42.3674	0.06554		51.153	0.05299		44.6794	0.05489		55.1412	0.05171		53.754	0.04088
42.772	0.03295		63.2332	0.055		38.2636	0.02041		49.997	0.0437		75.429	0.04897		70.805	0.05662		69.2444	0.03866		48.6676	0.06203		72.7124	0.0729		62.135	0.06146		71.1518	0.04829		42.3616	0.07069		45.1996	0.05378		55.6614	0.0392		49.8236	0.03667		41.905	0.03751		38.6682	0.03077
53.8118	0.0682		64.3314	0.04278		43.7546	0.02135		56.5284	0.04819		71.2674	0.04681		57.0486	0.05188		78.6658	0.05973		62.3662	0.03436		77.741	0.07493		67.4526	0.04905		76.1804	0.05177		51.7764	0.05611		59.1294	0.05849		45.7776	0.03625		48.841	0.04939		49.3612	0.05163		48.6676	0.04382
50.575	0.03737		86.6422	0.03772		43.7546	0.02752		59.534	0.08055		57.8	0.02044		60.2276	0.02818		66.6434	0.04797		57.511	0.02898		54.1586	0.05054		53.4072	0.05302		55.0256	0.0423		45.318	0.04609		44.9106	0.04767		48.6098	0.04402		45.1418	0.03566		43.5234	0.03069		40.46	0.03936
48.0896	0.07418		52.1356	0.05725		44.5638	0.01603		49.6502	0.04354		58.6092	0.04485		63.6378	0.02055		65.314	0.04005		50.1126	0.02464		69.7646	0.08336		68.9554	0.07195		45.4886	0.03954		51.1242	0.03604		49.4768	0.04468		39.5352	0.03532		51.0374	0.05217		45.662	0.05954		36.6452	0.03125
49.9392	0.07444		48.8988	0.03673		50.6906	0.02037		40.5756	0.04006		52.598	0.0261		71.7876	0.05199		75.14	0.03439		63.58	0.03259		55.0256	0.06835		58.3202	0.04173		52.0778	0.06358		46.7906	0.05322		45.084	0.05315		43.2922	0.0345		43.928	0.03496		45.1418	0.03089		35.6626	0.03595
42.1362	0.06011		72.5968	0.04278		57.6844	0.01172		48.3208	0.06222		58.1468	0.02983		73.5216	0.03137		49.0144	0.04238		64.736	0.05303		62.6552	0.08627		66.8746	0.05161		73.9262	0.03627		45.0566	0.05442		51.9044	0.06879		38.0324	0.03125		42.0784	0.03079		43.4656	0.03387		41.616	0.03185
58.0312	0.07411		48.3208	0.06199		44.2748	0.01776		42.3096	0.03568		50.5172	0.03347		68.5508	0.05785		71.7298	0.01991		60.8056	0.02577		61.6148	0.06396		66.2966	0.05485		64.1002	0.05341		44.6555	0.04975		36.7608	0.04801		34.8534	0.02857		46.9914	0.0383		54.1586	0.04829		41.8472	0.02164
43.6968	0.0497		54.8522	0.04072		43.4656	0.02376		45.084	0.04037		46.9914	0.03896		72.828	0.05047		57.4532	0.04645		55.2568	0.04085		57.2798	0.1127		56.7018	0.07457		60.5744	0.05522		49.1838	0.06572		50.0548	0.06		43.9858	0.03133		43.5234	0.03134		38.8416	0.03416		39.4774	0.04707
60.112	0.08149		57.1064	0.03442		43.639	0.02936		45.6042	0.03824		63.7534	0.04225		68.5508	0.02983		85.1972	0.05062		61.268	0.02757		60.1698	0.06935		55.488	0.05036		55.5458	0.056		48.0957	0.05404		41.1536	0.07973		46.4712	0.04167		46.0666	0.03123		43.1188	0.06684		41.7316	0.04593
55.4302	0.04115		40.3444	0.05206		45.8932	0.0147		46.7602	0.04186		71.5564	0.03379		80.4576	0.04753		67.915	0.05613		56.8174	0.01883		63.6378	0.07806		51.5576	0.05806		51.4998	0.09538		47.6906	0.04776		46.9914	0.07012		52.8292	0.04964		44.9684	0.03982		44.7372	0.05331		42.772	0.03994
44.506	0.05261		45.8354	0.04064		47.2226	0.02332		45.1418	0.04846		70.9206	0.06996		77.163	0.04755		69.5912	0.03842		78.03	0.03931		59.4762	0.09893		57.222	0.06385		78.2612	0.04115		54.4846	0.06504		50.9796	0.04702		42.8876	0.02982		47.974	0.04025		53.9852	0.06901		39.5352	0.02138
47.4538	0.07151		70.3426	0.06819		41.6738	0.01859		41.2114	0.02948		69.649	0.05851		84.0412	0.10585		71.1518	0.03796		60.6322	0.03346		59.3606	0.09211		55.0256	0.05014		63.1176	0.03687		53.1005	0.06844		52.7714	0.06497		46.5868	0.04562		51.8466	0.04189		47.0492	0.04916		50.1126	0.04092
56.9908	0.02926		47.4538	0.04237		47.107	0.04002		54.7944	0.05367		62.3662	0.04094		59.0716	0.0858		70.3426	0.03248		64.1002	0.04771		49.1878	0.05286		60.9212	0.05181		79.186	0.08083		45.6856	0.04906		50.2282	0.06362		40.2866	0.04124		43.8124	0.04173		40.8068	0.04467		40.749	0.04099
56.9908	0.02926		50.1704	0.05466		40.749	0.01128		57.5688	0.05316		75.0822	0.03754		58.956	0.05325		58.8982	0.02016		66.7012	0.04331		60.6322	0.05304		60.1698	0.03848		60.7478	0.03337		51.4825	0.04253		34.5644	0.03674		49.2456	0.04558		39.015	0.03213		44.3326	0.03932		49.13	0.03532
84.2146	0.06355		57.2798	0.0571		43.8124	0.02892		51.2108	0.05346		68.2618	0.0358		70.9784	0.04492		67.5104	0.02304		61.9038	0.0579		61.0368	0.06817		61.3258	0.04124		57.9734	0.0577		33.3718	0.04319		50.286	0.06316		45.7198	0.04385		40.2866	0.03553		47.9162	0.03668		56.4128	0.04853
56.066	0.10225		44.9106	0.04472		42.7142	0.01956		65.7186	0.04831		66.8746	0.04841		96.1214	0.09386		65.0828	0.02964		62.4818	0.04342		58.8982	0.10817		49.9392	0.04661		57.511	0.05882		45.5099	0.05659		48.841	0.05449		47.2226	0.03825		41.2692	0.02748		47.8584	0.05077		38.437	0.03813
50.4016	0.06888		53.6962	0.04289		55.3146	0.04177		46.8758	0.04176		60.4588	0.04754		75.2556	0.04222		69.1866	0.03135		75.9492	0.02582		65.603	0.0994		47.107	0.04831		68.0306	0.02722		48.3935	0.05857		52.8292	0.05615		40.8646	0.02832		44.1014	0.03316		49.8236	0.05495		31.0964	0.03344
52.309	0.07847		48.263	0.04637		44.9684	0.02582		47.6272	0.03295		63.6956	0.04604		69.1866	0.07668		70.5738	0.06815		60.5166	0.02931		57.1064	0.06996		53.1182	0.03178		64.6204	0.05409		48.0563	0.05184		43.5812	0.05086		45.3152	0.04088		43.35	0.02713		42.3096	0.03667		44.217	0.03391
41.2692	0.08747		46.4134	0.05453		51.5576	0.03221		49.8236	0.05254		78.3768	0.04353		69.938	0.05896		77.5676	0.05216		66.9324	0.02367		65.892	0.11059		54.4476	0.03162		54.7366	0.04007		48.1996	0.05396		48.7832	0.0582		39.304	0.02962		42.1362	0.02921		35.7782	0.02157		39.4774	0.04021
53.2338	0.06956		55.4302	0.04008		43.9858	0.05036		45.8354	0.05147		61.4414	0.0303		73.406	0.04438		60.112	0.01159		54.8522	0.01986		54.1586	0.06255		59.4762	0.07512		65.603	0.03999		50.7068	0.06523		52.4246	0.05855		43.8702	0.03353		49.6502	0.04876		43.5234	0.05057		38.5526	0.02528
43.8702	0.06173		46.0088	0.03199		44.795	0.02411		39.4774	0.03914		62.1928	0.05104		69.938	0.05733		70.3426	0.02356		56.9908	0.03279		64.1002	0.07411		53.6962	0.06073		68.782	0.04884		51.7928	0.05264		49.419	0.042		49.5924	0.03545		38.7838	0.03364		55.9504	0.05218		47.8006	0.04177
58.2046	0.06016		57.7422	0.05136		46.5868	0.02905		48.9566	0.05131		58.3202	0.04955		62.9442	0.0286		64.5626	0.04026		67.5682	0.0475		63.3488	0.0623		54.043	0.06539		80.9778	0.03346		53.3341	0.06135		47.7428	0.05002		39.4196	0.03693		54.5632	0.04095		50.4016	0.04987		48.3208	0.04034
64.5626	0.06365		59.1294	0.03535		46.7024	0.04033		48.9566	0.04862		49.0144	0.03578		75.0244	0.08226		66.9324	0.04263		77.1052	0.05015		59.823	0.07382		50.9218	0.04192		62.4818	0.09987		50.807	0.05832		56.7596	0.06061		45.1996	0.04769		49.997	0.03956		44.9106	0.05003		40.749	0.03696
59.8808	0.07521		50.6906	0.03033		54.5054	0.03855		58.089	0.06281		76.1804	0.0486		89.6478	0.09576		61.0946	0.03776		67.6838	0.03504		49.2456	0.05813		55.0256	0.04185		61.3258	0.07337		43.1838	0.05358		51.7888	0.05065		51.9622	0.05627		46.6446	0.04001		42.7142	0.03417		40.4022	0.02855
58.3202	0.09257		49.3034	0.04157		42.772	0.04582		39.4774	0.04006		58.8404	0.03393		76.6428	0.05882		64.6204	0.0871		55.199	0.02988		64.5626	0.08996		54.1586	0.07269		82.5962	0.03603		44.7847	0.04303		44.9684	0.05417		49.4768	0.03433		44.6216	0.04119		45.373	0.05718		41.8472	0.04792
43.639	0.05711		47.5694	0.04145		48.7254	0.01577		39.9398	0.04201		53.9852	0.04624		55.3724	0.0356		70.1692	0.05351		57.222	0.02094		62.135	0.07154		64.9094	0.05934		49.7658	0.05519		59.5391	0.04225		54.332	0.05044		45.2574	0.03691		40.171	0.03429		41.616	0.03929		50.3438	0.04298
74.0418	0.05171		52.309	0.04797		50.575	0.01824		59.534	0.04549		64.1002	0.03714		90.3992	0.05389		81.209	0.02838		76.6428	0.03698		64.9094	0.06517		55.0834	0.04123		75.1978	0.0491		40.7109	0.04729		49.9392	0.05322		45.1996	0.03369		39.8242	0.03254		51.3842	0.05117		41.038	0.02963
44.5638	0.07824		44.6216	0.03217		40.2288	0.01619		53.5228	0.04586		56.5284	0.05458		58.667	0.04778		56.9908	0.027		54.6788	0.03012		58.7248	0.06432		54.1008	0.03484		79.9952	0.06999		46.3025	0.05315		45.951	0.04341		44.6216	0.05097		45.951	0.04407		46.1244	0.0415		45.0262	0.03692
55.6614	0.06259		54.3898	0.0228		38.3792	0.0204		43.7546	0.04215		57.8578	0.04137		80.6888	0.01457		52.0778	0.02192		64.6204	0.04017		66.759	0.09359		51.4998	0.05059		54.91	0.04681		52.7782	0.07525		37.6278	0.04328		49.2456	0.04729		51.3264	0.04421		44.7372	0.03685		45.373	0.03498
56.8174	0.04792		42.4252	0.02952		53.9852	0.05754		63.1754	0.06007		61.9616	0.04009		83.232	0.03671		63.6956	0.03009		62.6552	0.03791		50.0548	0.06532		53.9274	0.04686		53.176	0.05007		48.3626	0.05193		51.3842	0.0614		42.3096	0.05319		38.8416	0.04497		45.4886	0.04355		42.772	0.03889
51.8466	0.06328		50.4016	0.03829		34.7378	0.0358		59.4762	0.07396		82.5962	0.04216		73.0592	0.06741		60.5166	0.04962		74.9088	0.03013		56.7596	0.05685		61.268	0.05416		54.5054	0.03981		31.5104	0.02029		61.268	0.07431		40.9224	0.03887		45.2574	0.0388		44.1014	0.04926		37.6856	0.03968
51.7888	0.06197		52.309	0.0444		33.9286	0.03463		47.5116	0.05049		83.232	0.05068		67.7416	0.05219		50.8062	0.0178		65.3718	0.04117		51.2686	0.04819		57.9156	0.04451		69.7646	0.06957		46.8669	0.05563		49.13	0.08044		44.2748	0.0417		49.5346	0.03882		45.373	0.07727		49.3612	0.04551
47.4538	0.06961		50.4594	0.04652		43.6968	0.02431		45.7776	0.05032		73.8106	0.04733		105.138	0.05102		65.4296	0.03573		70.8628	0.03824		71.9032	0.08198		56.7596	0.03865		53.6384	0.04473		44.8251	0.06288		54.621	0.06747		48.2052	0.04632		41.4426	0.04113		38.5526	0.03574		48.1474	0.03729
52.3668	0.08898		61.3258	0.061		38.3214	0.02788		60.5744	0.04966		83.0008	0.05326		105.774	0.04964		76.7584	0.04575		60.5744	0.03672		58.089	0.08426		54.5632	0.04743		56.7596	0.05858		46.3346	0.05256		48.9566	0.05006		48.4942	0.04654		45.2574	0.03742		48.263	0.04083		48.4942	0.03256
68.5508	0.06641		40.5178	0.02437		45.7198	0.05474		54.1586	0.0367		53.465	0.04347		68.6086	0.05708		54.7366	0.02434		64.0424	0.03237		56.933	0.06851		55.6036	0.04873		66.0076	0.05155		47.192	0.05552		46.529	0.08423		43.8124	0.03591		49.4768	0.06496		45.4886	0.0486		43.7546	0.04858
52.4246	0.07411		60.5744	0.0779		37.0498	0.04225		35.7204	0.04052		78.8392	0.08031		87.3936	0.06078		60.2276	0.03529		66.5278	0.0277		69.8802	0.07596		67.8572	0.0503		74.5042	0.04045		50.636	0.04595		50.575	0.05764		39.2462	0.02883		37.9168	0.04183		51.0374	0.04545		45.0262	0.0507
56.8752	0.06118		42.5408	0.04735		48.7832	0.0371		47.6272	0.04469		54.5054	0.04104		76.9896	0.03714		71.2674	0.06049		66.9902	0.07729		63.9846	0.06254		63.9846	0.04766		56.066	0.02313		35.1773	0.05999		54.2742	0.06128		45.6042	0.04411		38.9572	0.05736		43.1188	0.04336		47.5116	0.02949
41.327	0.04556		47.974	0.05315		36.4718	0.02557		43.4656	0.03557		82.5384	0.03919		70.3426	0.08637		79.3594	0.05211		85.3128	0.04449		60.979	0.08038		55.9504	0.03191		55.3724	0.05931		47.8372	0.07193		45.3152	0.0501		41.7316	0.03141		41.2692	0.0313		46.24	0.04903		42.772	0.03097
43.5234	0.04878		59.0716	0.0896		33.9864	0.02781		54.1008	0.06783		61.4992	0.0336		72.6546	0.04023		57.7422	0.01421		79.5906	0.04693		58.7826	0.06575		61.9038	0.079		92.4222	0.0548		43.6036	0.04425		54.4476	0.04085		44.1014	0.04138		53.5228	0.0405		45.7198	0.03977		35.6048	0.03434
44.1014	0.05617		47.8006	0.03175		42.7142	0.03606		48.263	0.06997		75.718	0.0567		76.1804	0.06677		50.9218	0.03639		70.5738	0.0334		71.7876	0.07529		56.1816	0.06249		71.4408	0.07618		46.7019	0.05923		46.4712	0.05034		36.125	0.02328		42.8298	0.04311		41.616	0.04672		38.8994	0.01974
50.8062	0.06972		43.5234	0.04141		48.4942	0.02743		48.3786	0.03743		67.5104	0.05322		72.3656	0.04096		68.1462	0.03461		62.0772	0.04617		70.4582	0.06367		50.4594	0.04704		63.1754	0.04009		43.3718	0.04766		51.731	0.05302		42.3096	0.03788		47.974	0.04338		45.5464	0.04611		42.6564	0.04214
44.5638	0.07017		62.6552	0.07285		40.8646	0.03974		46.2978	0.03084		48.6676	0.02217		72.8858	0.06155		70.805	0.04938		56.933	0.0533		51.8466	0.07395		63.5222	0.05506		70.7472	0.03689		42.7271	0.05724		48.263	0.05032		44.3326	0.05459		44.7372	0.04939		35.4892	0.02527		39.9398	0.01991
45.5464	0.08572		55.6036	0.04371		46.4712	0.03308		40.8646	0.0432		61.846	0.03409		76.585	0.04415		58.2624	0.0234		82.654	0.05071		60.7478	0.06142		62.9442	0.05902		49.708	0.03718		46.0678	0.058		46.24	0.04682		40.171	0.0406		42.0784	0.03339		42.5408	0.05717		52.4824	0.04135
44.9106	0.05954		41.5004	0.0372		39.5352	0.03159		43.8124	0.04484		65.7186	0.0388		89.2432	0.05305		67.337	0.02138		67.5104	0.03815		58.956	0.08365		49.419	0.05189		63.9846	0.02369		46.9404	0.05337		58.2046	0.06028		40.1132	0.04469		45.1996	0.03963		56.2394	0.05896		42.2518	0.02761
42.3096	0.06497		44.6794	0.03901		61.2102	0.02301		52.8292	0.04584		74.273	0.03928		89.5322	0.03326		67.2792	0.02393		70.9784	0.03491		64.8516	0.06726		53.465	0.06829		61.2102	0.04697		44.1788	0.04823		44.795	0.04168		44.9106	0.03845		42.7142	0.02814		41.2692	0.04783		42.2518	0.02761
49.0722	0.06174		57.2798	0.06798		41.9628	0.03262		58.5514	0.06186		65.603	0.04924		53.6384	0.03203		66.8746	0.01957		62.9442	0.0215		54.9678	0.07263		58.2046	0.03025		54.043	0.06601		54.9726	0.06107		50.286	0.05501		38.6682	0.03697		37.1076	0.03295		46.9914	0.0689		49.419	0.04946
41.327	0.07808		75.8336	0.03951		52.309	0.0323		40.749	0.0432		63.3488	0.05082		63.58	0.02314		88.3184	0.03284		73.2904	0.03974		69.8802	0.08498		57.4532	0.0459		59.9386	0.05567		50.1942	0.05803		57.9734	0.07974		50.7484	0.06553		40.6334	0.03053		46.1822	0.02978		43.6968	0.03913
54.7366	0.06373		43.35	0.03796		42.483	0.01812		54.043	0.05596		71.4986	0.03004		73.8106	0.05569		71.4986	0.01839		61.268	0.04636		54.621	0.05985		55.3724	0.04234		50.0548	0.07169		40.1537	0.03697		38.148	0.05328		40.9802	0.05007		49.0144	0.03851		37.7434	0.05878		42.5986	0.02917
48.841	0.05636		47.1648	0.04235		49.3612	0.02072		45.5464	0.04772		78.9548	0.04797		68.2618	0.03428		69.1288	0.02587		58.0312	0.02881		52.02	0.08203		61.4992	0.04727		75.5446	0.03667		51.0485	0.06499		48.7254	0.06296		42.9454	0.05241		51.2108	0.05888		48.263	0.04682		46.9336	0.03968
53.8696	0.08373		79.764	0.04046		45.8932	0.03066		52.02	0.04544		66.5856	0.04166		69.8224	0.06229		78.4346	0.03594		62.0772	0.03379		62.6552	0.06468		56.1238	0.02403		72.0188	0.04596		46.0724	0.0513		53.9852	0.07765		47.4538	0.03543		47.7428	0.04627		42.7142	0.05258		50.6328	0.05996
47.8006	0.07826		39.9398	0.05306		48.2052	0.0288		41.5582	0.04771		52.02	0.0288		95.5434	0.10699		60.2276	0.03671		60.1698	0.03766		56.644	0.06187		62.3084	0.04548		64.6782	0.03024		65.3643	0.05741		49.3612	0.05936		37.8012	0.04665		46.0666	0.0426		40.9802	0.04872		43.2344	0.03318
50.575	0.06681		47.8584	0.0554		40.1132	0.01105		53.2916	0.0491		64.2158	0.03189		61.4414	0.0288		68.9554	0.04047		64.6204	0.0335		54.6788	0.06406		54.2164	0.05192		63.6956	0.05305		55.4561	0.0666		43.061	0.03381		39.5352	0.04143		47.3382	0.04809		44.4482	0.07007		53.8696	0.04162
55.9504	0.05381		55.1412	0.05204		44.2748	0.03233		41.2692	0.0389		62.0772	0.04303		75.4868	0.04966		61.0368	0.0258		63.5222	0.0446		53.754	0.05457		56.1238	0.02391		78.4346	0.04275		66.5813	0.05061		43.2344	0.04216		47.8584	0.03852		44.2748	0.03841		49.8236	0.04945		45.7198	0.02943
47.8006	0.07465		48.3786	0.04901		48.841	0.02654		47.2226	0.05742		52.1934	0.03896		66.2966	0.02358		61.9616	0.03338		62.8864	0.03486		55.6614	0.06647		59.534	0.03553		52.6558	0.06305		46.7063	0.0639		52.0778	0.06419		51.153	0.05669		52.7136	0.03369		51.0374	0.03863		41.7894	0.02429
44.0436	0.04243		62.9442	0.04641		47.3382	0.05512		43.9858	0.06539		66.6434	0.03074		60.112	0.06146		75.0244	0.02515		58.6092	0.04267		51.2108	0.04265		52.887	0.07566		62.2506	0.05738		47.9539	0.06111		48.263	0.03966		50.7484	0.04337		53.465	0.04313		40.6912	0.04363		46.529	0.04113
48.3208	0.06893		42.6564	0.03226		41.7316	0.01175		42.772	0.04359		79.8796	0.03627		67.9728	0.04188		63.7534	0.04846		69.071	0.03869		56.933	0.07472		46.4134	0.04538		53.9852	0.03713		49.8609	0.06036		48.841	0.05838		40.9224	0.04105		44.217	0.03835		38.726	0.03565		47.1648	0.04121
48.6098	0.05576		45.6042	0.05011		53.2338	0.02912		39.6508	0.05368		85.1972	0.03598		79.9374	0.055		59.4184	0.03587		69.2444	0.03455		52.7136	0.04182		100.399	0.04502		69.1866	0.0359		47.2072	0.0563		47.7428	0.05653		41.0958	0.04391		42.3674	0.03098		50.9796	0.05104		41.327	0.02514
75.1978	0.07199		54.5632	0.04209		45.1418	0.0133		46.0088	0.04873		64.3314	0.03216		52.1934	0.04974		55.199	0.01417		52.4824	0.03273		52.3668	0.07699		49.1878	0.05026		65.314	0.04478		43.6995	0.04445		46.9914	0.0694		59.823	0.06367		48.263	0.03411		44.7372	0.03516		44.3904	0.03459
42.5408	0.05569		73.5794	0.05412		43.2344	0.02919		46.5868	0.04106		80.342	0.03796		71.5564	0.04492		65.7764	0.03371		76.4694	0.04108		59.3606	0.06039		62.2506	0.04238		87.1624	0.04089		46.5616	0.08843		50.864	0.07502		43.8124	0.04234		49.1878	0.04249		41.6738	0.04862		47.9162	0.04097
63.6956	0.05142		46.24	0.05402		44.9684	0.01691		43.7546	0.04985		54.2742	0.03594		62.8864	0.03052		69.9958	0.05005		66.3544	0.03382		66.5856	0.06739		55.1412	0.04743		85.4862	0.04658		42.7426	0.04824		48.552	0.05069		38.8416	0.05152		54.8522	0.04018		39.8242	0.05461		52.1356	0.03551
52.309	0.08254		49.3034	0.0308		47.1648	0.04181		64.447	0.04544		60.9212	0.04852		74.5042	0.06553		64.5048	0.04688		59.0716	0.03789		60.2854	0.06715		60.6322	0.06757		53.8696	0.06175		42.8481	0.0584		45.2574	0.05124		46.9336	0.04556		41.5004	0.03787		45.084	0.05737		45.7198	0.06215
51.731	0.07832		52.8292	0.05745		43.5812	0.0243		43.4078	0.05545		63.291	0.03023		70.9206	0.08473		63.0598	0.04516		60.4588	0.03766		57.8	0.06837		56.2394	0.06204		45.0262	0.02489		51.0708	0.05783		55.8348	0.0409		43.6968	0.05041		38.3214	0.03034		46.4134	0.04109		46.2978	0.04047
69.2444	0.05668		46.0088	0.03388		45.1418	0.07298		49.6502	0.03275		48.3208	0.03467		72.7124	0.03143		63.1754	0.01588		70.5738	0.03305		50.864	0.05932		60.5166	0.04329		94.0406	0.04096		42.893	0.05064		42.4252	0.06391		43.9858	0.03875		47.3382	0.03248		39.4196	0.04748		42.7142	0.04256
44.1592	0.03717		55.777	0.04941		52.309	0.03662		49.2456	0.04442		66.0076	0.0293		59.0716	0.01103		62.3084	0.06096		86.989	0.05091		59.4762	0.06149		55.4302	0.05321		51.3264	0.04139		56.1629	0.058		55.2568	0.06184		46.3556	0.0441		50.6328	0.06668		40.2866	0.04098		50.9796	0.05085
54.043	0.07646		44.6216	0.04126		50.6328	0.03566		37.3966	0.04375		74.273	0.04801		64.3314	0.03578		55.9504	0.01726		57.8	0.03396		47.9162	0.06446		53.6384	0.03853		43.639	0.05126		48.2255	0.05853		45.084	0.05227		47.5694	0.05175		48.8988	0.0411		51.731	0.0412		40.2288	0.04057
59.1872	0.08902		67.9728	0.05295		40.5756	0.01565		36.992	0.03407		60.112	0.02176		71.7298	0.09842		54.7944	0.01736		77.0474	0.0325		49.708	0.05414		62.1928	0.05687		49.5924	0.05739		49.6097	0.06089		52.8292	0.0731		43.2922	0.03696		44.4482	0.04096		38.0324	0.03181		42.8876	0.0338
85.7752	0.06297		65.8342	0.04727		33.9286	0.02943		47.2226	0.04972		96.1214	0.04108		66.5856	0.07312		54.9678	0.02905		96.6416	0.03769		60.8634	0.05911		50.6906	0.04839		62.0194	0.11017		45.3891	0.04862		54.9678	0.06438		46.9914	0.04002		44.5638	0.05919		48.2052	0.03551		39.015	0.04507
53.2338	0.06636		52.4824	0.07761		44.6216	0.01611		42.8298	0.04068		63.6956	0.04891		63.1754	0.03868		47.8584	0.03267		62.135	0.02785		51.4998	0.06379		57.6844	0.05619		45.084	0.03348		45.8627	0.07389		51.442	0.05896		47.974	0.0374		50.4594	0.042		46.1822	0.05092		49.9392	0.05693
60.112	0.07697		44.0436	0.07377		46.5868	0.03518		48.1474	0.05452		64.158	0.04271		68.3196	0.03568		63.6956	0.02251		68.5508	0.04501		51.2108	0.04917		77.3364	0.04885		53.0026	0.04448		46.2236	0.04013		47.5694	0.06005		48.263	0.03744		37.9746	0.03917		48.6098	0.06025		52.7136	0.04567
66.759	0.07182		52.3668	0.03946		40.1132	0.03494		51.0374	0.04887		91.2084	0.09325		62.0194	0.04035		69.5334	0.04662		73.2326	0.05381		52.1934	0.06174		53.6962	0.0355		65.892	0.06368		45.7167	0.06159		46.9914	0.05093		41.905	0.02982		45.951	0.02462		46.5868	0.02784		47.396	0.04358
62.9442	0.0757		58.5514	0.05667		44.0436	0.03088		51.6732	0.04212		61.4992	0.04772		79.1282	0.07543		69.071	0.02828		69.5334	0.04819		69.5912	0.07671		58.6092	0.04171		45.4886	0.04516		44.0336	0.05557		56.7596	0.07028		39.4774	0.0332		43.5812	0.04244		48.7832	0.04463		51.0952	0.04336
41.905	0.05651		46.818	0.05842		41.327	0.04684		38.8994	0.03123		46.4134	0.03881		54.1586	0.04334		71.0362	0.03186		84.1568	0.0417		51.7888	0.04537		51.4998	0.04286		55.3724	0.02469		50.2945	0.0543		52.0778	0.0678		46.0666	0.034		41.9628	0.04349		42.3674	0.041		50.0548	0.0578
85.833	0.05702		39.9398	0.04116		41.3848	0.01337		51.6732	0.04706		59.245	0.07935		65.025	0.05835		86.0642	0.03994		78.7236	0.04647		55.0834	0.04724		79.764	0.05446		60.2276	0.05873		39.8368	0.03694		48.9566	0.04863		46.2978	0.03997		58.7826	0.03753		41.038	0.04915		36.1828	0.02287
50.8062	0.06546		53.6384	0.02428		40.46	0.02115		57.2798	0.0421		63.9268	0.04299		86.0064	0.08435		74.7932	0.04756		56.5284	0.02714		63.0598	0.04122		58.956	0.06571		62.8864	0.04096		33.3018	0.02976		53.754	0.04976		45.2574	0.04498		42.9454	0.04472		41.4426	0.07024		44.2748	0.03837
59.1872	0.1007		41.6738	0.0393		41.2692	0.02258		43.2344	0.0317		94.6186	0.06698		71.0362	0.04095		82.1338	0.02321		65.7186	0.04393		55.9504	0.04694		57.2798	0.04562		64.5626	0.03519		51.2362	0.06119		50.1126	0.05068		50.0548	0.04953		37.9746	0.04384		47.7428	0.0359		44.1014	0.03499
57.6266	0.08251		69.071	0.05711		39.593	0.04511		44.8528	0.04502		66.47	0.03299		80.631	0.04138		67.3948	0.0259		59.245	0.04254		56.8752	0.06824		56.355	0.04835		70.805	0.04303		50.9904	0.04821		42.5986	0.0348		50.9218	0.04483		43.2922	0.03225		40.9224	0.04701		38.9572	0.02177
42.0206	0.06027		46.4712	0.03953		46.1822	0.01312		54.91	0.05243		72.9436	0.02525		64.9672	0.05084		77.163	0.05149		64.736	0.04588		60.1698	0.07681		67.3948	0.06373		83.6944	0.05319		51.2946	0.06298		51.2686	0.04137		52.7136	0.05029		45.4886	0.03515		45.0262	0.03812		38.437	0.03315
59.245	0.07378		48.3208	0.0653		46.5868	0.05821		39.4196	0.03876		86.6422	0.05313		75.9492	0.05238		66.0654	0.04783		58.4936	0.05208		51.153	0.06751		66.47	0.03797		54.7366	0.05109		52.8784	0.06043		42.3674	0.06107		52.1356	0.0446		38.0324	0.02812		44.5638	0.03852		40.4022	0.0348
58.7248	0.07892		47.3382	0.053		45.2574	0.02369		42.483	0.04624		89.7634	0.0743		69.7068	0.03341		69.938	0.0418		64.736	0.02978		70.8628	0.07549		55.8926	0.05997		50.1704	0.03257		49.5838	0.05103		52.3668	0.07579		38.2636	0.02424		51.4998	0.06961		46.5868	0.0285		49.997	0.03594
69.1288	0.09156		56.5284	0.04818		37.859	0.01824		53.2338	0.05478		51.7888	0.02749		75.6602	0.04507		82.7696	0.05271		50.864	0.02608		60.1698	0.08357		56.0082	0.02882		77.9722	0.04753		36.9557	0.03842		55.9504	0.06116		44.7372	0.03235		36.0672	0.02672		53.6962	0.04249		55.1412	0.06846
62.424	0.08466		46.0088	0.05381		59.3606	0.03899		53.8696	0.04353		69.1866	0.03797		84.677	0.05065		67.1058	0.04839		68.5508	0.04425		47.3382	0.05878		69.9958	0.04653		49.7658	0.05054		49.5584	0.05511		47.685	0.0522		48.6676	0.04729		49.997	0.03623		45.7776	0.03509		43.6968	0.0388
45.662	0.0683		64.6204	0.04623		38.3792	0.03272		46.1244	0.05274		59.7074	0.05539		84.966	0.0621		58.0312	0.02288		62.4818	0.04647		52.7136	0.07567		60.7478	0.09825		61.268	0.03943		48.4136	0.05685		47.107	0.05269		53.3494	0.04912		33.235	0.01984		41.0958	0.04282		47.6272	0.04785
49.8236	0.07657		53.8696	0.05253		45.2574	0.04966		41.8472	0.04434		83.2898	0.05235		71.9032	0.05231		77.2786	0.05768		64.0424	0.03438		66.9324	0.0472		54.1586	0.04711		71.0362	0.05629		40.8348	0.01917		42.4252	0.05089		34.102	0.02999		53.3494	0.04787		38.3214	0.03599		39.6508	0.04489
43.2922	0.09066		64.6782	0.04772		49.13	0.02128		44.7372	0.05312		64.736	0.03271		80.3998	0.06052		75.3712	0.02357		81.6136	0.02011		62.713	0.06699		51.442	0.05091		53.465	0.04972		46.0021	0.06181		48.0318	0.05236		40.5756	0.03697		46.1244	0.04163		43.35	0.04733		49.13	0.03677
73.9262	0.0652		56.8174	0.04719		57.3954	0.03961		49.13	0.05745		61.557	0.05705		84.5614	0.06023		71.2096	0.02785		56.933	0.03289		48.8988	0.03368		67.626	0.06276		73.8106	0.03629		44.6897	0.05587		47.6272	0.04665		43.2344	0.03752		39.3618	0.05099		44.3326	0.02217		45.951	0.03107
47.1648	0.05461		51.731	0.0574		54.7944	0.0274		51.0374	0.04668		86.0642	0.07294		74.6776	0.05421		69.7646	0.03848		58.2046	0.03025		47.0492	0.0571		65.7186	0.03536		46.1822	0.04069		45.7296	0.04044		55.0834	0.05584		43.2344	0.04095		48.7254	0.04203		40.8646	0.02362		41.2692	0.05504
49.3612	0.07073		56.1816	0.03136		44.9684	0.02663		43.2922	0.05192		54.9678	0.04043		67.337	0.08053		72.0766	0.04668		65.3718	0.05466		54.3898	0.07566		58.2624	0.03414		67.1636	0.04654		41.3927	0.06549		49.8814	0.05033		37.859	0.04292		42.1362	0.03743		50.6328	0.0487		39.593	0.02078
51.8466	0.05915		52.887	0.03888		41.3848	0.03101		55.4302	0.03732		51.3842	0.03648		66.181	0.09643		58.6092	0.04176		57.1064	0.02546		52.4824	0.05797		57.9734	0.02756		70.3426	0.03849		49.1007	0.05273		49.419	0.03603		42.3674	0.04685		42.6564	0.0412		48.4364	0.06377		40.6912	0.04854
63.002	0.06068		43.5812	0.03052		44.8528	0.02474		41.8472	0.0351		75.7758	0.08218		64.158	0.03704		66.9902	0.05107		66.8746	0.03482		51.442	0.03848		64.6782	0.06748		50.2282	0.0529		47.9191	0.0513		48.2052	0.05293		46.8758	0.04065		55.7192	0.03694		41.1536	0.03629		49.8814	0.04528
47.396	0.04158		39.1884	0.03146		48.9566	0.01812		40.6334	0.04496		98.9536	0.04689		89.7634	0.05514		77.9144	0.03905		64.5626	0.02281		50.1704	0.06234		58.0312	0.04682		59.534	0.05866		48.2089	0.0486		47.5694	0.05307		39.9398	0.05054		48.1474	0.03997		43.35	0.02999		45.5464	0.044
51.4998	0.04307		46.3556	0.05577		33.9864	0.04327		51.7888	0.0488		67.8572	0.03901		85.7174	0.05235		53.2338	0.03851		71.094	0.05205		58.0312	0.06919		64.5048	0.08573		65.6608	0.07031		46.6437	0.04971		47.5694	0.05307		39.2462	0.04883		48.3786	0.04378		57.9156	0.05003		53.3494	0.03164
59.9964	0.06694		43.061	0.06024		41.1536	0.01791		47.685	0.04596		70.5738	0.0543		68.4352	0.09373		60.112	0.01337		59.5918	0.03094		59.0138	0.09028		49.3034	0.02552		63.291	0.03899		44.1983	0.06419		46.4712	0.0577		44.0436	0.04189		39.1884	0.03585		41.038	0.0538		40.4022	0.0417
51.3842	0.04081		59.5918	0.03386		42.5986	0.02048		46.2978	0.02935		64.6782	0.0666		85.8908	0.06218		68.782	0.02749		64.2736	0.03051		62.424	0.07346		54.1008	0.03488		51.2686	0.02746		44.2205	0.05605		45.2574	0.06468		44.9684	0.04912		45.951	0.03561		40.8068	0.02696		46.8758	0.04997
48.841	0.08024		39.9398	0.02271		35.3736	0.03496		45.8354	0.05187		45.662	0.05341		70.7472	0.04365		51.3264	0.03792		67.915	0.02596		54.3898	0.08427		55.1412	0.0402		55.3146	0.0259		50.9701	0.07636		45.084	0.04382		46.1244	0.04724		45.3152	0.0375		43.9858	0.03411		43.5812	0.03987
62.7708	0.08568		45.7776	0.03741		46.7024	0.02479		37.9746	0.04231		67.2214	0.04296		76.1804	0.07344		83.8678	0.04708		67.2214	0.03819		57.8	0.08952		76.9896	0.04301		56.7596	0.04323		41.8262	0.04035		48.9566	0.05157		41.7894	0.03207		45.951	0.03561		55.2568	0.04216		42.3674	0.04719
44.9106	0.05875		55.6614	0.03189		46.7602	0.02847		50.6906	0.03341		47.974	0.0463		57.5688	0.04138		72.3078	0.05306		71.9032	0.04621		58.0312	0.08427		56.644	0.04329		87.6826	0.08626		58.0942	0.05971		48.4942	0.06762		49.8814	0.05148		45.3152	0.0375		40.8068	0.02796		44.7372	0.03613
62.713	0.07213		66.3544	0.03796		36.125	0.02532		56.2394	0.04945		74.3886	0.02864		58.3202	0.02883		70.1114	0.01981		70.9206	0.04317		59.0716	0.05956		78.8392	0.08373		60.112	0.04518		44.9551	0.04887		54.8522	0.09535		44.4482	0.05033		48.0318	0.04082		41.0958	0.04229		43.5234	0.03512
58.2046	0.05584		40.6912	0.02628		39.593	0.04492		58.1468	0.0598		85.4862	0.04617		63.9846	0.04771		68.8976	0.05892		57.6844	0.02662		62.6552	0.05933		57.8578	0.03607		77.6832	0.03836		56.3312	0.0648		45.084	0.04773		47.0492	0.03221		43.4078	0.04414		47.9162	0.04613		49.4768	0.03342
46.0666	0.07302		54.7366	0.05766		49.419	0.02527		60.69	0.06486		62.3084	0.03443		69.5334	0.05589		59.9386	0.03015		60.69	0.03373		55.0256	0.06636		54.91	0.05274		60.69	0.03587		45.3419	0.06136		52.6558	0.07852		44.3904	0.04993		47.974	0.05371		41.327	0.03993		46.0666	0.06087
50.8062	0.07836		52.7714	0.04116		44.0436	0.0311		37.8012	0.03442		54.4476	0.02486		82.2494	0.0376		71.383	0.04252		63.0598	0.04425		61.6726	0.08649		82.2494	0.05363		59.534	0.03159		50.4764	0.05208		58.089	0.06538		46.9914	0.03229		45.3152	0.04811		40.6912	0.07748		44.8528	0.03465
52.887	0.07408		61.557	0.04862		62.9442	0.00985		50.1704	0.03913		65.7764	0.04572		86.4688	0.05027		77.3364	0.04721		69.2444	0.0632		63.58	0.06923		71.3252	0.05531		55.4302	0.05486		59.302	0.06855		58.089	0.06538		43.928	0.04858		45.5464	0.05596		48.7254	0.04444		51.8466	0.04492
57.6844	0.07343		52.2512	0.04899		50.575	0.02877		56.7596	0.05309		52.4246	0.0328		78.2034	0.09822		57.1642	0.03213		65.892	0.05077		54.043	0.06892		58.7826	0.08937		54.4476	0.06082		42.7826	0.04943		42.7142	0.04724		47.2804	0.04402		43.6968	0.03662		44.795	0.05074		50.0548	0.07473
50.4016	0.04874		38.9572	0.03028		53.1182	0.05024		40.1132	0.0373		77.6832	0.03972		59.3606	0.03521		59.5918	0.04431		62.0772	0.03664		54.1008	0.0667		50.6906	0.05546		66.181	0.03819		43.4281	0.05119		41.616	0.0441		42.194	0.0429		34.6222	0.04274		38.3214	0.03267		41.8472	0.04383
49.9392	0.06534		59.0716	0.05125		37.4544	0.03857		44.3326	0.04884		48.3208	0.03685		76.9318	0.0682		65.4296	0.03842		63.0598	0.04334		51.4998	0.07161		60.8056	0.06337		48.8988	0.03058		34.5478	0.00407		44.4482	0.06011		38.8416	0.03442		40.8068	0.03863		39.593	0.04641		45.5464	0.037
72.1922	0.07509		60.5166	0.03112		43.9858	0.03284		42.7142	0.04089		67.2214	0.04837		69.1866	0.04073		67.2214	0.02605		70.1114	0.04113		74.0996	0.12448		55.2568	0.04984		55.777	0.0541		43.5125	0.06319		52.887	0.08555		41.327	0.04152		42.8298	0.02682		49.5924	0.06127		41.0958	0.05887
56.9908	0.08186		41.0958	0.02864		39.882	0.04659		43.4656	0.0344		86.1798	0.03866		65.892	0.03639		67.048	0.03748		67.5104	0.03614		53.1182	0.06863		53.754	0.05477		60.401	0.04561		50.9596	0.04551		42.3096	0.06009		32.5414	0.02472		45.0262	0.04349		45.8932	0.05354		51.2108	0.05536
56.9908	0.08186		78.4924	0.04915		40.3444	0.01925		44.9684	0.02819		78.2034	0.05014		92.9424	0.06331		75.0244	0.05068		82.365	0.05824		56.355	0.08833		56.5862	0.05768		49.8814	0.06127		49.1898	0.07997		46.24	0.05095		44.795	0.04464		48.2052	0.0445		42.8876	0.04128		45.0262	0.04805
77.2786	0.05999		55.7192	0.05852		46.1244	0.02387		37.859	0.04167		62.3662	0.04221		63.1176	0.03169		65.314	0.03356		76.4116	0.04574		49.6502	0.06848		69.1288	0.05538		66.5278	0.0588		40.6499	0.04555		52.1934	0.06463		42.4252	0.03565		50.7484	0.04125		46.2978	0.0451		48.4364	0.05398
79.186	0.07478		54.8522	0.05942		42.8298	0.05803		40.8646	0.05203		48.1474	0.04362		65.0828	0.03903		73.5216	0.06557		54.3898	0.03443		55.2568	0.06998		61.4992	0.0493		63.5222	0.05333		51.8003	0.06426		42.9454	0.0443		42.4252	0.03065		39.0728	0.03138		49.5924	0.03823		46.7602	0.033
66.5278	0.10325		50.6906	0.01715		47.685	0.01411		42.194	0.04203		55.3146	0.03363		67.048	0.05484		79.3594	0.05036		63.1754	0.04897		54.1008	0.05445		57.222	0.0579		45.8932	0.04856		55.6722	0.05027		50.1126	0.0517		43.639	0.03604		55.9504	0.05388		46.0666	0.04692		47.8006	0.04682
44.0436	0.06238		53.2338	0.04754		50.4594	0.03382		41.038	0.055		87.6826	0.04432		73.3482	0.03659		69.4756	0.04869		65.1406	0.03214		47.8006	0.05613		60.9212	0.0482		59.8808	0.06144		46.5134	0.04916		46.0666	0.04153		44.217	0.03278		39.882	0.03707		37.5122	0.04676		46.0088	0.03561
52.2512	0.08495		43.2344	0.02025		47.3382	0.04639		43.9858	0.04448		67.5682	0.05122		90.2258	0.06653		70.4004	0.04632		63.0598	0.0328		49.8236	0.07225		53.1182	0.06451		62.5396	0.03777		48.2818	0.06548		54.043	0.06771		45.0262	0.03789		48.6676	0.02742		44.4482	0.04881		56.066	0.04317
56.8174	0.07996		62.9442	0.04102		39.593	0.02492		43.5812	0.0386		55.0256	0.03112		91.8442	0.07817		67.7416	0.03363		66.9324	0.03172		68.493	0.05494		59.8808	0.04628		52.5402	0.03391		48.5932	0.05257		48.9566	0.053		49.6502	0.05145		44.6794	0.05898		38.2058	0.04259		43.5812	0.03252
44.9106	0.06367		40.46	0.05438		44.1592	0.02231		76.8162	0.04925		65.0828	0.03176		71.672	0.03608		66.4122	0.04902		81.6136	0.04327		49.8814	0.05554		58.0312	0.03388		78.3768	0.08122		41.1817	0.03813		52.2512	0.04216		43.5234	0.03688		43.0032	0.04739		42.483	0.02965		43.35	0.04176
51.8466	0.06632		44.8528	0.03571		51.153	0.02613		45.6042	0.04089		67.8572	0.03649		74.6776	0.05312		64.6782	0.05594		73.117	0.02945		65.2562	0.06879		65.2562	0.04317		57.1642	0.03914		44.7341	0.07275		47.1648	0.04524		47.8006	0.0436		41.4426	0.03899		41.3848	0.03226		41.0958	0.02588
48.4364	0.06372		59.245	0.05881		58.956	0.03862		47.8584	0.0428		59.1872	0.04655		64.5626	0.03184		56.355	0.02254		54.2742	0.02136		49.5924	0.05801		57.9734	0.05549		65.025	0.04026		45.69	0.06051		51.7888	0.06938		43.5812	0.04372		39.6508	0.04179		38.7838	0.05025		41.2692	0.0429
49.13	0.05021		50.9218	0.07133		40.1132	0.0282		46.529	0.05738		56.5862	0.03005		58.5514	0.05449		65.603	0.02384		63.9846	0.034		64.158	0.08563		59.4762	0.03989		71.6142	0.02867		55.2919	0.05662		53.8118	0.0509		45.662	0.03727		41.3848	0.03951		46.7602	0.06388		45.373	0.0534
47.7428	0.09994		49.3034	0.05391		41.2692	0.01661		44.8528	0.05996		76.3538	0.06178		66.47	0.05378		68.3774	0.04798		77.452	0.05409		53.9274	0.05267		50.2282	0.03624		62.1928	0.04489		48.499	0.05596		49.419	0.05535		48.2052	0.04597		43.1766	0.04003		37.7434	0.03064		45.951	0.04055
46.7602	0.07175		46.529	0.06191		37.3966	0.0186		37.9746	0.0381		56.8174	0.03605		61.557	0.03631		59.0716	0.06088		58.0312	0.02924		59.245	0.06467		57.6266	0.04729		57.2798	0.04072		47.4007	0.06138		42.8876	0.03857		50.7484	0.05042		49.2456	0.03851		41.2692	0.04007		47.5694	0.04118
45.5464	0.05822		53.5228	0.03334		30.6918	0.05919		45.3152	0.04171		71.672	0.04333		70.4582	0.12777		71.2096	0.04946		60.6322	0.04107		61.6148	0.07948		54.91	0.03699		66.5278	0.03556		47.2	0.07913		41.1536	0.06035		39.8242	0.03404		40.171	0.03452		42.4252	0.03018		47.5694	0.04118
52.598	0.05418		59.7074	0.04649		44.9106	0.0212		45.951	0.0574		84.388	0.0499		68.8976	0.04255		72.3078	0.04958		67.7994	0.03929		48.7832	0.05039		59.9386	0.05219		59.8808	0.0438		46.1399	0.04931		58.2046	0.05911		44.506	0.0318		46.7602	0.04188		41.2114	0.05795		46.9336	0.04002
56.0082	0.09211		39.7086	0.03206		52.6558	0.0231		44.506	0.04122		61.9616	0.02983		56.1238	0.04212		58.2046	0.0161		58.7826	0.02776		68.9554	0.07583		47.396	0.03448		60.5744	0.07265		51.4238	0.05611		54.2164	0.06983		45.7198	0.05021		52.0778	0.04391		46.2978	0.04971		44.5638	0.03866
59.0138	0.08482		63.5222	0.05405		34.2176	0.03796		50.9796	0.05555		73.0014	0.06448		80.7466	0.02779		61.4992	0.04075		63.3488	0.03168		58.089	0.07882		58.5514	0.03626		56.355	0.03921		43.1777	0.03462		60.4588	0.08337		49.13	0.04674		54.7366	0.03797		57.1642	0.04345		45.7198	0.04615
45.8932	0.0592		45.8354	0.04267		40.8646	0.02637		52.309	0.04965		90.6882	0.09212		75.5446	0.04516		53.5228	0.03092		49.8814	0.03392		49.1878	0.07631		57.511	0.0431		53.5806	0.04816		44.9275	0.04007		48.0318	0.04268		46.2978	0.05069		52.3668	0.04487		43.5812	0.03272		39.9398	0.04269
43.6968	0.08251		39.4196	0.02655		41.7894	0.02991		45.951	0.03636		56.7596	0.03551		67.5682	0.07811		64.8516	0.08095		61.2102	0.03679		61.6726	0.07718		56.0082	0.05127		60.1698	0.04011		39.5389	0.03862		44.217	0.03937		39.1306	0.03382		51.5576	0.06401		39.6508	0.02922		42.1362	0.03137
49.997	0.06748		38.9572	0.0375		43.1188	0.03338		48.0318	0.04787		57.2798	0.03867		67.4526	0.04703		67.3948	0.0523		75.5446	0.05094		54.6788	0.0833		54.043	0.0465		89.6478	0.05283		46.8779	0.03946		50.6328	0.05304		39.8242	0.0475		47.107	0.03504		42.6564	0.05767		32.079	0.01377
62.4818	0.06173		46.4712	0.05869		44.4482	0.02249		37.1076	0.04178		63.869	0.04742		83.8678	0.06174		73.9262	0.03864		67.9728	0.03979		62.4818	0.07295		46.1244	0.05987		46.2978	0.02665		46.4409	0.05343		46.1822	0.04427		41.4426	0.0403		49.7658	0.04833		48.7832	0.04168		38.3214	0.02836
44.2748	0.05198		64.5626	0.04353		39.4196	0.01846		52.9448	0.03306		69.5912	0.04108		93.2892	0.06083		65.7764	0.03395		74.562	0.05556		59.3606	0.0684		68.5508	0.03096		49.0722	0.04952		47.8452	0.04761		43.4078	0.04867		44.0436	0.03615		45.084	0.05302		43.5812	0.04353		44.6794	0.03943
66.1232	0.05148		57.9734	0.06212		39.9976	0.02105		59.823	0.04846		71.2096	0.04542		75.3712	0.05902		66.8168	0.02894		57.3954	0.0295		60.9212	0.09136		56.4128	0.0563		72.4234	0.04462		44.8911	0.03383		44.8528	0.04354		36.414	0.03366		41.905	0.03809		47.5694	0.05996		38.5526	0.05628
47.2226	0.0749		44.3904	0.04685		38.8416	0.02181		50.7484	0.04094		71.0362	0.04664		68.1462	0.06571		93.5204	0.05896		67.7994	0.04393		54.8522	0.06863		62.6552	0.07334		55.0256	0.05255		45.1232	0.04942		50.864	0.05905		53.2338	0.04043		43.639	0.03618		48.7254	0.04618		52.9448	0.04611
46.9914	0.08392		47.8584	0.04148		45.084	0.04746		40.2288	0.0465		84.3302	0.05204		75.8336	0.03979		84.2724	0.02589		68.6664	0.0489		58.7826	0.04628		48.6098	0.05949		49.4768	0.02618		49.8613	0.05589		45.1996	0.04273		39.4774	0.02597		56.7596	0.04757		41.0958	0.02175		51.2108	0.03847
46.9914	0.08392		57.9156	0.05224		43.2922	0.01801		44.6794	0.04648		74.6776	0.0509		63.2332	0.04435		72.1344	0.08412		66.1232	0.03608		65.2562	0.06411		55.0256	0.0497		60.7478	0.03738		50.8451	0.04788		39.4196	0.03076		52.5402	0.06584		53.2916	0.04472		42.0206	0.04089		40.2866	0.03324
47.7428	0.05802		40.2288	0.03839		53.2916	0.04061		46.8758	0.03384		63.291	0.0416		67.5682	0.03139		64.2158	0.031		56.933	0.04345		58.5514	0.0803		62.5974	0.05398		59.3028	0.06631		55.9689	0.06303		45.3152	0.054		40.0554	0.02797		49.4768	0.03443		39.7086	0.0345		41.2114	0.0279
54.8522	0.07695		55.1412	0.06771		40.8646	0.01701		35.547	0.03744		112.421	0.03671		79.3016	0.05425		58.4358	0.04224		61.3258	0.04095		57.1064	0.06344		57.5688	0.03196		60.3432	0.07797		40.7556	0.04382		53.2916	0.04408		41.0958	0.03328		49.419	0.05411		44.4482	0.05395		44.9684	0.03469
46.1244	0.06284		55.3146	0.0486		51.8466	0.02008		50.1126	0.0354		69.9958	0.04703		69.1866	0.05207		58.8982	0.05363		79.6484	0.04864		69.8802	0.10132		72.4812	0.0426		63.1754	0.04207		46.5909	0.05321		36.0672	0.06061		43.928	0.03364		44.217	0.04262		57.5688	0.04485		48.6098	0.03762
57.8578	0.1015		46.24	0.0551		44.8528	0.02117		50.6328	0.05402		51.4998	0.07552		77.9144	0.0542		86.3532	0.02552		70.8628	0.04646		48.3208	0.03418		77.1052	0.04797		68.782	0.06337		38.9032	0.04118		57.8	0.05575		41.6738	0.03443		48.0896	0.03407		48.552	0.05862		46.529	0.05272
50.7484	0.07945		70.5738	0.04296		45.084	0.022		62.713	0.06035		65.8342	0.03398		82.7696	0.07388		65.025	0.0488		71.672	0.05526		60.2854	0.06387		76.296	0.03509		53.9852	0.0578		50.7663	0.08447		44.2748	0.0498		45.8932	0.05546		52.7714	0.03712		44.1014	0.04728		48.1474	0.04121
49.2456	0.06614		53.9274	0.04823		48.3208	0.04745		47.974	0.0323		71.094	0.05121		69.5334	0.05725		67.4526	0.02703		63.1176	0.03058		57.6844	0.06237		53.8118	0.05042		48.2052	0.03746		31.0881	0.02049		42.8298	0.0628		48.8988	0.04058		44.4482	0.0441		43.7546	0.05199		47.107	0.03688
53.4072	0.05874		48.6098	0.04992		41.2692	0.01931		50.4016	0.05051		52.0778	0.02146		85.0238	0.05707		64.3314	0.0271		63.8112	0.03948		61.1524	0.05374		86.6422	0.08308		59.5918	0.05471		44.6365	0.0475		50.2282	0.05074		46.0088	0.03821		43.1766	0.04555		43.5234	0.04787		48.3208	0.03192
58.956	0.08773		62.3084	0.05076		38.0902	0.03045		36.9342	0.04365		58.667	0.03334		58.7248	0.0314		65.3718	0.08167		67.3948	0.02999		57.8	0.08116		53.0026	0.05088		60.8056	0.01905		48.9568	0.06123		50.9218	0.04302		40.8068	0.06569		32.8304	0.02557		55.8926	0.0572		51.0952	0.035
45.0262	0.06262		67.4526	0.03584		40.4022	0.02081		50.575	0.0517		45.7198	0.04131		58.8982	0.04247		55.8348	0.01415		62.1928	0.04234		53.754	0.04706		65.1984	0.04254		56.066	0.06105		40.5016	0.04487		52.3668	0.05305		45.7776	0.03582		48.552	0.04235		49.6502	0.04926		47.0492	0.05074
74.9088	0.06421		70.6316	0.05696		49.5924	0.02583		57.8578	0.04902		50.864	0.05103		85.6018	0.03831		64.8516	0.05425		65.7186	0.0461		59.3028	0.07666		53.754	0.03941		65.4874	0.03053		44.0612	0.03888		44.9106	0.07619		48.6098	0.05389		44.7372	0.04015		53.8696	0.06365		48.4364	0.04934
54.7944	0.08827		43.639	0.04716		42.3096	0.01418		38.0324	0.049		65.2562	0.0434		75.1978	0.1112		66.5278	0.05422		79.0704	0.0318		55.488	0.07467		60.2854	0.0737		45.662	0.03932		41.95	0.03386		48.4942	0.03342		39.7086	0.04745		41.5004	0.04243		42.7142	0.04186		47.7428	0.04777
47.1648	0.05915		59.8808	0.04444		50.7484	0.03236		45.1996	0.04564		63.291	0.03812		70.805	0.07765		62.424	0.06394		66.5278	0.02902		45.5464	0.05556		63.291	0.03086		51.9044	0.0395		46.11	0.05422		50.1704	0.07029		41.9628	0.03038		45.0262	0.04317		43.5234	0.05023		47.9162	0.04417
50.4016	0.06199		46.6446	0.02993		42.5408	0.02008		57.1642	0.03219		59.0138	0.03897		68.493	0.09096		79.3594	0.01983		68.8398	0.04473		62.3084	0.12428		74.7932	0.041		65.7764	0.03438		41.6737	0.05116		57.6844	0.05197		54.9678	0.03916		48.7254	0.05289		41.616	0.03843		45.3152	0.0577
52.7714	0.03728		42.4252	0.07624		43.4078	0.02402		49.5346	0.03488		67.5682	0.03552		67.5104	0.03219		70.805	0.05694		64.6204	0.03282		53.3494	0.10196		59.7074	0.05692		50.1704	0.03202		54.8902	0.07087		49.8236	0.05759		42.483	0.03715		40.9802	0.04753		51.0952	0.07829		45.951	0.02648
82.5962	0.056		57.6844	0.08179		31.501	0.03119		39.7664	0.03506		76.6428	0.06501		74.7932	0.03587		62.5396	0.04502		70.4582	0.05267		52.0778	0.04725		66.759	0.06624		59.4184	0.02859		53.7578	0.06309		41.1536	0.05951		48.552	0.04308		40.2866	0.02866		48.3786	0.04419		52.2512	0.04365
71.2674	0.06386		41.0958	0.04358		42.1362	0.01535		49.997	0.05703		60.5166	0.04485		67.8572	0.03719		63.58	0.0728		58.5514	0.03175		57.9156	0.09067		56.5862	0.03563		67.1636	0.02936		49.8141	0.04896		36.8186	0.04838		45.8354	0.03878		53.2338	0.0443		40.9224	0.05286		55.0256	0.0665
55.3146	0.08981		47.5694	0.06265		49.9392	0.01941		44.9106	0.05666		64.3892	0.03291		92.5378	0.0598		83.4632	0.02403		78.1456	0.03753		49.0144	0.06566		53.0026	0.04306		55.0834	0.03915		48.0926	0.04781		49.6502	0.05453		58.2046	0.04907		40.3444	0.03302		52.4824	0.05492		41.9628	0.0358
64.3892	0.07276		63.4066	0.06168		51.9622	0.03709		43.6968	0.05268		66.0076	0.04208		67.337	0.02619		60.3432	0.01656		64.3892	0.0342		69.3022	0.09416		66.1232	0.06171		62.713	0.05064		53.1956	0.04438		48.3208	0.07537		46.0088	0.05556		49.708	0.0482		44.4482	0.03382		39.015	0.03436
57.7422	0.08577		55.2568	0.04751		41.9628	0.02552		41.0958	0.0552		78.319	0.05572		53.754	0.03802		75.5446	0.04435		58.4936	0.0412		70.4582	0.07142		58.3202	0.05159		49.708	0.03646		39.0234	0.04211		50.5172	0.06972		44.217	0.07785		38.8416	0.03079		41.9628	0.04054		46.24	0.04137
65.4874	0.07796		50.864	0.05238		45.8354	0.03201		40.4022	0.04019		73.8106	0.03783		59.9964	0.04734		57.8578	0.04656		61.4414	0.02459		68.9554	0.08914		57.511	0.05476		69.7646	0.0449		52.6895	0.05195		40.5178	0.03683		47.107	0.04489		50.1126	0.05315		43.4656	0.03996		40.9224	0.0504
53.8118	0.08188		41.5582	0.03383		47.6272	0.05394		47.1648	0.03137		50.4594	0.03001		69.2444	0.06084		65.6608	0.02744		58.8404	0.03418		54.1008	0.06157		55.2568	0.03599		55.8926	0.06584		54.7152	0.05763		43.35	0.05392		43.2344	0.03455		45.5464	0.04469		40.6912	0.05477		40.0554	0.06856
59.1872	0.0632		65.7764	0.03906		53.4072	0.03055		53.0026	0.05717		71.1518	0.0435		69.649	0.07561		59.6496	0.04029		83.9834	0.04297		56.7596	0.05567		56.2394	0.04578		57.9156	0.05351		46.5116	0.05136		56.8752	0.06919		45.1996	0.03613		38.0324	0.03361		54.8522	0.0621		48.3208	0.04852
43.8702	0.06859		44.6216	0.04697		54.2164	0.03887		47.974	0.04739		67.5682	0.0384		61.557	0.04955		63.58	0.03393		62.1928	0.03535		59.1294	0.08098		54.1008	0.05901		84.6192	0.03467		47.6745	0.05938		42.5408	0.06932		44.6794	0.03808		43.4078	0.04615		44.8528	0.0454		43.35	0.0601
51.8466	0.06331		61.3258	0.04969		38.3214	0.08508		59.534	0.04935		81.5558	0.05117		85.255	0.08592		60.2276	0.0273		77.3942	0.05347		60.2276	0.06864		59.534	0.07448		44.5638	0.04515		52.5789	0.06068		47.5116	0.08629		49.0722	0.04562		46.0666	0.03886		41.1536	0.03666		48.4942	0.04079
53.9852	0.09167		47.685	0.04104		51.8466	0.01872		48.3786	0.05138		75.6024	0.03065		74.273	0.06354		78.5502	0.05109		67.9728	0.04363		54.2164	0.04987		64.2158	0.08031		53.0604	0.06174		45.558	0.06581		46.7024	0.06154		48.3786	0.04745		43.35	0.04311		43.8702	0.04602		44.9684	0.02696
60.112	0.08802		44.6794	0.03427		38.726	0.0214		54.6788	0.06714		81.2668	0.05787		69.7068	0.09192		63.002	0.04174		56.9908	0.03516		51.6732	0.04297		56.1816	0.03693		79.5906	0.03809		43.2372	0.04953		43.9858	0.05166		41.7894	0.03876		43.6968	0.04739		45.5464	0.03578		45.7198	0.05712
73.2326	0.07741		42.194	0.04261		43.4078	0.0294		57.6844	0.04018		57.1064	0.03528		63.9268	0.03604		55.3146	0.0281		78.7236	0.04074		53.1182	0.0547		55.7192	0.04088		70.5738	0.03205		50.7394	0.06524		48.4364	0.04612		37.0498	0.04533		41.7316	0.02521		42.483	0.04979		42.3674	0.03372
57.7422	0.09923		38.5526	0.02916		44.506	0.03808		53.176	0.06287		65.1406	0.04893		76.8162	0.06267		66.9902	0.03487		58.7826	0.03529		52.7714	0.06896		55.199	0.04903		59.534	0.03495		48.9917	0.05464		42.3674	0.06345		45.8354	0.05003		48.2052	0.04456		41.905	0.02854		46.7024	0.04948
55.488	0.065		49.419	0.03231		35.2002	0.02787		55.777	0.06279		86.7578	0.04608		69.8802	0.05131		58.5514	0.03499		53.3494	0.03228		54.7366	0.05643		61.1524	0.03198		54.8522	0.04051		51.8166	0.06973		47.8584	0.04451		50.7484	0.0376		41.327	0.03537		46.9914	0.04952		51.9044	0.03845
71.4408	0.07155		41.616	0.04215		33.8708	0.0326		47.3382	0.04953		57.4532	0.04479		63.7534	0.03485		70.4582	0.04863		61.9616	0.02707		64.447	0.04631		60.979	0.05672		81.6714	0.06516		39.9186	0.05264		53.1182	0.05228		47.1648	0.04294		39.8242	0.04158		43.061	0.04528		43.2344	0.03327
55.8926	0.0723		42.3674	0.06316		37.3388	0.03002		39.882	0.03421		57.7422	0.03097		71.9032	0.06816		61.268	0.02782		66.47	0.04509		50.575	0.05471		59.823	0.02326		48.263	0.05761		38.1476	0.03647		51.731	0.06142		38.5526	0.0379		45.084	0.03134		43.2344	0.0398		47.107	0.04658
51.2686	0.06992		48.3208	0.05334		58.8404	0.03465		44.795	0.0443		65.025	0.0654		71.961	0.04724		68.3774	0.06392		79.6484	0.03169		50.8062	0.05154		52.4246	0.04422		65.7764	0.03209		45.6054	0.04712		52.7714	0.06369		47.685	0.04136		31.9634	0.02441		47.396	0.02857		44.3326	0.0353
49.5346	0.07763		46.5868	0.0569		43.5812	0.01852		42.3674	0.04697		64.1002	0.03274		64.1002	0.06218		58.8404	0.03109		60.4588	0.03073		51.9622	0.04544		59.6496	0.05121		45.8354	0.0403		43.5034	0.04297		52.7714	0.06369		39.1884	0.02922		42.1362	0.02136		38.6682	0.04323		41.038	0.02844
47.2804	0.08568		43.061	0.04945		54.6788	0.02329		39.8242	0.05181		62.0194	0.02973		73.695	0.08944		69.4756	0.05126		64.447	0.03139		70.227	0.06593		50.9218	0.03466		72.4234	0.05812		46.026	0.05902		48.1474	0.06716		36.1828	0.02145		46.9336	0.04222		46.9336	0.03895		36.3562	0.03366
53.0026	0.07071		53.754	0.0863		37.5122	0.03476		52.887	0.03323		57.6844	0.07319		66.2966	0.04582		48.8988	0.03342		85.4862	0.03128		55.777	0.04735		52.887	0.03981		55.9504	0.04621		53.7077	0.05493		38.3792	0.0384		42.1362	0.03167		43.6968	0.03531		41.7316	0.04665		41.8472	0.02772
55.7192	0.05251		41.8472	0.05064		41.5582	0.02912		48.7254	0.04904		58.7826	0.03718		73.8106	0.06047		66.1232	0.02425		59.5918	0.05422		61.0946	0.04874		68.9554	0.05415		89.2432	0.06635		45.3248	0.05893		48.263	0.04159		42.1362	0.04228		39.304	0.04141		51.3264	0.04435		49.419	0.03551
55.7192	0.05251		60.7478	0.05136		41.616	0.01989		59.6496	0.0453		62.0772	0.02885		75.3712	0.05524		94.4452	0.02031		64.6782	0.03828		67.7416	0.07964		51.3264	0.02597		47.685	0.04262		47.231	0.05152		48.4942	0.0512		43.8702	0.03128		53.465	0.04761		37.1076	0.0361		41.327	0.03077
54.621	0.06107		45.6042	0.05103		36.414	0.02404		44.506	0.03779		78.3768	0.05819		64.2158	0.02251		74.3308	0.06202		63.4066	0.01956		61.6726	0.09779		49.1878	0.02332		66.759	0.05077		53.4113	0.04251		48.263	0.05254		49.6502	0.04035		47.1648	0.0388		52.4824	0.04148		45.6042	0.02584
48.841	0.08391		53.5228	0.03257		45.084	0.01886		47.2804	0.04933		56.4706	0.03759		74.851	0.09501		62.0772	0.03392		61.0946	0.02343		56.933	0.06656		51.8466	0.04667		61.6148	0.05968		47.3107	0.04403		43.1188	0.0519		46.5868	0.03829		36.0094	0.02976		45.6042	0.04015		44.1592	0.03453
51.6732	0.01385		57.6266	0.06371		43.9858	0.0138		61.7304	0.04522		63.8112	0.02373		67.6838	0.04723		73.406	0.0452		72.3078	0.04108		59.0138	0.06521		63.4644	0.04568		67.4526	0.09461		54.2527	0.06457		51.9044	0.05076		49.6502	0.04895		50.9796	0.03486		45.3152	0.05712		37.6856	0.03265
66.5856	0.08032		46.5868	0.0521		37.9746	0.02637		43.5812	0.04162		68.1462	0.0372		77.9144	0.05445		73.117	0.04601		67.4526	0.04527		55.3724	0.07255		50.3438	0.06393		58.0312	0.02472		47.9752	0.06416		49.0144	0.05308		41.5582	0.04339		39.593	0.03613		53.0604	0.06567		40.5178	0.04898
53.6962	0.05956		75.6602	0.05798		39.0728	0.03162		55.199	0.05861		77.2786	0.04809		60.8634	0.06195		66.9902	0.0492		76.4694	0.03818		56.7018	0.08305		52.8292	0.04117		51.9622	0.03027		41.5288	0.04966		46.5868	0.06279		48.7254	0.04875		41.5004	0.04059		47.3382	0.0786		50.5172	0.03152
44.8528	0.07164		61.6726	0.03371		44.3326	0.05359		47.8584	0.04865		95.948	0.03844		69.649	0.08523		72.9436	0.06389		65.1984	0.0253		57.2798	0.08059		74.2152	0.05153		81.2668	0.04615		42.8919	0.04134		39.8242	0.04054		43.7546	0.039		44.795	0.04294		39.0728	0.03145		47.7428	0.04789
45.662	0.08733		54.2742	0.02784		41.327	0.0421		45.662	0.04647		45.7776	0.03776		63.1176	0.03704		53.3494	0.02079		62.0194	0.0265		66.5856	0.05664		70.0536	0.05512		86.8156	0.04446		50.7454	0.04883		50.286	0.04555		46.0088	0.05283		39.8242	0.02446		44.1592	0.03765		55.3724	0.03649
50.5172	0.07499		47.396	0.04349		38.6682	0.02489		44.6794	0.04714		55.6036	0.03527		84.099	0.04665		72.5968	0.04478		63.1754	0.02642		65.025	0.07287		56.933	0.03365		85.7752	0.04757		44.7993	0.05636		44.6794	0.04744		39.8242	0.03355		41.4426	0.03865		48.841	0.03561		49.3034	0.03836
45.662	0.07569		49.997	0.08642		49.0722	0.05954		43.1188	0.04899		64.2158	0.03171		78.2612	0.0527		73.0592	0.04383		91.4974	0.04264		60.979	0.08129		60.3432	0.04132		60.112	0.05818		40.1257	0.04134		55.5458	0.06094		39.593	0.05208		47.685	0.02981		37.9168	0.03027		42.8298	0.04558
50.4016	0.08788		52.6558	0.04347		33.6974	0.03664		38.148	0.04429		69.7646	0.0374		72.4812	0.04189		70.6894	0.02565		72.7124	0.05071		50.1126	0.06979		66.1232	0.07177		61.4414	0.06138		47.0827	0.0656		46.4712	0.06549		35.8938	0.03608		42.0206	0.03965		41.7894	0.03166		43.1188	0.03444
66.181	0.08758		41.038	0.06611		45.8354	0.02729		57.9734	0.04432		53.465	0.04371		69.3022	0.04567		66.759	0.05488		54.2164	0.02199		54.4476	0.07002		57.222	0.06175		76.4694	0.02009		47.5264	0.04969		46.0666	0.04892		40.749	0.04298		42.7142	0.03177		37.2232	0.04386		51.6154	0.04688
70.9206	0.05616		73.406	0.07044		41.0958	0.02788		42.8298	0.03659		73.984	0.05372		61.9616	0.02827		66.181	0.02304		62.5974	0.03448		58.4358	0.05835		56.7596	0.04849		55.3146	0.04459		52.8711	0.0742		45.5464	0.04694		40.171	0.0355		43.2344	0.04715		44.4482	0.04339		46.4712	0.03395
47.8006	0.0719		45.2574	0.03095		43.7546	0.03142		34.6222	0.0291		57.9156	0.03433		93.058	0.05409		80.1108	0.0261		61.3836	0.03929		53.6384	0.02056		63.2332	0.05713		70.9206	0.06458		47.0617	0.05444		46.0666	0.05876		44.4482	0.03831		40.8068	0.02966		38.0902	0.05439		46.6446	0.02762
48.1474	0.07059		51.7888	0.0489		41.038	0.01951		49.13	0.06446		49.13	0.03398		69.2444	0.04501		55.8926	0.02362		63.0598	0.02939		60.4588	0.05672		53.9852	0.08895		57.4532	0.02768		41.0665	0.04613		42.772	0.06322		37.9168	0.0362		51.9044	0.04314		45.6042	0.03714		52.4824	0.04526
46.9914	0.06536		69.5912	0.07752		46.0666	0.03089		42.6564	0.04506		62.0772	0.04989		56.933	0.03816		69.0132	0.04782		69.8224	0.03835		61.6148	0.07311		55.488	0.04007		52.3668	0.03478		46.0373	0.04308		55.8926	0.06298		49.8236	0.03624		48.263	0.03343		47.2226	0.04526		38.6682	0.03119
47.974	0.06343		51.4998	0.06961		44.2748	0.0468		41.0958	0.04664		70.3426	0.02932		77.7988	0.03652		70.0536	0.03033		63.002	0.0214		61.268	0.07172		54.1008	0.06703		75.4868	0.04252		30.09	0.0157		50.1126	0.05205		48.3786	0.04797		41.1536	0.04956		43.5234	0.03829		43.5234	0.0294
59.4184	0.06812		47.107	0.04309		52.8292	0.03876		47.396	0.04175		64.447	0.03254		55.6614	0.02973		65.3718	0.04275		60.3432	0.03173		59.3028	0.04747		72.7702	0.05577		66.6434	0.04145		58.2838	0.07104		50.2282	0.07056		47.396	0.04456		47.4538	0.04285		42.3674	0.04866		48.841	0.03478
62.8864	0.0571		52.7136	0.04796		46.0088	0.02043		54.7366	0.05923		57.222	0.04098		55.8926	0.03375		54.5054	0.04579		74.1574	0.02003		46.9336	0.04444		61.4992	0.0556		89.8212	0.05547		41.7088	0.0447		49.13	0.0553		41.3848	0.03815		44.217	0.03823		37.8012	0.04271		39.8242	0.04719
53.9852	0.06729		40.8646	0.03972		44.6794	0.02669		44.7372	0.04345		51.2686	0.02738		77.5676	0.07976		71.7298	0.04633		71.4986	0.04179		51.2108	0.07546		61.7304	0.05182		53.8696	0.04811		45.6426	0.05784		46.1244	0.07589		45.1996	0.05383		40.2288	0.02589		46.24	0.02871		46.3556	0.03718
65.025	0.06929		44.7372	0.05866		44.9684	0.01706		50.575	0.05822		57.6266	0.03368		93.2892	0.05958		68.782	0.0416		67.7994	0.04582		49.419	0.04446		64.5626	0.07228		45.7776	0.05109		44.2475	0.05009		53.9852	0.07244		48.6098	0.04482		60.5166	0.05329		41.905	0.05893		43.9858	0.04283
49.3034	0.06507		52.5402	0.05417		45.1418	0.03446		35.3158	0.02882		59.1872	0.0313		67.8572	0.05536		77.8566	0.06246		69.1288	0.03555		70.227	0.07266		55.488	0.05477		53.4072	0.03298		50.4946	0.0767		41.5582	0.04215		30.923	0.0248		51.2686	0.05059		40.5178	0.03784		46.818	0.0344
54.6788	0.0811		73.984	0.05479		41.8472	0.01122		33.9864	0.0519		62.713	0.0406		79.0126	0.0667		70.4004	0.02127		56.4706	0.02175		58.956	0.05519		54.9678	0.05279		67.7416	0.03777		45.4238	0.05761		45.084	0.04192		39.6508	0.04882		36.8764	0.04036		42.0206	0.04091		39.4774	0.05035
42.2518	0.06394		49.2456	0.03814		36.2984	0.02962		44.8528	0.03968		59.245	0.04257		70.516	0.06459		50.1704	0.04338		59.5918	0.01916		51.442	0.05868		67.1058	0.0485		60.979	0.04809		50.3899	0.05388		48.0318	0.06473		41.2114	0.03087		48.0318	0.04722		36.414	0.03688		38.7838	0.03397
51.3842	0.06438		43.5234	0.03894		45.1996	0.01464		49.3034	0.05515		64.7938	0.03946		70.6316	0.03617		55.9504	0.02059		69.7068	0.03478		57.6266	0.06131		75.7758	0.05844		75.429	0.04304		45.7165	0.05885		50.6328	0.06046		46.2978	0.03319		51.5576	0.0282		44.506	0.05058		38.8994	0.03398
49.1878	0.0667		44.2748	0.05813		42.9454	0.01385		46.0088	0.03522		67.048	0.05011		58.3202	0.06487		66.0654	0.02101		68.8398	0.03528		48.9566	0.04634		63.2332	0.04579		51.9044	0.02506		55.3819	0.04928		49.997	0.07362		44.9106	0.03868		43.4656	0.03225		45.373	0.053		40.2866	0.03438
46.6446	0.05672		57.1064	0.05189		42.2518	0.02528		40.9224	0.04438		60.8634	0.04405		71.7298	0.03523		67.2792	0.0563		59.1294	0.04765		59.9386	0.05418		50.1704	0.0524		50.2282	0.03345		53.9306	0.0581		46.818	0.06201		49.13	0.03519		42.4252	0.05818		46.5868	0.05445		43.4656	0.04307
51.9622	0.09019		41.7316	0.05607		52.0778	0.02173		46.9914	0.0402		64.2158	0.04159		73.9262	0.0632		57.1064	0.03327		53.6962	0.03751		62.4818	0.06164		61.9616	0.03846		43.9858	0.04186		44.7226	0.05152		52.7714	0.04918		45.951	0.03823		43.5234	0.04422		45.0262	0.03909		43.9858	0.04024
45.7776	0.06566		52.309	0.05113		38.4948	0.02684		60.1698	0.05637		61.3836	0.03802		55.777	0.03933		75.8336	0.09061		60.401	0.03963		55.3724	0.05093		58.7826	0.03936		64.5048	0.04714		46.1234	0.05		49.8236	0.06739		44.9684	0.03695		38.9572	0.04474		45.1996	0.03846		49.5924	0.06633
58.7248	0.10378		49.9392	0.03728		35.6048	0.0261		39.0728	0.0462		78.1456	0.05165		87.1046	0.06623		91.3818	0.06212		79.0704	0.05549		50.1126	0.05226		59.7652	0.0471		50.1126	0.04289		50.8734	0.05218		47.7428	0.0841		45.2574	0.02581		42.194	0.03093		39.7086	0.034		39.5352	0.03954
50.1126	0.0537		43.5812	0.03317		47.107	0.05608		32.3102	0.02473		66.5856	0.01902		88.6652	0.07059		81.2668	0.03865		70.0536	0.02986		59.3028	0.06593		58.956	0.03887		71.6142	0.03427		48.1604	0.05814		51.3842	0.06371		39.7664	0.03918		49.4768	0.05364		50.4594	0.05421		44.9684	0.03814
44.6216	0.09936		46.0088	0.04257		58.7248	0.03185		48.9566	0.05817		49.1878	0.02465		56.2972	0.04884		73.2904	0.02799		89.4166	0.04961		54.2742	0.06967		54.5632	0.04727		60.401	0.07296		49.2813	0.07243		51.9622	0.04905		39.3618	0.02521		45.7776	0.02854		46.818	0.04047		42.194	0.03315
59.1294	0.06937		59.3028	0.06279		48.1474	0.03098		50.9218	0.04495		57.3376	0.01761		94.7342	0.06629		61.268	0.04677		56.8174	0.04151		68.5508	0.0866		50.864	0.04865		60.2276	0.05042		54.6067	0.06213		41.2114	0.04791		44.6794	0.05044		45.084	0.03586		47.685	0.04033		43.1188	0.02897
47.0492	0.06205		54.3898	0.05292		45.2574	0.02377		42.0206	0.03478		54.1008	0.04501		72.3078	0.0461		72.5968	0.03835		59.4762	0.03845		57.1642	0.07261		55.0256	0.03395		69.5912	0.04605		43.7251	0.04909		45.5464	0.06302		35.0268	0.04273		51.8466	0.05403		44.9684	0.05519		42.194	0.03315
46.818	0.06956		41.905	0.03532		40.171	0.02176		41.3848	0.0336		66.8746	0.04012		55.8926	0.05249		54.1008	0.04696		68.9554	0.06509		51.2686	0.05737		62.0772	0.03792		81.0934	0.04948		54.7465	0.07282		52.9448	0.05838		44.2748	0.0342		43.35	0.04279		47.685	0.06307		46.6446	0.07458
58.2046	0.05635		62.9442	0.0498		50.2282	0.02036		38.2636	0.04717		68.8976	0.03294		74.6776	0.03602		61.0368	0.03347		77.2208	0.03914		54.621	0.05999		54.621	0.06036		73.2904	0.04275		66.4199	0.09668		46.3556	0.05175		39.882	0.03196		49.6502	0.03946		42.7142	0.03672		38.2058	0.036
45.662	0.07518		72.539	0.07568		46.5868	0.03897		44.6794	0.04126		75.429	0.05153		81.4402	0.04889		94.6186	0.06576		67.1058	0.03464		51.5576	0.07012		66.0076	0.05307		55.777	0.03134		44.3789	0.03917		46.0666	0.0449		37.8012	0.04216		50.286	0.03643		48.8988	0.04245		39.8242	0.03834
74.9088	0.05897		39.015	0.01958		48.4364	0.02291		56.4128	0.04322		47.3382	0.04622		65.603	0.05302		55.9504	0.04448		69.1866	0.05408		52.1934	0.07451		49.6502	0.04349		54.8522	0.03969		37.4395	0.03605		51.0374	0.07194		45.7198	0.03953		44.1592	0.03978		50.7484	0.03387		47.107	0.02556
47.8584	0.07233		50.2282	0.04766		52.4824	0.02399		33.8708	0.03149		78.5502	0.03693		84.7926	0.05234		68.1462	0.05095		67.1058	0.04274		57.9734	0.06129		65.3718	0.06553		72.0188	0.04881		47.0521	0.06192		46.7602	0.04256		43.8124	0.03189		49.8814	0.03365		44.1592	0.04719		42.5408	0.02828
79.5906	0.08173		58.7826	0.02804		44.217	0.03828		36.0094	0.04379		54.7366	0.02401		63.7534	0.01672		63.4644	0.04978		69.1866	0.05301		46.1244	0.04848		65.5452	0.04676		56.1816	0.03921		46.7106	0.05844		50.575	0.05393		38.6104	0.04131		35.1424	0.0245		43.928	0.05599		44.1014	0.04293
66.3544	0.08001		52.7136	0.04349		62.5974	0.01467		34.2754	0.02157		93.4626	0.05351		71.672	0.08614		70.805	0.02767		56.933	0.03052		58.4936	0.06693		55.8926	0.04104		70.1692	0.03644		50.0908	0.05825		42.5408	0.05424		42.0784	0.04132		50.575	0.0422		41.5004	0.06225		30.1716	0.03474
47.5116	0.09431		45.1418	0.06374		48.2052	0.07985		35.258	0.0431		80.1108	0.03247		83.6944	0.09521		71.4408	0.08852		93.8094	0.05828		68.6086	0.05647		61.1524	0.05197		61.1524	0.05426		51.9234	0.05697		45.2574	0.04668		47.396	0.05039		49.0144	0.04782		46.1244	0.05823		50.1126	0.04192
69.7068	0.06668		54.2164	0.03531		44.1014	0.02363		49.419	0.04801		76.9896	0.05553		64.9672	0.09486		63.9268	0.0204		96.815	0.06479		73.0014	0.13822		57.8	0.04313		56.355	0.1114		52.0228	0.05845		54.332	0.04186		42.7142	0.05727		45.8354	0.03942		51.442	0.04852		48.4364	0.03675
50.6328	0.08183		45.662	0.04948		36.703	0.02188		59.4184	0.06032		72.7702	0.04556		76.4116	0.06568		74.7354	0.05233		73.4638	0.03899		64.1002	0.05669		59.9386	0.05159		71.094	0.05643		39.6701	0.06084		51.0374	0.06022		47.8584	0.03008		40.9802	0.02477		44.5638	0.0384		46.1244	0.04157
62.424	0.08403		43.639	0.05094		37.1654	0.02773		54.7944	0.05306		71.3252	0.03515		69.7646	0.08554		67.9728	0.0254		58.378	0.03631		51.9622	0.06355		64.2158	0.05476		76.5272	0.03635		49.4744	0.05501		54.332	0.04186		42.1362	0.05356		44.4482	0.03785		43.8702	0.03641		36.9342	0.0292
54.332	0.06124		85.255	0.04745		39.1306	0.02385		43.4078	0.04745		65.0828	0.04286		59.8808	0.04168		78.4346	0.03396		63.9268	0.02776		47.8584	0.06482		69.1866	0.03871		49.708	0.04037		37.96	0.04192		51.0374	0.06022		42.1362	0.04445		45.951	0.04722		38.6104	0.05195		42.4252	0.03701
53.8118	0.10322		48.9566	0.04643		47.0492	0.04035		47.396	0.05056		82.1916	0.05893		71.2096	0.06199		57.1642	0.02191		64.158	0.0318		47.685	0.03051		49.3034	0.04293		57.2798	0.0421		49.8699	0.066		56.8174	0.06812		45.7198	0.04128		43.2922	0.04464		50.4016	0.05381		45.1996	0.03993
53.5228	0.06986		39.4196	0.04348		49.0144	0.01916		37.1654	0.03578		70.1114	0.0378		73.8684	0.0451		88.723	0.0389		58.5514	0.02866		81.498	0.10048		84.2146	0.04588		60.1698	0.08814		53.1751	0.09879		51.153	0.05993		46.6446	0.04474		40.1132	0.03763		43.35	0.04727		35.7782	0.0147
52.598	0.08729		46.529	0.04304		46.2978	0.01571		49.708	0.05826		60.1698	0.02935		70.6894	0.03472		68.0306	0.04479		62.8864	0.04916		53.2916	0.05136		61.268	0.04972		71.7876	0.04382		46.3717	0.05436		48.3786	0.0545		42.4252	0.04734		44.6794	0.03316		43.061	0.04878		43.639	0.02725
52.598	0.08729		41.3848	0.0362		38.8994	0.02977		43.8702	0.0553		57.7422	0.04655		84.5614	0.04318		72.0188	0.03687		84.8504	0.03424		47.5694	0.02115		52.887	0.04639		64.3314	0.0408		54.7891	0.05661		42.4252	0.04902		46.0666	0.05454		44.9684	0.04323		47.2804	0.03287		40.9802	0.04177
59.4762	0.06252		57.0486	0.04587		40.4022	0.02456		35.7782	0.03987		73.8684	0.05628		59.534	0.07402		54.5632	0.03347		54.8522	0.05558		56.1238	0.06483		57.222	0.05026		71.6142	0.07132		47.6478	0.0469		42.772	0.04705		44.0436	0.05151		42.5408	0.03641		40.3444	0.04035		59.0138	0.05092
45.1418	0.06626		54.7366	0.02974		44.3904	0.05861		52.0778	0.06362		90.8038	0.06445		65.3718	0.0558		57.6844	0.04752		66.8746	0.02027		63.9268	0.06746		63.291	0.05979		80.7466	0.03054		40.5281	0.0506		54.7944	0.07648		48.4364	0.05035		35.8938	0.02792		50.9796	0.05051		59.4762	0.05104
77.5098	0.05469		46.5868	0.03781		57.9734	0.03967		38.437	0.03125		73.8106	0.04628		71.7298	0.04612		73.406	0.03708		62.424	0.02078		53.0604	0.0844		56.4128	0.07756		55.0256	0.05198		50.1299	0.04897		48.3786	0.0545		48.1474	0.04432		43.35	0.04857		40.46	0.05197		55.7192	0.06843
51.4998	0.07735		51.442	0.04243		42.1362	0.04079		46.818	0.0432		56.8752	0.0422		58.8982	0.03751		81.0356	0.02251		72.25	0.04683		49.0144	0.05261		62.3084	0.07491		72.9436	0.0306		50.7777	0.05028		42.4252	0.04902		39.4196	0.02219		45.2574	0.04931		40.2866	0.04337		42.772	0.04338
53.9852	0.06828		43.5234	0.0219		56.5862	0.0413		53.9274	0.04934		61.4414	0.03587		80.4576	0.04567		61.846	0.05237		59.6496	0.05479		62.424	0.11168		64.447	0.09825		83.6366	0.07503		48.8138	0.04346		55.0834	0.07001		44.4482	0.0476		41.8472	0.03357		48.6676	0.05152		44.5638	0.02721
41.8472	0.06135		63.869	0.06837		39.1884	0.03134		51.442	0.05771		75.6602	0.03677		84.1568	0.05059		81.787	0.01744		83.521	0.05777		54.621	0.03863		47.9162	0.04634		44.2748	0.03857		51.5106	0.0682		45.4308	0.04936		45.3152	0.02606		40.3444	0.03436		43.35	0.04964		48.841	0.04206
59.1294	0.0719		46.6446	0.04022		53.9274	0.03126		52.887	0.04425		81.9026	0.05857		66.759	0.03626		59.7074	0.14333		66.759	0.03488		52.7136	0.05962		51.9044	0.05101		70.3426	0.0566		41.397	0.0475		54.7944	0.04956		52.1934	0.03346		44.9106	0.03195		51.6732	0.04337		39.593	0.02692
55.0834	0.08427		56.2394	0.04058		50.9218	0.02334		58.378	0.04599		66.1232	0.06469		78.2034	0.04571		63.7534	0.04164		70.1692	0.03932		53.6962	0.04919		61.9616	0.04977		50.9796	0.05722		48.6191	0.0586		52.0778	0.0594		39.7086	0.04689		49.6502	0.04625		43.1766	0.03057		43.061	0.0359
49.9392	0.07434		43.1188	0.04765		36.5296	0.0418		53.5806	0.04015		57.5688	0.0378		73.2326	0.03937		82.1916	0.02922		60.8056	0.0344		63.869	0.07459		72.8858	0.04754		59.3606	0.02918		50.7951	0.05262		40.6912	0.04433		37.7434	0.04143		38.6682	0.03048		39.593	0.03769		34.3332	0.02579
43.061	0.07949		47.396	0.04622		45.6042	0.03332		46.8758	0.05268		58.0312	0.03757		67.5104	0.02842		68.6086	0.0286		73.3482	0.02391		57.9156	0.08648		55.0256	0.05228		74.9666	0.04201		37.098	0.03152		41.1536	0.05536		41.905	0.04379		44.5638	0.04987		53.465	0.04588		43.8702	0.02738
60.69	0.07585		48.3208	0.04334		40.1132	0.02048		39.593	0.03942		77.6832	0.05814		92.48	0.04068		61.2102	0.0338		61.3836	0.02748		45.5464	0.02683		53.5806	0.04157		59.4762	0.0513		31.2189	0.03559		51.8466	0.05417		47.4538	0.0752		52.9448	0.05699		41.8472	0.0412		35.4314	0.03938
54.91	0.09942		38.6104	0.02604		47.0492	0.02811		34.2754	0.03562		69.1866	0.03155		65.6608	0.04749		60.6322	0.03562		65.603	0.03814		62.5974	0.07102		57.222	0.0285		50.7484	0.03875		47.4596	0.05784		45.8354	0.05833		54.8522	0.04214		44.3904	0.03782		43.5234	0.04455		45.1996	0.04963
44.3904	0.05394		62.7708	0.03401		47.0492	0.01774		37.1076	0.04435		48.0318	0.04291		68.6664	0.07538		87.1046	0.0747		76.7006	0.04881		58.4936	0.08392		49.5346	0.03168		55.0834	0.02749		53.7969	0.06693		40.6334	0.0437		38.7838	0.04418		47.1648	0.0425		42.3674	0.04743		42.194	0.02536
49.708	0.07051		68.5508	0.04196		42.5408	0.01637		45.5464	0.04488		59.0716	0.0306		57.0486	0.03903		66.4122	0.04189		61.557	0.02862		49.6502	0.05061		51.2686	0.05349		68.8398	0.02588		58.3598	0.05349		49.9392	0.07672		39.9976	0.03011		45.7776	0.052		39.304	0.04536		45.8932	0.04563
54.332	0.12299		46.1244	0.02795		46.1244	0.03323		46.5868	0.03526		52.02	0.047		67.6838	0.0535		74.5042	0.02479		68.4352	0.05576		55.6036	0.07603		80.9778	0.0518		65.314	0.02316		49.8006	0.05208		49.9392	0.07672		50.5172	0.05109		47.8006	0.04788		45.2574	0.03376		46.4134	0.02717
54.7944	0.08964		42.1362	0.04928		43.9858	0.02306		37.57	0.03293		63.869	0.04221		74.5042	0.04918		70.9206	0.04777		69.7068	0.03487		56.4706	0.04526		63.58	0.04338		61.9038	0.03676		50.6779	0.05693		48.7254	0.06518		45.3152	0.04449		51.5576	0.04192		48.0318	0.04429		46.0088	0.03039
54.91	0.0624		53.6962	0.02989		48.841	0.03451		49.1878	0.0415		75.0244	0.02786		65.4296	0.03018		65.8342	0.01872		68.6086	0.03061		65.6608	0.07339		61.268	0.05068		73.1748	0.03392		47.2338	0.04663		44.0436	0.04718		49.0722	0.04576		38.8994	0.03236		56.0082	0.0455		40.749	0.0292
57.4532	0.08578		53.9274	0.04745		48.9566	0.01093		47.396	0.04499		58.089	0.0462		78.608	0.09167		66.6434	0.06787		64.7938	0.01607		56.4128	0.0915		64.0424	0.05839		56.066	0.05863		40.7037	0.03933		51.731	0.05527		43.5812	0.0334		41.7316	0.02343		40.2288	0.05295		40.2288	0.03932
52.887	0.07077		70.8628	0.04459		39.5352	0.02539		45.1418	0.03405		89.4166	0.03305		85.7752	0.04369		59.7074	0.05332		55.199	0.03345		66.0654	0.08371		57.9156	0.04166		72.539	0.03876		52.2078	0.06159		37.7434	0.05197		45.5464	0.037		48.3208	0.0605		51.5576	0.0432		44.217	0.03804
48.4364	0.08201		38.437	0.06267		41.7316	0.02028		49.1878	0.06271		66.2388	0.03479		67.626	0.11567		53.4072	0.01542		71.2096	0.04178		66.4122	0.0363		61.6148	0.0604		65.5452	0.0366		40.7929	0.03475		48.841	0.05482		48.4364	0.03702		42.8876	0.03274		46.818	0.05524		39.304	0.03397
62.5974	0.06026		42.4252	0.05867		39.1306	0.03402		48.4942	0.03772		54.5054	0.04066		62.4818	0.04422		73.7528	0.03261		80.8622	0.05046		58.8982	0.06697		57.3376	0.06274		58.378	0.0588		53.1512	0.05889		49.0722	0.05156		40.2866	0.02949		39.0728	0.02629		36.0094	0.04746		46.7024	0.04433
53.0604	0.06561		45.4308	0.06152		38.4948	0.08341		40.4022	0.04595		73.1748	0.03267		97.104	0.06662		86.7578	0.0341		59.4762	0.03512		65.025	0.06458		51.0952	0.06566		65.7186	0.03784		42.8353	0.05573		43.1766	0.05376		42.4252	0.0424		45.1418	0.0366		42.8298	0.03288		43.9858	0.03884
60.2854	0.08906		40.0554	0.03433		41.9628	0.04657		60.401	0.06262		67.626	0.0266		56.1238	0.04402		62.7708	0.02329		67.4526	0.03053		54.7366	0.05986		66.2966	0.05594		72.1922	0.04432		48.8647	0.06217		47.7428	0.04739		42.3096	0.03863		54.043	0.04659		42.1362	0.03523		42.772	0.03727
41.7894	0.05651		52.887	0.04565		41.7894	0.02381		46.0666	0.01715		76.5272	0.05471		66.4122	0.05702		65.2562	0.04678		74.9088	0.04868		56.644	0.0847		55.6614	0.03938		57.1642	0.05482		43.3997	0.05456		56.7596	0.0629		40.46	0.0354		48.4942	0.03102		43.061	0.03963		41.6738	0.03894
72.828	0.06602		56.5284	0.03281		44.4482	0.03153		42.0784	0.02761		69.7068	0.02748		69.7646	0.02248		58.0312	0.01862		72.6546	0.04721		58.2624	0.09286		55.1412	0.04307		59.3028	0.02486		54.8601	0.0673		55.6614	0.07504		42.8876	0.04799		40.1132	0.03669		35.258	0.03784		53.465	0.04298
52.3668	0.06992		51.6732	0.04772		37.1654	0.01879		60.979	0.05249		69.7068	0.05128		74.9666	0.05651		60.979	0.04728		54.6788	0.03011		55.3724	0.0603		61.3836	0.07274		63.58	0.03136		46.4519	0.04626		46.6446	0.04633		47.5116	0.02779		46.7024	0.04959		53.9852	0.05294		51.3264	0.03183
57.511	0.06385		46.24	0.05519		44.3326	0.03543		38.9572	0.02907		56.8174	0.04087		77.9722	0.03677		94.792	0.04639		76.7584	0.03661		53.9852	0.06404		53.0604	0.04027		53.6384	0.04221		46.2005	0.05323		49.0722	0.05602		38.437	0.03783		34.969	0.02515		46.1822	0.06163		49.0722	0.042
73.8106	0.09339		46.3556	0.03846		30.2872	0.02815		51.8466	0.04845		53.0026	0.03513		76.7006	0.02678		53.2338	0.01587		65.4874	0.02982		67.915	0.05997		56.644	0.05605		61.6726	0.07647		55.1392	0.05929		49.997	0.06437		46.3556	0.04095		55.0256	0.05511		39.0728	0.04899		49.1878	0.05764
42.0206	0.03071		51.4998	0.04982		51.442	0.04058		61.0946	0.05127		70.2848	0.04399		69.4756	0.05601		56.7018	0.03019		71.2096	0.04861		56.933	0.04801		65.4296	0.0527		56.7596	0.04517		49.5127	0.05542		51.442	0.06013		46.8758	0.04267		48.7254	0.04817		50.864	0.03629		46.3556	0.03835
47.5694	0.08919		44.217	0.03391		48.4942	0.02508		47.5694	0.0295		79.186	0.07508		77.6832	0.03882		66.8168	0.04766		71.383	0.03938		61.3258	0.04488		56.2972	0.06935		75.1978	0.03877		48.3635	0.05474		44.9684	0.05799		44.8528	0.05012		51.6732	0.03732		43.0032	0.05812		44.6216	0.03849
51.7888	0.05859		52.1356	0.04441		33.813	0.02875		45.6042	0.05099		48.0896	0.04382		75.718	0.04426		59.0716	0.0302		61.6726	0.01861		54.1586	0.05363		66.9324	0.05377		56.355	0.07565		48.9774	0.05142		46.1244	0.06689		39.2462	0.02626		52.02	0.06098		40.2288	0.03119		45.5464	0.06076
59.0138	0.06669		47.7428	0.04808		40.4022	0.02153		73.5216	0.05583		62.0772	0.03126		79.764	0.06069		60.112	0.02924		71.7876	0.03235		55.0834	0.08142		54.2742	0.03995		72.7702	0.0461		50.1668	0.05689		46.4134	0.0538		41.616	0.08302		43.35	0.03511		44.0436	0.04137		40.5178	0.0487
59.3606	0.05724		47.2226	0.03768		41.0958	0.02982		50.4594	0.05068		76.4694	0.04492		68.9554	0.03491		60.401	0.02611		60.5744	0.03782		66.2388	0.11496		64.447	0.04545		61.6726	0.07044		47.0173	0.07278		48.263	0.05896		47.8584	0.03491		38.3792	0.03288		46.6446	0.05101		46.24	0.0415
45.5464	0.05665		46.1244	0.02764		47.2226	0.0363		45.8932	0.04155		64.736	0.0317		73.9262	0.07666		76.4116	0.02976		64.7938	0.04057		66.8168	0.07359		59.4184	0.04546		63.58	0.0471		35.5567	0.0482		46.4134	0.0538		43.2344	0.03139		46.9336	0.04995		48.6098	0.03892		37.6278	0.03265
46.818	0.05009		60.401	0.04726		42.3674	0.05098		41.327	0.04262		76.9318	0.06129		79.186	0.05508		62.713	0.0472		85.1972	0.04376		56.8174	0.04919		52.1934	0.04372		75.718	0.0287		44.654	0.04759		43.8702	0.05503		58.1468	0.07692		51.6154	0.04258		37.3966	0.02353		46.9336	0.0447
47.2804	0.04669		58.2624	0.06516		47.8006	0.03226		50.5172	0.04741		60.8056	0.0328		82.365	0.05178		56.355	0.02613		49.7658	0.03126		59.534	0.0548		61.4414	0.03577		82.8274	0.06531		48.3128	0.06188		50.9796	0.05159		43.1766	0.03463		47.9162	0.0348		41.6738	0.03297		43.35	0.03058
56.5284	0.07888		45.7776	0.04355		43.7546	0.0367		57.1064	0.04482		54.6788	0.04549		80.2842	0.09374		65.9498	0.0491		60.979	0.03395		53.8118	0.05841		53.3494	0.03976		69.5334	0.04179		46.9487	0.05548		51.153	0.03993		47.396	0.03305		41.2114	0.03332		45.1996	0.05324		42.772	0.0348
48.7832	0.06815		52.1356	0.05059		58.4358	0.03975		34.2754	0.03429		52.4824	0.0289		77.163	0.08006		60.5166	0.02389		70.805	0.05301		52.598	0.05457		51.9044	0.0695		59.245	0.0468		45.1701	0.04589		45.951	0.05116		38.2058	0.03056		46.5868	0.04041		34.4488	0.03209		44.2748	0.02924
55.8926	0.07996		44.9106	0.03924		44.8528	0.09539		40.1132	0.03782		58.089	0.03949		81.7292	0.02924		73.4638	0.08704		66.2388	0.06058		59.5918	0.07007		61.2102	0.03933		61.3836	0.07674		51.9292	0.04874		46.4134	0.03716		40.1132	0.03588		41.4426	0.0461		42.772	0.03687		41.9628	0.03627
44.7372	0.06785		53.6384	0.07023		38.6104	0.03219		62.5396	0.04935		91.035	0.05338		65.6608	0.06373		67.3948	0.04599		61.0368	0.01945		67.7416	0.08921		53.3494	0.06651		87.6248	0.05336		49.1125	0.05341		47.107	0.0392		32.4836	0.03899		37.3388	0.02897		36.992	0.02876		41.7316	0.04002
55.2568	0.05076		67.6838	0.04683		38.437	0.03508		49.2456	0.05046		56.7018	0.04405		72.7702	0.03768		64.2736	0.02074		56.066	0.0772		45.951	0.06484		44.0436	0.04437		73.117	0.05045		38.5732	0.06548		46.4712	0.05421		41.4426	0.04427		45.4886	0.03172		37.1654	0.01708		47.9162	0.03923
56.5862	0.07074		56.5284	0.05345		44.795	0.02924		44.3326	0.03832		60.3432	0.03294		80.342	0.08738		61.7882	0.08047		65.2562	0.0685		66.8168	0.06642		53.2338	0.06146		72.9436	0.08357		49.0965	0.05084		48.4942	0.04394		38.0324	0.03648		54.1586	0.04971		49.3034	0.05381		36.6452	0.037
53.176	0.05598		37.2232	0.02788		45.8354	0.02799		46.7024	0.04015		60.2854	0.0342		78.7236	0.08593		64.0424	0.04539		67.7416	0.02017		74.562	0.11016		55.2568	0.05045		76.8162	0.04036		47.9308	0.06192		49.708	0.06119		49.3034	0.03935		40.0554	0.03787		50.8062	0.05684		53.8118	0.05789
53.1182	0.0749		44.217	0.04981		42.9454	0.01965		44.9684	0.03908		59.0138	0.03101		74.5042	0.05723		60.9212	0.02089		71.6142	0.03498		59.3606	0.04634		53.3494	0.03341		46.9914	0.02611		52.6882	0.05678		49.8236	0.04776		48.0896	0.04714		40.3444	0.04079		52.7136	0.04414		40.0554	0.03692
41.2692	0.0621		49.8814	0.05174		45.951	0.03614		43.7546	0.0507		66.0076	0.03661		92.9424	0.05085		64.9672	0.02159		68.0884	0.06277		60.5744	0.0661		72.8858	0.03071		54.2164	0.04666		48.4782	0.06776		49.5346	0.02604		47.3382	0.05735		39.2462	0.02258		42.7142	0.05968		38.6104	0.02013
46.529	0.06065		70.5738	0.05459		43.4078	0.03226		41.3848	0.04304		61.4414	0.02992		64.3892	0.041		82.7696	0.03062		64.6204	0.09613		53.754	0.04915		59.7074	0.06558		57.5688	0.08255		60.7533	0.05397		44.217	0.06429		42.8298	0.05437		49.0722	0.03397		47.6272	0.03111		52.598	0.03367
48.2052	0.07232		50.575	0.04642		45.8354	0.0276		45.1996	0.03478		63.9268	0.04162		87.856	0.10887		62.7708	0.05906		74.9666	0.03782		74.851	0.06341		50.1704	0.04621		59.5918	0.08264		40.8298	0.05324		48.4364	0.07502		45.8354	0.03796		45.662	0.02399		43.061	0.04841		42.5986	0.03268
49.13	0.07356		41.038	0.04211		42.0784	0.01974		45.7198	0.0248		50.6906	0.03795		72.0188	0.06572		75.9492	0.0428		51.3264	0.03707		61.7882	0.05463		58.4358	0.06265		53.3494	0.04354		48.3539	0.06211		49.7658	0.0614		43.1188	0.04848		49.5346	0.05489		43.8124	0.04655		49.7658	0.04424
61.7304	0.07469		43.6968	0.03848		47.4538	0.03022		51.4998	0.04658		51.7888	0.02864		59.5918	0.04475		72.1922	0.02849		63.5222	0.03228		56.8752	0.09331		56.1816	0.0579		72.9436	0.04264		47.483	0.03761		45.4886	0.05013		40.8068	0.03799		41.905	0.04511		49.997	0.05777		52.1356	0.03823
61.9616	0.07904		69.2444	0.0615		35.9516	0.03745		40.2866	0.03892		63.58	0.03461		70.4582	0.0707		51.0952	0.01575		66.1232	0.03172		56.5284	0.04957		60.979	0.05803		85.8908	0.03578		46.6087	0.0479		49.6502	0.05935		41.8472	0.04828		41.2114	0.03037		41.1536	0.0356		47.6272	0.05727
68.204	0.05738		66.3544	0.06512		54.3898	0.016		47.8006	0.03581		78.0878	0.04835		85.1394	0.06272		66.47	0.02988		72.0188	0.03471		66.5278	0.06722		53.5806	0.04978		52.02	0.08065		46.4927	0.05304		48.7832	0.05077		51.6154	0.05373		41.4426	0.04383		41.0958	0.04076		44.3904	0.05492
56.2972	0.06152		60.0542	0.04503		54.8522	0.02397		49.0144	0.08137		61.6148	0.02977		61.7882	0.04534		70.5738	0.06741		57.4532	0.02225		55.1412	0.07546		53.6384	0.04384		56.7596	0.03344		47.4012	0.04906		48.7832	0.05401		45.373	0.05601		50.6328	0.03818		53.8696	0.07333		42.6564	0.03313
59.8808	0.07456		62.3084	0.03599		32.1368	0.01717		48.841	0.03377		69.4756	0.03876		65.6608	0.0433		66.5856	0.04697		50.4016	0.04433		62.8864	0.08971		57.1642	0.03729		57.4532	0.05192		44.4486	0.04378		55.6036	0.06048		49.8814	0.04484		48.0318	0.03387		47.974	0.04218		49.708	0.06402
49.9392	0.08221		47.1648	0.04558		43.9858	0.0203		51.9044	0.06107		58.5514	0.02689		64.447	0.0683		72.4234	0.05122		74.1574	0.04073		63.9846	0.05042		53.176	0.06907		45.373	0.03825		47.8714	0.04922		58.8404	0.05984		45.1418	0.05045		42.3096	0.03305		52.1356	0.04925		51.0952	0.04196
42.7142	0.0407		44.4482	0.0369		47.107	0.03748		42.8876	0.03695		63.5222	0.03552		58.8982	0.04375		66.5278	0.06588		62.2506	0.04212		67.048	0.12644		57.9734	0.04103		90.2258	0.0532		44.5714	0.03935		50.3438	0.03929		40.2288	0.03528		49.9392	0.03853		48.841	0.05268		41.0958	0.03728
53.2916	0.08107		52.02	0.06291		44.9106	0.02049		42.9454	0.04188		52.9448	0.03191		77.6832	0.06541		59.5918	0.04538		62.135	0.03495		65.7764	0.071		54.2164	0.04295		56.355	0.0523		43.8386	0.04713		52.309	0.06642		43.8702	0.0332		35.9516	0.03514		39.8242	0.06602		44.1014	0.05303
47.974	0.07087		46.1244	0.04278		41.6738	0.01683		47.2804	0.04619		66.7012	0.03881		63.869	0.05406		68.7242	0.04469		79.2438	0.05981		59.534	0.04665		50.9218	0.05357		80.9778	0.04044		49.709	0.04709		51.442	0.04456		42.3674	0.03163		41.5582	0.02712		39.593	0.03381		51.0952	0.04165
45.7776	0.05577		46.3556	0.02658		46.8758	0.02553		39.1884	0.04884		67.5104	0.04595		94.5608	0.08722		68.6664	0.02972		75.429	0.03216		53.9274	0.0556		58.8982	0.04239		70.805	0.03967		43.5386	0.04711		47.974	0.06189		44.6794	0.03914		47.7428	0.03171		49.2456	0.05157		45.1418	0.047
76.7584	0.05774		39.7664	0.03549		45.3152	0.02437		42.2518	0.03165		66.5278	0.06135		72.0766	0.10122		69.071	0.03935		65.892	0.04174		58.7826	0.07095		62.6552	0.07137		46.1822	0.03909		53.4626	0.05585		52.5402	0.06273		44.4482	0.04159		43.928	0.03645		42.8298	0.0404		40.8068	0.03641
50.575	0.07123		60.5166	0.05739		46.4134	0.02179		49.1878	0.05007		66.9324	0.04411		69.8224	0.04739		58.4358	0.04918		63.9846	0.03365		53.2338	0.05405		53.6384	0.04987		54.1586	0.04967		45.2109	0.05039		52.5402	0.08744		49.5346	0.04753		36.992	0.04718		43.6968	0.03603		44.1014	0.0246
60.5166	0.09151		71.7298	0.04858		46.0666	0.04295		35.1424	0.03189		50.1126	0.03647		61.3836	0.02628		63.9846	0.04198		63.2332	0.03816		55.7192	0.05274		67.3948	0.05797		74.9666	0.04659		37.094	0.04604		42.7142	0.05047		41.8472	0.0447		47.974	0.06707		46.2978	0.04212		43.2922	0.02883
50.3438	0.06954		44.217	0.0474		53.176	0.008		44.6216	0.04935		72.4234	0.03504		62.0772	0.05176		66.181	0.04252		64.1002	0.05281		57.3954	0.05657		54.5632	0.04926		61.3836	0.05162		51.2548	0.05498		46.2978	0.06156		42.4252	0.03162		41.5004	0.04526		43.7546	0.03534		37.6856	0.03544
49.4768	0.04474		46.4134	0.04829		34.5644	0.02979		50.0548	0.05037		56.7018	0.04716		76.6428	0.04882		55.9504	0.03054		64.3892	0.04232		54.2742	0.06997		63.1176	0.05473		55.1412	0.06534		52.573	0.05206		49.419	0.05481		48.7254	0.03819		48.4364	0.02901		42.1362	0.03474		37.281	0.02366
59.7074	0.06617		65.025	0.05647		51.9044	0.01599		46.818	0.0453		62.2506	0.06352		78.7236	0.03735		67.1636	0.04625		65.603	0.03729		48.1474	0.06356		56.355	0.05192		56.0082	0.04909		46.7381	0.05299		52.6558	0.06291		42.772	0.03286		53.754	0.04926		43.0032	0.04356		43.5812	0.03649
53.176	0.08642		48.841	0.02281		53.754	0.04775		45.4308	0.05666		59.6496	0.05133		61.4414	0.03016		56.933	0.0285		71.2674	0.05611		54.1586	0.08296		59.3606	0.06867		63.1754	0.05865		50.6727	0.05238		44.4482	0.03812		48.841	0.04334		47.2226	0.05284		40.749	0.04238		46.0666	0.03673
47.1648	0.07148		65.892	0.04575		43.8702	0.02293		66.0654	0.04441		64.3892	0.03966		77.7988	0.04085		76.9896	0.04737		63.0598	0.03276		58.8982	0.08834		66.6434	0.02998		57.9734	0.03867		48.5027	0.05625		45.5464	0.05709		40.9802	0.05992		41.905	0.03765		44.9106	0.03936		48.552	0.03914
47.396	0.05801		49.7658	0.03413		57.9156	0.0287		46.529	0.03296		92.9424	0.05405		90.6882	0.04495		61.0368	0.04177		63.869	0.031		54.332	0.06193		53.176	0.04157		60.5744	0.04899		50.1994	0.04917		54.5054	0.05489		41.6738	0.03817		39.9976	0.02717		48.4942	0.04366		48.552	0.03914
89.301	0.07134		41.0958	0.03076		38.2058	0.04083		41.1536	0.02205		76.6428	0.04549		86.411	0.04702		80.2842	0.03601		49.8814	0.03792		54.5054	0.06946		57.9156	0.05028		59.1872	0.03369		49.8246	0.07253		49.8236	0.05297		50.4594	0.03464		45.951	0.03653		47.8006	0.05442		49.7658	0.08013
75.6602	0.08625		70.1692	0.04589		36.8764	0.01821		52.598	0.05057		61.846	0.04772		63.002	0.04429		83.9834	0.03095		84.5614	0.03625		60.7478	0.03272		50.1126	0.05272		78.5502	0.05494		39.9089	0.03352		55.9504	0.04911		51.7888	0.0539		45.084	0.05299		44.4482	0.05633		42.0206	0.03529
60.112	0.09147		65.4874	0.03788		45.7198	0.0248		45.373	0.03729		94.9654	0.05181		58.4358	0.04769		55.8348	0.02219		72.7124	0.06019		47.396	0.07381		55.8926	0.04992		72.7124	0.05132		36.8903	0.04269		45.4886	0.057		51.731	0.05541		36.703	0.03181		39.5352	0.04393		36.8764	0.03993
59.8808	0.04872		59.5918	0.0419		42.772	0.02481		62.6552	0.04811		76.5272	0.0427		66.759	0.03088		62.9442	0.02828		60.2854	0.03411		56.2394	0.06832		55.1412	0.04765		52.0778	0.06865		53.3971	0.06355		51.3264	0.0531		41.1536	0.04076		40.1132	0.04999		40.8068	0.04811		43.6968	0.0335
58.7248	0.07496		54.5632	0.04643		45.3152	0.0227		41.2114	0.03501		66.8168	0.05237		71.2096	0.04728		63.5222	0.05714		63.9846	0.02878		49.6502	0.05781		55.3146	0.04823		59.534	0.05112		47.0455	0.05455		54.5054	0.04503		41.7316	0.03587		50.4016	0.04435		37.7434	0.03331		49.3612	0.03547
54.332	0.06894		66.8168	0.05965		44.5638	0.03601		44.9684	0.03821		91.2084	0.03866		71.0362	0.04711		57.5688	0.03902		71.4408	0.04419		64.3892	0.05899		57.4532	0.04221		47.107	0.04129		45.2387	0.06003		48.2052	0.04944		43.2344	0.04525		47.8584	0.04754		46.0666	0.04295		34.391	0.03353
42.3096	0.06978		40.749	0.0398		45.3152	0.02326		48.4364	0.06017		65.1984	0.03766		68.2618	0.0309		72.1922	0.03089		67.7994	0.03756		60.8634	0.05824		69.9958	0.04136		54.7944	0.03751		50.9831	0.06433		47.974	0.05344		47.7428	0.04541		46.7602	0.03324		39.7086	0.04871		45.8932	0.04391
46.2978	0.06479		43.4078	0.05654		30.345	0.03512		44.217	0.0496		59.245	0.04569		70.0536	0.08739		75.4868	0.04293		60.8056	0.03569		58.8982	0.06265		62.5396	0.03538		82.0182	0.06363		48.4459	0.05048		52.4824	0.05417		42.9454	0.05398		45.7198	0.03476		47.2804	0.05996		40.1132	0.03775
51.9044	0.05594		49.13	0.06121		45.7776	0.01518		47.4538	0.03201		57.4532	0.03287		73.117	0.04808		65.7186	0.04078		79.0126	0.04707		56.2972	0.06941		55.4302	0.04647		64.1002	0.05804		40.1856	0.04614		51.153	0.06286		54.9678	0.05107		42.1362	0.03985		54.2742	0.05268		51.5576	0.04683
46.0088	0.04769		39.9976	0.02742		45.1996	0.0271		68.1462	0.04996		55.3146	0.03262		92.5956	0.07101		67.8572	0.03154		78.7236	0.05649		46.3556	0.05673		53.754	0.02242		66.0076	0.0374		46.3063	0.03794		51.2108	0.05857		37.1654	0.02667		51.731	0.0395		33.1772	0.02316		40.9802	0.05296
50.575	0.06729		41.327	0.03876		48.6676	0.02922		44.6216	0.03724		90.8038	0.06824		73.4638	0.04181		61.6148	0.03186		68.2618	0.05677		61.9038	0.06804		71.2096	0.05409		53.0604	0.05466		47.7673	0.0493		42.8298	0.04558		43.639	0.05151		50.7484	0.04233		40.5178	0.04433		43.8124	0.02545
47.9162	0.07535		49.13	0.04276		40.8068	0.04039		47.7428	0.03337		67.7994	0.03672		73.8106	0.0466		53.5228	0.03629		76.9318	0.05184		53.9274	0.04655		67.7994	0.06188		63.0598	0.02539		46.4854	0.05344		47.1648	0.05913		41.2692	0.03747		56.5284	0.04881		51.6732	0.04503		49.13	0.03612
55.3146	0.07783		52.1934	0.0435		42.5986	0.04121		45.7198	0.03679		58.6092	0.04356		90.2258	0.04427		65.9498	0.03354		78.6658	0.04748		63.0598	0.09743		65.0828	0.04246		57.1064	0.06144		46.8763	0.04815		39.7086	0.04093		41.5582	0.03126		52.02	0.03781		46.6446	0.05058		44.4482	0.0324
81.9604	0.08281		40.5756	0.04276		32.4836	0.02375		47.107	0.05209		61.1524	0.04227		95.081	0.05864		46.5868	0.02322		59.7074	0.02505		48.1474	0.05134		55.9504	0.05643		63.9268	0.04958		52.3175	0.06122		49.9392	0.0427		52.887	0.03164		39.9976	0.04315		45.5464	0.0821		41.616	0.04255
52.598	0.08115		49.6502	0.07289		51.3264	0.02364		48.9566	0.04178		68.3196	0.04488		63.0598	0.14901		58.378	0.03156		56.5862	0.02886		69.8224	0.08742		89.7056	0.05965		55.199	0.03671		51.5031	0.05585		57.4532	0.0718		46.7602	0.04338		46.818	0.04186		45.1418	0.03708		47.7428	0.04084
52.4824	0.08108		48.7832	0.03607		36.9342	0.03558		39.2462	0.03163		65.025	0.05159		89.3588	0.05328		80.7466	0.02658		57.3954	0.02739		52.4246	0.04349		59.0138	0.04967		49.9392	0.04424		38.2343	0.04399		52.3668	0.05026		44.8528	0.04904		42.194	0.03771		38.148	0.03512		45.662	0.03244
54.332	0.0536		48.3786	0.04107		41.6738	0.01756		62.3084	0.05731		65.5452	0.04848		76.585	0.03516		56.8752	0.02469		67.048	0.04759		56.8752	0.07576		54.4476	0.02503		61.9616	0.10539		44.8487	0.0412		44.4482	0.03753		51.3264	0.04159		46.1822	0.04328		41.2692	0.03834		47.396	0.03589
50.6328	0.06959		39.9976	0.04538		46.2978	0.01863		62.2506	0.05686		97.0462	0.0564		64.7938	0.03118		91.035	0.05378		69.36	0.04039		43.35	0.04045		85.544	0.04472		61.3258	0.04415		45.8553	0.055		53.3494	0.07666		39.882	0.0224		47.2804	0.03619		48.4364	0.04022		40.5756	0.02792
45.8932	0.06392		44.5638	0.05827		55.3146	0.01938		38.5526	0.04297		65.6608	0.03232		84.8504	0.04668		69.3022	0.03986		67.8572	0.02702		53.9852	0.05625		68.7242	0.04372		62.2506	0.07035		56.2511	0.05922		56.2972	0.0539		46.529	0.05703		42.0206	0.04101		40.8068	0.03826		37.57	0.02112
47.9162	0.07002		47.8006	0.04181		45.7198	0.02494		37.859	0.02951		69.2444	0.04129		85.1394	0.04393		61.7882	0.02676		63.3488	0.03655		59.6496	0.05694		50.6328	0.06012		53.8696	0.0444		55.3294	0.07143		41.5582	0.03626		49.997	0.04199		44.7372	0.03353		34.0442	0.03087		41.616	0.02993
52.02	0.07783		58.0312	0.05206		34.4488	0.0223		42.2518	0.04578		60.7478	0.04707		57.1064	0.05897		78.9548	0.03247		62.5396	0.04259		64.8516	0.09902		45.2574	0.05394		51.6154	0.02911		51.6204	0.04451		42.483	0.06657		50.6328	0.03493		48.4942	0.04374		45.0262	0.03693		44.6216	0.06969
41.5004	0.05404		43.2922	0.07717		45.8354	0.02759		76.9318	0.04802		83.0008	0.0534		65.6608	0.02936		61.6148	0.02821		55.4302	0.03228		59.0716	0.05827		54.1586	0.04572		61.3258	0.03171		42.2355	0.05742		42.2518	0.05167		45.1996	0.03641		44.2748	0.02861		40.6912	0.05438		46.7024	0.03395
68.6664	0.0894		54.2742	0.03753		38.6104	0.02123		39.882	0.03001		54.621	0.03692		64.5048	0.03714		74.562	0.03767		71.9032	0.04859		62.7708	0.05779		56.0082	0.06887		65.1984	0.06324		45.7883	0.05665		46.6446	0.0811		41.5582	0.04189		47.2226	0.03941		38.726	0.03062		40.6334	0.03464
57.8	0.07773		46.7602	0.06763		40.8646	0.03512		50.4594	0.05145		72.0766	0.04251		63.5222	0.07478		59.5918	0.04414		59.534	0.02592		60.2276	0.06425		52.9448	0.06035		49.5346	0.02345		50.4322	0.05116		47.2226	0.04361		44.4482	0.03463		40.5756	0.03906		36.703	0.02973		50.6328	0.04256
42.0206	0.04335		44.6794	0.03896		39.9398	0.02523		43.8702	0.04829		77.0474	0.05298		64.736	0.06208		67.3948	0.03757		66.6434	0.04348		62.0772	0.06119		55.488	0.03177		61.2102	0.04217		45.1558	0.04523		42.2518	0.04101		52.5402	0.05886		43.9858	0.02798		44.0436	0.03906		36.2984	0.01756
51.3264	0.05756		61.7882	0.05265		44.1592	0.01946		41.7316	0.03622		63.5222	0.03927		83.232	0.06445		68.6664	0.02653		59.5918	0.0396		69.649	0.07479		51.442	0.03247		63.9268	0.03821		42.1055	0.04692		41.5582	0.04685		42.5408	0.0427		60.5166	0.04887		41.038	0.03985		50.9218	0.06717
53.2916	0.06613		53.5228	0.04862		50.8062	0.02593		58.378	0.04683		68.8398	0.02922		52.0778	0.05003		70.0536	0.0346		62.4818	0.04215		63.9268	0.06331		55.0256	0.06186		62.713	0.07322		49.2356	0.06431		41.616	0.05116		44.5638	0.03201		43.6968	0.04242		45.6042	0.05261		49.8236	0.05308
51.153	0.07049		53.9852	0.05847		37.9746	0.02122		50.9796	0.0382		90.2258	0.05284		77.1052	0.09943		70.7472	0.07733		66.759	0.03022		62.5974	0.07225		55.0256	0.05453		58.4936	0.04529		44.1326	0.05847		51.2108	0.05631		49.13	0.03677		56.2394	0.05717		45.662	0.05127		41.7316	0.02938
55.488	0.09543		67.337	0.09861		33.9864	0.02302		64.9672	0.0596		65.314	0.03207		87.856	0.0599		60.112	0.03249		61.268	0.02648		57.222	0.08318		60.8056	0.06262		63.0598	0.05238		41.9086	0.03819		49.8814	0.0531		49.6502	0.05015		54.3898	0.05303		50.7484	0.03956		39.5352	0.03501
67.9728	0.08078		48.2052	0.04544		50.7484	0.0444		36.7608	0.03309		66.181	0.04685		80.8044	0.04957		58.7248	0.04326		66.759	0.0462		59.7652	0.05553		61.4992	0.05995		51.0952	0.0505		48.0425	0.05202		40.9224	0.06148		45.4308	0.03789		45.8354	0.03911		46.1822	0.05192		48.552	0.03585
56.1238	0.08535		55.3146	0.02628		49.9392	0.04688		37.3388	0.04476		58.089	0.05701		93.9828	0.05976		81.2668	0.06925		57.6844	0.02411		52.5402	0.05112		83.0586	0.0434		63.9268	0.05558		50.2961	0.06743		41.2692	0.04529		46.4134	0.04369		35.9516	0.01911		37.859	0.02402		38.6682	0.04599
52.8292	0.06358		51.2108	0.03576		34.2754	0.03864		37.1076	0.03514		49.5924	0.02382		64.7938	0.0587		70.6894	0.03507		63.1176	0.03711		64.3892	0.09914		75.2556	0.06501		54.6788	0.04557		46.6615	0.0617		48.2052	0.06583		48.1474	0.04513		42.0206	0.04204		44.6216	0.03479		39.1306	0.0304
41.9628	0.0629		54.043	0.04216		37.3388	0.02651		52.7136	0.04701		59.8808	0.03815		53.9274	0.03129		65.6608	0.02914		67.2792	0.05901		54.91	0.05387		66.7012	0.05255		71.6142	0.04033		51.4826	0.07909		53.2916	0.04921		39.304	0.03272		39.6508	0.04912		41.4426	0.03443		45.4886	0.02614
50.8062	0.0572		46.9336	0.04728		54.5054	0.03157		69.2444	0.05451		58.956	0.04305		72.1344	0.07971		75.7758	0.03678		87.0468	0.04165		53.6962	0.04726		62.135	0.08107		60.7478	0.04709		47.6556	0.06536		45.2574	0.0566		42.8298	0.03101		39.2462	0.03251		46.9336	0.03873		41.7894	0.02474
90.5148	0.07643		50.9796	0.04847		51.442	0.03218		44.4482	0.05362		57.6844	0.02433		80.5154	0.04966		55.3146	0.02231		70.7472	0.02956		54.7944	0.06991		57.3376	0.05682		57.8578	0.02975		41.7972	0.07231		58.089	0.06855		50.575	0.03846		41.616	0.05265		42.5408	0.03899		42.8298	0.03142
51.2108	0.07615		38.5526	0.03105		37.7434	0.05243		43.5234	0.0435		66.9324	0.04596		63.002	0.08862		73.984	0.02708		77.0474	0.04084		59.6496	0.0671		52.3668	0.035		58.1468	0.03666		48.9693	0.04869		51.731	0.06138		41.3848	0.03643		54.5054	0.05535		41.2114	0.03259		45.8354	0.0374
61.0946	0.07483		55.7192	0.04429		53.9274	0.01461		37.8012	0.03339		54.621	0.03176		75.7758	0.03536		63.002	0.02045		57.6844	0.03741		52.1934	0.03489		44.6216	0.02855		59.245	0.05349		47.6801	0.04596		45.5464	0.06977		42.8298	0.03011		52.4246	0.04138		41.7894	0.03341		53.6962	0.04108
54.7366	0.08445		53.5228	0.05658		43.9858	0.03474		48.7832	0.03143		72.5968	0.04834		69.5912	0.03918		89.6478	0.04376		62.7708	0.02272		72.1922	0.08084		52.598	0.03188		55.7192	0.03478		47.255	0.04873		51.731	0.06876		43.7546	0.029		46.0666	0.04294		42.7142	0.04241		37.3966	0.04454
73.984	0.06029		40.9802	0.03712		50.864	0.04919		42.194	0.03865		67.337	0.02928		65.5452	0.05595		80.5732	0.05688		75.6024	0.04257		58.378	0.06725		55.8926	0.07186		52.1934	0.05958		47.7929	0.0446		50.2282	0.07826		42.7142	0.04876		45.4308	0.04309		44.8528	0.04357		46.1822	0.04439
45.7198	0.07464		43.2344	0.02693		34.68	0.02749		54.043	0.04764		56.5284	0.0321		58.7248	0.03677		64.6204	0.05119		75.718	0.04343		53.465	0.06062		54.5054	0.03668		58.4936	0.11143		42.7808	0.04951		50.1126	0.05723		49.0144	0.03937		49.6502	0.05615		39.4774	0.03032		41.9628	0.04013
57.222	0.07846		40.2866	0.0505		48.7254	0.03025		33.9286	0.03083		49.6502	0.0276		57.6844	0.04157		63.1176	0.04564		93.636	0.05271		59.8808	0.04736		64.5626	0.04982		51.8466	0.04074		51.1677	0.06013		52.598	0.06951		46.24	0.03975		40.749	0.03909		40.8068	0.03839		46.2978	0.04036
48.7832	0.07509		59.6496	0.05657		47.3382	0.0251		45.0262	0.044		85.6018	0.04937		63.7534	0.03843		59.1294	0.01416		57.5688	0.0263		66.6434	0.05818		59.9386	0.04803		54.8522	0.0617		46.2036	0.05012		50.1126	0.03756		48.3786	0.04257		52.887	0.04849		38.9572	0.04164		43.8124	0.05209
48.0896	0.0608		51.731	0.07997		46.529	0.05239		67.5682	0.03195		90.2836	0.0422		76.6428	0.04467		59.3028	0.02425		64.736	0.02616		69.938	0.11552		60.9212	0.0295		56.2972	0.06272		50.7176	0.05236		48.4942	0.08208		50.9218	0.04905		48.0318	0.04158		40.1132	0.02627		57.222	0.03469
55.0834	0.05816		41.2114	0.04309		49.5346	0.01588		38.0902	0.03208		55.7192	0.04755		73.0014	0.04569		71.5564	0.04644		64.0424	0.02588		58.6092	0.06576		51.3264	0.04653		57.7422	0.03222		53.3635	0.05867		54.2164	0.05817		39.8242	0.07243		47.1648	0.04427		41.616	0.03162		45.662	0.03651
73.0014	0.07219		56.2972	0.03979		49.0144	0.04775		46.529	0.04403		69.36	0.02931		55.4302	0.01945		62.0772	0.03707		63.002	0.03887		66.9324	0.06333		62.5974	0.04059		53.9852	0.02702		50.642	0.05112		48.3786	0.04746		37.1076	0.02961		37.2232	0.04332		39.3618	0.04015		41.327	0.0562
56.8174	0.08758		61.2102	0.06241		41.327	0.02374		48.3208	0.03591		63.8112	0.03299		107.913	0.06422		71.7876	0.04321		61.1524	0.04182		53.0604	0.07701		63.1176	0.04698		64.7938	0.05303		44.0634	0.06011		48.552	0.04871		44.3326	0.03804		47.396	0.03847		40.5178	0.04202		41.905	0.03825
55.6614	0.05482		41.3848	0.04468		36.2984	0.0588		45.5464	0.05114		74.3308	0.06067		78.0878	0.04559		58.3202	0.02779		79.186	0.06695		57.511	0.05293		58.2624	0.05129		54.043	0.05437		49.4902	0.05626		51.731	0.07858		44.6216	0.04572		50.8062	0.03801		50.6328	0.03978		33.6974	0.0396
66.5278	0.04954		54.4476	0.03701		52.598	0.03175		63.58	0.06694		63.9268	0.03417		68.0884	0.08757		63.2332	0.02281		62.9442	0.03451		58.1468	0.05868		55.3724	0.03738		45.1418	0.04252		43.0953	0.07514		56.066	0.05971		48.2052	0.0629		48.4364	0.04766		43.4656	0.04774		48.0896	0.03317
45.0262	0.04812		44.4482	0.06456		36.5296	0.03007		55.488	0.03872		58.8982	0.04493		80.5154	0.03738		86.122	0.07118		64.3314	0.05346		56.7596	0.05946		55.3724	0.04629		67.5104	0.02689		41.4166	0.05732		56.5284	0.0705		47.107	0.04715		42.3096	0.04233		45.0262	0.04062		39.593	0.03889
50.9218	0.08148		60.4588	0.04773		38.2058	0.01759		59.9386	0.05454		61.846	0.03578		70.9784	0.07062		65.892	0.02358		70.4582	0.04641		57.2798	0.06953		54.1008	0.05357		48.8988	0.04051		46.7693	0.05795		49.8236	0.06522		55.0834	0.03643		39.882	0.03076		47.5694	0.04587		39.8242	0.03768
60.0542	0.06073		47.8006	0.04958		50.4594	0.03192		55.3146	0.04567		83.6944	0.04012		57.6266	0.04437		62.0194	0.03909		59.245	0.0219		52.4246	0.05837		75.718	0.04541		66.1232	0.03547		57.2336	0.04071		56.5284	0.0705		46.5868	0.04201		48.3786	0.04389		41.4426	0.02755		51.3842	0.03951
48.1474	0.07885		50.1126	0.06577		47.5694	0.06629		52.7136	0.0466		66.181	0.03402		71.7876	0.05527		55.0834	0.0321		69.8224	0.02401		67.2792	0.08183		55.488	0.06043		59.0716	0.03199		52.9481	0.04748		49.8236	0.06522		44.8528	0.03599		48.3208	0.0429		51.731	0.03745		41.9628	0.02198
52.2512	0.0823		66.5856	0.05691		44.6794	0.02226		39.1306	0.04363		54.2742	0.04162		74.4464	0.04997		74.0418	0.04287		61.557	0.0219		49.2456	0.03492		42.483	0.04278		54.5054	0.04282		48.1527	0.06613		46.9914	0.03914		49.4768	0.05358		49.7658	0.04207		37.6278	0.034		49.13	0.03812
48.4364	0.06283		58.1468	0.05795		45.1996	0.01884		44.5638	0.03221		56.2972	0.0502		62.9442	0.04435		75.1978	0.03803		65.3718	0.02981		53.2916	0.06732		56.7018	0.05114		86.7578	0.06356		47.0669	0.04596		57.222	0.03956		39.5352	0.02344		44.506	0.04092		47.9162	0.0578		40.3444	0.05078
59.7074	0.06793		49.4768	0.04784		46.1244	0.03213		45.2574	0.04904		70.1114	0.0426		92.5956	0.06803		54.2164	0.01997		66.2966	0.04892		59.534	0.04534		71.0362	0.05152		61.1524	0.04889		44.8537	0.07147		50.6328	0.07264		44.7372	0.04173		39.5352	0.06883		38.4948	0.05526		47.1648	0.04258
68.7242	0.07166		56.9908	0.05086		33.7552	0.02512		37.859	0.04278		64.8516	0.04473		59.245	0.0255		67.4526	0.03364		62.713	0.03558		67.3948	0.07801		62.135	0.08707		61.0368	0.06306		44.3428	0.04732		54.621	0.04963		40.6912	0.03556		45.373	0.05334		38.6104	0.02331		34.391	0.03347
51.3264	0.07083		54.5632	0.04031		34.4488	0.0371		44.7372	0.04938		53.9852	0.03853		57.5688	0.04711		76.585	0.02135		71.9032	0.04244		65.7764	0.06321		44.7372	0.05292		67.7994	0.05388		48.7938	0.06218		46.4712	0.066		49.708	0.05365		50.2282	0.05201		42.9454	0.03306		44.6794	0.0343
46.9336	0.07494		47.5694	0.03502		49.8236	0.02365		50.0548	0.02629		66.47	0.0363		81.6136	0.05299		50.1704	0.02703		55.0834	0.03526		60.6322	0.07598		51.8466	0.05036		51.5576	0.0557		44.5286	0.05609		50.8062	0.04971		45.3152	0.03877		51.3264	0.04409		40.171	0.04335		38.726	0.02597
87.1046	0.05806		43.5234	0.03103		48.3786	0.01987		52.887	0.03384		70.4004	0.04519		66.181	0.04697		77.452	0.03332		64.9672	0.03398		57.7422	0.06845		53.2916	0.04748		48.0896	0.04113		47.6304	0.0401		46.2978	0.04239		40.9224	0.04147		45.373	0.03082		50.575	0.05248		43.639	0.03457
63.4644	0.07583		75.2556	0.049		45.7776	0.05325		44.5638	0.04086		53.176	0.02361		90.746	0.04684		73.6372	0.02716		73.4638	0.0394		69.5334	0.07439		46.529	0.08418		61.2102	0.03507		45.2633	0.04103		43.35	0.04862		46.6446	0.04038		36.414	0.03052		38.0324	0.04294		42.8876	0.04199
58.667	0.10567		64.9094	0.05278		49.3034	0.03327		44.0436	0.0498		73.5794	0.04235		89.8212	0.07738		96.8728	0.06056		56.5284	0.04535		45.084	0.0315		67.1058	0.04616		58.4936	0.03979		60.6908	0.06547		54.8522	0.06057		54.8522	0.04021		46.9914	0.03705		34.5644	0.02744		40.5178	0.04755
67.4526	0.0742		64.6204	0.04464		52.1356	0.04483		42.8876	0.04248		85.7174	0.04869		68.204	0.06823		54.1586	0.03785		58.1468	0.02225		46.529	0.05237		52.4246	0.036		72.1922	0.05341		57.5857	0.07179		47.1648	0.062		46.4712	0.04183		40.8068	0.03579		39.304	0.04563		49.0144	0.03508
51.0952	0.05933		58.0312	0.03094		45.5464	0.03267		43.061	0.04176		49.0144	0.03148		60.9212	0.02517		64.447	0.03185		60.9212	0.03026		52.8292	0.05951		55.0256	0.03692		63.3488	0.04944		44.743	0.0986		51.9622	0.05845		42.194	0.04461		38.3792	0.03203		42.5986	0.04414		39.9976	0.02808
55.0834	0.07519		52.3668	0.04788		38.8416	0.02129		54.1586	0.05878		68.3196	0.03327		52.0778	0.03632		61.0368	0.01828		57.6266	0.03326		53.8696	0.06435		56.0082	0.04941		69.7646	0.04141		43.6987	0.05192		48.0896	0.0483		43.35	0.04073		45.1418	0.0379		38.2636	0.04238		40.4022	0.03373
44.9684	0.06562		51.153	0.0551		46.24	0.02519		44.7372	0.04759		76.1226	0.04822		76.585	0.05106		58.8982	0.06607		64.736	0.0221		53.1182	0.07651		59.0138	0.04009		60.0542	0.03828		41.9089	0.05761		44.1592	0.05552		40.1132	0.0381		39.2462	0.04118		45.084	0.03553		42.483	0.04024
54.2742	0.07226		48.8988	0.03988		43.928	0.01702		45.951	0.04571		76.7584	0.04944		66.5856	0.0478		56.7018	0.02867		68.7242	0.03346		49.708	0.04694		55.777	0.06867		72.1922	0.03142		50.1394	0.0553		47.2226	0.06788		45.3152	0.06659		43.4656	0.04248		43.9858	0.04279		47.0492	0.04013
52.598	0.04599		79.0704	0.05807		50.9796	0.04387		51.8466	0.0437		111.149	0.03896		78.897	0.08882		57.222	0.01939		62.9442	0.03622		46.0088	0.05632		52.3668	0.02993		54.91	0.03603		56.8396	0.05627		47.3382	0.06695		44.1592	0.03729		43.928	0.03432		52.7714	0.05124		45.3152	0.05414
42.1362	0.06682		60.69	0.08823		40.5178	0.03632		46.4712	0.04806		65.892	0.04036		75.1978	0.04577		65.2562	0.02019		79.764	0.052		57.3376	0.04777		58.3202	0.06585		44.0436	0.03661		40.2229	0.05755		42.7142	0.05082		42.5408	0.04319		42.772	0.04118		39.3618	0.03961		49.6502	0.04348
48.552	0.06304		49.0722	0.02812		49.0722	0.04795		40.8646	0.03469		52.0778	0.0443		58.378	0.03074		72.7702	0.02643		71.7298	0.04911		49.7658	0.07305		54.7944	0.0764		70.6316	0.0643		41.1655	0.0489		41.6738	0.04199		43.8124	0.03197		49.4768	0.04315		47.2804	0.06541		42.9454	0.0437
46.0088	0.06296		50.9796	0.0473		49.0722	0.03847		44.3904	0.03586		74.0418	0.05982		78.4346	0.08584		61.3258	0.0261		61.7882	0.0295		53.8118	0.05824		61.0368	0.03832		59.8808	0.04274		44.6083	0.0547		42.7142	0.0525		32.7726	0.0203		44.3326	0.04794		40.5756	0.05022		52.4824	0.03443
49.8814	0.06363		45.3152	0.02473		51.6154	0.03291		44.795	0.0431		52.02	0.04072		72.8858	0.02789		55.9504	0.02672		54.5054	0.03985		57.3954	0.08056		71.672	0.07331		55.8348	0.03227		48.165	0.05752		45.7776	0.05169		46.8758	0.03349		42.1362	0.0322		51.3264	0.03054		49.3034	0.04554
61.846	0.10247		50.4594	0.0401		46.529	0.03302		55.3724	0.05645		60.401	0.03322		78.5502	0.05044		63.58	0.02717		57.7422	0.04721		63.1754	0.0918		78.897	0.04587		61.9038	0.05199		35.1139	0.03069		43.1188	0.06251		51.3264	0.05444		59.9964	0.05115		49.8814	0.04434		45.373	0.03318
67.2792	0.08769		52.887	0.06028		50.286	0.03043		51.3264	0.06543		78.319	0.02586		71.2096	0.04039		70.0536	0.05287		64.8516	0.02084		56.9908	0.04633		82.8274	0.04889		51.731	0.04116		39.0971	0.03971		54.1586	0.0467		39.7086	0.03454		41.8472	0.02889		52.3668	0.05225		42.5986	0.03373
43.2922	0.02118		51.2108	0.0411		38.148	0.03003		50.1704	0.05834		73.8684	0.03633		65.025	0.05774		83.0586	0.06063		62.135	0.01777		64.158	0.05398		65.3718	0.05857		56.7596	0.05748		53.3228	0.05746		53.0604	0.04632		46.8758	0.04179		51.6732	0.03947		42.5986	0.03271		39.882	0.04548
57.6844	0.03544		46.7024	0.03055		52.2512	0.02251		48.3208	0.05381		47.5116	0.04388		66.9324	0.04834		69.071	0.05531		61.3836	0.03996		56.066	0.0498		65.314	0.07065		67.1058	0.04446		42.1519	0.04611		36.703	0.04653		49.5924	0.03728		49.6502	0.07676		46.0088	0.03457		39.882	0.04548
56.644	0.082		80.631	0.03801		48.263	0.03802		63.6378	0.0444		56.0082	0.03958		75.7758	0.04937		54.5054	0.02442		75.4868	0.03495		64.3314	0.06751		56.9908	0.0412		50.1126	0.03614		44.1117	0.04545		49.8814	0.0644		46.24	0.05685		41.5582	0.02972		40.5178	0.02691		51.731	0.05194
45.7198	0.06241		56.5862	0.05481		45.951	0.01294		44.217	0.03971		67.3948	0.04241		69.0132	0.04594		60.8056	0.02691		75.2556	0.04124		60.3432	0.07179		65.025	0.07154		63.7534	0.05699		45.3626	0.05401		51.5576	0.05913		45.4886	0.03866		43.5234	0.03388		49.708	0.05307		52.1356	0.04154
56.644	0.08674		37.859	0.03213		47.8584	0.04759		38.7838	0.05031		68.204	0.03307		76.4694	0.06903		68.3196	0.04024		63.0598	0.02761		59.7074	0.06172		61.4992	0.05239		53.8696	0.03046		45.9331	0.03341		43.2344	0.04546		40.2288	0.0424		45.2574	0.03476		39.593	0.03967		42.483	0.03418
49.8814	0.05919		64.736	0.04753		44.795	0.02557		41.038	0.02215		68.204	0.04211		68.2618	0.06199		81.9604	0.0846		63.869	0.04941		52.1356	0.06163		51.0952	0.07553		65.2562	0.11094		34.9999	0.02681		46.6446	0.05686		50.286	0.0395		41.905	0.04232		46.0088	0.04289		48.552	0.06717
54.043	0.05997		77.3942	0.03416		52.0778	0.02825		41.327	0.0332		62.9442	0.03318		72.25	0.04013		68.6086	0.01671		66.1232	0.04343		56.7596	0.04653		59.4762	0.05694		52.4246	0.03542		39.1479	0.02098		48.9566	0.06931		50.864	0.04056		52.0778	0.05026		49.3612	0.03587		35.0268	0.01968
54.332	0.07795		40.8068	0.02362		39.4774	0.0267		51.6154	0.04209		58.1468	0.0435		71.383	0.0528		52.4824	0.04498		62.2506	0.03991		58.956	0.06034		69.1866	0.04895		82.0182	0.07977		49.2401	0.06761		41.616	0.06144		39.7086	0.03785		48.3208	0.03246		47.6272	0.04964		41.7316	0.04095
48.263	0.07847		59.8808	0.04919		52.4246	0.02616		40.9224	0.03921		68.9554	0.03233		73.695	0.0324		75.0244	0.03554		61.9616	0.02809		57.8	0.07858		59.4762	0.04427		73.8106	0.04303		48.4479	0.04912		48.3786	0.06257		41.327	0.04514		45.8354	0.03808		36.3562	0.02898		41.1536	0.04362
75.14	0.08018		61.3258	0.08653		52.2512	0.0437		55.3146	0.04551		65.0828	0.03598		74.9666	0.03988		63.3488	0.0406		80.2842	0.03975		60.5166	0.06892		55.1412	0.04964		43.1188	0.05514		50.567	0.05261		46.1244	0.03615		57.3376	0.04633		42.3096	0.06278		48.9566	0.03855		42.9454	0.0474
46.6446	0.06849		50.9796	0.02827		42.772	0.04353		46.818	0.05261		66.7012	0.04819		75.8914	0.02825		60.8056	0.02543		53.5228	0.03307		54.8522	0.06723		73.9262	0.05915		77.3942	0.024		52.0715	0.05224		47.4538	0.07743		42.2518	0.03012		46.6446	0.04172		50.286	0.0578		46.6446	0.04774
61.2102	0.06571		49.0722	0.0637		46.0088	0.02781		54.3898	0.06181		59.0716	0.04333		63.7534	0.03396		54.5632	0.02288		53.8696	0.02698		72.7702	0.05494		68.3774	0.0365		62.0194	0.03623		54.6266	0.05433		50.575	0.0421		39.0728	0.05102		40.749	0.03823		53.9274	0.07641		45.373	0.03846
47.6272	0.06728		49.13	0.05359		34.7956	0.03613		48.841	0.03246		56.0082	0.03921		70.9206	0.09093		70.4004	0.04986		57.8	0.02868		58.4358	0.06922		54.2164	0.04164		63.3488	0.08835		47.6202	0.04808		42.194	0.0427		39.3618	0.03473		50.1126	0.03268		44.8528	0.03462		38.4948	0.03286
58.956	0.08055		56.0082	0.0589		48.263	0.01993		48.841	0.04033		75.429	0.05793		72.539	0.05079		68.7242	0.05989		59.4184	0.03494		64.6782	0.07452		65.314	0.0465		59.0138	0.02908		45.1012	0.04835		47.3382	0.05944		46.2978	0.0334		46.2978	0.03673		47.8006	0.04162		47.8584	0.04464
58.5514	0.07531		48.4364	0.06038		52.4824	0.04799		50.1126	0.03805		71.3252	0.05693		74.851	0.04381		61.1524	0.02003		75.2556	0.03527		58.0312	0.06634		55.488	0.03271		63.8112	0.02308		47.2564	0.05539		57.3954	0.05572		40.0554	0.04026		44.0436	0.03831		42.9454	0.05422		49.7658	0.03103
58.378	0.0681		53.8696	0.05022		47.974	0.03919		60.6322	0.05727		70.6316	0.03635		75.0822	0.04801		71.6142	0.05132		68.4352	0.08628		56.644	0.06714		59.0138	0.0554		58.3202	0.05591		44.4446	0.05006		46.3556	0.06141		44.2748	0.03914		44.5638	0.03891		39.1884	0.04246		49.0722	0.03329
52.5402	0.05663		56.5284	0.0497		52.5402	0.04126		47.0492	0.06748		49.8236	0.03608		90.746	0.04966		76.9896	0.02802		58.4936	0.00836		43.0032	0.053		48.7254	0.06316		84.9082	0.07791		40.733	0.05108		46.7024	0.06126		51.8466	0.03932		40.0554	0.04795		40.8068	0.04435		47.8584	0.04155
41.616	0.07652		41.905	0.04339		46.0088	0.02955		37.9168	0.0355		66.1232	0.03601		93.2314	0.06694		72.1344	0.03969		57.3954	0.02678		51.153	0.06593		54.6788	0.05305		63.1754	0.073		46.4828	0.05339		43.0032	0.06399		42.4252	0.03194		41.327	0.02629		48.8988	0.04909		48.7254	0.03933
45.0262	0.05814		51.7888	0.0499		40.5756	0.0353		62.9442	0.03318		56.1238	0.03622		85.6596	0.07918		67.626	0.06585		75.5446	0.03893		67.9728	0.07645		59.9386	0.05455		85.4284	0.0811		37.7495	0.04005		46.24	0.06584		37.9746	0.02994		49.8236	0.04411		43.2344	0.02892		42.3674	0.03669
45.4308	0.08291		40.4022	0.02424		53.5806	0.02982		39.9976	0.03223		62.8864	0.02669		66.1232	0.05783		70.4004	0.01831		74.851	0.03688		55.2568	0.07607		55.488	0.0549		59.3028	0.09825		54.6469	0.06854		51.0374	0.05965		46.529	0.03708		42.5408	0.06274		51.0952	0.04007		40.9802	0.02909
52.7136	0.07456		43.9858	0.03413		47.5116	0.03594		54.2742	0.03904		61.6148	0.05049		105.485	0.04886		64.6782	0.01699		56.8752	0.02304		61.1524	0.05733		57.5688	0.03277		75.718	0.06422		43.6158	0.06283		49.5924	0.04641		47.8006	0.04345		54.1586	0.04614		44.6216	0.04057		42.483	0.03501
48.4942	0.07406		54.9678	0.02503		55.4302	0.02605		50.4016	0.04609		60.401	0.03104		76.874	0.0471		74.562	0.03461		61.9038	0.0485		50.8062	0.05162		68.7242	0.03532		65.3718	0.08068		41.6064	0.05333		48.6676	0.05793		43.9858	0.03723		40.171	0.03788		43.8702	0.04291		41.8472	0.0383
55.4302	0.07058		47.5694	0.04893		43.1766	0.01381		42.0784	0.02647		69.7646	0.03143		69.7646	0.11607		65.9498	0.02643		72.0766	0.04671		53.6962	0.07261		56.355	0.04438		64.2158	0.05462		49.321	0.0475		44.4482	0.05904		43.8702	0.03641		40.3444	0.02843		51.0374	0.04381		42.7142	0.03456
49.9392	0.08497		78.897	0.07757		41.616	0.04601		40.9802	0.02543		46.529	0.03952		97.4508	0.07417		54.2742	0.0377		83.4054	0.0416		54.91	0.07476		53.465	0.04612		47.5694	0.03623		43.609	0.04318		48.2052	0.04532		49.997	0.06568		46.1822	0.03976		52.5402	0.03281		38.8416	0.03123
50.9796	0.07722		47.396	0.02977		47.396	0.02597		46.7024	0.05636		55.9504	0.04904		73.9262	0.07078		74.0418	0.03931		68.4352	0.04416		64.6204	0.10023		53.5806	0.04579		48.552	0.05453		41.2358	0.05048		46.24	0.05712		47.9162	0.04472		45.7776	0.02592		37.6856	0.03023		53.1182	0.03939
56.7596	0.07264		43.35	0.01852		41.905	0.02267		42.6564	0.04015		73.2904	0.0638		60.112	0.04179		73.0014	0.03801		61.6148	0.02225		52.7714	0.06241		55.7192	0.04732		55.9504	0.03596		41.0979	0.04777		47.2226	0.05383		44.2748	0.0342		48.3786	0.03145		42.8298	0.04705		39.2462	0.02927
47.8584	0.0623		55.2568	0.05272		57.222	0.02309		53.2916	0.04368		70.7472	0.03768		58.378	0.05236		59.3606	0.05277		71.4408	0.04236		65.314	0.1049		56.8752	0.05813		61.268	0.04573		47.6358	0.05213		44.9684	0.03594		43.5234	0.02911		43.0032	0.04408		48.8988	0.05427		43.0032	0.04603
58.8404	0.08772		56.4128	0.04465		47.3382	0.03003		43.0032	0.03222		56.5862	0.02562		69.7646	0.0412		57.8	0.01483		62.8864	0.03438		55.199	0.05672		53.2338	0.06276		50.3438	0.05883		44.1035	0.07399		46.3556	0.06369		46.9914	0.03111		44.795	0.06467		46.3556	0.0532		53.1182	0.03836
50.864	0.05629		53.0604	0.04903		32.368	0.03902		50.9796	0.06171		52.6558	0.02957		77.5676	0.02912		70.8628	0.04272		62.8286	0.03939		51.0952	0.05304		63.9268	0.06205		54.91	0.04446		42.2045	0.03883		47.4538	0.06389		39.3618	0.02414		42.0784	0.04385		41.0958	0.03899		48.4942	0.04755
66.2966	0.0818		45.6042	0.034		40.171	0.01904		45.7776	0.05109		60.979	0.03669		82.1338	0.07666		55.0256	0.02372		70.3426	0.0715		53.2338	0.04796		56.355	0.02648		52.2512	0.03917		48.9798	0.05232		43.928	0.0491		41.3848	0.02608		46.3556	0.05433		30.923	0.04356		45.4886	0.05697
50.864	0.05122		47.9162	0.05181		41.8472	0.01954		53.0604	0.06853		60.5744	0.03425		71.0362	0.04444		61.9038	0.05802		52.9448	0.0279		70.3426	0.06259		65.4296	0.05249		58.667	0.04237		55.5612	0.04055		45.6042	0.06426		37.6278	0.03162		42.8876	0.04414		40.1132	0.02392		43.8702	0.04827
64.447	0.06415		56.644	0.05723		38.8994	0.02249		44.217	0.04827		47.5694	0.03024		62.5974	0.05479		58.2046	0.01798		66.181	0.03563		47.5694	0.04716		54.3898	0.03469		61.4992	0.02745		51.3481	0.04589		61.0368	0.07197		37.0498	0.02926		53.5228	0.04087		39.5352	0.03524		42.3674	0.03288
46.8758	0.06343		53.465	0.05108		47.974	0.03645		48.0896	0.04533		74.273	0.02901		69.5912	0.04004		63.4644	0.06337		81.9026	0.05438		48.6098	0.06393		54.9678	0.05299		72.1922	0.04616		50.3093	0.06576		52.8292	0.07209		42.772	0.04522		47.396	0.03353		42.7142	0.02392		47.685	0.03785
42.194	0.06471		63.3488	0.02879		52.887	0.02196		36.0094	0.03792		66.9324	0.03547		69.3022	0.05603		66.3544	0.03921		65.1406	0.04077		57.8	0.05374		54.1008	0.03408		52.6558	0.05455		42.9892	0.05767		52.3668	0.0625		40.3444	0.03343		49.0722	0.07075		41.6738	0.03474		47.2804	0.03654
54.332	0.09265		44.5638	0.03501		43.1188	0.02693		45.8354	0.05622		74.0996	0.05606		83.4632	0.06985		58.6092	0.0311		104.676	0.05307		61.4414	0.05773		52.1934	0.06466		49.9392	0.03372		45.0427	0.04834		51.5576	0.05349		45.3152	0.03698		51.0374	0.03563		49.5924	0.05241		49.4768	0.03731
42.772	0.06094		45.1418	0.03295		46.0088	0.02766		38.0902	0.04126		63.58	0.04376		81.3824	0.05843		73.2904	0.04044		62.7708	0.03928		63.4066	0.07922		50.575	0.05342		69.2444	0.05031		40.6296	0.05566		45.4308	0.07825		47.1648	0.04471		46.1822	0.05499		40.9802	0.0397		41.616	0.02626
63.58	0.0891		59.8808	0.05105		40.1132	0.01569		46.7602	0.03718		56.2394	0.03325		77.8566	0.04593		66.9324	0.05029		58.6092	0.04286		58.667	0.05905		53.9852	0.05307		75.7758	0.04356		48.9763	0.04674		50.1126	0.0603		37.3966	0.04203		48.1474	0.04708		49.0722	0.04599		40.5178	0.02889
55.1412	0.05993		41.5004	0.04357		36.3562	0.04978		42.8876	0.0427		56.2972	0.03949		68.3196	0.06105		58.1468	0.03011		56.5862	0.02799		55.8926	0.068		59.3606	0.04692		61.846	0.0634		42.5329	0.0531		38.8416	0.05112		41.6738	0.03424		47.107	0.03068		51.2108	0.05756		41.3848	0.0414
46.0666	0.05853		59.7652	0.05573		43.8124	0.02928		36.9342	0.03114		49.8814	0.04499		98.3756	0.04752		63.8112	0.02183		70.227	0.03361		64.0424	0.04978		77.0474	0.0632		62.4818	0.0552		48.6013	0.04737		49.0144	0.05142		38.437	0.03304		46.4134	0.05521		39.7664	0.03129		43.35	0.02501
62.5396	0.05189		50.1704	0.0552		43.0032	0.03191		47.1648	0.04071		63.8112	0.04483		87.5092	0.09484		66.0076	0.03402		63.869	0.02833		51.2108	0.0423		52.7714	0.0413		59.245	0.03374		48.4636	0.04727		41.3848	0.05183		38.3214	0.03171		51.4998	0.04345		39.1884	0.03225		52.309	0.0267
63.58	0.12239		56.5284	0.0563		36.414	0.03749		49.0144	0.04302		70.7472	0.04001		72.1344	0.0494		61.3836	0.02472		71.7876	0.03282		52.02	0.0713		52.3668	0.05307		78.6658	0.0772		43.3213	0.05594		41.9628	0.05601		48.0318	0.05058		47.8584	0.03916		42.5986	0.03153		40.9802	0.02961
64.9094	0.08746		71.4408	0.04224		38.4948	0.02257		40.6912	0.04289		73.406	0.04886		61.1524	0.02005		63.3488	0.02187		55.8926	0.02366		60.4588	0.05362		62.8286	0.05332		61.4414	0.04872		51.1733	0.05184		45.084	0.05542		48.6676	0.04145		48.6676	0.03926		36.5874	0.0351		35.1424	0.0228
74.1574	0.07881		52.8292	0.05566		40.5756	0.02041		50.7484	0.04771		72.25	0.03159		73.8684	0.09794		73.5216	0.02589		55.9504	0.03438		56.8752	0.04383		55.1412	0.0592		66.9902	0.04933		49.585	0.06558		56.8752	0.06938		45.6042	0.03996		44.8528	0.04303		47.2804	0.03202		49.3612	0.0314
64.7938	0.06803		53.9274	0.05456		45.7776	0.04118		62.1928	0.05603		50.864	0.05011		73.8684	0.03667		57.222	0.02175		72.3656	0.05262		58.378	0.05866		44.8528	0.05171		72.1922	0.05438		50.8762	0.06553		50.0548	0.06736		41.6738	0.04498		43.35	0.04677		50.0548	0.05109		40.46	0.03352
65.5452	0.07358		49.6502	0.04276		35.258	0.03185		44.3326	0.03301		61.7882	0.03308		78.897	0.04353		71.0362	0.05109		94.2718	0.04542		53.4072	0.0591		88.3184	0.07429		61.9616	0.03977		51.6779	0.05776		53.8118	0.08401		38.4948	0.04702		50.9796	0.04377		42.5408	0.02861		39.8242	0.03665
52.4246	0.07697		59.9964	0.06487		41.6738	0.03777		44.4482	0.04639		54.91	0.03668		68.9554	0.06356		70.4004	0.03099		67.5682	0.04125		60.4588	0.08695		51.0374	0.06264		56.7596	0.05201		44.4723	0.0521		56.1816	0.05497		54.1586	0.04399		41.5004	0.04493		45.6042	0.03811		55.3724	0.0507
51.2108	0.08071		45.0262	0.0371		51.5576	0.0138		47.8006	0.05567		58.7826	0.03972		56.066	0.03523		70.227	0.06374		74.5042	0.03382		52.598	0.06206		64.5626	0.0311		77.9144	0.03345		41.2687	0.06715		49.1878	0.05128		54.91	0.06403		40.5178	0.03874		48.7254	0.04239		44.9106	0.03569
47.2804	0.06028		50.7484	0.05947		35.547	0.02453		57.4532	0.03882		66.8746	0.03572		69.2444	0.0344		57.1064	0.03395		60.9212	0.04424		57.8578	0.06163		50.4594	0.05304		49.8814	0.04607		55.5549	0.05505		44.506	0.0484		44.2748	0.03825		32.368	0.03212		39.4196	0.03244		49.6502	0.06663
50.4594	0.08675		57.1064	0.04078		37.281	0.02446		41.7894	0.03732		80.1686	0.06682		70.4582	0.06013		55.7192	0.02439		70.8628	0.04629		64.7938	0.04352		56.0082	0.03518		59.7652	0.03486		45.7868	0.04935		45.951	0.06512		46.7024	0.04628		42.3674	0.03445		49.5924	0.04832		49.7658	0.05355
58.2046	0.08593		50.6906	0.04255		44.9684	0.02867		47.4538	0.05248		70.6316	0.04035		62.7708	0.04585		77.0474	0.06318		65.025	0.0275		52.0778	0.07134		51.0952	0.08284		73.5216	0.09389		45.7413	0.03789		51.9622	0.05752		50.5172	0.03336		43.5812	0.04444		40.46	0.03782		44.0436	0.04523
53.8696	0.06661		56.5862	0.0383		32.1946	0.02599		47.2804	0.05456		89.301	0.09507		79.6484	0.06329		66.759	0.03647		70.6894	0.02561		54.5054	0.06048		55.7192	0.05702		53.3494	0.03394		52.8302	0.06589		43.1188	0.04023		42.6564	0.05937		42.0784	0.02943		41.905	0.06308		44.1592	0.04219
68.0306	0.06827		52.598	0.03583		44.7372	0.02263		52.0778	0.04972		62.8286	0.03968		78.8392	0.07634		65.314	0.03205		64.5048	0.02153		68.0884	0.08263		54.621	0.06188		72.539	0.0304		48.9603	0.04754		44.1014	0.053		51.442	0.04832		39.593	0.03356		49.5346	0.06104		39.7086	0.04085
56.8174	0.06551		73.695	0.02919		47.974	0.03398		43.928	0.04455		79.9952	0.04928		79.6484	0.04372		68.8398	0.03138		59.9964	0.02861		66.2966	0.06656		50.4594	0.0451		68.4352	0.04426		46.3903	0.05064		44.9684	0.0486		57.2798	0.04555		46.9914	0.03242		45.951	0.03985		46.9336	0.05451
49.1878	0.0642		63.8112	0.05677		49.997	0.03224		46.0088	0.04624		68.7242	0.042		77.6832	0.05658		60.6322	0.02409		61.7882	0.02886		65.3718	0.08368		55.6614	0.0458		52.7714	0.04411		47.9846	0.05935		40.4022	0.0794		39.304	0.03282		40.6912	0.03774		43.4656	0.05496		40.8068	0.02947
49.8236	0.07482		79.5328	0.05592		39.7664	0.02068		52.309	0.0458		51.9044	0.0361		57.7422	0.02936		63.58	0.03335		80.631	0.08325		51.0374	0.06005		52.598	0.04389		86.0642	0.02503		42.9998	0.05472		50.2282	0.06662		43.4656	0.03511		43.2922	0.04865		48.8988	0.06899		44.6794	0.02499
61.9038	0.0829		58.2624	0.05778		49.8814	0.08344		48.1474	0.0629		69.4756	0.04459		84.1568	0.04859		60.979	0.04671		65.0828	0.03799		62.424	0.09047		54.9678	0.0524		43.6968	0.05151		36.3238	0.02801		45.951	0.0529		46.529	0.02507		45.3152	0.03369		42.5986	0.04011		46.1822	0.03923
45.7198	0.06907		62.424	0.05309		50.6328	0.02958		43.2922	0.04452		58.2046	0.03601		69.649	0.04308		54.6788	0.09488		63.4644	0.04951		61.846	0.06101		48.7254	0.02945		75.8336	0.03649		39.4811	0.03774		50.9796	0.07482		40.171	0.05927		42.772	0.0318		48.263	0.05181		47.2226	0.03071
47.4538	0.06168		54.1586	0.04345		50.5172	0.03646		38.4948	0.0388		65.4874	0.05987		55.6036	0.03607		72.25	0.05386		54.2742	0.02575		46.3556	0.04778		53.754	0.04663		66.1232	0.03867		53.6401	0.06142		53.2338	0.07028		53.465	0.05407		42.3096	0.02063		42.483	0.05864		37.8012	0.02414
50.4016	0.06868		67.2214	0.04987		44.3904	0.02365		50.0548	0.03913		68.7242	0.03709		75.718	0.05302		78.7236	0.06095		63.1754	0.01939		53.2916	0.04636		60.8634	0.06676		55.8348	0.04271		52.9741	0.05124		44.1592	0.04651		45.0262	0.02553		51.4998	0.04051		37.3966	0.02258		43.8702	0.03212
50.1704	0.07079		46.7602	0.03476		37.9746	0.01167		45.1996	0.04514		73.984	0.0514		82.7118	0.06029		63.4644	0.03078		59.1294	0.03974		54.2164	0.04865		49.9392	0.03672		46.5868	0.04741		46.2514	0.06244		45.373	0.04117		50.1126	0.03679		46.2978	0.04284		46.0666	0.03257		44.795	0.02935
61.6726	0.05155		63.6956	0.04475		63.291	0.02576		41.4426	0.04129		55.7192	0.0348		64.7938	0.04083		77.3364	0.05282		67.2214	0.05168		53.5228	0.0756		59.6496	0.04626		57.9734	0.05384		52.6648	0.05131		45.373	0.04117		45.8932	0.04011		33.6974	0.04588		40.9802	0.018		42.0206	0.02449
48.6098	0.05969		56.933	0.05144		49.9392	0.0229		51.9622	0.05419		58.0312	0.03867		62.135	0.04959		60.5744	0.02552		68.0884	0.04041		61.9616	0.08338		72.1344	0.03798		69.5912	0.05603		52.9375	0.06061		50.1704	0.05517		43.4078	0.05446		45.4308	0.04145		48.0896	0.04787		46.1822	0.05313
70.6316	0.07908		40.6334	0.03837		44.1592	0.0255		48.0896	0.06288		74.5042	0.03819		57.511	0.04179		67.7416	0.02563		67.048	0.04603		51.731	0.05173		85.7174	0.04211		59.8808	0.05149		46.9708	0.06887		49.419	0.06809		56.5284	0.04309		48.4364	0.04683		50.9218	0.03743		42.3674	0.0299
71.6142	0.08719		42.483	0.01853		33.524	0.03319		32.4258	0.03154		63.9268	0.04458		59.534	0.05536		63.8112	0.02921		66.8168	0.02394		64.2158	0.062		63.6378	0.04789		81.2668	0.04249		52.7822	0.05046		46.8758	0.05076		43.639	0.04688		43.4078	0.02631		41.6738	0.04005		48.6676	0.04873
66.1232	0.06478		56.355	0.05528		36.9342	0.03231		46.9336	0.04385		75.718	0.05675		66.181	0.02646		70.227	0.04445		59.3606	0.0339		56.644	0.06223		55.2568	0.04106		71.3252	0.04118		47.4106	0.05685		51.5576	0.06167		35.2002	0.06547		39.5352	0.03543		53.2916	0.04492		46.24	0.03974
63.4644	0.0799		45.373	0.04007		43.7546	0.02306		60.9212	0.05042		46.9914	0.04675		77.1052	0.06061		60.9212	0.02186		62.6552	0.03461		64.7938	0.06943		59.534	0.05688		62.7708	0.04277		48.7902	0.04536		40.9802	0.04745		43.928	0.04305		51.731	0.06976		42.1362	0.03283		45.1996	0.07516
63.4644	0.0799		53.2916	0.05629		59.0716	0.0143		54.6788	0.03569		72.3656	0.05047		72.6546	0.07309		63.58	0.0486		60.112	0.0425		61.4414	0.07188		65.4296	0.06261		61.2102	0.04698		44.4108	0.04335		45.084	0.05852		43.1188	0.03599		41.4426	0.02732		43.4078	0.04297		43.061	0.04383
55.7192	0.07873		48.7254	0.04371		44.6216	0.03535		37.859	0.02393		63.8112	0.03806		56.8752	0.04819		71.3252	0.02979		66.7012	0.05242		61.7882	0.07684		50.9218	0.05183		80.2264	0.05196		45.9255	0.0555		38.2058	0.03602		46.24	0.0394		47.2804	0.05274		46.2978	0.03896		51.8466	0.05616
45.7776	0.0492		68.7242	0.0522		42.483	0.03025		56.355	0.05078		70.516	0.06731		69.1288	0.06707		59.6496	0.03014		102.711	0.05048		63.4644	0.0609		46.3556	0.04694		54.332	0.0573		44.5896	0.06888		46.529	0.05575		48.7254	0.04501		38.2058	0.0338		45.1418	0.05183		44.6216	0.04057
94.9076	0.05285		55.7192	0.06438		43.6968	0.03038		41.0958	0.03816		51.0952	0.03397		73.5216	0.03623		64.9672	0.03191		65.314	0.05113		57.6844	0.08224		54.6788	0.03554		87.5092	0.07609		41.877	0.0518		44.4482	0.03873		46.24	0.03765		40.9224	0.03652		46.7024	0.05972		39.304	0.03306
44.506	0.0674		53.2916	0.06302		37.281	0.03287		44.7372	0.02199		58.7826	0.03846		73.695	0.03958		72.1344	0.03649		57.8578	0.04144		62.3084	0.06084		57.8578	0.02949		61.7304	0.05153		53.9392	0.05936		45.3152	0.03455		50.1704	0.04901		53.0026	0.0436		44.217	0.04991		55.6614	0.04656
56.9908	0.06253		56.7596	0.05869		36.6452	0.02465		52.3668	0.04661		64.6782	0.032		81.1512	0.06417		64.6204	0.02803		54.4476	0.0449		61.6726	0.07014		62.7708	0.04691		58.3202	0.06656		52.3237	0.06504		47.6272	0.04218		45.3152	0.03616		53.9852	0.05346		43.928	0.05986		46.1822	0.05619
57.6844	0.10157		57.6266	0.04441		40.9802	0.027		74.851	0.04837		65.1406	0.04146		63.3488	0.02895		80.92	0.03129		81.209	0.05825		53.3494	0.04606		55.5458	0.03969		57.3954	0.07577		37.9425	0.06668		38.9572	0.05236		41.6738	0.03775		42.772	0.04846		54.4476	0.04848		47.107	0.0448
48.7832	0.06922		51.3842	0.07909		59.0716	0.01592		46.4134	0.04372		48.7832	0.03473		97.7398	0.07424		68.4352	0.04472		68.204	0.06391		52.1356	0.04656		57.3954	0.05549		56.0082	0.04283		44.4765	0.06191		46.9914	0.04213		44.6216	0.03595		46.7024	0.05277		50.9218	0.05671		54.4476	0.03461
65.3718	0.06569		46.4712	0.06392		48.552	0.03765		42.5408	0.02269		69.2444	0.05271		61.0368	0.07755		79.0126	0.06053		76.4694	0.02618		64.158	0.07778		53.6962	0.04259		45.373	0.01995		52.4469	0.08721		40.5178	0.05376		46.3556	0.04638		40.171	0.03132		37.9746	0.03625		45.5464	0.03372
57.222	0.07215		58.1468	0.04721		42.0784	0.03873		39.4196	0.02819		56.5284	0.04018		90.9772	0.03823		74.7354	0.04734		63.7534	0.03367		51.6732	0.06323		55.1412	0.05646		62.1928	0.05424		39.4291	0.04783		56.933	0.05283		46.5868	0.06135		48.2052	0.03418		42.194	0.07329		38.3214	0.04854
55.2568	0.08083		44.5638	0.0759		42.0784	0.05302		35.547	0.03768		75.0822	0.03047		64.6782	0.05306		69.9958	0.05576		72.828	0.0276		48.0896	0.04799		54.043	0.08065		69.649	0.03953		48.6108	0.06374		39.4196	0.05698		48.0896	0.04939		52.1934	0.0377		46.9336	0.05328		45.1418	0.0333
47.974	0.08645		45.084	0.04992		43.639	0.04969		54.7366	0.04728		68.3196	0.03863		61.0368	0.07398		62.6552	0.02586		68.0306	0.03588		51.2686	0.04161		55.0256	0.04633		66.5278	0.04847		42.308	0.05993		40.8646	0.03898		44.6794	0.0343		49.9392	0.04695		47.8584	0.05619		43.6968	0.03408
55.6036	0.06919		53.0604	0.05726		51.731	0.04036		40.1132	0.02291		95.4856	0.05296		66.8168	0.05634		61.0368	0.02789		66.6434	0.04429		57.3954	0.06605		61.846	0.07366		51.153	0.04273		45.8861	0.05974		51.2108	0.06285		42.3096	0.03405		51.731	0.0491		49.9392	0.07024		41.4426	0.03723
49.5924	0.05986		54.91	0.05668		37.3388	0.01755		42.6564	0.0508		62.1928	0.03754		78.608	0.05724		57.8	0.0264		70.4582	0.037		48.6098	0.04795		77.2786	0.05442		58.0312	0.04156		45.7843	0.03155		49.2456	0.05294		45.5464	0.03997		53.0604	0.05168		47.4538	0.04641		47.107	0.06205
54.5632	0.07216		60.3432	0.03942		54.8522	0.01836		42.772	0.04368		58.1468	0.04111		65.9498	0.06445		67.4526	0.06717		52.3668	0.02537		49.9392	0.06292		55.2568	0.05407		63.9846	0.04796		43.2721	0.04518		52.6558	0.08168		47.396	0.05486		52.4246	0.06078		45.951	0.06056		45.1996	0.03973
41.905	0.06765		57.511	0.08634		45.951	0.02412		45.5464	0.0468		70.805	0.05306		77.452	0.06524		50.0548	0.03578		61.6726	0.02741		48.4364	0.04765		54.2742	0.02746		66.7012	0.04298		41.8687	0.03074		44.0436	0.05861		44.9684	0.05077		48.4364	0.04597		35.9516	0.03049		50.575	0.03947
59.9964	0.09519		58.956	0.06583		40.6912	0.02384		53.8118	0.05896		79.475	0.03882		98.3178	0.04807		57.2798	0.01594		66.9324	0.03098		50.9218	0.04452		54.1586	0.05576		57.5688	0.0521		43.8852	0.02237		48.841	0.06399		43.639	0.04268		48.7254	0.03927		49.8236	0.04711		41.7894	0.03003
53.8696	0.08784		47.107	0.03046		44.1014	0.02911		41.905	0.0233		63.5222	0.04037		86.6422	0.10132		71.9032	0.04139		66.8746	0.02928		51.5576	0.04747		57.9734	0.03226		54.6788	0.06244		49.0259	0.06262		47.107	0.03034		43.7546	0.0476		48.2052	0.03887		41.616	0.0381		44.3326	0.03774
89.1854	0.07685		50.9796	0.05935		41.327	0.01192		38.3792	0.03148		86.9312	0.0504		73.0014	0.0436		59.9964	0.02165		56.355	0.03968		56.5862	0.03262		55.199	0.06836		62.3662	0.08635		59.8479	0.0633		51.153	0.05543		51.2686	0.04878		46.3556	0.04604		44.9106	0.05069		47.9162	0.05513
40.8646	0.07428		69.1866	0.06795		43.928	0.03319		46.9336	0.0375		69.2444	0.04074		55.6614	0.05882		58.8404	0.02045		55.1412	0.02215		63.8112	0.06707		53.4072	0.04913		82.0182	0.06558		52.0264	0.04864		45.7198	0.06376		45.7198	0.04738		46.6446	0.0421		49.8236	0.07035		43.8702	0.02771
53.754	0.06249		44.3326	0.03471		55.8926	0.01785		39.882	0.02727		62.713	0.03853		71.2096	0.0796		57.9734	0.05323		63.291	0.02111		64.447	0.05382		56.355	0.07277		61.2102	0.05714		42.8369	0.04258		53.1182	0.06765		40.9224	0.031		44.9106	0.06567		41.905	0.04416		47.1648	0.02978
56.0082	0.08851		65.025	0.04957		52.0778	0.02247		51.6154	0.05814		69.938	0.04648		112.363	0.05964		55.7192	0.03186		61.0946	0.04654		55.2568	0.05196		58.089	0.05639		59.534	0.02501		48.4997	0.06995		51.9622	0.07633		49.419	0.03421		46.0666	0.04188		44.1592	0.0387		39.0728	0.03786
52.8292	0.06612		48.6676	0.06133		39.015	0.05472		48.0318	0.02575		96.5838	0.05286		78.6658	0.04651		60.0542	0.04969		62.3084	0.03461		58.378	0.0452		63.3488	0.03685		62.8864	0.04709		42.8201	0.04852		55.3724	0.05014		43.9858	0.03126		51.0374	0.03667		48.3208	0.04266		38.3792	0.04337
52.598	0.08169		45.5464	0.03867		50.286	0.01866		49.5346	0.04358		74.0418	0.04779		67.5104	0.05539		62.713	0.02174		52.6558	0.02359		56.5862	0.06058		56.1238	0.05099		59.7652	0.04499		39.1553	0.04862		49.2456	0.06306		44.5638	0.04113		34.1598	0.0621		47.8584	0.03384		41.1536	0.02715
48.841	0.05779		40.5178	0.02838		44.3904	0.01533		39.304	0.02683		71.6142	0.09101		61.9038	0.03362		72.1922	0.04143		65.4874	0.03339		50.6906	0.07798		83.9256	0.05016		58.956	0.03952		54.356	0.05925		49.2456	0.04576		44.1014	0.03644		44.506	0.03511		48.3208	0.04032		46.2978	0.04497
42.9454	0.03607		41.8472	0.03114		56.066	0.06173		38.6104	0.03101		55.8348	0.04827		62.5396	0.03663		80.3998	0.0164		73.4638	0.03965		54.2164	0.07175		57.1642	0.06206		64.9094	0.0376		51.8853	0.05086		51.9044	0.06105		51.3264	0.03724		37.6278	0.04248		54.1008	0.04462		35.4892	0.0346
45.373	0.06137		59.0138	0.06761		41.3848	0.02931		56.5284	0.04023		68.4352	0.0368		84.6192	0.04054		65.7764	0.04123		62.7708	0.04265		50.6328	0.0642		72.7702	0.04112		57.3376	0.04794		47.8241	0.05419		59.9964	0.0725		49.419	0.04398		40.8646	0.03502		44.3904	0.04173		48.7254	0.04488
52.1934	0.07234		48.841	0.05255		49.0144	0.01337		46.7602	0.04885		52.2512	0.03776		67.626	0.03594		56.4128	0.03376		72.1344	0.02979		65.3718	0.08129		58.956	0.06203		59.4184	0.04396		41.6234	0.05077		48.0896	0.04487		46.3556	0.03936		49.2456	0.04015		41.3848	0.03725		41.9628	0.04772
51.7888	0.06565		53.0026	0.04534		47.8584	0.02741		52.598	0.0544		58.7826	0.02413		73.5794	0.07462		66.759	0.04315		62.424	0.02778		55.199	0.10104		51.731	0.03175		84.6192	0.04151		51.5305	0.06429		48.6676	0.05599		47.6272	0.05039		46.5868	0.04132		47.685	0.03198		35.6626	0.02958
62.3084	0.08762		55.488	0.03526		42.8298	0.02117		50.4594	0.04089		51.442	0.03812		66.4122	0.06277		64.6782	0.02737		73.695	0.0275		56.4128	0.05736		54.332	0.04293		67.2214	0.03547		47.1884	0.04865		46.8758	0.06331		42.0206	0.04113		36.9342	0.02885		48.8988	0.03553		50.1704	0.06702
54.2742	0.06761		45.7198	0.03613		49.7658	0.04201		40.8068	0.0466		56.4128	0.03891		64.5048	0.07313		64.5048	0.04172		64.9094	0.03336		53.5228	0.06907		52.3668	0.02686		63.9268	0.08466		47.4469	0.06078		48.6098	0.05465		38.9572	0.03482		43.5234	0.03144		52.7714	0.04486		47.396	0.03941
63.58	0.08018		46.7024	0.07803		52.1356	0.01784		43.4078	0.05187		78.5502	0.071		76.0648	0.07917		55.0834	0.02224		63.8112	0.02704		62.1928	0.09179		62.2506	0.04636		72.1922	0.03861		50.9571	0.05125		47.2804	0.06769		52.9448	0.04129		42.0206	0.03871		42.0206	0.03795		42.3674	0.03439
75.429	0.08857		69.8802	0.04727		48.7254	0.02807		47.4538	0.04169		77.2208	0.03228		74.851	0.04208		68.3774	0.04751		69.5912	0.04163		44.3904	0.04972		53.754	0.0379		64.5048	0.04758		41.399	0.05178		48.9566	0.06763		43.1188	0.04747		44.3326	0.04388		43.5234	0.05027		49.5924	0.0277
57.7422	0.08099		64.158	0.05224		39.4774	0.03526		40.0554	0.04876		58.7826	0.04163		61.3258	0.03265		71.8454	0.05533		60.8056	0.03607		56.8752	0.08635		50.3438	0.03925		55.777	0.03876		47.0498	0.05152		46.4134	0.05036		45.1418	0.03951		40.2288	0.02053		47.8006	0.03456		48.7832	0.04954
64.1002	0.08976		42.5986	0.04824		43.1188	0.02461		47.3382	0.04714		71.7876	0.06695		66.7012	0.05898		57.7422	0.02887		66.47	0.04843		52.5402	0.05133		58.2046	0.04642		47.107	0.04103		34.6362	0.03868		62.0772	0.06319		50.1126	0.04517		48.263	0.04156		41.038	0.03719		44.1592	0.03589
55.1412	0.08044		49.5924	0.06992		43.6968	0.04139		49.3612	0.03789		70.8628	0.02648		89.8212	0.03977		65.025	0.03958		61.0946	0.03854		53.1182	0.06435		55.5458	0.05215		58.4936	0.04256		41.6925	0.03777		44.506	0.05137		43.2344	0.03426		43.4656	0.03458		39.1884	0.04943		38.7838	0.03607
60.3432	0.06984		59.6496	0.07773		55.9504	0.04363		50.4016	0.0788		63.8112	0.03229		83.0008	0.05375		65.7186	0.08305		89.4744	0.04794		58.2624	0.05092		51.3842	0.03618		54.1008	0.03972		36.2003	0.03288		49.708	0.06047		44.0436	0.03635		35.1424	0.02486		49.5346	0.06287		38.437	0.03913
54.9678	0.04918		44.0436	0.03722		60.8056	0.02353		61.4414	0.05127		60.4588	0.06536		62.2506	0.05787		87.0468	0.03757		66.2966	0.03957		63.2332	0.05396		59.7074	0.045		61.4992	0.04756		49.0413	0.05095		40.6912	0.04425		42.5986	0.05075		45.951	0.03944		43.0032	0.03088		49.2456	0.0328
57.1064	0.08479		76.7584	0.048		34.5644	0.04091		63.9846	0.04391		60.5744	0.03786		78.608	0.06431		76.874	0.07188		61.3258	0.03628		50.7484	0.07201		60.9212	0.03926		52.2512	0.04459		48.8166	0.06847		60.4588	0.06824		41.7316	0.03584		45.5464	0.04897		41.6738	0.0375		39.4196	0.02379
59.4184	0.05721		42.8876	0.04588		43.5812	0.04995		46.1244	0.03875		61.1524	0.03419		59.4762	0.0464		72.0766	0.04743		60.3432	0.03446		70.1114	0.07657		51.6732	0.06027		64.2158	0.0519		52.2852	0.07414		40.6912	0.04425		44.1014	0.03949		57.5688	0.03502		41.327	0.02738		45.4886	0.04905
58.5514	0.08619		51.153	0.04564		43.061	0.03557		53.9274	0.04202		82.7696	0.03291		69.071	0.06076		57.3954	0.01846		63.0598	0.04266		64.158	0.05581		64.447	0.04114		78.3768	0.04804		49.4286	0.03692		60.4588	0.06824		49.7658	0.03696		46.4134	0.05354		47.974	0.03707		41.2692	0.03305
80.2264	0.06311		61.7304	0.0617		44.506	0.0314		55.9504	0.06255		56.066	0.03003		65.7764	0.0433		63.6956	0.05939		90.457	0.04514		52.5402	0.05991		56.066	0.04542		51.0952	0.03559		47.2181	0.04963		49.9392	0.05321		38.2058	0.03315		45.7198	0.0432		43.4656	0.04335		48.3208	0.03958
49.4768	0.05204		55.6036	0.04823		47.2226	0.02651		49.4768	0.02162		60.5744	0.05058		77.2786	0.06179		79.3594	0.05279		69.071	0.03757		62.4818	0.0938		54.8522	0.03712		80.053	0.06201		51.9886	0.05771		52.9448	0.06837		37.281	0.03314		49.4768	0.04219		44.4482	0.03871		39.9398	0.02531
94.4452	0.08556		52.3668	0.03825		48.0318	0.01961		45.3152	0.06104		79.5906	0.05941		105.138	0.0798		66.3544	0.04631		61.557	0.02827		62.7708	0.10077		85.8908	0.05154		61.268	0.04697		46.6544	0.03585		46.1244	0.04595		40.749	0.03177		50.7484	0.03743		47.8584	0.05274		42.2518	0.02848
53.0026	0.0575		49.3612	0.04727		48.4942	0.03325		43.4656	0.03983		59.245	0.0429		91.7864	0.05768		55.0834	0.02069		63.869	0.03692		69.3022	0.1214		65.9498	0.09828		69.071	0.03387		46.3715	0.04946		50.5172	0.06426		45.662	0.04892		39.7664	0.04228		43.8702	0.03162		45.1996	0.02595
77.8566	0.0965		41.038	0.05489		45.1996	0.02566		41.2692	0.02992		53.8118	0.03638		82.4228	0.08965		70.0536	0.0488		73.984	0.07		46.7602	0.03915		57.6844	0.04898		75.8336	0.07657		44.9674	0.04882		51.4998	0.04422		42.0206	0.04257		45.8932	0.04373		42.8876	0.03329		41.6738	0.02877
54.5054	0.07471		43.928	0.05306		37.859	0.02725		37.1654	0.04052		50.0548	0.03609		68.6086	0.05336		87.1046	0.05276		56.4128	0.04402		54.9678	0.05197		54.5054	0.02956		76.6428	0.03698		45.2001	0.05787		55.9504	0.06797		37.5122	0.02689		43.8702	0.03755		44.217	0.0505		36.2406	0.02691
66.4122	0.06779		49.4768	0.05448		61.0368	0.02949		48.0318	0.05093		70.6316	0.03041		65.1984	0.05926		64.158	0.03939		65.2562	0.03921		49.4768	0.07549		54.2164	0.04442		62.0194	0.02793		46.0773	0.0545		55.777	0.05574		39.6508	0.02392		44.1014	0.03875		40.6334	0.02133		48.0318	0.03287
65.8342	0.0532		46.2978	0.05257		43.928	0.01673		48.3786	0.03986		61.268	0.03657		71.9032	0.04321		50.864	0.05537		59.7074	0.03053		53.0604	0.06216		55.5458	0.0415		63.2332	0.03707		57.2569	0.0644		48.3208	0.04426		52.4824	0.037		40.5178	0.04696		43.4078	0.0353		38.3792	0.06173
51.0952	0.08617		64.736	0.06165		44.6794	0.02613		31.501	0.02781		58.2624	0.02569		55.8926	0.09438		57.3376	0.02527		69.9958	0.03407		65.8342	0.07006		57.511	0.04305		58.2046	0.06698		50.9553	0.05569		50.3438	0.0618		48.1474	0.03933		51.731	0.06066		38.148	0.05073		39.7086	0.04049
66.3544	0.06912		42.5408	0.05209		38.9572	0.03282		50.3438	0.05131		54.1008	0.04824		68.3774	0.0402		59.1872	0.03554		77.0474	0.02302		55.9504	0.06556		67.1058	0.05646		43.5234	0.02649		47.0587	0.06773		47.5116	0.05196		46.5868	0.03456		31.79	0.02712		44.4482	0.04379		48.3786	0.04356
42.9454	0.06883		59.3606	0.05527		44.8528	0.02853		37.859	0.04042		86.1798	0.04965		55.2568	0.03528		72.8858	0.04366		66.759	0.02389		45.7198	0.06138		52.598	0.06095		57.8578	0.08997		53.8887	0.06903		47.5116	0.05196		41.905	0.02745		42.7142	0.04191		43.928	0.03797		47.974	0.03733
51.153	0.08289		49.7658	0.04794		41.0958	0.05109		47.8006	0.03563		91.6708	0.06387		71.5564	0.04463		73.3482	0.03526		66.9324	0.04364		62.3084	0.07495		61.6148	0.04585		53.6962	0.04703		42.683	0.04113		49.13	0.05054		35.258	0.02722		37.8012	0.03487		39.9398	0.04213		50.9796	0.03898
46.1822	0.0779		48.7832	0.03725		51.2108	0.05706		56.7018	0.0565		56.355	0.02923		59.8808	0.06965		69.9958	0.02841		60.5744	0.03809		56.4706	0.07387		54.8522	0.05097		61.268	0.02811		44.412	0.04852		45.373	0.05323		43.2344	0.04396		40.4022	0.0501		40.8646	0.05837		49.0144	0.03429
50.286	0.05264		38.7838	0.02819		55.777	0.0261		38.3792	0.04112		68.1462	0.03358		74.273	0.09454		67.6838	0.05793		60.3432	0.02462		62.0772	0.05667		58.4358	0.05022		49.6502	0.04326		50.3428	0.04907		52.6558	0.06127		41.0958	0.04406		45.8932	0.03354		46.818	0.02281		41.038	0.04771
73.5216	0.06519		47.5694	0.0568		40.8646	0.03684		51.9622	0.02803		74.3308	0.0607		88.434	0.05297		55.3146	0.03516		60.69	0.03512		60.6322	0.03975		57.7422	0.03951		48.3208	0.04852		39.5412	0.04416		61.4992	0.07935		35.3736	0.02769		42.0206	0.04579		43.6968	0.03089		46.4712	0.04037
50.4594	0.07027		47.2804	0.03879		46.6446	0.03852		37.0498	0.02733		64.3892	0.04249		64.3314	0.03481		66.47	0.0564		63.869	0.03424		54.6788	0.03425		56.7596	0.06532		51.9044	0.03274		51.3338	0.06064		53.0026	0.06386		37.6856	0.04459		45.8932	0.04765		42.194	0.04219		41.038	0.05502
57.7422	0.09565		60.1698	0.05682		47.2226	0.01836		72.7702	0.05326		89.1854	0.07237		73.2904	0.05195		71.094	0.04334		61.4992	0.02872		56.8752	0.05039		57.6266	0.03971		58.4936	0.09032		48.3961	0.05561		44.4482	0.04518		45.662	0.03472		41.9628	0.03819		52.309	0.04385		49.3034	0.03582
60.5166	0.06985		60.69	0.0374		38.726	0.02105		34.9112	0.03365		63.4066	0.04095		80.6888	0.06081		68.9554	0.02903		74.1574	0.03584		70.5738	0.08901		72.1344	0.0902		88.3184	0.06091		46.7692	0.07138		54.043	0.061		46.3556	0.03495		50.7484	0.04988		46.529	0.03845		46.5868	0.05699
64.9672	0.11144		40.6912	0.04153		50.9796	0.02286		51.3842	0.04693		63.58	0.02331		74.7932	0.02844		74.0996	0.02541		59.3606	0.02282		62.7708	0.04959		61.0368	0.03569		66.8746	0.04726		53.196	0.05745		44.4482	0.04518		61.3836	0.05644		44.9106	0.03598		49.2456	0.04893		46.4134	0.04209
53.2338	0.06236		52.1356	0.05759		41.616	0.01815		40.2288	0.03442		59.0716	0.03275		90.168	0.11043		64.5048	0.07057		79.2438	0.05322		66.3544	0.05653		52.1934	0.05315		72.539	0.06479		47.2614	0.05726		54.043	0.061		45.8932	0.03561		42.5986	0.06247		38.6682	0.04441		59.0138	0.05649
52.4824	0.05993		45.6042	0.0405		40.6912	0.02747		45.4308	0.04347		68.0306	0.05695		68.8398	0.08682		58.2046	0.04492		63.4066	0.03496		59.0716	0.05624		63.7534	0.04053		70.1692	0.04971		48.4032	0.05187		51.9044	0.06468		47.685	0.03313		49.8814	0.0377		41.7316	0.05883		50.2282	0.0415
42.3674	0.06217		49.7658	0.03791		35.2002	0.01734		43.1766	0.06244		76.874	0.05695		66.0076	0.05057		57.1642	0.01321		69.36	0.02893		55.777	0.05979		51.0374	0.02604		61.7882	0.06104		39.2357	0.03208		48.841	0.07048		42.0206	0.04105		46.9914	0.0498		45.4308	0.03433		39.4196	0.0343
52.887	0.0733		53.9852	0.06482		52.598	0.02516		47.1648	0.04045		102.017	0.04874		78.1456	0.0408		90.2258	0.05501		58.1468	0.02246		58.1468	0.05307		57.8	0.04221		77.9722	0.05127		46.6016	0.04165		46.9336	0.04604		41.0958	0.04261		57.8578	0.04996		41.1536	0.05384		45.662	0.02875
46.2978	0.03996		56.2394	0.0687		45.4308	0.02023		55.1412	0.04783		67.1636	0.0506		62.6552	0.04716		58.2624	0.03846		56.5862	0.06704		50.9796	0.06487		61.3258	0.04918		47.1648	0.06419		58.9087	0.05293		48.552	0.05777		43.4656	0.03092		42.8876	0.04383		48.2052	0.04321		41.1536	0.03618
46.2978	0.05981		57.511	0.03631		48.7254	0.03266		62.3662	0.06354		59.0716	0.03461		76.2382	0.038		72.25	0.02222		67.626	0.02101		56.8752	0.04144		57.3376	0.05029		66.5278	0.12598		45.9481	0.02648		45.662	0.05201		51.0374	0.02973		46.5868	0.0323		56.1238	0.05307		41.038	0.0296
70.805	0.08924		53.2338	0.05735		40.2866	0.01135		52.4246	0.05894		69.3022	0.04359		60.0542	0.07298		59.534	0.02095		68.5508	0.03728		61.6148	0.03565		85.8908	0.05363		57.6266	0.0447		43.8963	0.05208		49.708	0.05509		46.2978	0.04245		55.3146	0.04004		53.2916	0.05149		45.2574	0.03825
55.7192	0.06455		68.6664	0.04144		42.4252	0.04312		44.9106	0.05428		53.5806	0.03742		79.764	0.08365		69.36	0.02994		58.378	0.03162		54.5632	0.0742		56.4128	0.02577		56.4706	0.07148		40.8703	0.05049		54.5632	0.05023		44.506	0.05009		42.7142	0.05618		48.4942	0.03644		46.1822	0.05095
50.1126	0.0839		54.3898	0.06352		35.836	0.03012		62.5396	0.05117		58.1468	0.04071		73.1748	0.094		61.6726	0.0216		62.2506	0.04998		70.9206	0.08251		55.6614	0.05645		49.7658	0.03399		46.9695	0.05012		45.7776	0.06638		38.437	0.04662		45.8932	0.0449		39.593	0.03761		47.0492	0.04692
57.8	0.07469		40.9224	0.04966		50.8062	0.02799		49.3034	0.03628		70.1114	0.05954		63.1754	0.10141		52.5402	0.04205		63.7534	0.0426		52.598	0.04804		51.7888	0.04963		75.8336	0.05817		56.045	0.03901		49.0144	0.06571		40.46	0.03997		51.6154	0.0572		50.1126	0.03735		49.997	0.04666
50.575	0.07594		57.6844	0.07007		47.685	0.01552		45.1418	0.04064		66.2388	0.05796		76.9896	0.04087		65.6608	0.04325		61.0368	0.02912		67.4526	0.06712		54.8522	0.03775		60.6322	0.03437		39.8846	0.05256		49.13	0.0485		44.3326	0.03895		45.7198	0.04904		43.0032	0.04772		36.7608	0.04189
57.3954	0.06163		48.3786	0.04401		45.7776	0.021		43.4656	0.05798		74.6198	0.03769		71.0362	0.04412		84.677	0.04957		61.9038	0.03687		64.1002	0.04539		49.0144	0.03731		43.6968	0.01873		47.0241	0.07122		46.4712	0.03968		35.0268	0.02828		50.864	0.07244		39.2462	0.05075		44.2748	0.03363
55.3724	0.06717		46.818	0.04079		33.1772	0.04373		33.6396	0.03953		62.6552	0.03632		68.3774	0.05459		53.8118	0.023		69.36	0.06331		59.1872	0.04842		62.713	0.06016		64.158	0.06239		49.5479	0.06335		49.4768	0.05383		46.818	0.03932		39.3618	0.02858		52.4246	0.04994		50.0548	0.03237
42.9454	0.05547		48.552	0.04541		44.2748	0.02202		45.4308	0.04228		76.1226	0.04401		72.3078	0.04928		75.4868	0.03078		66.1232	0.04405		53.1182	0.04993		73.1748	0.05274		63.869	0.0462		46.5031	0.06846		46.5868	0.05002		40.171	0.04982		41.2692	0.03875		46.0666	0.0379		44.6794	0.07233
57.222	0.06247		49.6502	0.05485		45.084	0.033		34.5066	0.03717		80.4576	0.05174		61.557	0.08514		62.9442	0.06096		73.4638	0.05237		78.8392	0.12133		53.754	0.08038		73.6372	0.05931		57.4011	0.06138		49.5924	0.07027		43.2344	0.05052		46.1822	0.03984		45.7776	0.04323		40.1132	0.03847
42.0206	0.05454		47.0492	0.06041		42.6564	0.02921		44.7372	0.07498		75.7758	0.06277		61.0368	0.04974		66.9902	0.03841		62.8864	0.0236		52.6558	0.05507		71.3252	0.0405		53.465	0.02736		54.1759	0.06831		41.7894	0.0531		47.4538	0.02175		48.6098	0.03533		47.4538	0.05903		45.1996	0.04125
54.1008	0.07722		76.1804	0.10162		39.9398	0.03761		33.0038	0.03548		78.1456	0.04605		62.135	0.05166		53.2916	0.02812		69.36	0.04445		55.0834	0.04897		64.158	0.04597		52.02	0.0409		53.3182	0.05103		57.8	0.05943		44.9684	0.03698		49.419	0.03396		45.951	0.03657		42.483	0.02973
57.3954	0.11354		51.6154	0.05673		34.9112	0.02596		47.3382	0.04228		65.314	0.03715		83.5788	0.08624		61.9038	0.02028		73.406	0.03965		53.6962	0.08063		56.5862	0.05356		46.818	0.02451		49.0747	0.05415		48.6098	0.07175		41.3848	0.04276		43.9858	0.05149		49.708	0.0609		44.6794	0.03834
56.355	0.06843		63.1754	0.05724		42.0784	0.01837		63.7534	0.04646		58.2624	0.04891		60.6322	0.04767		64.9672	0.0452		77.0474	0.04494		59.245	0.06861		56.933	0.04536		50.9218	0.0418		43.1404	0.03489		42.7142	0.04991		39.4196	0.02588		50.6328	0.05474		44.5638	0.03629		52.02	0.04211
56.1238	0.05226		51.7888	0.0464		42.7142	0.03231		45.1996	0.0387		63.4644	0.03943		63.7534	0.02629		58.378	0.05608		68.8398	0.04529		51.0952	0.05287		58.4936	0.04899		58.2624	0.04041		55.1369	0.05256		38.0324	0.04735		37.9168	0.04406		38.7838	0.03238		38.437	0.03653		44.506	0.06445
51.3264	0.08003		52.6558	0.06368		48.3786	0.02128		46.4134	0.03852		88.2606	0.04216		76.585	0.04196		69.7646	0.03594		68.6086	0.02743		50.286	0.05242		57.9156	0.06021		61.0946	0.07775		51.3148	0.05527		50.864	0.03727		45.662	0.03718		55.3146	0.04251		39.9398	0.05861		38.726	0.03484
52.7714	0.07775		42.0784	0.04651		41.5004	0.01477		28.7266	0.03191		66.8746	0.03787		72.1922	0.05069		66.9324	0.03517		65.0828	0.03426		69.071	0.07988		57.8	0.06727		83.232	0.0424		50.8083	0.05689		46.4712	0.07145		43.1766	0.04513		43.061	0.03897		43.2344	0.04093		49.1878	0.04469
54.9678	0.05602		53.465	0.08032		41.1536	0.02889		44.795	0.04687		69.9958	0.04359		86.5844	0.05687		69.8224	0.03216		72.3078	0.03469		54.9678	0.0661		66.2388	0.05703		47.2226	0.04903		45.5577	0.05978		49.0722	0.06476		39.7664	0.03458		49.7658	0.0335		55.3146	0.03505		49.8236	0.03934
57.6266	0.07528		48.0318	0.03801		40.9802	0.04866		37.1076	0.0391		81.3246	0.04396		73.4638	0.04499		63.0598	0.02304		71.4408	0.03185		54.6788	0.07835		59.0716	0.04542		52.2512	0.05867		46.8968	0.0486		44.6794	0.06525		47.685	0.04372		38.3214	0.0319		43.9858	0.0351		49.0144	0.0449
53.9852	0.07807		52.7136	0.0461		38.3214	0.02412		35.3736	0.04074		64.447	0.04491		78.4924	0.12623		63.58	0.03058		77.9144	0.07057		53.754	0.07377		55.9504	0.04979		57.9156	0.05277		50.8623	0.05491		53.3494	0.04776		39.3618	0.03066		38.7838	0.04445		46.1244	0.04738		42.0784	0.04209
54.332	0.0622		45.4886	0.02734		38.8994	0.04678		40.5178	0.05075		73.0014	0.04457		65.7764	0.05838		61.3258	0.02776		59.9964	0.04009		64.3314	0.06013		57.3376	0.06111		55.3146	0.0212		45.5771	0.03588		53.6962	0.06206		50.4594	0.04904		45.6042	0.04202		39.015	0.05042		46.3556	0.04729
56.7596	0.08296		43.5812	0.05206		54.91	0.02537		44.6794	0.04912		69.071	0.04005		69.071	0.04243		74.0418	0.04474		69.7068	0.02603		56.2972	0.03857		57.4532	0.05368		59.6496	0.02738		47.3959	0.04595		44.9684	0.05698		47.4538	0.03588		42.3096	0.03868		47.4538	0.04829		46.9914	0.04456
46.0666	0.05048		42.5408	0.04593		43.4078	0.02011		40.4022	0.03366		59.7652	0.03762		82.4228	0.02758		69.7646	0.01464		89.301	0.02957		53.5806	0.06452		63.3488	0.05338		77.2786	0.14087		44.2967	0.03427		39.9398	0.05552		47.9162	0.05348		41.6738	0.04358		39.015	0.03565		42.7142	0.0297
59.7652	0.09256		49.1878	0.03709		40.1132	0.01765		61.268	0.03778		75.8914	0.05201		83.1164	0.04093		58.4936	0.01637		59.1872	0.04942		56.355	0.06984		53.754	0.05879		59.9386	0.04552		45.2341	0.0316		50.4016	0.05171		39.1884	0.04955		47.4538	0.04805		38.8416	0.03639		41.327	0.0293
45.4308	0.07139		52.02	0.05787		40.6912	0.01879		39.9398	0.03432		57.511	0.0337		59.7074	0.04229		58.3202	0.02898		81.0934	0.05569		72.9436	0.08472		47.6272	0.03383		63.58	0.03195		62.3222	0.08869		55.1412	0.0495		48.8988	0.0449		53.3494	0.04146		39.4196	0.03632		46.5868	0.03893
41.327	0.07664		45.084	0.03494		42.5408	0.02904		47.4538	0.04781		61.0368	0.03813		75.6602	0.04474		65.1984	0.05242		77.741	0.04499		69.2444	0.07427		51.442	0.05801		62.1928	0.03478		48.8986	0.05827		48.4942	0.05495		40.6334	0.03662		43.5234	0.03446		41.0958	0.05591		42.0206	0.03642
51.8466	0.06052		58.6092	0.03298		45.8354	0.02951		44.5638	0.03147		82.943	0.05303		57.511	0.04592		57.1642	0.04195		91.8442	0.10551		56.5862	0.05042		65.4296	0.06127		65.5452	0.0484		51.2218	0.04615		48.0896	0.06323		50.286	0.04448		38.2636	0.03188		47.4538	0.03153		41.7316	0.0325
65.0828	0.05635		47.685	0.05348		46.529	0.02736		32.2524	0.04054		58.089	0.03235		70.2848	0.04767		96.2948	0.04351		59.1294	0.03038		53.465	0.08285		56.2394	0.05509		53.754	0.05825		41.8561	0.04685		53.4072	0.06321		51.2686	0.03634		40.6912	0.03838		36.7608	0.04286		52.887	0.04212
62.3662	0.06002		52.4824	0.10116		38.4948	0.02513		45.1996	0.03471		62.3084	0.03135		62.3662	0.05017		78.7814	0.05716		60.8056	0.03271		62.1928	0.04935		76.9318	0.05237		63.2332	0.03113		49.0866	0.06675		48.6098	0.05399		42.0784	0.0378		45.951	0.04317		58.4936	0.04644		39.4774	0.03578
50.4594	0.04315		40.6334	0.01691		47.7428	0.02871		40.6334	0.0276		88.723	0.07786		63.6956	0.0596		64.5626	0.05008		70.7472	0.04143		50.3438	0.03277		73.3482	0.04671		66.47	0.03315		47.1122	0.06121		46.5868	0.05866		45.4886	0.03741		47.5694	0.04558		39.7086	0.03376		39.5352	0.02241
62.135	0.07298		54.1008	0.03445		34.391	0.02593		40.1132	0.03633		86.8156	0.05444		66.47	0.06677		60.5166	0.03372		65.314	0.04125		78.2612	0.10189		60.0542	0.04115		55.8926	0.02225		58.1369	0.08054		46.7024	0.05113		46.9336	0.03013		40.5178	0.04735		44.5638	0.03649		41.2114	0.02485
52.4824	0.07793		56.1816	0.04662		37.859	0.01604		45.6042	0.05262		54.1008	0.03316		63.58	0.02397		61.0946	0.02599		55.2568	0.03669		72.0766	0.07046		60.5166	0.04468		88.4918	0.0509		44.1637	0.06204		51.4998	0.05717		34.3332	0.03526		41.8472	0.02878		49.997	0.0442		49.5346	0.03986
61.3258	0.09426		69.4178	0.06181		55.488	0.03891		44.0436	0.04373		71.094	0.03506		53.9274	0.04498		55.3146	0.05286		63.6378	0.03895		51.9044	0.05115		64.6782	0.04941		68.204	0.03902		43.0232	0.06152		46.9914	0.05971		46.8758	0.04995		40.5178	0.03739		42.0206	0.03294		42.7142	0.04459
48.8988	0.06967		54.332	0.02416		43.2344	0.02298		47.2226	0.02995		62.0772	0.03776		58.3202	0.03025		72.828	0.01762		49.3034	0.0324		64.5626	0.06783		57.511	0.02726		86.122	0.07783		45.5536	0.03388		48.6676	0.05578		44.7372	0.03425		37.57	0.03396		47.5116	0.03393		42.0784	0.02965
45.5464	0.06205		64.2736	0.06756		43.6968	0.03218		51.442	0.05848		72.8858	0.04558		63.0598	0.07073		52.887	0.03701		77.452	0.04078		54.5632	0.06358		61.0946	0.03157		75.429	0.04722		46.8063	0.0566		50.3438	0.05683		38.5526	0.03664		51.6732	0.05235		46.529	0.03461		50.6906	0.0256
54.4476	0.06963		50.1126	0.0446		39.015	0.02152		48.0318	0.04878		64.2736	0.03302		58.6092	0.0172		55.777	0.01944		56.644	0.03947		65.9498	0.0653		62.3662	0.02828		72.828	0.08252		49.4458	0.07318		47.685	0.04589		47.2226	0.05508		42.3096	0.0341		38.726	0.03174		46.7024	0.02748
52.309	0.07036		42.5408	0.04348		38.5526	0.03063		43.5812	0.04603		56.7596	0.04229		74.562	0.08688		60.2854	0.03563		70.7472	0.04421		54.4476	0.0422		51.6732	0.0504		49.2456	0.02641		63.1341	0.09757		48.9566	0.0459		37.3966	0.03339		46.7024	0.04618		48.0318	0.05599		46.24	0.05662
46.529	0.06263		52.598	0.03261		39.7086	0.02742		43.5812	0.04109		75.5446	0.05236		68.6086	0.03847		69.5912	0.01344		64.6782	0.03915		57.8	0.0418		83.232	0.0436		84.5614	0.0499		46.6911	0.04117		48.6098	0.06885		46.529	0.0378		50.9218	0.04283		44.6794	0.03616		43.1188	0.03523
53.0604	0.09318		48.263	0.06209		40.2866	0.02433		53.6384	0.06335		71.961	0.04482		66.5856	0.0695		80.1686	0.01487		69.8802	0.05011		56.1816	0.05919		63.002	0.04044		78.897	0.05859		41.1372	0.03858		49.6502	0.04685		46.3556	0.03884		38.4948	0.02918		39.5352	0.04364		44.8528	0.02738
46.818	0.073		51.5576	0.01907		58.4936	0.03774		45.8354	0.05636		74.6198	0.03896		74.9666	0.08029		59.4762	0.04334		69.8802	0.0569		57.7422	0.06999		63.6956	0.05026		50.575	0.03905		46.7092	0.05566		46.529	0.04281		43.2344	0.03847		40.3444	0.03498		38.0324	0.03065		42.6564	0.04127
54.4476	0.09137		51.3842	0.07235		53.754	0.01322		36.0672	0.03964		61.6148	0.03786		69.8224	0.06134		63.1176	0.03485		74.562	0.05077		71.094	0.05798		54.8522	0.03777		45.373	0.05088		46.9027	0.06102		50.7484	0.05935		37.8012	0.03073		39.6508	0.03205		49.3034	0.05706		42.5986	0.03074
55.5458	0.0795		51.153	0.05351		39.7664	0.03626		48.7832	0.04777		54.621	0.05327		66.1232	0.03985		72.1922	0.04016		68.493	0.05876		59.3606	0.04872		53.5228	0.07617		81.7292	0.04641		56.7514	0.07878		47.8584	0.06399		40.171	0.04834		42.3096	0.03118		41.0958	0.03943		43.4656	0.03593
83.5788	0.07733		55.1412	0.0557		45.0262	0.02315		46.7024	0.04444		66.0076	0.03974		59.8808	0.02678		66.759	0.05007		53.8696	0.02423		66.9324	0.08388		56.7018	0.04369		88.723	0.0585		41.6675	0.04949		46.7602	0.05329		49.3612	0.03559		51.9044	0.03942		52.0778	0.04303		44.217	0.02733
71.094	0.07639		58.667	0.04055		54.043	0.03486		59.0138	0.06098		62.3662	0.04769		66.3544	0.03733		51.3264	0.02712		62.3662	0.03127		56.4128	0.06679		72.539	0.04499		48.4364	0.02876		44.0563	0.06531		51.2108	0.05134		44.0436	0.06009		44.0436	0.02869		39.8242	0.03844		51.8466	0.03867
49.3034	0.07592		45.662	0.04601		40.8646	0.04352		50.1704	0.04969		72.9436	0.05136		58.956	0.04829		92.5956	0.07423		57.9734	0.0343		55.199	0.07632		59.1872	0.06107		63.8112	0.05317		47.9804	0.05826		53.465	0.06798		47.107	0.03478		41.905	0.03239		47.5694	0.04648		37.57	0.02766
50.1704	0.07695		44.3904	0.03558		42.483	0.06993		53.9274	0.0369		68.4352	0.02909		101.323	0.05136		78.0878	0.03831		71.383	0.0561		60.6322	0.07176		86.7578	0.04922		60.69	0.0338		50.413	0.05284		52.7714	0.06898		41.3848	0.03832		47.6272	0.03457		47.974	0.04907		50.9218	0.03561
47.9162	0.06863		53.465	0.0478		34.2754	0.01592		47.4538	0.0381		66.2966	0.04319		64.9672	0.07991		66.181	0.0417		78.7236	0.05301		61.6148	0.08133		48.8988	0.05309		54.2742	0.02731		43.3357	0.05507		52.6558	0.04963		59.7074	0.05182		54.5632	0.04895		46.6446	0.03988		49.708	0.04818
59.245	0.08402		53.3494	0.03938		40.9802	0.03824		50.3438	0.04663		70.4004	0.03715		88.6074	0.05231		64.7938	0.04354		70.0536	0.03259		51.3842	0.06612		55.0256	0.04149		64.3314	0.06342		51.6701	0.03903		50.9796	0.07025		44.1014	0.02465		52.309	0.04954		45.8932	0.03742		47.9162	0.0387
85.6018	0.0499		48.263	0.04502		38.9572	0.04467		47.0492	0.04765		117.854	0.0522		61.3836	0.01867		67.1058	0.04638		70.4004	0.03573		51.6732	0.06786		50.4594	0.06833		43.7546	0.03674		46.6056	0.03191		39.015	0.03964		49.13	0.05335		50.9218	0.04034		45.662	0.0546		43.2922	0.0313
46.8758	0.05774		71.6142	0.06507		59.5918	0.01583		42.8298	0.04765		68.0306	0.03607		61.846	0.02635		79.7062	0.04935		61.6148	0.03238		60.6322	0.04891		74.0996	0.05502		72.25	0.03739		42.3231	0.03515		44.6216	0.05633		35.3158	0.0544		42.7142	0.04104		43.4656	0.03632		38.3792	0.02905
52.6558	0.06616		50.7484	0.04243		40.2866	0.02701		48.9566	0.05241		51.442	0.03035		85.833	0.07074		60.979	0.01655		54.621	0.02873		59.7074	0.05721		55.6036	0.03846		52.887	0.0364		42.7181	0.04937		62.135	0.06584		45.1418	0.0378		49.3034	0.03881		51.153	0.04699		49.4768	0.03415
51.2686	0.08095		61.3258	0.05646		48.6676	0.04538		48.3786	0.05482		68.3196	0.02771		63.291	0.05759		65.9498	0.04683		58.956	0.03674		56.355	0.06025		56.933	0.0372		60.8056	0.03809		46.1117	0.06135		48.8988	0.07211		37.8012	0.03027		46.8758	0.06481		53.8118	0.05739		55.1412	0.03454
45.2574	0.07062		40.3444	0.05078		53.6384	0.02697		53.2338	0.04687		59.4762	0.05236		77.6254	0.02759		46.9914	0.01466		64.5626	0.02643		63.869	0.08731		66.0654	0.04327		46.7024	0.03785		45.6745	0.04638		44.5638	0.05339		42.483	0.02723		40.8646	0.03461		42.6564	0.04192		40.46	0.03335
48.552	0.06871		55.7192	0.04602		43.8124	0.03587		56.7018	0.04788		66.759	0.03625		69.938	0.04416		75.718	0.02652		67.7416	0.03582		61.6148	0.05677		62.8286	0.06887		77.741	0.10209		50.8178	0.05866		47.8006	0.06024		49.5346	0.05431		50.7484	0.03867		50.7484	0.05045		43.1188	0.03931
53.5806	0.08098		43.35	0.03658		48.1474	0.02328		59.6496	0.05597		72.5968	0.03281		69.3022	0.05334		72.4234	0.02031		63.9268	0.03819		60.5744	0.0927		57.2798	0.04672		53.8118	0.03497		47.2516	0.04307		48.8988	0.07211		44.3326	0.04326		47.6272	0.04015		40.0554	0.03812		46.8758	0.04312
57.3376	0.06146		51.153	0.05837		38.8416	0.01823		37.1654	0.05451		59.5918	0.04559		67.5104	0.03849		66.2966	0.04743		71.4986	0.0348		62.7708	0.07177		50.575	0.08052		70.6894	0.05266		49.8161	0.04394		59.3606	0.04874		48.4942	0.03194		39.015	0.03263		46.1244	0.04293		48.2052	0.0415
50.4594	0.06029		47.2804	0.0446		47.974	0.04931		49.6502	0.02728		75.5446	0.03306		104.445	0.04597		72.3078	0.04332		67.3948	0.03886		49.3034	0.07906		54.1008	0.03041		45.5464	0.02449		49.2635	0.05018		43.6968	0.05374		45.7198	0.05024		50.0548	0.04232		40.2866	0.03362		48.4364	0.03745
57.2798	0.09991		44.4482	0.05952		33.7552	0.04241		50.286	0.04496		60.2854	0.03879		81.8448	0.07445		72.9436	0.04005		61.7304	0.04078		51.153	0.04138		49.708	0.04366		76.7006	0.04244		44.6412	0.03411		36.4718	0.02724		46.7602	0.04127		48.6098	0.05242		37.859	0.02861		51.4998	0.03693
44.795	0.07326		55.2568	0.04306		46.0088	0.04817		52.7136	0.05677		81.2668	0.05037		77.7988	0.0487		59.3028	0.04263		74.6776	0.04199		62.424	0.07279		49.8814	0.0337		74.2152	0.04499		66.4135	0.07719		50.1126	0.03708		42.6564	0.03946		42.1362	0.03911		44.1592	0.03647		50.1704	0.05171
49.1878	0.07746		40.1132	0.03576		48.8988	0.02418		44.6216	0.05219		75.3134	0.05073		72.25	0.09783		60.9212	0.0317		67.915	0.04009		56.644	0.07704		54.8522	0.05752		65.3718	0.04239		58.4282	0.07666		49.3612	0.04244		50.286	0.03752		46.9336	0.03917		46.9336	0.07346		46.9336	0.03826
51.3264	0.05705		58.5514	0.06183		35.836	0.04435		54.2164	0.0592		52.7136	0.06043		64.2158	0.05559		62.1928	0.02379		62.135	0.03818		55.6614	0.03159		49.13	0.03633		57.3954	0.04269		51.3953	0.04817		49.708	0.05351		51.3264	0.03718		47.1648	0.03592		33.4084	0.01801		57.1064	0.06197
54.621	0.06958		40.46	0.02592		42.483	0.03361		33.7552	0.02155		60.5744	0.04323		76.5272	0.0345		73.2904	0.04817		48.6098	0.02976		54.7944	0.0478		53.6384	0.0323		61.1524	0.0753		46.4689	0.0427		50.3438	0.0543		44.3326	0.0356		42.8876	0.02801		48.6676	0.03675		42.8298	0.03961
49.1878	0.05298		64.8516	0.04704		44.8528	0.0512		41.038	0.04188		69.071	0.06115		66.8746	0.06139		78.03	0.04927		61.4414	0.03201		49.8236	0.03665		52.0778	0.03789		71.2674	0.04516		52.5442	0.05221		42.8876	0.04469		46.1244	0.05566		37.3388	0.04112		48.7254	0.03775		49.3612	0.03664
61.1524	0.10972		48.4942	0.02243		38.4948	0.03044		46.8758	0.0212		52.887	0.05068		64.2158	0.03533		71.8454	0.02278		81.6136	0.03644		53.6962	0.05866		55.9504	0.06675		70.4582	0.03166		45.9054	0.04635		43.5234	0.05386		38.4948	0.03094		51.442	0.04519		41.038	0.03221		41.0958	0.02906
69.1866	0.10034		73.4638	0.03973		34.68	0.02885		57.1642	0.04598		60.401	0.03465		71.8454	0.03491		65.7764	0.0471		69.2444	0.02027		54.2742	0.05989		59.7652	0.051		94.6764	0.04849		44.2199	0.04019		43.0032	0.05113		34.3332	0.03368		44.9106	0.04829		35.2002	0.04184		37.1076	0.04387
51.6732	0.07229		40.46	0.03707		51.8466	0.03974		52.1356	0.06873		57.0486	0.04029		64.3314	0.06318		63.8112	0.03713		56.4128	0.02843		58.7826	0.06829		63.58	0.05494		65.9498	0.05152		47.6968	0.04198		43.2922	0.04865		39.4196	0.03687		41.616	0.05462		44.2748	0.03623		48.9566	0.04024
67.2792	0.08111		41.2692	0.02666		45.1996	0.04067		54.621	0.03478		87.5092	0.03934		74.3308	0.01841		53.6962	0.04162		92.191	0.045		53.754	0.06217		50.1126	0.03792		55.1412	0.03673		38.8636	0.04953		49.0144	0.0503		56.5284	0.05135		40.1132	0.01918		55.2568	0.04774		35.3158	0.05094
64.7938	0.07764		47.4538	0.04986		41.1536	0.03929		47.685	0.05796		103.289	0.03829		80.92	0.0515		64.9094	0.03961		56.4706	0.04548		60.9212	0.06357		56.7018	0.06917		49.8814	0.04926		41.8824	0.03884		46.5868	0.05438		47.7428	0.04494		44.3904	0.03286		38.7838	0.02409		41.7894	0.037
50.5172	0.06616		69.649	0.05649		52.3668	0.0171		47.974	0.05995		66.6434	0.04077		93.5204	0.06103		60.1698	0.02127		59.4762	0.01831		64.3892	0.05934		63.291	0.05859		59.823	0.03981		43.315	0.04133		48.4942	0.04606		40.3444	0.02435		41.9628	0.04305		47.8006	0.0476		42.483	0.02372
45.373	0.07145		54.4476	0.03082		34.969	0.01255		34.9112	0.03328		64.736	0.04513		79.4172	0.04405		65.314	0.03786		66.181	0.01945		53.1182	0.06495		49.8814	0.04742		57.3954	0.03636		47.7734	0.04616		46.1822	0.05203		43.8124	0.03901		55.4302	0.05046		44.9106	0.06633		41.2114	0.02777
51.9622	0.05544		49.6502	0.03786		37.9168	0.02242		62.2506	0.03281		64.0424	0.03924		60.9212	0.10669		63.2332	0.04987		65.1984	0.03951		54.5632	0.05999		54.4476	0.04264		66.6434	0.05552		50.9597	0.04026		50.2282	0.06073		37.3388	0.02891		44.6794	0.02552		45.6042	0.04233		41.9628	0.03587
49.8814	0.07405		40.8068	0.05294		33.813	0.02078		40.3444	0.04177		74.562	0.01791		87.5092	0.05265		65.3718	0.03674		63.2332	0.0287		50.3438	0.07737		62.5974	0.04605		46.529	0.04419		42.1497	0.0434		50.9218	0.05825		47.3382	0.04069		40.8646	0.03614		47.8006	0.03225		38.437	0.02888
62.424	0.06025		46.0666	0.05142		37.859	0.02018		36.125	0.02591		75.3134	0.05735		77.6254	0.09735		68.493	0.02981		63.4644	0.03828		55.3146	0.05361		64.9094	0.05708		72.3078	0.04684		50.7454	0.04152		50.4016	0.07468		45.3152	0.05576		38.148	0.0639		46.1822	0.04996		53.2338	0.03123
46.5868	0.06167		67.626	0.04743		41.0958	0.06822		49.1878	0.04899		62.5974	0.04197		65.7186	0.05314		51.6154	0.07626		74.6776	0.03232		56.9908	0.09983		59.1294	0.05503		45.8354	0.03869		42.9229	0.05934		47.5694	0.05707		39.6508	0.03122		41.905	0.03506		37.8012	0.03291		44.7372	0.0338
70.8628	0.07299		43.639	0.05434		47.974	0.01712		40.46	0.04884		60.1698	0.03123		92.8268	0.06816		74.9088	0.02754		56.933	0.03146		62.2506	0.09144		53.0604	0.0444		51.6732	0.05168		51.7109	0.04596		47.5694	0.05707		34.7378	0.03103		47.8584	0.04532		37.6278	0.04088		57.6266	0.03576
46.24	0.05619		52.0778	0.05345		42.483	0.03852		37.4544	0.0477		61.557	0.04163		70.6316	0.06542		60.4588	0.02562		70.1692	0.05716		58.2046	0.06262		63.9268	0.02126		57.3954	0.03617		55.14	0.06245		47.5694	0.05878		44.1014	0.04777		43.1188	0.03763		51.7888	0.05834		52.4824	0.04654
49.1878	0.06442		52.309	0.03476		42.2518	0.02714		47.1648	0.04253		75.429	0.05854		62.9442	0.06041		64.1002	0.03555		61.1524	0.04221		61.3836	0.09054		68.8398	0.03614		54.5054	0.06667		43.1452	0.03824		40.5756	0.04376		42.9454	0.0319		49.3612	0.04999		44.9684	0.04728		43.4656	0.05966
44.1014	0.07412		48.0896	0.07208		37.57	0.03029		42.0206	0.03869		72.7702	0.04258		65.4296	0.03417		54.1008	0.03866		81.7292	0.03592		57.6844	0.05792		65.3718	0.03392		56.1238	0.05426		45.7515	0.0556		46.0088	0.0527		39.9976	0.03598		43.639	0.03655		43.35	0.05898		41.8472	0.03918
94.0406	0.06681		51.442	0.05922		50.286	0.01567		62.135	0.03869		63.7534	0.03929		78.03	0.03244		61.0946	0.0298		62.3084	0.04035		60.69	0.05235		55.5458	0.07009		63.6956	0.03972		58.1894	0.05145		51.6732	0.06858		44.4482	0.04356		43.4078	0.02249		39.5352	0.06863		45.4886	0.03491
46.818	0.08084		50.286	0.03108		38.726	0.03596		63.4066	0.03905		72.3078	0.06497		72.6546	0.02073		67.1636	0.04085		72.4234	0.03786		60.8634	0.05598		59.0716	0.05288		55.0834	0.07051		45.3826	0.05333		47.2226	0.06839		42.7142	0.03724		35.8938	0.03993		56.1816	0.05166		43.0032	0.04498
42.5408	0.05318		51.9622	0.05062		43.0032	0.01843		47.396	0.04918		68.1462	0.04637		74.2152	0.07679		57.8578	0.03034		58.2046	0.02924		61.4992	0.07351		57.6844	0.04705		49.8236	0.03644		38.3098	0.04646		36.5874	0.05607		45.6042	0.0467		40.8646	0.03994		44.4482	0.03135		45.8354	0.04452
47.5694	0.0772		38.8994	0.02342		53.465	0.03893		49.5346	0.04178		75.2556	0.03775		86.7578	0.05332		55.8348	0.02821		65.5452	0.0464		51.731	0.05093		64.0424	0.06724		91.4974	0.07004		48.776	0.06029		44.5638	0.0501		38.8416	0.04046		44.1014	0.03096		46.4712	0.03662		36.4718	0.0257
44.5638	0.05561		55.6036	0.02841		36.2406	0.03057		39.7086	0.03534		86.5844	0.06403		59.9964	0.04236		70.227	0.02285		63.869	0.04783		58.3202	0.06449		51.6732	0.04391		62.8286	0.0388		49.152	0.07017		47.7428	0.06045		41.2114	0.02781		44.1014	0.03072		34.0442	0.02667		43.928	0.02897
53.8118	0.06601		75.1978	0.04484		40.9224	0.02133		39.015	0.02446		72.3078	0.04785		64.2158	0.05541		54.7366	0.01329		74.9088	0.04037		55.6614	0.06624		50.4016	0.04079		59.3028	0.0467		48.8032	0.03918		49.419	0.07053		46.529	0.03749		52.02	0.04952		46.6446	0.04748		40.8068	0.02482
49.8236	0.07945		43.5234	0.07166		46.2978	0.04413		45.4886	0.04863		94.214	0.04191		81.4402	0.06183		74.2152	0.05728		78.7236	0.03966		54.9678	0.05608		56.355	0.03649		50.0548	0.04594		45.8584	0.06814		41.5582	0.05824		40.9224	0.04014		44.506	0.03767		44.506	0.03581		32.657	0.01906
50.864	0.0741		60.5744	0.0744		40.2866	0.05568		39.7664	0.04662		51.6154	0.02687		68.3196	0.04299		82.8852	0.06187		56.066	0.03863		59.3028	0.08327		60.401	0.04249		70.227	0.04413		44.315	0.08519		46.4134	0.06976		41.7316	0.04326		46.24	0.04777		40.3444	0.03558		45.1996	0.02862
65.892	0.10476		40.5178	0.04993		35.0846	0.02344		44.1014	0.04626		53.0604	0.02902		92.0176	0.03549		63.9846	0.04668		57.4532	0.0268		54.1008	0.06079		58.0312	0.05849		63.6956	0.05833		46.9996	0.06055		57.8	0.06466		34.8534	0.03296		44.6216	0.03675		46.0666	0.04995		45.8354	0.02889
55.5458	0.05216		48.6676	0.03984		52.4824	0.04119		40.171	0.02215		59.0138	0.03964		65.4296	0.04466		71.5564	0.05682		49.9392	0.025		58.3202	0.05597		83.232	0.06645		50.864	0.08485		47.9193	0.06049		57.0486	0.05664		42.772	0.04721		47.6272	0.03235		39.3618	0.03956		39.4774	0.02804
56.1238	0.06625		53.8696	0.05049		47.107	0.01744		34.8534	0.03541		57.9734	0.03143		80.8044	0.07095		86.0064	0.05901		60.7478	0.03208		63.9268	0.08894		67.6838	0.05436		55.1412	0.03743		47.6445	0.06467		45.084	0.05538		35.547	0.03297		55.488	0.02727		44.0436	0.02272		38.0324	0.0297
42.772	0.06225		60.69	0.04274		58.378	0.0516		47.0492	0.03641		58.8404	0.04095		74.2152	0.11773		80.3998	0.05963		78.6658	0.0376		55.0834	0.05845		74.3886	0.0392		61.846	0.05268		47.1393	0.04969		44.795	0.04901		44.6794	0.03228		47.2226	0.02902		48.2052	0.05348		43.35	0.03227
48.6098	0.06018		50.286	0.05531		42.5408	0.03163		45.8932	0.05089		100.167	0.04874		67.2792	0.0194		77.9722	0.03252		63.1754	0.0663		54.8522	0.09123		76.9896	0.07956		75.718	0.04933		32.6216	0.03021		54.621	0.07121		41.5004	0.04478		43.639	0.05534		51.0952	0.0443		50.9218	0.043
51.2686	0.07594		49.9392	0.03418		54.5054	0.01516		50.4594	0.04546		76.007	0.05172		62.2506	0.06413		74.7932	0.05671		71.0362	0.05022		62.3084	0.06718		62.9442	0.03958		75.4868	0.06694		41.107	0.04176		47.974	0.06155		47.2804	0.05309		41.6738	0.02488		39.1306	0.03287		44.6216	0.04891
60.7478	0.07494		39.9976	0.02837		46.1822	0.01823		57.2798	0.0618		66.47	0.03276		73.406	0.06029		65.025	0.02889		56.933	0.04006		54.621	0.08282		58.4358	0.04428		59.0138	0.03531		43.9012	0.0609		47.974	0.06155		42.6564	0.02617		38.726	0.03154		39.304	0.03419		42.6564	0.03425
49.3612	0.06625		60.8634	0.0361		45.2574	0.01913		45.662	0.03374		78.7236	0.04288		79.8796	0.03449		61.9616	0.041		69.7646	0.03666		57.3376	0.06487		55.4302	0.05639		60.5744	0.0621		39.5043	0.05312		50.0548	0.07283		43.8124	0.03337		47.107	0.03125		47.7428	0.03808		43.928	0.02981
54.332	0.06509		46.5868	0.0469		39.9976	0.0139		53.9852	0.05166		66.5856	0.04759		87.6248	0.05684		67.8572	0.02996		79.6484	0.03883		59.3028	0.05886		52.7714	0.04663		61.0946	0.0283		39.9445	0.04436		46.9914	0.04815		43.061	0.03454		44.6216	0.02691		43.8702	0.03641		49.5346	0.04076
68.4352	0.08251		65.2562	0.0706		47.685	0.02902		40.749	0.0278		57.8	0.03864		67.2792	0.02627		65.9498	0.04247		74.0996	0.05289		51.731	0.06167		65.0828	0.04546		53.1182	0.02305		37.0831	0.02587		48.7254	0.05959		40.1132	0.0387		38.6104	0.02637		48.6098	0.05307		42.7142	0.03008
53.4072	0.07914		52.02	0.04317		60.7478	0.06295		58.2624	0.04592		69.7068	0.05909		90.168	0.06111		71.1518	0.06103		66.47	0.02201		58.3202	0.07611		59.0138	0.04356		57.9734	0.04007		49.1733	0.06038		47.0492	0.06687		47.0492	0.0463		58.4358	0.05457		41.9628	0.05474		44.217	0.03259
44.217	0.05219		67.1636	0.05012		32.1946	0.02397		40.3444	0.02658		60.401	0.05322		77.452	0.06724		61.0946	0.02837		60.112	0.03497		62.7708	0.10206		51.153	0.03755		59.3028	0.04669		50.2976	0.05786		61.846	0.07621		48.552	0.04286		37.6278	0.02731		46.1822	0.04259		40.6334	0.04186
66.47	0.06795		56.4706	0.04278		45.4886	0.03571		39.7086	0.03748		54.3898	0.03552		64.3892	0.03537		88.4918	0.02738		67.1058	0.03582		51.0952	0.06845		61.7882	0.04486		66.5856	0.06216		52.5375	0.06599		52.1356	0.05078		40.3444	0.04017		42.3674	0.0331		33.4662	0.03188		48.6098	0.0389
72.539	0.07495		46.1244	0.05662		37.8012	0.01835		50.4594	0.04593		73.2326	0.06653		64.5626	0.04895		64.0424	0.04956		57.3954	0.02984		51.2108	0.06806		52.309	0.0692		58.956	0.03747		50.0065	0.03659		38.437	0.04471		39.1306	0.05216		41.7894	0.0614		47.5116	0.0272		44.217	0.04681
44.506	0.08315		55.3146	0.0539		45.373	0.02671		42.483	0.04434		70.7472	0.05175		71.2674	0.03995		60.9212	0.04152		61.0368	0.03071		59.823	0.06189		60.112	0.06314		53.465	0.05716		57.2311	0.06695		42.194	0.06998		43.9858	0.03827		46.529	0.03928		38.5526	0.04212		43.1188	0.04886
47.0492	0.07693		38.8994	0.03357		40.3444	0.03672		49.3612	0.05228		59.823	0.04771		87.5092	0.06575		67.5682	0.06926		58.8404	0.03031		50.6906	0.03291		49.3612	0.06135		62.424	0.06056		55.4421	0.07302		46.5868	0.06746		42.194	0.04711		48.3786	0.05016		41.3848	0.0672		49.3612	0.03325
58.7248	0.07668		46.4134	0.04847		42.4252	0.03939		31.9634	0.03533		75.3712	0.03834		75.2556	0.07553		72.0188	0.09321		78.4346	0.02671		61.7882	0.08499		89.6478	0.06043		60.6322	0.0417		52.2249	0.07019		53.2338	0.05576		52.4824	0.04094		42.7142	0.03684		47.974	0.03909		54.9678	0.04039
45.4886	0.08163		58.4936	0.03434		45.1996	0.01812		65.4296	0.05638		64.2736	0.03264		66.759	0.05597		68.8976	0.02577		56.1238	0.0675		53.0026	0.04166		52.4246	0.05685		56.7018	0.02919		47.6579	0.06054		45.3152	0.05507		45.4308	0.03911		37.3966	0.04737		51.6732	0.0537		42.5408	0.03882
72.7702	0.07356		48.8988	0.04743		39.1306	0.01873		35.0268	0.02855		66.47	0.0373		72.0188	0.047		67.1636	0.03953		58.6092	0.05827		69.071	0.0778		50.6906	0.0349		62.9442	0.02896		48.8196	0.04624		44.795	0.03942		42.4252	0.03739		52.887	0.04008		49.3612	0.05331		40.0554	0.03402
43.0032	0.05214		57.2798	0.04539		42.5986	0.03737		44.7372	0.03639		63.2332	0.04747		68.493	0.02749		75.3134	0.01904		69.7646	0.04406		55.2568	0.06678		49.4768	0.0529		63.7534	0.05725		43.968	0.04429		51.4998	0.06515		41.327	0.0406		41.616	0.04208		43.639	0.03178		39.593	0.02318
65.0828	0.05911		49.8236	0.04394		44.6794	0.03344		47.396	0.04074		54.621	0.04336		85.544	0.02676		71.2674	0.03507		54.5632	0.03443		57.6266	0.05361		53.3494	0.03368		80.1686	0.04914		44.1545	0.0484		47.5116	0.046		42.5408	0.04411		46.8758	0.04034		49.3034	0.03627		43.6968	0.02858
61.4414	0.06814		52.4824	0.05654		44.8528	0.04274		43.2922	0.03017		68.6664	0.03986		68.493	0.05859		61.6148	0.025		69.8802	0.02319		53.2338	0.05931		61.4414	0.05191		49.0722	0.04652		65.2348	0.05103		45.5464	0.05756		47.8006	0.0365		57.1642	0.03829		39.015	0.02523		46.529	0.03677
46.1822	0.05215		68.8398	0.04963		63.4066	0.02372		48.8988	0.04811		52.309	0.02754		62.4818	0.06965		66.8168	0.01663		57.9156	0.03405		58.7826	0.04823		69.071	0.04951		47.5694	0.04266		45.7975	0.04664		48.3208	0.05241		39.6508	0.03313		54.3898	0.04725		43.2344	0.04147		47.1648	0.03285
49.4768	0.05346		40.3444	0.02369		47.2804	0.02991		47.9162	0.04388		64.0424	0.0379		74.2152	0.03791		62.4818	0.03701		67.1636	0.05863		62.2506	0.05274		51.9622	0.05867		56.933	0.05078		56.3556	0.05326		44.506	0.04827		48.1474	0.04223		39.1306	0.05008		42.5408	0.02833		47.9162	0.04119
70.2848	0.09614		49.8814	0.03578		45.1418	0.01722		63.1754	0.06797		65.6608	0.04259		80.3998	0.13		82.3072	0.05109		52.6558	0.02238		66.8168	0.09728		59.245	0.04595		59.0138	0.05636		46.2489	0.05392		53.9274	0.0433		41.4426	0.03973		45.6042	0.03736		38.9572	0.02953		41.9628	0.03472
58.956	0.087		44.4482	0.02788		39.4196	0.02087		43.6968	0.06149		84.966	0.04093		58.1468	0.03718		70.6316	0.05053		56.4706	0.02559		54.6788	0.04911		63.9268	0.04956		61.6148	0.07964		39.601	0.04559		50.575	0.06229		44.3904	0.03783		45.0262	0.03739		47.5116	0.03233		36.703	0.03825
[truncated: 17,190 more rows]
